# Supplementary material for: Transcriptomes of an Array of Chicken Ovary, Intestinal, and Immune Cells and Tissues
Source: Front Genet. 2021 Jun 30;12:664424. doi: 10.3389/fgene.2021.664424 (PMC8278112; doi:10.3389/fgene.2021.664424)
Supplement: Supplementary Table 2 — Cell type specific transcripts and lncRNAs (related to Figure 2). (Sheet 1) Protein coding RNAs. (Sheet 2) lncRNAs. (Sheet 3) Extended lncRNA analysis transcripts. [file Table_2.XLSX]

## Sheet: protein coding RNAs
Supplemental Table 2: Cell Type Specific Transcripts and lncRNAs
Sheet 1: Protein Coding RNAs
B Cell			Bursa			Ileum			Jejunum			Macrophage (lung)			Monocyte (blood)			Ovary			Proximal Cecum			T cell (spleen)			Thymus
Transcript ID	Gene Name	TPM	Transcript ID	Gene Name	TPM	Transcript ID	Gene Name	TPM	Transcript ID	Gene Name	TPM	Transcript ID	Gene Name	TPM	Transcript ID	Gene Name	TPM	Transcript ID	Gene Name	TPM	Transcript ID	Gene Name	TPM	Transcript ID	Gene Name	TPM	Transcript ID	Gene Name	TPM
ENSGALT00000000541	METTL2B	8.13858	ENSGALT00000000328	GH	4.97773	ENSGALT00000001342	CHST6	7.4191	ENSGALT00000000975	CDK18	15.3088	ENSGALT00000000359	FER	1.07408	ENSGALT00000010897	CDK5RAP1	226.074	ENSGALT00000000059	WFIKKN1	8.25123	ENSGALT00000000344	ENSGALG00000000264	2.50495	ENSGALT00000000842	KANSL1	1.59347	ENSGALT00000000051	CTRB2	1.33556
ENSGALT00000001767	KCNJ1	13.0361	ENSGALT00000000620	TMPRSS9	1.11833	ENSGALT00000002712	TENM2	8.26573	ENSGALT00000004770	SCARB1	202.838	ENSGALT00000000386	ENSGALG00000000295	2.13934	ENSGALT00000036903	HPCAL1	9.62653	ENSGALT00000000598	KCNA10	5.50588	ENSGALT00000000472	TIMM44	2.57637	ENSGALT00000002145	IL12B	1.1027	ENSGALT00000000169	BMP10	1.97772
ENSGALT00000004086	MSS51	27.0266	ENSGALT00000002032	RBL1	23.0044	ENSGALT00000004538	CREBRF	8.51171	ENSGALT00000009350	FAM219A	15.0723	ENSGALT00000001231	WNT11	6.3862	ENSGALT00000038670	CD180	7.61312	ENSGALT00000000757	REN	39.7438	ENSGALT00000001194	ENSGALG00000000820	1.3125	ENSGALT00000003678	DOCK3	1.14754	ENSGALT00000000457	KRTAP10-4	1.24598
ENSGALT00000010393	ENSGALG00000006440	13.2603	ENSGALT00000006265	SDC4	2.22082	ENSGALT00000004668	MBTD1	7.98524	ENSGALT00000019917	ACMSD	12.8248	ENSGALT00000001270	TRIM50	4.98689	ENSGALT00000064410	CDC14B	16.0498	ENSGALT00000000876	ZCCHC17	9.55961	ENSGALT00000001888	ENSGALG00000001244	3.61278	ENSGALT00000003862	WDR24	1.66362	ENSGALT00000001277	ENSGALG00000018415	1.16619
ENSGALT00000011556	ENSGALG00000007133	3.95169	ENSGALT00000008651	ACTR8	1.62735	ENSGALT00000005897	GDNF	10.5011	ENSGALT00000024597	TBX19	8.09895	ENSGALT00000001284	ART1	3.17781	ENSGALT00000069280	ENSGALG00000041342	11.1338	ENSGALT00000001607	NR6A1	15.9243	ENSGALT00000002179	GUCA1A	1.61534	ENSGALT00000004025	CFAP70	5.79305	ENSGALT00000002986	SRRM3	3.08805
ENSGALT00000011797	CNGA2	9.61759	ENSGALT00000009113	ARHGAP29	10.9958	ENSGALT00000007278	NPPC	9.93421	ENSGALT00000039749	CD36	23.9685	ENSGALT00000001343	FAM187A	1.30843	ENSGALT00000077489	NXNL1	12.5974	ENSGALT00000001693	LHX2	1.72874	ENSGALT00000002297	KCND3	1.71636	ENSGALT00000004246	FAM149B1	3.62636	ENSGALT00000005485	OCM	6.31077
ENSGALT00000012279	ASB12	6.1618	ENSGALT00000009537	XAF1	2.07255	ENSGALT00000007776	RPS24	8.715	ENSGALT00000048851	C11H19orf12	10.2879	ENSGALT00000001613	ENSGALG00000001078	1.88624	ENSGALT00000085463	ENSGALG00000052105	15.974	ENSGALT00000001836	TP53INP2	13.6792	ENSGALT00000003012	RSPO1	1.42741	ENSGALT00000004824	AGFG1	1.09053	ENSGALT00000006803	GRIFIN	4.88567
ENSGALT00000012528	ENSGALG00000007727	1.60475	ENSGALT00000010189	ENSGALG00000006302	2	ENSGALT00000008451	SYT9	12.3075	ENSGALT00000052701	CACNB2	9.03296	ENSGALT00000001639	ADGRD2	2.09844	ENSGALT00000087232	ENSGALG00000046502	20.3674	ENSGALT00000001874	ANKRD24	6.93529	ENSGALT00000003851	FBXL16	1.6118	ENSGALT00000005535	MAST3	6.4921	ENSGALT00000008484	KLHL40	2.78744
ENSGALT00000015076	KCNK18	5.20272	ENSGALT00000010293	PTPN5	2.15063	ENSGALT00000008705	ERC2	10.1822	ENSGALT00000060427	CHODL	70.6252	ENSGALT00000002230	JAM3	6.05031	ENSGALT00000090961	ENSGALG00000054095	9.77554	ENSGALT00000001996	ARHGAP44	27.2519	ENSGALT00000004065	RIMBP2	4.58743	ENSGALT00000005607	CFAP77	2.8589	ENSGALT00000010161	HS3ST4	1.6985
ENSGALT00000015463	VPS50	5.10562	ENSGALT00000010720	RHCG	1.70274	ENSGALT00000010597	ENSGALG00000006564	11.9146	ENSGALT00000061050	CASP14	155.971	ENSGALT00000002644	ENSGALG00000003022	1.72023	ENSGALT00000091197	LIMS1	10.3264	ENSGALT00000002609	GABRA1	5.51453	ENSGALT00000004945	EDEM2	3.42625	ENSGALT00000006230	EPS15L1	1.21268	ENSGALT00000010581	INS	3.9181
ENSGALT00000015924	SMYD2	8.48728	ENSGALT00000011272	ENSGALG00000006958	2.4671	ENSGALT00000011236	WDR6	25.5502	ENSGALT00000065488	ENSGALG00000030139	66.9112	ENSGALT00000002987	CORO2A	1.46629	ENSGALT00000091234	ENSGALG00000034376	13.0284	ENSGALT00000002639	ENSGALG00000001721	832.334	ENSGALT00000004965	PRLHRL	3.14476	ENSGALT00000006266	QSOX1	2.31959	ENSGALT00000011644	TK1	1.07036
ENSGALT00000017352	FOXN3	8.97993	ENSGALT00000011840	BICDL1	3.14292	ENSGALT00000011305	APOOL	6.60478	ENSGALT00000079836	SLC1A7	9.02643	ENSGALT00000003834	DYDC2	5.64169	ENSGALT00000092685	SHE	10.1893	ENSGALT00000002663	LHX3	59.8618	ENSGALT00000005154	ATP6V0A1	4.58603	ENSGALT00000006663	SLTM	1.14583	ENSGALT00000012833	CHRNG	5.28348
ENSGALT00000017923	OSBPL3	4.21054	ENSGALT00000012180	ENSGALG00000007530	2.14634	ENSGALT00000011727	TGFB1I1	9.1631	ENSGALT00000080355	ATP2B1	108.514	ENSGALT00000004063	ENSGALG00000002577	1.4949	ENSGALT00000096481	RASGEF1B	22.1675	ENSGALT00000003000	SLC25A24	19.154	ENSGALT00000005232	SLC38A8	2.37714	ENSGALT00000009616	OXSR1	1.32441	ENSGALT00000014276	ACTR2	2.90423
ENSGALT00000018722	HCRT	21.3668	ENSGALT00000012997	ITGA11	3.14095	ENSGALT00000011857	CTNND1	22.0356	ENSGALT00000085982	PYY	152.415	ENSGALT00000004399	PSTPIP1	1.1581	ENSGALT00000099495	RIN3	179.082	ENSGALT00000003248	ENSGALG00000002083	6.82514	ENSGALT00000005718	AZIN2	2.21899	ENSGALT00000009667	HOMER2	8.68623	ENSGALT00000016006	GJD2	1.33652
ENSGALT00000019160	AGBL3	3.338	ENSGALT00000013434	TBX5	2	ENSGALT00000017386	SHC3	1.00002	ENSGALT00000088590	BBOX1	30.9056	ENSGALT00000004694	ZNF341	1.25095	ENSGALT00000099669	RELCH	9.01639	ENSGALT00000003325	ENSGALG00000050054	21.7352	ENSGALT00000006045	UBE2F	1.76495	ENSGALT00000009782	TEKT1	1.34428	ENSGALT00000018923	TMEM179	1.37545
ENSGALT00000021597	ARHGEF33	5.44096	ENSGALT00000013599	CAV3	1.8036	ENSGALT00000023164	NWD2	7.19579	ENSGALT00000088800	G2E3	13.2006	ENSGALT00000004758	ENSGALG00000003013	3.46914	ENSGALT00000104949	IL6	49.0093	ENSGALT00000003427	TLX3	6.02352	ENSGALT00000006493	GRIA1	2.10601	ENSGALT00000010301	TM4SF19	1.3571	ENSGALT00000019832	FSHB	1.57143
ENSGALT00000024661	CHD1Z	4.62477	ENSGALT00000013962	LAMP2	2.50239	ENSGALT00000024855	PROS1	8.73262	ENSGALT00000090889	ENSGALG00000016285	8.23151	ENSGALT00000005249	ENSGALG00000003313	1.09579	ENSGALT00000105452	ENSGALG00000007248	8.5268	ENSGALT00000003480	LHX9	30.4281	ENSGALT00000007990	CERCAM	1.99435	ENSGALT00000011022	ENSGALG00000006818	1.10134	ENSGALT00000020947	MYLK4	1.34483
ENSGALT00000024985	PDZK1	4.45755	ENSGALT00000014934	AFF2	3.78437	ENSGALT00000025619	IMPG1	13.2531	ENSGALT00000091975	ENSGALG00000038978	9.67773	ENSGALT00000006262	APBA2	3.85791	ENSGALT00000107492	EPN2	34.8722	ENSGALT00000004489	NEURL1B	18.5083	ENSGALT00000008525	CDH8	1.43882	ENSGALT00000011062	TSPAN4	1.27322	ENSGALT00000021478	SLCO1B3	3.84298
ENSGALT00000038984	ENSGALG00000023506	4.74834	ENSGALT00000015668	SPATA17	3.51702	ENSGALT00000026983	CD2AP	34.8836	ENSGALT00000094235	SLC4A7	31.1485	ENSGALT00000007054	OR1052	1.19051	ENSGALT00000107636	ENSGALG00000047265	7.44212	ENSGALT00000004742	CA10	7.22642	ENSGALT00000008784	SYNRG	1.29166	ENSGALT00000012233	ENSGALG00000007565	1.64452	ENSGALT00000022851	AVP	2.42857
ENSGALT00000040159	RGS21	5.04662	ENSGALT00000016484	TTC6	2.3342	ENSGALT00000037487	ENSGALG00000023036	12.5564	ENSGALT00000095591	MX1	21.7261	ENSGALT00000007270	CELA2A	2.09605				ENSGALT00000005593	SGK2	0.348675	ENSGALT00000009081	NF1	1.62866	ENSGALT00000012339	ENSGALG00000007624	2.79794	ENSGALT00000023817	TRAPPC13	1.25122
ENSGALT00000042711	FGF23	6.17089	ENSGALT00000016528	SMARCA2	2.18197	ENSGALT00000038481	BTBD17	8.2281	ENSGALT00000098866	CNKSR1	10.5678	ENSGALT00000007377	ENSGALG00000004630	1.15972				ENSGALT00000006047	DKK1	30.9682	ENSGALT00000009984	KYAT3	4.6839	ENSGALT00000014100	ICOS	1.86715	ENSGALT00000025538	MRAP2	1.26059
ENSGALT00000043485	ENSGALG00000027983	1.16237	ENSGALT00000016710	FCF1	3.58567	ENSGALT00000039481	ENSGALG00000007656	23.0101	ENSGALT00000100129	ENSGALG00000053883	9.1492	ENSGALT00000007878	OPNP	4.76836				ENSGALT00000006106	ENSGALG00000036846	5.95203	ENSGALT00000010315	RNF32	1.57187	ENSGALT00000014440	ZNF618	2.27788	ENSGALT00000026816	GPR143	3.37061
ENSGALT00000043515	ZFYVE27	4.51137	ENSGALT00000017975	HNRNPA2B1	3.93212	ENSGALT00000041261	UGGT1	332.611	ENSGALT00000102851	CD36	13.6167	ENSGALT00000008177	ORM1	6.50461				ENSGALT00000006192	PRDM12	27.3977	ENSGALT00000012427	KCNIP2	7.45919	ENSGALT00000014988	ENSGALG00000009205	2.39963	ENSGALT00000027159	ATP4B	3.67788
ENSGALT00000044141	MESP1	5.27116	ENSGALT00000020097	SLC39A8	2.47814	ENSGALT00000042858	CCR10	7.5726	ENSGALT00000103697	ENSGALG00000002099	19.2627	ENSGALT00000008476	TBX4	32.5814				ENSGALT00000006887	OSER1	12.7791	ENSGALT00000013296	KSR2	2.46447	ENSGALT00000016356	LRBA	2.81215	ENSGALT00000030660	MYF6	2
ENSGALT00000044786	INTS3	5.36343	ENSGALT00000022180	LRRC2	2.23669	ENSGALT00000045130	AKAIN1	6.49217	ENSGALT00000103701	SEC31A	8.2144	ENSGALT00000009517	DIPK1A	1.63487				ENSGALT00000007066	ENSGALG00000004441	272.123	ENSGALT00000014688	ST6GALNAC3	1.5711	ENSGALT00000016540	SLC35B2	1.43273	ENSGALT00000032362	ENSGALG00000007110	1.55263
ENSGALT00000045672	ENSGALG00000028457	5.28134	ENSGALT00000022968	GABRA4	1.87421	ENSGALT00000046985	CFTR	9.15137	ENSGALT00000105866	SPRYD7	8.85986	ENSGALT00000010591	SEMA3A	1.75747				ENSGALT00000007077	NPFFR1	7.52889	ENSGALT00000015824	DYNC1I1	2.51135	ENSGALT00000016778	NAV3	1.1198	ENSGALT00000034078	ENSGALG00000021163	1.68839
ENSGALT00000046080	MBNL2	4.92994	ENSGALT00000022997	YIPF7	1.60976	ENSGALT00000050350	TBC1D32	6.3561	ENSGALT00000106938	SEL1L3	317.409	ENSGALT00000010598	ENSGALG00000006565	2.11492				ENSGALT00000007161	ENSGALG00000004495	4.11859	ENSGALT00000016530	TCTE1	2.20598	ENSGALT00000017374	TTC7B	1.82417	ENSGALT00000034319	ENSGALG00000021286	2.05293
ENSGALT00000046107	RLBP1	7.03623	ENSGALT00000023282	LLGL1	1.80336	ENSGALT00000051036	PGM2L1	8.55337	ENSGALT00000107353	EOGT	16.7718	ENSGALT00000011570	SIK3	2.07867				ENSGALT00000007401	ENSGALG00000004646	7.20263	ENSGALT00000017783	B3GALT1	1.97961	ENSGALT00000017888	STK31	5.00011	ENSGALT00000039981	IL3	2.52232
ENSGALT00000046281	ENSGALG00000047025	6.35162	ENSGALT00000024177	S100Z	3.46873	ENSGALT00000051585	UPP1	63.9004				ENSGALT00000011689	UTS2B	2.45953				ENSGALT00000007559	BMP15	153.391	ENSGALT00000017862	ENSGALG00000020388	3.44543	ENSGALT00000019735	ENSGALG00000012080	4.58128	ENSGALT00000044293	IL17C	4.92377
ENSGALT00000046516	ENSGALG00000041961	3.9053	ENSGALT00000024279	SLC22A16	2.99286	ENSGALT00000053867	FHL3	10.2253				ENSGALT00000011997	ARMC4	2.08684				ENSGALT00000008436	GPR88	19.1682	ENSGALT00000018390	EPYC	5.92298	ENSGALT00000020969	DENND2A	2.41763	ENSGALT00000045135	ENSGALG00000028402	2.08142
ENSGALT00000046534	HHEX	4.53452	ENSGALT00000024525	DAZAP1	1.68348	ENSGALT00000054591	SORCS2	6.38145				ENSGALT00000012457	BCL9L	2.00212				ENSGALT00000008606	ENSGALG00000005361	14.2	ENSGALT00000018891	ENSGALG00000023179	2	ENSGALT00000021209	WNK1	2.10847	ENSGALT00000047453	ENSGALG00000033381	3.59902
ENSGALT00000046833	SPTAN1	5.32593	ENSGALT00000027174	PROZ	2	ENSGALT00000055148	ABAT	21.6497				ENSGALT00000012682	ANKK1	6.6481				ENSGALT00000009020	CAMK2A	5.22866	ENSGALT00000019309	SPATA5	1.97911	ENSGALT00000022168	ENSGALG00000013625	5.86567	ENSGALT00000049160	CA3A	1.25523
ENSGALT00000046942	WIPI1	38.8237	ENSGALT00000027361	TBC1D4	9.84037	ENSGALT00000056120	RAB28	18.25				ENSGALT00000014140	ENSGALG00000008689	4.29538				ENSGALT00000009103	TTC28	0.049564	ENSGALT00000019438	SEPTIN3	1.10199	ENSGALT00000023948	LPIN2	9.15331	ENSGALT00000049267	GATA3	9.45459
ENSGALT00000047383	TFAP2E	4.81425	ENSGALT00000027820	GPR83	1.81018	ENSGALT00000058562	MYLK3	10.2432				ENSGALT00000014155	WDR63	1.5				ENSGALT00000009316	CHRNA4	39.3926	ENSGALT00000019851	EGF	1.75372	ENSGALT00000023960	TPD52L1	1.36818	ENSGALT00000049633	TMEM131L	1.24975
ENSGALT00000048517	SEPT5	5.27573	ENSGALT00000027844	MTNR1B	1.75261	ENSGALT00000061152	IL17RD	9.22613				ENSGALT00000014656	PCARE	1.69129				ENSGALT00000009554	AGTR2	31.0802	ENSGALT00000019979	DMC1	1.66158	ENSGALT00000024761	RTN4IP1	1.41852	ENSGALT00000049649	ENSGALG00000053628	8.71098
ENSGALT00000048563	MTFR2	4.7784	ENSGALT00000030682	TAFA2	1.91436	ENSGALT00000062824	TTC13	9.14914				ENSGALT00000014750	CDK14	1.48519				ENSGALT00000009583	GLMN	17.0019	ENSGALT00000021362	SPATA48	2	ENSGALT00000024864	NSUN3	1.15974	ENSGALT00000049967	ERCC8	4.39084
ENSGALT00000051301	ENSGALG00000038576	107.91	ENSGALT00000031745	NCOA7	48.0388	ENSGALT00000064819	HMCN1	12.0532				ENSGALT00000016069	HELB	1.41315				ENSGALT00000009614	RBP3	48.4028	ENSGALT00000021418	PLCZ1	4	ENSGALT00000025457	RNGTT	1.35866	ENSGALT00000050847	OPTC	2.82665
ENSGALT00000054494	NAB2	6.45339	ENSGALT00000031915	PIGF	1.9318	ENSGALT00000067060	ERBIN	8.70392				ENSGALT00000016905	GPR87	29.8002				ENSGALT00000010090	ENSGALG00000006239	12.2625	ENSGALT00000021741	ANO3	2.53432	ENSGALT00000025522	HNRNPR	2.29529	ENSGALT00000050873	EN1	2.46394
ENSGALT00000055202	SLC17A8	1.74174	ENSGALT00000033221	FAM183A	2.03443	ENSGALT00000073698	SPOCK3	6.97056				ENSGALT00000016914	CLRN1	7.83665				ENSGALT00000010232	IL9	6.12937	ENSGALT00000022217	NOX3	2.95224	ENSGALT00000025623	CD8A	7.15418	ENSGALT00000050876	ITGA7	1.2047
ENSGALT00000058133	MFSD1	6.23292	ENSGALT00000039991	XYLT1	2.17126	ENSGALT00000073829	RUNX1T1	8.78874				ENSGALT00000017087	INPP5A	2.98434				ENSGALT00000010333	OSBPL5	11.5091	ENSGALT00000022297	DLC1	1.65358	ENSGALT00000025796	ENSGALG00000016011	1.1063	ENSGALT00000051874	CAMSAP2	2.6645
ENSGALT00000059741	STX8	5.56935	ENSGALT00000040550	PI4KB	3.87873	ENSGALT00000074029	CRTAC1	6.20409				ENSGALT00000017109	BEND5	2.36487				ENSGALT00000010476	TCF7	6.91787	ENSGALT00000022595	PDE7B	2.45125	ENSGALT00000026596	HS1BP3	4.45	ENSGALT00000052341	CD8A	2.63462
ENSGALT00000060155	CFAP126	7.59864	ENSGALT00000042995	ENSGALG00000028210	2.25355	ENSGALT00000074219	TBC1D12	10.7216				ENSGALT00000017236	TET2	2.48296				ENSGALT00000010527	BSX	17.8637	ENSGALT00000023595	GOLPH3L	1.5146	ENSGALT00000026692	ENSGALG00000016541	2.19238	ENSGALT00000053719	LOXHD1	1.87302
ENSGALT00000060296	BTK	6.81015	ENSGALT00000043367	OTOL1	3.20902	ENSGALT00000075525	CDK5RAP3	7.48963				ENSGALT00000017407	ADSS	3.10842				ENSGALT00000011010	PLSCR5	10.4616	ENSGALT00000023851	MAST4	1.83868	ENSGALT00000027745	MSANTD4	3.67303	ENSGALT00000054243	MYBPC1	1.41507
ENSGALT00000062131	GRK6	24.2614	ENSGALT00000043553	LRIT3	2	ENSGALT00000076806	TERT	7.59558				ENSGALT00000017803	LIN7A	1.08174				ENSGALT00000011341	ENSGALG00000007007	15.3172	ENSGALT00000023895	ATP6V1A	1.27097	ENSGALT00000031497	ENSGALG00000019824	8.75242	ENSGALT00000055498	WWP2	1.34141
ENSGALT00000064309	SHKBP1	4.35044	ENSGALT00000044179	ENSGALG00000028681	5.74089	ENSGALT00000078228	NR3C2	10.7809				ENSGALT00000017871	SPIA4	3.78313				ENSGALT00000011695	OSTN	7.08561	ENSGALT00000023977	ADCYAP1	2.54958	ENSGALT00000033236	RHO	1.28992	ENSGALT00000057176	HECW1	4.51769
ENSGALT00000066382	CRYZL1	10.1385	ENSGALT00000044184	MYF5	4.70448	ENSGALT00000079465	TRAF7	7.70706				ENSGALT00000018329	OXNAD1	2.13684				ENSGALT00000012322	BTG4	310.063	ENSGALT00000023981	NIM1K	1.78282	ENSGALT00000033511	CRYGS	4.32222	ENSGALT00000057231	ENSGALG00000021025	1.24336
ENSGALT00000066530	AKAP12	6.32943	ENSGALT00000044744	LRTM2	2.22498	ENSGALT00000081705	MSL3	10.8818				ENSGALT00000018958	ENSGALG00000011608	9.24617				ENSGALT00000012536	RTN4R	5.55648	ENSGALT00000024619	PAM	2.64913	ENSGALT00000033784	CGNRH-R	1.69608	ENSGALT00000060805	ENSGALG00000051751	7.30296
ENSGALT00000066891	TMEM52B	4.92862	ENSGALT00000046319	DOCK8	1.90826	ENSGALT00000083604	ASIP	15.172				ENSGALT00000018987	MAS1	1.37374				ENSGALT00000012751	PAPOLG	29.9371	ENSGALT00000024876	NRG1	6.78281	ENSGALT00000034111	CFAP161	5.4093	ENSGALT00000062279	DLGAP1	1.95379
ENSGALT00000068310	PFKFB3	17.7769	ENSGALT00000046917	FAM184A	2.01009	ENSGALT00000084948	NRG1	8.05015				ENSGALT00000019175	ART4	1.79135				ENSGALT00000013051	CORO2B	14.9941	ENSGALT00000024902	SLC44A1	2.85479	ENSGALT00000034365	PLA2G10	1.47891	ENSGALT00000063864	ENSGALG00000032501	1.92554
ENSGALT00000068430	ENAH	8.34296	ENSGALT00000047432	ITGA7	1.68998	ENSGALT00000085861	DAAM1	41.817				ENSGALT00000019656	TAAR2	1.58018				ENSGALT00000013063	MTMR3	17.9908	ENSGALT00000025017	KLHL32	2.59621	ENSGALT00000034822	EXOC7	4.53466	ENSGALT00000065491	ENSGALG00000038579	14.5553
ENSGALT00000069356	ENSGALG00000042748	1.91493	ENSGALT00000047491	ANK3	6.87765	ENSGALT00000086898	HACE1	6.90289				ENSGALT00000020403	ENSGALG00000012490	4.66132				ENSGALT00000013070	SYT13	3.77393	ENSGALT00000026153	NDP	3.90604	ENSGALT00000036870	WDR35	3.08172	ENSGALT00000065912	GABRG2	1.60587
ENSGALT00000071428	NCOA6	5.65396	ENSGALT00000047593	SCAF11	15.7368	ENSGALT00000086954	VDAC2	6.31016				ENSGALT00000020586	DAPK1	1.72454				ENSGALT00000013245	SRPK2	34.831	ENSGALT00000026323	GCM1	1.3059	ENSGALT00000038716	RBM33	1.17265	ENSGALT00000068075	KRT75	1.69576
ENSGALT00000071466	MTFR1L	4.3993	ENSGALT00000047638	ZEB2	2.05863	ENSGALT00000088354	ENSGALG00000035086	405.467				ENSGALT00000021428	CAPZA3	1.22211				ENSGALT00000013480	CYP2AB1	71.5986	ENSGALT00000027027	GABRA5	3.6534	ENSGALT00000039674	SH2D6	1.1584	ENSGALT00000068560	DGKB	1.04662
ENSGALT00000071872	M6PR	6.69064	ENSGALT00000048397	DCLK2	2.33832	ENSGALT00000089462	CCDC58	13.1711				ENSGALT00000022225	ENSGALG00000052035	1.98321				ENSGALT00000013878	EIF4G1	17.5641	ENSGALT00000027071	AFF3	2.45748	ENSGALT00000041403	ENSGALG00000024490	45.7576	ENSGALT00000068826	KCNH7	1.20914
ENSGALT00000071948	ENSGALG00000042606	4.9233	ENSGALT00000049008	COX20	2.32438	ENSGALT00000090941	COL25A1	7.13305				ENSGALT00000022522	MAP3K5	1.07065				ENSGALT00000013911	KLHDC3	9.73144	ENSGALT00000027119	FHL2	4.23637	ENSGALT00000042752	ENSGALG00000027002	1.13814	ENSGALT00000069052	RGS3	7.65376
ENSGALT00000078635	ENSGALG00000034504	9.21253	ENSGALT00000049196	OLIG2	5.79524	ENSGALT00000091472	ENSGALG00000047773	10.5478				ENSGALT00000023816	HAO2	1.75325				ENSGALT00000014074	ENSGALG00000008635	65.9633	ENSGALT00000027246	FGF14	1.80643	ENSGALT00000043098	FARP1	8.02383	ENSGALT00000069448	COLEC10	1.03872
ENSGALT00000079156	CSDC2	5.15078	ENSGALT00000049208	ENSGALG00000035017	2.69927	ENSGALT00000092806	ENSGALG00000055019	6.53155				ENSGALT00000023927	VTCN1	2.2214				ENSGALT00000014968	ENSGALG00000024138	30.6223	ENSGALT00000027850	FAT3	1.5522	ENSGALT00000044084	GPHB5	1.58974	ENSGALT00000070446	TNNT2	15.3966
ENSGALT00000079430	CAMK2B	6.53153	ENSGALT00000051204	FSTL4	2.07187	ENSGALT00000093883	ENSGALG00000053247	7.82671				ENSGALT00000024518	SLC35A5	1.11342				ENSGALT00000015139	EMX2	229.606	ENSGALT00000031464	KCNH6	6.35283	ENSGALT00000045088	ART7C	7.12482	ENSGALT00000070906	YPEL4	1.40061
ENSGALT00000080672	RNF128	6.02473	ENSGALT00000051383	MYO18A	6.51089	ENSGALT00000093992	SMPX	6.2794				ENSGALT00000024563	ENSGALG00000015219	5.6697				ENSGALT00000015461	NPY1R	46.112	ENSGALT00000031839	TCTE3	2.42684	ENSGALT00000045427	OPA1	1.06641	ENSGALT00000073800	DRGX	2.53103
ENSGALT00000081090	CCDC89	5.86381	ENSGALT00000052505	PTPRD	2.11173	ENSGALT00000094442	LGALS2	46.6941				ENSGALT00000024587	PPIL6	4.19907				ENSGALT00000016598	CAPS2	5.89178	ENSGALT00000032690	CRACR2B	3.16716	ENSGALT00000045466	SKAP1	5.48232	ENSGALT00000073906	CD4	6.55337
ENSGALT00000081418	WDR31	7.51163	ENSGALT00000053047	BBS9	10.5683	ENSGALT00000095047	PKNOX1	6.16133				ENSGALT00000025170	CASP8AP2	1.13869				ENSGALT00000016903	SLC30A2	6.26752	ENSGALT00000033544	ENSGALG00000020906	1.25862	ENSGALT00000045632	MOB3C	2.83999	ENSGALT00000074150	ENSGALG00000050055	2.42484
ENSGALT00000081575	LHFPL3	10.4985	ENSGALT00000053140	ENSGALG00000038896	2.78504	ENSGALT00000095365	ABCC5	45.4061				ENSGALT00000025300	ENSGALG00000015687	19.1279				ENSGALT00000017229	GNOT2	181.968	ENSGALT00000035146	MXRA8	1.25107	ENSGALT00000045724	PLEKHG5	1.3215	ENSGALT00000074563	MYT1	1.5758
ENSGALT00000081827	PPRC1	7.61417	ENSGALT00000054993	TLK1	7.19527	ENSGALT00000095433	ENSGALG00000053382	20.475				ENSGALT00000025731	FAM135A	2.06703				ENSGALT00000017246	TACR3	8.96557	ENSGALT00000038526	PARD3	3.5948	ENSGALT00000047301	ALKBH2	2.0337	ENSGALT00000074581	WDSUB1	14.4474
ENSGALT00000081840	TWIST3	10.0757	ENSGALT00000055214	CWH43	10.8743	ENSGALT00000097773	CEP44	13.1462				ENSGALT00000025834	DOP1B	1.57933				ENSGALT00000017341	ENSGALG00000010657	60.694	ENSGALT00000038691	HOXD4	3.30422	ENSGALT00000047643	TANGO6	1.14453	ENSGALT00000075176	ENSGALG00000005204	6.3966
ENSGALT00000082930	WAPL	5.69217	ENSGALT00000055964	PRKCD	2.5242	ENSGALT00000098744	ENSGALG00000052152	7.56249				ENSGALT00000025846	CLDN14	1.57203				ENSGALT00000017449	ENSGALG00000010722	11.525	ENSGALT00000038692	HOXD3	2.62982	ENSGALT00000049161	STXBP3	2.75955	ENSGALT00000076167	TOP2A	2.58435
ENSGALT00000083094	RNF121	6.49965	ENSGALT00000056368	MAPK8IP3	2.61897	ENSGALT00000099017	PTPRS	18.8131				ENSGALT00000026261	IL1RAPL1	1.07855				ENSGALT00000017864	ENSGALG00000020390	22.4803	ENSGALT00000039364	CDC42BPA	3.75842	ENSGALT00000049691	ZNF618	2.24422	ENSGALT00000076955	ENSGALG00000020921	1.44049
ENSGALT00000085169	ENSGALG00000019554	5.46074	ENSGALT00000056540	HOXC10	4.26736	ENSGALT00000099264	ENSGALG00000047117	0.447545				ENSGALT00000026377	ACOT9	1.73368				ENSGALT00000018002	SLC38A11	29.5231	ENSGALT00000039757	PCDH19	1.50686	ENSGALT00000050362	HMCN1	1.49713	ENSGALT00000077007	ENSGALG00000041225	3.62159
ENSGALT00000088704	EGR3	45.7138	ENSGALT00000057414	CREB5	1.66172	ENSGALT00000099987	SLC44A3	9.87865				ENSGALT00000026573	MSGN1	2.13007				ENSGALT00000018324	GALNT15	7.88531	ENSGALT00000042636	ENSGALG00000028222	2.7609	ENSGALT00000050706	ZNF609	57.5258	ENSGALT00000079315	PAX1	10.6738
ENSGALT00000090357	ENSGALG00000045876	4.02377	ENSGALT00000058485	INTS3	2.48059	ENSGALT00000100265	CAND1	6.46045				ENSGALT00000026798	EFR3B	1.64777				ENSGALT00000018341	DAZL	82.2451	ENSGALT00000043136	CRLF1	1.2531	ENSGALT00000050784	GRK3	1.25652	ENSGALT00000079683	OVALY	1.18593
ENSGALT00000090847	FCHO1	8.37469	ENSGALT00000058650	ENSGALG00000039159	2	ENSGALT00000100410	AP1S3	6.99898				ENSGALT00000027102	IL1RL1	2.15584				ENSGALT00000018621	ENSGALG00000011413	10.5904	ENSGALT00000044176	FGF9	1.83699	ENSGALT00000050853	HIC2	2.6143	ENSGALT00000083315	ANGEL2	2.75201
ENSGALT00000091603	ENSGALG00000053380	5.86393	ENSGALT00000059753	ANKRD27	2.5954	ENSGALT00000101123	SUSD2	9.17534				ENSGALT00000027420	CCDC122	9.33823				ENSGALT00000018729	XRCC5	5.38565	ENSGALT00000045378	TPM2	1.71209	ENSGALT00000051481	ENSGALG00000048749	2.64556	ENSGALT00000084050	ENSGALG00000030007	17.2206
ENSGALT00000091618	FHL1	4.8003	ENSGALT00000060108	GNAO1	2.63656	ENSGALT00000101486	MSRB3	44.2841				ENSGALT00000027441	CPB2	2.70874				ENSGALT00000019262	GSG1	5.49046	ENSGALT00000045589	HS3ST5	2.0873	ENSGALT00000052159	BICC1	1.31513	ENSGALT00000084355	ENSGALG00000045073	1.45971
ENSGALT00000092026	ENSGALG00000007193	6.07172	ENSGALT00000060514	HSP90AB1	1.97858	ENSGALT00000103006	ZFC3H1	12.6318				ENSGALT00000027810	SESN3	1.42145				ENSGALT00000019839	TBPL2	52.2125	ENSGALT00000046658	RASAL2	1.85048	ENSGALT00000052324	NRCAM	1.1131	ENSGALT00000084906	ENSGALG00000054027	2.41985
ENSGALT00000092216	ENSGALG00000051010	5.86857	ENSGALT00000061113	APBB1IP	1.81361	ENSGALT00000103569	AXIN1	6.28456				ENSGALT00000027885	ANKRD42	3.55518				ENSGALT00000019847	METTL15P1	5.05691	ENSGALT00000046681	OXR1	1.36825	ENSGALT00000052797	ADGRL2	2.41429	ENSGALT00000085789	ENSGALG00000047324	1.0719
ENSGALT00000093380	SAMD14	4.18621	ENSGALT00000061317	SLC7A3	1.65917	ENSGALT00000103673	SLC38A8	7.7207				ENSGALT00000027945	ENSGALG00000017290	1.47984				ENSGALT00000020095	GRM1	261.386	ENSGALT00000047196	KIAA1324	4.35241	ENSGALT00000053213	COBLL1	1.10017	ENSGALT00000086014	ENSGALG00000054264	1.73161
ENSGALT00000093726	ENSGALG00000013101	4.82031	ENSGALT00000061479	RPL21	1.69151	ENSGALT00000104070	AAGAB	6.71697				ENSGALT00000030002	ENSGALG00000019018	4.3615				ENSGALT00000020737	RNF182	12.9831	ENSGALT00000047522	NRXN1	1.54697	ENSGALT00000053720	WDR61	1.82203	ENSGALT00000086747	ENSGALG00000026015	1.25081
ENSGALT00000094264	ENSGALG00000048223	8.43149	ENSGALT00000062040	STARD3	6.62791	ENSGALT00000104764	KCNIP4	7.81044				ENSGALT00000030017	ENSGALG00000019030	1.32191				ENSGALT00000020834	GCM2	27.3043	ENSGALT00000047839	PRKAG1	3.01025	ENSGALT00000053932	ENSGALG00000051054	2.61313	ENSGALT00000086913	CTSE	3.77108
ENSGALT00000094482	CAPN14	4.93485	ENSGALT00000062837	HMGB1	1.67752	ENSGALT00000105547	ENSGALG00000049411	6.9326				ENSGALT00000031354	ART7B	2.08758				ENSGALT00000021117	CAPRIN2	113.737	ENSGALT00000048111	UACA	2.15961	ENSGALT00000054019	ENSGALG00000015531	1.7499	ENSGALT00000087385	ENSGALG00000045228	49.6088
ENSGALT00000094522	SLC5A10	9.66416	ENSGALT00000063018	ENSGALG00000014066	3.76132	ENSGALT00000106283	APOF	9.60666				ENSGALT00000031399	ENSGALG00000054001	1.34314				ENSGALT00000021382	SLC15A5	97.0024	ENSGALT00000048322	ADGRL2	1.92864	ENSGALT00000054395	ZER1	1.3781	ENSGALT00000090131	ENSGALG00000044962	1.54239
ENSGALT00000094606	RNF34	4.75121	ENSGALT00000063605	CNTN1	2.01635	ENSGALT00000107634	DLL1	9.43229				ENSGALT00000031400	ENSGALG00000054042	1.74286				ENSGALT00000021554	IRX2	22.458	ENSGALT00000048550	CDH20	3.02635	ENSGALT00000054516	ENSGALG00000043758	1.14065	ENSGALT00000090366	TMEM5	5.57143
ENSGALT00000094830	TSPAN18	9.22829	ENSGALT00000065242	MSX2	2.24772	ENSGALT00000107872	CACNA1C	17.0814				ENSGALT00000033279	EVX2	2.84109				ENSGALT00000021599	CLEC3A	5.6593	ENSGALT00000048620	ENSGALG00000037242	2.71733	ENSGALT00000054671	DMP1	1.515	ENSGALT00000090397	DLG3	1.10938
ENSGALT00000095101	DAB2IP	5.75289	ENSGALT00000066157	EVX1	1.6224							ENSGALT00000033573	NRROS	1.11074				ENSGALT00000021629	ENSGALG00000013247	5.53709	ENSGALT00000048710	NRCAM	1.45632	ENSGALT00000057326	CARD10	1.47225	ENSGALT00000090604	UBXN2B	1.44315
ENSGALT00000095387	ENSGALG00000048372	6.73725	ENSGALT00000066347	TBC1D5	2.00037							ENSGALT00000033625	AGXT	1.88889				ENSGALT00000021697	C4orf47	9.96219	ENSGALT00000048931	ZMYND12	1.29977	ENSGALT00000057355	NHS	2.89842	ENSGALT00000090701	ENSGALG00000054069	8.41164
ENSGALT00000095429	ENSGALG00000027983	5.89683	ENSGALT00000066408	SLC44A5	13.9483							ENSGALT00000034106	PAQR9	2.48958				ENSGALT00000022223	FGF20	68.6091	ENSGALT00000049012	VSTM2A	1.41385	ENSGALT00000057473	REV3L	1.29131	ENSGALT00000091009	MEF2C	1.35958
ENSGALT00000095662	ZPLD1	9.57473	ENSGALT00000067000	HOXB13	41.9549							ENSGALT00000036719	AvBD9	10.9358				ENSGALT00000022228	ENSGALG00000013668	6.70219	ENSGALT00000049435	EPB41L1	2.89295	ENSGALT00000057519	LZIC	1.13094	ENSGALT00000091160	IL1RAPL2	1.91507
ENSGALT00000096187	ENSGALG00000012394	5.78155	ENSGALT00000067312	ODF2L	3.39297							ENSGALT00000037720	TBP	4.40901				ENSGALT00000022382	CDH7	10.3934	ENSGALT00000049498	ADGRB2	2.03008	ENSGALT00000057748	FAM105A	3.85579	ENSGALT00000092046	ENSGALG00000052476	2.07011
ENSGALT00000096811	RARG	10.5847	ENSGALT00000069231	UNC5D	1.11763							ENSGALT00000037748	RARB	1.50256				ENSGALT00000022974	GABRA2	20.7321	ENSGALT00000049711	NRXN1	1.39129	ENSGALT00000058112	PCSK2	7.72619	ENSGALT00000092414	ENSGALG00000046988	1.60396
ENSGALT00000096906	ENSGALG00000050896	14.5908	ENSGALT00000069929	EXD1	1.69643							ENSGALT00000037978	MYLK	4.5226				ENSGALT00000023006	SMC1B	6.69515	ENSGALT00000049799	ENSGALG00000009959	1.49045	ENSGALT00000059211	RIC1	1.28018	ENSGALT00000092537	ENSGALG00000050091	3.39352
ENSGALT00000097689	ATP13A2	8.22168	ENSGALT00000070018	NFYB	1.84745							ENSGALT00000038151	STRA8	2.21642				ENSGALT00000023811	ENSGALG00000014762	52.7966	ENSGALT00000049874	GRIA3	1.38729	ENSGALT00000060221	ENSGALG00000031327	1.19337	ENSGALT00000092548	KCNH4	8.27976
ENSGALT00000098026	MROH1	4.28765	ENSGALT00000070132	REV1	3.1361							ENSGALT00000038838	ODF2L	1.05927				ENSGALT00000024133	ENSGALG00000014965	7.59109	ENSGALT00000050168	NRXN1	2.04919	ENSGALT00000061238	CAPZB	1.08346	ENSGALT00000092863	GALNT13	1.37916
ENSGALT00000098066	CALCRL	7.2822	ENSGALT00000070954	NFYC	3.13148							ENSGALT00000039165	MYO19	2.71849				ENSGALT00000024411	TRPM3	14.2424	ENSGALT00000051049	GSG1L2	1.80091	ENSGALT00000061575	SRGAP3	1.13949	ENSGALT00000093371	PLCXD1	2.19577
ENSGALT00000098457	LPXN	4.23868	ENSGALT00000071239	MVB12B	2.58087							ENSGALT00000039184	LSP1P1	2.19539				ENSGALT00000024454	OPN5L1	7.1746	ENSGALT00000051367	CLCF1	5.91755	ENSGALT00000061657	PLPPR1	1.59076	ENSGALT00000094245	ENSGALG00000054636	3.7609
ENSGALT00000098651	ENSGALG00000052270	4.77644	ENSGALT00000073377	RAB25	5.90653							ENSGALT00000040006	ZNF488	1.3642				ENSGALT00000024893	GRIK2	1.5448	ENSGALT00000051371	TRAPPC5	46.8351	ENSGALT00000061823	SRC	1.83235	ENSGALT00000095135	ASMT	1.34873
ENSGALT00000100076	GOLGA1	6.85174	ENSGALT00000073474	CELSR2	2.72154							ENSGALT00000041052	IL12B	1.11384				ENSGALT00000024939	SIM1	1.0665	ENSGALT00000051623	ST3GAL6	1.44934	ENSGALT00000063159	ARSK	1.67145	ENSGALT00000095332	ENSGALG00000052025	1.14379
ENSGALT00000100201	MBTD1	6.8985	ENSGALT00000074788	SHOC1	1.26687							ENSGALT00000042634	SEMA3A	2.20932				ENSGALT00000025547	RIPPLY2	16.5075	ENSGALT00000051668	OSBPL1A	2.03796	ENSGALT00000063878	KLHL12	1.09247	ENSGALT00000095409	ADAM11	1.31931
ENSGALT00000100227	RPS6KL1	4.30755	ENSGALT00000074999	DNAJC15	3.13357							ENSGALT00000043071	TMCO3	2.76848				ENSGALT00000026566	ZPAX	57.3957	ENSGALT00000051855	AKAP6	2.26749	ENSGALT00000064180	ENSGALG00000037200	1.50653	ENSGALT00000096017	ENSGALG00000049417	0.018574
ENSGALT00000100278	ENSGALG00000047708	8.02394	ENSGALT00000075830	RAD18	1.78662							ENSGALT00000043296	ENSGALG00000028466	5.5335				ENSGALT00000026603	TDRD15	38.8977	ENSGALT00000052132	AFAP1	1.97537	ENSGALT00000065201	ARHGAP26	2.53287	ENSGALT00000096326	FBXO40	16.1163
ENSGALT00000100322	EVI5L	12.0437	ENSGALT00000076507	DDX25	5.3769							ENSGALT00000044111	ENSGALG00000052795	1.74286				ENSGALT00000026650	ZNF513	56.8225	ENSGALT00000052752	ARAP2	1.28036	ENSGALT00000067396	QSOX2	1.21921	ENSGALT00000096497	SUSD3	1.28595
ENSGALT00000100631	LRRC10	4.83936	ENSGALT00000076525	ENSGALG00000036511	1.66777							ENSGALT00000044625	ENSGALG00000026952	2.96357				ENSGALT00000026758	OTOF	2.86434	ENSGALT00000053131	CKB	62.7363	ENSGALT00000068470	KIF21A	7.23247	ENSGALT00000097556	PDZK1	1.30527
ENSGALT00000101111	ENSGALG00000034737	8.44217	ENSGALT00000076659	XPO7	1.63501							ENSGALT00000045110	ENSGALG00000029040	2.64493				ENSGALT00000026845	EXTL3	7.89493	ENSGALT00000053317	SORBS2	1.74331	ENSGALT00000069078	MICAL2	2.71218	ENSGALT00000097878	HTD2	1.67712
ENSGALT00000101532	OSBP2	11.2882	ENSGALT00000077356	ASB10	2.00066							ENSGALT00000045948	CTTNBP2NL	0.453131				ENSGALT00000026902	AvBD3	8.6399	ENSGALT00000054022	MPPED1	3.29955	ENSGALT00000069562	NEBL	7.41882	ENSGALT00000098315	ENSGALG00000053547	1.71765
ENSGALT00000101905	BID	5.08041	ENSGALT00000077925	BAZ1B	3.84885							ENSGALT00000046087	ENSGALG00000028041	1.03248				ENSGALT00000027076	ENSGALG00000016770	207.863	ENSGALT00000054406	IFT43	3.12298	ENSGALT00000069912	TBC1D1	1.10121	ENSGALT00000098658	MCM10	2.5113
ENSGALT00000101948	DALRD3	4.31972	ENSGALT00000078912	HOXD13	8.50076							ENSGALT00000046160	CTXN3	1.28901				ENSGALT00000027077	ENSGALG00000016771	284.456	ENSGALT00000054646	PPFIA2	4.27144	ENSGALT00000069949	ARHGEF10L	8.64652	ENSGALT00000099124	CACNB4	4.96912
ENSGALT00000102062	KANSL3	8.27104	ENSGALT00000079601	GKAP1	1.83419							ENSGALT00000046604	ENSGALG00000034308	2.74182				ENSGALT00000027328	KLHL1	2.13188	ENSGALT00000054780	ENSGALG00000040371	1.86697	ENSGALT00000070943	IBTK	1.89977	ENSGALT00000099543	PPP1R14B	274.04
ENSGALT00000102767	OTUD7B	4.36144	ENSGALT00000080031	THOC2	3.76793							ENSGALT00000047140	ENSGALG00000031624	2.10113				ENSGALT00000027358	COMMD6	13.6171	ENSGALT00000054855	SYCE3	1.97948	ENSGALT00000071498	OGDH	1.50371	ENSGALT00000100315	MYPN	1.78902
ENSGALT00000103736	ENSGALG00000049317	27.1479	ENSGALT00000081588	DHRS7C	2.40971							ENSGALT00000047209	TAS2R4	1.33333				ENSGALT00000027775	C1H11ORF70	25.4723	ENSGALT00000055004	DLGAP1	1.30798	ENSGALT00000071548	ENSGALG00000040182	1.23945	ENSGALT00000100386	ENSGALG00000048786	8.95902
ENSGALT00000104305	DENND5A	7.77205	ENSGALT00000083411	ENSGALG00000043998	3.2217							ENSGALT00000047356	HSD17B4	1.53575				ENSGALT00000028011	KLHL35	34.2395	ENSGALT00000055364	NFASC	1.98788	ENSGALT00000072016	SFXN1	3.13769	ENSGALT00000100490	LPXN	7.07973
ENSGALT00000105092	MGLL	5.58521	ENSGALT00000084159	MCM5	2.40888							ENSGALT00000047362	VPS39	2.62392				ENSGALT00000028025	FOLR1	260.257	ENSGALT00000055549	GRIA3	2.23324	ENSGALT00000072453	PHIP	1.1699	ENSGALT00000100675	ENSGALG00000038254	2
ENSGALT00000105322	TOM1L2	7.04192	ENSGALT00000084513	SAMD11	9.97848							ENSGALT00000047552	SCNN1G	3.07229				ENSGALT00000028080	SPDYA	5.74882	ENSGALT00000056309	DLGAP2	1.38762	ENSGALT00000072540	TRABD	1.14331	ENSGALT00000100864	RALY	1.47196
ENSGALT00000105583	ARID1B	4.81322	ENSGALT00000084658	SPAST	2.07792							ENSGALT00000047807	NDEL1	1.96512				ENSGALT00000029975	UNC5A	8.88561	ENSGALT00000056643	WNT8A	2.45779	ENSGALT00000073163	SPAG9	7.63746	ENSGALT00000101235	ENSGALG00000046694	1.07684
ENSGALT00000105656	ENSGALG00000045534	4.71377	ENSGALT00000084713	TPX2	2.85218							ENSGALT00000047925	ENSGALG00000034144	9.28618				ENSGALT00000030591	ENSGALG00000019312	23.8597	ENSGALT00000056659	PRLR	1.39679	ENSGALT00000073518	SMPD4	1.09127	ENSGALT00000101340	TK2	17.0829
ENSGALT00000105852	ENSGALG00000054562	20.5062	ENSGALT00000084844	ST7	5.01438							ENSGALT00000048379	CD2AP	1.92167				ENSGALT00000031711	ENSGALG00000019934	6.36207	ENSGALT00000057250	NOV	4.37997	ENSGALT00000074087	KCTD7	1.75767	ENSGALT00000101645	ENSGALG00000046637	1.31587
ENSGALT00000105926	HACE1	5.58871	ENSGALT00000085217	NMRK2	8.55645							ENSGALT00000048408	CEP131	2.41492				ENSGALT00000032639	ENSGALG00000045796	6.90141	ENSGALT00000057931	NRXN1	2.17853	ENSGALT00000074103	ARL15	8.19305	ENSGALT00000101826	ING2	1.66739
ENSGALT00000106210	SCN4A	8.60327	ENSGALT00000087121	RWDD1	6.64231							ENSGALT00000048514	ENSGALG00000031167	2.90754				ENSGALT00000033172	CYP17A1	3604.7	ENSGALT00000057965	SMARCA2	2.83233	ENSGALT00000074134	CLVS1	5.48141	ENSGALT00000101840	CRISP2	4.96537
ENSGALT00000107786	GART	4.78795	ENSGALT00000087248	PGLYRP2	1.64989							ENSGALT00000048993	WNT7B	1.85349				ENSGALT00000033214	FGF8	85.6806	ENSGALT00000058328	DBH	2.31884	ENSGALT00000074365	SPATA6	1.41581	ENSGALT00000101996	ENSGALG00000050205	1.84462
ENSGALT00000107883	ENSGALG00000037029	7.15076	ENSGALT00000087430	PCDH15	3.05554							ENSGALT00000050094	DARS	2.12641				ENSGALT00000033719	FAM163A	16.0167	ENSGALT00000058712	MYO1A	5.91734	ENSGALT00000074378	PHF20	4.42626	ENSGALT00000102469	NEU2	1.97235
ENSGALT00000107901	ENSGALG00000051737	8.23477	ENSGALT00000087557	ENSGALG00000044733	5.92164							ENSGALT00000050280	CYP17A1	1.17717				ENSGALT00000034137	ENSGALG00000021198	45.8914	ENSGALT00000059150	BEND4	1.38388	ENSGALT00000077414	FGF1	3	ENSGALT00000102577	NTRK1	1.77943
			ENSGALT00000087606	ENSGALG00000051284	2.03011							ENSGALT00000050398	ANKRD13B	2.20512				ENSGALT00000034893	ENSGALG00000021561	14.8731	ENSGALT00000059499	NRXN3	1.82431	ENSGALT00000077689	MEAF6	2.01683	ENSGALT00000102739	EPHA5	2.81805
			ENSGALT00000087671	HOXD12	6.97492							ENSGALT00000050484	LHFPL5	1.281				ENSGALT00000035097	NRTN	35.1473	ENSGALT00000059925	ENSGALG00000002099	1.85983	ENSGALT00000077724	CNOT10	1.21736	ENSGALT00000102765	NAP1L4	2.06763
			ENSGALT00000087678	MRPL39	2.32366							ENSGALT00000050498	PKNOX1	2.28791				ENSGALT00000036155	NFE2L1	6.61154	ENSGALT00000060956	RAP1GAP2	9.76637	ENSGALT00000077930	SYNCRIP	1.03314	ENSGALT00000104178	KCNQ3	1.09988
			ENSGALT00000087814	QARS	1.90173							ENSGALT00000050993	ENSGALG00000038579	1.33333				ENSGALT00000036981	IRX4	17.8782	ENSGALT00000061883	KCNC4	1.13484	ENSGALT00000078751	UBE2D1	1.35405	ENSGALT00000104467	SRCIN1	1.14015
			ENSGALT00000087872	RPL17	1.69377							ENSGALT00000051920	SLC9A9	1.12694				ENSGALT00000037814	EPHA5	8.66938	ENSGALT00000061959	KIF23	3.35377	ENSGALT00000080314	PARD3	1.04891	ENSGALT00000104550	PPP1R10	3.47889
			ENSGALT00000088351	CDK1	2.65731							ENSGALT00000051998	ENSGALG00000015531	1.22475				ENSGALT00000038301	SPATA6	7.07755	ENSGALT00000062501	ENSGALG00000005861	1.59074	ENSGALT00000080514	DLGAP4	2.55981	ENSGALT00000104567	GCN1	2.92556
			ENSGALT00000088655	CRLF3	4.34904							ENSGALT00000052418	CEP135	4.72776				ENSGALT00000038558	ENSGALG00000005778	6.80769	ENSGALT00000062849	SMOC1	1.45073	ENSGALT00000081343	UTRN	1.61249	ENSGALT00000104719	FBXO41	4.5653
			ENSGALT00000088903	RPP40	2.57496							ENSGALT00000052766	SPON1	2.17431				ENSGALT00000039389	RSPO4	23.3127	ENSGALT00000062914	SLC38A4	2.84331	ENSGALT00000081763	ARL6	3.3773	ENSGALT00000105477	GOLGA7B	1.43944
			ENSGALT00000089283	KCNMA1	4.3104							ENSGALT00000052880	AMPD2	1.62421				ENSGALT00000039785	PIFO	8.0189	ENSGALT00000063103	PTCH2	2.08874	ENSGALT00000082731	ENSGALG00000026152	3.24464	ENSGALT00000106002	SAMD14	1.71346
			ENSGALT00000090122	ENSGALG00000043896	3							ENSGALT00000053098	RNGTT	6.87245				ENSGALT00000039923	IL4	46.9319	ENSGALT00000063386	MAST4	3.34912	ENSGALT00000082958	MTMR3	1.01732	ENSGALT00000106276	ENSGALG00000050822	4.71
			ENSGALT00000090625	MAPK13	2.67788							ENSGALT00000053871	XRCC6	1.08377				ENSGALT00000040483	CAMK2A	8.36747	ENSGALT00000063676	SYT9	5.16508	ENSGALT00000083155	ENSGALG00000014754	20.7804	ENSGALT00000106365	PDZK1	2.80705
			ENSGALT00000091170	NT5C2	7.18184							ENSGALT00000054469	PNPLA7	2.4225				ENSGALT00000040658	ENSGALG00000024085	14.7015	ENSGALT00000064440	TBX20	1.58491	ENSGALT00000083172	ARF1	1.068	ENSGALT00000106777	FBXO41	1.38278
			ENSGALT00000091217	ENSGALG00000053594	9.2648							ENSGALT00000054522	PDP1	2.44334				ENSGALT00000041178	LRIT2	9.19274	ENSGALT00000065886	SLC39A12	1.71938	ENSGALT00000083276	SIAH1	1.67263	ENSGALT00000106877	APBB3	2.16753
			ENSGALT00000091533	TTK	2.06648							ENSGALT00000054773	EIF2B5	3.605				ENSGALT00000042669	ENSGALG00000028815	2.13114	ENSGALT00000065973	AGRN	1.31112	ENSGALT00000083453	EXOC2	1.02653	ENSGALT00000107277	ENSGALG00000046694	1.59805
			ENSGALT00000091702	PLXND1	1.60726							ENSGALT00000054851	ENSGALG00000054026	2.20251				ENSGALT00000042774	RGS8	3.66929	ENSGALT00000066810	ST8SIA3Z	2.77614	ENSGALT00000083758	SETD3	3.45034	ENSGALT00000107391	HES2	1.15333
			ENSGALT00000091707	ENSGALG00000053025	1.63384							ENSGALT00000055080	ENSGALG00000029868	1.40882				ENSGALT00000043073	CRNN	5.1609	ENSGALT00000066852	NPAS2	6.77175	ENSGALT00000083977	ENSGALG00000048572	1.5608	ENSGALT00000108346	SH3PXD2A	1.07398
			ENSGALT00000091864	APBB1	2.59969							ENSGALT00000055780	BRD1	2.28641				ENSGALT00000043077	ENSGALG00000028895	6.04677	ENSGALT00000067041	PARD3	1.26537	ENSGALT00000084309	UBE2N	1.33755
			ENSGALT00000092028	SACS	19.8027							ENSGALT00000056028	ENSGALG00000030576	1.99661				ENSGALT00000043459	GHSR	9.97592	ENSGALT00000067177	ENSGALG00000037671	1.83197	ENSGALT00000084690	NFYC	2.45356
			ENSGALT00000092521	TDRD1	2.48433							ENSGALT00000056488	CEL	1.21622				ENSGALT00000043835	ENSGALG00000027887	16.0774	ENSGALT00000067434	NRXN1	2.02544	ENSGALT00000084693	DPH5	1.89158
			ENSGALT00000092554	GSAP	3.34535							ENSGALT00000056728	SLC35D3	2.26681				ENSGALT00000043921	PDE6H	5.24225	ENSGALT00000069072	CLTCL1	2.57672	ENSGALT00000085518	ENSGALG00000014754	1.61894
			ENSGALT00000092720	TMEM63B	3.19898							ENSGALT00000057343	CLASP1	1.06204				ENSGALT00000044008	NHLH1	6.53707	ENSGALT00000069582	PYROXD2	1.9523	ENSGALT00000085938	ENSGALG00000047240	1.20219
			ENSGALT00000092834	AIFM3	2.32658							ENSGALT00000057377	GDPD5	1.67058				ENSGALT00000044024	CCNO	587.944	ENSGALT00000069664	GLI2	2.55758	ENSGALT00000086480	KATNBL1	1.45664
			ENSGALT00000094284	BOK	50.7144							ENSGALT00000057536	SPAG9	1.1257				ENSGALT00000044064	CNP1	5.96596	ENSGALT00000069945	BEND5	9.866	ENSGALT00000086723	RABGGTB	1.02734
			ENSGALT00000094426	CAMK2D	1.71283							ENSGALT00000058103	ZEB1	1.77043				ENSGALT00000044516	NANOG	84.8719	ENSGALT00000070210	ABCA2	3.39623	ENSGALT00000087240	CNTN1	1.25463
			ENSGALT00000094991	KCNMA1	9.95764							ENSGALT00000058158	GPLD1	1.45956				ENSGALT00000044550	GTF2A1L	58.3981	ENSGALT00000070516	PTPRZ1	1.99566	ENSGALT00000088111	ENSGALG00000046567	12.7858
			ENSGALT00000095293	CNTD1	6.41609							ENSGALT00000058384	ADCY8	2.71325				ENSGALT00000044583	ENSGALG00000028666	15.3099	ENSGALT00000070599	NEK10	1.27769	ENSGALT00000088226	ENSGALG00000046135	5.74545
			ENSGALT00000095472	ENSGALG00000033925	3.64618							ENSGALT00000059118	EPHA5	2				ENSGALT00000044821	FAM163B	339.943	ENSGALT00000070667	KIRREL3	2.0059	ENSGALT00000088307	ENSGALG00000046627	1.06105
			ENSGALT00000095627	CCS	2.19031							ENSGALT00000059157	ARHGEF9	1.11929				ENSGALT00000044864	NHLRC4	7.42688	ENSGALT00000071033	ADAMTSL5	3.31943	ENSGALT00000088449	MRPS7	1.52673
			ENSGALT00000096895	DEK	14.0509							ENSGALT00000059307	TPM3	3.81063				ENSGALT00000044892	ENSGALG00000027138	6.40594	ENSGALT00000071049	ENSGALG00000038396	3.85336	ENSGALT00000089329	SUCLG2	2.97051
			ENSGALT00000097457	COMMD4	2.55605							ENSGALT00000059617	TSPAN9	3.16203				ENSGALT00000045212	MC3R	21.5654	ENSGALT00000071210	GFRA4	3.90693	ENSGALT00000089692	ENSGALG00000044218	11.5887
			ENSGALT00000097968	MAPK9	5.88542							ENSGALT00000059647	ENSGALG00000042652	1.14047				ENSGALT00000045464	RNP	40.6179	ENSGALT00000071610	IGFBP7	1.71817	ENSGALT00000089785	DAZAP1	1.09692
			ENSGALT00000098005	SPATA5	1.92227							ENSGALT00000059732	LRMDA	2.2935				ENSGALT00000046841	FRMD5	8.40154	ENSGALT00000071692	SPAG9	2.04698	ENSGALT00000090249	ENSGALG00000048382	22.3103
			ENSGALT00000098258	MBP	2.61356							ENSGALT00000060098	PTCH2	1.47306				ENSGALT00000047080	DLX3	5.36764	ENSGALT00000071770	EMC2	1.45816	ENSGALT00000090527	ENSGALG00000020884	5.147
			ENSGALT00000098470	BCL6	1.87742							ENSGALT00000060256	STK11IP	1.21993				ENSGALT00000048182	CCNB1	41.4615	ENSGALT00000072153	MYL10	2.37736	ENSGALT00000090624	KTN1	1.16512
			ENSGALT00000098783	C5orf51	3.42458							ENSGALT00000060266	SOX14	2.31139				ENSGALT00000049214	VSX2	14.3677	ENSGALT00000072210	ENSGALG00000042500	2.40542	ENSGALT00000090840	MARK3	47.2896
			ENSGALT00000099283	BVES	5.75133							ENSGALT00000060467	AP3B1	1.7623				ENSGALT00000049477	HOXB3	28.2204	ENSGALT00000073257	MYO7A	8.02978	ENSGALT00000091169	NAV3	3.2377
			ENSGALT00000099612	TNKS1BP1	2.27615							ENSGALT00000061021	RPTOR	1.93552				ENSGALT00000049781	HEYL	7.48236	ENSGALT00000073878	ITGB1	2.18399	ENSGALT00000091364	NLRX1	1.61454
			ENSGALT00000099695	BOK	1.79496							ENSGALT00000061711	PTP4A2	1.56048				ENSGALT00000049928	MPPED1	6.05882	ENSGALT00000074239	RRP12	1.29073	ENSGALT00000091402	FUBP3	1.28958
			ENSGALT00000099883	TOP2B	3.2838							ENSGALT00000061762	ENSGALG00000030968	2.63376				ENSGALT00000050158	ENSGALG00000033570	24.8014	ENSGALT00000075899	PLEKHA7	10.3095	ENSGALT00000091525	DGKI	1.36458
			ENSGALT00000099930	EHMT1	11.5274							ENSGALT00000061866	ENSGALG00000036373	1.86133				ENSGALT00000050386	GBX1	11.3206	ENSGALT00000076344	SGSM1	1.92125	ENSGALT00000091673	STRADB	1.08154
			ENSGALT00000100131	STEAP4	2.13304							ENSGALT00000061965	SLIT2	1.21893				ENSGALT00000051631	RNF212	5.14513	ENSGALT00000076960	ENSGALG00000041560	2.13146	ENSGALT00000091945	ENSGALG00000007302	2.37524
			ENSGALT00000100188	GRM3	2.19773							ENSGALT00000062121	ENSGALG00000030636	4.50871				ENSGALT00000051818	IRX1	23.2849	ENSGALT00000077095	CLDN10	2.93738	ENSGALT00000091979	PTPDC1	3.25572
			ENSGALT00000100592	ENSGALG00000013546	2.0634							ENSGALT00000062765	POU3F3	1.73916				ENSGALT00000052574	PHF21B	4.72364	ENSGALT00000077444	HOXB3	2.31285	ENSGALT00000092010	LY75	1.12756
			ENSGALT00000100672	TP63	5.26999							ENSGALT00000063007	DENND1B	1.55541				ENSGALT00000052608	ADAMTS19	24.5671	ENSGALT00000077557	MAP7	1.36712	ENSGALT00000092276	ENSGALG00000050179	14.9272
			ENSGALT00000101494	PLD4	2.14284							ENSGALT00000063066	NHLH2	1.61556				ENSGALT00000052849	ENSGALG00000030888	11.8771	ENSGALT00000077874	ZNF407	1.71255	ENSGALT00000092498	ANAPC10	1.03184
			ENSGALT00000101745	MAP2K5	1.68538							ENSGALT00000063116	MARCH1	1.03954				ENSGALT00000053080	DLX2	5.22781	ENSGALT00000078253	OGN	3.7903	ENSGALT00000092757	NME7	1.27963
			ENSGALT00000101944	TMEM171	5.37555							ENSGALT00000063317	ENSGALG00000045087	1.07462				ENSGALT00000053155	NKX1-1	23.7348	ENSGALT00000078754	GBA2	1.99899	ENSGALT00000092805	ENSGALG00000052246	5.15036
			ENSGALT00000102789	BID	2.19447							ENSGALT00000063439	UBE2T	4.35686				ENSGALT00000055438	NAV1	5.20859	ENSGALT00000079203	UNC80	2.69828	ENSGALT00000093143	GFRA4	1.12455
			ENSGALT00000102956	NSUN6	3.1463							ENSGALT00000063813	AHR	1.76641				ENSGALT00000056158	ENSGALG00000049363	6.57449	ENSGALT00000079741	LMO3	1.77174	ENSGALT00000093300	STK31	1.79785
			ENSGALT00000103033	EML4	3.6583							ENSGALT00000063916	TECTA	1.12849				ENSGALT00000056600	SHOX2	5.68037	ENSGALT00000079809	LRP1B	1.83313	ENSGALT00000093540	PLPPR5	5.59965
			ENSGALT00000103129	ENSGALG00000049046	1.94052							ENSGALT00000064129	GATAD2A	1.32837				ENSGALT00000056793	PDLIM1	31.7974	ENSGALT00000079905	TAPT1	1.45303	ENSGALT00000093645	TAMM41	4.1612
			ENSGALT00000103193	CHIA	1.69431							ENSGALT00000064278	CEP162	8.17175				ENSGALT00000057021	ENSGALG00000032903	19.9551	ENSGALT00000080124	SPAG9	2.95818	ENSGALT00000093736	HPCAL1	1.79253
			ENSGALT00000103221	SPINK5	6.04391							ENSGALT00000064798	HOOK2	1.51187				ENSGALT00000057174	ENSGALG00000038728	30.2707	ENSGALT00000080331	TRPM3	2.92715	ENSGALT00000093780	ENSGALG00000047967	6.85107
			ENSGALT00000103255	RAB17	1.99605							ENSGALT00000064994	DYNC1I1	4.42679				ENSGALT00000057383	PDLIM7	14.2488	ENSGALT00000080533	LRP1B	1.73221	ENSGALT00000093785	PIAS4	3.46243
			ENSGALT00000103635	RNF215	2.91771							ENSGALT00000065660	JAM2	1.02985				ENSGALT00000057823	ARFGAP1	37.1297	ENSGALT00000080683	CNKSR2	1.42384	ENSGALT00000093836	RAB30	1.77829
			ENSGALT00000103875	NMS	3.73684							ENSGALT00000065944	PDZRN3	2.35435				ENSGALT00000057930	ENSGALG00000014955	64.4977	ENSGALT00000080732	ENSGALG00000038454	6.18968	ENSGALT00000093877	NR2C1	3.27957
			ENSGALT00000103971	ME3	1.88172							ENSGALT00000066049	SLC39A11	6.73206				ENSGALT00000058026	IRX3	9.34903	ENSGALT00000082088	SH3GLB1	3.23462	ENSGALT00000094135	ENSGALG00000050720	1.70899
			ENSGALT00000105199	CENPF	2.91773							ENSGALT00000066059	OR52R1	1.31224				ENSGALT00000058548	CILP2	6.6283	ENSGALT00000082689	MRRFP1	2.11757	ENSGALT00000094308	ENSGALG00000049952	1.85093
			ENSGALT00000105399	NLGN4Y	2							ENSGALT00000066461	MAP3K4	1.15526				ENSGALT00000058629	MFAP2	13.2025	ENSGALT00000083503	ARL6	1.49375	ENSGALT00000094316	TOP1MT	1.54925
			ENSGALT00000105769	BCL2L1	1.84137							ENSGALT00000066809	MTMR3	2.32859				ENSGALT00000059569	ENSGALG00000052985	14.5181	ENSGALT00000083565	SYNM	6.70695	ENSGALT00000094323	VAT1	8.9073
			ENSGALT00000106063	CACNA2D1	2.87826							ENSGALT00000066986	SH3YL1	3.43897				ENSGALT00000059581	ENSGALG00000039701	5.12722	ENSGALT00000084003	NOP56	1.9372	ENSGALT00000094416	DDAH1	2.8741
			ENSGALT00000106077	TASOR2	2.23603							ENSGALT00000067348	GHR	2.67703				ENSGALT00000059816	ENSGALG00000002111	74.6616	ENSGALT00000084131	RBL1	3.16216	ENSGALT00000094977	TMLHE	3.34582
			ENSGALT00000106390	HPSE2	6.24203							ENSGALT00000068244	RNF8	2.44389				ENSGALT00000060359	BARHL2	8.4257	ENSGALT00000085165	SCRN1	4.03291	ENSGALT00000095065	SPDYA	1.21371
			ENSGALT00000106498	ENSGALG00000050753	2.64694							ENSGALT00000068318	ENSGALG00000044644	1.29869				ENSGALT00000060582	KIF1B	24.2193	ENSGALT00000085249	ABCC4	2.5231	ENSGALT00000095100	SGMS1	2.86234
			ENSGALT00000107010	CRYBB1	5.50123							ENSGALT00000068374	ARHGAP17	23.915				ENSGALT00000061255	POU4F3	49.724	ENSGALT00000085494	UNC79	1.55011	ENSGALT00000095132	ENSGALG00000052207	1.06369
			ENSGALT00000107375	B3GAT1L	2.28188							ENSGALT00000069400	PRDM13	4.86352				ENSGALT00000061393	ENSGALG00000037599	4.94444	ENSGALT00000085663	NTMT1	1.96506	ENSGALT00000095133	ENSGALG00000051424	1.27316
			ENSGALT00000107823	TBCA	2.20519							ENSGALT00000069557	TPM4	2.82791				ENSGALT00000061428	POU4F2	5.80783	ENSGALT00000085784	MEP1B	8.88014	ENSGALT00000095192	PTGES3	1.41871
			ENSGALT00000107857	ENSGALG00000050151	7.74297							ENSGALT00000069751	PDZD2	1.16067				ENSGALT00000062108	SLC39A11	8.82552	ENSGALT00000085974	OPN4-1	2.64352	ENSGALT00000095215	ISG20	1.17622
			ENSGALT00000108124	ENSGALG00000054803	3.65711							ENSGALT00000069762	RUFY3	2.56368				ENSGALT00000063000	MOS	456.487	ENSGALT00000086326	KY	2.74724	ENSGALT00000095286	TXNIP	86.9837
												ENSGALT00000070011	QKI	5.84927				ENSGALT00000063079	PLEKHH1	4.94134	ENSGALT00000086486	HACD2	2.49818	ENSGALT00000095288	ENSGALG00000053571	4.7915
												ENSGALT00000070043	SPP2	1.87566				ENSGALT00000063490	ENSGALG00000035217	4.99856	ENSGALT00000086763	ZSWIM7	3.7464	ENSGALT00000095733	TSNARE1	17.0382
												ENSGALT00000070094	SOX1	1.43625				ENSGALT00000063798	ASZ1	10.8784	ENSGALT00000087133	ADCYAP1	1.42094	ENSGALT00000095780	EVI5L	1.03679
												ENSGALT00000070223	PPP1R12B	1.57948				ENSGALT00000064874	NKAIN2	14.8524	ENSGALT00000087512	ENSGALG00000046046	6.35	ENSGALT00000095800	P4HA2	1.56673
												ENSGALT00000070498	SRC	3.0873				ENSGALT00000065084	OPRL1	5.03001	ENSGALT00000088154	KCNMA1	5.17045	ENSGALT00000095856	HJV	4.35146
												ENSGALT00000071042	RAB1B	4.27059				ENSGALT00000065678	NUMB	9.47692	ENSGALT00000089758	ENSGALG00000054298	1.78216	ENSGALT00000096013	ENSGALG00000047376	1.36521
												ENSGALT00000071412	NEUROD2	1.15499				ENSGALT00000065840	IL9	29.3291	ENSGALT00000089972	OPCML	4.09549	ENSGALT00000096036	ENSGALG00000012317	2
												ENSGALT00000071439	FAM13B	1.1224				ENSGALT00000066312	LHX4	52.475	ENSGALT00000090384	SPINK4	1.38461	ENSGALT00000096324	ENSGALG00000009468	1.61829
												ENSGALT00000071909	ENSGALG00000041249	1.07791				ENSGALT00000066317	GRID2IP	22.9034	ENSGALT00000090505	ATP8B2	16.903	ENSGALT00000096328	ENSGALG00000050528	5.275
												ENSGALT00000071920	ENSGALG00000038269	3.82927				ENSGALT00000066475	ENSGALG00000040923	9.36426	ENSGALT00000090543	ENSGALG00000052992	1.63125	ENSGALT00000096355	ZNF131	1.40214
												ENSGALT00000072470	ENSGALG00000043575	1.17549				ENSGALT00000066583	ALX4	2.06016	ENSGALT00000090633	PLCH1	2.04437	ENSGALT00000096388	ZNF710	1.2327
												ENSGALT00000072777	STOX2	1.243				ENSGALT00000067150	TBR1	5.91901	ENSGALT00000090643	OTOS	4.84833	ENSGALT00000096728	ENSGALG00000052503	1.71605
												ENSGALT00000073236	FBXL2	2.12765				ENSGALT00000067236	GRM7	9.47402	ENSGALT00000090697	ENSGALG00000038783	2.84953	ENSGALT00000096761	ATP9B	6.71579
												ENSGALT00000073391	PTPRD	1.12779				ENSGALT00000067760	MDFI	16.3663	ENSGALT00000090784	TPM2	22.411	ENSGALT00000096817	PHC3	2.03065
												ENSGALT00000073417	ENSGALG00000041612	1.31687				ENSGALT00000068765	KDM2A	16.1882	ENSGALT00000090803	PIGN	1.75328	ENSGALT00000097098	COP1	4.07218
												ENSGALT00000073558	STK40	1.44352				ENSGALT00000069044	SLC41A3	6.56103	ENSGALT00000090816	PROK1	2.03495	ENSGALT00000097111	HIC2	1.29344
												ENSGALT00000073871	DAB1	4.34515				ENSGALT00000069220	SP9	134.435	ENSGALT00000091403	PHLDB1	3.26523	ENSGALT00000097186	WRB	2.72725
												ENSGALT00000074246	BFSP2	1.60874				ENSGALT00000069354	FBXO43	40.5486	ENSGALT00000091662	ADGRB3	1.29021	ENSGALT00000097188	RAD51B	1.53986
												ENSGALT00000074362	UNC79	1.43236				ENSGALT00000070049	PXYLP1	7.37821	ENSGALT00000091774	ENSGALG00000051661	1.81991	ENSGALT00000097359	P2RX7	8.14334
												ENSGALT00000074473	ENSGALG00000038424	1.07221				ENSGALT00000070338	UMOD	77.3176	ENSGALT00000091986	LRRC23	2.28165	ENSGALT00000097428	ENSGALG00000006565	1.79483
												ENSGALT00000074762	ENSGALG00000039385	2.73897				ENSGALT00000070404	NOTO	5.79241	ENSGALT00000092076	RGS16	2.03362	ENSGALT00000097539	TBK1	6.26492
												ENSGALT00000075673	EYA4	2.12485				ENSGALT00000070987	ENSGALG00000036140	453.272	ENSGALT00000092562	ENSGALG00000051077	2.14521	ENSGALT00000097572	GPR1	8.01275
												ENSGALT00000076174	BUD13	8.83154				ENSGALT00000071212	ENSGALG00000047437	5.03646	ENSGALT00000092831	TNC	3.17428	ENSGALT00000097593	CPQ	2.20142
												ENSGALT00000076302	RPS6KA6	1.63554				ENSGALT00000071551	EDBETA	59.599	ENSGALT00000093005	SALL4	1.72686	ENSGALT00000097891	ENSGALG00000050582	1.41855
												ENSGALT00000076380	SDCBP	1.85136				ENSGALT00000071936	ENSGALG00000053784	18.3829	ENSGALT00000093595	KANSL2	3.93043	ENSGALT00000097928	KLF12	1.28442
												ENSGALT00000076408	RIMBP2	1.45779				ENSGALT00000072069	HOXC13	30.281	ENSGALT00000093926	CACNA1C	3.59208	ENSGALT00000097997	NEO1	3.86255
												ENSGALT00000076911	ENSGALG00000033314	707.957				ENSGALT00000072330	NTRK3	29.9318	ENSGALT00000093943	ENSGALG00000009205	2.59849	ENSGALT00000098041	FOXP4	2.69793
												ENSGALT00000076912	ENSGALG00000013007	4.42788				ENSGALT00000072504	PPP2R2A	22.3431	ENSGALT00000093993	ENSGALG00000048452	1.70397	ENSGALT00000098087	FUBP3	1.16349
												ENSGALT00000077419	DRD2	1.14027				ENSGALT00000072535	OTX2	7.64848	ENSGALT00000094122	ENSGALG00000052881	1.96782	ENSGALT00000098158	ENSGALG00000029056	2.29205
												ENSGALT00000077811	ENSGALG00000002439	2.70069				ENSGALT00000072662	GBX2	27.6133	ENSGALT00000094156	COL13A1	5.48958	ENSGALT00000098361	TMCO4	1.07069
												ENSGALT00000077973	NETO1	3.74373				ENSGALT00000072767	RAX	16.8377	ENSGALT00000094170	ENSGALG00000031313	1.55208	ENSGALT00000098958	ABCB8	1.02156
												ENSGALT00000078251	COBL	1.95028				ENSGALT00000072961	ENSGALG00000033752	22.4236	ENSGALT00000094227	PARD3	1.62008	ENSGALT00000099118	SLC5A10	1.27813
												ENSGALT00000078255	ENSGALG00000035960	1.78587				ENSGALT00000073248	SPO11	64.3249	ENSGALT00000094372	VEZT	2.30215	ENSGALT00000099177	ENSGALG00000047838	7.33784
												ENSGALT00000078278	AKT3	1.91545				ENSGALT00000073590	ZIC3	130.862	ENSGALT00000094540	DNM1L	2.59863	ENSGALT00000099301	KLF8	4.17139
												ENSGALT00000078406	ENSGALG00000028530	1.5504				ENSGALT00000073846	KIRREL3	5.03819	ENSGALT00000094711	NUDT15	1.41886	ENSGALT00000099356	LPP	1.14329
												ENSGALT00000078679	MLXIPL	1.04217				ENSGALT00000074074	NEUROG1	6.06813	ENSGALT00000094968	EPRS	6.21378	ENSGALT00000099422	GRAMD2A	1.02909
												ENSGALT00000079072	HK2	3.19723				ENSGALT00000074189	TMEM104	9.75864	ENSGALT00000095193	ACAP1	5.18788	ENSGALT00000099442	ENSGALG00000048028	1.15909
												ENSGALT00000079098	DVL3	1.48669				ENSGALT00000074502	KIFC3	15.0074	ENSGALT00000095400	EFR3A	1.53937	ENSGALT00000099459	PSMG4	2.1811
												ENSGALT00000079598	TRPC6	2.20861				ENSGALT00000074512	BPIFC	4.33857	ENSGALT00000095543	ENSGALG00000045232	1.86301	ENSGALT00000099646	CABP1	1.23633
												ENSGALT00000080391	NOV	1.35576				ENSGALT00000075143	SH3PXD2B	9.74249	ENSGALT00000096184	ENSGALG00000052814	5.08808	ENSGALT00000099706	PRPF39	1.14055
												ENSGALT00000080515	SLC39A14	1.08429				ENSGALT00000075534	EN2	6.92739	ENSGALT00000096213	EVI5	3.04523	ENSGALT00000099818	ENSGALG00000052737	2.20349
												ENSGALT00000080549	ADGRL3	1.08255				ENSGALT00000075762	SUMF1	11.2181	ENSGALT00000096305	LRRC3B	1.42169	ENSGALT00000099995	TSPAN4	7.70164
												ENSGALT00000080854	CYP7A1	1.36748				ENSGALT00000075849	EMILIN3	145.577	ENSGALT00000096360	SGCE	78.7125	ENSGALT00000100018	TMEM131L	1.05648
												ENSGALT00000081144	FARS2	1.60886				ENSGALT00000076204	ENSGALG00000031444	5.49422	ENSGALT00000096438	ATG13	1.51682	ENSGALT00000100023	OSBPL2	16.2949
												ENSGALT00000081169	ASB5	5.81338				ENSGALT00000076720	EGF	8.8859	ENSGALT00000096447	ANK2	2.47597	ENSGALT00000100065	SYNDIG1	9.76821
												ENSGALT00000081310	IKZF1	1.97353				ENSGALT00000076877	ENSGALG00000037678	75.4573	ENSGALT00000097579	MYOCD	10.0912	ENSGALT00000100113	DGKH	1.2314
												ENSGALT00000081919	ENSGALG00000023506	2.14246				ENSGALT00000077041	HS3ST6	10.8522	ENSGALT00000097670	CDKL5	1.9191	ENSGALT00000100191	GALNT7	1.6862
												ENSGALT00000082143	TSC2	5.44291				ENSGALT00000077339	PAX7	4.17076	ENSGALT00000097708	ENSGALG00000050344	4.62248	ENSGALT00000100195	ARVCF	2.63859
												ENSGALT00000082280	USP6NL	1.05483				ENSGALT00000078083	TAFA4	5.87871	ENSGALT00000097721	ANK2	1.48154	ENSGALT00000100398	ENSGALG00000047995	2.85837
												ENSGALT00000082796	SERPINE2	1.91095				ENSGALT00000078140	FAM222A	6.23932	ENSGALT00000097755	ATG9A	1.56425	ENSGALT00000100521	LZTS2	7.70114
												ENSGALT00000083197	TNFRSF11A	10.1604				ENSGALT00000078410	NEUROD4	11.7923	ENSGALT00000097792	ENSGALG00000053002	2.37335	ENSGALT00000100714	ENSGALG00000053173	1.09272
												ENSGALT00000083203	ENSGALG00000053708	1.35588				ENSGALT00000078413	RAB5C	10.6259	ENSGALT00000097831	ENKD1	5.95795	ENSGALT00000100987	PPP1R12C	77.7054
												ENSGALT00000083357	ENSGALG00000044662	1.48091				ENSGALT00000078500	VRTN	218.053	ENSGALT00000097879	EIF4G1	1.33005	ENSGALT00000101037	ENSGALG00000048236	1.02388
												ENSGALT00000083741	GSDMA	3.01285				ENSGALT00000078705	GSX2	8.00372	ENSGALT00000098042	CADM2	2.36051	ENSGALT00000101449	KTN1	1.98204
												ENSGALT00000083952	CAT	49.6685				ENSGALT00000078946	RACGAP1	6.54749	ENSGALT00000098116	GABRP	2.51087	ENSGALT00000101566	EIF2AK4	2.77701
												ENSGALT00000084007	ENSGALG00000045876	6.73792				ENSGALT00000079267	SCARB1	11.0755	ENSGALT00000098130	ENSGALG00000004394	1.32751	ENSGALT00000101611	ENSGALG00000026070	1.4428
												ENSGALT00000084077	RSRC2	1.21294				ENSGALT00000079503	ENSGALG00000040205	1.9968	ENSGALT00000098171	MAGI1	3.767	ENSGALT00000101844	ENSGALG00000054645	1.60163
												ENSGALT00000084092	SFXN2	1.68974				ENSGALT00000079672	UBAP2L	108.251	ENSGALT00000098175	TAL2	3.32131	ENSGALT00000102072	MVB12B	3.83077
												ENSGALT00000084285	RFX8	1.15013				ENSGALT00000080954	CSPG5	19.2517	ENSGALT00000098517	ILDR2	5.27131	ENSGALT00000102242	ZNF644	1.86935
												ENSGALT00000084374	ELAVL4	1.76303				ENSGALT00000081122	ANK2	8.79167	ENSGALT00000098604	SEMA6D	1.62691	ENSGALT00000102281	ENSGALG00000046864	2.0347
												ENSGALT00000084611	CCDC112	1.56358				ENSGALT00000081568	ENSGALG00000042845	16.5685	ENSGALT00000098687	CCDC103	1.56998	ENSGALT00000102282	ENSGALG00000054501	1.33113
												ENSGALT00000084664	POPDC2	12.7358				ENSGALT00000081572	ENSGALG00000039008	7.63274	ENSGALT00000098696	SLC39A13	2.15068	ENSGALT00000102392	AGAP3	1.38902
												ENSGALT00000085011	ENSGALG00000046785	1.35536				ENSGALT00000081702	MEI4	12.7692	ENSGALT00000098700	NOS3	4.08958	ENSGALT00000102582	ENSGALG00000029653	1.28497
												ENSGALT00000085174	ENSGALG00000044541	7.95894				ENSGALT00000081713	ENSGALG00000031804	139.714	ENSGALT00000098843	SH2D5	1.60274	ENSGALT00000102675	ENSGALG00000045026	2.31731
												ENSGALT00000085411	CREBRF	2.04084				ENSGALT00000082106	SGK2	7.93813	ENSGALT00000098955	KCTD17	3.11473	ENSGALT00000102727	ENSGALG00000052531	1.38542
												ENSGALT00000085449	ENSGALG00000045327	1.99469				ENSGALT00000082459	PTHLH	5.81181	ENSGALT00000099204	EVI5	3.74234	ENSGALT00000102840	FCHSD1	1.44726
												ENSGALT00000085487	XYLB	5.232				ENSGALT00000083410	ENSGALG00000043916	5.41615	ENSGALT00000099539	ENSGALG00000010303	1.68847	ENSGALT00000102980	CEP44	1.10498
												ENSGALT00000085612	WDR26	2.53603				ENSGALT00000083905	ENSGALG00000054241	5.66234	ENSGALT00000099613	MYO1D	1.50886	ENSGALT00000103004	ENSGALG00000053578	3.31553
												ENSGALT00000086194	ENSGALG00000045030	5.02067				ENSGALT00000084312	ENSGALG00000046353	8.1	ENSGALT00000099643	AIMP1	2.60746	ENSGALT00000103086	ZNF618	1.73365
												ENSGALT00000086309	RAD52	1.54263				ENSGALT00000084386	GSC	5.21324	ENSGALT00000099809	KIAA0355	2.20389	ENSGALT00000103339	PTN	1.51003
												ENSGALT00000086320	PDLIM7	2.18154				ENSGALT00000084546	C11orf91	7.73718	ENSGALT00000099833	ENSGALG00000013155	3.19023	ENSGALT00000103554	ENSGALG00000016105	2.3519
												ENSGALT00000086936	DLGAP4	1.07567				ENSGALT00000084734	TMEM104	9.55173	ENSGALT00000100036	DOCK4	1.44936	ENSGALT00000103683	ENSGALG00000021855	11.0545
												ENSGALT00000086998	ENSGALG00000051843	6.05263				ENSGALT00000085210	ANAPC2	8.44599	ENSGALT00000100427	SLC35F4	3.65105	ENSGALT00000103808	ISOC1	1.12409
												ENSGALT00000087346	ENSGALG00000046064	1.13137				ENSGALT00000085410	ENSGALG00000043381	9.68282	ENSGALT00000100433	CSNK1G1	11.6204	ENSGALT00000103847	COLGALT1	2.56805
												ENSGALT00000087382	ENSGALG00000008646	1.70882				ENSGALT00000085549	TRIM35	7.35497	ENSGALT00000100476	ENSGALG00000047063	1.25604	ENSGALT00000103933	GPATCH8	28.2563
												ENSGALT00000087432	ENSGALG00000044425	1.77219				ENSGALT00000085586	SHISA3	12.3631	ENSGALT00000100498	ENSGALG00000051554	1.3339	ENSGALT00000104030	NAV3	2.12926
												ENSGALT00000087454	SPHKAP	2.05623				ENSGALT00000086057	ENSGALG00000044567	4.2684	ENSGALT00000100513	RRBP1	1.81312	ENSGALT00000104031	THAP5	1.42819
												ENSGALT00000087464	ENSGALG00000045377	4.81189				ENSGALT00000086200	C18orf63	7.72462	ENSGALT00000100558	MICU2	1.9453	ENSGALT00000104319	ENSGALG00000016969	2.93084
												ENSGALT00000087622	LAMP5	2.86811				ENSGALT00000086367	VDAC2	19.0801	ENSGALT00000101160	ENSGALG00000016677	1.34639	ENSGALT00000104353	ENSGALG00000047313	2.18548
												ENSGALT00000087641	ENSGALG00000048251	2.13062				ENSGALT00000086419	ENSGALG00000044463	7.75831	ENSGALT00000101345	CACNA1D	3.51091	ENSGALT00000104500	NAV3	2.10273
												ENSGALT00000088033	SLC4A1	5.2053				ENSGALT00000087043	ENSGALG00000046637	8.18222	ENSGALT00000101397	SLC19A2	1.74204	ENSGALT00000104502	TOX	1.95635
												ENSGALT00000088064	FUBP1	5.61541				ENSGALT00000087072	ENSGALG00000022976	5.425	ENSGALT00000101465	EPN2	1.4366	ENSGALT00000104538	ARHGAP24	2.31294
												ENSGALT00000088376	CORO1C	2.21327				ENSGALT00000087127	ENSGALG00000044995	13.9604	ENSGALT00000101891	ENSGALG00000054942	4.60038	ENSGALT00000104823	PCDHAC1	11.083
												ENSGALT00000088517	FOXM1	1.99118				ENSGALT00000087191	ENSGALG00000045947	5.39151	ENSGALT00000102180	NTM	3.38938	ENSGALT00000104905	ARHGAP39	4.78344
												ENSGALT00000088672	ENSGALG00000041483	1.5042				ENSGALT00000087440	ENSGALG00000046455	5.72671	ENSGALT00000102287	TMEM57	3.24022	ENSGALT00000105031	LPP	1.35494
												ENSGALT00000088858	BG8	55.3926				ENSGALT00000087753	ENSGALG00000044146	5.3	ENSGALT00000102491	ENSGALG00000052330	2	ENSGALT00000105043	NRXN1	1.30712
												ENSGALT00000089081	ENSGALG00000007193	1.63731				ENSGALT00000088078	ISOC2	5.7505	ENSGALT00000102529	FAT1	1.48367	ENSGALT00000105128	ETV6	1.81455
												ENSGALT00000089217	NEGR1	1.28161				ENSGALT00000088117	ENSGALG00000049970	6.21489	ENSGALT00000102576	ENSGALG00000046455	5.4717	ENSGALT00000105405	ENSGALG00000051796	1.09278
												ENSGALT00000089229	ENSGALG00000046336	1.61155				ENSGALT00000088479	ENSGALG00000044506	7.41818	ENSGALT00000102748	ENSGALG00000015219	1.73445	ENSGALT00000105423	ENSGALG00000050634	2.24566
												ENSGALT00000089276	NFIA	1.29216				ENSGALT00000088577	ENSGALG00000047588	15.2112	ENSGALT00000102750	SLC16A14	8.59	ENSGALT00000105605	ENSGALG00000035825	3.93289
												ENSGALT00000089467	BF1	112.427				ENSGALT00000088633	ENSGALG00000044261	10.4747	ENSGALT00000102764	TMEM184A	12.1075	ENSGALT00000105703	ACAP1	1.99735
												ENSGALT00000089852	ENSGALG00000040182	1.77236				ENSGALT00000089538	ENSGALG00000045026	14.5767	ENSGALT00000102886	BICD1	2.08182	ENSGALT00000105783	PHLDB1	1.13036
												ENSGALT00000089934	ENSGALG00000045907	1.56973				ENSGALT00000089648	ENSGALG00000045544	8.40212	ENSGALT00000103121	ENSGALG00000006724	1.36556	ENSGALT00000105824	TXLNG	2.00771
												ENSGALT00000089963	ENSGALG00000054149	1.93047				ENSGALT00000089916	CCNB1	16.5801	ENSGALT00000103148	CEP120	3.92374	ENSGALT00000106004	ENSGALG00000047207	1.15114
												ENSGALT00000090002	ENSGALG00000048247	5.45103				ENSGALT00000090341	ENSGALG00000006072	3.73636	ENSGALT00000103280	CABP4	1.36762	ENSGALT00000106227	TXNRD2	1.08609
												ENSGALT00000090126	ENSGALG00000053623	1.11814				ENSGALT00000090475	ENSGALG00000049114	5.32961	ENSGALT00000103463	PHLDB2	2.68817	ENSGALT00000106270	ENSGALG00000054942	1.57704
												ENSGALT00000090161	ENSGALG00000046409	2.34931				ENSGALT00000090522	NIN	9.34971	ENSGALT00000103524	ENSGALG00000052198	1.48244	ENSGALT00000106387	SULT4A1	7.61019
												ENSGALT00000090217	ENSGALG00000054384	4.94445				ENSGALT00000090722	TAFA3	8.85091	ENSGALT00000103939	VPS16	2.24942	ENSGALT00000106568	VPS13C	2.18425
												ENSGALT00000090349	SLC24A2	3.21557				ENSGALT00000090861	PRMT9	7.00523	ENSGALT00000104127	PCSK7	1.89646	ENSGALT00000106580	ENSGALG00000010554	3.12618
												ENSGALT00000090453	ENSGALG00000054003	3.34044				ENSGALT00000090927	GUCA1B	16.3098	ENSGALT00000104313	FSTL4	15.8079	ENSGALT00000106748	PNPLA6	2.38663
												ENSGALT00000090487	ENSGALG00000051781	1.52				ENSGALT00000091174	DYM	14.8395	ENSGALT00000104664	ENSGALG00000030908	4.63698	ENSGALT00000106838	TAOK3	12.4129
												ENSGALT00000090502	ZNF516	1.46111				ENSGALT00000091180	ENSGALG00000047981	80.3942	ENSGALT00000104844	ADGRB1	2.13495	ENSGALT00000107013	CST7	11.7369
												ENSGALT00000090508	AP2A2	1.45562				ENSGALT00000091302	COL13A1	7.60237	ENSGALT00000104967	ENSGALG00000047567	1.27525	ENSGALT00000107444	HK2	2.48143
												ENSGALT00000090526	PTPRS	5.41015				ENSGALT00000091322	VSNL1	7.02234	ENSGALT00000105021	CDC42BPA	5.70639	ENSGALT00000107773	AKTIP	21.9339
												ENSGALT00000090530	ENSGALG00000054596	1.8278				ENSGALT00000091385	ENSGALG00000051812	7.86175	ENSGALT00000105211	ENSGALG00000048789	1.49627	ENSGALT00000107881	CCDC103	1.307
												ENSGALT00000090536	ENSGALG00000050834	1.09701				ENSGALT00000091484	POMGNT2	5.61727	ENSGALT00000105437	RFESD	2.15538	ENSGALT00000108025	MPP4	4.78645
												ENSGALT00000090606	ENSGALG00000051997	2.51882				ENSGALT00000091637	GJB5	9.23569	ENSGALT00000105460	PDK4	2.81293	ENSGALT00000108056	GRK3	1.47959
												ENSGALT00000090667	ENSGALG00000052979	6.08753				ENSGALT00000091856	KCNV1	10.1994	ENSGALT00000105585	BTD	1.35729	ENSGALT00000108256	SIL1	1.21405
												ENSGALT00000090687	ENSGALG00000053516	1.87336				ENSGALT00000092038	ENSGALG00000054682	5.61636	ENSGALT00000105597	ATG13	4.77836	ENSGALT00000108365	ANKRD11	1.10081
												ENSGALT00000090696	ENSGALG00000048185	2.21277				ENSGALT00000092154	BICC1	5.0795	ENSGALT00000105660	ELP4	1.30314
												ENSGALT00000090753	ENSGALG00000050179	1.54092				ENSGALT00000092385	NEIL2	124.364	ENSGALT00000105912	KALRN	1.31055
												ENSGALT00000090766	NIN	3.33584				ENSGALT00000092647	ENSGALG00000047911	32.1675	ENSGALT00000105988	LRTM2	5.01488
												ENSGALT00000090774	ENSGALG00000053908	3.722				ENSGALT00000092750	ENSGALG00000048396	10.5883	ENSGALT00000106160	JAKMIP3	2.36999
												ENSGALT00000090827	UBR2	2.78021				ENSGALT00000092824	ARRDC3	23.2172	ENSGALT00000106241	MPDZ	1.99813
												ENSGALT00000091046	JAK2	2.61303				ENSGALT00000093248	ENSGALG00000052295	11.6958	ENSGALT00000106693	LIMS2	2.68409
												ENSGALT00000091156	ENSGALG00000046707	1.35509				ENSGALT00000093488	ENSGALG00000050277	5.80813	ENSGALT00000106706	GIT1	2.23869
												ENSGALT00000091263	ENSGALG00000049840	1.32663				ENSGALT00000093513	JAKMIP3	5.51541	ENSGALT00000106810	ENSGALG00000036680	1.71463
												ENSGALT00000091300	NFE2L2	3.46396				ENSGALT00000093680	PCGF6	5.7865	ENSGALT00000106998	PIRT	1.49843
												ENSGALT00000091431	ENSGALG00000050031	1.99356				ENSGALT00000093793	ENSGALG00000053275	12.0432	ENSGALT00000107140	C16orf89	1.26355
												ENSGALT00000091453	OTUD7A	2.2233				ENSGALT00000093795	NRTN	82.7242	ENSGALT00000107237	SLC26A7	1.36989
												ENSGALT00000091459	ENSGALG00000053665	2.45381				ENSGALT00000093950	RGS16	16.5634	ENSGALT00000107322	KIF12	1.8537
												ENSGALT00000091467	ADGRB2	1.34876				ENSGALT00000093955	AGPAT4	8.21109	ENSGALT00000107363	SEMA6D	3.26616
												ENSGALT00000091514	ENSGALG00000051453	3.07421				ENSGALT00000093972	SLAIN1	15.0178	ENSGALT00000107443	CACNA1C	2.93164
												ENSGALT00000091518	ENSGALG00000050452	5.09506				ENSGALT00000094114	CDC20B	14.3496	ENSGALT00000107511	PPP1R9A	1.2481
												ENSGALT00000091582	ENSGALG00000046256	3.55232				ENSGALT00000094155	DOCK10	9.72936	ENSGALT00000107515	RAP1GAP	4.14745
												ENSGALT00000091633	ENSGALG00000048685	4.39606				ENSGALT00000094157	ENSGALG00000002083	112.97	ENSGALT00000107916	ATP1B3	6.29549
												ENSGALT00000091770	NFE2L2	6.02352				ENSGALT00000094283	HTR2C	21.1326	ENSGALT00000107965	HEPACAM	1.55556
												ENSGALT00000091815	ENSGALG00000053522	2.27719				ENSGALT00000094530	ENSGALG00000054787	3.53024	ENSGALT00000108276	ENSGALG00000006724	4.35649
												ENSGALT00000091834	ODF2L	1.22218				ENSGALT00000094599	AKT2	7.14438
												ENSGALT00000091877	ASAP3	5.35534				ENSGALT00000094650	ENSGALG00000044225	5.81783
												ENSGALT00000091956	ENSGALG00000052575	2.14927				ENSGALT00000094986	OSTN	17.083
												ENSGALT00000091971	ENSGALG00000044260	1.46802				ENSGALT00000095265	ENSGALG00000052798	107.698
												ENSGALT00000091997	ENSGALG00000051980	2.41844				ENSGALT00000095296	IQSEC3	6.55828
												ENSGALT00000092025	ENSGALG00000048014	2.58013				ENSGALT00000095388	EPB41	7.11
												ENSGALT00000092030	ROPN1L	4.44477				ENSGALT00000095405	ENSGALG00000055026	20.4839
												ENSGALT00000092064	PIBF1	1.50399				ENSGALT00000095414	FMNL1	11.9458
												ENSGALT00000092067	ENSGALG00000053626	6.00394				ENSGALT00000095567	ENSGALG00000048301	6.75277
												ENSGALT00000092089	ENSGALG00000048743	1.44398				ENSGALT00000095722	ENSGALG00000048373	5.77391
												ENSGALT00000092191	AKAP9	1.04814				ENSGALT00000095785	ENSGALG00000050919	7.71189
												ENSGALT00000092221	ENSGALG00000050274	1.03022				ENSGALT00000095930	ENSGALG00000047129	6.5
												ENSGALT00000092230	TNFRSF1A	1.2489				ENSGALT00000096000	ENSGALG00000045668	7.49362
												ENSGALT00000092286	ENSGALG00000021395	10.2093				ENSGALT00000096062	EBF2	10.428
												ENSGALT00000092372	PRKAR1A	1.11862				ENSGALT00000096140	FLNA	5.32877
												ENSGALT00000092490	ENSGALG00000047064	1.4847				ENSGALT00000096151	CCDC25	5.83586
												ENSGALT00000092542	ENSGALG00000054754	2.29745				ENSGALT00000096245	FNBP1	5.72916
												ENSGALT00000092573	ENSGALG00000054158	2.23732				ENSGALT00000096349	ENSGALG00000052052	14.5332
												ENSGALT00000092628	BRD8	7.49115				ENSGALT00000096579	ENSGALG00000012005	2.54739
												ENSGALT00000092637	ENSGALG00000052402	1.08905				ENSGALT00000096624	TRIM9	5.79798
												ENSGALT00000092735	ENSGALG00000054739	3.07396				ENSGALT00000096672	ATAD2	34.4951
												ENSGALT00000092742	ENSGALG00000053183	2.07709				ENSGALT00000096679	ENSGALG00000042845	6.64109
												ENSGALT00000092759	ENSGALG00000048416	2.1764				ENSGALT00000096692	ENSGALG00000050281	6.28842
												ENSGALT00000092766	ENSGALG00000020775	2.63112				ENSGALT00000096892	NRF1	6.69226
												ENSGALT00000092828	APOBEC4	2.56074				ENSGALT00000097256	ENSGALG00000049000	26.4334
												ENSGALT00000092848	ENSGALG00000053213	1.94717				ENSGALT00000097259	WASH1	6.59602
												ENSGALT00000092881	ENSGALG00000052363	1.96899				ENSGALT00000097291	ENSGALG00000054904	16.9461
												ENSGALT00000092901	TFEC	1.75479				ENSGALT00000097379	ENSGALG00000055082	12.0971
												ENSGALT00000092951	NBN	2.69154				ENSGALT00000097382	C8orf88	5.53515
												ENSGALT00000092954	ENSGALG00000050209	2.09778				ENSGALT00000097454	ENSGALG00000034376	6.29648
												ENSGALT00000092965	IQGAP2	1.73357				ENSGALT00000097636	ENSGALG00000054898	19.9901
												ENSGALT00000093032	ENSGALG00000054413	2.06877				ENSGALT00000097654	ENSGALG00000050069	6.95956
												ENSGALT00000093112	ENSGALG00000052928	1.94717				ENSGALT00000097693	CDH2	6.83796
												ENSGALT00000093236	ATP6V1A	1.2093				ENSGALT00000097707	ENSGALG00000039708	6.083
												ENSGALT00000093254	ENSGALG00000039727	1.06085				ENSGALT00000097866	ENSGALG00000053966	47.5698
												ENSGALT00000093304	CTHRC1	1.55656				ENSGALT00000098126	TP63	35.733
												ENSGALT00000093570	ENSGALG00000052695	1.52207				ENSGALT00000098296	ENSGALG00000047550	41.1449
												ENSGALT00000093640	TNFRSF1A	1.27687				ENSGALT00000098609	NKX1-2	9.03399
												ENSGALT00000093786	ENSGALG00000050991	1.94157				ENSGALT00000098749	ENSGALG00000054913	14.2775
												ENSGALT00000093815	ENSGALG00000049628	1.75187				ENSGALT00000098805	ENSGALG00000051290	33.6575
												ENSGALT00000093869	ENSGALG00000049713	1.21986				ENSGALT00000098959	ELAVL2	3.89637
												ENSGALT00000094031	ENSGALG00000052882	1.38886				ENSGALT00000099247	ENSGALG00000051473	5.59414
												ENSGALT00000094071	ENSGALG00000054416	6.23488				ENSGALT00000099269	GPD2	7.15128
												ENSGALT00000094072	ZNF292	1.42104				ENSGALT00000099332	ENSGALG00000051746	8.00477
												ENSGALT00000094090	ENSGALG00000050583	2.45381				ENSGALT00000099572	ENSGALG00000052593	5.83099
												ENSGALT00000094216	ENSGALG00000047857	1.12487				ENSGALT00000099921	C7orf25	5.14072
												ENSGALT00000094240	ENSGALG00000054098	10.5292				ENSGALT00000099985	BDNF	22.9206
												ENSGALT00000094634	SIPA1	7.66605				ENSGALT00000100044	SNX5	10.8255
												ENSGALT00000094665	ENSGALG00000050043	1.97168				ENSGALT00000100144	ENSGALG00000049870	6.21157
												ENSGALT00000094743	ENSGALG00000049449	3.30519				ENSGALT00000100318	ENSGALG00000051930	13.6176
												ENSGALT00000094820	ENSGALG00000013101	1.36951				ENSGALT00000100350	ENSGALG00000008141	39.4594
												ENSGALT00000094839	ENSGALG00000052861	1.45669				ENSGALT00000100510	IP6K1	13.171
												ENSGALT00000094897	ENSGALG00000054408	1.51955				ENSGALT00000100617	ALKBH8	6.43861
												ENSGALT00000094898	NDUFAF6	1.43378				ENSGALT00000100801	RASIP1	6.14178
												ENSGALT00000094901	ENSGALG00000027716	2.28863				ENSGALT00000100835	C14orf39	14.955
												ENSGALT00000094924	ENSGALG00000046824	1.30774				ENSGALT00000101149	LRRC74B	10.6029
												ENSGALT00000095029	ENSGALG00000049044	1.55407				ENSGALT00000101161	ENSGALG00000023506	6.86371
												ENSGALT00000095081	SORBS2	1.72978				ENSGALT00000101169	ENSGALG00000053778	6.71559
												ENSGALT00000095082	ZFPM2	2.62292				ENSGALT00000101172	TSSC1	7.66231
												ENSGALT00000095169	ENSGALG00000054175	3.12188				ENSGALT00000101197	ENSGALG00000052053	7.79719
												ENSGALT00000095200	ENSGALG00000054852	1.19551				ENSGALT00000101207	ENSGALG00000053749	7.45703
												ENSGALT00000095240	ENSGALG00000048890	2.89724				ENSGALT00000101281	SYCP2L	86.4095
												ENSGALT00000095324	TRAPPC13	1.79243				ENSGALT00000101405	HGF	7.6196
												ENSGALT00000095410	ENSGALG00000054082	1.44054				ENSGALT00000101481	ENSGALG00000052026	4.49048
												ENSGALT00000095495	ENSGALG00000050695	7.82051				ENSGALT00000101483	ENSGALG00000028222	29.8523
												ENSGALT00000095538	HDAC7	1.27626				ENSGALT00000101514	ENSGALG00000054187	5.64624
												ENSGALT00000095560	ENSGALG00000048604	1.64527				ENSGALT00000101564	SLCO5A1	20.7517
												ENSGALT00000095587	TLR21	2.11881				ENSGALT00000101704	PAPD7	7.33486
												ENSGALT00000095703	IL31RA	4.01606				ENSGALT00000101720	RFX2	0.41181
												ENSGALT00000095788	ENSGALG00000049009	1.07576				ENSGALT00000101850	SPATA22	7.68787
												ENSGALT00000095809	ENSGALG00000049685	1.18954				ENSGALT00000101923	TBR1	19.6204
												ENSGALT00000095842	ENSGALG00000051576	1.60841				ENSGALT00000101953	TMTC1	6.13154
												ENSGALT00000095885	ASNSD1	3.1472				ENSGALT00000102299	KCNC4	10.8342
												ENSGALT00000095919	ENSGALG00000051731	1.4334				ENSGALT00000102439	ENSGALG00000035362	5.32574
												ENSGALT00000095925	ENSGALG00000054945	1.68241				ENSGALT00000102447	SLC39A12	1.98545
												ENSGALT00000095934	STARD8	1.08796				ENSGALT00000102660	CYP19A1	2.12767
												ENSGALT00000095949	LARP7	1.47046				ENSGALT00000102753	BRCA1	8.63703
												ENSGALT00000095955	LINS1	2.03137				ENSGALT00000102791	FAM184A	9.91397
												ENSGALT00000095968	CEP112	2.64994				ENSGALT00000102834	NKAIN2	27.4406
												ENSGALT00000096024	SPPL3	1.06905				ENSGALT00000102858	DLX6	5.95299
												ENSGALT00000096225	ENSGALG00000052304	1.67071				ENSGALT00000103021	SLC25A42	0.061653
												ENSGALT00000096392	ENSGALG00000055068	2.45381				ENSGALT00000103060	ENSGALG00000050931	169.261
												ENSGALT00000096455	ENSGALG00000052317	2.42359				ENSGALT00000103085	ENSGALG00000053318	5.55798
												ENSGALT00000096493	ENSGALG00000052666	1.84695				ENSGALT00000103206	ENSGALG00000050069	12.6738
												ENSGALT00000096495	ABLIM2	5.83478				ENSGALT00000103218	SLC22A23	10.517
												ENSGALT00000096496	TSC22D4	2.60183				ENSGALT00000103322	ENSGALG00000051235	5.5106
												ENSGALT00000096569	ADGRF2	1.03598				ENSGALT00000103684	GRP	6.18914
												ENSGALT00000096586	ENSGALG00000047526	1.69783				ENSGALT00000103720	TRPC7	6.12674
												ENSGALT00000096591	ENSGALG00000052313	1.22222				ENSGALT00000103726	BBS5	14.2283
												ENSGALT00000096601	ENSGALG00000053264	3.07396				ENSGALT00000103783	ILF3	5.38847
												ENSGALT00000096603	ENSGALG00000051173	1.6593				ENSGALT00000104052	ENSGALG00000054136	2.17453
												ENSGALT00000096627	ENSGALG00000055105	1.25558				ENSGALT00000104318	HABP2	11.576
												ENSGALT00000096639	ENSGALG00000051894	1.03326				ENSGALT00000104457	ENSGALG00000047338	23.8226
												ENSGALT00000096651	PTBP3	2.62939				ENSGALT00000104473	ENSGALG00000053792	9.80671
												ENSGALT00000096675	STON1	2.66425				ENSGALT00000104486	ENSGALG00000048599	5.25987
												ENSGALT00000096677	ITGB1BP2	1.90996				ENSGALT00000104505	CXXC4	6.23717
												ENSGALT00000096690	ENSGALG00000053589	5.54802				ENSGALT00000104695	ENSGALG00000047393	9.88143
												ENSGALT00000096702	DDX3X	5.35104				ENSGALT00000104772	KCNC2	5.28007
												ENSGALT00000096736	DGKH	1.32542				ENSGALT00000104838	ENSGALG00000048882	7.09211
												ENSGALT00000096751	ENSGALG00000054597	2.9187				ENSGALT00000104948	WDR25	36.3858
												ENSGALT00000096829	OSBPL8	1.05823				ENSGALT00000105064	THRA	10.5225
												ENSGALT00000096831	ZFAND5	4.4883				ENSGALT00000105067	TMOD4	8.45965
												ENSGALT00000096853	ENSGALG00000052474	5.45397				ENSGALT00000105074	GPR135	6.95164
												ENSGALT00000096905	ENSGALG00000054474	1				ENSGALT00000105341	RSPO4	35.5833
												ENSGALT00000096958	MYO18A	2.81566				ENSGALT00000105864	SNAP47	9.41629
												ENSGALT00000096977	ADD3	1.06084				ENSGALT00000105922	KIAA1549L	5.88575
												ENSGALT00000096996	ENSGALG00000052395	1.1381				ENSGALT00000106250	ENSGALG00000017031	17.6442
												ENSGALT00000097016	ENSGALG00000047783	1.62008				ENSGALT00000106255	ENSGALG00000047118	5.24233
												ENSGALT00000097087	HERPUD2	1.55009				ENSGALT00000106421	ENSGALG00000048337	43.4412
												ENSGALT00000097147	ENSGALG00000053248	5.00263				ENSGALT00000106630	ENSGALG00000053716	229.771
												ENSGALT00000097178	AAMDC	8.53608				ENSGALT00000106688	LPCAT1	7.80957
												ENSGALT00000097208	CHRNB2	1.462				ENSGALT00000106712	ENSGALG00000050260	7.18196
												ENSGALT00000097232	ENSGALG00000052157	1.365				ENSGALT00000106767	ENSGALG00000052453	7.37395
												ENSGALT00000097261	ENSGALG00000054278	1.17505				ENSGALT00000106790	KIAA1522	6.25216
												ENSGALT00000097417	ENSGALG00000048329	1.0712				ENSGALT00000106935	ENSGALG00000015324	77.3064
												ENSGALT00000097543	MARCH8	1.31123				ENSGALT00000107023	ENSGALG00000048862	9.08334
												ENSGALT00000097596	ENSGALG00000050855	1.67931				ENSGALT00000107067	FHL1	9.58991
												ENSGALT00000097602	ENSGALG00000050555	1.09937				ENSGALT00000107153	BRPF3	0.062027
												ENSGALT00000097698	CEP162	4.6001				ENSGALT00000107296	ENSGALG00000053318	1.18018
												ENSGALT00000097723	ENSGALG00000049173	3.72864				ENSGALT00000107368	NIN	10.1934
												ENSGALT00000097759	SLK	3.98254				ENSGALT00000107453	GTSE1	9.08089
												ENSGALT00000097854	ENSGALG00000054968	1.67783				ENSGALT00000107701	ENSGALG00000050156	11.5357
												ENSGALT00000097962	ADAM22	2.21923				ENSGALT00000107826	ENSGALG00000039554	11.7327
												ENSGALT00000097967	STK38L	1.18728				ENSGALT00000107855	MEIOC	9.63488
												ENSGALT00000098053	ENSGALG00000053810	1.47477				ENSGALT00000107903	SLC13A5	56.6745
												ENSGALT00000098094	ENSGALG00000053052	2.2423				ENSGALT00000108267	ENSGALG00000046931	12.5976
												ENSGALT00000098276	ENSGALG00000051877	1.68951
												ENSGALT00000098285	CRLF2	3.34324
												ENSGALT00000098294	PI4KA	1.73765
												ENSGALT00000098318	YPEL5	2.27263
												ENSGALT00000098364	ENSGALG00000047805	1.11374
												ENSGALT00000098374	ENSGALG00000047964	1.4594
												ENSGALT00000098484	USP35	1.74447
												ENSGALT00000098533	ENSGALG00000049563	1.85723
												ENSGALT00000098539	ENSGALG00000052240	15.0336
												ENSGALT00000098645	ENSGALG00000050527	3.00355
												ENSGALT00000098681	ENSGALG00000053794	2.45077
												ENSGALT00000098683	ENSGALG00000048974	2.67518
												ENSGALT00000098765	ENSGALG00000047982	1.93947
												ENSGALT00000098870	CAPSL	2.37095
												ENSGALT00000098872	UPK1B	1.313
												ENSGALT00000098905	ENSGALG00000051882	1.70281
												ENSGALT00000099129	NDST3	1.38592
												ENSGALT00000099210	SEMA4C	1.50596
												ENSGALT00000099228	ENSGALG00000047315	4.78125
												ENSGALT00000099323	ENSGALG00000055122	1.25213
												ENSGALT00000099353	ENSGALG00000054858	1.14103
												ENSGALT00000099364	ENSGALG00000054620	1.31619
												ENSGALT00000099401	HPS3	5.77387
												ENSGALT00000099466	SGK3	1.06549
												ENSGALT00000099468	LRRC4C	1.78345
												ENSGALT00000099663	SLC8A3	4.64705
												ENSGALT00000099761	ENSGALG00000053374	1.52267
												ENSGALT00000099786	ENSGALG00000047511	2.01429
												ENSGALT00000099890	ENSGALG00000052919	1.82428
												ENSGALT00000099901	DNAI1	1.34663
												ENSGALT00000099905	ENSGALG00000054666	2.02206
												ENSGALT00000099961	ENSGALG00000054673	6.05306
												ENSGALT00000100012	ENSGALG00000050265	1.51594
												ENSGALT00000100069	REXO1	1.24371
												ENSGALT00000100104	ENSGALG00000051324	1.47055
												ENSGALT00000100125	ADAMTS7	1.0475
												ENSGALT00000100130	ENSGALG00000047234	3.23333
												ENSGALT00000100172	ENSGALG00000048569	3.04878
												ENSGALT00000100198	ADAMTSL1	2.29238
												ENSGALT00000100236	ENSGALG00000047669	1.32611
												ENSGALT00000100263	ENSGALG00000047802	6.3175
												ENSGALT00000100290	ENSGALG00000038975	2.32712
												ENSGALT00000100336	ENSGALG00000052635	1.23485
												ENSGALT00000100349	DMD	5.9623
												ENSGALT00000100454	KLHL12	2.62883
												ENSGALT00000100460	ENSGALG00000051313	1.28508
												ENSGALT00000100461	MYO18A	2.86929
												ENSGALT00000100556	ENSGALG00000047371	1.80793
												ENSGALT00000100689	CEP170	1.48111
												ENSGALT00000100709	ENSGALG00000054192	2.02206
												ENSGALT00000100741	ENSGALG00000053912	2.73913
												ENSGALT00000100783	ENSGALG00000049368	7.82468
												ENSGALT00000100799	EYA3	2.76508
												ENSGALT00000100830	RPP25	1.05928
												ENSGALT00000100840	ENSGALG00000048139	6.25418
												ENSGALT00000100919	ENSGALG00000052974	1.89984
												ENSGALT00000100924	BUD13	1.03571
												ENSGALT00000100942	RP1-27O5.3	1.08286
												ENSGALT00000100952	ENSGALG00000048525	3.27812
												ENSGALT00000101069	SZT2	5.3906
												ENSGALT00000101072	ENSGALG00000050132	2.99082
												ENSGALT00000101118	MSANTD4	4.46098
												ENSGALT00000101338	JAK2	2.01132
												ENSGALT00000101339	ENSGALG00000047355	2.34302
												ENSGALT00000101341	ENSGALG00000047180	2.06832
												ENSGALT00000101350	NAV1	2.14919
												ENSGALT00000101374	IGFBP4	2.07474
												ENSGALT00000101412	ENSGALG00000051009	1.65036
												ENSGALT00000101414	ENSGALG00000047706	1.83775
												ENSGALT00000101439	ENSGALG00000032501	4.58047
												ENSGALT00000101459	ENSGALG00000051399	2.21319
												ENSGALT00000101612	CLN8	3.61182
												ENSGALT00000101621	ENSGALG00000035762	4.17248
												ENSGALT00000101695	DENND5B	1.87283
												ENSGALT00000101716	MCUB	1.27784
												ENSGALT00000101773	ENSGALG00000027147	1.23526
												ENSGALT00000101819	CHST9	5.31687
												ENSGALT00000101919	ENSGALG00000013409	3.08414
												ENSGALT00000101977	ENSGALG00000049124	1.13015
												ENSGALT00000101993	SOBP	2.89782
												ENSGALT00000102082	ENSGALG00000051533	1.83227
												ENSGALT00000102265	ENSGALG00000048673	4.07479
												ENSGALT00000102279	ENSGALG00000055028	1.64078
												ENSGALT00000102289	TNS4	1.13848
												ENSGALT00000102432	ENSGALG00000054029	1.61084
												ENSGALT00000102477	SPRED1	6.73638
												ENSGALT00000102511	GALNT2	2.27368
												ENSGALT00000102550	ME1	12.7663
												ENSGALT00000102573	SESTD1	3.01165
												ENSGALT00000102747	ENSGALG00000052411	1.66504
												ENSGALT00000102902	ENSGALG00000051713	2.03466
												ENSGALT00000102910	ARHGAP6	43.578
												ENSGALT00000102988	ENSGALG00000053127	2.46504
												ENSGALT00000103061	SMOC2	5.9134
												ENSGALT00000103084	CACNA2D1	1.0941
												ENSGALT00000103102	ENSGALG00000052028	4.14242
												ENSGALT00000103136	YEATS2	2.08527
												ENSGALT00000103170	ENSGALG00000046763	1.36874
												ENSGALT00000103260	ENSGALG00000051759	2.45854
												ENSGALT00000103265	ENSGALG00000053841	2.05351
												ENSGALT00000103281	ENSGALG00000048143	2.23301
												ENSGALT00000103405	ENSGALG00000052984	1.56638
												ENSGALT00000103498	FBXW5	1.46539
												ENSGALT00000103544	DENND1B	1.38277
												ENSGALT00000103624	ENSGALG00000051879	1.12008
												ENSGALT00000103640	CACNB1	3.68014
												ENSGALT00000103653	HIPK3	3.87414
												ENSGALT00000103679	TMBIM6	1.61483
												ENSGALT00000103691	ENSGALG00000052434	1.30132
												ENSGALT00000103738	ASPM	6.09449
												ENSGALT00000103894	ENSGALG00000052449	2.43406
												ENSGALT00000103948	ENSGALG00000052552	1.11978
												ENSGALT00000103992	ENSGALG00000051525	1.799
												ENSGALT00000104101	IL1RAP	2.56679
												ENSGALT00000104173	NFE2L2	1.93101
												ENSGALT00000104221	RNF2	3.02134
												ENSGALT00000104232	TTC3	2.85014
												ENSGALT00000104234	ENSGALG00000053520	1.73546
												ENSGALT00000104246	ENSGALG00000047752	20.2565
												ENSGALT00000104257	ENSGALG00000050649	3.86004
												ENSGALT00000104328	ENSGALG00000020488	1.0422
												ENSGALT00000104347	ENSGALG00000054642	2.92895
												ENSGALT00000104409	FAM91A1	1.4929
												ENSGALT00000104531	MGRN1	2.09727
												ENSGALT00000104570	ENSGALG00000052233	1.6068
												ENSGALT00000104619	NEURL1B	1.61855
												ENSGALT00000104624	ENSGALG00000049520	1.29825
												ENSGALT00000104675	ENSGALG00000052244	1.23111
												ENSGALT00000104793	ENSGALG00000049642	2.92969
												ENSGALT00000104851	ENSGALG00000052752	1.10503
												ENSGALT00000104945	ENSGALG00000046911	1.52712
												ENSGALT00000104954	RIN2	1.05546
												ENSGALT00000104970	ENSGALG00000050052	1.15526
												ENSGALT00000104978	ENSGALG00000054096	4.92625
												ENSGALT00000104996	ENSGALG00000053981	2.02206
												ENSGALT00000105052	ENSGALG00000050351	2.83481
												ENSGALT00000105083	ENSGALG00000047088	6.06466
												ENSGALT00000105298	ENSGALG00000052938	3.9837
												ENSGALT00000105342	ENSGALG00000049837	1.50109
												ENSGALT00000105355	ENSGALG00000052158	1.06444
												ENSGALT00000105356	RASGEF1B	1.24395
												ENSGALT00000105359	ENSGALG00000051714	1.65163
												ENSGALT00000105361	OSBPL6	2.2968
												ENSGALT00000105387	PHTF2	1.60968
												ENSGALT00000105417	SCNN1D	1.50497
												ENSGALT00000105456	ENSGALG00000052397	2.82756
												ENSGALT00000105484	ENSGALG00000049830	2.41755
												ENSGALT00000105528	ENSGALG00000048135	3.78116
												ENSGALT00000105652	ENSGALG00000053555	5.68401
												ENSGALT00000105674	ENSGALG00000051305	1.21802
												ENSGALT00000105725	RACGAP1	3.61267
												ENSGALT00000105740	ENSGALG00000055113	2.93366
												ENSGALT00000105815	ENSGALG00000053001	2.02206
												ENSGALT00000105839	ENSGALG00000055132	1.99793
												ENSGALT00000105842	TRIM3	1.24334
												ENSGALT00000105965	RAD9B	4.31765
												ENSGALT00000105992	ENSGALG00000050653	2.46472
												ENSGALT00000106045	RHOF	9.30026
												ENSGALT00000106096	SIL1	2.30247
												ENSGALT00000106143	ANKLE1	1.69877
												ENSGALT00000106159	ENSGALG00000050180	2.87461
												ENSGALT00000106164	ENSGALG00000053701	1.29384
												ENSGALT00000106166	ENSGALG00000052819	2.86135
												ENSGALT00000106215	ENSGALG00000040371	1.37295
												ENSGALT00000106341	ENSGALG00000051139	2.68899
												ENSGALT00000106343	ENSGALG00000047144	1.19759
												ENSGALT00000106375	ENSGALG00000051586	2.45655
												ENSGALT00000106379	SORBS1	1.29468
												ENSGALT00000106646	ENSGALG00000051252	1.06342
												ENSGALT00000106658	ENSGALG00000051866	1.75504
												ENSGALT00000106696	ENSGALG00000047053	1.65569
												ENSGALT00000106705	NPR2	2.08235
												ENSGALT00000106752	ENSGALG00000049776	1.95412
												ENSGALT00000106815	LNPK	1.02927
												ENSGALT00000106826	SAMSN1	2.80955
												ENSGALT00000106854	GRIP1	1.96655
												ENSGALT00000106871	ENSGALG00000046848	2.27791
												ENSGALT00000106873	ENSGALG00000054902	1.40214
												ENSGALT00000106917	GCLC	1.55906
												ENSGALT00000106999	ENSGALG00000050102	1.24116
												ENSGALT00000107029	DOCK3	1.1293
												ENSGALT00000107045	ENSGALG00000050225	1.58691
												ENSGALT00000107216	ENSGALG00000051237	1.91933
												ENSGALT00000107218	ENSGALG00000052820	1.04509
												ENSGALT00000107344	CD99L2	1.43543
												ENSGALT00000107393	HOOK2	1.30478
												ENSGALT00000107551	INTS10	2.5198
												ENSGALT00000107563	VRK1	2.45047
												ENSGALT00000107571	CFAP70	1.86042
												ENSGALT00000107587	CALN1	1.625
												ENSGALT00000107589	SPRED2	3.65262
												ENSGALT00000107614	ASXL2	1.08352
												ENSGALT00000107652	LZTS2	1.57513
												ENSGALT00000107672	ENSGALG00000054775	1.34411
												ENSGALT00000107678	YEATS2	1.83871
												ENSGALT00000107730	ENSGALG00000053417	1.42079
												ENSGALT00000107742	RNPEP	1.57788
												ENSGALT00000107746	ENSGALG00000002399	1.26809
												ENSGALT00000107758	ENSGALG00000050241	1.28818
												ENSGALT00000107782	VPS26C	2.86084
												ENSGALT00000107862	ENSGALG00000051624	1.66171
												ENSGALT00000107900	ENSGALG00000029446	1.9106
												ENSGALT00000107941	ENSGALG00000049660	1.12369
												ENSGALT00000107953	ENSGALG00000049191	2.17962
												ENSGALT00000108007	ENSGALG00000054912	2.10241
												ENSGALT00000108083	VCAN	1.37906
												ENSGALT00000108097	ENSGALG00000050774	1.84161
												ENSGALT00000108098	OTULIN	4.37957
												ENSGALT00000108104	TA3	1.50992
												ENSGALT00000108105	ENSGALG00000046792	1.04098
												ENSGALT00000108252	ENSGALG00000051046	2.19231
												ENSGALT00000108262	ENSGALG00000052489	1.47249
												ENSGALT00000108364	ENSGALG00000046720	1.85146

## Sheet: lncRNAs
Supplemental Table 2: Cell Type Specific Transcripts and lncRNAs
Sheet 2: lncRNAs
B Cell			Bursa			Ileum			Jejunum			Macrophage (lung)			Monocyte (blood)			Ovary			Proximal Cecum			T cell (spleen)			Thymus
Transcript ID	Gene Name	TPM	Transcript ID	Gene Name	TPM	Transcript ID	Gene Name	TPM	Transcript ID	Gene Name	TPM	Transcript ID	Gene Name	TPM	Transcript ID	Gene Name	TPM	Transcript ID	Gene Name	TPM	Transcript ID	Gene Name	TPM	Transcript ID	Gene Name	TPM	Transcript ID	Gene Name	TPM
ENSGALT00000045498	ENSGALG00000028346	13.8288	ENSGALT00000049819	ENSGALG00000032774	2	ENSGALT00000054488	ENSGALG00000037071	18.5529	ENSGALT00000065024	ENSGALG00000031361	8.20057	ENSGALT00000047804	ENSGALG00000036613	1.09472	ENSGALT00000034549	ENSGALG00000021405	16.2059	ENSGALT00000049634	ENSGALG00000041838	2.67131	ENSGALT00000019758	ENSGALG00000012095	3.71263	ENSGALT00000047572	ENSGALG00000030852	1.09167	ENSGALT00000030617	ENSGALG00000019325	1.15503
ENSGALT00000047640	ENSGALG00000033148	7.51124	ENSGALT00000054314	ENSGALG00000035302	3.43163	ENSGALT00000056725	ENSGALG00000032359	7.79677	ENSGALT00000090822	ENSGALG00000054598	11.9171	ENSGALT00000048761	ENSGALG00000035494	1.03749	ENSGALT00000053100	ENSGALG00000042483	9.1326	ENSGALT00000052537	ENSGALG00000034580	8.27335	ENSGALT00000050547	ENSGALG00000047755	1.95362	ENSGALT00000049927	ENSGALG00000036635	2.6024	ENSGALT00000047049	ENSGALG00000050863	1.41202
ENSGALT00000057927	ENSGALG00000040613	4.8494	ENSGALT00000066716	ENSGALG00000039656	7.73439	ENSGALT00000070566	ENSGALG00000034498	12.4337	ENSGALT00000092198	ENSGALG00000053819	9.42675	ENSGALT00000050337	ENSGALG00000040732	1.51652	ENSGALT00000063949	ENSGALG00000041782	14.8904	ENSGALT00000055007	ENSGALG00000029432	9.01876	ENSGALT00000052485	ENSGALG00000042338	2.40377	ENSGALT00000066916	ENSGALG00000038650	5.41509	ENSGALT00000051616	ENSGALG00000040705	2
ENSGALT00000062533	ENSGALG00000030982	12.9449	ENSGALT00000070713	ENSGALG00000038546	2.53371	ENSGALT00000072802	ENSGALG00000030689	7.90093	ENSGALT00000093378	ENSGALG00000054465	11.5175	ENSGALT00000052686	ENSGALG00000043077	1.74188	ENSGALT00000090523	ENSGALG00000050885	11.8884	ENSGALT00000056308	ENSGALG00000033369	20.7901	ENSGALT00000053559	ENSGALG00000034357	2.40717	ENSGALT00000073896	ENSGALG00000033819	3.72046	ENSGALT00000054393	ENSGALG00000047473	1.10803
ENSGALT00000064624	ENSGALG00000033332	5.32394	ENSGALT00000071757	ENSGALG00000033902	1.41966	ENSGALT00000074628	ENSGALG00000040001	11.5154	ENSGALT00000094894	ENSGALG00000054097	10.0665	ENSGALT00000053319	ENSGALG00000036131	1.29208	ENSGALT00000091676	ENSGALG00000030592	15.1365	ENSGALT00000060731	ENSGALG00000032552	14.8519	ENSGALT00000055681	ENSGALG00000030266	3.59126	ENSGALT00000078384	ENSGALG00000029704	4.74091	ENSGALT00000055656	ENSGALG00000032784	1.44495
ENSGALT00000066961	ENSGALG00000034533	6.91312	ENSGALT00000085508	ENSGALG00000046643	2.1254	ENSGALT00000090567	ENSGALG00000051241	7.42097	ENSGALT00000095694	ENSGALG00000050239	12.9729	ENSGALT00000055124	ENSGALG00000035977	1.94253	ENSGALT00000093179	ENSGALG00000053461	12.3725	ENSGALT00000061044	ENSGALG00000037329	18.7608	ENSGALT00000062885	ENSGALG00000042524	2.19701	ENSGALT00000090524	ENSGALG00000047730	1.26822	ENSGALT00000061680	ENSGALG00000036306	1
ENSGALT00000068202	ENSGALG00000041611	4.2726	ENSGALT00000090431	ENSGALG00000054849	3.02177	ENSGALT00000091076	ENSGALG00000052475	8.55447	ENSGALT00000096814	ENSGALG00000054466	21.9293	ENSGALT00000057447	ENSGALG00000037810	7.10731	ENSGALT00000099547	ENSGALG00000047858	9.61686	ENSGALT00000062018	ENSGALG00000036551	6.20351	ENSGALT00000080388	ENSGALG00000040536	1.3004	ENSGALT00000090991	ENSGALG00000049128	2.77872	ENSGALT00000071249	ENSGALG00000030322	1.24096
ENSGALT00000069473	ENSGALG00000037616	14.0203	ENSGALT00000090477	ENSGALG00000047735	71.1817	ENSGALT00000091139	ENSGALG00000038238	6.36424	ENSGALT00000098155	ENSGALG00000049180	9.78663	ENSGALT00000067304	ENSGALG00000032315	3.32967	ENSGALT00000106736	ENSGALG00000052225	10.3117	ENSGALT00000062420	ENSGALG00000038238	6.47726	ENSGALT00000080483	ENSGALG00000036828	2.69697	ENSGALT00000091000	ENSGALG00000052377	1.42834	ENSGALT00000075576	ENSGALG00000041755	2
ENSGALT00000075923	ENSGALG00000030165	2.37684	ENSGALT00000090612	ENSGALG00000052467	6.78836	ENSGALT00000091767	ENSGALG00000039919	7.46115	ENSGALT00000098678	ENSGALG00000051262	9.14625	ENSGALT00000069103	ENSGALG00000038462	3.18381	ENSGALT00000107540	ENSGALG00000040710	14.8484	ENSGALT00000066421	ENSGALG00000041688	39.3937	ENSGALT00000082046	ENSGALG00000050581	1.59646	ENSGALT00000092523	ENSGALG00000049249	31.247	ENSGALT00000077555	ENSGALG00000029931	6.1326
ENSGALT00000078169	ENSGALG00000036040	1	ENSGALT00000091124	ENSGALG00000049400	4.25529	ENSGALT00000091779	ENSGALG00000053681	7.45944	ENSGALT00000098806	ENSGALG00000049394	8.51067	ENSGALT00000069905	ENSGALG00000042383	1.72772				ENSGALT00000067639	ENSGALG00000030930	1.99783	ENSGALT00000090613	ENSGALG00000031799	1.442	ENSGALT00000092754	ENSGALG00000052516	6.94773	ENSGALT00000081876	ENSGALG00000038873	2.86453
ENSGALT00000078521	ENSGALG00000030566	17.2011	ENSGALT00000091906	ENSGALG00000050104	2	ENSGALT00000091851	ENSGALG00000051292	16.556	ENSGALT00000099034	ENSGALG00000054946	20.2757	ENSGALT00000074449	ENSGALG00000042165	7.18476				ENSGALT00000069126	ENSGALG00000035579	11.1334	ENSGALT00000090888	ENSGALG00000051400	5.12389	ENSGALT00000093155	ENSGALG00000049494	1.12994	ENSGALT00000082192	ENSGALG00000039246	2.12879
ENSGALT00000080532	ENSGALG00000042678	19.4749	ENSGALT00000093216	ENSGALG00000053251	4.98473	ENSGALT00000092182	ENSGALG00000047096	6.43133	ENSGALT00000100444	ENSGALG00000050343	17.8553	ENSGALT00000076614	ENSGALG00000034174	1.7485				ENSGALT00000069430	ENSGALG00000033973	18.1136	ENSGALT00000091111	ENSGALG00000051166	2	ENSGALT00000093329	ENSGALG00000047851	3.069	ENSGALT00000090403	ENSGALG00000051647	2
ENSGALT00000082360	ENSGALG00000038806	3.68182	ENSGALT00000094102	ENSGALG00000052184	5.36164	ENSGALT00000092236	ENSGALG00000053440	11.0568	ENSGALT00000101807	ENSGALG00000047002	35.742	ENSGALT00000086054	ENSGALG00000044618	2.0942				ENSGALT00000070257	ENSGALG00000033055	5.87634	ENSGALT00000091279	ENSGALG00000054927	1.8249	ENSGALT00000093844	ENSGALG00000051433	9.41937	ENSGALT00000090563	ENSGALG00000053979	2.08936
ENSGALT00000090484	ENSGALG00000054899	45.28	ENSGALT00000094161	ENSGALG00000048483	2.31661	ENSGALT00000092238	ENSGALG00000050566	7.48516	ENSGALT00000103806	ENSGALG00000053815	9.65803	ENSGALT00000090716	ENSGALG00000051299	1.26983				ENSGALT00000074343	ENSGALG00000038034	5.0121	ENSGALT00000091306	ENSGALG00000050570	1.34169	ENSGALT00000093979	ENSGALG00000051793	1.61842	ENSGALT00000090917	ENSGALG00000049507	2.93151
ENSGALT00000090485	ENSGALG00000051094	5.75562	ENSGALT00000094325	ENSGALG00000051024	1.81191	ENSGALT00000092997	ENSGALG00000049568	18.8988	ENSGALT00000104006	ENSGALG00000052972	2.87718	ENSGALT00000090755	ENSGALG00000048845	21.7154				ENSGALT00000081409	ENSGALG00000037894	5.30303	ENSGALT00000091418	ENSGALG00000048663	2	ENSGALT00000094158	ENSGALG00000053190	1.86024	ENSGALT00000091073	ENSGALG00000053698	2.66364
ENSGALT00000090652	ENSGALG00000054456	6.07316	ENSGALT00000094547	ENSGALG00000047499	1.89325	ENSGALT00000093131	ENSGALG00000050874	8.22257	ENSGALT00000107075	ENSGALG00000049080	17.5643	ENSGALT00000090788	ENSGALG00000050658	7.58197				ENSGALT00000081999	ENSGALG00000038138	5.61475	ENSGALT00000091642	ENSGALG00000046946	5.99456	ENSGALT00000094684	ENSGALG00000048363	2.48084	ENSGALT00000091440	ENSGALG00000047392	40.0097
ENSGALT00000090776	ENSGALG00000048854	7.11986	ENSGALT00000094597	ENSGALG00000049098	1.9288	ENSGALT00000093514	ENSGALG00000049506	28.9081				ENSGALT00000090836	ENSGALG00000043925	3.28359				ENSGALT00000082208	ENSGALG00000030006	60.5596	ENSGALT00000091720	ENSGALG00000051835	8.55556	ENSGALT00000094990	ENSGALG00000053530	4.78755	ENSGALT00000091465	ENSGALG00000054507	7.22521
ENSGALT00000091137	ENSGALG00000050985	12.8874	ENSGALT00000094618	ENSGALG00000054840	3.22211	ENSGALT00000093717	ENSGALG00000047686	2.44937				ENSGALT00000091106	ENSGALG00000051967	1.13278				ENSGALT00000083614	ENSGALG00000051757	59.3878	ENSGALT00000091781	ENSGALG00000048945	1.76073	ENSGALT00000095056	ENSGALG00000051744	5.71068	ENSGALT00000091648	ENSGALG00000053454	12.928
ENSGALT00000091544	ENSGALG00000049049	11.8226	ENSGALT00000095781	ENSGALG00000036848	3.59108	ENSGALT00000093766	ENSGALG00000054525	13.3862				ENSGALT00000091108	ENSGALG00000046917	6				ENSGALT00000086733	ENSGALG00000054062	5.79528	ENSGALT00000092102	ENSGALG00000051240	2.07749	ENSGALT00000095282	ENSGALG00000047616	1.09783	ENSGALT00000091804	ENSGALG00000053286	1.14661
ENSGALT00000091743	ENSGALG00000047778	12.8636	ENSGALT00000095853	ENSGALG00000048627	5.84971	ENSGALT00000093804	ENSGALG00000046841	20.929				ENSGALT00000091126	ENSGALG00000048694	5.19224				ENSGALT00000086749	ENSGALG00000044447	38.57	ENSGALT00000093492	ENSGALG00000051542	6.57299	ENSGALT00000095448	ENSGALG00000033902	1.22535	ENSGALT00000091958	ENSGALG00000053671	1
ENSGALT00000091935	ENSGALG00000053591	8.20161	ENSGALT00000096038	ENSGALG00000047094	5.87552	ENSGALT00000094344	ENSGALG00000050355	8.85523				ENSGALT00000091284	ENSGALG00000053606	1.46383				ENSGALT00000088038	ENSGALG00000044794	22.1995	ENSGALT00000094127	ENSGALG00000047054	1.36868	ENSGALT00000095580	ENSGALG00000048276	1.67176	ENSGALT00000092440	ENSGALG00000051940	1.99573
ENSGALT00000091964	ENSGALG00000052040	14.3891	ENSGALT00000096200	ENSGALG00000046857	4.93545	ENSGALT00000095761	ENSGALG00000055119	5.22709				ENSGALT00000091382	ENSGALG00000054934	18.5739				ENSGALT00000088423	ENSGALG00000044565	68.347	ENSGALT00000094226	ENSGALG00000052618	3	ENSGALT00000095843	ENSGALG00000048892	4.75615	ENSGALT00000092469	ENSGALG00000049264	1.17005
ENSGALT00000092502	ENSGALG00000052148	9.9512	ENSGALT00000096222	ENSGALG00000053786	14.6278	ENSGALT00000096788	ENSGALG00000055096	11.1507				ENSGALT00000091506	ENSGALG00000053305	4.85389				ENSGALT00000088989	ENSGALG00000045167	11.7423	ENSGALT00000094231	ENSGALG00000052107	1.77704	ENSGALT00000095975	ENSGALG00000054093	2	ENSGALT00000092767	ENSGALG00000051689	1.81856
ENSGALT00000092578	ENSGALG00000048824	2.53806	ENSGALT00000097124	ENSGALG00000046871	2.37406	ENSGALT00000097370	ENSGALG00000051449	13.9108				ENSGALT00000091528	ENSGALG00000049975	5.90942				ENSGALT00000089710	ENSGALG00000047057	13.6124	ENSGALT00000094718	ENSGALG00000051499	3	ENSGALT00000095985	ENSGALG00000048540	1.31111	ENSGALT00000093372	ENSGALG00000048748	2.66667
ENSGALT00000092703	ENSGALG00000052138	6.6027	ENSGALT00000097814	ENSGALG00000048060	1.69369	ENSGALT00000098098	ENSGALG00000051195	9.3053				ENSGALT00000091534	ENSGALG00000048000	1.70325				ENSGALT00000090398	ENSGALG00000054790	19.7415	ENSGALT00000095103	ENSGALG00000054128	1.88326	ENSGALT00000096149	ENSGALG00000048956	1.21898	ENSGALT00000093634	ENSGALG00000049809	2.366
ENSGALT00000092762	ENSGALG00000047991	15.7638	ENSGALT00000098974	ENSGALG00000049262	1.62006	ENSGALT00000098144	ENSGALG00000049006	19.6204				ENSGALT00000091672	ENSGALG00000043388	3.58951				ENSGALT00000090466	ENSGALG00000048071	7.52015	ENSGALT00000095867	ENSGALG00000047853	1.61162	ENSGALT00000096212	ENSGALG00000047326	12.2893	ENSGALT00000093924	ENSGALG00000042483	3.15402
ENSGALT00000092980	ENSGALG00000048720	5.95406	ENSGALT00000099623	ENSGALG00000052858	2.88071	ENSGALT00000098178	ENSGALG00000053271	14.592				ENSGALT00000091760	ENSGALG00000048647	3.93363				ENSGALT00000090510	ENSGALG00000051227	9.56803	ENSGALT00000097864	ENSGALG00000046781	1.89904	ENSGALT00000096334	ENSGALG00000048928	8.86667	ENSGALT00000094393	ENSGALG00000050916	1.80398
ENSGALT00000093647	ENSGALG00000053462	10.5969	ENSGALT00000099734	ENSGALG00000053714	5.45463	ENSGALT00000098528	ENSGALG00000050914	13.6048				ENSGALT00000091806	ENSGALG00000052953	5.26688				ENSGALT00000090548	ENSGALG00000049857	27.6692	ENSGALT00000097913	ENSGALG00000049675	1.37459	ENSGALT00000096456	ENSGALG00000048327	2	ENSGALT00000094430	ENSGALG00000031651	1.21151
ENSGALT00000093666	ENSGALG00000052219	19.3484	ENSGALT00000099836	ENSGALG00000050453	1.23705	ENSGALT00000098689	ENSGALG00000029796	9.51028				ENSGALT00000091835	ENSGALG00000050348	1.03563				ENSGALT00000090635	ENSGALG00000048643	5.97484	ENSGALT00000098093	ENSGALG00000053416	2.34142	ENSGALT00000096689	ENSGALG00000050465	5.6209	ENSGALT00000094479	ENSGALG00000049733	5.41779
ENSGALT00000093890	ENSGALG00000048559	5	ENSGALT00000099873	ENSGALG00000048386	2.41823	ENSGALT00000098773	ENSGALG00000054007	6.48456				ENSGALT00000092287	ENSGALG00000052785	6.16307				ENSGALT00000090636	ENSGALG00000048218	20.5359	ENSGALT00000098273	ENSGALG00000049946	1.66229	ENSGALT00000096864	ENSGALG00000048438	2.86495	ENSGALT00000094959	ENSGALG00000049761	1.47333
ENSGALT00000093899	ENSGALG00000050512	5.84675	ENSGALT00000100297	ENSGALG00000051673	6	ENSGALT00000099325	ENSGALG00000051394	12.2034				ENSGALT00000092302	ENSGALG00000046882	1.92908				ENSGALT00000090657	ENSGALG00000054454	19.9102	ENSGALT00000098275	ENSGALG00000044817	10.1117	ENSGALT00000097215	ENSGALG00000053394	10.7193	ENSGALT00000095113	ENSGALG00000051160	2.20075
ENSGALT00000093978	ENSGALG00000046723	5.26699	ENSGALT00000100442	ENSGALG00000048836	16.1492	ENSGALT00000099428	ENSGALG00000052135	27.0058				ENSGALT00000092383	ENSGALG00000048747	1.72412				ENSGALT00000090742	ENSGALG00000049375	50.3527	ENSGALT00000098316	ENSGALG00000050305	1.89754	ENSGALT00000097398	ENSGALG00000053060	4.81512	ENSGALT00000095601	ENSGALG00000036780	17.3007
ENSGALT00000094020	ENSGALG00000048801	10.2373	ENSGALT00000100946	ENSGALG00000048118	3.28972	ENSGALT00000099519	ENSGALG00000051491	6.92354				ENSGALT00000092444	ENSGALG00000024288	3.75636				ENSGALT00000090749	ENSGALG00000054970	9.95983	ENSGALT00000098906	ENSGALG00000053970	2.1528	ENSGALT00000097445	ENSGALG00000054222	8.39385	ENSGALT00000095624	ENSGALG00000049062	1.06316
ENSGALT00000094423	ENSGALG00000053496	6.77977	ENSGALT00000100990	ENSGALG00000051017	2.30912	ENSGALT00000099520	ENSGALG00000052473	8.63333				ENSGALT00000092504	ENSGALG00000051448	3.832				ENSGALT00000090813	ENSGALG00000050592	8.52086	ENSGALT00000099103	ENSGALG00000047852	1.66234	ENSGALT00000097533	ENSGALG00000050904	5.75701	ENSGALT00000095790	ENSGALG00000051059	2.99421
ENSGALT00000094427	ENSGALG00000053923	4.85754	ENSGALT00000101047	ENSGALG00000048182	4.98986	ENSGALT00000100489	ENSGALG00000053563	1				ENSGALT00000092529	ENSGALG00000050793	13.2538				ENSGALT00000090930	ENSGALG00000041690	2.94883	ENSGALT00000099176	ENSGALG00000050370	5.24855	ENSGALT00000097724	ENSGALG00000048850	10.0724	ENSGALT00000095918	ENSGALG00000049107	3.655
ENSGALT00000094673	ENSGALG00000050529	17.9089	ENSGALT00000101054	ENSGALG00000046768	1.76446	ENSGALT00000100962	ENSGALG00000047562	15.0408				ENSGALT00000092534	ENSGALG00000054508	2.13184				ENSGALT00000090938	ENSGALG00000047384	13.6561	ENSGALT00000100362	ENSGALG00000050196	1.67476	ENSGALT00000097842	ENSGALG00000049760	1.93908	ENSGALT00000096022	ENSGALG00000051384	1.08109
ENSGALT00000094899	ENSGALG00000052644	7.53581	ENSGALT00000101965	ENSGALG00000052570	3.00925	ENSGALT00000101836	ENSGALG00000047398	56.1702				ENSGALT00000092604	ENSGALG00000050766	1.22324				ENSGALT00000090955	ENSGALG00000046942	5.03759	ENSGALT00000101331	ENSGALG00000049902	1.46251	ENSGALT00000097914	ENSGALG00000052451	4.56236	ENSGALT00000096075	ENSGALG00000052843	3
ENSGALT00000094937	ENSGALG00000055065	17.653	ENSGALT00000102227	ENSGALG00000054038	12.5133	ENSGALT00000102020	ENSGALG00000054970	9.34724				ENSGALT00000092688	ENSGALG00000052323	7.86874				ENSGALT00000091012	ENSGALG00000054088	8.32256	ENSGALT00000101603	ENSGALG00000051634	2.49695	ENSGALT00000098146	ENSGALG00000053066	6.68697	ENSGALT00000096280	ENSGALG00000030266	2.05808
ENSGALT00000095224	ENSGALG00000054726	5.26883	ENSGALT00000103090	ENSGALG00000050885	1.94748	ENSGALT00000102232	ENSGALG00000053401	7.0774				ENSGALT00000092931	ENSGALG00000046778	1.0444				ENSGALT00000091039	ENSGALG00000050339	20.4953	ENSGALT00000101848	ENSGALG00000034498	4.78201	ENSGALT00000098225	ENSGALG00000046816	8.731	ENSGALT00000096308	ENSGALG00000048413	1.82675
ENSGALT00000095526	ENSGALG00000053167	7.10577	ENSGALT00000103412	ENSGALG00000043388	6.00958	ENSGALT00000102252	ENSGALG00000051499	9.92677				ENSGALT00000092977	ENSGALG00000054169	5.83989				ENSGALT00000091135	ENSGALG00000018702	12.4713	ENSGALT00000101874	ENSGALG00000045154	1.64792	ENSGALT00000098346	ENSGALG00000047368	5.58097	ENSGALT00000096446	ENSGALG00000050534	2.63673
ENSGALT00000095838	ENSGALG00000049406	5.69099	ENSGALT00000103525	ENSGALG00000053786	15.8522	ENSGALT00000102596	ENSGALG00000054886	12.4388				ENSGALT00000093020	ENSGALG00000053429	5.07692				ENSGALT00000091177	ENSGALG00000052574	2.64256	ENSGALT00000102047	ENSGALG00000046854	2	ENSGALT00000098907	ENSGALG00000050007	2.04043	ENSGALT00000096506	ENSGALG00000052744	1.54611
ENSGALT00000096027	ENSGALG00000051590	6.45318	ENSGALT00000103646	ENSGALG00000050007	2.97932	ENSGALT00000102826	ENSGALG00000052990	7.68628				ENSGALT00000093043	ENSGALG00000050776	6.63483				ENSGALT00000091247	ENSGALG00000052794	6.74044	ENSGALT00000102486	ENSGALG00000051780	1.73583	ENSGALT00000098911	ENSGALG00000051384	2.70812	ENSGALT00000096694	ENSGALG00000052378	1.36047
ENSGALT00000096203	ENSGALG00000055124	4.84976	ENSGALT00000104081	ENSGALG00000047107	3.50063	ENSGALT00000103174	ENSGALG00000051064	9.52714				ENSGALT00000093078	ENSGALG00000051786	4.79501				ENSGALT00000091280	ENSGALG00000051501	11.4644	ENSGALT00000103030	ENSGALG00000050829	3.91999	ENSGALT00000098973	ENSGALG00000052255	1.02931	ENSGALT00000097196	ENSGALG00000052785	1.35526
ENSGALT00000096338	ENSGALG00000050849	5.30201	ENSGALT00000104136	ENSGALG00000053473	14.6243	ENSGALT00000103262	ENSGALG00000053205	13.6852				ENSGALT00000093237	ENSGALG00000050729	8.11045				ENSGALT00000091318	ENSGALG00000053906	12.6516	ENSGALT00000103421	ENSGALG00000054696	1.55479	ENSGALT00000099193	ENSGALG00000048994	13.4373	ENSGALT00000097218	ENSGALG00000049598	9.33434
ENSGALT00000096440	ENSGALG00000047950	12.5501	ENSGALT00000104267	ENSGALG00000053085	6.6832	ENSGALT00000103766	ENSGALG00000034236	9.01704				ENSGALT00000093394	ENSGALG00000053097	5.12453				ENSGALT00000091320	ENSGALG00000047413	5.60901	ENSGALT00000103745	ENSGALG00000053062	1.75178	ENSGALT00000099224	ENSGALG00000052245	27.0539	ENSGALT00000097393	ENSGALG00000041690	1.11865
ENSGALT00000096571	ENSGALG00000051838	54.0277	ENSGALT00000104420	ENSGALG00000047012	1.97368	ENSGALT00000103911	ENSGALG00000048408	29.2298				ENSGALT00000093444	ENSGALG00000053017	19.1957				ENSGALT00000091427	ENSGALG00000054816	20.2941	ENSGALT00000103954	ENSGALG00000046813	1.64051	ENSGALT00000099540	ENSGALG00000053286	3.42623	ENSGALT00000097756	ENSGALG00000049697	2
ENSGALT00000096573	ENSGALG00000053256	10.7691	ENSGALT00000104725	ENSGALG00000053125	1.7937	ENSGALT00000104116	ENSGALG00000053117	11.8602				ENSGALT00000093472	ENSGALG00000047649	10.4376				ENSGALT00000091494	ENSGALG00000051785	9.70074	ENSGALT00000104572	ENSGALG00000047251	1.26316	ENSGALT00000099582	ENSGALG00000050751	159.957	ENSGALT00000098037	ENSGALG00000048891	17.1708
ENSGALT00000096832	ENSGALG00000050129	10.484	ENSGALT00000104925	ENSGALG00000049123	5.4688	ENSGALT00000104146	ENSGALG00000050370	10.2577				ENSGALT00000093536	ENSGALG00000049224	1.18804				ENSGALT00000091556	ENSGALG00000049518	14.8593	ENSGALT00000104629	ENSGALG00000052249	1.95035	ENSGALT00000099808	ENSGALG00000051116	1.35759	ENSGALT00000098229	ENSGALG00000048328	2.38845
ENSGALT00000097375	ENSGALG00000049974	4.99026	ENSGALT00000105308	ENSGALG00000048523	2.32552	ENSGALT00000104335	ENSGALG00000047067	12.9969				ENSGALT00000093653	ENSGALG00000043392	4.55584				ENSGALT00000091557	ENSGALG00000050385	11.9548	ENSGALT00000104943	ENSGALG00000053572	5.85102	ENSGALT00000099973	ENSGALG00000054429	2.88778	ENSGALT00000098231	ENSGALG00000053688	7.67114
ENSGALT00000097621	ENSGALG00000052940	4.91331	ENSGALT00000106200	ENSGALG00000047852	1.93013	ENSGALT00000104543	ENSGALG00000051195	9.69188				ENSGALT00000093773	ENSGALG00000049312	4.79997				ENSGALT00000091584	ENSGALG00000048688	9.52151	ENSGALT00000105114	ENSGALG00000048018	2.42278	ENSGALT00000100150	ENSGALG00000047147	4.97368	ENSGALT00000098334	ENSGALG00000048202	1.33707
ENSGALT00000097700	ENSGALG00000054899	25.3191	ENSGALT00000106201	ENSGALG00000048050	1.61184	ENSGALT00000105122	ENSGALG00000053138	8.44922				ENSGALT00000094048	ENSGALG00000049988	6.12883				ENSGALT00000091628	ENSGALG00000048256	12.6921	ENSGALT00000105983	ENSGALG00000049596	2.67951	ENSGALT00000100311	ENSGALG00000050044	5.20915	ENSGALT00000098486	ENSGALG00000049702	6.09337
ENSGALT00000097799	ENSGALG00000053208	3.97286	ENSGALT00000106331	ENSGALG00000050348	2.72119	ENSGALT00000105154	ENSGALG00000053336	6.19011				ENSGALT00000094249	ENSGALG00000047600	5.49763				ENSGALT00000091652	ENSGALG00000053610	5.69828	ENSGALT00000106357	ENSGALG00000048418	7.52551	ENSGALT00000101317	ENSGALG00000054179	2	ENSGALT00000098602	ENSGALG00000052291	5.02235
ENSGALT00000098035	ENSGALG00000049429	6.91873	ENSGALT00000107776	ENSGALG00000054708	18.3959	ENSGALT00000105546	ENSGALG00000048060	7.39962				ENSGALT00000094497	ENSGALG00000050318	14.4052				ENSGALT00000091675	ENSGALG00000050968	10.5951	ENSGALT00000107301	ENSGALG00000050487	1.34896	ENSGALT00000101442	ENSGALG00000037919	1.81155	ENSGALT00000098763	ENSGALG00000052147	2
ENSGALT00000098050	ENSGALG00000052967	11.8081	ENSGALT00000107929	ENSGALG00000051057	2	ENSGALT00000106137	ENSGALG00000051600	7.43487				ENSGALT00000094544	ENSGALG00000047410	3.79824				ENSGALT00000091687	ENSGALG00000054480	5.16782	ENSGALT00000107716	ENSGALG00000054570	10.9148	ENSGALT00000101893	ENSGALG00000051379	1.35687	ENSGALT00000098835	ENSGALG00000053873	1.62766
ENSGALT00000098051	ENSGALG00000052549	8.41882	ENSGALT00000107959	ENSGALG00000051591	1.96226	ENSGALT00000106454	ENSGALG00000048632	10.5464				ENSGALT00000094663	ENSGALG00000050237	5.54938				ENSGALT00000091810	ENSGALG00000050461	64.9962	ENSGALT00000108013	ENSGALG00000053282	6.9417	ENSGALT00000101929	ENSGALG00000048123	13.2918	ENSGALT00000098971	ENSGALG00000049079	9.55403
ENSGALT00000098615	ENSGALG00000051315	10.1298	ENSGALT00000108156	ENSGALG00000030930	1.6434	ENSGALT00000106857	ENSGALG00000052579	71.893				ENSGALT00000094703	ENSGALG00000049161	5.21799				ENSGALT00000091849	ENSGALG00000054312	8.00134				ENSGALT00000101940	ENSGALG00000054875	4.92955	ENSGALT00000099236	ENSGALG00000051457	1.47059
ENSGALT00000099342	ENSGALG00000041847	25.9018				ENSGALT00000107234	ENSGALG00000052446	30.2531				ENSGALT00000094811	ENSGALG00000049386	5.12315				ENSGALT00000091861	ENSGALG00000055005	13.9383				ENSGALT00000103550	ENSGALG00000051498	1.82482	ENSGALT00000099361	ENSGALG00000048836	1.21404
ENSGALT00000099491	ENSGALG00000050121	5.68806				ENSGALT00000107561	ENSGALG00000054719	17.1417				ENSGALT00000094842	ENSGALG00000048023	10.54				ENSGALT00000091886	ENSGALG00000054168	43.6838				ENSGALT00000104215	ENSGALG00000054552	4.43866	ENSGALT00000099369	ENSGALG00000053342	10.3956
ENSGALT00000099584	ENSGALG00000054540	10.2107				ENSGALT00000107908	ENSGALG00000052617	8.21684				ENSGALT00000094940	ENSGALG00000051662	4.04972				ENSGALT00000092009	ENSGALG00000049350	18.7505				ENSGALT00000104269	ENSGALG00000054105	1.10132	ENSGALT00000099558	ENSGALG00000055140	2.1732
ENSGALT00000099732	ENSGALG00000047851	9.75277				ENSGALT00000107950	ENSGALG00000051368	7.35206				ENSGALT00000095412	ENSGALG00000054838	3.70489				ENSGALT00000092023	ENSGALG00000047932	5.70515				ENSGALT00000104291	ENSGALG00000051642	1.38363	ENSGALT00000099559	ENSGALG00000029566	3.30525
ENSGALT00000099876	ENSGALG00000054893	5.2731				ENSGALT00000108001	ENSGALG00000050423	15.3556				ENSGALT00000095578	ENSGALG00000046764	5.17483				ENSGALT00000092139	ENSGALG00000052001	7.99354				ENSGALT00000104542	ENSGALG00000050892	4.90252	ENSGALT00000099649	ENSGALG00000047883	1.02984
ENSGALT00000099900	ENSGALG00000048424	12.1407				ENSGALT00000108010	ENSGALG00000048848	18.8824				ENSGALT00000095715	ENSGALG00000052245	46.6054				ENSGALT00000092177	ENSGALG00000053166	15.6734				ENSGALT00000104832	ENSGALG00000050844	6.49612	ENSGALT00000099904	ENSGALG00000054631	8.95277
ENSGALT00000100674	ENSGALG00000049384	7.49346				ENSGALT00000108030	ENSGALG00000049566	7.75945				ENSGALT00000095737	ENSGALG00000053874	1.43646				ENSGALT00000092185	ENSGALG00000052958	35.3716				ENSGALT00000105105	ENSGALG00000048680	3.56514	ENSGALT00000100254	ENSGALG00000049568	1.83333
ENSGALT00000100810	ENSGALG00000055103	8.95511										ENSGALT00000095882	ENSGALG00000048171	1.37427				ENSGALT00000092224	ENSGALG00000053952	5.81005				ENSGALT00000105284	ENSGALG00000051112	8.23605	ENSGALT00000100760	ENSGALG00000047247	14.7957
ENSGALT00000100843	ENSGALG00000051395	4.55252										ENSGALT00000096091	ENSGALG00000053635	1.86813				ENSGALT00000092254	ENSGALG00000047615	13.6234				ENSGALT00000105505	ENSGALG00000047576	6.96302	ENSGALT00000101068	ENSGALG00000047530	1.52454
ENSGALT00000100940	ENSGALG00000047826	6.31274										ENSGALT00000096318	ENSGALG00000054551	1.07968				ENSGALT00000092278	ENSGALG00000036522	5.43276				ENSGALT00000105608	ENSGALG00000048916	5.19048	ENSGALT00000101389	ENSGALG00000050667	14.5355
ENSGALT00000101878	ENSGALG00000049836	5.7234										ENSGALT00000096367	ENSGALG00000051096	8.72409				ENSGALT00000092308	ENSGALG00000050911	7.55428				ENSGALT00000105758	ENSGALG00000048080	4.93702	ENSGALT00000101473	ENSGALG00000053458	2.86832
ENSGALT00000102284	ENSGALG00000053348	21.8274										ENSGALT00000096537	ENSGALG00000031075	2.81587				ENSGALT00000092326	ENSGALG00000047815	5.0073				ENSGALT00000105786	ENSGALG00000049002	2.65578	ENSGALT00000101536	ENSGALG00000046706	5.42348
ENSGALT00000102335	ENSGALG00000051873	4.62004										ENSGALT00000097030	ENSGALG00000053686	1.71373				ENSGALT00000092334	ENSGALG00000052175	1.90504				ENSGALT00000105944	ENSGALG00000048719	5.03316	ENSGALT00000101784	ENSGALG00000047951	1.04253
ENSGALT00000102399	ENSGALG00000054456	11.0452										ENSGALT00000097107	ENSGALG00000054507	5.40789				ENSGALT00000092357	ENSGALG00000050601	5.9276				ENSGALT00000106082	ENSGALG00000051024	5.4425	ENSGALT00000102069	ENSGALG00000051794	12.2523
ENSGALT00000102547	ENSGALG00000048595	10.8906										ENSGALT00000097175	ENSGALG00000049657	2.06825				ENSGALT00000092381	ENSGALG00000053369	10.8231				ENSGALT00000106794	ENSGALG00000050244	2.85203	ENSGALT00000102087	ENSGALG00000051219	6.22321
ENSGALT00000102656	ENSGALG00000053746	13.6153										ENSGALT00000097205	ENSGALG00000047974	1.71107				ENSGALT00000092417	ENSGALG00000053495	11.9268				ENSGALT00000107031	ENSGALG00000048914	1.4196	ENSGALT00000102175	ENSGALG00000053924	1.29514
ENSGALT00000103389	ENSGALG00000051196	9.53092										ENSGALT00000097447	ENSGALG00000034549	1.76596				ENSGALT00000092433	ENSGALG00000053263	16.5264				ENSGALT00000107255	ENSGALG00000047576	6.47236	ENSGALT00000102214	ENSGALG00000041611	3.37075
ENSGALT00000103562	ENSGALG00000049238	4.78163										ENSGALT00000097940	ENSGALG00000052179	1.82404				ENSGALT00000092503	ENSGALG00000053447	6.34572				ENSGALT00000107951	ENSGALG00000053123	4.85832	ENSGALT00000102755	ENSGALG00000051447	1.78835
ENSGALT00000103924	ENSGALG00000053208	4.34971										ENSGALT00000097966	ENSGALG00000054593	1.95921				ENSGALT00000092508	ENSGALG00000052950	18.2189				ENSGALT00000108219	ENSGALG00000052212	2.17776	ENSGALT00000102836	ENSGALG00000049141	2.98734
ENSGALT00000104250	ENSGALG00000050038	4.88349										ENSGALT00000098169	ENSGALG00000048030	2.08523				ENSGALT00000092545	ENSGALG00000051165	4.98337							ENSGALT00000103089	ENSGALG00000052403	4.75867
ENSGALT00000104702	ENSGALG00000054331	6.78756										ENSGALT00000098242	ENSGALG00000054479	6.21269				ENSGALT00000092572	ENSGALG00000050633	12.3915							ENSGALT00000103220	ENSGALG00000052444	2.17678
ENSGALT00000104729	ENSGALG00000049423	26.9541										ENSGALT00000098302	ENSGALG00000054436	1.47196				ENSGALT00000092592	ENSGALG00000052372	7.19194							ENSGALT00000103241	ENSGALG00000049095	4.24415
ENSGALT00000104739	ENSGALG00000052272	5.88144										ENSGALT00000098474	ENSGALG00000048411	1.38235				ENSGALT00000092619	ENSGALG00000049890	8.32609							ENSGALT00000103373	ENSGALG00000046894	3.89447
ENSGALT00000104867	ENSGALG00000049841	6.87101										ENSGALT00000098583	ENSGALG00000048797	13.4993				ENSGALT00000092620	ENSGALG00000050492	1.77776							ENSGALT00000104463	ENSGALG00000054524	5.79394
ENSGALT00000105044	ENSGALG00000054116	6.19821										ENSGALT00000098597	ENSGALG00000048041	15.5498				ENSGALT00000092723	ENSGALG00000049560	9.66893							ENSGALT00000104525	ENSGALG00000054541	2.18157
ENSGALT00000105181	ENSGALG00000049423	29.6506										ENSGALT00000098886	ENSGALG00000041960	2.5064				ENSGALT00000092729	ENSGALG00000049661	5.36646							ENSGALT00000104639	ENSGALG00000053508	29.8337
ENSGALT00000105442	ENSGALG00000037070	6.5041										ENSGALT00000099237	ENSGALG00000053482	5.60143				ENSGALT00000092736	ENSGALG00000054647	4.44619							ENSGALT00000104670	ENSGALG00000048514	13.8822
ENSGALT00000105762	ENSGALG00000048533	8.71312										ENSGALT00000099260	ENSGALG00000029735	5.64854				ENSGALT00000092772	ENSGALG00000054092	2.01147							ENSGALT00000105165	ENSGALG00000052466	1.105
ENSGALT00000105928	ENSGALG00000053494	4.28809										ENSGALT00000099267	ENSGALG00000052181	9.56591				ENSGALT00000092774	ENSGALG00000054794	31.7822							ENSGALT00000105187	ENSGALG00000047296	4.07634
ENSGALT00000105951	ENSGALG00000047892	11.882										ENSGALT00000099275	ENSGALG00000053498	20.4485				ENSGALT00000092801	ENSGALG00000054355	12.256							ENSGALT00000105687	ENSGALG00000050542	0.621995
ENSGALT00000106078	ENSGALG00000047868	5.80345										ENSGALT00000099278	ENSGALG00000047092	7.8516				ENSGALT00000092859	ENSGALG00000052186	6.01402							ENSGALT00000105881	ENSGALG00000054806	5.12816
ENSGALT00000106116	ENSGALG00000048928	4.96644										ENSGALT00000099322	ENSGALG00000050299	2.74574				ENSGALT00000092861	ENSGALG00000047076	6.84516							ENSGALT00000106098	ENSGALG00000052047	6.11084
ENSGALT00000106256	ENSGALG00000048062	5.28734										ENSGALT00000099448	ENSGALG00000047583	25.104				ENSGALT00000092925	ENSGALG00000053366	7.51129							ENSGALT00000106518	ENSGALG00000049441	2.35055
ENSGALT00000106382	ENSGALG00000052555	21.7213										ENSGALT00000099451	ENSGALG00000040001	2.12795				ENSGALT00000093002	ENSGALG00000049600	12.9181							ENSGALT00000106645	ENSGALG00000047571	1.58434
ENSGALT00000106414	ENSGALG00000048351	3.91116										ENSGALT00000099549	ENSGALG00000051271	1.36496				ENSGALT00000093026	ENSGALG00000054529	14.4639							ENSGALT00000106716	ENSGALG00000029853	2.36516
ENSGALT00000106569	ENSGALG00000048667	5.91235										ENSGALT00000099745	ENSGALG00000047780	5.05689				ENSGALT00000093029	ENSGALG00000044565	23.3937							ENSGALT00000106887	ENSGALG00000049894	20.1333
ENSGALT00000106960	ENSGALG00000051548	5.80272										ENSGALT00000099804	ENSGALG00000053150	1.2596				ENSGALT00000093035	ENSGALG00000049081	8.23419							ENSGALT00000107526	ENSGALG00000046806	2.34314
ENSGALT00000107170	ENSGALG00000048595	7.90257										ENSGALT00000099813	ENSGALG00000050381	2.04627				ENSGALT00000093056	ENSGALG00000051051	30.3599							ENSGALT00000107648	ENSGALG00000048468	7.86517
ENSGALT00000107326	ENSGALG00000033758	5.1729										ENSGALT00000099828	ENSGALG00000054815	3.70765				ENSGALT00000093079	ENSGALG00000047853	13.3194							ENSGALT00000107669	ENSGALG00000053820	3.51814
ENSGALT00000107465	ENSGALG00000050162	434.202										ENSGALT00000099952	ENSGALG00000050062	10.0243				ENSGALT00000093083	ENSGALG00000050124	6.7481							ENSGALT00000108165	ENSGALG00000055123	2.2987
ENSGALT00000107512	ENSGALG00000046782	4.91768										ENSGALT00000099962	ENSGALG00000052420	2.02456				ENSGALT00000093087	ENSGALG00000048017	5.39652
ENSGALT00000107630	ENSGALG00000048213	6.41468										ENSGALT00000099963	ENSGALG00000053295	2.59649				ENSGALT00000093104	ENSGALG00000047124	30.8785
ENSGALT00000107912	ENSGALG00000051208	4.28364										ENSGALT00000100190	ENSGALG00000050998	2				ENSGALT00000093120	ENSGALG00000052335	11.9913
ENSGALT00000107938	ENSGALG00000051179	7.36693										ENSGALT00000100196	ENSGALG00000047282	5.35531				ENSGALT00000093215	ENSGALG00000050140	5.49258
ENSGALT00000108151	ENSGALG00000047950	13.4496										ENSGALT00000100209	ENSGALG00000047887	11				ENSGALT00000093229	ENSGALG00000030029	6.31801
ENSGALT00000108213	ENSGALG00000049914	17.207										ENSGALT00000100326	ENSGALG00000048334	1.38638				ENSGALT00000093241	ENSGALG00000049500	7.41428
												ENSGALT00000100337	ENSGALG00000051909	2.02924				ENSGALT00000093243	ENSGALG00000049059	6.73116
												ENSGALT00000100389	ENSGALG00000047655	8.03674				ENSGALT00000093293	ENSGALG00000047387	8.89327
												ENSGALT00000100818	ENSGALG00000031045	2.04914				ENSGALT00000093305	ENSGALG00000052852	40.3788
												ENSGALT00000100947	ENSGALG00000050848	2.40446				ENSGALT00000093344	ENSGALG00000049866	2.60598
												ENSGALT00000101120	ENSGALG00000054581	20.7848				ENSGALT00000093346	ENSGALG00000049428	11.6139
												ENSGALT00000101280	ENSGALG00000041755	1.76155				ENSGALT00000093349	ENSGALG00000046892	8.35356
												ENSGALT00000101298	ENSGALG00000048801	12.6687				ENSGALT00000093373	ENSGALG00000053433	11.7191
												ENSGALT00000101424	ENSGALG00000051813	5.59649				ENSGALT00000093399	ENSGALG00000053177	19.9921
												ENSGALT00000101468	ENSGALG00000053324	4.9962				ENSGALT00000093432	ENSGALG00000050382	6.27234
												ENSGALT00000101744	ENSGALG00000051691	8.50243				ENSGALT00000093457	ENSGALG00000052544	5.62136
												ENSGALT00000101838	ENSGALG00000049698	6.62282				ENSGALT00000093506	ENSGALG00000054747	5.13055
												ENSGALT00000101880	ENSGALG00000054683	2.37028				ENSGALT00000093529	ENSGALG00000049729	12.4395
												ENSGALT00000102016	ENSGALG00000050808	2.02919				ENSGALT00000093604	ENSGALG00000051017	10.4925
												ENSGALT00000102033	ENSGALG00000050766	5.57933				ENSGALT00000093644	ENSGALG00000050735	8.01509
												ENSGALT00000102065	ENSGALG00000047085	2.06493				ENSGALT00000093727	ENSGALG00000052220	27.1876
												ENSGALT00000102089	ENSGALG00000051849	1.91061				ENSGALT00000093734	ENSGALG00000054745	23.5783
												ENSGALT00000102091	ENSGALG00000047410	43.2824				ENSGALT00000093749	ENSGALG00000053253	15.3159
												ENSGALT00000102101	ENSGALG00000046940	6.44247				ENSGALT00000093781	ENSGALG00000046878	80.8085
												ENSGALT00000102146	ENSGALG00000055039	4.81162				ENSGALT00000093790	ENSGALG00000050387	9.51823
												ENSGALT00000102154	ENSGALG00000050077	4.91756				ENSGALT00000093830	ENSGALG00000049078	6.35432
												ENSGALT00000102436	ENSGALG00000047905	2.58387				ENSGALT00000093871	ENSGALG00000047626	39.5131
												ENSGALT00000102448	ENSGALG00000053133	1.18933				ENSGALT00000093893	ENSGALG00000051524	5.23158
												ENSGALT00000102466	ENSGALG00000052807	2.62245				ENSGALT00000093922	ENSGALG00000047501	6.33237
												ENSGALT00000102694	ENSGALG00000037194	3.53199				ENSGALT00000093938	ENSGALG00000048357	8.52055
												ENSGALT00000102852	ENSGALG00000048790	2.68801				ENSGALT00000093949	ENSGALG00000039105	15.9196
												ENSGALT00000102975	ENSGALG00000053804	19.2218				ENSGALT00000093977	ENSGALG00000047876	14.0513
												ENSGALT00000103290	ENSGALG00000054681	1.38916				ENSGALT00000094012	ENSGALG00000053709	21.7271
												ENSGALT00000103295	ENSGALG00000053972	1.76858				ENSGALT00000094053	ENSGALG00000051772	1.48921
												ENSGALT00000103330	ENSGALG00000050766	6.23782				ENSGALT00000094137	ENSGALG00000047692	48.9987
												ENSGALT00000103334	ENSGALG00000047369	7.0704				ENSGALT00000094141	ENSGALG00000054058	10.0633
												ENSGALT00000103342	ENSGALG00000047891	3.17887				ENSGALT00000094215	ENSGALG00000048174	4.98229
												ENSGALT00000103390	ENSGALG00000052960	2.03153				ENSGALT00000094236	ENSGALG00000054265	8.24245
												ENSGALT00000103474	ENSGALG00000045985	5.16915				ENSGALT00000094250	ENSGALG00000054693	8.93337
												ENSGALT00000103848	ENSGALG00000053066	4.77729				ENSGALT00000094311	ENSGALG00000033767	66.1024
												ENSGALT00000103849	ENSGALG00000046683	8.51644				ENSGALT00000094324	ENSGALG00000050706	22.7452
												ENSGALT00000104677	ENSGALG00000050504	1.41466				ENSGALT00000094347	ENSGALG00000051544	7.17736
												ENSGALT00000104681	ENSGALG00000048893	5.95979				ENSGALT00000094394	ENSGALG00000046948	5.2743
												ENSGALT00000104766	ENSGALG00000050628	4.8794				ENSGALT00000094518	ENSGALG00000048568	17.3251
												ENSGALT00000104804	ENSGALG00000048122	6.21476				ENSGALT00000094567	ENSGALG00000054188	10.5943
												ENSGALT00000104881	ENSGALG00000053109	1.72399				ENSGALT00000094603	ENSGALG00000048133	12.2818
												ENSGALT00000104890	ENSGALG00000052491	6.41048				ENSGALT00000094649	ENSGALG00000053291	6.79785
												ENSGALT00000104997	ENSGALG00000049528	10.3898				ENSGALT00000094682	ENSGALG00000052456	19.5294
												ENSGALT00000105238	ENSGALG00000054691	4.93392				ENSGALT00000094698	ENSGALG00000048544	14.4124
												ENSGALT00000105241	ENSGALG00000050357	1.66803				ENSGALT00000094771	ENSGALG00000051070	21.1052
												ENSGALT00000105705	ENSGALG00000049946	1.19205				ENSGALT00000094786	ENSGALG00000052145	16.5129
												ENSGALT00000105732	ENSGALG00000052179	2.90232				ENSGALT00000094796	ENSGALG00000048376	8
												ENSGALT00000105744	ENSGALG00000046523	1.40063				ENSGALT00000094807	ENSGALG00000049396	5.53314
												ENSGALT00000105748	ENSGALG00000049698	7.53871				ENSGALT00000094809	ENSGALG00000051425	5.30622
												ENSGALT00000105818	ENSGALG00000051423	1.5				ENSGALT00000094923	ENSGALG00000047870	11.8414
												ENSGALT00000105994	ENSGALG00000048644	5.63514				ENSGALT00000094951	ENSGALG00000053280	4.23008
												ENSGALT00000106373	ENSGALG00000043500	17.6246				ENSGALT00000094996	ENSGALG00000048640	7.8776
												ENSGALT00000106439	ENSGALG00000048750	2.36148				ENSGALT00000094998	ENSGALG00000053622	47.2413
												ENSGALT00000106466	ENSGALG00000053501	6.51757				ENSGALT00000095017	ENSGALG00000054461	15.872
												ENSGALT00000106593	ENSGALG00000055106	2.77559				ENSGALT00000095089	ENSGALG00000053289	93.9115
												ENSGALT00000106604	ENSGALG00000048341	5.68956				ENSGALT00000095109	ENSGALG00000048787	8.00444
												ENSGALT00000106731	ENSGALG00000047791	13.5059				ENSGALT00000095128	ENSGALG00000041830	11.7367
												ENSGALT00000106976	ENSGALG00000053435	1.63121				ENSGALT00000095136	ENSGALG00000048568	21.4709
												ENSGALT00000107165	ENSGALG00000048120	6.08301				ENSGALT00000095148	ENSGALG00000051126	5.90175
												ENSGALT00000107456	ENSGALG00000051388	5.35734				ENSGALT00000095165	ENSGALG00000048794	11.2423
												ENSGALT00000107928	ENSGALG00000049946	6.24331				ENSGALT00000095330	ENSGALG00000050561	7.34138
												ENSGALT00000108020	ENSGALG00000051157	2.89051				ENSGALT00000095407	ENSGALG00000049796	6.68558
												ENSGALT00000108041	ENSGALG00000046742	3.01471				ENSGALT00000095503	ENSGALG00000050765	7.14688
												ENSGALT00000108128	ENSGALG00000047729	1.21188				ENSGALT00000095506	ENSGALG00000053037	6.56058
												ENSGALT00000108258	ENSGALG00000049377	1.9184				ENSGALT00000095579	ENSGALG00000050457	6.82938
												ENSGALT00000108332	ENSGALG00000050346	1.25228				ENSGALT00000095599	ENSGALG00000049913	45.6613
												ENSGALT00000108361	ENSGALG00000051683	10.6457				ENSGALT00000095620	ENSGALG00000052102	10.816
																		ENSGALT00000095639	ENSGALG00000029613	6.05387
																		ENSGALT00000095677	ENSGALG00000047032	8.95499
																		ENSGALT00000095709	ENSGALG00000053269	20.9861
																		ENSGALT00000095711	ENSGALG00000054958	9.11111
																		ENSGALT00000095716	ENSGALG00000052385	7.53147
																		ENSGALT00000095718	ENSGALG00000053802	7.33531
																		ENSGALT00000095731	ENSGALG00000048619	6.62693
																		ENSGALT00000095766	ENSGALG00000048456	6.42447
																		ENSGALT00000095799	ENSGALG00000052237	20.3985
																		ENSGALT00000095861	ENSGALG00000051696	13.8469
																		ENSGALT00000095875	ENSGALG00000050812	9.67702
																		ENSGALT00000095887	ENSGALG00000054076	6.66165
																		ENSGALT00000095915	ENSGALG00000050702	1.70189
																		ENSGALT00000095931	ENSGALG00000049964	5.75585
																		ENSGALT00000095980	ENSGALG00000051893	8.23964
																		ENSGALT00000095983	ENSGALG00000053261	6.34978
																		ENSGALT00000095990	ENSGALG00000048248	33.1777
																		ENSGALT00000095999	ENSGALG00000053201	12.3644
																		ENSGALT00000096060	ENSGALG00000050034	5.11332
																		ENSGALT00000096063	ENSGALG00000049930	5.04543
																		ENSGALT00000096084	ENSGALG00000030129	36.1617
																		ENSGALT00000096088	ENSGALG00000051738	5.37149
																		ENSGALT00000096109	ENSGALG00000034000	6.97805
																		ENSGALT00000096110	ENSGALG00000049280	5.66787
																		ENSGALT00000096198	ENSGALG00000047598	10.5973
																		ENSGALT00000096207	ENSGALG00000054670	18.9848
																		ENSGALT00000096224	ENSGALG00000049447	11.1659
																		ENSGALT00000096262	ENSGALG00000047112	6.86208
																		ENSGALT00000096263	ENSGALG00000053177	5.92625
																		ENSGALT00000096403	ENSGALG00000046929	5.50437
																		ENSGALT00000096449	ENSGALG00000053512	6.67808
																		ENSGALT00000096542	ENSGALG00000047748	1.52669
																		ENSGALT00000096558	ENSGALG00000054039	21.3807
																		ENSGALT00000096561	ENSGALG00000047264	7.11482
																		ENSGALT00000096582	ENSGALG00000051878	9.03501
																		ENSGALT00000096593	ENSGALG00000053736	1.99829
																		ENSGALT00000096605	ENSGALG00000051211	5.69573
																		ENSGALT00000096634	ENSGALG00000053772	20.555
																		ENSGALT00000096674	ENSGALG00000046758	7.02771
																		ENSGALT00000096703	ENSGALG00000047045	13.0386
																		ENSGALT00000096710	ENSGALG00000050835	7.22976
																		ENSGALT00000096713	ENSGALG00000051637	1.20301
																		ENSGALT00000096744	ENSGALG00000050220	5.73759
																		ENSGALT00000096753	ENSGALG00000047229	6.80439
																		ENSGALT00000096802	ENSGALG00000048218	46.1045
																		ENSGALT00000096821	ENSGALG00000051648	5.65401
																		ENSGALT00000096827	ENSGALG00000054221	28.1628
																		ENSGALT00000096870	ENSGALG00000031799	6.20768
																		ENSGALT00000096912	ENSGALG00000047015	8.93659
																		ENSGALT00000096950	ENSGALG00000049565	2.71385
																		ENSGALT00000096963	ENSGALG00000052214	18.275
																		ENSGALT00000096974	ENSGALG00000054266	7.58968
																		ENSGALT00000096980	ENSGALG00000047045	80.1157
																		ENSGALT00000097031	ENSGALG00000049436	2.22634
																		ENSGALT00000097040	ENSGALG00000051756	5.56684
																		ENSGALT00000097100	ENSGALG00000049983	5.57834
																		ENSGALT00000097153	ENSGALG00000054975	8.5959
																		ENSGALT00000097161	ENSGALG00000053853	2.68996
																		ENSGALT00000097191	ENSGALG00000046839	5.30586
																		ENSGALT00000097206	ENSGALG00000050338	6.74413
																		ENSGALT00000097277	ENSGALG00000050297	7.56701
																		ENSGALT00000097352	ENSGALG00000051988	4.8325
																		ENSGALT00000097353	ENSGALG00000051309	6.51602
																		ENSGALT00000097358	ENSGALG00000046775	29.7446
																		ENSGALT00000097367	ENSGALG00000048661	5.05089
																		ENSGALT00000097456	ENSGALG00000049750	5.12985
																		ENSGALT00000097464	ENSGALG00000052667	7.19206
																		ENSGALT00000097528	ENSGALG00000046760	25.7596
																		ENSGALT00000097565	ENSGALG00000052691	6.41077
																		ENSGALT00000097566	ENSGALG00000049296	1.53571
																		ENSGALT00000097575	ENSGALG00000050231	16.1662
																		ENSGALT00000097576	ENSGALG00000048348	22.0337
																		ENSGALT00000097592	ENSGALG00000049831	6.0469
																		ENSGALT00000097635	ENSGALG00000053576	7.87985
																		ENSGALT00000097656	ENSGALG00000053463	6.44396
																		ENSGALT00000097657	ENSGALG00000051932	6.12048
																		ENSGALT00000097663	ENSGALG00000052394	79.2379
																		ENSGALT00000097665	ENSGALG00000049570	19.0165
																		ENSGALT00000097715	ENSGALG00000048134	8.64631
																		ENSGALT00000097728	ENSGALG00000054855	7.65787
																		ENSGALT00000097772	ENSGALG00000049824	6.74237
																		ENSGALT00000097800	ENSGALG00000052316	23.8375
																		ENSGALT00000097857	ENSGALG00000050562	11.0975
																		ENSGALT00000097867	ENSGALG00000048823	10.8332
																		ENSGALT00000097959	ENSGALG00000050839	17.3708
																		ENSGALT00000097982	ENSGALG00000047457	5.55781
																		ENSGALT00000098023	ENSGALG00000052428	31.5219
																		ENSGALT00000098068	ENSGALG00000047823	8.22323
																		ENSGALT00000098165	ENSGALG00000049081	23.521
																		ENSGALT00000098218	ENSGALG00000052870	12.241
																		ENSGALT00000098228	ENSGALG00000054792	38.3563
																		ENSGALT00000098278	ENSGALG00000053723	1.16441
																		ENSGALT00000098298	ENSGALG00000049803	20.4602
																		ENSGALT00000098309	ENSGALG00000052080	15.3531
																		ENSGALT00000098365	ENSGALG00000048975	15.1073
																		ENSGALT00000098398	ENSGALG00000054807	41.3245
																		ENSGALT00000098401	ENSGALG00000047278	7.56564
																		ENSGALT00000098418	ENSGALG00000053082	8.85369
																		ENSGALT00000098440	ENSGALG00000052570	5.76227
																		ENSGALT00000098577	ENSGALG00000052100	12.4351
																		ENSGALT00000098578	ENSGALG00000047844	10.6722
																		ENSGALT00000098589	ENSGALG00000051952	6.63266
																		ENSGALT00000098590	ENSGALG00000051585	5.73171
																		ENSGALT00000098617	ENSGALG00000047278	1.38627
																		ENSGALT00000098726	ENSGALG00000047306	5.63858
																		ENSGALT00000098733	ENSGALG00000052410	8.08027
																		ENSGALT00000098804	ENSGALG00000053410	14.7905
																		ENSGALT00000098863	ENSGALG00000049655	10.8096
																		ENSGALT00000098888	ENSGALG00000047944	5.02992
																		ENSGALT00000098947	ENSGALG00000054199	23.037
																		ENSGALT00000098985	ENSGALG00000053039	43.9311
																		ENSGALT00000098990	ENSGALG00000050378	9.48383
																		ENSGALT00000099002	ENSGALG00000054343	129.583
																		ENSGALT00000099043	ENSGALG00000051599	26.7712
																		ENSGALT00000099050	ENSGALG00000049706	13.5886
																		ENSGALT00000099075	ENSGALG00000049245	5.17448
																		ENSGALT00000099137	ENSGALG00000053679	5.77737
																		ENSGALT00000099171	ENSGALG00000048026	37.7458
																		ENSGALT00000099238	ENSGALG00000054845	15.404
																		ENSGALT00000099366	ENSGALG00000053416	8.8926
																		ENSGALT00000099406	ENSGALG00000050802	82.8184
																		ENSGALT00000099418	ENSGALG00000048121	5.4997
																		ENSGALT00000099421	ENSGALG00000046762	8.50917
																		ENSGALT00000099579	ENSGALG00000046991	38.9793
																		ENSGALT00000099700	ENSGALG00000052578	14.0278
																		ENSGALT00000099711	ENSGALG00000048800	71.2427
																		ENSGALT00000099839	ENSGALG00000048576	15.2629
																		ENSGALT00000099842	ENSGALG00000055076	7.72555
																		ENSGALT00000099931	ENSGALG00000052921	6.12165
																		ENSGALT00000100064	ENSGALG00000054383	4.9964
																		ENSGALT00000100078	ENSGALG00000050778	6.35564
																		ENSGALT00000100083	ENSGALG00000048173	10.9628
																		ENSGALT00000100103	ENSGALG00000047365	6.7728
																		ENSGALT00000100151	ENSGALG00000049011	5.26114
																		ENSGALT00000100226	ENSGALG00000047080	9.81962
																		ENSGALT00000100255	ENSGALG00000051366	13.2547
																		ENSGALT00000100267	ENSGALG00000053796	14.6976
																		ENSGALT00000100283	ENSGALG00000051425	5.40642
																		ENSGALT00000100329	ENSGALG00000050790	11.8054
																		ENSGALT00000100346	ENSGALG00000048615	9.90832
																		ENSGALT00000100351	ENSGALG00000050108	12.0464
																		ENSGALT00000100376	ENSGALG00000048195	18.6886
																		ENSGALT00000100382	ENSGALG00000048398	5.80988
																		ENSGALT00000100451	ENSGALG00000048075	23.1813
																		ENSGALT00000100500	ENSGALG00000050923	6.38986
																		ENSGALT00000100507	ENSGALG00000055011	5.97087
																		ENSGALT00000100534	ENSGALG00000053666	40.9976
																		ENSGALT00000100572	ENSGALG00000051464	6.91106
																		ENSGALT00000100600	ENSGALG00000049470	7.46795
																		ENSGALT00000100605	ENSGALG00000046679	6.11212
																		ENSGALT00000100607	ENSGALG00000052792	9.07215
																		ENSGALT00000100692	ENSGALG00000053223	5.3952
																		ENSGALT00000100698	ENSGALG00000054477	5.71924
																		ENSGALT00000100700	ENSGALG00000046832	13.3306
																		ENSGALT00000100723	ENSGALG00000050290	27.0502
																		ENSGALT00000100784	ENSGALG00000052272	33.4629
																		ENSGALT00000100798	ENSGALG00000052344	41.0574
																		ENSGALT00000100872	ENSGALG00000047047	5.41731
																		ENSGALT00000100912	ENSGALG00000052916	5.79566
																		ENSGALT00000100943	ENSGALG00000048831	33.1517
																		ENSGALT00000100971	ENSGALG00000054603	5.14812
																		ENSGALT00000100994	ENSGALG00000047984	13.5267
																		ENSGALT00000101022	ENSGALG00000052717	6.1595
																		ENSGALT00000101038	ENSGALG00000048726	21.6441
																		ENSGALT00000101071	ENSGALG00000047398	12.0068
																		ENSGALT00000101084	ENSGALG00000052370	8.27673
																		ENSGALT00000101114	ENSGALG00000050146	19.574
																		ENSGALT00000101165	ENSGALG00000051524	1.43475
																		ENSGALT00000101175	ENSGALG00000050945	6.99922
																		ENSGALT00000101192	ENSGALG00000048357	49.3625
																		ENSGALT00000101219	ENSGALG00000050716	48.072
																		ENSGALT00000101287	ENSGALG00000050273	5.28636
																		ENSGALT00000101303	ENSGALG00000054672	18.81
																		ENSGALT00000101313	ENSGALG00000054880	41.4164
																		ENSGALT00000101352	ENSGALG00000050061	5.7924
																		ENSGALT00000101353	ENSGALG00000049674	8.27616
																		ENSGALT00000101363	ENSGALG00000046890	1.69439
																		ENSGALT00000101495	ENSGALG00000050449	8.64797
																		ENSGALT00000101537	ENSGALG00000048995	9.46373
																		ENSGALT00000101558	ENSGALG00000049468	17.4203
																		ENSGALT00000101617	ENSGALG00000050361	5.0815
																		ENSGALT00000101623	ENSGALG00000051418	8.58218
																		ENSGALT00000101630	ENSGALG00000051452	46.7909
																		ENSGALT00000101696	ENSGALG00000048609	6.01988
																		ENSGALT00000101700	ENSGALG00000049375	18.7193
																		ENSGALT00000101753	ENSGALG00000047962	5.969
																		ENSGALT00000101812	ENSGALG00000052721	6.74126
																		ENSGALT00000101817	ENSGALG00000051605	1.93594
																		ENSGALT00000101894	ENSGALG00000052711	8.22269
																		ENSGALT00000101936	ENSGALG00000051294	5.48006
																		ENSGALT00000101964	ENSGALG00000054386	7.15473
																		ENSGALT00000101968	ENSGALG00000051411	7.6217
																		ENSGALT00000101980	ENSGALG00000051048	8.26679
																		ENSGALT00000102017	ENSGALG00000047093	11.0937
																		ENSGALT00000102025	ENSGALG00000047303	5.49296
																		ENSGALT00000102052	ENSGALG00000049297	6.94696
																		ENSGALT00000102074	ENSGALG00000054147	5.65568
																		ENSGALT00000102123	ENSGALG00000052393	6.29325
																		ENSGALT00000102202	ENSGALG00000051788	8.50301
																		ENSGALT00000102221	ENSGALG00000047893	5.51835
																		ENSGALT00000102257	ENSGALG00000049666	4.39436
																		ENSGALT00000102302	ENSGALG00000047076	6.80798
																		ENSGALT00000102403	ENSGALG00000053739	5.99385
																		ENSGALT00000102454	ENSGALG00000047123	5.26931
																		ENSGALT00000102460	ENSGALG00000053263	15.6188
																		ENSGALT00000102546	ENSGALG00000051151	102.097
																		ENSGALT00000102555	ENSGALG00000053447	3.56893
																		ENSGALT00000102564	ENSGALG00000054825	5.68764
																		ENSGALT00000102568	ENSGALG00000046709	15.8358
																		ENSGALT00000102595	ENSGALG00000052099	11.0505
																		ENSGALT00000102715	ENSGALG00000047065	6.1895
																		ENSGALT00000102720	ENSGALG00000054704	12.2477
																		ENSGALT00000102733	ENSGALG00000048393	5.14448
																		ENSGALT00000102734	ENSGALG00000053293	23.2395
																		ENSGALT00000102778	ENSGALG00000051233	37.0312
																		ENSGALT00000102792	ENSGALG00000054654	18.1762
																		ENSGALT00000102856	ENSGALG00000050137	8.32351
																		ENSGALT00000102866	ENSGALG00000054932	27.1686
																		ENSGALT00000102868	ENSGALG00000049436	9.51982
																		ENSGALT00000102887	ENSGALG00000048643	19.951
																		ENSGALT00000103019	ENSGALG00000047962	31.7458
																		ENSGALT00000103139	ENSGALG00000052131	5.53786
																		ENSGALT00000103180	ENSGALG00000054485	24.4597
																		ENSGALT00000103205	ENSGALG00000051507	14.2671
																		ENSGALT00000103219	ENSGALG00000046799	5.48305
																		ENSGALT00000103273	ENSGALG00000052966	7.35933
																		ENSGALT00000103286	ENSGALG00000047690	18.768
																		ENSGALT00000103296	ENSGALG00000047896	45.9516
																		ENSGALT00000103314	ENSGALG00000054986	84.5024
																		ENSGALT00000103343	ENSGALG00000048197	14.2791
																		ENSGALT00000103363	ENSGALG00000055015	10.6859
																		ENSGALT00000103378	ENSGALG00000050572	81.5929
																		ENSGALT00000103396	ENSGALG00000051053	32.0056
																		ENSGALT00000103397	ENSGALG00000049523	5.9895
																		ENSGALT00000103448	ENSGALG00000046679	12.558
																		ENSGALT00000103450	ENSGALG00000049806	5.4648
																		ENSGALT00000103482	ENSGALG00000049407	8.30332
																		ENSGALT00000103584	ENSGALG00000047115	31.9856
																		ENSGALT00000103621	ENSGALG00000052386	5.44908
																		ENSGALT00000103651	ENSGALG00000049572	6.32287
																		ENSGALT00000103664	ENSGALG00000049924	39.4794
																		ENSGALT00000103680	ENSGALG00000050625	6.177
																		ENSGALT00000103706	ENSGALG00000055005	9.89013
																		ENSGALT00000103752	ENSGALG00000049452	9.85221
																		ENSGALT00000103769	ENSGALG00000050391	5.51977
																		ENSGALT00000103773	ENSGALG00000052325	11.6627
																		ENSGALT00000103775	ENSGALG00000053896	4.97393
																		ENSGALT00000103785	ENSGALG00000054807	38.7638
																		ENSGALT00000103792	ENSGALG00000051878	5.25688
																		ENSGALT00000103793	ENSGALG00000048512	8.45582
																		ENSGALT00000103835	ENSGALG00000050584	14.2991
																		ENSGALT00000103883	ENSGALG00000047451	74.3054
																		ENSGALT00000103903	ENSGALG00000050987	9.10593
																		ENSGALT00000103944	ENSGALG00000054751	6.83972
																		ENSGALT00000103945	ENSGALG00000053009	9.57143
																		ENSGALT00000104001	ENSGALG00000049424	185.301
																		ENSGALT00000104021	ENSGALG00000049674	10.3966
																		ENSGALT00000104024	ENSGALG00000047774	5.60217
																		ENSGALT00000104046	ENSGALG00000051819	20.6307
																		ENSGALT00000104057	ENSGALG00000047400	23.0266
																		ENSGALT00000104067	ENSGALG00000053941	9.57617
																		ENSGALT00000104091	ENSGALG00000047373	7.81078
																		ENSGALT00000104105	ENSGALG00000054993	6.6673
																		ENSGALT00000104164	ENSGALG00000047156	17.0674
																		ENSGALT00000104177	ENSGALG00000047572	14.8442
																		ENSGALT00000104245	ENSGALG00000049792	7.39185
																		ENSGALT00000104255	ENSGALG00000052370	60.6916
																		ENSGALT00000104264	ENSGALG00000047444	6.52375
																		ENSGALT00000104292	ENSGALG00000036780	7.39937
																		ENSGALT00000104297	ENSGALG00000049919	11.9081
																		ENSGALT00000104362	ENSGALG00000048793	7.48397
																		ENSGALT00000104383	ENSGALG00000054046	8.7327
																		ENSGALT00000104449	ENSGALG00000052456	9.9865
																		ENSGALT00000104475	ENSGALG00000051791	46.496
																		ENSGALT00000104520	ENSGALG00000053845	32.3035
																		ENSGALT00000104558	ENSGALG00000052394	13.1596
																		ENSGALT00000104607	ENSGALG00000047923	8.65894
																		ENSGALT00000104623	ENSGALG00000053330	5.26993
																		ENSGALT00000104643	ENSGALG00000052416	35.7462
																		ENSGALT00000104663	ENSGALG00000054764	3.28975
																		ENSGALT00000104668	ENSGALG00000046815	6.32542
																		ENSGALT00000104697	ENSGALG00000054901	27.5968
																		ENSGALT00000104704	ENSGALG00000051416	5.48115
																		ENSGALT00000104717	ENSGALG00000049330	7.01046
																		ENSGALT00000104732	ENSGALG00000041838	12.156
																		ENSGALT00000104763	ENSGALG00000049729	7.14493
																		ENSGALT00000104810	ENSGALG00000049552	5.27071
																		ENSGALT00000104826	ENSGALG00000050168	13.198
																		ENSGALT00000104891	ENSGALG00000051296	10.6273
																		ENSGALT00000104920	ENSGALG00000054581	24.1919
																		ENSGALT00000104983	ENSGALG00000053858	42.3273
																		ENSGALT00000105017	ENSGALG00000053027	11.101
																		ENSGALT00000105097	ENSGALG00000053386	6.46845
																		ENSGALT00000105117	ENSGALG00000050704	29.9176
																		ENSGALT00000105155	ENSGALG00000054194	16.059
																		ENSGALT00000105184	ENSGALG00000049967	11.298
																		ENSGALT00000105197	ENSGALG00000051741	15.0748
																		ENSGALT00000105226	ENSGALG00000054268	21.6276
																		ENSGALT00000105259	ENSGALG00000030930	5.70581
																		ENSGALT00000105290	ENSGALG00000051558	8.18849
																		ENSGALT00000105294	ENSGALG00000049143	10.2483
																		ENSGALT00000105409	ENSGALG00000048988	51.9962
																		ENSGALT00000105421	ENSGALG00000047123	5.90019
																		ENSGALT00000105441	ENSGALG00000051486	5.87814
																		ENSGALT00000105443	ENSGALG00000049757	5.47903
																		ENSGALT00000105492	ENSGALG00000048875	14.8838
																		ENSGALT00000105522	ENSGALG00000046736	7.33036
																		ENSGALT00000105525	ENSGALG00000052477	16.1797
																		ENSGALT00000105555	ENSGALG00000051425	8.85957
																		ENSGALT00000105573	ENSGALG00000055116	44.8068
																		ENSGALT00000105637	ENSGALG00000050480	8.84296
																		ENSGALT00000105642	ENSGALG00000049177	7.68533
																		ENSGALT00000105646	ENSGALG00000054906	5.5801
																		ENSGALT00000105676	ENSGALG00000052277	5.62475
																		ENSGALT00000105689	ENSGALG00000046682	10.6469
																		ENSGALT00000105694	ENSGALG00000048316	6.38532
																		ENSGALT00000105697	ENSGALG00000048088	9.71593
																		ENSGALT00000105706	ENSGALG00000046711	5.29844
																		ENSGALT00000105707	ENSGALG00000047089	20.3662
																		ENSGALT00000105771	ENSGALG00000035389	5.51735
																		ENSGALT00000105790	ENSGALG00000048927	10.41
																		ENSGALT00000105793	ENSGALG00000052751	6.54161
																		ENSGALT00000105807	ENSGALG00000053744	22.9012
																		ENSGALT00000105847	ENSGALG00000052232	17.9718
																		ENSGALT00000105849	ENSGALG00000050434	6.38638
																		ENSGALT00000105859	ENSGALG00000049694	177.263
																		ENSGALT00000105877	ENSGALG00000046775	7.87293
																		ENSGALT00000105891	ENSGALG00000051309	56.9216
																		ENSGALT00000105935	ENSGALG00000049888	8.3632
																		ENSGALT00000105961	ENSGALG00000046880	5.59677
																		ENSGALT00000105990	ENSGALG00000053390	49.3384
																		ENSGALT00000106097	ENSGALG00000046935	7.47033
																		ENSGALT00000106186	ENSGALG00000049081	8.88646
																		ENSGALT00000106313	ENSGALG00000049918	6.2183
																		ENSGALT00000106323	ENSGALG00000049530	6.61517
																		ENSGALT00000106356	ENSGALG00000054229	6.96522
																		ENSGALT00000106396	ENSGALG00000034116	12.778
																		ENSGALT00000106416	ENSGALG00000047803	5.22125
																		ENSGALT00000106418	ENSGALG00000052133	9.507
																		ENSGALT00000106487	ENSGALG00000050106	5.60311
																		ENSGALT00000106639	ENSGALG00000051448	5.13591
																		ENSGALT00000106734	ENSGALG00000050193	6.70277
																		ENSGALT00000106762	ENSGALG00000054672	19.3038
																		ENSGALT00000106769	ENSGALG00000052483	39.2559
																		ENSGALT00000106849	ENSGALG00000047274	7.31729
																		ENSGALT00000106961	ENSGALG00000036514	22.5843
																		ENSGALT00000106974	ENSGALG00000052127	6.8471
																		ENSGALT00000107079	ENSGALG00000053941	36.0673
																		ENSGALT00000107127	ENSGALG00000052987	7.44946
																		ENSGALT00000107135	ENSGALG00000052507	5.50622
																		ENSGALT00000107199	ENSGALG00000047806	5.92765
																		ENSGALT00000107240	ENSGALG00000051070	9.58754
																		ENSGALT00000107290	ENSGALG00000053782	10.0133
																		ENSGALT00000107336	ENSGALG00000049661	21.4005
																		ENSGALT00000107337	ENSGALG00000046774	53.365
																		ENSGALT00000107358	ENSGALG00000051264	22.6431
																		ENSGALT00000107392	ENSGALG00000052372	8.12888
																		ENSGALT00000107448	ENSGALG00000054662	9.22012
																		ENSGALT00000107474	ENSGALG00000035579	7.37564
																		ENSGALT00000107516	ENSGALG00000049286	8.665
																		ENSGALT00000107520	ENSGALG00000052594	9.04416
																		ENSGALT00000107592	ENSGALG00000047608	6.24272
																		ENSGALT00000107712	ENSGALG00000054507	9.73095
																		ENSGALT00000107719	ENSGALG00000051103	6.37582
																		ENSGALT00000107757	ENSGALG00000050430	15.1177
																		ENSGALT00000107784	ENSGALG00000049661	19.9137
																		ENSGALT00000107814	ENSGALG00000048681	9.4309
																		ENSGALT00000107830	ENSGALG00000052424	5.34419
																		ENSGALT00000107843	ENSGALG00000051671	11.1599
																		ENSGALT00000107847	ENSGALG00000053118	12.3835
																		ENSGALT00000107860	ENSGALG00000051802	8.32577
																		ENSGALT00000107889	ENSGALG00000054279	9.00704
																		ENSGALT00000107897	ENSGALG00000054031	5.55926
																		ENSGALT00000107970	ENSGALG00000051472	16.1553
																		ENSGALT00000108063	ENSGALG00000051366	11.203
																		ENSGALT00000108070	ENSGALG00000050099	18.9662
																		ENSGALT00000108127	ENSGALG00000051527	7.05747
																		ENSGALT00000108133	ENSGALG00000054427	7.69725
																		ENSGALT00000108152	ENSGALG00000054932	42.6777
																		ENSGALT00000108179	ENSGALG00000050911	8.35795
																		ENSGALT00000108196	ENSGALG00000048017	35.144
																		ENSGALT00000108211	ENSGALG00000047881	16.8755
																		ENSGALT00000108218	ENSGALG00000048260	6.21117
																		ENSGALT00000108261	ENSGALG00000054855	5.14987
																		ENSGALT00000108266	ENSGALG00000054641	6.35483
																		ENSGALT00000108293	ENSGALG00000052830	15.9791
																		ENSGALT00000108351	ENSGALG00000054544	14.0947
																		ENSGALT00000108358	ENSGALG00000050469	9.81234

## Sheet: Extended lncRNA Analysis Transc
Supplemental Table 2: Cell Type Specific Transcripts and lncRNAs
Sheet 3: Extended lncRNA Analysis Transcripts
Cell Type	Gene ID	Transcript ID	Specific to Cell Type
B Cell	ENSGALG00000052679	ENSGALT00000095864	NO
B Cell	107054287	XR_001469189	NO
B Cell	ENSGALG00000049873	ENSGALT00000094030	NO
B Cell	ENSGALG00000049873	ENSGALT00000101432	NO
B Cell	ENSGALG00000047599	ENSGALT00000104441	NO
B Cell	ENSGALG00000048328	ENSGALT00000098229	NO
B Cell	ENSGALG00000051962	ENSGALT00000106663	NO
B Cell	ENSGALG00000053590	ENSGALT00000103156	NO
B Cell	ENSGALG00000051854	ENSGALT00000099875	NO
B Cell	ENSGALG00000051854	ENSGALT00000098227	NO
B Cell	ENSGALG00000008153	ENSGALT00000013244	NO
B Cell	ENSGALG00000053060	ENSGALT00000097398	NO
B Cell	ENSGALG00000050475	ENSGALT00000105830	NO
B Cell	107054553	XR_001468950	NO
B Cell	ENSGALG00000046927	ENSGALT00000103533	NO
B Cell	ENSGALG00000046927	ENSGALT00000091103	NO
B Cell	ENSGALG00000051968	ENSGALT00000099851	NO
B Cell	ENSGALG00000054077	ENSGALT00000093990	NO
B Cell	ENSGALG00000038546	ENSGALT00000070713	NO
B Cell	ENSGALG00000034533	ENSGALT00000052303	NO
B Cell	ENSGALG00000034533	ENSGALT00000066961	NO
B Cell	ENSGALG00000054277	ENSGALT00000101562	NO
B Cell	ENSGALG00000038806	ENSGALT00000082360	NO
B Cell	ENSGALG00000054568	ENSGALT00000094312	NO
B Cell	107052702	XR_001465363	YES
B Cell	ENSGALG00000051395	ENSGALT00000100843	NO
B Cell	ENSGALG00000050641	ENSGALT00000100363	NO
B Cell	ENSGALG00000052261	ENSGALT00000090782	NO
B Cell	ENSGALG00000048220	ENSGALT00000100787	NO
B Cell	ENSGALG00000054813	ENSGALT00000093133	NO
B Cell	ENSGALG00000048220	ENSGALT00000092083	NO
B Cell	ENSGALG00000052884	ENSGALT00000104875	NO
B Cell	ENSGALG00000054172	ENSGALT00000095808	NO
B Cell	ENSGALG00000048831	ENSGALT00000100943	NO
B Cell	ENSGALG00000048831	ENSGALT00000091449	NO
B Cell	ENSGALG00000037666	ENSGALT00000052214	NO
B Cell	ENSGALG00000052912	ENSGALT00000091649	NO
B Cell	ENSGALG00000049545	ENSGALT00000097884	NO
B Cell	ENSGALG00000049545	ENSGALT00000099651	NO
B Cell	107053731	XR_001467267	NO
B Cell	107053687	XR_001467190	NO
B Cell	ENSGALG00000038966	ENSGALT00000101085	YES
B Cell	ENSGALG00000038966	ENSGALT00000073738	NO
B Cell	ENSGALG00000053066	ENSGALT00000098146	NO
B Cell	ENSGALG00000050393	ENSGALT00000105699	NO
B Cell	ENSGALG00000048001	ENSGALT00000090854	NO
B Cell	ENSGALG00000054159	ENSGALT00000098119	NO
B Cell	ENSGALG00000036958	ENSGALT00000073142	NO
B Cell	ENSGALG00000036958	ENSGALT00000049088	NO
B Cell	ENSGALG00000052544	ENSGALT00000093457	NO
B Cell	ENSGALG00000048948	ENSGALT00000090771	NO
B Cell	ENSGALG00000048948	ENSGALT00000101433	NO
B Cell	ENSGALG00000029704	ENSGALT00000078384	NO
B Cell	107053437	XR_001466653	NO
B Cell	ENSGALG00000053936	ENSGALT00000094657	NO
B Cell	ENSGALG00000048674	ENSGALT00000092535	NO
B Cell	ENSGALG00000048674	ENSGALT00000105857	NO
B Cell	ENSGALG00000052327	ENSGALT00000095220	NO
B Cell	ENSGALG00000049795	ENSGALT00000096818	NO
B Cell	ENSGALG00000052032	ENSGALT00000101648	NO
B Cell	ENSGALG00000048615	ENSGALT00000100702	NO
B Cell	ENSGALG00000047725	ENSGALT00000096578	NO
B Cell	107054070	XR_001468002	NO
B Cell	ENSGALG00000048230	ENSGALT00000104591	NO
B Cell	ENSGALG00000048230	ENSGALT00000091552	NO
B Cell	107055509	XR_001470566	YES
B Cell	101748309	XR_001468569	NO
B Cell	ENSGALG00000049912	ENSGALT00000092442	NO
B Cell	ENSGALG00000052801	ENSGALT00000094338	NO
B Cell	ENSGALG00000052006	ENSGALT00000105270	NO
B Cell	ENSGALG00000049696	ENSGALT00000104233	NO
B Cell	ENSGALG00000053172	ENSGALT00000096999	NO
B Cell	107054682	XR_001469193	NO
B Cell	ENSGALG00000031177	ENSGALT00000052004	NO
B Cell	107054904	XR_001469735	NO
B Cell	ENSGALG00000051786	ENSGALT00000103824	NO
B Cell	ENSGALG00000051786	ENSGALT00000093078	NO
B Cell	ENSGALG00000054540	ENSGALT00000099584	YES
B Cell	ENSGALG00000049574	ENSGALT00000107800	NO
B Cell	ENSGALG00000049574	ENSGALT00000091098	NO
B Cell	ENSGALG00000055040	ENSGALT00000097247	NO
B Cell	ENSGALG00000051316	ENSGALT00000094422	NO
B Cell	ENSGALG00000051316	ENSGALT00000096168	YES
B Cell	ENSGALG00000051316	ENSGALT00000096874	YES
B Cell	ENSGALG00000053808	ENSGALT00000107622	NO
B Cell	ENSGALG00000049467	ENSGALT00000100328	NO
B Cell	ENSGALG00000047247	ENSGALT00000100760	NO
B Cell	ENSGALG00000047787	ENSGALT00000091532	NO
B Cell	ENSGALG00000048889	ENSGALT00000094903	NO
B Cell	ENSGALG00000054333	ENSGALT00000099201	NO
B Cell	ENSGALG00000049249	ENSGALT00000092523	NO
B Cell	ENSGALG00000049841	ENSGALT00000107676	NO
B Cell	ENSGALG00000049841	ENSGALT00000104867	YES
B Cell	ENSGALG00000051887	ENSGALT00000095928	NO
B Cell	ENSGALG00000050699	ENSGALT00000100968	NO
B Cell	ENSGALG00000047851	ENSGALT00000099732	NO
B Cell	ENSGALG00000047851	ENSGALT00000093329	NO
B Cell	ENSGALG00000034279	ENSGALT00000047459	NO
B Cell	ENSGALG00000032359	ENSGALT00000056725	NO
B Cell	ENSGALG00000033758	ENSGALT00000074948	NO
B Cell	ENSGALG00000050849	ENSGALT00000096338	NO
B Cell	ENSGALG00000049070	ENSGALT00000092365	NO
B Cell	ENSGALG00000047734	ENSGALT00000102352	NO
B Cell	107050027	XR_001462341	NO
B Cell	ENSGALG00000050327	ENSGALT00000092630	NO
B Cell	ENSGALG00000049423	ENSGALT00000098938	YES
B Cell	ENSGALG00000049965	ENSGALT00000100228	NO
B Cell	ENSGALG00000049965	ENSGALT00000096217	NO
B Cell	ENSGALG00000049680	ENSGALT00000096378	NO
B Cell	ENSGALG00000052501	ENSGALT00000107890	NO
B Cell	ENSGALG00000051908	ENSGALT00000099286	NO
B Cell	ENSGALG00000048953	ENSGALT00000106488	NO
B Cell	ENSGALG00000047958	ENSGALT00000094488	NO
B Cell	107051979	XR_001464004	NO
B Cell	ENSGALG00000054405	ENSGALT00000098509	NO
B Cell	ENSGALG00000053462	ENSGALT00000093647	YES
B Cell	ENSGALG00000050038	ENSGALT00000104250	NO
B Cell	ENSGALG00000048763	ENSGALT00000101259	NO
B Cell	ENSGALG00000050273	ENSGALT00000090474	NO
B Cell	ENSGALG00000052226	ENSGALT00000093265	NO
B Cell	ENSGALG00000050514	ENSGALT00000108260	NO
B Cell	ENSGALG00000053256	ENSGALT00000096573	NO
B Cell	ENSGALG00000053592	ENSGALT00000104547	NO
B Cell	ENSGALG00000050971	ENSGALT00000098432	NO
B Cell	ENSGALG00000051838	ENSGALT00000096571	NO
B Cell	ENSGALG00000053206	ENSGALT00000105942	NO
B Cell	ENSGALG00000050423	ENSGALT00000101684	NO
B Cell	ENSGALG00000047778	ENSGALT00000091743	NO
B Cell	ENSGALG00000050093	ENSGALT00000094360	NO
B Cell	ENSGALG00000047087	ENSGALT00000108316	NO
B Cell	ENSGALG00000002102	ENSGALT00000003281	NO
B Cell	ENSGALG00000002102	ENSGALT00000106683	NO
B Cell	107052155	XR_001464384	NO
B Cell	101747496	XR_212835	NO
B Cell	107052133	XR_001464355	NO
B Cell	107052132	XR_001464354	NO
B Cell	ENSGALG00000034549	ENSGALT00000104818	NO
B Cell	ENSGALG00000046784	ENSGALT00000095825	NO
B Cell	107054193	XR_001468217	NO
B Cell	ENSGALG00000034021	ENSGALT00000099955	NO
B Cell	ENSGALG00000034021	ENSGALT00000091307	NO
B Cell	ENSGALG00000034021	ENSGALT00000056082	NO
B Cell	ENSGALG00000050543	ENSGALT00000101620	NO
B Cell	ENSGALG00000029565	ENSGALT00000051741	NO
B Cell	ENSGALG00000029565	ENSGALT00000047445	NO
B Cell	ENSGALG00000046938	ENSGALT00000107027	NO
B Cell	ENSGALG00000046938	ENSGALT00000106933	NO
B Cell	ENSGALG00000053016	ENSGALT00000096865	NO
B Cell	ENSGALG00000049524	ENSGALT00000090554	NO
B Cell	ENSGALG00000049524	ENSGALT00000105502	NO
B Cell	ENSGALG00000049524	ENSGALT00000097001	NO
B Cell	ENSGALG00000054517	ENSGALT00000105874	NO
B Cell	ENSGALG00000050101	ENSGALT00000102736	NO
B Cell	ENSGALG00000050933	ENSGALT00000100307	NO
B Cell	ENSGALG00000048094	ENSGALT00000102842	NO
B Cell	107054238	XR_001468306	NO
B Cell	ENSGALG00000047399	ENSGALT00000103798	NO
B Cell	ENSGALG00000047399	ENSGALT00000090808	NO
B Cell	ENSGALG00000047206	ENSGALT00000092963	NO
B Cell	ENSGALG00000047817	ENSGALT00000097311	NO
B Cell	ENSGALG00000042165	ENSGALT00000106411	NO
B Cell	ENSGALG00000042165	ENSGALT00000074449	YES
B Cell	ENSGALG00000053092	ENSGALT00000102331	NO
B Cell	ENSGALG00000029858	ENSGALT00000064818	NO
B Cell	ENSGALG00000053471	ENSGALT00000093034	NO
B Cell	ENSGALG00000053471	ENSGALT00000105989	NO
B Cell	ENSGALG00000052008	ENSGALT00000092066	NO
B Cell	107054284	XR_001468414	NO
B Cell	ENSGALG00000047292	ENSGALT00000106238	NO
B Cell	ENSGALG00000029853	ENSGALT00000064935	NO
B Cell	ENSGALG00000051775	ENSGALT00000092912	NO
B Cell	ENSGALG00000051321	ENSGALT00000094046	NO
B Cell	ENSGALG00000048881	ENSGALT00000104569	YES
B Cell	ENSGALG00000052642	ENSGALT00000107846	NO
B Cell	ENSGALG00000047907	ENSGALT00000098389	NO
B Cell	ENSGALG00000046802	ENSGALT00000102149	NO
B Cell	ENSGALG00000048780	ENSGALT00000097260	NO
B Cell	ENSGALG00000050353	ENSGALT00000101771	NO
B Cell	ENSGALG00000046005	ENSGALT00000089280	NO
B Cell	ENSGALG00000048708	ENSGALT00000100482	NO
B Cell	ENSGALG00000051069	ENSGALT00000104180	NO
B Cell	ENSGALG00000052896	ENSGALT00000095831	NO
B Cell	ENSGALG00000051491	ENSGALT00000093454	NO
B Cell	ENSGALG00000051491	ENSGALT00000099519	NO
B Cell	ENSGALG00000029396	ENSGALT00000052482	NO
B Cell	ENSGALG00000029396	ENSGALT00000099011	NO
B Cell	ENSGALG00000029680	ENSGALT00000103166	NO
B Cell	ENSGALG00000029680	ENSGALT00000064093	NO
B Cell	ENSGALG00000048408	ENSGALT00000103911	NO
B Cell	ENSGALG00000051867	ENSGALT00000092328	NO
B Cell	ENSGALG00000051433	ENSGALT00000093844	NO
B Cell	ENSGALG00000051433	ENSGALT00000102363	NO
B Cell	107054423	XR_001468674	NO
B Cell	ENSGALG00000041405	ENSGALT00000062284	NO
B Cell	ENSGALG00000054011	ENSGALT00000094915	NO
B Cell	107054396	XR_001468602	NO
B Cell	ENSGALG00000052610	ENSGALT00000090700	NO
B Cell	ENSGALG00000049166	ENSGALT00000095020	NO
B Cell	ENSGALG00000053606	ENSGALT00000091284	NO
B Cell	ENSGALG00000054890	ENSGALT00000096004	NO
B Cell	ENSGALG00000049111	ENSGALT00000094306	NO
B Cell	ENSGALG00000042782	ENSGALT00000072561	NO
B Cell	101749196	XR_001468777	NO
B Cell	ENSGALG00000052377	ENSGALT00000091000	NO
B Cell	107054510	XR_001468837	NO
B Cell	ENSGALG00000033332	ENSGALT00000064624	NO
B Cell	ENSGALG00000051396	ENSGALT00000093866	NO
B Cell	107054534	XR_001468886	NO
B Cell	ENSGALG00000034305	ENSGALT00000095094	NO
B Cell	ENSGALG00000034305	ENSGALT00000071020	YES
B Cell	ENSGALG00000049999	ENSGALT00000097492	YES
B Cell	ENSGALG00000047020	ENSGALT00000100281	NO
B Cell	ENSGALG00000041847	ENSGALT00000099342	NO
B Cell	ENSGALG00000042587	ENSGALT00000069547	NO
B Cell	ENSGALG00000047303	ENSGALT00000098746	NO
B Cell	ENSGALG00000047303	ENSGALT00000092601	NO
B Cell	ENSGALG00000052117	ENSGALT00000092918	NO
B Cell	ENSGALG00000047636	ENSGALT00000107394	NO
B Cell	ENSGALG00000047636	ENSGALT00000106965	NO
B Cell	ENSGALG00000047636	ENSGALT00000092976	NO
B Cell	107054605	XR_001469037	NO
B Cell	107054614	XR_001469072	NO
B Cell	ENSGALG00000053513	ENSGALT00000102971	NO
B Cell	ENSGALG00000053513	ENSGALT00000096828	NO
B Cell	ENSGALG00000049123	ENSGALT00000104925	NO
B Cell	ENSGALG00000049123	ENSGALT00000097662	NO
B Cell	ENSGALG00000037400	ENSGALT00000079589	NO
B Cell	ENSGALG00000037400	ENSGALT00000053231	NO
B Cell	ENSGALG00000049699	ENSGALT00000103212	NO
B Cell	ENSGALG00000049699	ENSGALT00000095695	NO
B Cell	ENSGALG00000049699	ENSGALT00000107026	NO
B Cell	107057040	XR_001471266	NO
B Cell	ENSGALG00000047046	ENSGALT00000101576	NO
B Cell	ENSGALG00000050337	ENSGALT00000098421	NO
B Cell	ENSGALG00000049762	ENSGALT00000105538	NO
B Cell	ENSGALG00000050502	ENSGALT00000091362	NO
B Cell	ENSGALG00000052074	ENSGALT00000091691	YES
B Cell	ENSGALG00000047743	ENSGALT00000099503	NO
B Cell	ENSGALG00000054222	ENSGALT00000097841	NO
B Cell	ENSGALG00000054222	ENSGALT00000067745	NO
B Cell	ENSGALG00000049855	ENSGALT00000095771	NO
B Cell	ENSGALG00000021405	ENSGALT00000103465	NO
B Cell	ENSGALG00000021405	ENSGALT00000034549	NO
B Cell	ENSGALG00000052765	ENSGALT00000091107	NO
B Cell	ENSGALG00000030684	ENSGALT00000061789	NO
B Cell	ENSGALG00000046820	ENSGALT00000104222	NO
B Cell	ENSGALG00000049331	ENSGALT00000106894	NO
B Cell	107054683	XR_001469192	NO
B Cell	107050912	XR_001462851	NO
B Cell	107050912	XR_001462850	NO
B Cell	ENSGALG00000037980	ENSGALT00000073934	NO
B Cell	ENSGALG00000048928	ENSGALT00000106116	NO
B Cell	ENSGALG00000048928	ENSGALT00000096334	NO
B Cell	107055593	XR_001470596	NO
B Cell	ENSGALG00000048374	ENSGALT00000095373	NO
B Cell	ENSGALG00000048322	ENSGALT00000101652	NO
B Cell	ENSGALG00000048322	ENSGALT00000091805	NO
B Cell	ENSGALG00000052058	ENSGALT00000107962	NO
B Cell	ENSGALG00000037079	ENSGALT00000065208	NO
B Cell	107052197	XR_001464490	NO
B Cell	107052198	XR_001464491	NO
B Cell	ENSGALG00000053940	ENSGALT00000105894	NO
B Cell	ENSGALG00000050998	ENSGALT00000093690	NO
B Cell	ENSGALG00000047155	ENSGALT00000105819	NO
B Cell	ENSGALG00000050980	ENSGALT00000098255	NO
B Cell	ENSGALG00000050980	ENSGALT00000102974	NO
B Cell	ENSGALG00000052727	ENSGALT00000105841	NO
B Cell	ENSGALG00000051816	ENSGALT00000094926	NO
B Cell	ENSGALG00000048243	ENSGALT00000094363	NO
B Cell	107054736	XR_001469317	NO
B Cell	ENSGALG00000049195	ENSGALT00000098160	NO
B Cell	ENSGALG00000049195	ENSGALT00000106249	NO
B Cell	ENSGALG00000049195	ENSGALT00000103321	NO
B Cell	ENSGALG00000050116	ENSGALT00000106804	NO
B Cell	ENSGALG00000041778	ENSGALT00000103940	NO
B Cell	ENSGALG00000041778	ENSGALT00000105257	NO
B Cell	ENSGALG00000041778	ENSGALT00000074623	NO
B Cell	ENSGALG00000053746	ENSGALT00000102656	NO
B Cell	ENSGALG00000051036	ENSGALT00000106134	NO
B Cell	ENSGALG00000036788	ENSGALT00000105454	NO
B Cell	ENSGALG00000036788	ENSGALT00000075148	NO
B Cell	ENSGALG00000029249	ENSGALT00000070815	NO
B Cell	ENSGALG00000029249	ENSGALT00000058819	NO
B Cell	ENSGALG00000037717	ENSGALT00000104731	NO
B Cell	ENSGALG00000038575	ENSGALT00000076521	NO
B Cell	ENSGALG00000019795	ENSGALT00000031441	NO
B Cell	ENSGALG00000045137	ENSGALT00000089613	NO
B Cell	ENSGALG00000051742	ENSGALT00000092478	NO
B Cell	107054753	XR_001469352	NO
B Cell	107054753	XR_001469351	NO
B Cell	107054751	XR_001469345	NO
B Cell	ENSGALG00000048413	ENSGALT00000101284	NO
B Cell	ENSGALG00000052276	ENSGALT00000094351	YES
B Cell	ENSGALG00000047339	ENSGALT00000100116	NO
B Cell	ENSGALG00000048232	ENSGALT00000103606	NO
B Cell	ENSGALG00000047455	ENSGALT00000104352	NO
B Cell	ENSGALG00000032816	ENSGALT00000059644	NO
B Cell	ENSGALG00000030792	ENSGALT00000080413	NO
B Cell	ENSGALG00000001885	ENSGALT00000002921	NO
B Cell	ENSGALG00000054047	ENSGALT00000104737	NO
B Cell	ENSGALG00000053249	ENSGALT00000093865	NO
B Cell	ENSGALG00000054757	ENSGALT00000102817	NO
B Cell	ENSGALG00000040065	ENSGALT00000059203	NO
B Cell	ENSGALG00000035464	ENSGALT00000066877	NO
B Cell	ENSGALG00000047735	ENSGALT00000104987	NO
B Cell	ENSGALG00000047735	ENSGALT00000093146	NO
B Cell	ENSGALG00000030982	ENSGALT00000062533	NO
B Cell	ENSGALG00000050465	ENSGALT00000096689	NO
B Cell	ENSGALG00000048146	ENSGALT00000096337	NO
B Cell	ENSGALG00000053469	ENSGALT00000105954	NO
B Cell	ENSGALG00000054055	ENSGALT00000097203	NO
B Cell	ENSGALG00000048424	ENSGALT00000099900	YES
B Cell	ENSGALG00000047674	ENSGALT00000102050	NO
B Cell	ENSGALG00000047674	ENSGALT00000098522	NO
B Cell	ENSGALG00000049129	ENSGALT00000099218	NO
B Cell	ENSGALG00000047326	ENSGALT00000096212	NO
B Cell	ENSGALG00000051873	ENSGALT00000102335	YES
B Cell	ENSGALG00000050129	ENSGALT00000096832	NO
B Cell	107052592	XR_001465181	NO
B Cell	ENSGALG00000049482	ENSGALT00000096362	NO
B Cell	ENSGALG00000045235	ENSGALT00000085481	NO
B Cell	107052579	XR_001465165	NO
B Cell	ENSGALG00000049403	ENSGALT00000108143	NO
B Cell	ENSGALG00000049804	ENSGALT00000093195	NO
B Cell	101747260	XR_211570	NO
B Cell	ENSGALG00000053190	ENSGALT00000094158	NO
B Cell	ENSGALG00000049978	ENSGALT00000101268	NO
B Cell	ENSGALG00000036148	ENSGALT00000065942	NO
B Cell	107052526	XR_001465064	NO
B Cell	ENSGALG00000053738	ENSGALT00000095329	NO
B Cell	ENSGALG00000053738	ENSGALT00000097414	NO
B Cell	ENSGALG00000030111	ENSGALT00000059036	NO
B Cell	ENSGALG00000030111	ENSGALT00000103320	NO
B Cell	ENSGALG00000050651	ENSGALT00000092816	NO
B Cell	ENSGALG00000050651	ENSGALT00000098483	NO
B Cell	ENSGALG00000049242	ENSGALT00000094838	NO
B Cell	ENSGALG00000048667	ENSGALT00000106569	NO
B Cell	ENSGALG00000048490	ENSGALT00000107840	NO
B Cell	ENSGALG00000052383	ENSGALT00000092818	NO
B Cell	ENSGALG00000047333	ENSGALT00000102638	NO
B Cell	ENSGALG00000052888	ENSGALT00000105158	NO
B Cell	ENSGALG00000035828	ENSGALT00000062581	NO
B Cell	ENSGALG00000019568	ENSGALT00000031045	NO
B Cell	ENSGALG00000019568	ENSGALT00000100854	NO
B Cell	ENSGALG00000051619	ENSGALT00000106266	NO
B Cell	ENSGALG00000049319	ENSGALT00000090673	NO
B Cell	ENSGALG00000052392	ENSGALT00000099606	NO
B Cell	ENSGALG00000050367	ENSGALT00000095696	NO
B Cell	ENSGALG00000050709	ENSGALT00000100860	NO
B Cell	ENSGALG00000047657	ENSGALT00000100300	NO
B Cell	ENSGALG00000053586	ENSGALT00000102260	NO
B Cell	ENSGALG00000048796	ENSGALT00000103310	NO
B Cell	ENSGALG00000053485	ENSGALT00000104866	NO
B Cell	ENSGALG00000053290	ENSGALT00000093046	NO
B Cell	ENSGALG00000054853	ENSGALT00000105616	NO
B Cell	ENSGALG00000029474	ENSGALT00000075249	NO
B Cell	ENSGALG00000054929	ENSGALT00000101260	NO
B Cell	ENSGALG00000052967	ENSGALT00000096898	NO
B Cell	ENSGALG00000049144	ENSGALT00000104332	NO
B Cell	ENSGALG00000050729	ENSGALT00000107229	NO
B Cell	ENSGALG00000047188	ENSGALT00000097331	NO
B Cell	ENSGALG00000050232	ENSGALT00000091191	NO
B Cell	ENSGALG00000052364	ENSGALT00000097245	NO
B Cell	107052777	XR_001465498	NO
B Cell	ENSGALG00000048571	ENSGALT00000098047	NO
B Cell	ENSGALG00000052069	ENSGALT00000098998	NO
B Cell	ENSGALG00000052069	ENSGALT00000090725	NO
B Cell	ENSGALG00000048571	ENSGALT00000090953	NO
B Cell	ENSGALG00000052841	ENSGALT00000104451	NO
B Cell	ENSGALG00000051414	ENSGALT00000107342	NO
B Cell	ENSGALG00000033453	ENSGALT00000071481	NO
B Cell	ENSGALG00000047548	ENSGALT00000102139	NO
B Cell	ENSGALG00000047850	ENSGALT00000104123	NO
B Cell	ENSGALG00000052658	ENSGALT00000094905	NO
B Cell	ENSGALG00000049289	ENSGALT00000104289	NO
B Cell	ENSGALG00000032552	ENSGALT00000060731	NO
B Cell	ENSGALG00000029930	ENSGALT00000106163	NO
B Cell	ENSGALG00000051810	ENSGALT00000094483	NO
B Cell	ENSGALG00000038484	ENSGALT00000080339	NO
B Cell	ENSGALG00000054208	ENSGALT00000099986	NO
B Cell	107054874	XR_001469659	NO
B Cell	107054873	XR_001469658	NO
B Cell	ENSGALG00000037111	ENSGALT00000079662	NO
B Cell	ENSGALG00000049365	ENSGALT00000101107	NO
B Cell	ENSGALG00000048703	ENSGALT00000092826	NO
B Cell	101750846	XR_001469626	NO
B Cell	ENSGALG00000047130	ENSGALT00000096574	NO
B Cell	ENSGALG00000036091	ENSGALT00000051425	NO
B Cell	ENSGALG00000040130	ENSGALT00000069012	NO
B Cell	ENSGALG00000052659	ENSGALT00000102031	NO
B Cell	ENSGALG00000054116	ENSGALT00000105044	NO
B Cell	ENSGALG00000054528	ENSGALT00000092663	NO
B Cell	ENSGALG00000030165	ENSGALT00000075923	NO
B Cell	ENSGALG00000052083	ENSGALT00000091515	NO
B Cell	ENSGALG00000055086	ENSGALT00000106417	NO
B Cell	ENSGALG00000055005	ENSGALT00000103706	NO
B Cell	ENSGALG00000052384	ENSGALT00000097861	NO
B Cell	ENSGALG00000052112	ENSGALT00000099062	NO
B Cell	ENSGALG00000033093	ENSGALT00000066122	NO
B Cell	ENSGALG00000047991	ENSGALT00000101119	NO
B Cell	ENSGALG00000047991	ENSGALT00000092762	NO
B Cell	ENSGALG00000035976	ENSGALT00000072846	NO
B Cell	ENSGALG00000051674	ENSGALT00000098268	NO
B Cell	ENSGALG00000051674	ENSGALT00000104728	NO
B Cell	ENSGALG00000039864	ENSGALT00000076111	NO
B Cell	ENSGALG00000047157	ENSGALT00000093024	NO
B Cell	ENSGALG00000052519	ENSGALT00000103643	NO
B Cell	ENSGALG00000049768	ENSGALT00000095485	NO
B Cell	ENSGALG00000049768	ENSGALT00000095421	NO
B Cell	ENSGALG00000052619	ENSGALT00000104787	NO
B Cell	ENSGALG00000048271	ENSGALT00000091939	NO
B Cell	ENSGALG00000048271	ENSGALT00000092291	NO
B Cell	ENSGALG00000049015	ENSGALT00000101941	NO
B Cell	ENSGALG00000049015	ENSGALT00000100638	NO
B Cell	ENSGALG00000049015	ENSGALT00000096759	NO
B Cell	ENSGALG00000036040	ENSGALT00000078169	NO
B Cell	ENSGALG00000041611	ENSGALT00000068202	NO
B Cell	ENSGALG00000041611	ENSGALT00000059177	NO
B Cell	ENSGALG00000055093	ENSGALT00000100916	NO
B Cell	ENSGALG00000047846	ENSGALT00000096804	NO
B Cell	ENSGALG00000048848	ENSGALT00000108010	NO
B Cell	ENSGALG00000055135	ENSGALT00000098187	NO
B Cell	ENSGALG00000054143	ENSGALT00000105320	NO
B Cell	ENSGALG00000048403	ENSGALT00000099845	NO
B Cell	ENSGALG00000053317	ENSGALT00000099811	NO
B Cell	ENSGALG00000053317	ENSGALT00000090519	NO
B Cell	ENSGALG00000048379	ENSGALT00000003963	NO
B Cell	ENSGALG00000055112	ENSGALT00000094275	NO
B Cell	ENSGALG00000006584	ENSGALT00000100487	NO
B Cell	ENSGALG00000006584	ENSGALT00000100586	NO
B Cell	ENSGALG00000035117	ENSGALT00000055582	NO
B Cell	ENSGALG00000044339	ENSGALT00000087845	NO
B Cell	ENSGALG00000053849	ENSGALT00000096265	NO
B Cell	ENSGALG00000052320	ENSGALT00000097187	NO
B Cell	ENSGALG00000046765	ENSGALT00000096718	NO
B Cell	ENSGALG00000037026	ENSGALT00000105151	NO
B Cell	ENSGALG00000037026	ENSGALT00000077801	NO
B Cell	ENSGALG00000051467	ENSGALT00000093845	NO
B Cell	ENSGALG00000051467	ENSGALT00000102766	NO
B Cell	ENSGALG00000054815	ENSGALT00000103951	NO
B Cell	ENSGALG00000048377	ENSGALT00000104298	NO
B Cell	107049674	XR_001462023	NO
B Cell	ENSGALG00000047570	ENSGALT00000101956	NO
B Cell	ENSGALG00000054872	ENSGALT00000091424	NO
B Cell	ENSGALG00000053036	ENSGALT00000094982	NO
B Cell	ENSGALG00000028346	ENSGALT00000045498	NO
B Cell	ENSGALG00000051835	ENSGALT00000091720	NO
B Cell	ENSGALG00000044191	ENSGALT00000089578	NO
B Cell	ENSGALG00000048610	ENSGALT00000095566	NO
B Cell	ENSGALG00000050325	ENSGALT00000094727	NO
B Cell	ENSGALG00000035554	ENSGALT00000081850	NO
B Cell	ENSGALG00000035554	ENSGALT00000105868	NO
B Cell	ENSGALG00000035554	ENSGALT00000106021	NO
B Cell	ENSGALG00000054434	ENSGALT00000102118	NO
B Cell	ENSGALG00000050999	ENSGALT00000097337	NO
B Cell	ENSGALG00000040313	ENSGALT00000069177	NO
B Cell	107055325	XR_001470383	NO
B Cell	ENSGALG00000024395	ENSGALT00000041273	NO
B Cell	ENSGALG00000049825	ENSGALT00000093279	NO
B Cell	ENSGALG00000033094	ENSGALT00000055619	NO
B Cell	ENSGALG00000052514	ENSGALT00000092556	NO
B Cell	ENSGALG00000051484	ENSGALT00000095118	NO
B Cell	ENSGALG00000052626	ENSGALT00000102241	NO
B Cell	ENSGALG00000052626	ENSGALT00000093596	NO
B Cell	ENSGALG00000042222	ENSGALT00000070751	NO
B Cell	ENSGALG00000054899	ENSGALT00000090484	YES
B Cell	ENSGALG00000054899	ENSGALT00000097700	YES
B Cell	ENSGALG00000047366	ENSGALT00000104124	NO
B Cell	ENSGALG00000054854	ENSGALT00000107985	NO
B Cell	ENSGALG00000052361	ENSGALT00000102272	NO
B Cell	ENSGALG00000054844	ENSGALT00000090806	NO
B Cell	ENSGALG00000042483	ENSGALT00000053100	NO
B Cell	ENSGALG00000042483	ENSGALT00000093924	NO
B Cell	ENSGALG00000046970	ENSGALT00000100775	NO
B Cell	ENSGALG00000055124	ENSGALT00000098139	NO
B Cell	107052011	XR_001464085	NO
B Cell	ENSGALG00000054896	ENSGALT00000090480	NO
B Cell	ENSGALG00000054896	ENSGALT00000100223	NO
B Cell	ENSGALG00000033140	ENSGALT00000058794	NO
B Cell	ENSGALG00000033140	ENSGALT00000073309	NO
B Cell	ENSGALG00000033140	ENSGALT00000051690	NO
B Cell	ENSGALG00000041996	ENSGALT00000093928	NO
B Cell	ENSGALG00000032298	ENSGALT00000081931	NO
B Cell	ENSGALG00000053539	ENSGALT00000100020	NO
B Cell	ENSGALG00000042313	ENSGALT00000059490	NO
B Cell	ENSGALG00000045060	ENSGALT00000104926	NO
B Cell	ENSGALG00000045060	ENSGALT00000085477	NO
B Cell	107052939	XR_001465778	NO
B Cell	ENSGALG00000053693	ENSGALT00000100773	NO
B Cell	ENSGALG00000051803	ENSGALT00000101954	NO
B Cell	ENSGALG00000054263	ENSGALT00000096770	NO
B Cell	ENSGALG00000029830	ENSGALT00000066894	NO
B Cell	ENSGALG00000050471	ENSGALT00000102668	NO
B Cell	107052971	XR_001465829	NO
B Cell	ENSGALG00000052040	ENSGALT00000091964	NO
B Cell	ENSGALG00000041906	ENSGALT00000064789	NO
B Cell	ENSGALG00000047386	ENSGALT00000106720	YES
B Cell	ENSGALG00000054084	ENSGALT00000101864	NO
B Cell	ENSGALG00000033206	ENSGALT00000062418	NO
B Cell	ENSGALG00000033206	ENSGALT00000092789	NO
B Cell	ENSGALG00000052212	ENSGALT00000093778	NO
B Cell	ENSGALG00000052212	ENSGALT00000104211	YES
B Cell	ENSGALG00000052212	ENSGALT00000108219	NO
B Cell	ENSGALG00000044686	ENSGALT00000088491	NO
B Cell	ENSGALG00000037628	ENSGALT00000058284	YES
B Cell	ENSGALG00000037628	ENSGALT00000106869	YES
B Cell	ENSGALG00000049943	ENSGALT00000103227	NO
B Cell	ENSGALG00000051083	ENSGALT00000092615	NO
B Cell	ENSGALG00000053255	ENSGALT00000094147	NO
B Cell	ENSGALG00000048797	ENSGALT00000098583	NO
B Cell	ENSGALG00000049997	ENSGALT00000103293	NO
B Cell	ENSGALG00000051317	ENSGALT00000106328	NO
B Cell	107053020	XR_001465925	YES
B Cell	ENSGALG00000049405	ENSGALT00000105765	NO
B Cell	ENSGALG00000051692	ENSGALT00000093759	NO
B Cell	ENSGALG00000051692	ENSGALT00000103239	NO
B Cell	ENSGALG00000030501	ENSGALT00000077666	NO
B Cell	ENSGALG00000053814	ENSGALT00000105198	NO
B Cell	ENSGALG00000047205	ENSGALT00000094755	NO
B Cell	ENSGALG00000053814	ENSGALT00000106133	NO
B Cell	ENSGALG00000053557	ENSGALT00000107163	NO
B Cell	107052994	XR_001465867	NO
B Cell	ENSGALG00000049814	ENSGALT00000106559	NO
B Cell	ENSGALG00000029204	ENSGALT00000047066	NO
B Cell	ENSGALG00000038720	ENSGALT00000071214	NO
B Cell	ENSGALG00000038720	ENSGALT00000047470	NO
B Cell	ENSGALG00000038720	ENSGALT00000105172	NO
B Cell	ENSGALG00000049077	ENSGALT00000103596	NO
B Cell	ENSGALG00000055087	ENSGALT00000095682	NO
B Cell	ENSGALG00000055087	ENSGALT00000093629	NO
B Cell	ENSGALG00000051915	ENSGALT00000105465	NO
B Cell	ENSGALG00000053208	ENSGALT00000103924	NO
B Cell	ENSGALG00000054515	ENSGALT00000094433	NO
B Cell	ENSGALG00000048587	ENSGALT00000104701	NO
B Cell	ENSGALG00000050842	ENSGALT00000105381	NO
B Cell	ENSGALG00000052055	ENSGALT00000094424	NO
B Cell	ENSGALG00000052055	ENSGALT00000102937	NO
B Cell	ENSGALG00000052055	ENSGALT00000106285	NO
B Cell	ENSGALG00000051332	ENSGALT00000092713	NO
B Cell	ENSGALG00000050769	ENSGALT00000107169	NO
B Cell	ENSGALG00000052704	ENSGALT00000097520	NO
B Cell	ENSGALG00000053660	ENSGALT00000091458	NO
B Cell	ENSGALG00000053695	ENSGALT00000101074	NO
B Cell	ENSGALG00000053388	ENSGALT00000107276	NO
B Cell	ENSGALG00000053197	ENSGALT00000095155	NO
B Cell	ENSGALG00000051253	ENSGALT00000091166	NO
B Cell	ENSGALG00000052495	ENSGALT00000093953	NO
B Cell	ENSGALG00000049161	ENSGALT00000094703	NO
B Cell	ENSGALG00000048607	ENSGALT00000101315	NO
B Cell	ENSGALG00000043731	ENSGALT00000059828	NO
B Cell	ENSGALG00000048454	ENSGALT00000105488	NO
B Cell	ENSGALG00000048206	ENSGALT00000103056	NO
B Cell	ENSGALG00000052746	ENSGALT00000102110	NO
B Cell	ENSGALG00000046987	ENSGALT00000094066	NO
B Cell	ENSGALG00000046987	ENSGALT00000102362	NO
B Cell	ENSGALG00000055097	ENSGALT00000092616	NO
B Cell	ENSGALG00000052509	ENSGALT00000099746	NO
B Cell	ENSGALG00000046971	ENSGALT00000103935	NO
B Cell	ENSGALG00000046971	ENSGALT00000101013	NO
B Cell	107051077	XR_001462965	NO
B Cell	ENSGALG00000049500	ENSGALT00000099477	NO
B Cell	ENSGALG00000050015	ENSGALT00000103372	NO
B Cell	ENSGALG00000048987	ENSGALT00000106937	NO
B Cell	ENSGALG00000052845	ENSGALT00000094094	NO
B Cell	ENSGALG00000053404	ENSGALT00000105569	NO
B Cell	ENSGALG00000053404	ENSGALT00000107039	NO
B Cell	107050211	XR_001462463	NO
B Cell	ENSGALG00000054578	ENSGALT00000101392	NO
B Cell	ENSGALG00000054072	ENSGALT00000099140	NO
B Cell	ENSGALG00000051047	ENSGALT00000107202	NO
B Cell	ENSGALG00000051047	ENSGALT00000100624	NO
B Cell	ENSGALG00000047276	ENSGALT00000095177	NO
B Cell	ENSGALG00000050985	ENSGALT00000091137	NO
B Cell	ENSGALG00000052324	ENSGALT00000106506	NO
B Cell	ENSGALG00000052451	ENSGALT00000096292	NO
B Cell	ENSGALG00000052451	ENSGALT00000097914	NO
B Cell	107049828	XR_001462172	NO
B Cell	ENSGALG00000051630	ENSGALT00000099402	NO
B Cell	107051441	XR_001463121	NO
B Cell	107051487	XR_001463140	NO
B Cell	107049206	XR_001461701	NO
B Cell	107051555	XR_001463173	NO
B Cell	ENSGALG00000053923	ENSGALT00000094427	NO
B Cell	ENSGALG00000053923	ENSGALT00000107654	NO
B Cell	ENSGALG00000051271	ENSGALT00000099398	NO
B Cell	ENSGALG00000051271	ENSGALT00000099549	NO
B Cell	ENSGALG00000052713	ENSGALT00000106636	NO
B Cell	ENSGALG00000050775	ENSGALT00000104239	NO
B Cell	ENSGALG00000050775	ENSGALT00000093659	NO
B Cell	ENSGALG00000053167	ENSGALT00000107370	NO
B Cell	ENSGALG00000037295	ENSGALT00000046663	NO
B Cell	ENSGALG00000047998	ENSGALT00000102066	NO
B Cell	ENSGALG00000046902	ENSGALT00000091510	NO
B Cell	ENSGALG00000055106	ENSGALT00000098265	NO
B Cell	ENSGALG00000055106	ENSGALT00000108043	NO
B Cell	ENSGALG00000049883	ENSGALT00000095813	NO
B Cell	ENSGALG00000049883	ENSGALT00000101079	NO
B Cell	ENSGALG00000051169	ENSGALT00000092369	NO
B Cell	ENSGALG00000047410	ENSGALT00000102091	NO
B Cell	ENSGALG00000047410	ENSGALT00000094544	NO
B Cell	ENSGALG00000047410	ENSGALT00000105189	NO
B Cell	ENSGALG00000047219	ENSGALT00000104964	NO
B Cell	ENSGALG00000047219	ENSGALT00000090455	NO
B Cell	107052038	XR_001464144	NO
B Cell	ENSGALG00000020320	ENSGALT00000102109	NO
B Cell	ENSGALG00000020320	ENSGALT00000032405	NO
B Cell	101749419	XR_001464169	NO
B Cell	101749419	XR_001464168	NO
B Cell	ENSGALG00000041397	ENSGALT00000101064	NO
B Cell	ENSGALG00000048578	ENSGALT00000093668	NO
B Cell	ENSGALG00000055103	ENSGALT00000100810	YES
B Cell	ENSGALG00000050193	ENSGALT00000106734	YES
B Cell	ENSGALG00000047730	ENSGALT00000090524	NO
B Cell	ENSGALG00000051373	ENSGALT00000105536	NO
B Cell	ENSGALG00000054354	ENSGALT00000096019	NO
B Cell	ENSGALG00000054878	ENSGALT00000090793	NO
B Cell	107052084	XR_001464223	NO
B Cell	ENSGALG00000052899	ENSGALT00000102691	NO
B Cell	ENSGALG00000050162	ENSGALT00000098932	NO
B Cell	ENSGALG00000050162	ENSGALT00000093516	NO
B Cell	ENSGALG00000049528	ENSGALT00000104997	NO
B Cell	ENSGALG00000049528	ENSGALT00000105647	NO
B Cell	ENSGALG00000054233	ENSGALT00000104709	NO
B Cell	ENSGALG00000050541	ENSGALT00000093685	NO
B Cell	ENSGALG00000051315	ENSGALT00000098615	YES
B Cell	ENSGALG00000054537	ENSGALT00000106750	NO
B Cell	107051806	XR_001463708	NO
B Cell	ENSGALG00000043141	ENSGALT00000053190	NO
B Cell	ENSGALG00000048950	ENSGALT00000104517	NO
B Cell	ENSGALG00000047892	ENSGALT00000105951	NO
B Cell	107051777	XR_001463655	NO
B Cell	107051776	XR_001463654	NO
B Cell	ENSGALG00000046936	ENSGALT00000098277	NO
B Cell	ENSGALG00000037040	ENSGALT00000060460	NO
B Cell	ENSGALG00000037040	ENSGALT00000056435	NO
B Cell	ENSGALG00000051889	ENSGALT00000103146	NO
B Cell	ENSGALG00000049674	ENSGALT00000101353	NO
B Cell	ENSGALG00000046733	ENSGALT00000107373	NO
B Cell	ENSGALG00000053686	ENSGALT00000101475	NO
B Cell	ENSGALG00000053686	ENSGALT00000092758	NO
B Cell	ENSGALG00000053686	ENSGALT00000097030	NO
B Cell	ENSGALG00000054742	ENSGALT00000095524	NO
B Cell	ENSGALG00000054742	ENSGALT00000103475	NO
B Cell	ENSGALG00000052549	ENSGALT00000092779	NO
B Cell	ENSGALG00000051314	ENSGALT00000102883	NO
B Cell	ENSGALG00000053080	ENSGALT00000093913	NO
B Cell	ENSGALG00000053080	ENSGALT00000101176	NO
B Cell	ENSGALG00000039688	ENSGALT00000056708	NO
B Cell	ENSGALG00000050529	ENSGALT00000094673	YES
B Cell	ENSGALG00000048901	ENSGALT00000093091	NO
B Cell	107051707	XR_001463502	NO
B Cell	107051708	XR_001463505	NO
B Cell	ENSGALG00000050183	ENSGALT00000097880	NO
B Cell	ENSGALG00000047368	ENSGALT00000098346	NO
B Cell	ENSGALG00000050113	ENSGALT00000100385	NO
B Cell	ENSGALG00000054403	ENSGALT00000098372	NO
B Cell	ENSGALG00000053319	ENSGALT00000097908	NO
B Cell	107053234	XR_001466310	NO
B Cell	ENSGALG00000051262	ENSGALT00000098678	NO
B Cell	ENSGALG00000046887	ENSGALT00000105061	NO
B Cell	ENSGALG00000046981	ENSGALT00000103028	NO
B Cell	ENSGALG00000048634	ENSGALT00000092532	NO
B Cell	ENSGALG00000052273	ENSGALT00000091200	NO
B Cell	ENSGALG00000052273	ENSGALT00000098760	NO
B Cell	ENSGALG00000052189	ENSGALT00000102544	NO
B Cell	ENSGALG00000044501	ENSGALT00000088776	NO
B Cell	ENSGALG00000035064	ENSGALT00000077592	NO
B Cell	ENSGALG00000051300	ENSGALT00000108062	NO
B Cell	ENSGALG00000030266	ENSGALT00000096280	NO
B Cell	ENSGALG00000030266	ENSGALT00000055681	NO
B Cell	ENSGALG00000049914	ENSGALT00000108213	NO
B Cell	ENSGALG00000020510	ENSGALT00000032726	NO
B Cell	ENSGALG00000034894	ENSGALT00000061765	NO
B Cell	ENSGALG00000054203	ENSGALT00000093477	NO
B Cell	ENSGALG00000054893	ENSGALT00000099876	NO
B Cell	ENSGALG00000047791	ENSGALT00000106731	NO
B Cell	ENSGALG00000036861	ENSGALT00000077910	NO
B Cell	ENSGALG00000051601	ENSGALT00000103433	NO
B Cell	ENSGALG00000050751	ENSGALT00000099582	NO
B Cell	ENSGALG00000046978	ENSGALT00000106386	NO
B Cell	ENSGALG00000051736	ENSGALT00000098764	NO
B Cell	ENSGALG00000033009	ENSGALT00000090552	NO
B Cell	ENSGALG00000053237	ENSGALT00000092356	NO
B Cell	ENSGALG00000053627	ENSGALT00000090454	NO
B Cell	ENSGALG00000053627	ENSGALT00000098716	NO
B Cell	107053443	XR_001466683	NO
B Cell	ENSGALG00000053591	ENSGALT00000106016	NO
B Cell	ENSGALG00000053591	ENSGALT00000091935	NO
B Cell	ENSGALG00000054960	ENSGALT00000095921	NO
B Cell	ENSGALG00000054960	ENSGALT00000015448	NO
B Cell	ENSGALG00000051107	ENSGALT00000105032	NO
B Cell	107053488	XR_001466753	YES
B Cell	ENSGALG00000054613	ENSGALT00000101892	NO
B Cell	ENSGALG00000051208	ENSGALT00000107912	NO
B Cell	107053509	XR_001466796	NO
B Cell	ENSGALG00000053768	ENSGALT00000107575	NO
B Cell	ENSGALG00000053559	ENSGALT00000103979	NO
B Cell	ENSGALG00000053559	ENSGALT00000102283	NO
B Cell	107053522	XR_001466845	NO
B Cell	ENSGALG00000047714	ENSGALT00000091798	NO
B Cell	ENSGALG00000047714	ENSGALT00000100102	NO
B Cell	ENSGALG00000053551	ENSGALT00000046886	NO
B Cell	107053536	XR_001466885	NO
B Cell	107053543	XR_001466897	NO
B Cell	ENSGALG00000052029	ENSGALT00000108136	NO
B Cell	ENSGALG00000048425	ENSGALT00000097648	NO
B Cell	ENSGALG00000048425	ENSGALT00000100929	NO
B Cell	ENSGALG00000042588	ENSGALT00000066654	NO
B Cell	ENSGALG00000042588	ENSGALT00000093616	NO
B Cell	ENSGALG00000053645	ENSGALT00000092413	NO
B Cell	ENSGALG00000053496	ENSGALT00000094423	YES
B Cell	ENSGALG00000037747	ENSGALT00000058414	NO
B Cell	ENSGALG00000037747	ENSGALT00000056136	NO
B Cell	ENSGALG00000050191	ENSGALT00000097650	NO
B Cell	ENSGALG00000049625	ENSGALT00000096048	NO
B Cell	ENSGALG00000049625	ENSGALT00000102857	NO
B Cell	ENSGALG00000043392	ENSGALT00000093653	NO
B Cell	ENSGALG00000049867	ENSGALT00000095719	NO
B Cell	ENSGALG00000049404	ENSGALT00000100988	NO
B Cell	ENSGALG00000054569	ENSGALT00000100008	NO
B Cell	ENSGALG00000053040	ENSGALT00000105736	NO
B Cell	ENSGALG00000048488	ENSGALT00000096941	NO
B Cell	ENSGALG00000047881	ENSGALT00000097459	NO
B Cell	ENSGALG00000053086	ENSGALT00000094651	NO
B Cell	ENSGALG00000050884	ENSGALT00000095455	NO
B Cell	ENSGALG00000050884	ENSGALT00000104171	NO
B Cell	ENSGALG00000047676	ENSGALT00000104356	NO
B Cell	ENSGALG00000050680	ENSGALT00000100885	NO
B Cell	101749147	XR_001467053	NO
B Cell	ENSGALG00000048462	ENSGALT00000099870	NO
B Cell	ENSGALG00000045809	ENSGALT00000084587	NO
B Cell	ENSGALG00000053342	ENSGALT00000099369	NO
B Cell	ENSGALG00000053729	ENSGALT00000107011	NO
B Cell	ENSGALG00000051696	ENSGALT00000105324	NO
B Cell	ENSGALG00000051696	ENSGALT00000095861	NO
B Cell	ENSGALG00000053844	ENSGALT00000108071	NO
B Cell	ENSGALG00000031024	ENSGALT00000062485	NO
B Cell	ENSGALG00000050169	ENSGALT00000096962	NO
B Cell	ENSGALG00000004167	ENSGALT00000006627	NO
B Cell	ENSGALG00000004653	ENSGALT00000007414	NO
B Cell	ENSGALG00000054850	ENSGALT00000093646	NO
B Cell	ENSGALG00000054850	ENSGALT00000101776	NO
B Cell	ENSGALG00000047654	ENSGALT00000090509	NO
B Cell	ENSGALG00000034133	ENSGALT00000075421	NO
B Cell	ENSGALG00000034133	ENSGALT00000077135	NO
B Cell	ENSGALG00000054579	ENSGALT00000093117	NO
B Cell	ENSGALG00000049049	ENSGALT00000091544	YES
B Cell	107053675	XR_001467169	NO
B Cell	ENSGALG00000049384	ENSGALT00000100674	NO
B Cell	ENSGALG00000054709	ENSGALT00000090581	NO
B Cell	ENSGALG00000054411	ENSGALT00000098095	NO
B Cell	ENSGALG00000047645	ENSGALT00000105046	NO
B Cell	ENSGALG00000050495	ENSGALT00000093401	NO
B Cell	ENSGALG00000054429	ENSGALT00000099973	NO
B Cell	ENSGALG00000050084	ENSGALT00000101583	NO
B Cell	ENSGALG00000052530	ENSGALT00000103636	NO
B Cell	ENSGALG00000040416	ENSGALT00000106403	NO
B Cell	ENSGALG00000046882	ENSGALT00000101834	YES
B Cell	ENSGALG00000046882	ENSGALT00000092302	YES
B Cell	ENSGALG00000050770	ENSGALT00000100321	YES
B Cell	ENSGALG00000050770	ENSGALT00000091855	YES
B Cell	ENSGALG00000050770	ENSGALT00000100505	YES
B Cell	ENSGALG00000047490	ENSGALT00000108190	NO
B Cell	107053697	XR_001467208	NO
B Cell	ENSGALG00000037616	ENSGALT00000069473	NO
B Cell	ENSGALG00000050428	ENSGALT00000106907	YES
B Cell	107053732	XR_001467273	YES
B Cell	ENSGALG00000035332	ENSGALT00000068355	NO
B Cell	ENSGALG00000048500	ENSGALT00000091639	NO
B Cell	ENSGALG00000048500	ENSGALT00000098329	NO
B Cell	ENSGALG00000051840	ENSGALT00000093798	NO
B Cell	ENSGALG00000049429	ENSGALT00000090690	NO
B Cell	ENSGALG00000049429	ENSGALT00000101349	NO
B Cell	ENSGALG00000051175	ENSGALT00000103861	NO
B Cell	ENSGALG00000051175	ENSGALT00000101934	NO
B Cell	107053752	XR_001467314	NO
B Cell	ENSGALG00000033282	ENSGALT00000068007	NO
B Cell	ENSGALG00000033282	ENSGALT00000075624	NO
B Cell	ENSGALG00000049945	ENSGALT00000100390	NO
B Cell	ENSGALG00000049945	ENSGALT00000096823	NO
B Cell	ENSGALG00000053979	ENSGALT00000090563	NO
B Cell	ENSGALG00000049457	ENSGALT00000101110	NO
B Cell	ENSGALG00000048801	ENSGALT00000094020	NO
B Cell	ENSGALG00000048801	ENSGALT00000101298	NO
B Cell	ENSGALG00000048405	ENSGALT00000095966	NO
B Cell	ENSGALG00000050863	ENSGALT00000099449	NO
B Cell	ENSGALG00000050863	ENSGALT00000107821	NO
B Cell	ENSGALG00000046782	ENSGALT00000107512	NO
B Cell	ENSGALG00000049221	ENSGALT00000103374	NO
B Cell	ENSGALG00000053678	ENSGALT00000105621	NO
B Cell	ENSGALG00000053678	ENSGALT00000101150	NO
B Cell	ENSGALG00000051221	ENSGALT00000106142	NO
B Cell	ENSGALG00000049994	ENSGALT00000090642	NO
B Cell	ENSGALG00000050164	ENSGALT00000090785	NO
B Cell	ENSGALG00000051094	ENSGALT00000090485	NO
B Cell	ENSGALG00000049401	ENSGALT00000106911	NO
B Cell	ENSGALG00000049928	ENSGALT00000105216	NO
B Cell	ENSGALG00000049928	ENSGALT00000105180	NO
B Cell	ENSGALG00000042752	ENSGALT00000068523	YES
B Cell	ENSGALG00000054456	ENSGALT00000102399	NO
B Cell	ENSGALG00000055018	ENSGALT00000103914	NO
B Cell	ENSGALG00000049931	ENSGALT00000101498	NO
B Cell	ENSGALG00000054414	ENSGALT00000095979	NO
B Cell	ENSGALG00000052245	ENSGALT00000099224	NO
B Cell	ENSGALG00000052245	ENSGALT00000095715	NO
B Cell	ENSGALG00000052000	ENSGALT00000107957	NO
B Cell	ENSGALG00000049781	ENSGALT00000100501	NO
B Cell	ENSGALG00000049781	ENSGALT00000090707	NO
B Cell	ENSGALG00000049133	ENSGALT00000108186	NO
B Cell	ENSGALG00000049133	ENSGALT00000096323	NO
B Cell	ENSGALG00000047113	ENSGALT00000093626	NO
B Cell	ENSGALG00000047113	ENSGALT00000102373	NO
B Cell	ENSGALG00000054601	ENSGALT00000091953	NO
B Cell	ENSGALG00000054601	ENSGALT00000107809	NO
B Cell	ENSGALG00000054601	ENSGALT00000105447	NO
B Cell	ENSGALG00000051720	ENSGALT00000094409	NO
B Cell	ENSGALG00000052555	ENSGALT00000106382	NO
B Cell	ENSGALG00000053348	ENSGALT00000102284	NO
B Cell	ENSGALG00000050234	ENSGALT00000090620	NO
B Cell	ENSGALG00000048836	ENSGALT00000091285	NO
B Cell	ENSGALG00000048836	ENSGALT00000100442	NO
B Cell	ENSGALG00000048595	ENSGALT00000107170	NO
B Cell	ENSGALG00000048595	ENSGALT00000102547	YES
B Cell	ENSGALG00000048335	ENSGALT00000101596	NO
B Cell	107053917	XR_001467707	NO
B Cell	ENSGALG00000049017	ENSGALT00000096479	NO
B Cell	ENSGALG00000049017	ENSGALT00000105972	NO
B Cell	ENSGALG00000049017	ENSGALT00000104204	NO
B Cell	ENSGALG00000049886	ENSGALT00000104039	NO
B Cell	ENSGALG00000054206	ENSGALT00000090452	NO
B Cell	ENSGALG00000050838	ENSGALT00000096288	NO
B Cell	ENSGALG00000050838	ENSGALT00000099000	NO
B Cell	ENSGALG00000047408	ENSGALT00000103978	NO
B Cell	ENSGALG00000048850	ENSGALT00000101407	NO
B Cell	ENSGALG00000045029	ENSGALT00000083702	NO
B Cell	107054040	XR_001467959	NO
B Cell	ENSGALG00000050092	ENSGALT00000096489	NO
B Cell	ENSGALG00000050092	ENSGALT00000104848	NO
B Cell	ENSGALG00000054726	ENSGALT00000095224	NO
B Cell	ENSGALG00000051896	ENSGALT00000096637	NO
B Cell	107051881	XR_001463848	NO
B Cell	ENSGALG00000051548	ENSGALT00000098409	NO
B Cell	ENSGALG00000051548	ENSGALT00000106960	NO
B Cell	ENSGALG00000051989	ENSGALT00000100380	NO
B Cell	ENSGALG00000050118	ENSGALT00000106269	NO
B Cell	ENSGALG00000020985	ENSGALT00000033720	NO
B Cell	ENSGALG00000050793	ENSGALT00000099823	NO
B Cell	ENSGALG00000050793	ENSGALT00000092529	NO
B Cell	ENSGALG00000051487	ENSGALT00000107822	NO
B Cell	ENSGALG00000052803	ENSGALT00000098010	NO
B Cell	ENSGALG00000024266	ENSGALT00000040970	NO
B Cell	ENSGALG00000049832	ENSGALT00000106698	NO
B Cell	ENSGALG00000036399	ENSGALT00000063346	NO
B Cell	ENSGALG00000034946	ENSGALT00000052717	NO
B Cell	ENSGALG00000053866	ENSGALT00000105400	NO
B Cell	ENSGALG00000053866	ENSGALT00000105393	NO
B Cell	ENSGALG00000043388	ENSGALT00000059953	NO
B Cell	ENSGALG00000053045	ENSGALT00000102562	NO
B Cell	ENSGALG00000054791	ENSGALT00000101682	NO
B Cell	ENSGALG00000052536	ENSGALT00000094615	NO
B Cell	ENSGALG00000052525	ENSGALT00000101541	NO
B Cell	ENSGALG00000052525	ENSGALT00000100743	NO
B Cell	ENSGALG00000052525	ENSGALT00000106542	NO
B Cell	ENSGALG00000048824	ENSGALT00000092578	YES
B Cell	ENSGALG00000051074	ENSGALT00000094082	NO
B Cell	ENSGALG00000050667	ENSGALT00000092785	NO
B Cell	ENSGALG00000048305	ENSGALT00000094765	NO
B Cell	ENSGALG00000054593	ENSGALT00000102470	NO
B Cell	ENSGALG00000054593	ENSGALT00000097966	NO
B Cell	ENSGALG00000047001	ENSGALT00000102301	NO
B Cell	ENSGALG00000047428	ENSGALT00000106337	NO
B Cell	ENSGALG00000050944	ENSGALT00000088870	NO
B Cell	ENSGALG00000043988	ENSGALT00000064701	NO
B Cell	ENSGALG00000041352	ENSGALT00000083982	NO
B Cell	ENSGALG00000041352	ENSGALT00000102353	NO
B Cell	ENSGALG00000048503	ENSGALT00000093244	NO
B Cell	ENSGALG00000043260	ENSGALT00000098654	NO
B Cell	ENSGALG00000046486	ENSGALT00000088093	NO
B Cell	ENSGALG00000046486	ENSGALT00000106085	NO
B Cell	ENSGALG00000054249	ENSGALT00000103817	NO
B Cell	ENSGALG00000049564	ENSGALT00000098953	NO
B Cell	ENSGALG00000049564	ENSGALT00000104079	NO
B Cell	ENSGALG00000052671	ENSGALT00000105941	NO
B Cell	ENSGALG00000052671	ENSGALT00000094229	NO
B Cell	ENSGALG00000049885	ENSGALT00000101365	NO
B Cell	ENSGALG00000049885	ENSGALT00000104110	NO
B Cell	ENSGALG00000053355	ENSGALT00000095419	NO
B Cell	ENSGALG00000053355	ENSGALT00000099123	NO
B Cell	ENSGALG00000054875	ENSGALT00000101940	NO
B Cell	ENSGALG00000048360	ENSGALT00000097591	NO
B Cell	ENSGALG00000051470	ENSGALT00000107642	NO
B Cell	ENSGALG00000037178	ENSGALT00000095583	NO
B Cell	ENSGALG00000051071	ENSGALT00000105162	NO
B Cell	ENSGALG00000042868	ENSGALT00000048436	NO
B Cell	ENSGALG00000053303	ENSGALT00000105648	NO
B Cell	ENSGALG00000042656	ENSGALT00000096016	NO
B Cell	ENSGALG00000046705	ENSGALT00000106537	NO
B Cell	ENSGALG00000050346	ENSGALT00000102601	NO
B Cell	ENSGALG00000031645	ENSGALT00000094886	NO
B Cell	107050368	XR_001462560	NO
B Cell	ENSGALG00000051951	ENSGALT00000098505	NO
B Cell	ENSGALG00000054443	ENSGALT00000107295	NO
B Cell	ENSGALG00000054443	ENSGALT00000097348	NO
B Cell	ENSGALG00000053959	ENSGALT00000102296	NO
B Cell	ENSGALG00000047468	ENSGALT00000092005	NO
B Cell	ENSGALG00000047468	ENSGALT00000097268	NO
B Cell	ENSGALG00000046929	ENSGALT00000098127	NO
B Cell	ENSGALG00000047776	ENSGALT00000094677	NO
B Cell	ENSGALG00000050200	ENSGALT00000091924	NO
B Cell	ENSGALG00000054851	ENSGALT00000095881	NO
B Cell	ENSGALG00000054038	ENSGALT00000101584	NO
B Cell	ENSGALG00000054038	ENSGALT00000102227	NO
B Cell	ENSGALG00000051062	ENSGALT00000107180	NO
B Cell	ENSGALG00000051062	ENSGALT00000096661	NO
B Cell	ENSGALG00000047756	ENSGALT00000101334	NO
B Cell	107051146	XR_001463002	NO
B Cell	ENSGALG00000046749	ENSGALT00000106772	NO
B Cell	ENSGALG00000047090	ENSGALT00000103001	NO
B Cell	ENSGALG00000050053	ENSGALT00000090461	NO
B Cell	107056509	XR_001471030	NO
B Cell	107049290	XR_001461744	NO
B Cell	ENSGALG00000050218	ENSGALT00000101364	NO
B Cell	ENSGALG00000053325	ENSGALT00000097321	NO
B Cell	ENSGALG00000047232	ENSGALT00000094321	NO
B Cell	107051910	XR_001463891	NO
B Cell	ENSGALG00000055065	ENSGALT00000094937	YES
B Cell	ENSGALG00000040221	ENSGALT00000049867	NO
B Cell	ENSGALG00000048029	ENSGALT00000097752	NO
B Cell	ENSGALG00000048029	ENSGALT00000093023	NO
B Cell	ENSGALG00000051662	ENSGALT00000094940	NO
B Cell	ENSGALG00000048150	ENSGALT00000102361	NO
B Cell	ENSGALG00000048150	ENSGALT00000103762	NO
B Cell	ENSGALG00000053562	ENSGALT00000093041	NO
B Cell	ENSGALG00000050012	ENSGALT00000107859	NO
B Cell	ENSGALG00000050012	ENSGALT00000096131	NO
B Cell	ENSGALG00000048068	ENSGALT00000100153	NO
B Cell	ENSGALG00000051419	ENSGALT00000100225	NO
B Cell	ENSGALG00000051419	ENSGALT00000090691	NO
B Cell	ENSGALG00000051419	ENSGALT00000098549	NO
B Cell	107052267	XR_001464656	NO
B Cell	ENSGALG00000046481	ENSGALT00000101857	NO
B Cell	ENSGALG00000046481	ENSGALT00000089334	NO
B Cell	ENSGALG00000046481	ENSGALT00000100970	NO
B Cell	ENSGALG00000054349	ENSGALT00000094294	NO
B Cell	ENSGALG00000046952	ENSGALT00000098878	NO
B Cell	ENSGALG00000052132	ENSGALT00000091463	NO
B Cell	ENSGALG00000048204	ENSGALT00000092880	NO
B Cell	ENSGALG00000045948	ENSGALT00000087277	NO
B Cell	ENSGALG00000046953	ENSGALT00000095231	NO
B Cell	ENSGALG00000054498	ENSGALT00000098291	NO
B Cell	ENSGALG00000054126	ENSGALT00000096795	NO
B Cell	ENSGALG00000054993	ENSGALT00000105107	NO
B Cell	ENSGALG00000051196	ENSGALT00000103389	NO
B Cell	ENSGALG00000046534	ENSGALT00000099834	NO
B Cell	ENSGALG00000053643	ENSGALT00000099381	NO
B Cell	ENSGALG00000045740	ENSGALT00000086251	NO
B Cell	ENSGALG00000050022	ENSGALT00000090395	NO
B Cell	ENSGALG00000047056	ENSGALT00000101143	NO
Bursa	ENSGALG00000052679	ENSGALT00000095864	NO
Bursa	107054287	XR_001469189	NO
Bursa	ENSGALG00000049873	ENSGALT00000094030	NO
Bursa	ENSGALG00000049873	ENSGALT00000101432	NO
Bursa	ENSGALG00000047599	ENSGALT00000104441	NO
Bursa	ENSGALG00000046797	ENSGALT00000104590	NO
Bursa	ENSGALG00000047194	ENSGALT00000103760	NO
Bursa	ENSGALG00000048328	ENSGALT00000098229	NO
Bursa	ENSGALG00000051962	ENSGALT00000106663	NO
Bursa	ENSGALG00000050846	ENSGALT00000100539	NO
Bursa	ENSGALG00000050519	ENSGALT00000106351	NO
Bursa	ENSGALG00000048878	ENSGALT00000103234	NO
Bursa	ENSGALG00000053590	ENSGALT00000103156	NO
Bursa	ENSGALG00000049264	ENSGALT00000098606	NO
Bursa	ENSGALG00000051854	ENSGALT00000099875	NO
Bursa	ENSGALG00000051854	ENSGALT00000098227	NO
Bursa	ENSGALG00000008153	ENSGALT00000013244	NO
Bursa	ENSGALG00000008153	ENSGALT00000103437	NO
Bursa	ENSGALG00000053060	ENSGALT00000097519	NO
Bursa	ENSGALG00000053060	ENSGALT00000097398	NO
Bursa	ENSGALG00000050230	ENSGALT00000098858	NO
Bursa	ENSGALG00000051559	ENSGALT00000101578	NO
Bursa	ENSGALG00000050475	ENSGALT00000105830	NO
Bursa	107054553	XR_001468950	NO
Bursa	ENSGALG00000046927	ENSGALT00000103533	NO
Bursa	ENSGALG00000046927	ENSGALT00000091103	NO
Bursa	ENSGALG00000051968	ENSGALT00000099851	NO
Bursa	ENSGALG00000052110	ENSGALT00000091504	YES
Bursa	ENSGALG00000038546	ENSGALT00000070713	NO
Bursa	ENSGALG00000034533	ENSGALT00000052303	NO
Bursa	ENSGALG00000034533	ENSGALT00000103608	NO
Bursa	ENSGALG00000034533	ENSGALT00000066961	NO
Bursa	ENSGALG00000054277	ENSGALT00000101562	NO
Bursa	ENSGALG00000047845	ENSGALT00000108274	NO
Bursa	ENSGALG00000054568	ENSGALT00000094312	NO
Bursa	ENSGALG00000049506	ENSGALT00000093514	NO
Bursa	ENSGALG00000055074	ENSGALT00000098027	YES
Bursa	ENSGALG00000052261	ENSGALT00000090782	NO
Bursa	ENSGALG00000034552	ENSGALT00000061912	NO
Bursa	ENSGALG00000052884	ENSGALT00000104875	NO
Bursa	ENSGALG00000054172	ENSGALT00000095808	NO
Bursa	ENSGALG00000054172	ENSGALT00000103194	NO
Bursa	ENSGALG00000048831	ENSGALT00000100943	NO
Bursa	ENSGALG00000048831	ENSGALT00000091449	NO
Bursa	ENSGALG00000034631	ENSGALT00000081149	NO
Bursa	ENSGALG00000037666	ENSGALT00000052214	NO
Bursa	ENSGALG00000052912	ENSGALT00000091649	NO
Bursa	ENSGALG00000049545	ENSGALT00000097884	NO
Bursa	ENSGALG00000049545	ENSGALT00000099651	NO
Bursa	107053731	XR_001467267	NO
Bursa	ENSGALG00000048001	ENSGALT00000090854	NO
Bursa	ENSGALG00000048486	ENSGALT00000097794	NO
Bursa	ENSGALG00000049530	ENSGALT00000104690	NO
Bursa	ENSGALG00000048948	ENSGALT00000090771	NO
Bursa	ENSGALG00000048948	ENSGALT00000101433	NO
Bursa	107053437	XR_001466653	NO
Bursa	ENSGALG00000053936	ENSGALT00000094657	NO
Bursa	ENSGALG00000050133	ENSGALT00000098977	NO
Bursa	ENSGALG00000048674	ENSGALT00000092535	NO
Bursa	ENSGALG00000048674	ENSGALT00000105857	NO
Bursa	ENSGALG00000049051	ENSGALT00000104956	NO
Bursa	ENSGALG00000049795	ENSGALT00000096818	NO
Bursa	ENSGALG00000048615	ENSGALT00000100702	NO
Bursa	ENSGALG00000047725	ENSGALT00000096578	NO
Bursa	107054070	XR_001468002	NO
Bursa	ENSGALG00000052475	ENSGALT00000091076	NO
Bursa	ENSGALG00000035970	ENSGALT00000080823	NO
Bursa	ENSGALG00000047503	ENSGALT00000094140	NO
Bursa	ENSGALG00000052222	ENSGALT00000092115	NO
Bursa	ENSGALG00000050957	ENSGALT00000105899	NO
Bursa	ENSGALG00000051518	ENSGALT00000092366	NO
Bursa	ENSGALG00000030195	ENSGALT00000051385	NO
Bursa	101748309	XR_001468570	NO
Bursa	101748309	XR_001468569	NO
Bursa	ENSGALG00000051407	ENSGALT00000097664	YES
Bursa	ENSGALG00000050062	ENSGALT00000099952	NO
Bursa	ENSGALG00000038075	ENSGALT00000075517	NO
Bursa	ENSGALG00000052144	ENSGALT00000104771	NO
Bursa	ENSGALG00000052144	ENSGALT00000101856	NO
Bursa	ENSGALG00000052801	ENSGALT00000094338	NO
Bursa	ENSGALG00000051553	ENSGALT00000090708	NO
Bursa	ENSGALG00000048810	ENSGALT00000100324	NO
Bursa	ENSGALG00000053172	ENSGALT00000096999	NO
Bursa	ENSGALG00000054115	ENSGALT00000106247	NO
Bursa	ENSGALG00000054115	ENSGALT00000094808	NO
Bursa	ENSGALG00000046702	ENSGALT00000092179	NO
Bursa	ENSGALG00000046702	ENSGALT00000092235	NO
Bursa	ENSGALG00000046702	ENSGALT00000106350	NO
Bursa	ENSGALG00000050659	ENSGALT00000104174	NO
Bursa	ENSGALG00000049761	ENSGALT00000101922	NO
Bursa	ENSGALG00000031177	ENSGALT00000052004	NO
Bursa	ENSGALG00000049574	ENSGALT00000107800	NO
Bursa	ENSGALG00000049574	ENSGALT00000091098	NO
Bursa	ENSGALG00000055040	ENSGALT00000097247	NO
Bursa	ENSGALG00000051316	ENSGALT00000094422	NO
Bursa	ENSGALG00000053808	ENSGALT00000107622	NO
Bursa	ENSGALG00000049467	ENSGALT00000100328	NO
Bursa	ENSGALG00000049467	ENSGALT00000094620	NO
Bursa	ENSGALG00000047247	ENSGALT00000100760	NO
Bursa	ENSGALG00000047247	ENSGALT00000106967	NO
Bursa	ENSGALG00000054390	ENSGALT00000099619	NO
Bursa	ENSGALG00000051833	ENSGALT00000095049	NO
Bursa	ENSGALG00000050851	ENSGALT00000107878	NO
Bursa	ENSGALG00000051722	ENSGALT00000105813	NO
Bursa	ENSGALG00000047787	ENSGALT00000091532	NO
Bursa	ENSGALG00000047085	ENSGALT00000091281	NO
Bursa	ENSGALG00000047085	ENSGALT00000102065	NO
Bursa	ENSGALG00000040001	ENSGALT00000101024	NO
Bursa	107055163	XR_001470174	NO
Bursa	107055324	XR_001470380	NO
Bursa	ENSGALG00000050828	ENSGALT00000096758	NO
Bursa	ENSGALG00000049249	ENSGALT00000092523	NO
Bursa	ENSGALG00000051565	ENSGALT00000094142	YES
Bursa	ENSGALG00000051565	ENSGALT00000107085	YES
Bursa	ENSGALG00000052898	ENSGALT00000064693	YES
Bursa	ENSGALG00000042372	ENSGALT00000052095	YES
Bursa	ENSGALG00000054341	ENSGALT00000101482	YES
Bursa	ENSGALG00000051887	ENSGALT00000095928	NO
Bursa	ENSGALG00000051887	ENSGALT00000106982	NO
Bursa	ENSGALG00000050699	ENSGALT00000100968	NO
Bursa	ENSGALG00000046871	ENSGALT00000097124	YES
Bursa	107057081	XR_001471294	NO
Bursa	ENSGALG00000034279	ENSGALT00000104683	YES
Bursa	ENSGALG00000047504	ENSGALT00000094458	YES
Bursa	ENSGALG00000051691	ENSGALT00000101744	NO
Bursa	107055849	XR_001470708	YES
Bursa	ENSGALG00000052851	ENSGALT00000100320	NO
Bursa	ENSGALG00000033758	ENSGALT00000074948	NO
Bursa	ENSGALG00000050891	ENSGALT00000098564	NO
Bursa	107049667	XR_001462009	NO
Bursa	ENSGALG00000050849	ENSGALT00000096338	NO
Bursa	ENSGALG00000035904	ENSGALT00000108360	NO
Bursa	ENSGALG00000049070	ENSGALT00000092365	NO
Bursa	ENSGALG00000047734	ENSGALT00000102352	NO
Bursa	ENSGALG00000052885	ENSGALT00000091204	NO
Bursa	ENSGALG00000049965	ENSGALT00000100228	NO
Bursa	ENSGALG00000049965	ENSGALT00000096217	NO
Bursa	ENSGALG00000040680	ENSGALT00000046583	NO
Bursa	ENSGALG00000049680	ENSGALT00000096378	NO
Bursa	ENSGALG00000052501	ENSGALT00000107890	NO
Bursa	ENSGALG00000051908	ENSGALT00000099286	NO
Bursa	ENSGALG00000055129	ENSGALT00000100491	NO
Bursa	ENSGALG00000048953	ENSGALT00000106488	NO
Bursa	ENSGALG00000047958	ENSGALT00000094488	NO
Bursa	107051979	XR_001464004	NO
Bursa	ENSGALG00000050382	ENSGALT00000093432	NO
Bursa	ENSGALG00000054405	ENSGALT00000098509	NO
Bursa	ENSGALG00000051928	ENSGALT00000103556	NO
Bursa	ENSGALG00000048763	ENSGALT00000101259	NO
Bursa	ENSGALG00000053134	ENSGALT00000098338	NO
Bursa	ENSGALG00000050273	ENSGALT00000090474	NO
Bursa	ENSGALG00000052226	ENSGALT00000092151	NO
Bursa	ENSGALG00000052226	ENSGALT00000093265	NO
Bursa	ENSGALG00000050514	ENSGALT00000108260	NO
Bursa	ENSGALG00000050758	ENSGALT00000098706	NO
Bursa	107052036	XR_001464145	NO
Bursa	ENSGALG00000047374	ENSGALT00000105902	NO
Bursa	ENSGALG00000053592	ENSGALT00000104547	NO
Bursa	ENSGALG00000054025	ENSGALT00000092282	NO
Bursa	ENSGALG00000051838	ENSGALT00000096571	NO
Bursa	ENSGALG00000053206	ENSGALT00000105942	NO
Bursa	ENSGALG00000053138	ENSGALT00000105122	NO
Bursa	ENSGALG00000050423	ENSGALT00000101684	NO
Bursa	ENSGALG00000050566	ENSGALT00000092238	NO
Bursa	ENSGALG00000052116	ENSGALT00000105827	YES
Bursa	ENSGALG00000053714	ENSGALT00000094863	YES
Bursa	ENSGALG00000053714	ENSGALT00000099734	YES
Bursa	ENSGALG00000053786	ENSGALT00000103525	YES
Bursa	ENSGALG00000053786	ENSGALT00000096222	YES
Bursa	ENSGALG00000052181	ENSGALT00000099267	NO
Bursa	ENSGALG00000047778	ENSGALT00000091743	NO
Bursa	ENSGALG00000050093	ENSGALT00000094360	NO
Bursa	ENSGALG00000052390	ENSGALT00000101528	NO
Bursa	ENSGALG00000049424	ENSGALT00000101000	NO
Bursa	ENSGALG00000047905	ENSGALT00000102436	NO
Bursa	ENSGALG00000049510	ENSGALT00000105412	NO
Bursa	ENSGALG00000047538	ENSGALT00000090649	NO
Bursa	ENSGALG00000002102	ENSGALT00000003281	NO
Bursa	ENSGALG00000002102	ENSGALT00000106683	NO
Bursa	ENSGALG00000039656	ENSGALT00000066716	NO
Bursa	107052155	XR_001464384	NO
Bursa	ENSGALG00000049128	ENSGALT00000090991	NO
Bursa	101747496	XR_212835	NO
Bursa	107052133	XR_001464355	NO
Bursa	107052132	XR_001464354	NO
Bursa	ENSGALG00000034549	ENSGALT00000104818	NO
Bursa	ENSGALG00000051344	ENSGALT00000097521	NO
Bursa	ENSGALG00000046784	ENSGALT00000095825	NO
Bursa	107054193	XR_001468217	NO
Bursa	ENSGALG00000048128	ENSGALT00000094948	NO
Bursa	ENSGALG00000034021	ENSGALT00000099955	NO
Bursa	ENSGALG00000034021	ENSGALT00000091307	NO
Bursa	ENSGALG00000034021	ENSGALT00000056082	NO
Bursa	ENSGALG00000050543	ENSGALT00000101620	NO
Bursa	ENSGALG00000029565	ENSGALT00000101951	NO
Bursa	ENSGALG00000029565	ENSGALT00000051741	NO
Bursa	ENSGALG00000029565	ENSGALT00000047445	NO
Bursa	ENSGALG00000047530	ENSGALT00000093431	YES
Bursa	ENSGALG00000053458	ENSGALT00000101473	NO
Bursa	107054203	XR_001468247	NO
Bursa	ENSGALG00000046938	ENSGALT00000107027	NO
Bursa	ENSGALG00000046938	ENSGALT00000106933	NO
Bursa	ENSGALG00000049524	ENSGALT00000090554	NO
Bursa	ENSGALG00000049524	ENSGALT00000105502	NO
Bursa	ENSGALG00000049524	ENSGALT00000097001	NO
Bursa	ENSGALG00000050101	ENSGALT00000102736	NO
Bursa	ENSGALG00000030510	ENSGALT00000066368	NO
Bursa	ENSGALG00000050885	ENSGALT00000090523	NO
Bursa	ENSGALG00000050933	ENSGALT00000100307	NO
Bursa	107054243	XR_001468313	NO
Bursa	ENSGALG00000047399	ENSGALT00000101126	NO
Bursa	ENSGALG00000047399	ENSGALT00000103798	NO
Bursa	ENSGALG00000047399	ENSGALT00000090808	NO
Bursa	ENSGALG00000047206	ENSGALT00000092963	NO
Bursa	ENSGALG00000047817	ENSGALT00000097311	NO
Bursa	ENSGALG00000042165	ENSGALT00000106411	NO
Bursa	ENSGALG00000053092	ENSGALT00000102331	NO
Bursa	107056822	XR_001471177	NO
Bursa	ENSGALG00000029858	ENSGALT00000064818	NO
Bursa	ENSGALG00000049262	ENSGALT00000098974	NO
Bursa	ENSGALG00000053471	ENSGALT00000093034	NO
Bursa	ENSGALG00000053471	ENSGALT00000105989	NO
Bursa	ENSGALG00000052008	ENSGALT00000092066	NO
Bursa	107054284	XR_001468414	NO
Bursa	ENSGALG00000047292	ENSGALT00000106238	NO
Bursa	ENSGALG00000030532	ENSGALT00000064855	YES
Bursa	ENSGALG00000054527	ENSGALT00000096461	NO
Bursa	ENSGALG00000052771	ENSGALT00000092476	NO
Bursa	ENSGALG00000053385	ENSGALT00000093487	NO
Bursa	ENSGALG00000053098	ENSGALT00000100828	NO
Bursa	ENSGALG00000051793	ENSGALT00000093979	YES
Bursa	ENSGALG00000051775	ENSGALT00000092912	NO
Bursa	ENSGALG00000048397	ENSGALT00000104268	NO
Bursa	107054327	XR_001468512	NO
Bursa	ENSGALG00000042565	ENSGALT00000066243	NO
Bursa	ENSGALG00000054901	ENSGALT00000101895	NO
Bursa	ENSGALG00000049187	ENSGALT00000103116	NO
Bursa	ENSGALG00000052642	ENSGALT00000107846	NO
Bursa	ENSGALG00000052642	ENSGALT00000104287	NO
Bursa	ENSGALG00000049880	ENSGALT00000097079	NO
Bursa	ENSGALG00000047136	ENSGALT00000096580	NO
Bursa	ENSGALG00000051291	ENSGALT00000101073	NO
Bursa	ENSGALG00000041511	ENSGALT00000091992	NO
Bursa	ENSGALG00000047907	ENSGALT00000098389	NO
Bursa	ENSGALG00000048780	ENSGALT00000097260	NO
Bursa	ENSGALG00000050353	ENSGALT00000101771	NO
Bursa	ENSGALG00000048428	ENSGALT00000096465	NO
Bursa	ENSGALG00000046005	ENSGALT00000089280	NO
Bursa	ENSGALG00000051069	ENSGALT00000104180	NO
Bursa	ENSGALG00000053787	ENSGALT00000099135	NO
Bursa	ENSGALG00000052896	ENSGALT00000095831	NO
Bursa	ENSGALG00000051491	ENSGALT00000093454	NO
Bursa	ENSGALG00000051491	ENSGALT00000099519	NO
Bursa	ENSGALG00000046734	ENSGALT00000085329	NO
Bursa	ENSGALG00000029396	ENSGALT00000052482	NO
Bursa	ENSGALG00000029396	ENSGALT00000099011	NO
Bursa	ENSGALG00000054314	ENSGALT00000091262	NO
Bursa	ENSGALG00000029680	ENSGALT00000103166	NO
Bursa	ENSGALG00000029680	ENSGALT00000064093	NO
Bursa	ENSGALG00000048408	ENSGALT00000103911	NO
Bursa	ENSGALG00000050159	ENSGALT00000105347	NO
Bursa	ENSGALG00000051867	ENSGALT00000092328	NO
Bursa	ENSGALG00000051433	ENSGALT00000093844	NO
Bursa	ENSGALG00000051433	ENSGALT00000102363	NO
Bursa	ENSGALG00000054840	ENSGALT00000099596	YES
Bursa	ENSGALG00000054840	ENSGALT00000094618	NO
Bursa	ENSGALG00000051457	ENSGALT00000096408	NO
Bursa	ENSGALG00000035048	ENSGALT00000055691	NO
Bursa	ENSGALG00000041405	ENSGALT00000062284	NO
Bursa	ENSGALG00000054011	ENSGALT00000094915	NO
Bursa	ENSGALG00000051558	ENSGALT00000092133	NO
Bursa	ENSGALG00000048336	ENSGALT00000091763	YES
Bursa	ENSGALG00000037071	ENSGALT00000091657	NO
Bursa	ENSGALG00000052610	ENSGALT00000090700	NO
Bursa	ENSGALG00000049166	ENSGALT00000095020	NO
Bursa	ENSGALG00000053606	ENSGALT00000104484	NO
Bursa	ENSGALG00000053606	ENSGALT00000091284	NO
Bursa	ENSGALG00000041901	ENSGALT00000103763	NO
Bursa	ENSGALG00000047616	ENSGALT00000095282	NO
Bursa	ENSGALG00000052987	ENSGALT00000107127	NO
Bursa	ENSGALG00000054890	ENSGALT00000096004	NO
Bursa	ENSGALG00000034357	ENSGALT00000053559	NO
Bursa	ENSGALG00000049111	ENSGALT00000094306	NO
Bursa	ENSGALG00000042782	ENSGALT00000072561	NO
Bursa	101749196	XR_001468777	NO
Bursa	ENSGALG00000052377	ENSGALT00000091000	NO
Bursa	ENSGALG00000050993	ENSGALT00000099064	NO
Bursa	107054502	XR_001468816	NO
Bursa	ENSGALG00000052972	ENSGALT00000104006	NO
Bursa	107054510	XR_001468837	NO
Bursa	ENSGALG00000033332	ENSGALT00000064624	NO
Bursa	ENSGALG00000051396	ENSGALT00000093866	NO
Bursa	ENSGALG00000033148	ENSGALT00000099424	NO
Bursa	ENSGALG00000033148	ENSGALT00000047640	NO
Bursa	107054534	XR_001468886	NO
Bursa	ENSGALG00000047174	ENSGALT00000107573	NO
Bursa	ENSGALG00000049701	ENSGALT00000092271	NO
Bursa	ENSGALG00000047020	ENSGALT00000100281	NO
Bursa	ENSGALG00000051104	ENSGALT00000105541	NO
Bursa	107054559	XR_001468940	NO
Bursa	ENSGALG00000041847	ENSGALT00000099342	NO
Bursa	ENSGALG00000042587	ENSGALT00000069547	NO
Bursa	ENSGALG00000042338	ENSGALT00000052485	YES
Bursa	ENSGALG00000042338	ENSGALT00000101337	YES
Bursa	ENSGALG00000048631	ENSGALT00000098012	NO
Bursa	ENSGALG00000047303	ENSGALT00000098746	NO
Bursa	ENSGALG00000047303	ENSGALT00000092601	NO
Bursa	ENSGALG00000052221	ENSGALT00000093687	NO
Bursa	ENSGALG00000049252	ENSGALT00000099046	NO
Bursa	ENSGALG00000052735	ENSGALT00000097986	NO
Bursa	ENSGALG00000054141	ENSGALT00000092492	NO
Bursa	ENSGALG00000030678	ENSGALT00000061053	NO
Bursa	ENSGALG00000050024	ENSGALT00000092489	YES
Bursa	ENSGALG00000053454	ENSGALT00000107802	NO
Bursa	ENSGALG00000052117	ENSGALT00000092918	NO
Bursa	ENSGALG00000047137	ENSGALT00000100727	NO
Bursa	ENSGALG00000054962	ENSGALT00000099502	NO
Bursa	ENSGALG00000049485	ENSGALT00000092558	NO
Bursa	ENSGALG00000052890	ENSGALT00000101351	YES
Bursa	ENSGALG00000047636	ENSGALT00000107394	NO
Bursa	ENSGALG00000047636	ENSGALT00000106965	NO
Bursa	ENSGALG00000047636	ENSGALT00000092976	NO
Bursa	107054605	XR_001469037	NO
Bursa	ENSGALG00000053400	ENSGALT00000106014	NO
Bursa	ENSGALG00000053376	ENSGALT00000107094	NO
Bursa	ENSGALG00000047690	ENSGALT00000103286	NO
Bursa	107054614	XR_001469072	NO
Bursa	ENSGALG00000053513	ENSGALT00000096828	NO
Bursa	ENSGALG00000049123	ENSGALT00000104925	NO
Bursa	ENSGALG00000049123	ENSGALT00000097662	NO
Bursa	ENSGALG00000037400	ENSGALT00000079589	NO
Bursa	ENSGALG00000037400	ENSGALT00000053231	NO
Bursa	ENSGALG00000049699	ENSGALT00000103212	NO
Bursa	ENSGALG00000049699	ENSGALT00000095695	NO
Bursa	ENSGALG00000049699	ENSGALT00000107026	NO
Bursa	ENSGALG00000053581	ENSGALT00000104660	YES
Bursa	ENSGALG00000053581	ENSGALT00000098512	YES
Bursa	ENSGALG00000053581	ENSGALT00000100936	YES
Bursa	107057040	XR_001471266	NO
Bursa	107054629	XR_001469100	NO
Bursa	ENSGALG00000047046	ENSGALT00000101576	NO
Bursa	ENSGALG00000050448	ENSGALT00000104404	NO
Bursa	ENSGALG00000053859	ENSGALT00000100710	NO
Bursa	107057024	XR_001471260	NO
Bursa	107057024	XR_001471261	NO
Bursa	ENSGALG00000050337	ENSGALT00000098421	NO
Bursa	ENSGALG00000051216	ENSGALT00000101760	NO
Bursa	ENSGALG00000053287	ENSGALT00000105208	NO
Bursa	ENSGALG00000047895	ENSGALT00000096469	NO
Bursa	ENSGALG00000047895	ENSGALT00000104800	NO
Bursa	ENSGALG00000052567	ENSGALT00000106843	NO
Bursa	ENSGALG00000052567	ENSGALT00000098442	NO
Bursa	ENSGALG00000052567	ENSGALT00000099436	NO
Bursa	ENSGALG00000051744	ENSGALT00000097704	NO
Bursa	ENSGALG00000051744	ENSGALT00000095056	NO
Bursa	ENSGALG00000048316	ENSGALT00000102823	NO
Bursa	ENSGALG00000048316	ENSGALT00000105694	NO
Bursa	ENSGALG00000050502	ENSGALT00000091362	NO
Bursa	ENSGALG00000050540	ENSGALT00000101687	NO
Bursa	ENSGALG00000051282	ENSGALT00000094254	NO
Bursa	107051604	XR_001463267	NO
Bursa	ENSGALG00000054222	ENSGALT00000097841	NO
Bursa	ENSGALG00000054222	ENSGALT00000067745	NO
Bursa	ENSGALG00000049855	ENSGALT00000095771	NO
Bursa	ENSGALG00000021405	ENSGALT00000103465	NO
Bursa	ENSGALG00000021405	ENSGALT00000034549	NO
Bursa	ENSGALG00000052765	ENSGALT00000091107	NO
Bursa	ENSGALG00000030684	ENSGALT00000061789	NO
Bursa	101749087	XR_210161	NO
Bursa	ENSGALG00000046820	ENSGALT00000104222	NO
Bursa	ENSGALG00000049331	ENSGALT00000106894	NO
Bursa	107054683	XR_001469192	NO
Bursa	ENSGALG00000048627	ENSGALT00000104028	NO
Bursa	ENSGALG00000048627	ENSGALT00000095853	NO
Bursa	ENSGALG00000048627	ENSGALT00000107462	NO
Bursa	107050912	XR_001462851	NO
Bursa	107050912	XR_001462850	NO
Bursa	ENSGALG00000037980	ENSGALT00000073934	NO
Bursa	ENSGALG00000048928	ENSGALT00000106116	NO
Bursa	ENSGALG00000048928	ENSGALT00000096334	NO
Bursa	107055593	XR_001470596	NO
Bursa	ENSGALG00000048880	ENSGALT00000097213	NO
Bursa	ENSGALG00000048374	ENSGALT00000095373	NO
Bursa	ENSGALG00000053394	ENSGALT00000091056	NO
Bursa	ENSGALG00000053394	ENSGALT00000097215	NO
Bursa	ENSGALG00000052838	ENSGALT00000093606	NO
Bursa	ENSGALG00000048322	ENSGALT00000101652	NO
Bursa	ENSGALG00000048322	ENSGALT00000091805	NO
Bursa	ENSGALG00000052058	ENSGALT00000107962	NO
Bursa	ENSGALG00000040536	ENSGALT00000080388	NO
Bursa	ENSGALG00000037079	ENSGALT00000065208	NO
Bursa	ENSGALG00000051496	ENSGALT00000096428	NO
Bursa	107052197	XR_001464490	NO
Bursa	107052198	XR_001464491	NO
Bursa	ENSGALG00000035624	ENSGALT00000065091	NO
Bursa	ENSGALG00000050839	ENSGALT00000097959	NO
Bursa	ENSGALG00000030592	ENSGALT00000048738	NO
Bursa	ENSGALG00000053940	ENSGALT00000105894	NO
Bursa	ENSGALG00000046322	ENSGALT00000101318	NO
Bursa	ENSGALG00000046322	ENSGALT00000087613	NO
Bursa	ENSGALG00000054409	ENSGALT00000094017	NO
Bursa	107052170	XR_001464448	NO
Bursa	ENSGALG00000049386	ENSGALT00000094811	NO
Bursa	ENSGALG00000050980	ENSGALT00000098255	NO
Bursa	ENSGALG00000052727	ENSGALT00000105841	NO
Bursa	ENSGALG00000048243	ENSGALT00000094363	NO
Bursa	ENSGALG00000049195	ENSGALT00000098160	NO
Bursa	ENSGALG00000049195	ENSGALT00000106249	NO
Bursa	ENSGALG00000049195	ENSGALT00000103321	NO
Bursa	ENSGALG00000054039	ENSGALT00000093550	NO
Bursa	ENSGALG00000050116	ENSGALT00000106804	NO
Bursa	ENSGALG00000041778	ENSGALT00000103940	NO
Bursa	ENSGALG00000041778	ENSGALT00000105257	NO
Bursa	ENSGALG00000041778	ENSGALT00000074623	NO
Bursa	ENSGALG00000038873	ENSGALT00000081876	NO
Bursa	107052238	XR_001464588	NO
Bursa	ENSGALG00000051036	ENSGALT00000106134	NO
Bursa	ENSGALG00000036788	ENSGALT00000105454	NO
Bursa	ENSGALG00000036788	ENSGALT00000075148	NO
Bursa	ENSGALG00000029249	ENSGALT00000070815	NO
Bursa	ENSGALG00000029249	ENSGALT00000058819	NO
Bursa	ENSGALG00000033297	ENSGALT00000093821	YES
Bursa	ENSGALG00000054794	ENSGALT00000101171	YES
Bursa	ENSGALG00000048760	ENSGALT00000105071	NO
Bursa	ENSGALG00000037717	ENSGALT00000104731	NO
Bursa	ENSGALG00000037717	ENSGALT00000057004	YES
Bursa	ENSGALG00000041693	ENSGALT00000076697	NO
Bursa	ENSGALG00000041693	ENSGALT00000056997	NO
Bursa	ENSGALG00000038575	ENSGALT00000076521	NO
Bursa	ENSGALG00000054738	ENSGALT00000075811	NO
Bursa	ENSGALG00000019795	ENSGALT00000031441	NO
Bursa	ENSGALG00000049406	ENSGALT00000103245	NO
Bursa	107054753	XR_001469352	NO
Bursa	107054753	XR_001469351	NO
Bursa	107054750	XR_001469344	NO
Bursa	107054751	XR_001469345	NO
Bursa	ENSGALG00000048413	ENSGALT00000101284	NO
Bursa	ENSGALG00000047339	ENSGALT00000100116	NO
Bursa	ENSGALG00000048232	ENSGALT00000103606	NO
Bursa	ENSGALG00000052090	ENSGALT00000092061	YES
Bursa	ENSGALG00000047455	ENSGALT00000104352	NO
Bursa	107054784	XR_001469422	NO
Bursa	ENSGALG00000032816	ENSGALT00000059644	NO
Bursa	ENSGALG00000051352	ENSGALT00000092850	NO
Bursa	ENSGALG00000048274	ENSGALT00000090419	NO
Bursa	ENSGALG00000030792	ENSGALT00000080413	NO
Bursa	ENSGALG00000001885	ENSGALT00000002921	NO
Bursa	ENSGALG00000054047	ENSGALT00000104737	NO
Bursa	ENSGALG00000053249	ENSGALT00000102167	NO
Bursa	ENSGALG00000053249	ENSGALT00000093865	NO
Bursa	ENSGALG00000054757	ENSGALT00000102817	NO
Bursa	ENSGALG00000040065	ENSGALT00000059203	NO
Bursa	ENSGALG00000035464	ENSGALT00000066877	NO
Bursa	ENSGALG00000047735	ENSGALT00000093146	NO
Bursa	107054807	XR_001469468	NO
Bursa	107054809	XR_001469472	NO
Bursa	ENSGALG00000041948	ENSGALT00000058831	NO
Bursa	ENSGALG00000030982	ENSGALT00000062533	NO
Bursa	ENSGALG00000050465	ENSGALT00000096689	NO
Bursa	107052488	XR_001464985	NO
Bursa	ENSGALG00000053469	ENSGALT00000105954	NO
Bursa	ENSGALG00000050097	ENSGALT00000107452	NO
Bursa	ENSGALG00000050097	ENSGALT00000108120	NO
Bursa	ENSGALG00000054055	ENSGALT00000097203	NO
Bursa	ENSGALG00000047674	ENSGALT00000102050	NO
Bursa	ENSGALG00000047674	ENSGALT00000098522	NO
Bursa	ENSGALG00000052184	ENSGALT00000098572	NO
Bursa	ENSGALG00000052184	ENSGALT00000094102	NO
Bursa	ENSGALG00000049129	ENSGALT00000099218	NO
Bursa	ENSGALG00000047326	ENSGALT00000096212	NO
Bursa	107052592	XR_001465181	NO
Bursa	ENSGALG00000053613	ENSGALT00000092845	NO
Bursa	ENSGALG00000051600	ENSGALT00000095512	NO
Bursa	ENSGALG00000051600	ENSGALT00000106137	NO
Bursa	ENSGALG00000049482	ENSGALT00000096362	NO
Bursa	ENSGALG00000050087	ENSGALT00000101408	NO
Bursa	107052572	XR_001465153	NO
Bursa	ENSGALG00000048032	ENSGALT00000095372	NO
Bursa	ENSGALG00000049403	ENSGALT00000108143	NO
Bursa	ENSGALG00000049804	ENSGALT00000093195	NO
Bursa	ENSGALG00000050340	ENSGALT00000096884	NO
Bursa	ENSGALG00000051353	ENSGALT00000095542	NO
Bursa	ENSGALG00000048952	ENSGALT00000107181	NO
Bursa	101747260	XR_211570	NO
Bursa	ENSGALG00000047686	ENSGALT00000093717	NO
Bursa	ENSGALG00000049493	ENSGALT00000106697	NO
Bursa	ENSGALG00000053190	ENSGALT00000094158	NO
Bursa	ENSGALG00000049978	ENSGALT00000101268	NO
Bursa	ENSGALG00000049904	ENSGALT00000107304	NO
Bursa	ENSGALG00000036148	ENSGALT00000065942	NO
Bursa	107056001	XR_001470795	YES
Bursa	ENSGALG00000054423	ENSGALT00000105986	NO
Bursa	ENSGALG00000048965	ENSGALT00000103110	NO
Bursa	ENSGALG00000049683	ENSGALT00000099790	NO
Bursa	ENSGALG00000053738	ENSGALT00000095329	NO
Bursa	ENSGALG00000053738	ENSGALT00000097414	NO
Bursa	ENSGALG00000030111	ENSGALT00000059036	NO
Bursa	101750048	XR_211616	NO
Bursa	107052616	XR_001465216	YES
Bursa	ENSGALG00000050651	ENSGALT00000098483	NO
Bursa	ENSGALG00000052677	ENSGALT00000104907	YES
Bursa	ENSGALG00000049242	ENSGALT00000094838	NO
Bursa	ENSGALG00000048667	ENSGALT00000098222	NO
Bursa	ENSGALG00000048667	ENSGALT00000106569	NO
Bursa	ENSGALG00000048490	ENSGALT00000107840	NO
Bursa	ENSGALG00000052383	ENSGALT00000092818	NO
Bursa	ENSGALG00000047333	ENSGALT00000102638	NO
Bursa	ENSGALG00000019568	ENSGALT00000031045	NO
Bursa	ENSGALG00000019568	ENSGALT00000100854	NO
Bursa	ENSGALG00000047910	ENSGALT00000105132	NO
Bursa	ENSGALG00000054353	ENSGALT00000102086	NO
Bursa	ENSGALG00000054353	ENSGALT00000092740	NO
Bursa	ENSGALG00000048066	ENSGALT00000098550	YES
Bursa	ENSGALG00000051619	ENSGALT00000106266	NO
Bursa	ENSGALG00000053827	ENSGALT00000095063	NO
Bursa	ENSGALG00000049228	ENSGALT00000093530	NO
Bursa	ENSGALG00000049889	ENSGALT00000101080	NO
Bursa	ENSGALG00000052392	ENSGALT00000099606	NO
Bursa	ENSGALG00000052392	ENSGALT00000103209	NO
Bursa	ENSGALG00000050367	ENSGALT00000095696	NO
Bursa	ENSGALG00000050709	ENSGALT00000100860	NO
Bursa	ENSGALG00000047657	ENSGALT00000100300	NO
Bursa	ENSGALG00000053485	ENSGALT00000104866	NO
Bursa	ENSGALG00000032841	ENSGALT00000065465	NO
Bursa	ENSGALG00000036292	ENSGALT00000077144	NO
Bursa	ENSGALG00000040227	ENSGALT00000083111	NO
Bursa	ENSGALG00000046819	ENSGALT00000107738	YES
Bursa	107052697	XR_001465350	NO
Bursa	ENSGALG00000053290	ENSGALT00000093046	NO
Bursa	ENSGALG00000054853	ENSGALT00000105616	NO
Bursa	ENSGALG00000054453	ENSGALT00000093679	NO
Bursa	ENSGALG00000050498	ENSGALT00000094608	NO
Bursa	ENSGALG00000029474	ENSGALT00000075249	NO
Bursa	ENSGALG00000054929	ENSGALT00000101260	NO
Bursa	ENSGALG00000050073	ENSGALT00000100421	NO
Bursa	ENSGALG00000049819	ENSGALT00000093852	NO
Bursa	ENSGALG00000054431	ENSGALT00000107924	NO
Bursa	ENSGALG00000038580	ENSGALT00000080876	NO
Bursa	ENSGALG00000046879	ENSGALT00000099807	NO
Bursa	ENSGALG00000046879	ENSGALT00000094734	NO
Bursa	ENSGALG00000050729	ENSGALT00000107229	NO
Bursa	ENSGALG00000047188	ENSGALT00000097331	NO
Bursa	ENSGALG00000050232	ENSGALT00000091191	NO
Bursa	ENSGALG00000051109	ENSGALT00000102636	NO
Bursa	ENSGALG00000049656	ENSGALT00000099667	NO
Bursa	ENSGALG00000048571	ENSGALT00000098047	NO
Bursa	ENSGALG00000052069	ENSGALT00000098998	NO
Bursa	ENSGALG00000052069	ENSGALT00000099333	NO
Bursa	ENSGALG00000052069	ENSGALT00000090725	NO
Bursa	ENSGALG00000048571	ENSGALT00000090953	NO
Bursa	ENSGALG00000048571	ENSGALT00000092096	NO
Bursa	ENSGALG00000052841	ENSGALT00000104451	NO
Bursa	ENSGALG00000050927	ENSGALT00000099730	NO
Bursa	ENSGALG00000051414	ENSGALT00000107342	NO
Bursa	ENSGALG00000033453	ENSGALT00000071481	NO
Bursa	ENSGALG00000047548	ENSGALT00000102139	NO
Bursa	ENSGALG00000047850	ENSGALT00000104123	NO
Bursa	ENSGALG00000055045	ENSGALT00000094089	NO
Bursa	ENSGALG00000055045	ENSGALT00000103833	NO
Bursa	ENSGALG00000048664	ENSGALT00000105664	NO
Bursa	ENSGALG00000052658	ENSGALT00000094905	NO
Bursa	ENSGALG00000049289	ENSGALT00000092458	NO
Bursa	ENSGALG00000049289	ENSGALT00000104289	NO
Bursa	ENSGALG00000051138	ENSGALT00000103570	NO
Bursa	ENSGALG00000036635	ENSGALT00000049927	NO
Bursa	ENSGALG00000036635	ENSGALT00000104203	NO
Bursa	ENSGALG00000051634	ENSGALT00000093154	NO
Bursa	ENSGALG00000051634	ENSGALT00000101603	NO
Bursa	ENSGALG00000036635	ENSGALT00000099575	NO
Bursa	ENSGALG00000032552	ENSGALT00000060731	NO
Bursa	ENSGALG00000029930	ENSGALT00000106163	NO
Bursa	ENSGALG00000051810	ENSGALT00000096350	NO
Bursa	ENSGALG00000051810	ENSGALT00000094483	NO
Bursa	107054890	XR_001469697	NO
Bursa	ENSGALG00000037393	ENSGALT00000057001	YES
Bursa	107054884	XR_001469681	NO
Bursa	ENSGALG00000038484	ENSGALT00000080339	NO
Bursa	ENSGALG00000054208	ENSGALT00000099986	NO
Bursa	ENSGALG00000042613	ENSGALT00000064020	NO
Bursa	107054874	XR_001469659	NO
Bursa	ENSGALG00000047078	ENSGALT00000098994	NO
Bursa	ENSGALG00000035383	ENSGALT00000076813	NO
Bursa	ENSGALG00000037111	ENSGALT00000079662	NO
Bursa	ENSGALG00000034498	ENSGALT00000101848	NO
Bursa	101750846	XR_001469626	NO
Bursa	ENSGALG00000040130	ENSGALT00000069012	NO
Bursa	ENSGALG00000052659	ENSGALT00000102031	NO
Bursa	ENSGALG00000051842	ENSGALT00000094436	NO
Bursa	ENSGALG00000053536	ENSGALT00000093617	NO
Bursa	ENSGALG00000053536	ENSGALT00000092311	YES
Bursa	ENSGALG00000054116	ENSGALT00000105044	NO
Bursa	ENSGALG00000048386	ENSGALT00000099873	YES
Bursa	ENSGALG00000052094	ENSGALT00000098140	NO
Bursa	ENSGALG00000054528	ENSGALT00000092663	NO
Bursa	ENSGALG00000030165	ENSGALT00000075923	NO
Bursa	ENSGALG00000051448	ENSGALT00000092504	NO
Bursa	ENSGALG00000052083	ENSGALT00000091515	NO
Bursa	ENSGALG00000055086	ENSGALT00000106417	NO
Bursa	107054926	XR_001469788	NO
Bursa	ENSGALG00000052384	ENSGALT00000097861	NO
Bursa	ENSGALG00000001935	ENSGALT00000002990	NO
Bursa	ENSGALG00000052112	ENSGALT00000099062	NO
Bursa	ENSGALG00000051379	ENSGALT00000103208	NO
Bursa	ENSGALG00000033093	ENSGALT00000066122	NO
Bursa	ENSGALG00000044688	ENSGALT00000087952	NO
Bursa	ENSGALG00000047991	ENSGALT00000101119	NO
Bursa	ENSGALG00000047991	ENSGALT00000092762	NO
Bursa	ENSGALG00000054225	ENSGALT00000098083	NO
Bursa	ENSGALG00000035976	ENSGALT00000072846	NO
Bursa	ENSGALG00000051674	ENSGALT00000098268	NO
Bursa	ENSGALG00000051674	ENSGALT00000104728	NO
Bursa	107054953	XR_001469837	NO
Bursa	ENSGALG00000047453	ENSGALT00000103097	NO
Bursa	ENSGALG00000047453	ENSGALT00000102153	NO
Bursa	107054976	XR_001469869	NO
Bursa	ENSGALG00000039864	ENSGALT00000076111	NO
Bursa	ENSGALG00000047157	ENSGALT00000093024	NO
Bursa	ENSGALG00000052519	ENSGALT00000103643	NO
Bursa	ENSGALG00000049768	ENSGALT00000095485	NO
Bursa	ENSGALG00000052619	ENSGALT00000104787	NO
Bursa	ENSGALG00000048271	ENSGALT00000091939	NO
Bursa	ENSGALG00000048271	ENSGALT00000092291	NO
Bursa	ENSGALG00000049015	ENSGALT00000101941	NO
Bursa	ENSGALG00000049015	ENSGALT00000100638	NO
Bursa	ENSGALG00000049015	ENSGALT00000096759	NO
Bursa	ENSGALG00000048507	ENSGALT00000095450	NO
Bursa	ENSGALG00000041611	ENSGALT00000068202	NO
Bursa	ENSGALG00000041611	ENSGALT00000059177	NO
Bursa	ENSGALG00000055093	ENSGALT00000100916	NO
Bursa	ENSGALG00000047846	ENSGALT00000096804	NO
Bursa	ENSGALG00000047887	ENSGALT00000100209	NO
Bursa	ENSGALG00000055135	ENSGALT00000098187	NO
Bursa	ENSGALG00000054143	ENSGALT00000105320	NO
Bursa	101752186	XR_001469921	NO
Bursa	ENSGALG00000051156	ENSGALT00000098039	NO
Bursa	ENSGALG00000053317	ENSGALT00000099811	NO
Bursa	ENSGALG00000053317	ENSGALT00000090519	NO
Bursa	ENSGALG00000048379	ENSGALT00000003963	NO
Bursa	107055033	XR_001469954	NO
Bursa	ENSGALG00000052171	ENSGALT00000103644	NO
Bursa	ENSGALG00000046369	ENSGALT00000089937	NO
Bursa	ENSGALG00000049586	ENSGALT00000094025	NO
Bursa	ENSGALG00000054404	ENSGALT00000100260	NO
Bursa	ENSGALG00000055112	ENSGALT00000094275	NO
Bursa	ENSGALG00000006584	ENSGALT00000100487	NO
Bursa	ENSGALG00000006584	ENSGALT00000100586	NO
Bursa	ENSGALG00000035117	ENSGALT00000055582	NO
Bursa	ENSGALG00000051767	ENSGALT00000103051	NO
Bursa	ENSGALG00000044339	ENSGALT00000087845	NO
Bursa	ENSGALG00000030720	ENSGALT00000049394	NO
Bursa	ENSGALG00000050303	ENSGALT00000102425	NO
Bursa	ENSGALG00000053849	ENSGALT00000096265	NO
Bursa	ENSGALG00000052320	ENSGALT00000097187	NO
Bursa	ENSGALG00000037026	ENSGALT00000105151	NO
Bursa	ENSGALG00000037026	ENSGALT00000077801	NO
Bursa	107055110	XR_001470099	NO
Bursa	ENSGALG00000054815	ENSGALT00000103951	NO
Bursa	ENSGALG00000051668	ENSGALT00000097852	NO
Bursa	ENSGALG00000051668	ENSGALT00000063213	NO
Bursa	ENSGALG00000048377	ENSGALT00000104298	NO
Bursa	107049674	XR_001462023	NO
Bursa	ENSGALG00000047570	ENSGALT00000101956	NO
Bursa	ENSGALG00000040336	ENSGALT00000046820	NO
Bursa	ENSGALG00000018702	ENSGALT00000049587	NO
Bursa	ENSGALG00000018702	ENSGALT00000029552	NO
Bursa	ENSGALG00000018702	ENSGALT00000091135	NO
Bursa	ENSGALG00000053862	ENSGALT00000103774	NO
Bursa	ENSGALG00000053676	ENSGALT00000104765	NO
Bursa	ENSGALG00000048074	ENSGALT00000099242	NO
Bursa	ENSGALG00000054872	ENSGALT00000091424	NO
Bursa	ENSGALG00000028346	ENSGALT00000045498	NO
Bursa	ENSGALG00000051835	ENSGALT00000105045	NO
Bursa	ENSGALG00000051835	ENSGALT00000091720	NO
Bursa	ENSGALG00000044191	ENSGALT00000089578	NO
Bursa	107055197	XR_001470238	NO
Bursa	ENSGALG00000050007	ENSGALT00000095488	NO
Bursa	ENSGALG00000050007	ENSGALT00000098907	NO
Bursa	ENSGALG00000050007	ENSGALT00000103646	NO
Bursa	107055185	XR_001470204	NO
Bursa	ENSGALG00000048610	ENSGALT00000095566	NO
Bursa	ENSGALG00000050325	ENSGALT00000094727	NO
Bursa	ENSGALG00000050325	ENSGALT00000090852	YES
Bursa	ENSGALG00000050844	ENSGALT00000090797	NO
Bursa	ENSGALG00000049005	ENSGALT00000097915	NO
Bursa	ENSGALG00000049005	ENSGALT00000077729	NO
Bursa	ENSGALG00000049005	ENSGALT00000101579	NO
Bursa	ENSGALG00000052699	ENSGALT00000101361	NO
Bursa	ENSGALG00000051134	ENSGALT00000100678	NO
Bursa	ENSGALG00000053352	ENSGALT00000101539	NO
Bursa	ENSGALG00000051653	ENSGALT00000091989	NO
Bursa	ENSGALG00000048845	ENSGALT00000090755	NO
Bursa	ENSGALG00000048845	ENSGALT00000103722	NO
Bursa	ENSGALG00000054529	ENSGALT00000108111	NO
Bursa	ENSGALG00000035554	ENSGALT00000081850	NO
Bursa	ENSGALG00000035554	ENSGALT00000105868	NO
Bursa	ENSGALG00000035554	ENSGALT00000106021	NO
Bursa	107055316	XR_001470372	NO
Bursa	ENSGALG00000050999	ENSGALT00000097337	NO
Bursa	ENSGALG00000040313	ENSGALT00000069177	NO
Bursa	ENSGALG00000054934	ENSGALT00000103828	NO
Bursa	ENSGALG00000030849	ENSGALT00000069247	NO
Bursa	ENSGALG00000030849	ENSGALT00000107043	NO
Bursa	ENSGALG00000051625	ENSGALT00000101422	NO
Bursa	ENSGALG00000024395	ENSGALT00000041273	NO
Bursa	ENSGALG00000052225	ENSGALT00000106736	NO
Bursa	ENSGALG00000049825	ENSGALT00000093279	NO
Bursa	ENSGALG00000054708	ENSGALT00000107776	NO
Bursa	ENSGALG00000043925	ENSGALT00000086446	NO
Bursa	107055347	XR_001470410	NO
Bursa	107055355	XR_001470422	NO
Bursa	ENSGALG00000052514	ENSGALT00000092556	NO
Bursa	ENSGALG00000051484	ENSGALT00000095118	NO
Bursa	ENSGALG00000052626	ENSGALT00000102241	NO
Bursa	ENSGALG00000052626	ENSGALT00000093596	NO
Bursa	ENSGALG00000052626	ENSGALT00000092396	NO
Bursa	ENSGALG00000042222	ENSGALT00000070751	NO
Bursa	ENSGALG00000038201	ENSGALT00000097542	NO
Bursa	107050207	XR_001462459	YES
Bursa	ENSGALG00000053251	ENSGALT00000093216	NO
Bursa	ENSGALG00000047366	ENSGALT00000104124	NO
Bursa	ENSGALG00000054854	ENSGALT00000107985	NO
Bursa	ENSGALG00000052361	ENSGALT00000102272	NO
Bursa	ENSGALG00000054844	ENSGALT00000090806	NO
Bursa	ENSGALG00000042483	ENSGALT00000053100	NO
Bursa	ENSGALG00000042483	ENSGALT00000093924	NO
Bursa	ENSGALG00000029333	ENSGALT00000068932	NO
Bursa	ENSGALG00000029333	ENSGALT00000059911	NO
Bursa	ENSGALG00000053436	ENSGALT00000091713	NO
Bursa	ENSGALG00000042786	ENSGALT00000059915	NO
Bursa	ENSGALG00000046970	ENSGALT00000100775	NO
Bursa	ENSGALG00000043013	ENSGALT00000071878	NO
Bursa	ENSGALG00000030809	ENSGALT00000073653	NO
Bursa	ENSGALG00000030809	ENSGALT00000050765	NO
Bursa	ENSGALG00000053493	ENSGALT00000092148	NO
Bursa	ENSGALG00000055124	ENSGALT00000098139	NO
Bursa	107052011	XR_001464085	NO
Bursa	ENSGALG00000047100	ENSGALT00000097750	YES
Bursa	ENSGALG00000052036	ENSGALT00000092923	YES
Bursa	ENSGALG00000047062	ENSGALT00000092745	NO
Bursa	107052857	XR_001465627	NO
Bursa	ENSGALG00000033140	ENSGALT00000058794	NO
Bursa	ENSGALG00000033140	ENSGALT00000073309	NO
Bursa	ENSGALG00000033140	ENSGALT00000051690	NO
Bursa	ENSGALG00000027018	ENSGALT00000046074	NO
Bursa	107052963	XR_001465819	NO
Bursa	ENSGALG00000041996	ENSGALT00000093928	NO
Bursa	ENSGALG00000041996	ENSGALT00000050657	NO
Bursa	ENSGALG00000032298	ENSGALT00000081931	NO
Bursa	ENSGALG00000053539	ENSGALT00000100020	NO
Bursa	ENSGALG00000054330	ENSGALT00000090862	NO
Bursa	ENSGALG00000042313	ENSGALT00000059490	NO
Bursa	ENSGALG00000045060	ENSGALT00000104926	NO
Bursa	ENSGALG00000045060	ENSGALT00000085477	NO
Bursa	107052944	XR_001465786	NO
Bursa	107052939	XR_001465778	NO
Bursa	ENSGALG00000050185	ENSGALT00000097271	NO
Bursa	ENSGALG00000051350	ENSGALT00000105915	NO
Bursa	ENSGALG00000053693	ENSGALT00000100773	NO
Bursa	ENSGALG00000051803	ENSGALT00000101954	NO
Bursa	ENSGALG00000048414	ENSGALT00000091541	NO
Bursa	ENSGALG00000048468	ENSGALT00000107648	NO
Bursa	ENSGALG00000049568	ENSGALT00000092997	NO
Bursa	ENSGALG00000050429	ENSGALT00000103027	NO
Bursa	107052908	XR_001465715	NO
Bursa	ENSGALG00000050471	ENSGALT00000102668	NO
Bursa	ENSGALG00000041906	ENSGALT00000064789	NO
Bursa	ENSGALG00000054084	ENSGALT00000101864	NO
Bursa	ENSGALG00000048653	ENSGALT00000105792	NO
Bursa	ENSGALG00000033206	ENSGALT00000062418	NO
Bursa	ENSGALG00000033206	ENSGALT00000092789	NO
Bursa	ENSGALG00000052212	ENSGALT00000108219	NO
Bursa	ENSGALG00000053104	ENSGALT00000102698	NO
Bursa	ENSGALG00000054828	ENSGALT00000090653	NO
Bursa	ENSGALG00000052738	ENSGALT00000100778	NO
Bursa	ENSGALG00000050705	ENSGALT00000105622	YES
Bursa	ENSGALG00000053255	ENSGALT00000094147	NO
Bursa	ENSGALG00000049997	ENSGALT00000103293	NO
Bursa	ENSGALG00000053900	ENSGALT00000098341	NO
Bursa	ENSGALG00000049405	ENSGALT00000105765	NO
Bursa	107053011	XR_001465903	NO
Bursa	ENSGALG00000051692	ENSGALT00000093759	NO
Bursa	ENSGALG00000051692	ENSGALT00000103239	NO
Bursa	107052994	XR_001465867	NO
Bursa	ENSGALG00000049814	ENSGALT00000106559	NO
Bursa	ENSGALG00000048872	ENSGALT00000103399	NO
Bursa	ENSGALG00000029204	ENSGALT00000047066	NO
Bursa	ENSGALG00000048854	ENSGALT00000090776	NO
Bursa	101749082	XR_001466032	NO
Bursa	107053091	XR_001466065	NO
Bursa	ENSGALG00000038720	ENSGALT00000071214	NO
Bursa	ENSGALG00000038720	ENSGALT00000047470	NO
Bursa	ENSGALG00000038720	ENSGALT00000105172	NO
Bursa	ENSGALG00000049077	ENSGALT00000091430	NO
Bursa	ENSGALG00000049077	ENSGALT00000103596	NO
Bursa	ENSGALG00000055087	ENSGALT00000095682	NO
Bursa	ENSGALG00000055087	ENSGALT00000093629	NO
Bursa	ENSGALG00000051915	ENSGALT00000105465	NO
Bursa	ENSGALG00000052255	ENSGALT00000098973	NO
Bursa	ENSGALG00000054515	ENSGALT00000094433	NO
Bursa	ENSGALG00000048587	ENSGALT00000097309	NO
Bursa	ENSGALG00000048587	ENSGALT00000104701	NO
Bursa	ENSGALG00000050842	ENSGALT00000093169	NO
Bursa	ENSGALG00000050842	ENSGALT00000105381	NO
Bursa	ENSGALG00000052055	ENSGALT00000094424	NO
Bursa	ENSGALG00000052055	ENSGALT00000102937	NO
Bursa	ENSGALG00000052055	ENSGALT00000106285	NO
Bursa	107053112	XR_001466095	NO
Bursa	ENSGALG00000052704	ENSGALT00000097520	NO
Bursa	ENSGALG00000047107	ENSGALT00000104081	YES
Bursa	ENSGALG00000053695	ENSGALT00000101074	NO
Bursa	ENSGALG00000053847	ENSGALT00000095384	NO
Bursa	ENSGALG00000053388	ENSGALT00000107276	NO
Bursa	ENSGALG00000053197	ENSGALT00000095155	NO
Bursa	ENSGALG00000051253	ENSGALT00000091166	NO
Bursa	ENSGALG00000049113	ENSGALT00000097313	NO
Bursa	ENSGALG00000055016	ENSGALT00000103258	NO
Bursa	ENSGALG00000051377	ENSGALT00000101659	NO
Bursa	ENSGALG00000052495	ENSGALT00000097497	NO
Bursa	ENSGALG00000052495	ENSGALT00000093953	NO
Bursa	ENSGALG00000048607	ENSGALT00000101315	NO
Bursa	107051686	XR_001463412	NO
Bursa	ENSGALG00000016441	ENSGALT00000026524	NO
Bursa	ENSGALG00000052858	ENSGALT00000099623	YES
Bursa	107051690	XR_001463418	NO
Bursa	ENSGALG00000048454	ENSGALT00000105488	NO
Bursa	ENSGALG00000053085	ENSGALT00000104267	YES
Bursa	ENSGALG00000051710	ENSGALT00000090420	NO
Bursa	ENSGALG00000048206	ENSGALT00000103056	NO
Bursa	ENSGALG00000052746	ENSGALT00000102110	NO
Bursa	ENSGALG00000046987	ENSGALT00000094066	NO
Bursa	ENSGALG00000046987	ENSGALT00000102362	NO
Bursa	ENSGALG00000055097	ENSGALT00000092616	NO
Bursa	ENSGALG00000051588	ENSGALT00000094911	NO
Bursa	ENSGALG00000049498	ENSGALT00000092426	NO
Bursa	107049413	XR_001461801	NO
Bursa	ENSGALG00000046971	ENSGALT00000101013	NO
Bursa	ENSGALG00000051268	ENSGALT00000103595	YES
Bursa	ENSGALG00000054838	ENSGALT00000095412	NO
Bursa	ENSGALG00000054838	ENSGALT00000100652	NO
Bursa	ENSGALG00000049500	ENSGALT00000099477	NO
Bursa	ENSGALG00000050015	ENSGALT00000103372	NO
Bursa	ENSGALG00000054516	ENSGALT00000103896	NO
Bursa	ENSGALG00000048987	ENSGALT00000106937	NO
Bursa	ENSGALG00000052845	ENSGALT00000094094	NO
Bursa	ENSGALG00000053404	ENSGALT00000107039	NO
Bursa	ENSGALG00000047407	ENSGALT00000092727	NO
Bursa	ENSGALG00000050829	ENSGALT00000103030	NO
Bursa	107050211	XR_001462463	NO
Bursa	ENSGALG00000049038	ENSGALT00000106349	NO
Bursa	ENSGALG00000054578	ENSGALT00000101392	NO
Bursa	ENSGALG00000054072	ENSGALT00000099140	NO
Bursa	ENSGALG00000051047	ENSGALT00000107202	NO
Bursa	ENSGALG00000051047	ENSGALT00000100624	NO
Bursa	ENSGALG00000047276	ENSGALT00000095177	NO
Bursa	ENSGALG00000047649	ENSGALT00000107838	NO
Bursa	ENSGALG00000053776	ENSGALT00000100306	NO
Bursa	ENSGALG00000050985	ENSGALT00000091137	NO
Bursa	ENSGALG00000052173	ENSGALT00000094392	NO
Bursa	ENSGALG00000047584	ENSGALT00000095457	NO
Bursa	ENSGALG00000049675	ENSGALT00000107427	NO
Bursa	ENSGALG00000052438	ENSGALT00000098490	NO
Bursa	ENSGALG00000052324	ENSGALT00000106506	NO
Bursa	107050852	XR_001462829	NO
Bursa	ENSGALG00000053887	ENSGALT00000106806	NO
Bursa	ENSGALG00000052451	ENSGALT00000101625	NO
Bursa	ENSGALG00000052451	ENSGALT00000096292	NO
Bursa	ENSGALG00000052451	ENSGALT00000097914	NO
Bursa	ENSGALG00000049463	ENSGALT00000099482	YES
Bursa	ENSGALG00000052259	ENSGALT00000102037	NO
Bursa	107049828	XR_001462172	NO
Bursa	ENSGALG00000051630	ENSGALT00000099402	NO
Bursa	107051441	XR_001463121	NO
Bursa	107049206	XR_001461701	NO
Bursa	107051555	XR_001463173	NO
Bursa	ENSGALG00000053923	ENSGALT00000107654	NO
Bursa	ENSGALG00000051271	ENSGALT00000099398	NO
Bursa	ENSGALG00000051271	ENSGALT00000099549	NO
Bursa	ENSGALG00000035248	ENSGALT00000092273	NO
Bursa	ENSGALG00000050775	ENSGALT00000104239	NO
Bursa	ENSGALG00000050775	ENSGALT00000093659	NO
Bursa	ENSGALG00000054824	ENSGALT00000104154	YES
Bursa	ENSGALG00000053167	ENSGALT00000095526	YES
Bursa	ENSGALG00000053167	ENSGALT00000107370	NO
Bursa	ENSGALG00000037295	ENSGALT00000046663	NO
Bursa	ENSGALG00000047998	ENSGALT00000102066	NO
Bursa	ENSGALG00000046902	ENSGALT00000091510	NO
Bursa	ENSGALG00000054511	ENSGALT00000097674	NO
Bursa	ENSGALG00000055106	ENSGALT00000098265	NO
Bursa	ENSGALG00000055106	ENSGALT00000108043	NO
Bursa	ENSGALG00000049883	ENSGALT00000095813	NO
Bursa	ENSGALG00000049883	ENSGALT00000101079	NO
Bursa	ENSGALG00000051169	ENSGALT00000092369	NO
Bursa	ENSGALG00000047410	ENSGALT00000102091	NO
Bursa	ENSGALG00000047410	ENSGALT00000094544	NO
Bursa	ENSGALG00000047410	ENSGALT00000105189	NO
Bursa	ENSGALG00000034236	ENSGALT00000064450	NO
Bursa	ENSGALG00000051057	ENSGALT00000107929	NO
Bursa	ENSGALG00000047219	ENSGALT00000104964	NO
Bursa	ENSGALG00000047219	ENSGALT00000090455	NO
Bursa	ENSGALG00000053473	ENSGALT00000104136	YES
Bursa	ENSGALG00000020320	ENSGALT00000102109	NO
Bursa	ENSGALG00000020320	ENSGALT00000032405	NO
Bursa	101749419	XR_001464169	NO
Bursa	101749419	XR_001464168	NO
Bursa	ENSGALG00000041397	ENSGALT00000101064	NO
Bursa	ENSGALG00000041397	ENSGALT00000058068	NO
Bursa	ENSGALG00000047730	ENSGALT00000090524	NO
Bursa	ENSGALG00000051373	ENSGALT00000105536	NO
Bursa	ENSGALG00000054354	ENSGALT00000096019	NO
Bursa	ENSGALG00000054878	ENSGALT00000090793	NO
Bursa	ENSGALG00000023692	ENSGALT00000039586	NO
Bursa	ENSGALG00000040732	ENSGALT00000095880	NO
Bursa	ENSGALG00000040732	ENSGALT00000105844	NO
Bursa	ENSGALG00000051025	ENSGALT00000091055	NO
Bursa	ENSGALG00000051025	ENSGALT00000104049	NO
Bursa	107052084	XR_001464223	NO
Bursa	ENSGALG00000050618	ENSGALT00000097726	NO
Bursa	ENSGALG00000049528	ENSGALT00000104997	NO
Bursa	ENSGALG00000049528	ENSGALT00000105647	NO
Bursa	ENSGALG00000046723	ENSGALT00000093978	NO
Bursa	ENSGALG00000054233	ENSGALT00000104709	NO
Bursa	ENSGALG00000050541	ENSGALT00000093685	NO
Bursa	ENSGALG00000051763	ENSGALT00000106485	NO
Bursa	ENSGALG00000047398	ENSGALT00000101071	NO
Bursa	ENSGALG00000047398	ENSGALT00000094800	NO
Bursa	101748522	XR_001466282	NO
Bursa	107053230	XR_001466303	NO
Bursa	107051785	XR_001463667	NO
Bursa	ENSGALG00000052835	ENSGALT00000097302	NO
Bursa	ENSGALG00000043141	ENSGALT00000053190	NO
Bursa	ENSGALG00000048950	ENSGALT00000104517	NO
Bursa	107051777	XR_001463655	NO
Bursa	107051776	XR_001463654	NO
Bursa	ENSGALG00000046936	ENSGALT00000098277	NO
Bursa	ENSGALG00000043529	ENSGALT00000047866	NO
Bursa	107051772	XR_001463648	NO
Bursa	ENSGALG00000053688	ENSGALT00000098231	NO
Bursa	ENSGALG00000037040	ENSGALT00000060460	NO
Bursa	ENSGALG00000037040	ENSGALT00000056435	NO
Bursa	ENSGALG00000051889	ENSGALT00000103146	NO
Bursa	ENSGALG00000049674	ENSGALT00000101353	NO
Bursa	ENSGALG00000046733	ENSGALT00000107373	NO
Bursa	ENSGALG00000036848	ENSGALT00000095781	NO
Bursa	ENSGALG00000036848	ENSGALT00000052859	NO
Bursa	ENSGALG00000053686	ENSGALT00000101475	NO
Bursa	ENSGALG00000053686	ENSGALT00000092758	NO
Bursa	ENSGALG00000053686	ENSGALT00000097030	NO
Bursa	ENSGALG00000054742	ENSGALT00000095524	NO
Bursa	ENSGALG00000054742	ENSGALT00000103475	NO
Bursa	ENSGALG00000046857	ENSGALT00000096200	NO
Bursa	ENSGALG00000050835	ENSGALT00000107320	NO
Bursa	ENSGALG00000051314	ENSGALT00000102883	NO
Bursa	107051741	XR_001463594	YES
Bursa	ENSGALG00000053080	ENSGALT00000093913	NO
Bursa	ENSGALG00000053080	ENSGALT00000101176	NO
Bursa	ENSGALG00000047308	ENSGALT00000106148	NO
Bursa	ENSGALG00000049992	ENSGALT00000107119	NO
Bursa	ENSGALG00000048523	ENSGALT00000100532	NO
Bursa	ENSGALG00000048901	ENSGALT00000104938	NO
Bursa	107051707	XR_001463502	NO
Bursa	107051708	XR_001463505	NO
Bursa	ENSGALG00000041661	ENSGALT00000077589	NO
Bursa	ENSGALG00000053133	ENSGALT00000102448	YES
Bursa	ENSGALG00000050183	ENSGALT00000097880	NO
Bursa	ENSGALG00000047368	ENSGALT00000098346	NO
Bursa	ENSGALG00000048737	ENSGALT00000100861	NO
Bursa	ENSGALG00000037329	ENSGALT00000061044	NO
Bursa	ENSGALG00000051641	ENSGALT00000108159	NO
Bursa	ENSGALG00000053101	ENSGALT00000095948	NO
Bursa	ENSGALG00000052454	ENSGALT00000107324	NO
Bursa	ENSGALG00000039074	ENSGALT00000063939	NO
Bursa	ENSGALG00000054403	ENSGALT00000098372	NO
Bursa	ENSGALG00000053319	ENSGALT00000097908	NO
Bursa	107053234	XR_001466310	NO
Bursa	ENSGALG00000051640	ENSGALT00000105970	NO
Bursa	ENSGALG00000048118	ENSGALT00000100946	YES
Bursa	ENSGALG00000054142	ENSGALT00000107260	YES
Bursa	ENSGALG00000048868	ENSGALT00000091220	NO
Bursa	ENSGALG00000051701	ENSGALT00000106419	NO
Bursa	ENSGALG00000051262	ENSGALT00000098678	NO
Bursa	ENSGALG00000054849	ENSGALT00000090431	YES
Bursa	ENSGALG00000050453	ENSGALT00000099836	YES
Bursa	ENSGALG00000051787	ENSGALT00000095738	YES
Bursa	ENSGALG00000045173	ENSGALT00000086096	NO
Bursa	ENSGALG00000049833	ENSGALT00000092150	NO
Bursa	107053320	XR_001466469	NO
Bursa	ENSGALG00000046981	ENSGALT00000103028	NO
Bursa	107053317	XR_001466465	NO
Bursa	ENSGALG00000048634	ENSGALT00000092532	NO
Bursa	ENSGALG00000052273	ENSGALT00000091200	NO
Bursa	ENSGALG00000052189	ENSGALT00000102544	NO
Bursa	ENSGALG00000044501	ENSGALT00000088776	NO
Bursa	ENSGALG00000048257	ENSGALT00000107356	NO
Bursa	ENSGALG00000035064	ENSGALT00000077592	NO
Bursa	107053344	XR_001466503	NO
Bursa	ENSGALG00000030266	ENSGALT00000096280	NO
Bursa	ENSGALG00000049914	ENSGALT00000108213	NO
Bursa	ENSGALG00000048906	ENSGALT00000091387	NO
Bursa	ENSGALG00000048906	ENSGALT00000101870	NO
Bursa	ENSGALG00000054963	ENSGALT00000101362	NO
Bursa	ENSGALG00000049523	ENSGALT00000103397	NO
Bursa	ENSGALG00000020510	ENSGALT00000072167	NO
Bursa	ENSGALG00000020510	ENSGALT00000032726	NO
Bursa	ENSGALG00000034894	ENSGALT00000061765	NO
Bursa	ENSGALG00000053062	ENSGALT00000103745	NO
Bursa	ENSGALG00000052720	ENSGALT00000091885	NO
Bursa	ENSGALG00000054203	ENSGALT00000093477	NO
Bursa	ENSGALG00000054893	ENSGALT00000099876	NO
Bursa	ENSGALG00000049199	ENSGALT00000105686	NO
Bursa	ENSGALG00000050436	ENSGALT00000105402	NO
Bursa	ENSGALG00000047791	ENSGALT00000106731	NO
Bursa	ENSGALG00000051601	ENSGALT00000103433	NO
Bursa	ENSGALG00000051601	ENSGALT00000106207	NO
Bursa	ENSGALG00000030338	ENSGALT00000065948	NO
Bursa	ENSGALG00000052290	ENSGALT00000106673	NO
Bursa	ENSGALG00000051988	ENSGALT00000093657	NO
Bursa	ENSGALG00000050751	ENSGALT00000099582	NO
Bursa	ENSGALG00000033156	ENSGALT00000051578	NO
Bursa	ENSGALG00000051618	ENSGALT00000102922	NO
Bursa	ENSGALG00000046978	ENSGALT00000106386	NO
Bursa	ENSGALG00000047795	ENSGALT00000102516	NO
Bursa	ENSGALG00000036383	ENSGALT00000079690	NO
Bursa	ENSGALG00000051736	ENSGALT00000098764	NO
Bursa	107053471	XR_001466723	NO
Bursa	100859336	XR_001466721	NO
Bursa	ENSGALG00000033009	ENSGALT00000090552	NO
Bursa	ENSGALG00000051929	ENSGALT00000108082	NO
Bursa	ENSGALG00000051929	ENSGALT00000099433	NO
Bursa	ENSGALG00000053237	ENSGALT00000092356	NO
Bursa	ENSGALG00000053627	ENSGALT00000090454	NO
Bursa	ENSGALG00000053627	ENSGALT00000098716	NO
Bursa	107053443	XR_001466683	NO
Bursa	ENSGALG00000033973	ENSGALT00000104853	NO
Bursa	ENSGALG00000052644	ENSGALT00000094899	YES
Bursa	ENSGALG00000054613	ENSGALT00000101892	NO
Bursa	ENSGALG00000037493	ENSGALT00000081331	NO
Bursa	ENSGALG00000052965	ENSGALT00000097876	NO
Bursa	ENSGALG00000054243	ENSGALT00000097777	NO
Bursa	ENSGALG00000037692	ENSGALT00000055632	NO
[truncated: 11,374 more rows]
