# Supplementary material for: Transcriptomes of an Array of Chicken Ovary, Intestinal, and Immune Cells and Tissues
Source: Front Genet. 2021 Jun 30;12:664424. doi: 10.3389/fgene.2021.664424 (PMC8278112; doi:10.3389/fgene.2021.664424)
Supplement: Supplementary Table 4 — Co-expressed and H2H pairs (related to Figure 4 and Supplementary Figure 6). (Sheet 1) Co-expressed transcript pairs. (Sheet 2) Mono-expressed transcript pairs. (Sheet 3) Co-expressed H2H transcript pairs. (Sheet 4) Mono-expressed H2H transcript pairs. [file Table_4.XLSX]

## Sheet: Co-Expressed Genomic-Coordinate
Supplemental Table 4: Co-expressed Genomic-Coordinate Transcript Pairs
Cell Type	Transcript 1	Transcript 2
B Cell	ENSGALT00000105029 (CLC2DL3)	ENSGALT00000099458 (ENSGALG00000050833)
B Cell	ENSGALT00000090989 (CLC2DL3)	ENSGALT00000099458 (ENSGALG00000050833)
B Cell	ENSGALT00000013282 (GDI1)	ENSGALT00000092270 (FBXO18)
B Cell	ENSGALT00000105830 (ENSGALG00000050475)	ENSGALT00000101201 (ENSGALG00000052368)
B Cell	ENSGALT00000010717 (TMEM243)	ENSGALT00000075153 (DMTF1)
B Cell	ENSGALT00000013473 (PMPCB)	ENSGALT00000013428 (DNAJC2)
B Cell	ENSGALT00000013062 (HBP1)	ENSGALT00000068162 (COG5)
B Cell	ENSGALT00000039460 (DUS4L)	ENSGALT00000068162 (COG5)
B Cell	ENSGALT00000038864 (IMMP2L)	ENSGALT00000015449 (LRRN3)
B Cell	ENSGALT00000100843 (ENSGALG00000051395)	ENSGALT00000015947 (PPM1H)
B Cell	ENSGALT00000042655 (HIST1H3H)	ENSGALT00000098465 (ENSGALG00000046904)
B Cell	ENSGALT00000068252 (C1H12ORF73)	ENSGALT00000052099 (TDG)
B Cell	ENSGALT00000020831 (ENSGALG00000012766)	ENSGALT00000090916 (CHPT1)
B Cell	ENSGALT00000021244 (CHUNK-1)	ENSGALT00000058315 (ENSGALG00000036964)
B Cell	ENSGALT00000094657 (ENSGALG00000053936)	ENSGALT00000101905 (BID)
B Cell	ENSGALT00000070978 (ETFRF1)	ENSGALT00000063299 (KRAS)
B Cell	ENSGALT00000097946 (TSPO)	ENSGALT00000069414 (MCAT)
B Cell	ENSGALT00000060327 (ENSGALG00000048687)	ENSGALT00000104378 (ENSGALG00000050747)
B Cell	ENSGALT00000023289 (FAM162A)	ENSGALT00000084532 (CCDC58)
B Cell	ENSGALT00000060423 (NAA50)	ENSGALT00000096999 (ENSGALG00000053172)
B Cell	ENSGALT00000079058 (NEPRO)	ENSGALT00000085162 (TAF13)
B Cell	ENSGALT00000091824 (NEPRO)	ENSGALT00000085162 (TAF13)
B Cell	ENSGALT00000024500 (NEPRO)	ENSGALT00000085162 (TAF13)
B Cell	ENSGALT00000024577 (NME7)	ENSGALT00000036926 (ATP1B1)
B Cell	ENSGALT00000094022 (NME7)	ENSGALT00000036926 (ATP1B1)
B Cell	ENSGALT00000024648 (ENSGALG00000015271)	ENSGALT00000100753 (CMSS1)
B Cell	ENSGALT00000094520 (HHLA2)	ENSGALT00000024781 (IFT57)
B Cell	ENSGALT00000036866 (ENSGALG00000024077)	ENSGALT00000070424 (MINA)
B Cell	ENSGALT00000101025 (ENSGALG00000024077)	ENSGALT00000070424 (MINA)
B Cell	ENSGALT00000107622 (ENSGALG00000053808)	ENSGALT00000030405 (POU2F1)
B Cell	ENSGALT00000105738 (CD80)	ENSGALT00000041393 (TIMMDC1)
B Cell	ENSGALT00000068147 (JAM2)	ENSGALT00000063486 (ATP5PF)
B Cell	ENSGALT00000030337 (GATD3A)	ENSGALT00000092229 (ENSGALG00000046714)
B Cell	ENSGALT00000054938 (CASK)	ENSGALT00000026167 (GPR34)
B Cell	ENSGALT00000104408 (CASK)	ENSGALT00000026167 (GPR34)
B Cell	ENSGALT00000091460 (CASK)	ENSGALT00000026167 (GPR34)
B Cell	ENSGALT00000064964 (KLHL15)	ENSGALT00000026357 (EIF2S3)
B Cell	ENSGALT00000107403 (TRAPPC2)	ENSGALT00000026762 (RAB9A)
B Cell	ENSGALT00000063432 (ENSGALG00000016760)	ENSGALT00000027063 (LYG2)
B Cell	ENSGALT00000063432 (ENSGALG00000016760)	ENSGALT00000027060 (MITD1)
B Cell	ENSGALT00000049451 (ING1)	ENSGALT00000093925 (CARS2)
B Cell	ENSGALT00000027271 (GPR183)	ENSGALT00000058077 (UBAC2)
B Cell	ENSGALT00000036524 (GPR18)	ENSGALT00000058077 (UBAC2)
B Cell	ENSGALT00000027350 (GATD3AL1)	ENSGALT00000062362 (ACOD1)
B Cell	ENSGALT00000082158 (GATD3AL1)	ENSGALT00000062362 (ACOD1)
B Cell	ENSGALT00000027397 (WBP4)	ENSGALT00000027391 (ELF1)
B Cell	ENSGALT00000027426 (GTF2F2)	ENSGALT00000027428 (KCTD4)
B Cell	ENSGALT00000036484 (RB1)	ENSGALT00000027460 (LPAR6)
B Cell	ENSGALT00000036465 (SUPT20H)	ENSGALT00000106619 (EXOSC8)
B Cell	ENSGALT00000027620 (MTIF3)	ENSGALT00000027621 (GTF3A)
B Cell	ENSGALT00000091286 (MTIF3)	ENSGALT00000027621 (GTF3A)
B Cell	ENSGALT00000096571 (ENSGALG00000051838)	ENSGALT00000067696 (NUP58)
B Cell	ENSGALT00000099250 (ENSGALG00000017220)	ENSGALT00000060059 (ENSGALG00000040433)
B Cell	ENSGALT00000101883 (ENSGALG00000017220)	ENSGALT00000060059 (ENSGALG00000040433)
B Cell	ENSGALT00000027834 (ENSGALG00000017220)	ENSGALT00000060059 (ENSGALG00000040433)
B Cell	ENSGALT00000042575 (ENSGALG00000025662)	ENSGALT00000060059 (ENSGALG00000040433)
B Cell	ENSGALT00000042593 (ENSGALG00000025680)	ENSGALT00000060059 (ENSGALG00000040433)
B Cell	ENSGALT00000095300 (FAM168A)	ENSGALT00000086546 (ENSGALG00000044739)
B Cell	ENSGALT00000105587 (ENSGALG00000052767)	ENSGALT00000036373 (HBBA)
B Cell	ENSGALT00000091123 (ENSGALG00000047924)	ENSGALT00000098387 (ENSGALG00000038550)
B Cell	ENSGALT00000103620 (ENSGALG00000047924)	ENSGALT00000098387 (ENSGALG00000038550)
B Cell	ENSGALT00000104085 (PARP6)	ENSGALT00000048878 (ENSGALG00000031313)
B Cell	ENSGALT00000053892 (CCPG1)	ENSGALT00000053275 (PIGB)
B Cell	ENSGALT00000051937 (ENSGALG00000033780)	ENSGALT00000058852 (ITGB1BP3)
B Cell	ENSGALT00000091589 (ENSGALG00000033780)	ENSGALT00000058852 (ITGB1BP3)
B Cell	ENSGALT00000085495 (POLG)	ENSGALT00000010770 (FANCI)
B Cell	ENSGALT00000012093 (HACD3)	ENSGALT00000094572 (VWA9)
B Cell	ENSGALT00000012364 (DIS3L)	ENSGALT00000062194 (TIPIN)
B Cell	ENSGALT00000038202 (SPG11)	ENSGALT00000013336 (EIF3J)
B Cell	ENSGALT00000085779 (ENSGALG00000045045)	ENSGALT00000013516 (CIB4)
B Cell	ENSGALT00000090795 (ENSGALG00000047540)	ENSGALT00000105914 (ENSGALG00000051766)
B Cell	ENSGALT00000074111 (CIAPIN1)	ENSGALT00000001797 (COQ9)
B Cell	ENSGALT00000101967 (NUDT21)	ENSGALT00000004848 (OGFOD1)
B Cell	ENSGALT00000004875 (NUDT21)	ENSGALT00000004848 (OGFOD1)
B Cell	ENSGALT00000106471 (DDX28)	ENSGALT00000005388 (DUS2)
B Cell	ENSGALT00000092066 (ENSGALG00000052008)	ENSGALT00000006090 (ADCY7)
B Cell	ENSGALT00000075864 (ITFG1)	ENSGALT00000042911 (PHKB)
B Cell	ENSGALT00000085464 (VPS35)	ENSGALT00000063938 (ORC6)
B Cell	ENSGALT00000006976 (VPS35)	ENSGALT00000007052 (ENSGALG00000004428)
B Cell	ENSGALT00000087605 (FAAP24)	ENSGALT00000007588 (CEP89)
B Cell	ENSGALT00000063003 (SS18L2)	ENSGALT00000076733 (KIAA0355)
B Cell	ENSGALT00000007911 (SS18L2)	ENSGALT00000076733 (KIAA0355)
B Cell	ENSGALT00000000702 (ZNF276)	ENSGALT00000038833 (VPS9D1)
B Cell	ENSGALT00000044355 (DEF8)	ENSGALT00000101009 (DBNDD1)
B Cell	ENSGALT00000000910 (UTP4)	ENSGALT00000058298 (CHTF8)
B Cell	ENSGALT00000059294 (ENSGALG00000040713)	ENSGALT00000098624 (PDF)
B Cell	ENSGALT00000047563 (KARS)	ENSGALT00000001325 (TERF2IP)
B Cell	ENSGALT00000001334 (KARS)	ENSGALT00000001325 (TERF2IP)
B Cell	ENSGALT00000003917 (RNF123)	ENSGALT00000105582 (AMIGO3)
B Cell	ENSGALT00000069748 (PPM1M)	ENSGALT00000006336 (TWF2)
B Cell	ENSGALT00000007462 (IPPK)	ENSGALT00000007467 (CENPP)
B Cell	ENSGALT00000045876 (OMD)	ENSGALT00000007467 (CENPP)
B Cell	ENSGALT00000007983 (TSEN2)	ENSGALT00000043832 (MKRN2OS)
B Cell	ENSGALT00000010655 (MTMR14)	ENSGALT00000106180 (LHFPL4)
B Cell	ENSGALT00000095289 (MTMR14)	ENSGALT00000106180 (LHFPL4)
B Cell	ENSGALT00000011252 (ENSGALG00000006944)	ENSGALT00000011237 (P4HTM)
B Cell	ENSGALT00000044814 (SLC25A20)	ENSGALT00000063242 (ARIH2)
B Cell	ENSGALT00000013716 (CAND2)	ENSGALT00000047226 (SEC13)
B Cell	ENSGALT00000073565 (IFT122)	ENSGALT00000096664 (MBD4)
B Cell	ENSGALT00000082836 (ENSGALG00000029346)	ENSGALT00000064754 (ZMAT2)
B Cell	ENSGALT00000044150 (INSYN2B)	ENSGALT00000003239 (DOCK2)
B Cell	ENSGALT00000047574 (SLU7)	ENSGALT00000002291 (PTTG2)
B Cell	ENSGALT00000050464 (SLU7)	ENSGALT00000002291 (PTTG2)
B Cell	ENSGALT00000005307 (ENSGALG00000003355)	ENSGALT00000005313 (ARL10)
B Cell	ENSGALT00000051301 (ENSGALG00000038576)	ENSGALT00000006053 (CYFIP2)
B Cell	ENSGALT00000063933 (HNRNPH2)	ENSGALT00000009585 (DGUOK)
B Cell	ENSGALT00000080575 (HNRNPH2)	ENSGALT00000009585 (DGUOK)
B Cell	ENSGALT00000088178 (HNRNPH2)	ENSGALT00000009585 (DGUOK)
B Cell	ENSGALT00000095094 (ENSGALG00000034305)	ENSGALT00000107573 (ENSGALG00000047174)
B Cell	ENSGALT00000005357 (EIF2AK1)	ENSGALT00000098827 (ANKRD61)
B Cell	ENSGALT00000060524 (GPR146)	ENSGALT00000103266 (C7orf50)
B Cell	ENSGALT00000006456 (GPR146)	ENSGALT00000103266 (C7orf50)
B Cell	ENSGALT00000092653 (GPR146)	ENSGALT00000103266 (C7orf50)
B Cell	ENSGALT00000071421 (GPR146)	ENSGALT00000103266 (C7orf50)
B Cell	ENSGALT00000102216 (ENSGALG00000050332)	ENSGALT00000103266 (C7orf50)
B Cell	ENSGALT00000006465 (GPER1)	ENSGALT00000103266 (C7orf50)
B Cell	ENSGALT00000008614 (NARFL)	ENSGALT00000008668 (HAGHL)
B Cell	ENSGALT00000008778 (NDUFB10)	ENSGALT00000008816 (RPS2)
B Cell	ENSGALT00000009864 (PLK1)	ENSGALT00000043152 (ERN2)
B Cell	ENSGALT00000010182 (KDM8)	ENSGALT00000010199 (NSMCE1)
B Cell	ENSGALT00000096336 (GNPTG)	ENSGALT00000010385 (TSR3)
B Cell	ENSGALT00000010394 (GNPTG)	ENSGALT00000010385 (TSR3)
B Cell	ENSGALT00000011412 (METTL9)	ENSGALT00000042629 (IGSF6)
B Cell	ENSGALT00000043053 (SNRNP25)	ENSGALT00000028385 (POLR3K)
B Cell	ENSGALT00000090507 (VASN)	ENSGALT00000067660 (CORO7)
B Cell	ENSGALT00000096935 (DNAJA3)	ENSGALT00000067660 (CORO7)
B Cell	ENSGALT00000012696 (DNAJA3)	ENSGALT00000067660 (CORO7)
B Cell	ENSGALT00000073893 (DNAJA3)	ENSGALT00000067660 (CORO7)
B Cell	ENSGALT00000015164 (IFT140)	ENSGALT00000096436 (TMEM204)
B Cell	ENSGALT00000093515 (LYRM1)	ENSGALT00000080718 (DCUN1D3)
B Cell	ENSGALT00000095976 (MRPL40)	ENSGALT00000077327 (HIRA)
B Cell	ENSGALT00000098425 (COMT)	ENSGALT00000107088 (TXNRD2)
B Cell	ENSGALT00000100516 (RANBP1)	ENSGALT00000003266 (TRMT2A)
B Cell	ENSGALT00000005160 (EIF2B1)	ENSGALT00000005224 (DDX55)
B Cell	ENSGALT00000060434 (TCTN1)	ENSGALT00000101741 (HVCN1)
B Cell	ENSGALT00000009009 (SRRD)	ENSGALT00000008976 (HPS4)
B Cell	ENSGALT00000102863 (DTX1)	ENSGALT00000013239 (RASAL1)
B Cell	ENSGALT00000104621 (ENSGALG00000053730)	ENSGALT00000046723 (ENSGALG00000049208)
B Cell	ENSGALT00000097213 (ENSGALG00000048880)	ENSGALT00000046723 (ENSGALG00000049208)
B Cell	ENSGALT00000091078 (ENSGALG00000047380)	ENSGALT00000046723 (ENSGALG00000049208)
B Cell	ENSGALT00000093088 (ENSGALG00000047380)	ENSGALT00000046723 (ENSGALG00000049208)
B Cell	ENSGALT00000097044 (ENSGALG00000050091)	ENSGALT00000046723 (ENSGALG00000049208)
B Cell	ENSGALT00000083575 (ENSGALG00000047794)	ENSGALT00000046723 (ENSGALG00000049208)
B Cell	ENSGALT00000042868 (BG8)	ENSGALT00000060138 (TRIM7.2)
B Cell	ENSGALT00000075743 (ENSGALG00000040101)	ENSGALT00000060138 (TRIM7.2)
B Cell	ENSGALT00000000109 (IL4I1)	ENSGALT00000060138 (TRIM7.2)
B Cell	ENSGALT00000075892 (KIFC1)	ENSGALT00000060138 (TRIM7.2)
B Cell	ENSGALT00000074567 (ZNF692)	ENSGALT00000060138 (TRIM7.2)
B Cell	ENSGALT00000000183 (BLEC1)	ENSGALT00000068635 (BLB1)
B Cell	ENSGALT00000066783 (BF1)	ENSGALT00000047881 (TAP1)
B Cell	ENSGALT00000091470 (FLOT1)	ENSGALT00000076672 (TUBB)
B Cell	ENSGALT00000076895 (DPP7)	ENSGALT00000106784 (ENSGALG00000047814)
B Cell	ENSGALT00000098363 (ENSGALG00000050552)	ENSGALT00000061328 (TMEM141)
B Cell	ENSGALT00000014314 (RPL12)	ENSGALT00000014334 (LRSAM1)
B Cell	ENSGALT00000067722 (RPL12)	ENSGALT00000014334 (LRSAM1)
B Cell	ENSGALT00000056382 (TOR2A)	ENSGALT00000083587 (ENSGALG00000045436)
B Cell	ENSGALT00000039770 (SPTAN1)	ENSGALT00000007489 (WDR34)
B Cell	ENSGALT00000055598 (NUP188)	ENSGALT00000045347 (DOLK)
B Cell	ENSGALT00000089974 (NTMT1)	ENSGALT00000108244 (ASB6)
B Cell	ENSGALT00000072855 (USP20)	ENSGALT00000006601 (C9orf78)
B Cell	ENSGALT00000094669 (POMT1)	ENSGALT00000005921 (UCK1)
B Cell	ENSGALT00000087416 (RPL7A)	ENSGALT00000005076 (MED22)
B Cell	ENSGALT00000005036 (ENSGALG00000003175)	ENSGALT00000071842 (REXO4)
B Cell	ENSGALT00000002038 (MRRFP1)	ENSGALT00000044500 (RBM18)
B Cell	ENSGALT00000001858 (RABGAP1)	ENSGALT00000063306 (ZBTB26)
B Cell	ENSGALT00000057653 (RABEPK)	ENSGALT00000001495 (PPP6C)
B Cell	ENSGALT00000092370 (RALGPS1)	ENSGALT00000001362 (ANGPTL2)
B Cell	ENSGALT00000084390 (ENSGALG00000024335)	ENSGALT00000041141 (ENSGALG00000050425)
B Cell	ENSGALT00000081425 (ADPRM)	ENSGALT00000091102 (SCO1)
B Cell	ENSGALT00000002182 (B3GNTL1)	ENSGALT00000064276 (TBCD)
B Cell	ENSGALT00000073781 (SRSF2)	ENSGALT00000002759 (METTL23)
B Cell	ENSGALT00000003814 (RECQL5)	ENSGALT00000003817 (SMIM5)
B Cell	ENSGALT00000004493 (DCXR)	ENSGALT00000053553 (RAC3)
B Cell	ENSGALT00000004723 (UTP18)	ENSGALT00000049823 (MBTD1)
B Cell	ENSGALT00000086598 (ENSGALG00000046212)	ENSGALT00000005570 (POLG2)
B Cell	ENSGALT00000095937 (ENSGALG00000046212)	ENSGALT00000005570 (POLG2)
B Cell	ENSGALT00000006665 (ARSG)	ENSGALT00000006617 (SLC16A6)
B Cell	ENSGALT00000053808 (COG1)	ENSGALT00000073416 (FAM104A)
B Cell	ENSGALT00000019296 (CANT1)	ENSGALT00000107490 (ENGASE)
B Cell	ENSGALT00000105119 (ENSGALG00000047043)	ENSGALT00000011630 (PGS1)
B Cell	ENSGALT00000102346 (ENSGALG00000049911)	ENSGALT00000011710 (ALYREF)
B Cell	ENSGALT00000012890 (KCTD2)	ENSGALT00000084498 (ATP5PD)
B Cell	ENSGALT00000080909 (MRPS7)	ENSGALT00000044481 (MIF4GD)
B Cell	ENSGALT00000085665 (MRPS7)	ENSGALT00000044481 (MIF4GD)
B Cell	ENSGALT00000083321 (ENSGALG00000052672)	ENSGALT00000073675 (ENSGALG00000033320)
B Cell	ENSGALT00000052025 (DDX25)	ENSGALT00000073675 (ENSGALG00000033320)
B Cell	ENSGALT00000053956 (ENSGALG00000037051)	ENSGALT00000073675 (ENSGALG00000033320)
B Cell	ENSGALT00000049551 (ENSGALG00000037051)	ENSGALT00000073675 (ENSGALG00000033320)
B Cell	ENSGALT00000102336 (ENSGALG00000001049)	ENSGALT00000107005 (MTMR4)
B Cell	ENSGALT00000002870 (LRWD1)	ENSGALT00000053454 (POLR2J)
B Cell	ENSGALT00000088357 (TMEM120A)	ENSGALT00000097118 (POR)
B Cell	ENSGALT00000003887 (ENSGALG00000002463)	ENSGALT00000003916 (PHKG1)
B Cell	ENSGALT00000102817 (ENSGALG00000054757)	ENSGALT00000004274 (MYO1C)
B Cell	ENSGALT00000004993 (SRR)	ENSGALT00000058580 (SMG6)
B Cell	ENSGALT00000007345 (P2RX5)	ENSGALT00000084902 (EMC6)
B Cell	ENSGALT00000008627 (ZNHIT3)	ENSGALT00000090994 (MYO19)
B Cell	ENSGALT00000050118 (EVI2A)	ENSGALT00000055292 (NF1)
B Cell	ENSGALT00000068634 (ENSGALG00000035589)	ENSGALT00000055292 (NF1)
B Cell	ENSGALT00000008974 (OMG)	ENSGALT00000055292 (NF1)
B Cell	ENSGALT00000009146 (TMEM97)	ENSGALT00000086153 (IFT20)
B Cell	ENSGALT00000008701 (JMJD4)	ENSGALT00000106860 (SNAP47)
B Cell	ENSGALT00000105954 (ENSGALG00000053469)	ENSGALT00000010035 (PRKAG2)
B Cell	ENSGALT00000015413 (RBM48)	ENSGALT00000015424 (EFCAB1)
B Cell	ENSGALT00000065275 (CBX3)	ENSGALT00000090968 (HNRNPA2B1)
B Cell	ENSGALT00000102095 (METTL6)	ENSGALT00000065313 (EAF1)
B Cell	ENSGALT00000081699 (METTL6)	ENSGALT00000065313 (EAF1)
B Cell	ENSGALT00000094838 (ENSGALG00000049242)	ENSGALT00000088433 (ENSGALG00000046360)
B Cell	ENSGALT00000020778 (GFOD1)	ENSGALT00000102638 (ENSGALG00000047333)
B Cell	ENSGALT00000020801 (NEDD9)	ENSGALT00000031049 (C1orf145)
B Cell	ENSGALT00000102872 (NEDD9)	ENSGALT00000031049 (C1orf145)
B Cell	ENSGALT00000046536 (FASTKD3)	ENSGALT00000079280 (MTRR)
B Cell	ENSGALT00000092899 (CCDC127)	ENSGALT00000021508 (SDHA)
B Cell	ENSGALT00000021913 (TEX10)	ENSGALT00000030979 (INVS)
B Cell	ENSGALT00000022489 (PTPN2)	ENSGALT00000022485 (PSMG2)
B Cell	ENSGALT00000107024 (ENSGALG00000031167)	ENSGALT00000076291 (COPS5)
B Cell	ENSGALT00000069458 (E2F5)	ENSGALT00000092993 (RBIS)
B Cell	ENSGALT00000059601 (PTDSS1)	ENSGALT00000082823 (MTERF3)
B Cell	ENSGALT00000065707 (DCAF13)	ENSGALT00000048847 (SLC25A32)
B Cell	ENSGALT00000099697 (NFS1)	ENSGALT00000085125 (ROMO1)
B Cell	ENSGALT00000002384 (NFS1)	ENSGALT00000085125 (ROMO1)
B Cell	ENSGALT00000075646 (ENSGALG00000004110)	ENSGALT00000006521 (STK4)
B Cell	ENSGALT00000006537 (ENSGALG00000004110)	ENSGALT00000006521 (STK4)
B Cell	ENSGALT00000085389 (SIRPA)	ENSGALT00000074450 (ENSGALG00000029485)
B Cell	ENSGALT00000033797 (ENSGALG00000021025)	ENSGALT00000078202 (BCL2L1)
B Cell	ENSGALT00000099850 (TTI1)	ENSGALT00000010979 (RPRD1B)
B Cell	ENSGALT00000010982 (TTI1)	ENSGALT00000010979 (RPRD1B)
B Cell	ENSGALT00000011080 (ZSWIM3)	ENSGALT00000011074 (ACOT8)
B Cell	ENSGALT00000092014 (TNFRSF9)	ENSGALT00000083827 (PARK7)
B Cell	ENSGALT00000067446 (KLHL21)	ENSGALT00000076662 (PHF13)
B Cell	ENSGALT00000001015 (RPL22)	ENSGALT00000063844 (RNF207)
B Cell	ENSGALT00000002586 (INTS11)	ENSGALT00000002613 (ENSGALG00000001701)
B Cell	ENSGALT00000006360 (MRTO4)	ENSGALT00000006382 (AKR7L)
B Cell	ENSGALT00000087131 (MAD2L2)	ENSGALT00000100757 (ENSGALG00000004646)
B Cell	ENSGALT00000086802 (MAD2L2)	ENSGALT00000100757 (ENSGALG00000004646)
B Cell	ENSGALT00000103576 (BIN3)	ENSGALT00000107450 (ENSGALG00000052840)
B Cell	ENSGALT00000101019 (ENSGALG00000046740)	ENSGALT00000070374 (XPO7)
B Cell	ENSGALT00000002549 (MAK16)	ENSGALT00000002520 (TTI2)
B Cell	ENSGALT00000046784 (IKBKB)	ENSGALT00000087080 (ENSGALG00000041463)
B Cell	ENSGALT00000097651 (ENSGALG00000049780)	ENSGALT00000054933 (CIAO1)
B Cell	ENSGALT00000049116 (NCAPH)	ENSGALT00000107458 (ENSGALG00000050253)
B Cell	ENSGALT00000062687 (ENSGALG00000031789)	ENSGALT00000094176 (HK2)
B Cell	ENSGALT00000022505 (PCYOX1)	ENSGALT00000040525 (SNRPGP15)
B Cell	ENSGALT00000029510 (OGDH)	ENSGALT00000093024 (ENSGALG00000047157)
B Cell	ENSGALT00000094484 (OGDH)	ENSGALT00000093024 (ENSGALG00000047157)
B Cell	ENSGALT00000000949 (SCMH1)	ENSGALT00000083144 (CTPS1)
B Cell	ENSGALT00000044183 (ENSGALG00000029066)	ENSGALT00000073836 (YTHDF2)
B Cell	ENSGALT00000049065 (ENSGALG00000037052)	ENSGALT00000005281 (EIF3I)
B Cell	ENSGALT00000005575 (RBBP4)	ENSGALT00000097257 (ZBTB8OS)
B Cell	ENSGALT00000093495 (RBBP4)	ENSGALT00000097257 (ZBTB8OS)
B Cell	ENSGALT00000090762 (AZIN2)	ENSGALT00000005690 (AK2)
B Cell	ENSGALT00000006375 (LYPLA2)	ENSGALT00000107700 (GALE)
B Cell	ENSGALT00000090942 (ENSGALG00000052196)	ENSGALT00000094228 (ENSGALG00000051101)
B Cell	ENSGALT00000100565 (SLC25A44)	ENSGALT00000094228 (ENSGALG00000051101)
B Cell	ENSGALT00000100295 (NNF1)	ENSGALT00000094228 (ENSGALG00000051101)
B Cell	ENSGALT00000051767 (BGLAP)	ENSGALT00000094228 (ENSGALG00000051101)
B Cell	ENSGALT00000056013 (DPAGT1)	ENSGALT00000076907 (C2CD2L)
B Cell	ENSGALT00000086666 (ENSGALG00000045705)	ENSGALT00000074039 (HMBS)
B Cell	ENSGALT00000082329 (HYLS1)	ENSGALT00000041115 (RPUSD4)
B Cell	ENSGALT00000046807 (SRPRA)	ENSGALT00000084815 (FOXRED1)
B Cell	ENSGALT00000002366 (ACAD8)	ENSGALT00000089258 (THYN1)
B Cell	ENSGALT00000089428 (ENSGALG00000044002)	ENSGALT00000040801 (PDZD3)
B Cell	ENSGALT00000012488 (TRAPPC4)	ENSGALT00000012476 (ENSGALG00000007699)
B Cell	ENSGALT00000103144 (PIH1D2)	ENSGALT00000012801 (ENSGALG00000007882)
B Cell	ENSGALT00000087056 (NAXE)	ENSGALT00000102130 (GPATCH4)
B Cell	ENSGALT00000106295 (LAMTOR2)	ENSGALT00000072558 (UBQLN4)
B Cell	ENSGALT00000067623 (LAMTOR2)	ENSGALT00000072558 (UBQLN4)
B Cell	ENSGALT00000050437 (ENSGALG00000037441)	ENSGALT00000102946 (ENSGALG00000041435)
B Cell	ENSGALT00000004270 (CHRNB2)	ENSGALT00000063528 (UBE2Q1)
B Cell	ENSGALT00000045737 (SNAPIN)	ENSGALT00000086502 (ILF2)
B Cell	ENSGALT00000056011 (NDUFS2)	ENSGALT00000092700 (ENSGALG00000052689)
B Cell	ENSGALT00000099192 (SYPL2)	ENSGALT00000074807 (PSMA5)
B Cell	ENSGALT00000094982 (ENSGALG00000053036)	ENSGALT00000045498 (ENSGALG00000028346)
B Cell	ENSGALT00000000190 (SNRPE)	ENSGALT00000094313 (MTCH1)
B Cell	ENSGALT00000001686 (PFKFB2)	ENSGALT00000064315 (YOD1)
B Cell	ENSGALT00000002093 (TRAF3IP3)	ENSGALT00000045853 (ADORA3)
B Cell	ENSGALT00000002207 (ATP5PB)	ENSGALT00000053742 (WDR77)
B Cell	ENSGALT00000002368 (MOV10)	ENSGALT00000002385 (RHOC)
B Cell	ENSGALT00000002807 (MAGI3)	ENSGALT00000002857 (PHTF1)
B Cell	ENSGALT00000045280 (DCLRE1B)	ENSGALT00000057570 (AP4B1)
B Cell	ENSGALT00000049972 (TOMM6)	ENSGALT00000091367 (USP49)
B Cell	ENSGALT00000005478 (CNP)	ENSGALT00000075442 (DNAJC7)
B Cell	ENSGALT00000044950 (NKIRAS2)	ENSGALT00000075442 (DNAJC7)
B Cell	ENSGALT00000005068 (MLX)	ENSGALT00000046721 (PSMC3IP)
B Cell	ENSGALT00000087871 (PSME3)	ENSGALT00000004706 (BECN1)
B Cell	ENSGALT00000001057 (APBA3)	ENSGALT00000045101 (MRPL54)
B Cell	ENSGALT00000102592 (MICOS13)	ENSGALT00000020974 (HSD11B1L)
B Cell	ENSGALT00000060660 (DAZAP1)	ENSGALT00000097870 (ENSGALG00000040182)
B Cell	ENSGALT00000107845 (FCHO1)	ENSGALT00000081456 (JAK3)
B Cell	ENSGALT00000097275 (FKBP8)	ENSGALT00000076102 (KXD1)
B Cell	ENSGALT00000080507 (RAB3A)	ENSGALT00000090385 (MPV17L2)
B Cell	ENSGALT00000071359 (VRK2)	ENSGALT00000067764 (FANCL)
B Cell	ENSGALT00000043204 (ASB3)	ENSGALT00000013322 (CHAC2)
B Cell	ENSGALT00000057642 (CEP68)	ENSGALT00000083942 (RAB1B)
B Cell	ENSGALT00000033264 (SNX5)	ENSGALT00000076330 (MGME1)
B Cell	ENSGALT00000087173 (BPNT1)	ENSGALT00000089666 (IARS2)
B Cell	ENSGALT00000076325 (ESRRG)	ENSGALT00000093928 (ENSGALG00000041996)
B Cell	ENSGALT00000038479 (NSL1)	ENSGALT00000031933 (TATDN3)
B Cell	ENSGALT00000016003 (INTS7)	ENSGALT00000015990 (DTL)
B Cell	ENSGALT00000016247 (PRKCE)	ENSGALT00000105633 (ENSGALG00000047946)
B Cell	ENSGALT00000016260 (RHOQ)	ENSGALT00000067583 (PIGF)
B Cell	ENSGALT00000016762 (ENSGALG00000010303)	ENSGALT00000106840 (MAD2L1BP)
B Cell	ENSGALT00000017183 (EIF2AK2)	ENSGALT00000064824 (GPATCH11)
B Cell	ENSGALT00000097478 (CEBPZOS)	ENSGALT00000066488 (CEBPZ)
B Cell	ENSGALT00000101864 (ENSGALG00000054084)	ENSGALT00000017370 (DESI2)
B Cell	ENSGALT00000022610 (B3GALNT2)	ENSGALT00000022606 (ENSGALG00000013950)
B Cell	ENSGALT00000052694 (PHF10)	ENSGALT00000018251 (C3H6orf120)
B Cell	ENSGALT00000019010 (TCP1)	ENSGALT00000019060 (ACAT2)
B Cell	ENSGALT00000097909 (TMEM181)	ENSGALT00000099419 (DYNLT1)
B Cell	ENSGALT00000067131 (ENSGALG00000038188)	ENSGALT00000097646 (AKAP7)
B Cell	ENSGALT00000062531 (FAM184A)	ENSGALT00000090776 (ENSGALG00000048854)
B Cell	ENSGALT00000024014 (MCM9)	ENSGALT00000073491 (ASF1A)
B Cell	ENSGALT00000024100 (ZUP1)	ENSGALT00000024093 (KPNA5)
B Cell	ENSGALT00000103924 (ENSGALG00000053208)	ENSGALT00000064705 (RPF2)
B Cell	ENSGALT00000045345 (BORCS6)	ENSGALT00000025447 (PNRC1)
B Cell	ENSGALT00000101074 (ENSGALG00000053695)	ENSGALT00000060276 (KCNQ5)
B Cell	ENSGALT00000026434 (TRAPPC12)	ENSGALT00000026430 (TSSC1)
B Cell	ENSGALT00000107871 (ENSGALG00000049474)	ENSGALT00000026473 (MBOAT2)
B Cell	ENSGALT00000026572 (GEN1)	ENSGALT00000026569 (SMC6)
B Cell	ENSGALT00000026714 (HADHB)	ENSGALT00000026684 (HADHA)
B Cell	ENSGALT00000060697 (IMP3)	ENSGALT00000026970 (PLA2G7)
B Cell	ENSGALT00000073056 (FARSA)	ENSGALT00000067189 (CALR)
B Cell	ENSGALT00000092669 (ENSGALG00000038666)	ENSGALT00000081607 (UBL5)
B Cell	ENSGALT00000073335 (ATP13A1)	ENSGALT00000060969 (MVB12A)
B Cell	ENSGALT00000098366 (ENSGALG00000048625)	ENSGALT00000100976 (ENSGALG00000054294)
B Cell	ENSGALT00000082545 (NFKBIB)	ENSGALT00000047004 (SIRT2)
B Cell	ENSGALT00000057396 (TGFB1)	ENSGALT00000080667 (ENSGALG00000032223)
B Cell	ENSGALT00000104343 (SAE1)	ENSGALT00000100677 (ENSGALG00000049505)
B Cell	ENSGALT00000082408 (MARS)	ENSGALT00000050399 (ENSGALG00000031518)
B Cell	ENSGALT00000047125 (MARS)	ENSGALT00000050399 (ENSGALG00000031518)
B Cell	ENSGALT00000105145 (ENSGALG00000047565)	ENSGALT00000103066 (ENSGALG00000053973)
B Cell	ENSGALT00000052009 (CSAD)	ENSGALT00000086793 (ZNF740)
B Cell	ENSGALT00000058105 (HNRNPA1)	ENSGALT00000093204 (NFE2)
B Cell	ENSGALT00000050506 (HNRNPA1)	ENSGALT00000093204 (NFE2)
B Cell	ENSGALT00000006376 (AIFM1)	ENSGALT00000006401 (MARS2)
B Cell	ENSGALT00000074919 (ZDHHC9)	ENSGALT00000040562 (ENSGALG00000024039)
B Cell	ENSGALT00000007959 (TIMM8A)	ENSGALT00000007977 (ENSGALG00000004975)
B Cell	ENSGALT00000009976 (SLC9A6)	ENSGALT00000043721 (MMGT1)
B Cell	ENSGALT00000080145 (NRK)	ENSGALT00000107288 (ENSGALG00000051675)
B Cell	ENSGALT00000014591 (NRK)	ENSGALT00000107288 (ENSGALG00000051675)
B Cell	ENSGALT00000014910 (IDS)	ENSGALT00000088976 (ENSGALG00000029286)
B Cell	ENSGALT00000015372 (ETFDH)	ENSGALT00000015382 (PPID)
B Cell	ENSGALT00000047010 (RAPGEF2)	ENSGALT00000093685 (ENSGALG00000050541)
B Cell	ENSGALT00000015423 (RAPGEF2)	ENSGALT00000093685 (ENSGALG00000050541)
B Cell	ENSGALT00000104517 (ENSGALG00000048950)	ENSGALT00000016223 (ZNF827)
B Cell	ENSGALT00000087558 (MAB21L2)	ENSGALT00000056918 (LRBA)
B Cell	ENSGALT00000107607 (SCLT1)	ENSGALT00000016460 (CDKL2)
B Cell	ENSGALT00000098797 (SCLT1)	ENSGALT00000016460 (CDKL2)
B Cell	ENSGALT00000016820 (CNOT6L)	ENSGALT00000092541 (MRPL1)
B Cell	ENSGALT00000068504 (ENSGALG00000042001)	ENSGALT00000051420 (PYURF)
B Cell	ENSGALT00000032215 (CENPU)	ENSGALT00000038264 (PRIMPOL)
B Cell	ENSGALT00000100963 (CASP3)	ENSGALT00000038264 (PRIMPOL)
B Cell	ENSGALT00000095180 (RWDD4)	ENSGALT00000017333 (TRAPPC11)
B Cell	ENSGALT00000038016 (HNRNPDL)	ENSGALT00000057256 (ENOPH1)
B Cell	ENSGALT00000047514 (HNRNPDL)	ENSGALT00000057256 (ENOPH1)
B Cell	ENSGALT00000068418 (HNRNPDL)	ENSGALT00000057256 (ENOPH1)
B Cell	ENSGALT00000038003 (MRPS18C)	ENSGALT00000018281 (FAM175A)
B Cell	ENSGALT00000101063 (IGFBP7)	ENSGALT00000037965 (POLR2B)
B Cell	ENSGALT00000093913 (ENSGALG00000053080)	ENSGALT00000037951 (HOPX)
B Cell	ENSGALT00000101176 (ENSGALG00000053080)	ENSGALT00000037951 (HOPX)
B Cell	ENSGALT00000023118 (RFC1)	ENSGALT00000022768 (ENSGALG00000049347)
B Cell	ENSGALT00000056296 (FAM184B)	ENSGALT00000091312 (MED28)
B Cell	ENSGALT00000088776 (ENSGALG00000044501)	ENSGALT00000073493 (ENSGALG00000036547)
B Cell	ENSGALT00000067449 (ENSGALG00000040291)	ENSGALT00000102626 (ENSGALG00000054913)
B Cell	ENSGALT00000069369 (DCTN1)	ENSGALT00000052568 (IDH3B)
B Cell	ENSGALT00000082932 (NOP56)	ENSGALT00000052568 (IDH3B)
B Cell	ENSGALT00000079016 (RAD9A)	ENSGALT00000051728 (PPP1CA)
B Cell	ENSGALT00000073888 (TMEM138)	ENSGALT00000089662 (CYB561A3)
B Cell	ENSGALT00000086995 (TMEM138)	ENSGALT00000089662 (CYB561A3)
B Cell	ENSGALT00000050879 (SDHAF2)	ENSGALT00000071357 (CPSF7)
B Cell	ENSGALT00000077591 (ENSGALG00000034939)	ENSGALT00000069733 (AIP)
B Cell	ENSGALT00000071261 (PDDC1)	ENSGALT00000086673 (NLRP3)
B Cell	ENSGALT00000049686 (C15orf62)	ENSGALT00000061124 (DNAJC17)
B Cell	ENSGALT00000006309 (PRMT3)	ENSGALT00000107755 (ENSGALG00000047154)
B Cell	ENSGALT00000019813 (ELP4)	ENSGALT00000031814 (IMMP1L)
B Cell	ENSGALT00000019782 (EIF3M)	ENSGALT00000075291 (ENSGALG00000012103)
B Cell	ENSGALT00000054383 (CALCA)	ENSGALT00000009745 (CYP2R1)
B Cell	ENSGALT00000009761 (CALCA)	ENSGALT00000009745 (CYP2R1)
B Cell	ENSGALT00000101294 (TMEM86A)	ENSGALT00000099876 (ENSGALG00000054893)
B Cell	ENSGALT00000032673 (SLC43A3)	ENSGALT00000088649 (PGR2/3)
B Cell	ENSGALT00000013143 (CELF1)	ENSGALT00000013133 (PTPMT1)
B Cell	ENSGALT00000013368 (ACP2)	ENSGALT00000013377 (DDB2)
B Cell	ENSGALT00000045646 (CHAC1)	ENSGALT00000107557 (INO80)
B Cell	ENSGALT00000013997 (RTF1)	ENSGALT00000013981 (NDUFAF1)
B Cell	ENSGALT00000102215 (ENSGALG00000054613)	ENSGALT00000102206 (RAD51B)
B Cell	ENSGALT00000015501 (ARG2)	ENSGALT00000015509 (VTI1B)
B Cell	ENSGALT00000016576 (COQ6)	ENSGALT00000016585 (ENTPD5)
B Cell	ENSGALT00000037710 (TTLL5)	ENSGALT00000081527 (ENSGALG00000034354)
B Cell	ENSGALT00000089352 (TTLL5)	ENSGALT00000081527 (ENSGALG00000034354)
B Cell	ENSGALT00000055042 (SLIRP)	ENSGALT00000017099 (SNW1)
B Cell	ENSGALT00000061833 (SLIRP)	ENSGALT00000017099 (SNW1)
B Cell	ENSGALT00000102633 (ADCK1)	ENSGALT00000017099 (SNW1)
B Cell	ENSGALT00000017538 (CPSF2)	ENSGALT00000037601 (NDUFB1)
B Cell	ENSGALT00000101237 (GSKIP)	ENSGALT00000066952 (ATG2B)
B Cell	ENSGALT00000057576 (BTBD6)	ENSGALT00000019132 (BRF1)
B Cell	ENSGALT00000079178 (EXOC5)	ENSGALT00000019765 (AP5M1)
B Cell	ENSGALT00000045308 (Metazoa_SRP)	ENSGALT00000019972 (RPS29)
B Cell	ENSGALT00000032445 (ENSGALG00000020342)	ENSGALT00000020196 (PYGL)
B Cell	ENSGALT00000020371 (SOUL)	ENSGALT00000057113 (FANCM)
B Cell	ENSGALT00000070716 (FKBP3)	ENSGALT00000057113 (FANCM)
B Cell	ENSGALT00000078099 (ENSGALG00000040737)	ENSGALT00000071346 (ENSGALG00000043130)
B Cell	ENSGALT00000052751 (ENSGALG00000040055)	ENSGALT00000071346 (ENSGALG00000043130)
B Cell	ENSGALT00000103622 (ENSGALG00000040737)	ENSGALT00000071346 (ENSGALG00000043130)
B Cell	ENSGALT00000084769 (ENSGALG00000031497)	ENSGALT00000071346 (ENSGALG00000043130)
B Cell	ENSGALT00000003306 (PARG)	ENSGALT00000003257 (ENSGALG00000002089)
B Cell	ENSGALT00000004372 (DNAJC12)	ENSGALT00000004359 (SIRT1)
B Cell	ENSGALT00000089611 (ASCC1)	ENSGALT00000007029 (ANAPC16)
B Cell	ENSGALT00000007929 (POLR3A)	ENSGALT00000072914 (RPS24)
B Cell	ENSGALT00000052471 (AP3M1)	ENSGALT00000093117 (ENSGALG00000054579)
B Cell	ENSGALT00000012071 (COX15)	ENSGALT00000046257 (CUTC)
B Cell	ENSGALT00000051958 (RRP12)	ENSGALT00000039466 (PGAM1)
B Cell	ENSGALT00000062430 (POLL)	ENSGALT00000012535 (DPCD)
B Cell	ENSGALT00000085724 (POLL)	ENSGALT00000012535 (DPCD)
B Cell	ENSGALT00000091708 (POLL)	ENSGALT00000012535 (DPCD)
B Cell	ENSGALT00000013413 (TAF5)	ENSGALT00000051809 (USMG5)
B Cell	ENSGALT00000103201 (SFR1)	ENSGALT00000082951 (ENSGALG00000036896)
B Cell	ENSGALT00000107684 (PDCD4)	ENSGALT00000057879 (BBIP1)
B Cell	ENSGALT00000055818 (PDCD4)	ENSGALT00000057879 (BBIP1)
B Cell	ENSGALT00000090690 (ENSGALG00000049429)	ENSGALT00000015921 (CLRN3)
B Cell	ENSGALT00000101349 (ENSGALG00000049429)	ENSGALT00000015921 (CLRN3)
B Cell	ENSGALT00000098035 (ENSGALG00000049429)	ENSGALT00000015921 (CLRN3)
B Cell	ENSGALT00000082301 (ALDH18A1)	ENSGALT00000103444 (ENSGALG00000051783)
B Cell	ENSGALT00000054973 (ALDH18A1)	ENSGALT00000103444 (ENSGALG00000051783)
B Cell	ENSGALT00000060438 (OSGEPL1)	ENSGALT00000075877 (PMS1)
B Cell	ENSGALT00000013388 (NIF3L1)	ENSGALT00000013390 (PPIL3)
B Cell	ENSGALT00000014220 (ENSGALG00000008738)	ENSGALT00000080101 (CYP20A1)
B Cell	ENSGALT00000023090 (CIR1)	ENSGALT00000067425 (SCRN3)
B Cell	ENSGALT00000073063 (SLC25A12)	ENSGALT00000015508 (HAT1)
B Cell	ENSGALT00000015749 (METTL5)	ENSGALT00000015751 (SSB)
B Cell	ENSGALT00000017711 (ABCB11)	ENSGALT00000017674 (DHRS9)
B Cell	ENSGALT00000018510 (CNPPD1)	ENSGALT00000077523 (ZFAND2B)
B Cell	ENSGALT00000087444 (AAMP)	ENSGALT00000018675 (ARPC2)
B Cell	ENSGALT00000042561 (ENSGALG00000025648)	ENSGALT00000019030 (CLASP1)
B Cell	ENSGALT00000083500 (PARP9)	ENSGALT00000096667 (FAIM)
B Cell	ENSGALT00000090492 (PARP9)	ENSGALT00000096667 (FAIM)
B Cell	ENSGALT00000020527 (TANC1)	ENSGALT00000020533 (WDSUB1)
B Cell	ENSGALT00000003258 (GPSM2)	ENSGALT00000003286 (CLCC1)
B Cell	ENSGALT00000096288 (ENSGALG00000050838)	ENSGALT00000004826 (PRDX6)
B Cell	ENSGALT00000099000 (ENSGALG00000050838)	ENSGALT00000004826 (PRDX6)
B Cell	ENSGALT00000073277 (SCYL3)	ENSGALT00000072136 (C1orf112)
B Cell	ENSGALT00000056245 (METTL18)	ENSGALT00000072136 (C1orf112)
B Cell	ENSGALT00000006255 (ACBD6)	ENSGALT00000096523 (ENSGALG00000047961)
B Cell	ENSGALT00000052097 (MRPS14)	ENSGALT00000007248 (CACYBP)
B Cell	ENSGALT00000053904 (TPR)	ENSGALT00000008146 (C8H1orf27)
B Cell	ENSGALT00000008185 (TPR)	ENSGALT00000008146 (C8H1orf27)
B Cell	ENSGALT00000016612 (UROD)	ENSGALT00000016610 (ENSGALG00000010217)
B Cell	ENSGALT00000038158 (MRPL37)	ENSGALT00000017496 (ENSGALG00000010758)
B Cell	ENSGALT00000053156 (FGGY)	ENSGALT00000038039 (JUN)
B Cell	ENSGALT00000055523 (FGGY)	ENSGALT00000038039 (JUN)
B Cell	ENSGALT00000095224 (ENSGALG00000054726)	ENSGALT00000096462 (ENSGALG00000050045)
B Cell	ENSGALT00000090404 (ENSGALG00000054726)	ENSGALT00000096462 (ENSGALG00000050045)
B Cell	ENSGALT00000017909 (EFCAB7)	ENSGALT00000044324 (ITGB3BP)
B Cell	ENSGALT00000063906 (GIGYF2)	ENSGALT00000002259 (KCNJ13)
B Cell	ENSGALT00000106565 (ENSGALG00000020986)	ENSGALT00000093033 (ENSGALG00000050793)
B Cell	ENSGALT00000040843 (MOGAT1)	ENSGALT00000008412 (FARSB)
B Cell	ENSGALT00000004364 (ATP1B3)	ENSGALT00000104323 (TFDP2)
B Cell	ENSGALT00000015715 (LXN)	ENSGALT00000015688 (GFM1)
B Cell	ENSGALT00000062124 (P2RY13)	ENSGALT00000016895 (MED12L)
B Cell	ENSGALT00000080536 (GPR171)	ENSGALT00000016895 (MED12L)
B Cell	ENSGALT00000064199 (CP)	ENSGALT00000082756 (HPS3)
B Cell	ENSGALT00000095913 (YF5)	ENSGALT00000092163 (ENSGALG00000051188)
B Cell	ENSGALT00000102537 (ENSGALG00000047508)	ENSGALT00000087061 (ENSGALG00000044984)
B Cell	ENSGALT00000103964 (ENSGALG00000053365)	ENSGALT00000104290 (ENSGALG00000054322)
B Cell	ENSGALT00000100007 (MED11)	ENSGALT00000098531 (ENSGALG00000049559)
B Cell	ENSGALT00000092795 (COLGALT1)	ENSGALT00000107074 (PRKCSH)
B Cell	ENSGALT00000053568 (MT-CO1)	ENSGALT00000056830 (ENSGALG00000033462)
B Cell	ENSGALT00000099937 (ENSGALG00000047839)	ENSGALT00000096825 (ENSGALG00000048542)
B Cell	ENSGALT00000056025 (ENSGALG00000030707)	ENSGALT00000101672 (ENSGALG00000047682)
B Cell	ENSGALT00000086152 (ENSGALG00000045131)	ENSGALT00000074031 (ENSGALG00000038064)
B Cell	ENSGALT00000091299 (ENSGALG00000048432)	ENSGALT00000072373 (ENSGALG00000034488)
B Cell	ENSGALT00000052745 (ENSGALG00000035780)	ENSGALT00000099413 (ENSGALG00000049534)
B Cell	ENSGALT00000003796 (GBA2)	ENSGALT00000088738 (RGP1)
B Cell	ENSGALT00000005609 (SKP2)	ENSGALT00000021822 (LMBRD2)
B Cell	ENSGALT00000023719 (SKIV2L2)	ENSGALT00000023700 (DHX29)
B Cell	ENSGALT00000071193 (SHLD3)	ENSGALT00000023814 (TRIM23)
B Cell	ENSGALT00000023818 (TRAPPC13)	ENSGALT00000023814 (TRIM23)
B Cell	ENSGALT00000089674 (TRAPPC13)	ENSGALT00000023814 (TRIM23)
B Cell	ENSGALT00000038562 (F2RL2)	ENSGALT00000049094 (IQGAP2)
B Cell	ENSGALT00000023330 (CDC37L1)	ENSGALT00000070268 (AK3)
B Cell	ENSGALT00000028137 (OSTF1)	ENSGALT00000077373 (NMRK1)
B Cell	ENSGALT00000037896 (REEP5)	ENSGALT00000000294 (SRP19)
B Cell	ENSGALT00000003696 (ATG12)	ENSGALT00000003691 (AP3S1)
B Cell	ENSGALT00000028259 (ENSGALG00000017558)	ENSGALT00000042981 (ENSGALG00000029118)
B Cell	ENSGALT00000106415 (ENSGALG00000017558)	ENSGALT00000042981 (ENSGALG00000029118)
Bursa	ENSGALT00000105029 (CLC2DL3)	ENSGALT00000104150 (ENSGALG00000048857)
Bursa	ENSGALT00000013282 (GDI1)	ENSGALT00000096214 (TASOR2)
Bursa	ENSGALT00000105830 (ENSGALG00000050475)	ENSGALT00000101201 (ENSGALG00000052368)
Bursa	ENSGALT00000010717 (TMEM243)	ENSGALT00000075153 (DMTF1)
Bursa	ENSGALT00000070713 (ENSGALG00000038546)	ENSGALT00000083648 (RSBN1L)
Bursa	ENSGALT00000013473 (PMPCB)	ENSGALT00000013428 (DNAJC2)
Bursa	ENSGALT00000013186 (RINT1)	ENSGALT00000104579 (EFCAB10)
Bursa	ENSGALT00000013062 (HBP1)	ENSGALT00000068162 (COG5)
Bursa	ENSGALT00000013029 (ENSGALG00000008032)	ENSGALT00000068162 (COG5)
Bursa	ENSGALT00000039460 (DUS4L)	ENSGALT00000068162 (COG5)
Bursa	ENSGALT00000038864 (IMMP2L)	ENSGALT00000015449 (LRRN3)
Bursa	ENSGALT00000061912 (ENSGALG00000034552)	ENSGALT00000070654 (E2F7)
Bursa	ENSGALT00000018475 (SNAPC3)	ENSGALT00000054741 (TMCC3)
Bursa	ENSGALT00000019187 (ENSGALG00000011747)	ENSGALT00000058977 (H2A-VI)
Bursa	ENSGALT00000102658 (ENSGALG00000048795)	ENSGALT00000058977 (H2A-VI)
Bursa	ENSGALT00000081149 (ENSGALG00000034631)	ENSGALT00000079743 (HIST1H103)
Bursa	ENSGALT00000042655 (HIST1H3H)	ENSGALT00000098465 (ENSGALG00000046904)
Bursa	ENSGALT00000020100 (ANKRD54)	ENSGALT00000020091 (EIF3L)
Bursa	ENSGALT00000088334 (GLT8D2)	ENSGALT00000052099 (TDG)
Bursa	ENSGALT00000068252 (C1H12ORF73)	ENSGALT00000052099 (TDG)
Bursa	ENSGALT00000094657 (ENSGALG00000053936)	ENSGALT00000021284 (BID)
Bursa	ENSGALT00000093471 (ENSGALG00000053936)	ENSGALT00000021284 (BID)
Bursa	ENSGALT00000085898 (CALD1)	ENSGALT00000102533 (ENSGALG00000051034)
Bursa	ENSGALT00000070978 (ETFRF1)	ENSGALT00000063299 (KRAS)
Bursa	ENSGALT00000059512 (ENSGALG00000014126)	ENSGALT00000084080 (CYB5R1)
Bursa	ENSGALT00000030515 (ENSGALG00000019262)	ENSGALT00000084080 (CYB5R1)
Bursa	ENSGALT00000097946 (TSPO)	ENSGALT00000069414 (MCAT)
Bursa	ENSGALT00000094503 (CCDC91)	ENSGALT00000094854 (ENSGALG00000051865)
Bursa	ENSGALT00000050393 (CCDC91)	ENSGALT00000094854 (ENSGALG00000051865)
Bursa	ENSGALT00000023289 (FAM162A)	ENSGALT00000084532 (CCDC58)
Bursa	ENSGALT00000079058 (NEPRO)	ENSGALT00000085162 (TAF13)
Bursa	ENSGALT00000024500 (NEPRO)	ENSGALT00000085162 (TAF13)
Bursa	ENSGALT00000091824 (NEPRO)	ENSGALT00000085162 (TAF13)
Bursa	ENSGALT00000024577 (NME7)	ENSGALT00000036926 (ATP1B1)
Bursa	ENSGALT00000100800 (ENSGALG00000052183)	ENSGALT00000083617 (RPL24)
Bursa	ENSGALT00000094520 (HHLA2)	ENSGALT00000024781 (IFT57)
Bursa	ENSGALT00000024861 (ARL13B)	ENSGALT00000024862 (STX19)
Bursa	ENSGALT00000101025 (ENSGALG00000024077)	ENSGALT00000070424 (MINA)
Bursa	ENSGALT00000095806 (ENSGALG00000047821)	ENSGALT00000024926 (ZFP92)
Bursa	ENSGALT00000068147 (JAM2)	ENSGALT00000063486 (ATP5PF)
Bursa	ENSGALT00000030337 (GATD3A)	ENSGALT00000092229 (ENSGALG00000046714)
Bursa	ENSGALT00000054938 (CASK)	ENSGALT00000026167 (GPR34)
Bursa	ENSGALT00000104408 (CASK)	ENSGALT00000026167 (GPR34)
Bursa	ENSGALT00000091460 (CASK)	ENSGALT00000026167 (GPR34)
Bursa	ENSGALT00000064964 (KLHL15)	ENSGALT00000026357 (EIF2S3)
Bursa	ENSGALT00000107403 (TRAPPC2)	ENSGALT00000026762 (RAB9A)
Bursa	ENSGALT00000030243 (ENSGALG00000016760)	ENSGALT00000027060 (MITD1)
Bursa	ENSGALT00000063432 (ENSGALG00000016760)	ENSGALT00000027060 (MITD1)
Bursa	ENSGALT00000027117 (C1H2ORF49)	ENSGALT00000061172 (FHL2)
Bursa	ENSGALT00000100687 (COL4A2)	ENSGALT00000053661 (COL4A1)
Bursa	ENSGALT00000049451 (ING1)	ENSGALT00000093925 (CARS2)
Bursa	ENSGALT00000027271 (GPR183)	ENSGALT00000058077 (UBAC2)
Bursa	ENSGALT00000036524 (GPR18)	ENSGALT00000058077 (UBAC2)
Bursa	ENSGALT00000027397 (WBP4)	ENSGALT00000027391 (ELF1)
Bursa	ENSGALT00000027426 (GTF2F2)	ENSGALT00000027428 (KCTD4)
Bursa	ENSGALT00000036484 (RB1)	ENSGALT00000027460 (LPAR6)
Bursa	ENSGALT00000107323 (RB1)	ENSGALT00000027460 (LPAR6)
Bursa	ENSGALT00000096429 (RB1)	ENSGALT00000027460 (LPAR6)
Bursa	ENSGALT00000027510 (VPS36)	ENSGALT00000027509 (CKAP2)
Bursa	ENSGALT00000036465 (SUPT20H)	ENSGALT00000061853 (EXOSC8)
Bursa	ENSGALT00000090221 (MAB21L1)	ENSGALT00000107478 (NBEA)
Bursa	ENSGALT00000104547 (ENSGALG00000053592)	ENSGALT00000027571 (PDS5B)
Bursa	ENSGALT00000027575 (ENSGALG00000017072)	ENSGALT00000027576 (BRCA2)
Bursa	ENSGALT00000027620 (MTIF3)	ENSGALT00000027621 (GTF3A)
Bursa	ENSGALT00000092350 (MTIF3)	ENSGALT00000027621 (GTF3A)
Bursa	ENSGALT00000091286 (MTIF3)	ENSGALT00000027621 (GTF3A)
Bursa	ENSGALT00000099250 (ENSGALG00000017220)	ENSGALT00000060059 (ENSGALG00000040433)
Bursa	ENSGALT00000101883 (ENSGALG00000017220)	ENSGALT00000060059 (ENSGALG00000040433)
Bursa	ENSGALT00000027834 (ENSGALG00000017220)	ENSGALT00000060059 (ENSGALG00000040433)
Bursa	ENSGALT00000042575 (ENSGALG00000025662)	ENSGALT00000060059 (ENSGALG00000040433)
Bursa	ENSGALT00000042593 (ENSGALG00000025680)	ENSGALT00000060059 (ENSGALG00000040433)
Bursa	ENSGALT00000095300 (FAM168A)	ENSGALT00000086546 (ENSGALG00000044739)
Bursa	ENSGALT00000027995 (FAM168A)	ENSGALT00000086546 (ENSGALG00000044739)
Bursa	ENSGALT00000105587 (ENSGALG00000052767)	ENSGALT00000036373 (HBBA)
Bursa	ENSGALT00000091123 (ENSGALG00000047924)	ENSGALT00000098387 (ENSGALG00000038550)
Bursa	ENSGALT00000103620 (ENSGALG00000047924)	ENSGALT00000098387 (ENSGALG00000038550)
Bursa	ENSGALT00000104377 (NEO1)	ENSGALT00000095654 (ENSGALG00000055009)
Bursa	ENSGALT00000082543 (ENSGALG00000033780)	ENSGALT00000058852 (ITGB1BP3)
Bursa	ENSGALT00000051937 (ENSGALG00000033780)	ENSGALT00000058852 (ITGB1BP3)
Bursa	ENSGALT00000091589 (ENSGALG00000033780)	ENSGALT00000058852 (ITGB1BP3)
Bursa	ENSGALT00000097973 (ENSGALG00000033780)	ENSGALT00000058852 (ITGB1BP3)
Bursa	ENSGALT00000085495 (POLG)	ENSGALT00000010770 (FANCI)
Bursa	ENSGALT00000012093 (HACD3)	ENSGALT00000094572 (VWA9)
Bursa	ENSGALT00000012364 (DIS3L)	ENSGALT00000062194 (TIPIN)
Bursa	ENSGALT00000085779 (ENSGALG00000045045)	ENSGALT00000013516 (CIB4)
Bursa	ENSGALT00000074111 (CIAPIN1)	ENSGALT00000001797 (COQ9)
Bursa	ENSGALT00000101967 (NUDT21)	ENSGALT00000004848 (OGFOD1)
Bursa	ENSGALT00000004875 (NUDT21)	ENSGALT00000004848 (OGFOD1)
Bursa	ENSGALT00000005070 (FBXL8)	ENSGALT00000005064 (TRADD)
Bursa	ENSGALT00000106471 (DDX28)	ENSGALT00000005388 (DUS2)
Bursa	ENSGALT00000092066 (ENSGALG00000052008)	ENSGALT00000006090 (ADCY7)
Bursa	ENSGALT00000075864 (ITFG1)	ENSGALT00000006378 (PHKB)
Bursa	ENSGALT00000085464 (VPS35)	ENSGALT00000063938 (ORC6)
Bursa	ENSGALT00000097134 (FAAP24)	ENSGALT00000078637 (ENSGALG00000004814)
Bursa	ENSGALT00000007726 (GPATCH1)	ENSGALT00000007532 (SLC7A10)
Bursa	ENSGALT00000077917 (CEBPG)	ENSGALT00000007832 (PEPD)
Bursa	ENSGALT00000051074 (CEBPG)	ENSGALT00000007832 (PEPD)
Bursa	ENSGALT00000007911 (SS18L2)	ENSGALT00000076733 (KIAA0355)
Bursa	ENSGALT00000008632 (WWOX)	ENSGALT00000043755 (MAF)
Bursa	ENSGALT00000000702 (ZNF276)	ENSGALT00000038833 (VPS9D1)
Bursa	ENSGALT00000044355 (DEF8)	ENSGALT00000000728 (DBNDD1)
Bursa	ENSGALT00000000910 (UTP4)	ENSGALT00000058298 (CHTF8)
Bursa	ENSGALT00000059294 (ENSGALG00000040713)	ENSGALT00000098624 (PDF)
Bursa	ENSGALT00000001334 (KARS)	ENSGALT00000001325 (TERF2IP)
Bursa	ENSGALT00000047563 (KARS)	ENSGALT00000096189 (GABARAPL2)
Bursa	ENSGALT00000003917 (RNF123)	ENSGALT00000105582 (AMIGO3)
Bursa	ENSGALT00000005931 (EMC3)	ENSGALT00000005906 (FANCD2)
Bursa	ENSGALT00000069748 (PPM1M)	ENSGALT00000006336 (TWF2)
Bursa	ENSGALT00000007462 (IPPK)	ENSGALT00000007467 (CENPP)
Bursa	ENSGALT00000007480 (ECM2)	ENSGALT00000007467 (CENPP)
Bursa	ENSGALT00000007519 (ASPN)	ENSGALT00000007467 (CENPP)
Bursa	ENSGALT00000045074 (OGN)	ENSGALT00000007467 (CENPP)
Bursa	ENSGALT00000007983 (TSEN2)	ENSGALT00000043832 (MKRN2OS)
Bursa	ENSGALT00000007996 (MKRN2)	ENSGALT00000055408 (RAF1)
Bursa	ENSGALT00000010655 (MTMR14)	ENSGALT00000106180 (LHFPL4)
Bursa	ENSGALT00000095289 (MTMR14)	ENSGALT00000106180 (LHFPL4)
Bursa	ENSGALT00000011252 (ENSGALG00000006944)	ENSGALT00000011237 (P4HTM)
Bursa	ENSGALT00000044814 (SLC25A20)	ENSGALT00000044557 (ARIH2)
Bursa	ENSGALT00000013716 (CAND2)	ENSGALT00000084738 (SEC13)
Bursa	ENSGALT00000073565 (IFT122)	ENSGALT00000096664 (MBD4)
Bursa	ENSGALT00000082836 (ENSGALG00000029346)	ENSGALT00000064754 (ZMAT2)
Bursa	ENSGALT00000004056 (ENSGALG00000002570)	ENSGALT00000004047 (ARAP3)
Bursa	ENSGALT00000051133 (ENSGALG00000042423)	ENSGALT00000004015 (PCDH12)
Bursa	ENSGALT00000044150 (INSYN2B)	ENSGALT00000003239 (DOCK2)
Bursa	ENSGALT00000047574 (SLU7)	ENSGALT00000002291 (PTTG2)
Bursa	ENSGALT00000050464 (SLU7)	ENSGALT00000002291 (PTTG2)
Bursa	ENSGALT00000005307 (ENSGALG00000003355)	ENSGALT00000005313 (ARL10)
Bursa	ENSGALT00000089325 (THOC3)	ENSGALT00000061660 (SIMC1)
Bursa	ENSGALT00000006272 (GEMIN5)	ENSGALT00000006244 (MRPL22)
Bursa	ENSGALT00000063933 (HNRNPH2)	ENSGALT00000009585 (DGUOK)
Bursa	ENSGALT00000080575 (HNRNPH2)	ENSGALT00000009585 (DGUOK)
Bursa	ENSGALT00000088178 (HNRNPH2)	ENSGALT00000009585 (DGUOK)
Bursa	ENSGALT00000082236 (HNRNPH2)	ENSGALT00000009585 (DGUOK)
Bursa	ENSGALT00000095094 (ENSGALG00000034305)	ENSGALT00000107573 (ENSGALG00000047174)
Bursa	ENSGALT00000023235 (PHYKPL)	ENSGALT00000083027 (HNRNPAB)
Bursa	ENSGALT00000092081 (ENSGALG00000047414)	ENSGALT00000005479 (CCZ1)
Bursa	ENSGALT00000090731 (BRI3)	ENSGALT00000108306 (TECPR1)
Bursa	ENSGALT00000060524 (GPR146)	ENSGALT00000103266 (C7orf50)
Bursa	ENSGALT00000006456 (GPR146)	ENSGALT00000103266 (C7orf50)
Bursa	ENSGALT00000092653 (GPR146)	ENSGALT00000103266 (C7orf50)
Bursa	ENSGALT00000102216 (ENSGALG00000050332)	ENSGALT00000103266 (C7orf50)
Bursa	ENSGALT00000008614 (NARFL)	ENSGALT00000008668 (HAGHL)
Bursa	ENSGALT00000008778 (NDUFB10)	ENSGALT00000008816 (RPS2)
Bursa	ENSGALT00000008918 (TBL3)	ENSGALT00000008938 (ENSGALG00000005572)
Bursa	ENSGALT00000009864 (PLK1)	ENSGALT00000043152 (ERN2)
Bursa	ENSGALT00000010182 (KDM8)	ENSGALT00000010199 (NSMCE1)
Bursa	ENSGALT00000105945 (GNPTG)	ENSGALT00000010385 (TSR3)
Bursa	ENSGALT00000096336 (GNPTG)	ENSGALT00000010385 (TSR3)
Bursa	ENSGALT00000010394 (GNPTG)	ENSGALT00000010385 (TSR3)
Bursa	ENSGALT00000011412 (METTL9)	ENSGALT00000042629 (IGSF6)
Bursa	ENSGALT00000043053 (SNRNP25)	ENSGALT00000028385 (POLR3K)
Bursa	ENSGALT00000090507 (VASN)	ENSGALT00000080412 (CORO7)
Bursa	ENSGALT00000015164 (IFT140)	ENSGALT00000096436 (TMEM204)
Bursa	ENSGALT00000003152 (GPRC5B)	ENSGALT00000045802 (IQCK)
Bursa	ENSGALT00000091140 (GPRC5B)	ENSGALT00000045802 (IQCK)
Bursa	ENSGALT00000060965 (ENSGALG00000042810)	ENSGALT00000045802 (IQCK)
Bursa	ENSGALT00000029798 (ENSGALG00000002042)	ENSGALT00000045802 (IQCK)
Bursa	ENSGALT00000068361 (PI4KA)	ENSGALT00000063276 (SERPIND1)
Bursa	ENSGALT00000095976 (MRPL40)	ENSGALT00000077327 (HIRA)
Bursa	ENSGALT00000098425 (COMT)	ENSGALT00000107088 (TXNRD2)
Bursa	ENSGALT00000100516 (RANBP1)	ENSGALT00000003266 (TRMT2A)
Bursa	ENSGALT00000034743 (STX2)	ENSGALT00000050491 (ADGRD1)
Bursa	ENSGALT00000005160 (EIF2B1)	ENSGALT00000005224 (DDX55)
Bursa	ENSGALT00000007191 (ENSGALG00000004515)	ENSGALT00000086581 (VPS29)
Bursa	ENSGALT00000060434 (TCTN1)	ENSGALT00000106081 (HVCN1)
Bursa	ENSGALT00000009009 (SRRD)	ENSGALT00000008976 (HPS4)
Bursa	ENSGALT00000102863 (DTX1)	ENSGALT00000013239 (RASAL1)
Bursa	ENSGALT00000104621 (ENSGALG00000053730)	ENSGALT00000046723 (ENSGALG00000049208)
Bursa	ENSGALT00000097213 (ENSGALG00000048880)	ENSGALT00000046723 (ENSGALG00000049208)
Bursa	ENSGALT00000093088 (ENSGALG00000047380)	ENSGALT00000046723 (ENSGALG00000049208)
Bursa	ENSGALT00000097044 (ENSGALG00000050091)	ENSGALT00000046723 (ENSGALG00000049208)
Bursa	ENSGALT00000042868 (BG8)	ENSGALT00000060138 (TRIM7.2)
Bursa	ENSGALT00000095967 (ENSGALG00000046794)	ENSGALT00000060138 (TRIM7.2)
Bursa	ENSGALT00000075892 (KIFC1)	ENSGALT00000060138 (TRIM7.2)
Bursa	ENSGALT00000074567 (ZNF692)	ENSGALT00000060138 (TRIM7.2)
Bursa	ENSGALT00000098363 (ENSGALG00000050552)	ENSGALT00000073089 (CLIC3)
Bursa	ENSGALT00000014314 (RPL12)	ENSGALT00000014334 (LRSAM1)
Bursa	ENSGALT00000067722 (RPL12)	ENSGALT00000014334 (LRSAM1)
Bursa	ENSGALT00000007872 (TRUB2)	ENSGALT00000007881 (COQ4)
Bursa	ENSGALT00000054954 (ENSGALG00000042325)	ENSGALT00000007637 (C17H9orf16)
Bursa	ENSGALT00000039770 (SPTAN1)	ENSGALT00000007489 (WDR34)
Bursa	ENSGALT00000089974 (NTMT1)	ENSGALT00000108244 (ASB6)
Bursa	ENSGALT00000072855 (USP20)	ENSGALT00000006601 (C9orf78)
Bursa	ENSGALT00000005964 (POMT1)	ENSGALT00000005921 (UCK1)
Bursa	ENSGALT00000094669 (POMT1)	ENSGALT00000005921 (UCK1)
Bursa	ENSGALT00000087416 (RPL7A)	ENSGALT00000005076 (MED22)
Bursa	ENSGALT00000005036 (ENSGALG00000003175)	ENSGALT00000071842 (REXO4)
Bursa	ENSGALT00000002038 (MRRFP1)	ENSGALT00000044500 (RBM18)
Bursa	ENSGALT00000001858 (RABGAP1)	ENSGALT00000063306 (ZBTB26)
Bursa	ENSGALT00000001535 (SCAI)	ENSGALT00000057772 (RPL35)
Bursa	ENSGALT00000092995 (SCAI)	ENSGALT00000057772 (RPL35)
Bursa	ENSGALT00000103143 (SCAI)	ENSGALT00000057772 (RPL35)
Bursa	ENSGALT00000057653 (RABEPK)	ENSGALT00000001495 (PPP6C)
Bursa	ENSGALT00000051891 (RALGPS1)	ENSGALT00000001362 (ANGPTL2)
Bursa	ENSGALT00000001330 (RALGPS1)	ENSGALT00000001362 (ANGPTL2)
Bursa	ENSGALT00000084390 (ENSGALG00000024335)	ENSGALT00000041141 (ENSGALG00000050425)
Bursa	ENSGALT00000081425 (ADPRM)	ENSGALT00000091102 (SCO1)
Bursa	ENSGALT00000002182 (B3GNTL1)	ENSGALT00000039250 (TBCD)
Bursa	ENSGALT00000002308 (ZNF750)	ENSGALT00000002283 (TBCD)
Bursa	ENSGALT00000093480 (OGFOD3)	ENSGALT00000039218 (UTS2R)
Bursa	ENSGALT00000073781 (SRSF2)	ENSGALT00000002759 (METTL23)
Bursa	ENSGALT00000003814 (RECQL5)	ENSGALT00000003817 (SMIM5)
Bursa	ENSGALT00000004493 (DCXR)	ENSGALT00000053553 (RAC3)
Bursa	ENSGALT00000004723 (UTP18)	ENSGALT00000049823 (MBTD1)
Bursa	ENSGALT00000095937 (ENSGALG00000046212)	ENSGALT00000005570 (POLG2)
Bursa	ENSGALT00000006665 (ARSG)	ENSGALT00000006617 (SLC16A6)
Bursa	ENSGALT00000053808 (COG1)	ENSGALT00000073416 (FAM104A)
Bursa	ENSGALT00000076465 (COG1)	ENSGALT00000073416 (FAM104A)
Bursa	ENSGALT00000102346 (ENSGALG00000049911)	ENSGALT00000011710 (ALYREF)
Bursa	ENSGALT00000031388 (ENSGALG00000019761)	ENSGALT00000038263 (ACSF2)
Bursa	ENSGALT00000012890 (KCTD2)	ENSGALT00000084498 (ATP5PD)
Bursa	ENSGALT00000012920 (SLC16A5)	ENSGALT00000066580 (HN1)
Bursa	ENSGALT00000012930 (ARMC7)	ENSGALT00000066580 (HN1)
Bursa	ENSGALT00000080909 (MRPS7)	ENSGALT00000044481 (MIF4GD)
Bursa	ENSGALT00000085665 (MRPS7)	ENSGALT00000044481 (MIF4GD)
Bursa	ENSGALT00000083321 (ENSGALG00000052672)	ENSGALT00000073675 (ENSGALG00000033320)
Bursa	ENSGALT00000076507 (DDX25)	ENSGALT00000073675 (ENSGALG00000033320)
Bursa	ENSGALT00000053956 (ENSGALG00000037051)	ENSGALT00000073675 (ENSGALG00000033320)
Bursa	ENSGALT00000049551 (ENSGALG00000037051)	ENSGALT00000073675 (ENSGALG00000033320)
Bursa	ENSGALT00000048512 (ENSGALG00000037051)	ENSGALT00000073675 (ENSGALG00000033320)
Bursa	ENSGALT00000073554 (ENSGALG00000037051)	ENSGALT00000073675 (ENSGALG00000033320)
Bursa	ENSGALT00000080376 (ENSGALG00000037051)	ENSGALT00000073675 (ENSGALG00000033320)
Bursa	ENSGALT00000103112 (ENSGALG00000047563)	ENSGALT00000073675 (ENSGALG00000033320)
Bursa	ENSGALT00000102336 (ENSGALG00000001049)	ENSGALT00000107005 (MTMR4)
Bursa	ENSGALT00000108031 (ENSGALG00000001049)	ENSGALT00000107005 (MTMR4)
Bursa	ENSGALT00000002870 (LRWD1)	ENSGALT00000053454 (POLR2J)
Bursa	ENSGALT00000088357 (TMEM120A)	ENSGALT00000097118 (POR)
Bursa	ENSGALT00000003859 (CCT6A)	ENSGALT00000065653 (PSPH)
Bursa	ENSGALT00000003887 (ENSGALG00000002463)	ENSGALT00000003916 (PHKG1)
Bursa	ENSGALT00000004993 (SRR)	ENSGALT00000058580 (SMG6)
Bursa	ENSGALT00000007038 (TTC19)	ENSGALT00000039555 (ZSWIM7)
Bursa	ENSGALT00000007345 (P2RX5)	ENSGALT00000084902 (EMC6)
Bursa	ENSGALT00000008580 (ENSGALG00000005350)	ENSGALT00000008605 (CA4)
Bursa	ENSGALT00000008627 (ZNHIT3)	ENSGALT00000090994 (MYO19)
Bursa	ENSGALT00000050118 (EVI2A)	ENSGALT00000055292 (NF1)
Bursa	ENSGALT00000068634 (ENSGALG00000035589)	ENSGALT00000055292 (NF1)
Bursa	ENSGALT00000008974 (OMG)	ENSGALT00000055292 (NF1)
Bursa	ENSGALT00000009146 (TMEM97)	ENSGALT00000086153 (IFT20)
Bursa	ENSGALT00000008701 (JMJD4)	ENSGALT00000103352 (SNAP47)
Bursa	ENSGALT00000107452 (ENSGALG00000050097)	ENSGALT00000054981 (PRKAG2)
Bursa	ENSGALT00000065275 (CBX3)	ENSGALT00000090968 (HNRNPA2B1)
Bursa	ENSGALT00000081699 (METTL6)	ENSGALT00000065313 (EAF1)
Bursa	ENSGALT00000057417 (METTL6)	ENSGALT00000065313 (EAF1)
Bursa	ENSGALT00000098055 (ACKR4)	ENSGALT00000054111 (ACAD11)
Bursa	ENSGALT00000041883 (7SK)	ENSGALT00000061461 (TPK1)
Bursa	ENSGALT00000020778 (GFOD1)	ENSGALT00000102638 (ENSGALG00000047333)
Bursa	ENSGALT00000020801 (NEDD9)	ENSGALT00000031049 (C1orf145)
Bursa	ENSGALT00000102872 (NEDD9)	ENSGALT00000031049 (C1orf145)
Bursa	ENSGALT00000045583 (ENSGALG00000054420)	ENSGALT00000077586 (BPHL)
Bursa	ENSGALT00000091120 (PIGN)	ENSGALT00000061204 (RELCH)
Bursa	ENSGALT00000075665 (ATPSCKMT)	ENSGALT00000021286 (CCT5)
Bursa	ENSGALT00000046536 (FASTKD3)	ENSGALT00000079280 (MTRR)
Bursa	ENSGALT00000092899 (CCDC127)	ENSGALT00000021508 (SDHA)
Bursa	ENSGALT00000046850 (GABBR2)	ENSGALT00000097504 (ENSGALG00000054102)
Bursa	ENSGALT00000021913 (TEX10)	ENSGALT00000030979 (INVS)
Bursa	ENSGALT00000107024 (ENSGALG00000031167)	ENSGALT00000076291 (COPS5)
Bursa	ENSGALT00000046248 (TERF1)	ENSGALT00000047667 (SBSPON)
Bursa	ENSGALT00000069458 (E2F5)	ENSGALT00000092993 (RBIS)
Bursa	ENSGALT00000059601 (PTDSS1)	ENSGALT00000082823 (MTERF3)
Bursa	ENSGALT00000065707 (DCAF13)	ENSGALT00000048847 (SLC25A32)
Bursa	ENSGALT00000048868 (NDUFB9)	ENSGALT00000053515 (TATDN1)
Bursa	ENSGALT00000096157 (ENSGALG00000049122)	ENSGALT00000099487 (SLA)
Bursa	ENSGALT00000098075 (ENSGALG00000053276)	ENSGALT00000092458 (ENSGALG00000049289)
Bursa	ENSGALT00000002384 (NFS1)	ENSGALT00000085125 (ROMO1)
Bursa	ENSGALT00000099697 (NFS1)	ENSGALT00000085125 (ROMO1)
Bursa	ENSGALT00000004812 (PXMP4)	ENSGALT00000056181 (ZNF341)
Bursa	ENSGALT00000075646 (ENSGALG00000004110)	ENSGALT00000006521 (STK4)
Bursa	ENSGALT00000006537 (ENSGALG00000004110)	ENSGALT00000006521 (STK4)
Bursa	ENSGALT00000080339 (ENSGALG00000038484)	ENSGALT00000047845 (PKIG)
Bursa	ENSGALT00000085389 (SIRPA)	ENSGALT00000074450 (ENSGALG00000029485)
Bursa	ENSGALT00000099850 (TTI1)	ENSGALT00000010979 (RPRD1B)
Bursa	ENSGALT00000011080 (ZSWIM3)	ENSGALT00000011074 (ACOT8)
Bursa	ENSGALT00000073180 (CTSZ)	ENSGALT00000095073 (GNAS)
Bursa	ENSGALT00000012508 (GCNT7)	ENSGALT00000012492 (RTFDC1)
Bursa	ENSGALT00000076040 (GCNT7)	ENSGALT00000012492 (RTFDC1)
Bursa	ENSGALT00000091515 (ENSGALG00000052083)	ENSGALT00000101786 (PTPN1)
Bursa	ENSGALT00000067446 (KLHL21)	ENSGALT00000076662 (PHF13)
Bursa	ENSGALT00000001015 (RPL22)	ENSGALT00000063844 (RNF207)
Bursa	ENSGALT00000001764 (PANK4)	ENSGALT00000001776 (KBP)
Bursa	ENSGALT00000002586 (INTS11)	ENSGALT00000002613 (ENSGALG00000001701)
Bursa	ENSGALT00000006360 (MRTO4)	ENSGALT00000006382 (AKR7L)
Bursa	ENSGALT00000087131 (MAD2L2)	ENSGALT00000077374 (ENSGALG00000004646)
Bursa	ENSGALT00000093096 (SVBP)	ENSGALT00000043695 (ENSGALG00000025800)
Bursa	ENSGALT00000101019 (ENSGALG00000046740)	ENSGALT00000070374 (XPO7)
Bursa	ENSGALT00000002549 (MAK16)	ENSGALT00000002520 (TTI2)
Bursa	ENSGALT00000046784 (IKBKB)	ENSGALT00000087080 (ENSGALG00000041463)
Bursa	ENSGALT00000097651 (ENSGALG00000049780)	ENSGALT00000054933 (CIAO1)
Bursa	ENSGALT00000049116 (NCAPH)	ENSGALT00000107458 (ENSGALG00000050253)
Bursa	ENSGALT00000062687 (ENSGALG00000031789)	ENSGALT00000094176 (HK2)
Bursa	ENSGALT00000022505 (PCYOX1)	ENSGALT00000040525 (SNRPGP15)
Bursa	ENSGALT00000029510 (OGDH)	ENSGALT00000093024 (ENSGALG00000047157)
Bursa	ENSGALT00000094484 (OGDH)	ENSGALT00000093024 (ENSGALG00000047157)
Bursa	ENSGALT00000003067 (GNL2)	ENSGALT00000003106 (ENSGALG00000001996)
Bursa	ENSGALT00000049065 (ENSGALG00000037052)	ENSGALT00000005281 (EIF3I)
Bursa	ENSGALT00000005575 (RBBP4)	ENSGALT00000097257 (ZBTB8OS)
Bursa	ENSGALT00000093495 (RBBP4)	ENSGALT00000097257 (ZBTB8OS)
Bursa	ENSGALT00000090762 (AZIN2)	ENSGALT00000005690 (AK2)
Bursa	ENSGALT00000090942 (ENSGALG00000052196)	ENSGALT00000094228 (ENSGALG00000051101)
Bursa	ENSGALT00000100565 (SLC25A44)	ENSGALT00000094228 (ENSGALG00000051101)
Bursa	ENSGALT00000101477 (NNF1)	ENSGALT00000094228 (ENSGALG00000051101)
Bursa	ENSGALT00000100295 (NNF1)	ENSGALT00000094228 (ENSGALG00000051101)
Bursa	ENSGALT00000051767 (BGLAP)	ENSGALT00000094228 (ENSGALG00000051101)
Bursa	ENSGALT00000086666 (ENSGALG00000045705)	ENSGALT00000074039 (HMBS)
Bursa	ENSGALT00000082329 (HYLS1)	ENSGALT00000041115 (RPUSD4)
Bursa	ENSGALT00000070835 (HYLS1)	ENSGALT00000041115 (RPUSD4)
Bursa	ENSGALT00000046807 (SRPRA)	ENSGALT00000084815 (FOXRED1)
Bursa	ENSGALT00000002366 (ACAD8)	ENSGALT00000089258 (THYN1)
Bursa	ENSGALT00000019425 (TAGLN)	ENSGALT00000050114 (PCSK7)
Bursa	ENSGALT00000012488 (TRAPPC4)	ENSGALT00000012476 (ENSGALG00000007699)
Bursa	ENSGALT00000103144 (PIH1D2)	ENSGALT00000012801 (ENSGALG00000007882)
Bursa	ENSGALT00000087056 (NAXE)	ENSGALT00000102130 (GPATCH4)
Bursa	ENSGALT00000106295 (LAMTOR2)	ENSGALT00000072558 (UBQLN4)
Bursa	ENSGALT00000067623 (LAMTOR2)	ENSGALT00000072558 (UBQLN4)
Bursa	ENSGALT00000045737 (SNAPIN)	ENSGALT00000086502 (ILF2)
Bursa	ENSGALT00000101956 (ENSGALG00000047570)	ENSGALT00000046820 (ENSGALG00000040336)
Bursa	ENSGALT00000056011 (NDUFS2)	ENSGALT00000092700 (ENSGALG00000052689)
Bursa	ENSGALT00000099192 (SYPL2)	ENSGALT00000074807 (PSMA5)
Bursa	ENSGALT00000001686 (PFKFB2)	ENSGALT00000064315 (YOD1)
Bursa	ENSGALT00000002093 (TRAF3IP3)	ENSGALT00000053742 (WDR77)
Bursa	ENSGALT00000002207 (ATP5PB)	ENSGALT00000053742 (WDR77)
Bursa	ENSGALT00000002368 (MOV10)	ENSGALT00000002385 (RHOC)
Bursa	ENSGALT00000002807 (MAGI3)	ENSGALT00000002857 (PHTF1)
Bursa	ENSGALT00000045280 (DCLRE1B)	ENSGALT00000057570 (AP4B1)
Bursa	ENSGALT00000049972 (TOMM6)	ENSGALT00000091367 (USP49)
Bursa	ENSGALT00000087884 (ENSGALG00000045738)	ENSGALT00000094502 (PCGF2)
Bursa	ENSGALT00000062155 (ERBB2)	ENSGALT00000045413 (MIEN1)
Bursa	ENSGALT00000005488 (ENSGALG00000003464)	ENSGALT00000069177 (ENSGALG00000040313)
Bursa	ENSGALT00000005478 (CNP)	ENSGALT00000075442 (DNAJC7)
Bursa	ENSGALT00000044950 (NKIRAS2)	ENSGALT00000075442 (DNAJC7)
Bursa	ENSGALT00000005068 (MLX)	ENSGALT00000046721 (PSMC3IP)
Bursa	ENSGALT00000087871 (PSME3)	ENSGALT00000004706 (BECN1)
Bursa	ENSGALT00000001057 (APBA3)	ENSGALT00000045101 (MRPL54)
Bursa	ENSGALT00000102592 (MICOS13)	ENSGALT00000020974 (HSD11B1L)
Bursa	ENSGALT00000102211 (CFD)	ENSGALT00000003081 (MED16)
Bursa	ENSGALT00000060660 (DAZAP1)	ENSGALT00000097870 (ENSGALG00000040182)
Bursa	ENSGALT00000107845 (FCHO1)	ENSGALT00000081456 (JAK3)
Bursa	ENSGALT00000080507 (RAB3A)	ENSGALT00000090385 (MPV17L2)
Bursa	ENSGALT00000005915 (HAUS8)	ENSGALT00000040896 (MYO9B)
Bursa	ENSGALT00000071359 (VRK2)	ENSGALT00000067764 (FANCL)
Bursa	ENSGALT00000066674 (VRK2)	ENSGALT00000067764 (FANCL)
Bursa	ENSGALT00000057153 (RTN4)	ENSGALT00000013206 (EML6)
Bursa	ENSGALT00000102479 (RTN4)	ENSGALT00000013206 (EML6)
Bursa	ENSGALT00000043204 (ASB3)	ENSGALT00000013322 (CHAC2)
Bursa	ENSGALT00000068932 (ENSGALG00000029333)	ENSGALT00000082744 (ESF1)
Bursa	ENSGALT00000014390 (MDH1)	ENSGALT00000014402 (WDPCP)
Bursa	ENSGALT00000057642 (CEP68)	ENSGALT00000083942 (RAB1B)
Bursa	ENSGALT00000033264 (SNX5)	ENSGALT00000076330 (MGME1)
Bursa	ENSGALT00000056217 (GALM)	ENSGALT00000077309 (ENSGALG00000038528)
Bursa	ENSGALT00000076325 (ESRRG)	ENSGALT00000104526 (ENSGALG00000041996)
Bursa	ENSGALT00000038479 (NSL1)	ENSGALT00000031933 (TATDN3)
Bursa	ENSGALT00000016003 (INTS7)	ENSGALT00000015990 (DTL)
Bursa	ENSGALT00000016247 (PRKCE)	ENSGALT00000105633 (ENSGALG00000047946)
Bursa	ENSGALT00000016260 (RHOQ)	ENSGALT00000054390 (PIGF)
Bursa	ENSGALT00000016264 (CRIPT)	ENSGALT00000054390 (PIGF)
Bursa	ENSGALT00000107158 (RBKS)	ENSGALT00000016306 (BRE)
Bursa	ENSGALT00000016762 (ENSGALG00000010303)	ENSGALT00000106840 (MAD2L1BP)
Bursa	ENSGALT00000017183 (EIF2AK2)	ENSGALT00000064824 (GPATCH11)
Bursa	ENSGALT00000097478 (CEBPZOS)	ENSGALT00000066488 (CEBPZ)
Bursa	ENSGALT00000106583 (CEP170)	ENSGALT00000017430 (ENSGALG00000010713)
Bursa	ENSGALT00000084942 (CEP170)	ENSGALT00000017430 (ENSGALG00000010713)
Bursa	ENSGALT00000022610 (B3GALNT2)	ENSGALT00000022606 (ENSGALG00000013950)
Bursa	ENSGALT00000052694 (PHF10)	ENSGALT00000018251 (C3H6orf120)
Bursa	ENSGALT00000019010 (TCP1)	ENSGALT00000019060 (ACAT2)
Bursa	ENSGALT00000097909 (TMEM181)	ENSGALT00000099419 (DYNLT1)
Bursa	ENSGALT00000067131 (ENSGALG00000038188)	ENSGALT00000097646 (AKAP7)
Bursa	ENSGALT00000024014 (MCM9)	ENSGALT00000073491 (ASF1A)
Bursa	ENSGALT00000024100 (ZUP1)	ENSGALT00000024093 (KPNA5)
Bursa	ENSGALT00000044965 (TRAPPC3L)	ENSGALT00000067847 (FAM26E)
Bursa	ENSGALT00000106190 (RTN4IP1)	ENSGALT00000102103 (ENSGALG00000047141)
Bursa	ENSGALT00000045345 (BORCS6)	ENSGALT00000025447 (PNRC1)
Bursa	ENSGALT00000025553 (ME1)	ENSGALT00000025556 (RWDD2A)
Bursa	ENSGALT00000097669 (ENSGALG00000051001)	ENSGALT00000025644 (CD109)
Bursa	ENSGALT00000101074 (ENSGALG00000053695)	ENSGALT00000060276 (KCNQ5)
Bursa	ENSGALT00000096920 (ANGPT2)	ENSGALT00000086126 (MCPH1)
Bursa	ENSGALT00000060832 (ANGPT2)	ENSGALT00000086126 (MCPH1)
Bursa	ENSGALT00000026434 (TRAPPC12)	ENSGALT00000026430 (TSSC1)
Bursa	ENSGALT00000107871 (ENSGALG00000049474)	ENSGALT00000026473 (MBOAT2)
Bursa	ENSGALT00000093705 (ATP6V1C2)	ENSGALT00000026538 (PDIA6)
Bursa	ENSGALT00000070715 (ATP6V1C2)	ENSGALT00000026538 (PDIA6)
Bursa	ENSGALT00000026572 (GEN1)	ENSGALT00000026569 (SMC6)
Bursa	ENSGALT00000107502 (ENSGALG00000044479)	ENSGALT00000031575 (PFN4)
Bursa	ENSGALT00000026714 (HADHB)	ENSGALT00000026684 (HADHA)
Bursa	ENSGALT00000060697 (IMP3)	ENSGALT00000026970 (PLA2G7)
Bursa	ENSGALT00000073056 (FARSA)	ENSGALT00000067189 (CALR)
Bursa	ENSGALT00000093677 (ENSGALG00000038666)	ENSGALT00000081607 (UBL5)
Bursa	ENSGALT00000092669 (ENSGALG00000038666)	ENSGALT00000081607 (UBL5)
Bursa	ENSGALT00000073335 (ATP13A1)	ENSGALT00000060969 (MVB12A)
Bursa	ENSGALT00000098366 (ENSGALG00000048625)	ENSGALT00000100976 (ENSGALG00000054294)
Bursa	ENSGALT00000082857 (THAP7)	ENSGALT00000064260 (ENSGALG00000034772)
Bursa	ENSGALT00000072897 (THAP7)	ENSGALT00000064260 (ENSGALG00000034772)
Bursa	ENSGALT00000104343 (SAE1)	ENSGALT00000100677 (ENSGALG00000049505)
Bursa	ENSGALT00000082408 (MARS)	ENSGALT00000050399 (ENSGALG00000031518)
Bursa	ENSGALT00000093671 (ENSGALG00000053244)	ENSGALT00000106519 (ENSGALG00000050539)
Bursa	ENSGALT00000052009 (CSAD)	ENSGALT00000086793 (ZNF740)
Bursa	ENSGALT00000006376 (AIFM1)	ENSGALT00000006401 (MARS2)
Bursa	ENSGALT00000006172 (ERCC6L)	ENSGALT00000040547 (ENSGALG00000003920)
Bursa	ENSGALT00000007959 (TIMM8A)	ENSGALT00000007977 (ENSGALG00000004975)
Bursa	ENSGALT00000104049 (ENSGALG00000051025)	ENSGALT00000080817 (ENSGALG00000029462)
Bursa	ENSGALT00000092964 (ENSGALG00000048179)	ENSGALT00000013477 (ATG4A)
Bursa	ENSGALT00000080145 (NRK)	ENSGALT00000107288 (ENSGALG00000051675)
Bursa	ENSGALT00000014591 (NRK)	ENSGALT00000107288 (ENSGALG00000051675)
Bursa	ENSGALT00000014910 (IDS)	ENSGALT00000088976 (ENSGALG00000029286)
Bursa	ENSGALT00000015372 (ETFDH)	ENSGALT00000015382 (PPID)
Bursa	ENSGALT00000078753 (KLHL2)	ENSGALT00000028637 (7SK)
Bursa	ENSGALT00000067980 (KLHL2)	ENSGALT00000028637 (7SK)
Bursa	ENSGALT00000070694 (HHIP)	ENSGALT00000091899 (ANAPC10)
Bursa	ENSGALT00000104517 (ENSGALG00000048950)	ENSGALT00000016223 (ZNF827)
Bursa	ENSGALT00000087558 (MAB21L2)	ENSGALT00000056918 (LRBA)
Bursa	ENSGALT00000107607 (SCLT1)	ENSGALT00000016460 (CDKL2)
Bursa	ENSGALT00000101264 (SCLT1)	ENSGALT00000016460 (CDKL2)
Bursa	ENSGALT00000016584 (ABHD18)	ENSGALT00000016578 (MFSD8)
Bursa	ENSGALT00000067326 (GTF2E2)	ENSGALT00000093271 (SMIM18)
Bursa	ENSGALT00000016727 (GTF2E2)	ENSGALT00000093271 (SMIM18)
Bursa	ENSGALT00000016820 (CNOT6L)	ENSGALT00000092541 (MRPL1)
Bursa	ENSGALT00000068504 (ENSGALG00000042001)	ENSGALT00000051420 (PYURF)
Bursa	ENSGALT00000032215 (CENPU)	ENSGALT00000038264 (PRIMPOL)
Bursa	ENSGALT00000100963 (CASP3)	ENSGALT00000038264 (PRIMPOL)
Bursa	ENSGALT00000095180 (RWDD4)	ENSGALT00000017333 (TRAPPC11)
Bursa	ENSGALT00000092045 (TMEM150C)	ENSGALT00000057256 (ENOPH1)
Bursa	ENSGALT00000038016 (HNRNPDL)	ENSGALT00000057256 (ENOPH1)
Bursa	ENSGALT00000047514 (HNRNPDL)	ENSGALT00000057256 (ENOPH1)
Bursa	ENSGALT00000068418 (HNRNPDL)	ENSGALT00000057256 (ENOPH1)
Bursa	ENSGALT00000038003 (MRPS18C)	ENSGALT00000018281 (FAM175A)
Bursa	ENSGALT00000101063 (IGFBP7)	ENSGALT00000037965 (POLR2B)
Bursa	ENSGALT00000101176 (ENSGALG00000053080)	ENSGALT00000037951 (HOPX)
Bursa	ENSGALT00000099383 (NUDT6)	ENSGALT00000085206 (SPATA5)
Bursa	ENSGALT00000054115 (MTMR7)	ENSGALT00000022194 (VPS37A)
Bursa	ENSGALT00000022312 (PPAT)	ENSGALT00000093621 (PAICS)
Bursa	ENSGALT00000023118 (RFC1)	ENSGALT00000022768 (ENSGALG00000049347)
Bursa	ENSGALT00000082932 (NOP56)	ENSGALT00000052568 (IDH3B)
Bursa	ENSGALT00000079016 (RAD9A)	ENSGALT00000051728 (PPP1CA)
Bursa	ENSGALT00000073888 (TMEM138)	ENSGALT00000089662 (CYB561A3)
Bursa	ENSGALT00000086995 (TMEM138)	ENSGALT00000089662 (CYB561A3)
Bursa	ENSGALT00000050879 (SDHAF2)	ENSGALT00000071357 (CPSF7)
Bursa	ENSGALT00000077591 (ENSGALG00000034939)	ENSGALT00000069733 (AIP)
Bursa	ENSGALT00000071261 (PDDC1)	ENSGALT00000086673 (NLRP3)
Bursa	ENSGALT00000049686 (C15orf62)	ENSGALT00000061124 (DNAJC17)
Bursa	ENSGALT00000006309 (PRMT3)	ENSGALT00000107755 (ENSGALG00000047154)
Bursa	ENSGALT00000103240 (ELP4)	ENSGALT00000031814 (IMMP1L)
Bursa	ENSGALT00000019813 (ELP4)	ENSGALT00000031814 (IMMP1L)
Bursa	ENSGALT00000076589 (PPFIBP2)	ENSGALT00000047322 (CYB5R2)
Bursa	ENSGALT00000054383 (CALCA)	ENSGALT00000009745 (CYP2R1)
Bursa	ENSGALT00000012899 (C5H11orf74)	ENSGALT00000086146 (RAG2)
Bursa	ENSGALT00000013128 (KBTBD4)	ENSGALT00000013121 (NDUFS3)
Bursa	ENSGALT00000013143 (CELF1)	ENSGALT00000013133 (PTPMT1)
Bursa	ENSGALT00000013368 (ACP2)	ENSGALT00000013377 (DDB2)
Bursa	ENSGALT00000045646 (CHAC1)	ENSGALT00000107557 (INO80)
Bursa	ENSGALT00000013997 (RTF1)	ENSGALT00000013981 (NDUFAF1)
Bursa	ENSGALT00000097876 (ENSGALG00000052965)	ENSGALT00000079778 (C5H15orf41)
Bursa	ENSGALT00000016576 (COQ6)	ENSGALT00000016585 (ENTPD5)
Bursa	ENSGALT00000037710 (TTLL5)	ENSGALT00000081527 (ENSGALG00000034354)
Bursa	ENSGALT00000089352 (TTLL5)	ENSGALT00000081527 (ENSGALG00000034354)
Bursa	ENSGALT00000087710 (SLIRP)	ENSGALT00000017074 (ALKBH1)
Bursa	ENSGALT00000055042 (SLIRP)	ENSGALT00000017099 (SNW1)
Bursa	ENSGALT00000102633 (ADCK1)	ENSGALT00000017099 (SNW1)
Bursa	ENSGALT00000094557 (TDP1)	ENSGALT00000032540 (EFCAB11)
Bursa	ENSGALT00000017538 (CPSF2)	ENSGALT00000037601 (NDUFB1)
Bursa	ENSGALT00000101237 (GSKIP)	ENSGALT00000066952 (ATG2B)
Bursa	ENSGALT00000057576 (BTBD6)	ENSGALT00000019132 (BRF1)
Bursa	ENSGALT00000079178 (EXOC5)	ENSGALT00000019765 (AP5M1)
Bursa	ENSGALT00000074859 (ATP5S)	ENSGALT00000020088 (CDKL1)
Bursa	ENSGALT00000020162 (ATL1)	ENSGALT00000020164 (SAV1)
Bursa	ENSGALT00000032445 (ENSGALG00000020342)	ENSGALT00000020196 (PYGL)
Bursa	ENSGALT00000020354 (ENSGALG00000012452)	ENSGALT00000103422 (FANCM)
Bursa	ENSGALT00000020371 (SOUL)	ENSGALT00000103422 (FANCM)
Bursa	ENSGALT00000070716 (FKBP3)	ENSGALT00000103422 (FANCM)
Bursa	ENSGALT00000078099 (ENSGALG00000040737)	ENSGALT00000071346 (ENSGALG00000043130)
Bursa	ENSGALT00000052751 (ENSGALG00000040055)	ENSGALT00000071346 (ENSGALG00000043130)
Bursa	ENSGALT00000103622 (ENSGALG00000040737)	ENSGALT00000071346 (ENSGALG00000043130)
Bursa	ENSGALT00000084769 (ENSGALG00000031497)	ENSGALT00000071346 (ENSGALG00000043130)
Bursa	ENSGALT00000003306 (PARG)	ENSGALT00000003257 (ENSGALG00000002089)
Bursa	ENSGALT00000004372 (DNAJC12)	ENSGALT00000004359 (SIRT1)
Bursa	ENSGALT00000107011 (ENSGALG00000053729)	ENSGALT00000095069 (SLC25A16)
Bursa	ENSGALT00000089611 (ASCC1)	ENSGALT00000007029 (ANAPC16)
Bursa	ENSGALT00000049666 (ASCC1)	ENSGALT00000007029 (ANAPC16)
Bursa	ENSGALT00000043311 (ZCCHC24)	ENSGALT00000097482 (ENSGALG00000051960)
Bursa	ENSGALT00000007929 (POLR3A)	ENSGALT00000072914 (RPS24)
Bursa	ENSGALT00000012071 (COX15)	ENSGALT00000046257 (CUTC)
Bursa	ENSGALT00000051958 (RRP12)	ENSGALT00000039466 (PGAM1)
Bursa	ENSGALT00000085289 (LDB1)	ENSGALT00000012011 (PPRC1)
Bursa	ENSGALT00000062430 (POLL)	ENSGALT00000012535 (DPCD)
Bursa	ENSGALT00000085724 (POLL)	ENSGALT00000012535 (DPCD)
Bursa	ENSGALT00000091708 (POLL)	ENSGALT00000012535 (DPCD)
Bursa	ENSGALT00000013413 (TAF5)	ENSGALT00000051809 (USMG5)
Bursa	ENSGALT00000103201 (SFR1)	ENSGALT00000082951 (ENSGALG00000036896)
Bursa	ENSGALT00000107684 (PDCD4)	ENSGALT00000057879 (BBIP1)
Bursa	ENSGALT00000014159 (PDCD4)	ENSGALT00000057879 (BBIP1)
Bursa	ENSGALT00000055818 (PDCD4)	ENSGALT00000057879 (BBIP1)
Bursa	ENSGALT00000107236 (ENO4)	ENSGALT00000107793 (SHTN1)
Bursa	ENSGALT00000015203 (FAM45A)	ENSGALT00000015227 (SFXN4)
Bursa	ENSGALT00000108109 (DOCK1)	ENSGALT00000074191 (INSYN2A)
Bursa	ENSGALT00000082301 (ALDH18A1)	ENSGALT00000103444 (ENSGALG00000051783)
Bursa	ENSGALT00000054973 (ALDH18A1)	ENSGALT00000103444 (ENSGALG00000051783)
Bursa	ENSGALT00000090535 (ORMDL1)	ENSGALT00000075877 (PMS1)
Bursa	ENSGALT00000013388 (NIF3L1)	ENSGALT00000103811 (PPIL3)
Bursa	ENSGALT00000014220 (ENSGALG00000008738)	ENSGALT00000080101 (CYP20A1)
Bursa	ENSGALT00000073063 (SLC25A12)	ENSGALT00000015508 (HAT1)
Bursa	ENSGALT00000015749 (METTL5)	ENSGALT00000100882 (SSB)
Bursa	ENSGALT00000067019 (DNPEP)	ENSGALT00000018446 (DES)
Bursa	ENSGALT00000072293 (PTPRN)	ENSGALT00000018446 (DES)
Bursa	ENSGALT00000018510 (CNPPD1)	ENSGALT00000077523 (ZFAND2B)
Bursa	ENSGALT00000087444 (AAMP)	ENSGALT00000018675 (ARPC2)
Bursa	ENSGALT00000042561 (ENSGALG00000025648)	ENSGALT00000019030 (CLASP1)
Bursa	ENSGALT00000083500 (PARP9)	ENSGALT00000096667 (FAIM)
Bursa	ENSGALT00000090492 (PARP9)	ENSGALT00000096667 (FAIM)
Bursa	ENSGALT00000037868 (GPR39)	ENSGALT00000095849 (LYPD1)
Bursa	ENSGALT00000020527 (TANC1)	ENSGALT00000020533 (WDSUB1)
Bursa	ENSGALT00000003258 (GPSM2)	ENSGALT00000003286 (CLCC1)
Bursa	ENSGALT00000106545 (ENSGALG00000054302)	ENSGALT00000003418 (NR5A2)
Bursa	ENSGALT00000105920 (ENSGALG00000054302)	ENSGALT00000003418 (NR5A2)
Bursa	ENSGALT00000091029 (ENSGALG00000054260)	ENSGALT00000003418 (NR5A2)
Bursa	ENSGALT00000098224 (B3GALT2)	ENSGALT00000003897 (CDC73)
Bursa	ENSGALT00000096288 (ENSGALG00000050838)	ENSGALT00000004826 (PRDX6)
Bursa	ENSGALT00000073277 (SCYL3)	ENSGALT00000072136 (C1orf112)
Bursa	ENSGALT00000056245 (METTL18)	ENSGALT00000072136 (C1orf112)
Bursa	ENSGALT00000006824 (ANGPTL1)	ENSGALT00000006794 (RALGPS2)
Bursa	ENSGALT00000052097 (MRPS14)	ENSGALT00000007248 (CACYBP)
Bursa	ENSGALT00000053904 (TPR)	ENSGALT00000008146 (C8H1orf27)
Bursa	ENSGALT00000008185 (TPR)	ENSGALT00000008146 (C8H1orf27)
Bursa	ENSGALT00000033221 (FAM183A)	ENSGALT00000014724 (EBNA1BP2)
Bursa	ENSGALT00000016612 (UROD)	ENSGALT00000016610 (ENSGALG00000010217)
Bursa	ENSGALT00000016649 (AKR1A1)	ENSGALT00000062686 (PRDX1)
Bursa	ENSGALT00000084097 (AKR1A1)	ENSGALT00000062686 (PRDX1)
Bursa	ENSGALT00000086151 (AKR1A1)	ENSGALT00000062686 (PRDX1)
Bursa	ENSGALT00000038158 (MRPL37)	ENSGALT00000017496 (ENSGALG00000010758)
Bursa	ENSGALT00000053156 (FGGY)	ENSGALT00000038039 (JUN)
Bursa	ENSGALT00000086450 (ANGPTL3)	ENSGALT00000095917 (DOCK7)
Bursa	ENSGALT00000017909 (EFCAB7)	ENSGALT00000044324 (ITGB3BP)
Bursa	ENSGALT00000018546 (LHX8)	ENSGALT00000066408 (SLC44A5)
Bursa	ENSGALT00000063906 (GIGYF2)	ENSGALT00000002259 (KCNJ13)
Bursa	ENSGALT00000092864 (CEP19)	ENSGALT00000090549 (NRROS)
Bursa	ENSGALT00000040843 (MOGAT1)	ENSGALT00000008412 (FARSB)
Bursa	ENSGALT00000004364 (ATP1B3)	ENSGALT00000105033 (TFDP2)
Bursa	ENSGALT00000048841 (MCF2L2)	ENSGALT00000058942 (B3GNT5)
Bursa	ENSGALT00000015715 (LXN)	ENSGALT00000015688 (GFM1)
Bursa	ENSGALT00000062124 (P2RY13)	ENSGALT00000016895 (MED12L)
Bursa	ENSGALT00000082876 (P2RY14)	ENSGALT00000016895 (MED12L)
Bursa	ENSGALT00000080536 (GPR171)	ENSGALT00000016895 (MED12L)
Bursa	ENSGALT00000099830 (CP)	ENSGALT00000082756 (HPS3)
Bursa	ENSGALT00000100007 (MED11)	ENSGALT00000098531 (ENSGALG00000049559)
Bursa	ENSGALT00000092795 (COLGALT1)	ENSGALT00000107074 (PRKCSH)
Bursa	ENSGALT00000053568 (MT-CO1)	ENSGALT00000056830 (ENSGALG00000033462)
Bursa	ENSGALT00000052116 (ENSGALG00000034584)	ENSGALT00000106921 (ENSGALG00000053757)
Bursa	ENSGALT00000093580 (ENSGALG00000046684)	ENSGALT00000066139 (SETBP1)
Bursa	ENSGALT00000039477 (IFNW1)	ENSGALT00000095477 (ENSGALG00000013809)
Bursa	ENSGALT00000101642 (IFN-A)	ENSGALT00000095477 (ENSGALG00000013809)
Bursa	ENSGALT00000092218 (IFN-A)	ENSGALT00000095477 (ENSGALG00000013809)
Bursa	ENSGALT00000100222 (ENSGALG00000054396)	ENSGALT00000095477 (ENSGALG00000013809)
Bursa	ENSGALT00000091729 (IFN-A)	ENSGALT00000095477 (ENSGALG00000013809)
Bursa	ENSGALT00000102661 (IFN-A)	ENSGALT00000095477 (ENSGALG00000013809)
Bursa	ENSGALT00000083687 (ENSGALG00000044725)	ENSGALT00000095477 (ENSGALG00000013809)
Bursa	ENSGALT00000107243 (IFN-A)	ENSGALT00000095477 (ENSGALG00000013809)
Bursa	ENSGALT00000096515 (ENSGALG00000052209)	ENSGALT00000095477 (ENSGALG00000013809)
Bursa	ENSGALT00000019338 (ENSGALG00000054104)	ENSGALT00000095477 (ENSGALG00000013809)
Bursa	ENSGALT00000003796 (GBA2)	ENSGALT00000088738 (RGP1)
Bursa	ENSGALT00000004064 (ENSGALG00000002578)	ENSGALT00000034416 (CA9)
Bursa	ENSGALT00000004088 (ARHGEF39)	ENSGALT00000066276 (ENSGALG00000037611)
Bursa	ENSGALT00000005609 (SKP2)	ENSGALT00000021822 (LMBRD2)
Bursa	ENSGALT00000023719 (SKIV2L2)	ENSGALT00000023722 (PLPP1)
Bursa	ENSGALT00000071193 (SHLD3)	ENSGALT00000023814 (TRIM23)
Bursa	ENSGALT00000023818 (TRAPPC13)	ENSGALT00000023814 (TRIM23)
Bursa	ENSGALT00000089674 (TRAPPC13)	ENSGALT00000023814 (TRIM23)
Bursa	ENSGALT00000038562 (F2RL2)	ENSGALT00000049094 (IQGAP2)
Bursa	ENSGALT00000023330 (CDC37L1)	ENSGALT00000070268 (AK3)
Bursa	ENSGALT00000028137 (OSTF1)	ENSGALT00000077373 (NMRK1)
Bursa	ENSGALT00000097512 (AOPEP)	ENSGALT00000107984 (ENSGALG00000052891)
Bursa	ENSGALT00000050692 (AOPEP)	ENSGALT00000107984 (ENSGALG00000052891)
Bursa	ENSGALT00000037896 (REEP5)	ENSGALT00000000294 (SRP19)
Bursa	ENSGALT00000037630 (ALDOB)	ENSGALT00000100330 (RNF20)
Bursa	ENSGALT00000002781 (IFT74)	ENSGALT00000085539 (ENSGALG00000045028)
Bursa	ENSGALT00000104756 (IFT74)	ENSGALT00000085539 (ENSGALG00000045028)
Bursa	ENSGALT00000003696 (ATG12)	ENSGALT00000003691 (AP3S1)
Bursa	ENSGALT00000028259 (ENSGALG00000017558)	ENSGALT00000042981 (ENSGALG00000029118)
Bursa	ENSGALT00000106415 (ENSGALG00000017558)	ENSGALT00000042981 (ENSGALG00000029118)
Ileum	ENSGALT00000013282 (GDI1)	ENSGALT00000092270 (FBXO18)
Ileum	ENSGALT00000105830 (ENSGALG00000050475)	ENSGALT00000101201 (ENSGALG00000052368)
Ileum	ENSGALT00000010717 (TMEM243)	ENSGALT00000075153 (DMTF1)
Ileum	ENSGALT00000013522 (FGL2)	ENSGALT00000013526 (ENSGALG00000008309)
Ileum	ENSGALT00000013515 (FAM185A)	ENSGALT00000013526 (ENSGALG00000008309)
Ileum	ENSGALT00000013473 (PMPCB)	ENSGALT00000013428 (DNAJC2)
Ileum	ENSGALT00000013186 (RINT1)	ENSGALT00000104579 (EFCAB10)
Ileum	ENSGALT00000013062 (HBP1)	ENSGALT00000068162 (COG5)
Ileum	ENSGALT00000013029 (ENSGALG00000008032)	ENSGALT00000068162 (COG5)
Ileum	ENSGALT00000039460 (DUS4L)	ENSGALT00000068162 (COG5)
Ileum	ENSGALT00000093514 (ENSGALG00000049506)	ENSGALT00000075689 (PLXNB2)
Ileum	ENSGALT00000038864 (IMMP2L)	ENSGALT00000015449 (LRRN3)
Ileum	ENSGALT00000102658 (ENSGALG00000048795)	ENSGALT00000058977 (H2A-VI)
Ileum	ENSGALT00000081149 (ENSGALG00000034631)	ENSGALT00000079743 (HIST1H103)
Ileum	ENSGALT00000042655 (HIST1H3H)	ENSGALT00000098465 (ENSGALG00000046904)
Ileum	ENSGALT00000020100 (ANKRD54)	ENSGALT00000020091 (EIF3L)
Ileum	ENSGALT00000088334 (GLT8D2)	ENSGALT00000052099 (TDG)
Ileum	ENSGALT00000068252 (C1H12ORF73)	ENSGALT00000052099 (TDG)
Ileum	ENSGALT00000021228 (WNT5B)	ENSGALT00000079396 (FBXL14)
Ileum	ENSGALT00000107872 (CACNA1C)	ENSGALT00000097702 (DCP1B)
Ileum	ENSGALT00000085898 (CALD1)	ENSGALT00000102533 (ENSGALG00000051034)
Ileum	ENSGALT00000059512 (ENSGALG00000014126)	ENSGALT00000084080 (CYB5R1)
Ileum	ENSGALT00000030515 (ENSGALG00000019262)	ENSGALT00000084080 (CYB5R1)
Ileum	ENSGALT00000097946 (TSPO)	ENSGALT00000069414 (MCAT)
Ileum	ENSGALT00000099773 (ENSGALG00000052513)	ENSGALT00000023174 (TSPAN9)
Ileum	ENSGALT00000023289 (FAM162A)	ENSGALT00000084532 (CCDC58)
Ileum	ENSGALT00000060423 (NAA50)	ENSGALT00000096999 (ENSGALG00000053172)
Ileum	ENSGALT00000079058 (NEPRO)	ENSGALT00000085162 (TAF13)
Ileum	ENSGALT00000091824 (NEPRO)	ENSGALT00000085162 (TAF13)
Ileum	ENSGALT00000024500 (NEPRO)	ENSGALT00000085162 (TAF13)
Ileum	ENSGALT00000024577 (NME7)	ENSGALT00000036926 (ATP1B1)
Ileum	ENSGALT00000094022 (NME7)	ENSGALT00000036926 (ATP1B1)
Ileum	ENSGALT00000094520 (HHLA2)	ENSGALT00000024781 (IFT57)
Ileum	ENSGALT00000024861 (ARL13B)	ENSGALT00000096052 (STX19)
Ileum	ENSGALT00000036866 (ENSGALG00000024077)	ENSGALT00000070424 (MINA)
Ileum	ENSGALT00000101025 (ENSGALG00000024077)	ENSGALT00000070424 (MINA)
Ileum	ENSGALT00000024984 (GPR89A)	ENSGALT00000091927 (PDZK1)
Ileum	ENSGALT00000068147 (JAM2)	ENSGALT00000063486 (ATP5PF)
Ileum	ENSGALT00000030337 (GATD3A)	ENSGALT00000092229 (ENSGALG00000046714)
Ileum	ENSGALT00000054938 (CASK)	ENSGALT00000026167 (GPR34)
Ileum	ENSGALT00000091460 (CASK)	ENSGALT00000026167 (GPR34)
Ileum	ENSGALT00000064964 (KLHL15)	ENSGALT00000026357 (EIF2S3)
Ileum	ENSGALT00000107403 (TRAPPC2)	ENSGALT00000026762 (RAB9A)
Ileum	ENSGALT00000099183 (ENSGALG00000049035)	ENSGALT00000093632 (ENSGALG00000049782)
Ileum	ENSGALT00000030243 (ENSGALG00000016760)	ENSGALT00000027060 (MITD1)
Ileum	ENSGALT00000063432 (ENSGALG00000016760)	ENSGALT00000027063 (LYG2)
Ileum	ENSGALT00000063432 (ENSGALG00000016760)	ENSGALT00000027060 (MITD1)
Ileum	ENSGALT00000027117 (C1H2ORF49)	ENSGALT00000061172 (FHL2)
Ileum	ENSGALT00000027271 (GPR183)	ENSGALT00000058077 (UBAC2)
Ileum	ENSGALT00000036524 (GPR18)	ENSGALT00000058077 (UBAC2)
Ileum	ENSGALT00000027397 (WBP4)	ENSGALT00000027391 (ELF1)
Ileum	ENSGALT00000027426 (GTF2F2)	ENSGALT00000027428 (KCTD4)
Ileum	ENSGALT00000036484 (RB1)	ENSGALT00000027460 (LPAR6)
Ileum	ENSGALT00000100205 (ENSGALG00000051011)	ENSGALT00000092459 (ENSGALG00000054610)
Ileum	ENSGALT00000027510 (VPS36)	ENSGALT00000027509 (CKAP2)
Ileum	ENSGALT00000036465 (SUPT20H)	ENSGALT00000061853 (EXOSC8)
Ileum	ENSGALT00000027620 (MTIF3)	ENSGALT00000027621 (GTF3A)
Ileum	ENSGALT00000092350 (MTIF3)	ENSGALT00000027621 (GTF3A)
Ileum	ENSGALT00000091286 (MTIF3)	ENSGALT00000027621 (GTF3A)
Ileum	ENSGALT00000027829 (VSTM5)	ENSGALT00000027831 (MED17)
Ileum	ENSGALT00000099250 (ENSGALG00000017220)	ENSGALT00000060059 (ENSGALG00000040433)
Ileum	ENSGALT00000027834 (ENSGALG00000017220)	ENSGALT00000060059 (ENSGALG00000040433)
Ileum	ENSGALT00000042575 (ENSGALG00000025662)	ENSGALT00000060059 (ENSGALG00000040433)
Ileum	ENSGALT00000042593 (ENSGALG00000025680)	ENSGALT00000060059 (ENSGALG00000040433)
Ileum	ENSGALT00000095300 (FAM168A)	ENSGALT00000086546 (ENSGALG00000044739)
Ileum	ENSGALT00000078703 (FCHSD2)	ENSGALT00000027999 (ARHGEF17)
Ileum	ENSGALT00000028004 (FCHSD2)	ENSGALT00000027999 (ARHGEF17)
Ileum	ENSGALT00000105587 (ENSGALG00000052767)	ENSGALT00000036373 (HBBA)
Ileum	ENSGALT00000091123 (ENSGALG00000047924)	ENSGALT00000098387 (ENSGALG00000038550)
Ileum	ENSGALT00000103620 (ENSGALG00000047924)	ENSGALT00000098387 (ENSGALG00000038550)
Ileum	ENSGALT00000104377 (NEO1)	ENSGALT00000095654 (ENSGALG00000055009)
Ileum	ENSGALT00000082543 (ENSGALG00000033780)	ENSGALT00000058852 (ITGB1BP3)
Ileum	ENSGALT00000051937 (ENSGALG00000033780)	ENSGALT00000058852 (ITGB1BP3)
Ileum	ENSGALT00000091589 (ENSGALG00000033780)	ENSGALT00000058852 (ITGB1BP3)
Ileum	ENSGALT00000097973 (ENSGALG00000033780)	ENSGALT00000058852 (ITGB1BP3)
Ileum	ENSGALT00000085495 (POLG)	ENSGALT00000010770 (FANCI)
Ileum	ENSGALT00000012093 (HACD3)	ENSGALT00000094572 (VWA9)
Ileum	ENSGALT00000012364 (DIS3L)	ENSGALT00000062194 (TIPIN)
Ileum	ENSGALT00000074963 (SMAD3)	ENSGALT00000104070 (AAGAB)
Ileum	ENSGALT00000085779 (ENSGALG00000045045)	ENSGALT00000013516 (CIB4)
Ileum	ENSGALT00000090795 (ENSGALG00000047540)	ENSGALT00000105914 (ENSGALG00000051766)
Ileum	ENSGALT00000074111 (CIAPIN1)	ENSGALT00000001797 (COQ9)
Ileum	ENSGALT00000004875 (NUDT21)	ENSGALT00000004848 (OGFOD1)
Ileum	ENSGALT00000005070 (FBXL8)	ENSGALT00000005064 (TRADD)
Ileum	ENSGALT00000106471 (DDX28)	ENSGALT00000005388 (DUS2)
Ileum	ENSGALT00000075864 (ITFG1)	ENSGALT00000006378 (PHKB)
Ileum	ENSGALT00000058562 (MYLK3)	ENSGALT00000006929 (ORC6)
Ileum	ENSGALT00000085464 (VPS35)	ENSGALT00000063938 (ORC6)
Ileum	ENSGALT00000087605 (FAAP24)	ENSGALT00000007588 (CEP89)
Ileum	ENSGALT00000097134 (FAAP24)	ENSGALT00000078637 (ENSGALG00000004814)
Ileum	ENSGALT00000077917 (CEBPG)	ENSGALT00000007832 (PEPD)
Ileum	ENSGALT00000007911 (SS18L2)	ENSGALT00000076733 (KIAA0355)
Ileum	ENSGALT00000008632 (WWOX)	ENSGALT00000043755 (MAF)
Ileum	ENSGALT00000000702 (ZNF276)	ENSGALT00000038833 (VPS9D1)
Ileum	ENSGALT00000044355 (DEF8)	ENSGALT00000101009 (DBNDD1)
Ileum	ENSGALT00000000910 (UTP4)	ENSGALT00000058298 (CHTF8)
Ileum	ENSGALT00000059294 (ENSGALG00000040713)	ENSGALT00000098624 (PDF)
Ileum	ENSGALT00000047563 (KARS)	ENSGALT00000001325 (TERF2IP)
Ileum	ENSGALT00000001334 (KARS)	ENSGALT00000001325 (TERF2IP)
Ileum	ENSGALT00000003917 (RNF123)	ENSGALT00000105582 (AMIGO3)
Ileum	ENSGALT00000069748 (PPM1M)	ENSGALT00000006336 (TWF2)
Ileum	ENSGALT00000007462 (IPPK)	ENSGALT00000007467 (CENPP)
Ileum	ENSGALT00000007480 (ECM2)	ENSGALT00000007467 (CENPP)
Ileum	ENSGALT00000007519 (ASPN)	ENSGALT00000007467 (CENPP)
Ileum	ENSGALT00000045074 (OGN)	ENSGALT00000007467 (CENPP)
Ileum	ENSGALT00000105794 (ENSGALG00000004955)	ENSGALT00000091165 (TIMP4)
Ileum	ENSGALT00000007983 (TSEN2)	ENSGALT00000043832 (MKRN2OS)
Ileum	ENSGALT00000044551 (NINJ1)	ENSGALT00000092197 (ENSGALG00000049146)
Ileum	ENSGALT00000103911 (ENSGALG00000048408)	ENSGALT00000054403 (DCP1A)
Ileum	ENSGALT00000098927 (DALRD3)	ENSGALT00000011236 (WDR6)
Ileum	ENSGALT00000044814 (SLC25A20)	ENSGALT00000063242 (ARIH2)
Ileum	ENSGALT00000013716 (CAND2)	ENSGALT00000084738 (SEC13)
Ileum	ENSGALT00000073565 (IFT122)	ENSGALT00000096664 (MBD4)
Ileum	ENSGALT00000082836 (ENSGALG00000029346)	ENSGALT00000064754 (ZMAT2)
Ileum	ENSGALT00000004056 (ENSGALG00000002570)	ENSGALT00000004047 (ARAP3)
Ileum	ENSGALT00000051133 (ENSGALG00000042423)	ENSGALT00000004015 (PCDH12)
Ileum	ENSGALT00000044150 (INSYN2B)	ENSGALT00000003239 (DOCK2)
Ileum	ENSGALT00000047574 (SLU7)	ENSGALT00000002291 (PTTG2)
Ileum	ENSGALT00000050464 (SLU7)	ENSGALT00000002291 (PTTG2)
Ileum	ENSGALT00000005307 (ENSGALG00000003355)	ENSGALT00000005313 (ARL10)
Ileum	ENSGALT00000089325 (THOC3)	ENSGALT00000061660 (SIMC1)
Ileum	ENSGALT00000006650 (SPARC)	ENSGALT00000099424 (ENSGALG00000033148)
Ileum	ENSGALT00000063933 (HNRNPH2)	ENSGALT00000009585 (DGUOK)
Ileum	ENSGALT00000080575 (HNRNPH2)	ENSGALT00000009585 (DGUOK)
Ileum	ENSGALT00000088178 (HNRNPH2)	ENSGALT00000009585 (DGUOK)
Ileum	ENSGALT00000095094 (ENSGALG00000034305)	ENSGALT00000107573 (ENSGALG00000047174)
Ileum	ENSGALT00000023235 (PHYKPL)	ENSGALT00000083027 (HNRNPAB)
Ileum	ENSGALT00000008486 (GNG13)	ENSGALT00000057565 (CHTF18)
Ileum	ENSGALT00000008614 (NARFL)	ENSGALT00000008668 (HAGHL)
Ileum	ENSGALT00000008778 (NDUFB10)	ENSGALT00000008816 (RPS2)
Ileum	ENSGALT00000008918 (TBL3)	ENSGALT00000008938 (ENSGALG00000005572)
Ileum	ENSGALT00000009864 (PLK1)	ENSGALT00000043152 (ERN2)
Ileum	ENSGALT00000010182 (KDM8)	ENSGALT00000010199 (NSMCE1)
Ileum	ENSGALT00000105945 (GNPTG)	ENSGALT00000010385 (TSR3)
Ileum	ENSGALT00000096336 (GNPTG)	ENSGALT00000010385 (TSR3)
Ileum	ENSGALT00000010394 (GNPTG)	ENSGALT00000010385 (TSR3)
Ileum	ENSGALT00000011412 (METTL9)	ENSGALT00000042629 (IGSF6)
Ileum	ENSGALT00000043053 (SNRNP25)	ENSGALT00000028385 (POLR3K)
Ileum	ENSGALT00000090507 (VASN)	ENSGALT00000080412 (CORO7)
Ileum	ENSGALT00000015164 (IFT140)	ENSGALT00000096436 (TMEM204)
Ileum	ENSGALT00000003152 (GPRC5B)	ENSGALT00000045802 (IQCK)
Ileum	ENSGALT00000060965 (ENSGALG00000042810)	ENSGALT00000045802 (IQCK)
Ileum	ENSGALT00000029798 (ENSGALG00000002042)	ENSGALT00000045802 (IQCK)
Ileum	ENSGALT00000068361 (PI4KA)	ENSGALT00000063276 (SERPIND1)
Ileum	ENSGALT00000102823 (ENSGALG00000048316)	ENSGALT00000090516 (HIC2)
Ileum	ENSGALT00000095976 (MRPL40)	ENSGALT00000077327 (HIRA)
Ileum	ENSGALT00000098425 (COMT)	ENSGALT00000107088 (TXNRD2)
Ileum	ENSGALT00000005160 (EIF2B1)	ENSGALT00000005224 (DDX55)
Ileum	ENSGALT00000060434 (TCTN1)	ENSGALT00000007260 (HVCN1)
Ileum	ENSGALT00000082206 (ENSGALG00000031240)	ENSGALT00000007407 (BRAP)
Ileum	ENSGALT00000007523 (ENSGALG00000004725)	ENSGALT00000007407 (BRAP)
Ileum	ENSGALT00000009009 (SRRD)	ENSGALT00000008976 (HPS4)
Ileum	ENSGALT00000106894 (ENSGALG00000049331)	ENSGALT00000011276 (RNF5)
Ileum	ENSGALT00000012619 (PES1)	ENSGALT00000101641 (TCN2)
Ileum	ENSGALT00000104621 (ENSGALG00000053730)	ENSGALT00000046723 (ENSGALG00000049208)
Ileum	ENSGALT00000097213 (ENSGALG00000048880)	ENSGALT00000046723 (ENSGALG00000049208)
Ileum	ENSGALT00000091078 (ENSGALG00000047380)	ENSGALT00000046723 (ENSGALG00000049208)
Ileum	ENSGALT00000093088 (ENSGALG00000047380)	ENSGALT00000046723 (ENSGALG00000049208)
Ileum	ENSGALT00000042868 (BG8)	ENSGALT00000060138 (TRIM7.2)
Ileum	ENSGALT00000095967 (ENSGALG00000046794)	ENSGALT00000060138 (TRIM7.2)
Ileum	ENSGALT00000075892 (KIFC1)	ENSGALT00000060138 (TRIM7.2)
Ileum	ENSGALT00000074567 (ZNF692)	ENSGALT00000060138 (TRIM7.2)
Ileum	ENSGALT00000091470 (FLOT1)	ENSGALT00000076672 (TUBB)
Ileum	ENSGALT00000076895 (DPP7)	ENSGALT00000106784 (ENSGALG00000047814)
Ileum	ENSGALT00000091355 (ENSGALG00000050552)	ENSGALT00000073089 (CLIC3)
Ileum	ENSGALT00000098363 (ENSGALG00000050552)	ENSGALT00000073089 (CLIC3)
Ileum	ENSGALT00000014314 (RPL12)	ENSGALT00000014334 (LRSAM1)
Ileum	ENSGALT00000067722 (RPL12)	ENSGALT00000014334 (LRSAM1)
Ileum	ENSGALT00000080263 (ENSGALG00000034426)	ENSGALT00000011395 (ASTN2)
Ileum	ENSGALT00000097711 (ENSGALG00000042325)	ENSGALT00000007637 (C17H9orf16)
Ileum	ENSGALT00000054954 (ENSGALG00000042325)	ENSGALT00000007637 (C17H9orf16)
Ileum	ENSGALT00000039770 (SPTAN1)	ENSGALT00000007489 (WDR34)
Ileum	ENSGALT00000089974 (NTMT1)	ENSGALT00000108244 (ASB6)
Ileum	ENSGALT00000072855 (USP20)	ENSGALT00000006601 (C9orf78)
Ileum	ENSGALT00000005964 (POMT1)	ENSGALT00000005921 (UCK1)
Ileum	ENSGALT00000087416 (RPL7A)	ENSGALT00000005076 (MED22)
Ileum	ENSGALT00000005036 (ENSGALG00000003175)	ENSGALT00000071842 (REXO4)
Ileum	ENSGALT00000094763 (GSN)	ENSGALT00000034894 (STOM)
Ileum	ENSGALT00000002038 (MRRFP1)	ENSGALT00000044500 (RBM18)
Ileum	ENSGALT00000001858 (RABGAP1)	ENSGALT00000063306 (ZBTB26)
Ileum	ENSGALT00000092995 (SCAI)	ENSGALT00000057772 (RPL35)
Ileum	ENSGALT00000057653 (RABEPK)	ENSGALT00000001495 (PPP6C)
Ileum	ENSGALT00000092370 (RALGPS1)	ENSGALT00000001362 (ANGPTL2)
Ileum	ENSGALT00000049922 (RALGPS1)	ENSGALT00000001362 (ANGPTL2)
Ileum	ENSGALT00000084390 (ENSGALG00000024335)	ENSGALT00000041141 (ENSGALG00000050425)
Ileum	ENSGALT00000081425 (ADPRM)	ENSGALT00000091102 (SCO1)
Ileum	ENSGALT00000002182 (B3GNTL1)	ENSGALT00000039250 (TBCD)
Ileum	ENSGALT00000093480 (OGFOD3)	ENSGALT00000039218 (UTS2R)
Ileum	ENSGALT00000073781 (SRSF2)	ENSGALT00000002759 (METTL23)
Ileum	ENSGALT00000003814 (RECQL5)	ENSGALT00000003817 (SMIM5)
Ileum	ENSGALT00000004493 (DCXR)	ENSGALT00000053553 (RAC3)
Ileum	ENSGALT00000101403 (ENSGALG00000046212)	ENSGALT00000005570 (POLG2)
Ileum	ENSGALT00000086598 (ENSGALG00000046212)	ENSGALT00000005570 (POLG2)
Ileum	ENSGALT00000006665 (ARSG)	ENSGALT00000006617 (SLC16A6)
Ileum	ENSGALT00000006971 (MAP2K6)	ENSGALT00000098118 (ENSGALG00000052445)
Ileum	ENSGALT00000053808 (COG1)	ENSGALT00000073416 (FAM104A)
Ileum	ENSGALT00000105119 (ENSGALG00000047043)	ENSGALT00000011630 (PGS1)
Ileum	ENSGALT00000102346 (ENSGALG00000049911)	ENSGALT00000011710 (ALYREF)
Ileum	ENSGALT00000031388 (ENSGALG00000019761)	ENSGALT00000038263 (ACSF2)
Ileum	ENSGALT00000012890 (KCTD2)	ENSGALT00000084498 (ATP5PD)
Ileum	ENSGALT00000012920 (SLC16A5)	ENSGALT00000066580 (HN1)
Ileum	ENSGALT00000012930 (ARMC7)	ENSGALT00000066580 (HN1)
Ileum	ENSGALT00000080909 (MRPS7)	ENSGALT00000044481 (MIF4GD)
Ileum	ENSGALT00000085665 (MRPS7)	ENSGALT00000044481 (MIF4GD)
Ileum	ENSGALT00000083321 (ENSGALG00000052672)	ENSGALT00000073675 (ENSGALG00000033320)
Ileum	ENSGALT00000053956 (ENSGALG00000037051)	ENSGALT00000073675 (ENSGALG00000033320)
Ileum	ENSGALT00000049551 (ENSGALG00000037051)	ENSGALT00000073675 (ENSGALG00000033320)
Ileum	ENSGALT00000102336 (ENSGALG00000001049)	ENSGALT00000107005 (MTMR4)
Ileum	ENSGALT00000002870 (LRWD1)	ENSGALT00000053454 (POLR2J)
Ileum	ENSGALT00000088357 (TMEM120A)	ENSGALT00000097118 (POR)
Ileum	ENSGALT00000003859 (CCT6A)	ENSGALT00000065653 (PSPH)
Ileum	ENSGALT00000003887 (ENSGALG00000002463)	ENSGALT00000003916 (PHKG1)
Ileum	ENSGALT00000004993 (SRR)	ENSGALT00000058580 (SMG6)
Ileum	ENSGALT00000007038 (TTC19)	ENSGALT00000039555 (ZSWIM7)
Ileum	ENSGALT00000007345 (P2RX5)	ENSGALT00000084902 (EMC6)
Ileum	ENSGALT00000008627 (ZNHIT3)	ENSGALT00000090994 (MYO19)
Ileum	ENSGALT00000050118 (EVI2A)	ENSGALT00000055292 (NF1)
Ileum	ENSGALT00000068634 (ENSGALG00000035589)	ENSGALT00000055292 (NF1)
Ileum	ENSGALT00000008974 (OMG)	ENSGALT00000055292 (NF1)
Ileum	ENSGALT00000009146 (TMEM97)	ENSGALT00000086153 (IFT20)
Ileum	ENSGALT00000073663 (ENSGALG00000038330)	ENSGALT00000090715 (NOS3)
Ileum	ENSGALT00000008701 (JMJD4)	ENSGALT00000103352 (SNAP47)
Ileum	ENSGALT00000105954 (ENSGALG00000053469)	ENSGALT00000054981 (PRKAG2)
Ileum	ENSGALT00000059013 (PARD3)	ENSGALT00000107234 (ENSGALG00000052446)
Ileum	ENSGALT00000077652 (ENSGALG00000048869)	ENSGALT00000103198 (ENSGALG00000053860)
Ileum	ENSGALT00000015413 (RBM48)	ENSGALT00000015424 (EFCAB1)
Ileum	ENSGALT00000065275 (CBX3)	ENSGALT00000089553 (HNRNPA2B1)
Ileum	ENSGALT00000099520 (ENSGALG00000052473)	ENSGALT00000064064 (JAZF1)
Ileum	ENSGALT00000081699 (METTL6)	ENSGALT00000065313 (EAF1)
Ileum	ENSGALT00000057417 (METTL6)	ENSGALT00000065313 (EAF1)
Ileum	ENSGALT00000102095 (METTL6)	ENSGALT00000065313 (EAF1)
Ileum	ENSGALT00000098055 (ACKR4)	ENSGALT00000054111 (ACAD11)
Ileum	ENSGALT00000108370 (ENSGALG00000046643)	ENSGALT00000072548 (GPR141)
Ileum	ENSGALT00000045583 (ENSGALG00000054420)	ENSGALT00000077586 (BPHL)
Ileum	ENSGALT00000091120 (PIGN)	ENSGALT00000021033 (RELCH)
Ileum	ENSGALT00000096386 (ANKH)	ENSGALT00000096788 (ENSGALG00000055096)
Ileum	ENSGALT00000101080 (ENSGALG00000049889)	ENSGALT00000071221 (TRIO)
Ileum	ENSGALT00000075665 (ATPSCKMT)	ENSGALT00000021286 (CCT5)
Ileum	ENSGALT00000046536 (FASTKD3)	ENSGALT00000079280 (MTRR)
Ileum	ENSGALT00000021485 (ENSGALG00000013155)	ENSGALT00000021487 (ZNF830)
Ileum	ENSGALT00000092899 (CCDC127)	ENSGALT00000021508 (SDHA)
Ileum	ENSGALT00000021913 (TEX10)	ENSGALT00000030979 (INVS)
Ileum	ENSGALT00000097304 (MBP)	ENSGALT00000104866 (ENSGALG00000053485)
Ileum	ENSGALT00000046248 (TERF1)	ENSGALT00000047667 (SBSPON)
Ileum	ENSGALT00000069458 (E2F5)	ENSGALT00000092993 (RBIS)
Ileum	ENSGALT00000059601 (PTDSS1)	ENSGALT00000082823 (MTERF3)
Ileum	ENSGALT00000065707 (DCAF13)	ENSGALT00000048847 (SLC25A32)
Ileum	ENSGALT00000088981 (ENSGALG00000046517)	ENSGALT00000055882 (CSMD3)
Ileum	ENSGALT00000048868 (NDUFB9)	ENSGALT00000053515 (TATDN1)
Ileum	ENSGALT00000098075 (ENSGALG00000053276)	ENSGALT00000092458 (ENSGALG00000049289)
Ileum	ENSGALT00000002384 (NFS1)	ENSGALT00000085125 (ROMO1)
Ileum	ENSGALT00000004812 (PXMP4)	ENSGALT00000056181 (ZNF341)
Ileum	ENSGALT00000006537 (ENSGALG00000004110)	ENSGALT00000006521 (STK4)
Ileum	ENSGALT00000085389 (SIRPA)	ENSGALT00000074450 (ENSGALG00000029485)
Ileum	ENSGALT00000010982 (TTI1)	ENSGALT00000010979 (RPRD1B)
Ileum	ENSGALT00000011080 (ZSWIM3)	ENSGALT00000011074 (ACOT8)
Ileum	ENSGALT00000073180 (CTSZ)	ENSGALT00000095073 (GNAS)
Ileum	ENSGALT00000076040 (GCNT7)	ENSGALT00000012492 (RTFDC1)
Ileum	ENSGALT00000012508 (GCNT7)	ENSGALT00000012492 (RTFDC1)
Ileum	ENSGALT00000091515 (ENSGALG00000052083)	ENSGALT00000101786 (PTPN1)
Ileum	ENSGALT00000092014 (TNFRSF9)	ENSGALT00000083827 (PARK7)
Ileum	ENSGALT00000067446 (KLHL21)	ENSGALT00000076662 (PHF13)
Ileum	ENSGALT00000001015 (RPL22)	ENSGALT00000063844 (RNF207)
Ileum	ENSGALT00000001764 (PANK4)	ENSGALT00000001776 (KBP)
Ileum	ENSGALT00000084687 (PEX10)	ENSGALT00000051118 (RER1)
Ileum	ENSGALT00000002586 (INTS11)	ENSGALT00000002613 (ENSGALG00000001701)
Ileum	ENSGALT00000006360 (MRTO4)	ENSGALT00000006382 (AKR7L)
Ileum	ENSGALT00000086802 (MAD2L2)	ENSGALT00000100757 (ENSGALG00000004646)
Ileum	ENSGALT00000007392 (MAD2L2)	ENSGALT00000100757 (ENSGALG00000004646)
Ileum	ENSGALT00000093096 (SVBP)	ENSGALT00000043695 (ENSGALG00000025800)
Ileum	ENSGALT00000101019 (ENSGALG00000046740)	ENSGALT00000070374 (XPO7)
Ileum	ENSGALT00000002549 (MAK16)	ENSGALT00000002520 (TTI2)
Ileum	ENSGALT00000046784 (IKBKB)	ENSGALT00000087080 (ENSGALG00000041463)
Ileum	ENSGALT00000097651 (ENSGALG00000049780)	ENSGALT00000054933 (CIAO1)
Ileum	ENSGALT00000022505 (PCYOX1)	ENSGALT00000040525 (SNRPGP15)
Ileum	ENSGALT00000029510 (OGDH)	ENSGALT00000093024 (ENSGALG00000047157)
Ileum	ENSGALT00000094484 (OGDH)	ENSGALT00000093024 (ENSGALG00000047157)
Ileum	ENSGALT00000003067 (GNL2)	ENSGALT00000003106 (ENSGALG00000001996)
Ileum	ENSGALT00000049065 (ENSGALG00000037052)	ENSGALT00000106549 (ENSGALG00000046649)
Ileum	ENSGALT00000005575 (RBBP4)	ENSGALT00000005560 (ZBTB8OS)
Ileum	ENSGALT00000090762 (AZIN2)	ENSGALT00000005690 (AK2)
Ileum	ENSGALT00000086666 (ENSGALG00000045705)	ENSGALT00000074039 (HMBS)
Ileum	ENSGALT00000082329 (HYLS1)	ENSGALT00000041115 (RPUSD4)
Ileum	ENSGALT00000070835 (HYLS1)	ENSGALT00000041115 (RPUSD4)
Ileum	ENSGALT00000046807 (SRPRA)	ENSGALT00000050519 (EI24)
Ileum	ENSGALT00000089428 (ENSGALG00000044002)	ENSGALT00000040801 (PDZD3)
Ileum	ENSGALT00000019425 (TAGLN)	ENSGALT00000050114 (PCSK7)
Ileum	ENSGALT00000012488 (TRAPPC4)	ENSGALT00000012476 (ENSGALG00000007699)
Ileum	ENSGALT00000103144 (PIH1D2)	ENSGALT00000012801 (ENSGALG00000007882)
Ileum	ENSGALT00000087056 (NAXE)	ENSGALT00000102130 (GPATCH4)
Ileum	ENSGALT00000106295 (LAMTOR2)	ENSGALT00000072558 (UBQLN4)
Ileum	ENSGALT00000067623 (LAMTOR2)	ENSGALT00000072558 (UBQLN4)
Ileum	ENSGALT00000052400 (ENSGALG00000037802)	ENSGALT00000097066 (ENSGALG00000050392)
Ileum	ENSGALT00000050437 (ENSGALG00000037441)	ENSGALT00000091570 (ENSGALG00000046828)
Ileum	ENSGALT00000004270 (CHRNB2)	ENSGALT00000063528 (UBE2Q1)
Ileum	ENSGALT00000045737 (SNAPIN)	ENSGALT00000086502 (ILF2)
Ileum	ENSGALT00000076158 (NR1I3)	ENSGALT00000078411 (TOMM40L)
Ileum	ENSGALT00000001686 (PFKFB2)	ENSGALT00000064315 (YOD1)
Ileum	ENSGALT00000002207 (ATP5PB)	ENSGALT00000053742 (WDR77)
Ileum	ENSGALT00000002368 (MOV10)	ENSGALT00000002385 (RHOC)
Ileum	ENSGALT00000002807 (MAGI3)	ENSGALT00000002857 (PHTF1)
Ileum	ENSGALT00000045280 (DCLRE1B)	ENSGALT00000057570 (AP4B1)
Ileum	ENSGALT00000087884 (ENSGALG00000045738)	ENSGALT00000094502 (PCGF2)
Ileum	ENSGALT00000062155 (ERBB2)	ENSGALT00000045413 (MIEN1)
Ileum	ENSGALT00000005478 (CNP)	ENSGALT00000075442 (DNAJC7)
Ileum	ENSGALT00000044950 (NKIRAS2)	ENSGALT00000075442 (DNAJC7)
Ileum	ENSGALT00000005068 (MLX)	ENSGALT00000046721 (PSMC3IP)
Ileum	ENSGALT00000087871 (PSME3)	ENSGALT00000004706 (BECN1)
Ileum	ENSGALT00000001057 (APBA3)	ENSGALT00000045101 (MRPL54)
Ileum	ENSGALT00000102592 (MICOS13)	ENSGALT00000020974 (HSD11B1L)
Ileum	ENSGALT00000102211 (CFD)	ENSGALT00000003081 (MED16)
Ileum	ENSGALT00000097275 (FKBP8)	ENSGALT00000076102 (KXD1)
Ileum	ENSGALT00000080507 (RAB3A)	ENSGALT00000090385 (MPV17L2)
Ileum	ENSGALT00000071359 (VRK2)	ENSGALT00000067764 (FANCL)
Ileum	ENSGALT00000043204 (ASB3)	ENSGALT00000013322 (CHAC2)
Ileum	ENSGALT00000014587 (EPCAM)	ENSGALT00000014542 (FBXO11)
Ileum	ENSGALT00000014390 (MDH1)	ENSGALT00000014402 (WDPCP)
Ileum	ENSGALT00000057642 (CEP68)	ENSGALT00000083942 (RAB1B)
Ileum	ENSGALT00000033264 (SNX5)	ENSGALT00000076330 (MGME1)
Ileum	ENSGALT00000022442 (GALM)	ENSGALT00000077309 (ENSGALG00000038528)
Ileum	ENSGALT00000052584 (GALM)	ENSGALT00000077309 (ENSGALG00000038528)
Ileum	ENSGALT00000056217 (GALM)	ENSGALT00000077309 (ENSGALG00000038528)
Ileum	ENSGALT00000076325 (ESRRG)	ENSGALT00000050657 (ENSGALG00000041996)
Ileum	ENSGALT00000038479 (NSL1)	ENSGALT00000031933 (TATDN3)
Ileum	ENSGALT00000016003 (INTS7)	ENSGALT00000015990 (DTL)
Ileum	ENSGALT00000016247 (PRKCE)	ENSGALT00000105633 (ENSGALG00000047946)
Ileum	ENSGALT00000016260 (RHOQ)	ENSGALT00000067583 (PIGF)
Ileum	ENSGALT00000092997 (ENSGALG00000049568)	ENSGALT00000051293 (MCFD2)
Ileum	ENSGALT00000107158 (RBKS)	ENSGALT00000016306 (BRE)
Ileum	ENSGALT00000087776 (RBKS)	ENSGALT00000107891 (MRPL33)
Ileum	ENSGALT00000016762 (ENSGALG00000010303)	ENSGALT00000106840 (MAD2L1BP)
Ileum	ENSGALT00000017183 (EIF2AK2)	ENSGALT00000064824 (GPATCH11)
Ileum	ENSGALT00000097478 (CEBPZOS)	ENSGALT00000066488 (CEBPZ)
Ileum	ENSGALT00000101864 (ENSGALG00000054084)	ENSGALT00000017370 (DESI2)
Ileum	ENSGALT00000022610 (B3GALNT2)	ENSGALT00000022606 (ENSGALG00000013950)
Ileum	ENSGALT00000052694 (PHF10)	ENSGALT00000018251 (C3H6orf120)
Ileum	ENSGALT00000018857 (PRKN)	ENSGALT00000089338 (PACRG)
Ileum	ENSGALT00000019010 (TCP1)	ENSGALT00000019060 (ACAT2)
Ileum	ENSGALT00000097909 (TMEM181)	ENSGALT00000099419 (DYNLT1)
Ileum	ENSGALT00000067131 (ENSGALG00000038188)	ENSGALT00000097646 (AKAP7)
Ileum	ENSGALT00000024014 (MCM9)	ENSGALT00000073491 (ASF1A)
Ileum	ENSGALT00000024100 (ZUP1)	ENSGALT00000024093 (KPNA5)
Ileum	ENSGALT00000106190 (RTN4IP1)	ENSGALT00000102103 (ENSGALG00000047141)
Ileum	ENSGALT00000045345 (BORCS6)	ENSGALT00000025447 (PNRC1)
Ileum	ENSGALT00000025553 (ME1)	ENSGALT00000025556 (RWDD2A)
Ileum	ENSGALT00000101074 (ENSGALG00000053695)	ENSGALT00000060276 (KCNQ5)
Ileum	ENSGALT00000096920 (ANGPT2)	ENSGALT00000086126 (MCPH1)
Ileum	ENSGALT00000026434 (TRAPPC12)	ENSGALT00000026430 (TSSC1)
Ileum	ENSGALT00000107871 (ENSGALG00000049474)	ENSGALT00000026473 (MBOAT2)
Ileum	ENSGALT00000093705 (ATP6V1C2)	ENSGALT00000026538 (PDIA6)
Ileum	ENSGALT00000026572 (GEN1)	ENSGALT00000026569 (SMC6)
Ileum	ENSGALT00000026714 (HADHB)	ENSGALT00000026684 (HADHA)
Ileum	ENSGALT00000077870 (RUNX2)	ENSGALT00000026959 (SUPT3H)
Ileum	ENSGALT00000060697 (IMP3)	ENSGALT00000026970 (PLA2G7)
Ileum	ENSGALT00000073056 (FARSA)	ENSGALT00000067189 (CALR)
Ileum	ENSGALT00000073335 (ATP13A1)	ENSGALT00000060969 (MVB12A)
Ileum	ENSGALT00000098366 (ENSGALG00000048625)	ENSGALT00000100976 (ENSGALG00000054294)
Ileum	ENSGALT00000083234 (ENSGALG00000044436)	ENSGALT00000088455 (ENSGALG00000044817)
Ileum	ENSGALT00000082857 (THAP7)	ENSGALT00000064260 (ENSGALG00000034772)
Ileum	ENSGALT00000082545 (NFKBIB)	ENSGALT00000047004 (SIRT2)
Ileum	ENSGALT00000104888 (SAE1)	ENSGALT00000100677 (ENSGALG00000049505)
Ileum	ENSGALT00000104343 (SAE1)	ENSGALT00000100677 (ENSGALG00000049505)
Ileum	ENSGALT00000082408 (MARS)	ENSGALT00000050399 (ENSGALG00000031518)
Ileum	ENSGALT00000047125 (MARS)	ENSGALT00000050399 (ENSGALG00000031518)
Ileum	ENSGALT00000052009 (CSAD)	ENSGALT00000086793 (ZNF740)
Ileum	ENSGALT00000006376 (AIFM1)	ENSGALT00000006401 (MARS2)
Ileum	ENSGALT00000074919 (ZDHHC9)	ENSGALT00000040562 (ENSGALG00000024039)
Ileum	ENSGALT00000006172 (ERCC6L)	ENSGALT00000040547 (ENSGALG00000003920)
Ileum	ENSGALT00000007959 (TIMM8A)	ENSGALT00000007977 (ENSGALG00000004975)
Ileum	ENSGALT00000092964 (ENSGALG00000048179)	ENSGALT00000013477 (ATG4A)
Ileum	ENSGALT00000080145 (NRK)	ENSGALT00000107288 (ENSGALG00000051675)
Ileum	ENSGALT00000014591 (NRK)	ENSGALT00000107288 (ENSGALG00000051675)
Ileum	ENSGALT00000014910 (IDS)	ENSGALT00000088976 (ENSGALG00000029286)
Ileum	ENSGALT00000015353 (RXFP1)	ENSGALT00000096658 (C4orf46)
Ileum	ENSGALT00000015372 (ETFDH)	ENSGALT00000015382 (PPID)
Ileum	ENSGALT00000047010 (RAPGEF2)	ENSGALT00000093685 (ENSGALG00000050541)
Ileum	ENSGALT00000078753 (KLHL2)	ENSGALT00000028637 (7SK)
Ileum	ENSGALT00000067980 (KLHL2)	ENSGALT00000028637 (7SK)
Ileum	ENSGALT00000104517 (ENSGALG00000048950)	ENSGALT00000016223 (ZNF827)
Ileum	ENSGALT00000087558 (MAB21L2)	ENSGALT00000056918 (LRBA)
Ileum	ENSGALT00000107607 (SCLT1)	ENSGALT00000016460 (CDKL2)
Ileum	ENSGALT00000098797 (SCLT1)	ENSGALT00000016460 (CDKL2)
Ileum	ENSGALT00000067326 (GTF2E2)	ENSGALT00000093271 (SMIM18)
Ileum	ENSGALT00000016727 (GTF2E2)	ENSGALT00000093271 (SMIM18)
Ileum	ENSGALT00000016820 (CNOT6L)	ENSGALT00000092541 (MRPL1)
Ileum	ENSGALT00000068504 (ENSGALG00000042001)	ENSGALT00000051420 (PYURF)
Ileum	ENSGALT00000032215 (CENPU)	ENSGALT00000038264 (PRIMPOL)
Ileum	ENSGALT00000100963 (CASP3)	ENSGALT00000038264 (PRIMPOL)
Ileum	ENSGALT00000095180 (RWDD4)	ENSGALT00000017333 (TRAPPC11)
Ileum	ENSGALT00000097773 (CEP44)	ENSGALT00000017505 (FBXO8)
Ileum	ENSGALT00000092045 (TMEM150C)	ENSGALT00000057256 (ENOPH1)
Ileum	ENSGALT00000038016 (HNRNPDL)	ENSGALT00000057256 (ENOPH1)
Ileum	ENSGALT00000047514 (HNRNPDL)	ENSGALT00000057256 (ENOPH1)
Ileum	ENSGALT00000068418 (HNRNPDL)	ENSGALT00000057256 (ENOPH1)
Ileum	ENSGALT00000038003 (MRPS18C)	ENSGALT00000018281 (FAM175A)
Ileum	ENSGALT00000101063 (IGFBP7)	ENSGALT00000037965 (POLR2B)
Ileum	ENSGALT00000101176 (ENSGALG00000053080)	ENSGALT00000037951 (HOPX)
Ileum	ENSGALT00000099383 (NUDT6)	ENSGALT00000085206 (SPATA5)
Ileum	ENSGALT00000054115 (MTMR7)	ENSGALT00000022194 (VPS37A)
Ileum	ENSGALT00000070225 (USP46)	ENSGALT00000096732 (ENSGALG00000054475)
Ileum	ENSGALT00000023118 (RFC1)	ENSGALT00000022768 (ENSGALG00000049347)
Ileum	ENSGALT00000056296 (FAM184B)	ENSGALT00000091312 (MED28)
Ileum	ENSGALT00000100752 (ENSGALG00000052156)	ENSGALT00000078117 (ENSGALG00000041205)
Ileum	ENSGALT00000079016 (RAD9A)	ENSGALT00000051728 (PPP1CA)
Ileum	ENSGALT00000073888 (TMEM138)	ENSGALT00000069064 (CYB561A3)
Ileum	ENSGALT00000086995 (TMEM138)	ENSGALT00000069064 (CYB561A3)
Ileum	ENSGALT00000050879 (SDHAF2)	ENSGALT00000071357 (CPSF7)
Ileum	ENSGALT00000077591 (ENSGALG00000034939)	ENSGALT00000069733 (AIP)
Ileum	ENSGALT00000066589 (CEND1)	ENSGALT00000086673 (NLRP3)
Ileum	ENSGALT00000071261 (PDDC1)	ENSGALT00000086673 (NLRP3)
Ileum	ENSGALT00000049686 (C15orf62)	ENSGALT00000061124 (DNAJC17)
Ileum	ENSGALT00000019813 (ELP4)	ENSGALT00000031814 (IMMP1L)
Ileum	ENSGALT00000008490 (PPFIBP2)	ENSGALT00000047322 (CYB5R2)
Ileum	ENSGALT00000054383 (CALCA)	ENSGALT00000009745 (CYP2R1)
Ileum	ENSGALT00000099689 (ENSGALG00000053062)	ENSGALT00000098638 (ENSGALG00000054407)
Ileum	ENSGALT00000065948 (ENSGALG00000030338)	ENSGALT00000011857 (CTNND1)
Ileum	ENSGALT00000013143 (CELF1)	ENSGALT00000013133 (PTPMT1)
Ileum	ENSGALT00000013997 (RTF1)	ENSGALT00000013981 (NDUFAF1)
Ileum	ENSGALT00000015501 (ARG2)	ENSGALT00000015509 (VTI1B)
Ileum	ENSGALT00000097876 (ENSGALG00000052965)	ENSGALT00000079778 (C5H15orf41)
Ileum	ENSGALT00000016576 (COQ6)	ENSGALT00000016585 (ENTPD5)
Ileum	ENSGALT00000037710 (TTLL5)	ENSGALT00000081527 (ENSGALG00000034354)
Ileum	ENSGALT00000089352 (TTLL5)	ENSGALT00000081527 (ENSGALG00000034354)
Ileum	ENSGALT00000092288 (GSTZ1)	ENSGALT00000073797 (POMT2)
Ileum	ENSGALT00000055042 (SLIRP)	ENSGALT00000017099 (SNW1)
Ileum	ENSGALT00000102633 (ADCK1)	ENSGALT00000017099 (SNW1)
Ileum	ENSGALT00000094557 (TDP1)	ENSGALT00000032540 (EFCAB11)
Ileum	ENSGALT00000017538 (CPSF2)	ENSGALT00000037601 (NDUFB1)
Ileum	ENSGALT00000101237 (GSKIP)	ENSGALT00000066952 (ATG2B)
Ileum	ENSGALT00000057576 (BTBD6)	ENSGALT00000019132 (BRF1)
Ileum	ENSGALT00000079178 (EXOC5)	ENSGALT00000019765 (AP5M1)
Ileum	ENSGALT00000020080 (ATP5S)	ENSGALT00000020088 (CDKL1)
Ileum	ENSGALT00000074859 (ATP5S)	ENSGALT00000020088 (CDKL1)
Ileum	ENSGALT00000020162 (ATL1)	ENSGALT00000020164 (SAV1)
Ileum	ENSGALT00000032445 (ENSGALG00000020342)	ENSGALT00000020196 (PYGL)
Ileum	ENSGALT00000020371 (SOUL)	ENSGALT00000057113 (FANCM)
Ileum	ENSGALT00000070716 (FKBP3)	ENSGALT00000057113 (FANCM)
Ileum	ENSGALT00000078099 (ENSGALG00000040737)	ENSGALT00000071346 (ENSGALG00000043130)
Ileum	ENSGALT00000052751 (ENSGALG00000040055)	ENSGALT00000071346 (ENSGALG00000043130)
Ileum	ENSGALT00000103622 (ENSGALG00000040737)	ENSGALT00000071346 (ENSGALG00000043130)
Ileum	ENSGALT00000084769 (ENSGALG00000031497)	ENSGALT00000071346 (ENSGALG00000043130)
Ileum	ENSGALT00000003306 (PARG)	ENSGALT00000003257 (ENSGALG00000002089)
Ileum	ENSGALT00000004372 (DNAJC12)	ENSGALT00000004359 (SIRT1)
Ileum	ENSGALT00000089611 (ASCC1)	ENSGALT00000007029 (ANAPC16)
Ileum	ENSGALT00000007929 (POLR3A)	ENSGALT00000007776 (RPS24)
Ileum	ENSGALT00000012071 (COX15)	ENSGALT00000046257 (CUTC)
Ileum	ENSGALT00000051958 (RRP12)	ENSGALT00000039466 (PGAM1)
Ileum	ENSGALT00000013413 (TAF5)	ENSGALT00000051809 (USMG5)
Ileum	ENSGALT00000103201 (SFR1)	ENSGALT00000082951 (ENSGALG00000036896)
Ileum	ENSGALT00000107684 (PDCD4)	ENSGALT00000057879 (BBIP1)
Ileum	ENSGALT00000055818 (PDCD4)	ENSGALT00000057879 (BBIP1)
Ileum	ENSGALT00000107236 (ENO4)	ENSGALT00000107793 (SHTN1)
Ileum	ENSGALT00000108109 (DOCK1)	ENSGALT00000074191 (INSYN2A)
Ileum	ENSGALT00000090690 (ENSGALG00000049429)	ENSGALT00000015921 (CLRN3)
Ileum	ENSGALT00000101349 (ENSGALG00000049429)	ENSGALT00000015921 (CLRN3)
Ileum	ENSGALT00000090535 (ORMDL1)	ENSGALT00000075877 (PMS1)
Ileum	ENSGALT00000060438 (OSGEPL1)	ENSGALT00000075877 (PMS1)
Ileum	ENSGALT00000013388 (NIF3L1)	ENSGALT00000103811 (PPIL3)
Ileum	ENSGALT00000070770 (PLEKHM3)	ENSGALT00000013828 (CCNYL1)
Ileum	ENSGALT00000014220 (ENSGALG00000008738)	ENSGALT00000080101 (CYP20A1)
Ileum	ENSGALT00000015749 (METTL5)	ENSGALT00000015751 (SSB)
Ileum	ENSGALT00000072293 (PTPRN)	ENSGALT00000047160 (ENSGALG00000043198)
Ileum	ENSGALT00000018510 (CNPPD1)	ENSGALT00000077523 (ZFAND2B)
Ileum	ENSGALT00000087444 (AAMP)	ENSGALT00000018675 (ARPC2)
Ileum	ENSGALT00000042561 (ENSGALG00000025648)	ENSGALT00000019030 (CLASP1)
Ileum	ENSGALT00000083500 (PARP9)	ENSGALT00000096667 (FAIM)
Ileum	ENSGALT00000090492 (PARP9)	ENSGALT00000096667 (FAIM)
Ileum	ENSGALT00000037868 (GPR39)	ENSGALT00000095849 (LYPD1)
Ileum	ENSGALT00000020527 (TANC1)	ENSGALT00000020533 (WDSUB1)
Ileum	ENSGALT00000003064 (ENSGALG00000001972)	ENSGALT00000003088 (ENSGALG00000001983)
Ileum	ENSGALT00000003258 (GPSM2)	ENSGALT00000003286 (CLCC1)
Ileum	ENSGALT00000106545 (ENSGALG00000054302)	ENSGALT00000053416 (NR5A2)
Ileum	ENSGALT00000105920 (ENSGALG00000054302)	ENSGALT00000053416 (NR5A2)
Ileum	ENSGALT00000091029 (ENSGALG00000054260)	ENSGALT00000053416 (NR5A2)
Ileum	ENSGALT00000098224 (B3GALT2)	ENSGALT00000003897 (CDC73)
Ileum	ENSGALT00000099000 (ENSGALG00000050838)	ENSGALT00000004826 (PRDX6)
Ileum	ENSGALT00000073277 (SCYL3)	ENSGALT00000072136 (C1orf112)
Ileum	ENSGALT00000056245 (METTL18)	ENSGALT00000072136 (C1orf112)
Ileum	ENSGALT00000006824 (ANGPTL1)	ENSGALT00000006794 (RALGPS2)
Ileum	ENSGALT00000052097 (MRPS14)	ENSGALT00000007248 (CACYBP)
Ileum	ENSGALT00000008185 (TPR)	ENSGALT00000008146 (C8H1orf27)
Ileum	ENSGALT00000008474 (LRRC39)	ENSGALT00000008481 (TRMT13)
Ileum	ENSGALT00000095216 (PLPPR5)	ENSGALT00000045311 (PLPPR4)
Ileum	ENSGALT00000017472 (DIO1)	ENSGALT00000077979 (HSPB11)
Ileum	ENSGALT00000038158 (MRPL37)	ENSGALT00000017496 (ENSGALG00000010758)
Ileum	ENSGALT00000055523 (FGGY)	ENSGALT00000038039 (JUN)
Ileum	ENSGALT00000017909 (EFCAB7)	ENSGALT00000044324 (ITGB3BP)
Ileum	ENSGALT00000063906 (GIGYF2)	ENSGALT00000002259 (KCNJ13)
Ileum	ENSGALT00000106269 (ENSGALG00000050118)	ENSGALT00000008913 (ADIPOQ)
Ileum	ENSGALT00000008893 (GPR55)	ENSGALT00000098010 (ENSGALG00000052803)
Ileum	ENSGALT00000108297 (ENSGALG00000053929)	ENSGALT00000100280 (ENSGALG00000047853)
Ileum	ENSGALT00000040843 (MOGAT1)	ENSGALT00000008412 (FARSB)
Ileum	ENSGALT00000072981 (PSMD1)	ENSGALT00000012451 (HTR2B)
Ileum	ENSGALT00000046199 (THPO)	ENSGALT00000013907 (POLR2H)
Ileum	ENSGALT00000015715 (LXN)	ENSGALT00000015688 (GFM1)
Ileum	ENSGALT00000062124 (P2RY13)	ENSGALT00000016895 (MED12L)
Ileum	ENSGALT00000082876 (P2RY14)	ENSGALT00000016895 (MED12L)
Ileum	ENSGALT00000080536 (GPR171)	ENSGALT00000016895 (MED12L)
Ileum	ENSGALT00000104594 (CP)	ENSGALT00000082756 (HPS3)
Ileum	ENSGALT00000064199 (CP)	ENSGALT00000082756 (HPS3)
Ileum	ENSGALT00000095913 (YF5)	ENSGALT00000092163 (ENSGALG00000051188)
Ileum	ENSGALT00000100007 (MED11)	ENSGALT00000098531 (ENSGALG00000049559)
Ileum	ENSGALT00000092795 (COLGALT1)	ENSGALT00000107074 (PRKCSH)
Ileum	ENSGALT00000052116 (ENSGALG00000034584)	ENSGALT00000106921 (ENSGALG00000053757)
Ileum	ENSGALT00000004064 (ENSGALG00000002578)	ENSGALT00000034416 (CA9)
Ileum	ENSGALT00000004088 (ARHGEF39)	ENSGALT00000066276 (ENSGALG00000037611)
Ileum	ENSGALT00000005609 (SKP2)	ENSGALT00000021822 (LMBRD2)
Ileum	ENSGALT00000023719 (SKIV2L2)	ENSGALT00000023722 (PLPP1)
Ileum	ENSGALT00000071193 (SHLD3)	ENSGALT00000023814 (TRIM23)
Ileum	ENSGALT00000023818 (TRAPPC13)	ENSGALT00000023814 (TRIM23)
Ileum	ENSGALT00000089674 (TRAPPC13)	ENSGALT00000023814 (TRIM23)
Ileum	ENSGALT00000038562 (F2RL2)	ENSGALT00000024162 (IQGAP2)
Ileum	ENSGALT00000023330 (CDC37L1)	ENSGALT00000070268 (AK3)
Ileum	ENSGALT00000028137 (OSTF1)	ENSGALT00000077373 (NMRK1)
Ileum	ENSGALT00000050692 (AOPEP)	ENSGALT00000107984 (ENSGALG00000052891)
Ileum	ENSGALT00000037896 (REEP5)	ENSGALT00000000294 (SRP19)
Ileum	ENSGALT00000042951 (SLC26A1)	ENSGALT00000024807 (IDUA)
Ileum	ENSGALT00000097084 (ENSGALG00000047915)	ENSGALT00000107627 (ENSGALG00000050110)
Ileum	ENSGALT00000037630 (ALDOB)	ENSGALT00000100330 (RNF20)
Ileum	ENSGALT00000104756 (IFT74)	ENSGALT00000085539 (ENSGALG00000045028)
Ileum	ENSGALT00000003696 (ATG12)	ENSGALT00000003691 (AP3S1)
Ileum	ENSGALT00000028259 (ENSGALG00000017558)	ENSGALT00000042981 (ENSGALG00000029118)
Ileum	ENSGALT00000106415 (ENSGALG00000017558)	ENSGALT00000042981 (ENSGALG00000029118)
Jejunum	ENSGALT00000013282 (GDI1)	ENSGALT00000092270 (FBXO18)
Jejunum	ENSGALT00000105830 (ENSGALG00000050475)	ENSGALT00000101201 (ENSGALG00000052368)
Jejunum	ENSGALT00000010717 (TMEM243)	ENSGALT00000075153 (DMTF1)
Jejunum	ENSGALT00000013473 (PMPCB)	ENSGALT00000013428 (DNAJC2)
Jejunum	ENSGALT00000013186 (RINT1)	ENSGALT00000104579 (EFCAB10)
Jejunum	ENSGALT00000013062 (HBP1)	ENSGALT00000068162 (COG5)
Jejunum	ENSGALT00000013029 (ENSGALG00000008032)	ENSGALT00000068162 (COG5)
Jejunum	ENSGALT00000039460 (DUS4L)	ENSGALT00000068162 (COG5)
Jejunum	ENSGALT00000038864 (IMMP2L)	ENSGALT00000015449 (LRRN3)
Jejunum	ENSGALT00000102658 (ENSGALG00000048795)	ENSGALT00000058977 (H2A-VI)
Jejunum	ENSGALT00000042655 (HIST1H3H)	ENSGALT00000098465 (ENSGALG00000046904)
Jejunum	ENSGALT00000020100 (ANKRD54)	ENSGALT00000020091 (EIF3L)
Jejunum	ENSGALT00000068252 (C1H12ORF73)	ENSGALT00000052099 (TDG)
Jejunum	ENSGALT00000094657 (ENSGALG00000053936)	ENSGALT00000021284 (BID)
Jejunum	ENSGALT00000085898 (CALD1)	ENSGALT00000102533 (ENSGALG00000051034)
Jejunum	ENSGALT00000059512 (ENSGALG00000014126)	ENSGALT00000084080 (CYB5R1)
Jejunum	ENSGALT00000030515 (ENSGALG00000019262)	ENSGALT00000084080 (CYB5R1)
Jejunum	ENSGALT00000097946 (TSPO)	ENSGALT00000069414 (MCAT)
Jejunum	ENSGALT00000099773 (ENSGALG00000052513)	ENSGALT00000023174 (TSPAN9)
Jejunum	ENSGALT00000023289 (FAM162A)	ENSGALT00000084532 (CCDC58)
Jejunum	ENSGALT00000079058 (NEPRO)	ENSGALT00000085162 (TAF13)
Jejunum	ENSGALT00000091824 (NEPRO)	ENSGALT00000085162 (TAF13)
Jejunum	ENSGALT00000024500 (NEPRO)	ENSGALT00000085162 (TAF13)
Jejunum	ENSGALT00000024577 (NME7)	ENSGALT00000036926 (ATP1B1)
Jejunum	ENSGALT00000094520 (HHLA2)	ENSGALT00000024781 (IFT57)
Jejunum	ENSGALT00000036897 (HHLA2)	ENSGALT00000024781 (IFT57)
Jejunum	ENSGALT00000024861 (ARL13B)	ENSGALT00000096052 (STX19)
Jejunum	ENSGALT00000036866 (ENSGALG00000024077)	ENSGALT00000070424 (MINA)
Jejunum	ENSGALT00000101025 (ENSGALG00000024077)	ENSGALT00000070424 (MINA)
Jejunum	ENSGALT00000024984 (GPR89A)	ENSGALT00000091927 (PDZK1)
Jejunum	ENSGALT00000068147 (JAM2)	ENSGALT00000063486 (ATP5PF)
Jejunum	ENSGALT00000030337 (GATD3A)	ENSGALT00000092229 (ENSGALG00000046714)
Jejunum	ENSGALT00000054938 (CASK)	ENSGALT00000026167 (GPR34)
Jejunum	ENSGALT00000091460 (CASK)	ENSGALT00000026167 (GPR34)
Jejunum	ENSGALT00000064964 (KLHL15)	ENSGALT00000026357 (EIF2S3)
Jejunum	ENSGALT00000107403 (TRAPPC2)	ENSGALT00000026762 (RAB9A)
Jejunum	ENSGALT00000063432 (ENSGALG00000016760)	ENSGALT00000027060 (MITD1)
Jejunum	ENSGALT00000027117 (C1H2ORF49)	ENSGALT00000061172 (FHL2)
Jejunum	ENSGALT00000027271 (GPR183)	ENSGALT00000058077 (UBAC2)
Jejunum	ENSGALT00000036524 (GPR18)	ENSGALT00000058077 (UBAC2)
Jejunum	ENSGALT00000027397 (WBP4)	ENSGALT00000027391 (ELF1)
Jejunum	ENSGALT00000027426 (GTF2F2)	ENSGALT00000027428 (KCTD4)
Jejunum	ENSGALT00000036484 (RB1)	ENSGALT00000027460 (LPAR6)
Jejunum	ENSGALT00000100205 (ENSGALG00000051011)	ENSGALT00000092459 (ENSGALG00000054610)
Jejunum	ENSGALT00000027510 (VPS36)	ENSGALT00000027509 (CKAP2)
Jejunum	ENSGALT00000036465 (SUPT20H)	ENSGALT00000061853 (EXOSC8)
Jejunum	ENSGALT00000090221 (MAB21L1)	ENSGALT00000107478 (NBEA)
Jejunum	ENSGALT00000027620 (MTIF3)	ENSGALT00000027621 (GTF3A)
Jejunum	ENSGALT00000092350 (MTIF3)	ENSGALT00000027621 (GTF3A)
Jejunum	ENSGALT00000091286 (MTIF3)	ENSGALT00000027621 (GTF3A)
Jejunum	ENSGALT00000027829 (VSTM5)	ENSGALT00000027831 (MED17)
Jejunum	ENSGALT00000095300 (FAM168A)	ENSGALT00000086546 (ENSGALG00000044739)
Jejunum	ENSGALT00000078703 (FCHSD2)	ENSGALT00000027999 (ARHGEF17)
Jejunum	ENSGALT00000028004 (FCHSD2)	ENSGALT00000027999 (ARHGEF17)
Jejunum	ENSGALT00000105587 (ENSGALG00000052767)	ENSGALT00000036373 (HBBA)
Jejunum	ENSGALT00000103620 (ENSGALG00000047924)	ENSGALT00000098387 (ENSGALG00000038550)
Jejunum	ENSGALT00000091123 (ENSGALG00000047924)	ENSGALT00000098387 (ENSGALG00000038550)
Jejunum	ENSGALT00000104377 (NEO1)	ENSGALT00000095654 (ENSGALG00000055009)
Jejunum	ENSGALT00000034521 (MCEE)	ENSGALT00000090859 (MPHOSPH10)
Jejunum	ENSGALT00000090436 (APBA2)	ENSGALT00000090859 (MPHOSPH10)
Jejunum	ENSGALT00000053892 (CCPG1)	ENSGALT00000053275 (PIGB)
Jejunum	ENSGALT00000082543 (ENSGALG00000033780)	ENSGALT00000058852 (ITGB1BP3)
Jejunum	ENSGALT00000051937 (ENSGALG00000033780)	ENSGALT00000058852 (ITGB1BP3)
Jejunum	ENSGALT00000091589 (ENSGALG00000033780)	ENSGALT00000058852 (ITGB1BP3)
Jejunum	ENSGALT00000097973 (ENSGALG00000033780)	ENSGALT00000058852 (ITGB1BP3)
Jejunum	ENSGALT00000085495 (POLG)	ENSGALT00000010770 (FANCI)
Jejunum	ENSGALT00000012093 (HACD3)	ENSGALT00000094572 (VWA9)
Jejunum	ENSGALT00000012364 (DIS3L)	ENSGALT00000062194 (TIPIN)
Jejunum	ENSGALT00000038202 (SPG11)	ENSGALT00000013336 (EIF3J)
Jejunum	ENSGALT00000090795 (ENSGALG00000047540)	ENSGALT00000105914 (ENSGALG00000051766)
Jejunum	ENSGALT00000074111 (CIAPIN1)	ENSGALT00000001797 (COQ9)
Jejunum	ENSGALT00000004875 (NUDT21)	ENSGALT00000004848 (OGFOD1)
Jejunum	ENSGALT00000005070 (FBXL8)	ENSGALT00000005064 (TRADD)
Jejunum	ENSGALT00000106471 (DDX28)	ENSGALT00000005388 (DUS2)
Jejunum	ENSGALT00000075864 (ITFG1)	ENSGALT00000006378 (PHKB)
Jejunum	ENSGALT00000087605 (FAAP24)	ENSGALT00000078637 (ENSGALG00000004814)
Jejunum	ENSGALT00000097134 (FAAP24)	ENSGALT00000078637 (ENSGALG00000004814)
Jejunum	ENSGALT00000077917 (CEBPG)	ENSGALT00000007832 (PEPD)
Jejunum	ENSGALT00000051074 (CEBPG)	ENSGALT00000007832 (PEPD)
Jejunum	ENSGALT00000000702 (ZNF276)	ENSGALT00000038833 (VPS9D1)
Jejunum	ENSGALT00000044355 (DEF8)	ENSGALT00000000728 (DBNDD1)
Jejunum	ENSGALT00000000910 (UTP4)	ENSGALT00000058298 (CHTF8)
Jejunum	ENSGALT00000059294 (ENSGALG00000040713)	ENSGALT00000098624 (PDF)
Jejunum	ENSGALT00000001334 (KARS)	ENSGALT00000001325 (TERF2IP)
Jejunum	ENSGALT00000047563 (KARS)	ENSGALT00000096189 (GABARAPL2)
Jejunum	ENSGALT00000003917 (RNF123)	ENSGALT00000105582 (AMIGO3)
Jejunum	ENSGALT00000069748 (PPM1M)	ENSGALT00000006336 (TWF2)
Jejunum	ENSGALT00000007462 (IPPK)	ENSGALT00000007467 (CENPP)
Jejunum	ENSGALT00000007480 (ECM2)	ENSGALT00000007467 (CENPP)
Jejunum	ENSGALT00000007519 (ASPN)	ENSGALT00000007467 (CENPP)
Jejunum	ENSGALT00000045074 (OGN)	ENSGALT00000007467 (CENPP)
Jejunum	ENSGALT00000105794 (ENSGALG00000004955)	ENSGALT00000091165 (TIMP4)
Jejunum	ENSGALT00000007983 (TSEN2)	ENSGALT00000043832 (MKRN2OS)
Jejunum	ENSGALT00000047880 (MGLL)	ENSGALT00000092328 (ENSGALG00000051867)
Jejunum	ENSGALT00000061435 (MGLL)	ENSGALT00000092328 (ENSGALG00000051867)
Jejunum	ENSGALT00000098927 (DALRD3)	ENSGALT00000100367 (WDR6)
Jejunum	ENSGALT00000044814 (SLC25A20)	ENSGALT00000044557 (ARIH2)
Jejunum	ENSGALT00000013716 (CAND2)	ENSGALT00000084738 (SEC13)
Jejunum	ENSGALT00000073565 (IFT122)	ENSGALT00000096664 (MBD4)
Jejunum	ENSGALT00000082836 (ENSGALG00000029346)	ENSGALT00000064754 (ZMAT2)
Jejunum	ENSGALT00000051133 (ENSGALG00000042423)	ENSGALT00000004015 (PCDH12)
Jejunum	ENSGALT00000044150 (INSYN2B)	ENSGALT00000003239 (DOCK2)
Jejunum	ENSGALT00000047574 (SLU7)	ENSGALT00000002291 (PTTG2)
Jejunum	ENSGALT00000050464 (SLU7)	ENSGALT00000002291 (PTTG2)
Jejunum	ENSGALT00000063933 (HNRNPH2)	ENSGALT00000009585 (DGUOK)
Jejunum	ENSGALT00000080575 (HNRNPH2)	ENSGALT00000009585 (DGUOK)
Jejunum	ENSGALT00000088178 (HNRNPH2)	ENSGALT00000009585 (DGUOK)
Jejunum	ENSGALT00000023235 (PHYKPL)	ENSGALT00000083027 (HNRNPAB)
Jejunum	ENSGALT00000006456 (GPR146)	ENSGALT00000103266 (C7orf50)
Jejunum	ENSGALT00000102216 (ENSGALG00000050332)	ENSGALT00000103266 (C7orf50)
Jejunum	ENSGALT00000006465 (GPER1)	ENSGALT00000103266 (C7orf50)
Jejunum	ENSGALT00000008486 (GNG13)	ENSGALT00000057565 (CHTF18)
Jejunum	ENSGALT00000008614 (NARFL)	ENSGALT00000008668 (HAGHL)
Jejunum	ENSGALT00000008778 (NDUFB10)	ENSGALT00000008816 (RPS2)
Jejunum	ENSGALT00000008918 (TBL3)	ENSGALT00000008938 (ENSGALG00000005572)
Jejunum	ENSGALT00000009864 (PLK1)	ENSGALT00000043152 (ERN2)
Jejunum	ENSGALT00000010182 (KDM8)	ENSGALT00000010199 (NSMCE1)
Jejunum	ENSGALT00000096336 (GNPTG)	ENSGALT00000010385 (TSR3)
Jejunum	ENSGALT00000010394 (GNPTG)	ENSGALT00000010385 (TSR3)
Jejunum	ENSGALT00000011412 (METTL9)	ENSGALT00000042629 (IGSF6)
Jejunum	ENSGALT00000043053 (SNRNP25)	ENSGALT00000028385 (POLR3K)
Jejunum	ENSGALT00000090507 (VASN)	ENSGALT00000080412 (CORO7)
Jejunum	ENSGALT00000015164 (IFT140)	ENSGALT00000096436 (TMEM204)
Jejunum	ENSGALT00000003152 (GPRC5B)	ENSGALT00000045802 (IQCK)
Jejunum	ENSGALT00000060965 (ENSGALG00000042810)	ENSGALT00000045802 (IQCK)
Jejunum	ENSGALT00000029798 (ENSGALG00000002042)	ENSGALT00000045802 (IQCK)
Jejunum	ENSGALT00000068361 (PI4KA)	ENSGALT00000063276 (SERPIND1)
Jejunum	ENSGALT00000095976 (MRPL40)	ENSGALT00000077327 (HIRA)
Jejunum	ENSGALT00000098425 (COMT)	ENSGALT00000107088 (TXNRD2)
Jejunum	ENSGALT00000005160 (EIF2B1)	ENSGALT00000005224 (DDX55)
Jejunum	ENSGALT00000007191 (ENSGALG00000004515)	ENSGALT00000086581 (VPS29)
Jejunum	ENSGALT00000060434 (TCTN1)	ENSGALT00000007260 (HVCN1)
Jejunum	ENSGALT00000009009 (SRRD)	ENSGALT00000008976 (HPS4)
Jejunum	ENSGALT00000010857 (RSPH14)	ENSGALT00000010871 (GNAZ)
Jejunum	ENSGALT00000104621 (ENSGALG00000053730)	ENSGALT00000046723 (ENSGALG00000049208)
Jejunum	ENSGALT00000091078 (ENSGALG00000047380)	ENSGALT00000046723 (ENSGALG00000049208)
Jejunum	ENSGALT00000042868 (BG8)	ENSGALT00000060138 (TRIM7.2)
Jejunum	ENSGALT00000095967 (ENSGALG00000046794)	ENSGALT00000060138 (TRIM7.2)
Jejunum	ENSGALT00000075892 (KIFC1)	ENSGALT00000060138 (TRIM7.2)
Jejunum	ENSGALT00000074567 (ZNF692)	ENSGALT00000060138 (TRIM7.2)
Jejunum	ENSGALT00000066783 (BF1)	ENSGALT00000047881 (TAP1)
Jejunum	ENSGALT00000098363 (ENSGALG00000050552)	ENSGALT00000061328 (TMEM141)
Jejunum	ENSGALT00000014314 (RPL12)	ENSGALT00000014334 (LRSAM1)
Jejunum	ENSGALT00000089974 (NTMT1)	ENSGALT00000108244 (ASB6)
Jejunum	ENSGALT00000072855 (USP20)	ENSGALT00000006601 (C9orf78)
Jejunum	ENSGALT00000005964 (POMT1)	ENSGALT00000005921 (UCK1)
Jejunum	ENSGALT00000087416 (RPL7A)	ENSGALT00000005076 (MED22)
Jejunum	ENSGALT00000005036 (ENSGALG00000003175)	ENSGALT00000071842 (REXO4)
Jejunum	ENSGALT00000094763 (GSN)	ENSGALT00000034894 (STOM)
Jejunum	ENSGALT00000002038 (MRRFP1)	ENSGALT00000044500 (RBM18)
Jejunum	ENSGALT00000001858 (RABGAP1)	ENSGALT00000063306 (ZBTB26)
Jejunum	ENSGALT00000057653 (RABEPK)	ENSGALT00000001495 (PPP6C)
Jejunum	ENSGALT00000092370 (RALGPS1)	ENSGALT00000001362 (ANGPTL2)
Jejunum	ENSGALT00000049922 (RALGPS1)	ENSGALT00000001362 (ANGPTL2)
Jejunum	ENSGALT00000084390 (ENSGALG00000024335)	ENSGALT00000041141 (ENSGALG00000050425)
Jejunum	ENSGALT00000081425 (ADPRM)	ENSGALT00000048912 (SCO1)
Jejunum	ENSGALT00000002182 (B3GNTL1)	ENSGALT00000064276 (TBCD)
Jejunum	ENSGALT00000093480 (OGFOD3)	ENSGALT00000039218 (UTS2R)
Jejunum	ENSGALT00000073781 (SRSF2)	ENSGALT00000002759 (METTL23)
Jejunum	ENSGALT00000003814 (RECQL5)	ENSGALT00000003817 (SMIM5)
Jejunum	ENSGALT00000004493 (DCXR)	ENSGALT00000053553 (RAC3)
Jejunum	ENSGALT00000095937 (ENSGALG00000046212)	ENSGALT00000005570 (POLG2)
Jejunum	ENSGALT00000006665 (ARSG)	ENSGALT00000006617 (SLC16A6)
Jejunum	ENSGALT00000053808 (COG1)	ENSGALT00000073416 (FAM104A)
Jejunum	ENSGALT00000102346 (ENSGALG00000049911)	ENSGALT00000011710 (ALYREF)
Jejunum	ENSGALT00000031388 (ENSGALG00000019761)	ENSGALT00000038263 (ACSF2)
Jejunum	ENSGALT00000012890 (KCTD2)	ENSGALT00000084498 (ATP5PD)
Jejunum	ENSGALT00000080909 (MRPS7)	ENSGALT00000044481 (MIF4GD)
Jejunum	ENSGALT00000085665 (MRPS7)	ENSGALT00000044481 (MIF4GD)
Jejunum	ENSGALT00000083321 (ENSGALG00000052672)	ENSGALT00000073675 (ENSGALG00000033320)
Jejunum	ENSGALT00000053956 (ENSGALG00000037051)	ENSGALT00000073675 (ENSGALG00000033320)
Jejunum	ENSGALT00000049551 (ENSGALG00000037051)	ENSGALT00000073675 (ENSGALG00000033320)
Jejunum	ENSGALT00000048512 (ENSGALG00000037051)	ENSGALT00000073675 (ENSGALG00000033320)
Jejunum	ENSGALT00000102336 (ENSGALG00000001049)	ENSGALT00000107005 (MTMR4)
Jejunum	ENSGALT00000002870 (LRWD1)	ENSGALT00000053454 (POLR2J)
Jejunum	ENSGALT00000101743 (ENSGALG00000051520)	ENSGALT00000040248 (HSPB1)
Jejunum	ENSGALT00000088357 (TMEM120A)	ENSGALT00000003192 (POR)
Jejunum	ENSGALT00000003859 (CCT6A)	ENSGALT00000065653 (PSPH)
Jejunum	ENSGALT00000003887 (ENSGALG00000002463)	ENSGALT00000003916 (PHKG1)
Jejunum	ENSGALT00000004993 (SRR)	ENSGALT00000058580 (SMG6)
Jejunum	ENSGALT00000007038 (TTC19)	ENSGALT00000039555 (ZSWIM7)
Jejunum	ENSGALT00000008627 (ZNHIT3)	ENSGALT00000090994 (MYO19)
Jejunum	ENSGALT00000050118 (EVI2A)	ENSGALT00000055292 (NF1)
Jejunum	ENSGALT00000068634 (ENSGALG00000035589)	ENSGALT00000055292 (NF1)
Jejunum	ENSGALT00000008974 (OMG)	ENSGALT00000055292 (NF1)
Jejunum	ENSGALT00000009146 (TMEM97)	ENSGALT00000086153 (IFT20)
Jejunum	ENSGALT00000008701 (JMJD4)	ENSGALT00000103352 (SNAP47)
Jejunum	ENSGALT00000107452 (ENSGALG00000050097)	ENSGALT00000010035 (PRKAG2)
Jejunum	ENSGALT00000077652 (ENSGALG00000048869)	ENSGALT00000103198 (ENSGALG00000053860)
Jejunum	ENSGALT00000065275 (CBX3)	ENSGALT00000089553 (HNRNPA2B1)
Jejunum	ENSGALT00000081699 (METTL6)	ENSGALT00000065313 (EAF1)
Jejunum	ENSGALT00000057417 (METTL6)	ENSGALT00000065313 (EAF1)
Jejunum	ENSGALT00000098055 (ACKR4)	ENSGALT00000054111 (ACAD11)
Jejunum	ENSGALT00000041883 (7SK)	ENSGALT00000061461 (TPK1)
Jejunum	ENSGALT00000045583 (ENSGALG00000054420)	ENSGALT00000077586 (BPHL)
Jejunum	ENSGALT00000098666 (PIGN)	ENSGALT00000021033 (RELCH)
Jejunum	ENSGALT00000075665 (ATPSCKMT)	ENSGALT00000021286 (CCT5)
Jejunum	ENSGALT00000046536 (FASTKD3)	ENSGALT00000079280 (MTRR)
Jejunum	ENSGALT00000092899 (CCDC127)	ENSGALT00000021508 (SDHA)
Jejunum	ENSGALT00000107024 (ENSGALG00000031167)	ENSGALT00000076291 (COPS5)
Jejunum	ENSGALT00000069458 (E2F5)	ENSGALT00000095935 (RBIS)
Jejunum	ENSGALT00000059601 (PTDSS1)	ENSGALT00000082823 (MTERF3)
Jejunum	ENSGALT00000065707 (DCAF13)	ENSGALT00000048847 (SLC25A32)
Jejunum	ENSGALT00000048868 (NDUFB9)	ENSGALT00000053515 (TATDN1)
Jejunum	ENSGALT00000002384 (NFS1)	ENSGALT00000085125 (ROMO1)
Jejunum	ENSGALT00000006537 (ENSGALG00000004110)	ENSGALT00000006521 (STK4)
Jejunum	ENSGALT00000011080 (ZSWIM3)	ENSGALT00000011074 (ACOT8)
Jejunum	ENSGALT00000073180 (CTSZ)	ENSGALT00000095073 (GNAS)
Jejunum	ENSGALT00000103806 (ENSGALG00000053815)	ENSGALT00000012356 (PCK1)
Jejunum	ENSGALT00000076040 (GCNT7)	ENSGALT00000012492 (RTFDC1)
Jejunum	ENSGALT00000091515 (ENSGALG00000052083)	ENSGALT00000101786 (PTPN1)
Jejunum	ENSGALT00000067446 (KLHL21)	ENSGALT00000076662 (PHF13)
Jejunum	ENSGALT00000001764 (PANK4)	ENSGALT00000001776 (KBP)
Jejunum	ENSGALT00000002586 (INTS11)	ENSGALT00000002613 (ENSGALG00000001701)
Jejunum	ENSGALT00000006360 (MRTO4)	ENSGALT00000006382 (AKR7L)
Jejunum	ENSGALT00000093096 (SVBP)	ENSGALT00000043695 (ENSGALG00000025800)
Jejunum	ENSGALT00000101019 (ENSGALG00000046740)	ENSGALT00000070374 (XPO7)
Jejunum	ENSGALT00000002549 (MAK16)	ENSGALT00000002520 (TTI2)
Jejunum	ENSGALT00000046784 (IKBKB)	ENSGALT00000087080 (ENSGALG00000041463)
Jejunum	ENSGALT00000097651 (ENSGALG00000049780)	ENSGALT00000054933 (CIAO1)
Jejunum	ENSGALT00000049116 (NCAPH)	ENSGALT00000107458 (ENSGALG00000050253)
Jejunum	ENSGALT00000106316 (ENSGALG00000046830)	ENSGALT00000054974 (ENSGALG00000031447)
Jejunum	ENSGALT00000049065 (ENSGALG00000037052)	ENSGALT00000106549 (ENSGALG00000046649)
Jejunum	ENSGALT00000005575 (RBBP4)	ENSGALT00000097257 (ZBTB8OS)
Jejunum	ENSGALT00000090942 (ENSGALG00000052196)	ENSGALT00000094228 (ENSGALG00000051101)
Jejunum	ENSGALT00000100565 (SLC25A44)	ENSGALT00000094228 (ENSGALG00000051101)
Jejunum	ENSGALT00000100295 (NNF1)	ENSGALT00000094228 (ENSGALG00000051101)
Jejunum	ENSGALT00000051767 (BGLAP)	ENSGALT00000094228 (ENSGALG00000051101)
Jejunum	ENSGALT00000086666 (ENSGALG00000045705)	ENSGALT00000074039 (HMBS)
Jejunum	ENSGALT00000082329 (HYLS1)	ENSGALT00000041115 (RPUSD4)
Jejunum	ENSGALT00000046807 (SRPRA)	ENSGALT00000050519 (EI24)
Jejunum	ENSGALT00000012488 (TRAPPC4)	ENSGALT00000012476 (ENSGALG00000007699)
Jejunum	ENSGALT00000103144 (PIH1D2)	ENSGALT00000012801 (ENSGALG00000007882)
Jejunum	ENSGALT00000087056 (NAXE)	ENSGALT00000102130 (GPATCH4)
Jejunum	ENSGALT00000106295 (LAMTOR2)	ENSGALT00000072558 (UBQLN4)
Jejunum	ENSGALT00000067623 (LAMTOR2)	ENSGALT00000072558 (UBQLN4)
Jejunum	ENSGALT00000052400 (ENSGALG00000037802)	ENSGALT00000097066 (ENSGALG00000050392)
Jejunum	ENSGALT00000050437 (ENSGALG00000037441)	ENSGALT00000091570 (ENSGALG00000046828)
Jejunum	ENSGALT00000045737 (SNAPIN)	ENSGALT00000086502 (ILF2)
Jejunum	ENSGALT00000076158 (NR1I3)	ENSGALT00000078411 (TOMM40L)
Jejunum	ENSGALT00000099192 (SYPL2)	ENSGALT00000074807 (PSMA5)
Jejunum	ENSGALT00000002207 (ATP5PB)	ENSGALT00000053742 (WDR77)
Jejunum	ENSGALT00000002368 (MOV10)	ENSGALT00000002385 (RHOC)
Jejunum	ENSGALT00000045280 (DCLRE1B)	ENSGALT00000057570 (AP4B1)
Jejunum	ENSGALT00000087884 (ENSGALG00000045738)	ENSGALT00000094502 (PCGF2)
Jejunum	ENSGALT00000062155 (ERBB2)	ENSGALT00000045413 (MIEN1)
Jejunum	ENSGALT00000044950 (NKIRAS2)	ENSGALT00000075442 (DNAJC7)
Jejunum	ENSGALT00000005068 (MLX)	ENSGALT00000046721 (PSMC3IP)
Jejunum	ENSGALT00000087871 (PSME3)	ENSGALT00000004706 (BECN1)
Jejunum	ENSGALT00000001057 (APBA3)	ENSGALT00000045101 (MRPL54)
Jejunum	ENSGALT00000102592 (MICOS13)	ENSGALT00000020974 (HSD11B1L)
Jejunum	ENSGALT00000102211 (CFD)	ENSGALT00000003081 (MED16)
Jejunum	ENSGALT00000080507 (RAB3A)	ENSGALT00000090385 (MPV17L2)
Jejunum	ENSGALT00000071359 (VRK2)	ENSGALT00000067764 (FANCL)
Jejunum	ENSGALT00000043204 (ASB3)	ENSGALT00000013322 (CHAC2)
Jejunum	ENSGALT00000014587 (EPCAM)	ENSGALT00000014542 (FBXO11)
Jejunum	ENSGALT00000057642 (CEP68)	ENSGALT00000083942 (RAB1B)
Jejunum	ENSGALT00000033264 (SNX5)	ENSGALT00000076330 (MGME1)
Jejunum	ENSGALT00000022442 (GALM)	ENSGALT00000077309 (ENSGALG00000038528)
Jejunum	ENSGALT00000052584 (GALM)	ENSGALT00000077309 (ENSGALG00000038528)
Jejunum	ENSGALT00000056217 (GALM)	ENSGALT00000077309 (ENSGALG00000038528)
Jejunum	ENSGALT00000076325 (ESRRG)	ENSGALT00000093928 (ENSGALG00000041996)
Jejunum	ENSGALT00000038479 (NSL1)	ENSGALT00000031933 (TATDN3)
Jejunum	ENSGALT00000016003 (INTS7)	ENSGALT00000015990 (DTL)
Jejunum	ENSGALT00000016247 (PRKCE)	ENSGALT00000105633 (ENSGALG00000047946)
Jejunum	ENSGALT00000016260 (RHOQ)	ENSGALT00000054390 (PIGF)
Jejunum	ENSGALT00000016264 (CRIPT)	ENSGALT00000054390 (PIGF)
Jejunum	ENSGALT00000107158 (RBKS)	ENSGALT00000016306 (BRE)
Jejunum	ENSGALT00000087776 (RBKS)	ENSGALT00000107891 (MRPL33)
Jejunum	ENSGALT00000016762 (ENSGALG00000010303)	ENSGALT00000106840 (MAD2L1BP)
Jejunum	ENSGALT00000017183 (EIF2AK2)	ENSGALT00000064824 (GPATCH11)
Jejunum	ENSGALT00000097478 (CEBPZOS)	ENSGALT00000066488 (CEBPZ)
Jejunum	ENSGALT00000101864 (ENSGALG00000054084)	ENSGALT00000017370 (DESI2)
Jejunum	ENSGALT00000022610 (B3GALNT2)	ENSGALT00000022606 (ENSGALG00000013950)
Jejunum	ENSGALT00000052694 (PHF10)	ENSGALT00000018251 (C3H6orf120)
Jejunum	ENSGALT00000019010 (TCP1)	ENSGALT00000019060 (ACAT2)
Jejunum	ENSGALT00000084731 (TCP1)	ENSGALT00000019060 (ACAT2)
Jejunum	ENSGALT00000097909 (TMEM181)	ENSGALT00000099419 (DYNLT1)
Jejunum	ENSGALT00000067131 (ENSGALG00000038188)	ENSGALT00000097646 (AKAP7)
Jejunum	ENSGALT00000024014 (MCM9)	ENSGALT00000073491 (ASF1A)
Jejunum	ENSGALT00000098629 (ZUP1)	ENSGALT00000024093 (KPNA5)
Jejunum	ENSGALT00000024100 (ZUP1)	ENSGALT00000024093 (KPNA5)
Jejunum	ENSGALT00000045345 (BORCS6)	ENSGALT00000025447 (PNRC1)
Jejunum	ENSGALT00000025553 (ME1)	ENSGALT00000025556 (RWDD2A)
Jejunum	ENSGALT00000101074 (ENSGALG00000053695)	ENSGALT00000060276 (KCNQ5)
Jejunum	ENSGALT00000096920 (ANGPT2)	ENSGALT00000086126 (MCPH1)
Jejunum	ENSGALT00000026434 (TRAPPC12)	ENSGALT00000026430 (TSSC1)
Jejunum	ENSGALT00000107871 (ENSGALG00000049474)	ENSGALT00000026473 (MBOAT2)
Jejunum	ENSGALT00000093705 (ATP6V1C2)	ENSGALT00000026538 (PDIA6)
Jejunum	ENSGALT00000070715 (ATP6V1C2)	ENSGALT00000026538 (PDIA6)
Jejunum	ENSGALT00000026572 (GEN1)	ENSGALT00000026569 (SMC6)
Jejunum	ENSGALT00000026714 (HADHB)	ENSGALT00000026684 (HADHA)
Jejunum	ENSGALT00000077870 (RUNX2)	ENSGALT00000026959 (SUPT3H)
Jejunum	ENSGALT00000060697 (IMP3)	ENSGALT00000026970 (PLA2G7)
Jejunum	ENSGALT00000073056 (FARSA)	ENSGALT00000067189 (CALR)
Jejunum	ENSGALT00000073335 (ATP13A1)	ENSGALT00000060969 (MVB12A)
Jejunum	ENSGALT00000083234 (ENSGALG00000044436)	ENSGALT00000088455 (ENSGALG00000044817)
Jejunum	ENSGALT00000082857 (THAP7)	ENSGALT00000064260 (ENSGALG00000034772)
Jejunum	ENSGALT00000104888 (SAE1)	ENSGALT00000100677 (ENSGALG00000049505)
Jejunum	ENSGALT00000104343 (SAE1)	ENSGALT00000100677 (ENSGALG00000049505)
Jejunum	ENSGALT00000052009 (CSAD)	ENSGALT00000086793 (ZNF740)
Jejunum	ENSGALT00000006376 (AIFM1)	ENSGALT00000006401 (MARS2)
Jejunum	ENSGALT00000074919 (ZDHHC9)	ENSGALT00000040562 (ENSGALG00000024039)
Jejunum	ENSGALT00000007959 (TIMM8A)	ENSGALT00000007977 (ENSGALG00000004975)
Jejunum	ENSGALT00000092964 (ENSGALG00000048179)	ENSGALT00000013477 (ATG4A)
Jejunum	ENSGALT00000014910 (IDS)	ENSGALT00000088976 (ENSGALG00000029286)
Jejunum	ENSGALT00000049625 (TDO2)	ENSGALT00000015270 (CTSO)
Jejunum	ENSGALT00000015353 (RXFP1)	ENSGALT00000096658 (C4orf46)
Jejunum	ENSGALT00000015372 (ETFDH)	ENSGALT00000015382 (PPID)
Jejunum	ENSGALT00000078753 (KLHL2)	ENSGALT00000028637 (7SK)
Jejunum	ENSGALT00000067980 (KLHL2)	ENSGALT00000028637 (7SK)
Jejunum	ENSGALT00000104517 (ENSGALG00000048950)	ENSGALT00000016223 (ZNF827)
Jejunum	ENSGALT00000087558 (MAB21L2)	ENSGALT00000056918 (LRBA)
Jejunum	ENSGALT00000107607 (SCLT1)	ENSGALT00000016460 (CDKL2)
Jejunum	ENSGALT00000101264 (SCLT1)	ENSGALT00000016460 (CDKL2)
Jejunum	ENSGALT00000098797 (SCLT1)	ENSGALT00000016460 (CDKL2)
Jejunum	ENSGALT00000016584 (ABHD18)	ENSGALT00000016578 (MFSD8)
Jejunum	ENSGALT00000067326 (GTF2E2)	ENSGALT00000093271 (SMIM18)
Jejunum	ENSGALT00000016727 (GTF2E2)	ENSGALT00000093271 (SMIM18)
Jejunum	ENSGALT00000068504 (ENSGALG00000042001)	ENSGALT00000051420 (PYURF)
Jejunum	ENSGALT00000032215 (CENPU)	ENSGALT00000038264 (PRIMPOL)
Jejunum	ENSGALT00000100963 (CASP3)	ENSGALT00000038264 (PRIMPOL)
Jejunum	ENSGALT00000095180 (RWDD4)	ENSGALT00000017333 (TRAPPC11)
Jejunum	ENSGALT00000092045 (TMEM150C)	ENSGALT00000086779 (ENOPH1)
Jejunum	ENSGALT00000038016 (HNRNPDL)	ENSGALT00000086779 (ENOPH1)
Jejunum	ENSGALT00000047514 (HNRNPDL)	ENSGALT00000086779 (ENOPH1)
Jejunum	ENSGALT00000068418 (HNRNPDL)	ENSGALT00000086779 (ENOPH1)
Jejunum	ENSGALT00000038003 (MRPS18C)	ENSGALT00000018281 (FAM175A)
Jejunum	ENSGALT00000101063 (IGFBP7)	ENSGALT00000037965 (POLR2B)
Jejunum	ENSGALT00000099383 (NUDT6)	ENSGALT00000085206 (SPATA5)
Jejunum	ENSGALT00000023118 (RFC1)	ENSGALT00000022768 (ENSGALG00000049347)
Jejunum	ENSGALT00000056296 (FAM184B)	ENSGALT00000091312 (MED28)
Jejunum	ENSGALT00000025058 (TBC1D14)	ENSGALT00000098678 (ENSGALG00000051262)
Jejunum	ENSGALT00000100752 (ENSGALG00000052156)	ENSGALT00000078117 (ENSGALG00000041205)
Jejunum	ENSGALT00000069369 (DCTN1)	ENSGALT00000052568 (IDH3B)
Jejunum	ENSGALT00000082932 (NOP56)	ENSGALT00000052568 (IDH3B)
Jejunum	ENSGALT00000079016 (RAD9A)	ENSGALT00000051728 (PPP1CA)
Jejunum	ENSGALT00000086995 (TMEM138)	ENSGALT00000069064 (CYB561A3)
Jejunum	ENSGALT00000050879 (SDHAF2)	ENSGALT00000071357 (CPSF7)
Jejunum	ENSGALT00000077591 (ENSGALG00000034939)	ENSGALT00000069733 (AIP)
Jejunum	ENSGALT00000071261 (PDDC1)	ENSGALT00000086673 (NLRP3)
Jejunum	ENSGALT00000049686 (C15orf62)	ENSGALT00000061124 (DNAJC17)
Jejunum	ENSGALT00000019813 (ELP4)	ENSGALT00000031814 (IMMP1L)
Jejunum	ENSGALT00000065948 (ENSGALG00000030338)	ENSGALT00000091563 (CTNND1)
Jejunum	ENSGALT00000013143 (CELF1)	ENSGALT00000013133 (PTPMT1)
Jejunum	ENSGALT00000013368 (ACP2)	ENSGALT00000013377 (DDB2)
Jejunum	ENSGALT00000045646 (CHAC1)	ENSGALT00000107557 (INO80)
Jejunum	ENSGALT00000013997 (RTF1)	ENSGALT00000013981 (NDUFAF1)
Jejunum	ENSGALT00000097876 (ENSGALG00000052965)	ENSGALT00000079778 (C5H15orf41)
Jejunum	ENSGALT00000016576 (COQ6)	ENSGALT00000016585 (ENTPD5)
Jejunum	ENSGALT00000037710 (TTLL5)	ENSGALT00000081527 (ENSGALG00000034354)
Jejunum	ENSGALT00000089352 (TTLL5)	ENSGALT00000081527 (ENSGALG00000034354)
Jejunum	ENSGALT00000092288 (GSTZ1)	ENSGALT00000073797 (POMT2)
Jejunum	ENSGALT00000055042 (SLIRP)	ENSGALT00000017099 (SNW1)
Jejunum	ENSGALT00000102633 (ADCK1)	ENSGALT00000017099 (SNW1)
Jejunum	ENSGALT00000017538 (CPSF2)	ENSGALT00000037601 (NDUFB1)
Jejunum	ENSGALT00000101237 (GSKIP)	ENSGALT00000066952 (ATG2B)
Jejunum	ENSGALT00000057576 (BTBD6)	ENSGALT00000019132 (BRF1)
Jejunum	ENSGALT00000079178 (EXOC5)	ENSGALT00000019765 (AP5M1)
Jejunum	ENSGALT00000074859 (ATP5S)	ENSGALT00000020088 (CDKL1)
Jejunum	ENSGALT00000020162 (ATL1)	ENSGALT00000020164 (SAV1)
Jejunum	ENSGALT00000032445 (ENSGALG00000020342)	ENSGALT00000020196 (PYGL)
Jejunum	ENSGALT00000078099 (ENSGALG00000040737)	ENSGALT00000071346 (ENSGALG00000043130)
Jejunum	ENSGALT00000052751 (ENSGALG00000040055)	ENSGALT00000071346 (ENSGALG00000043130)
Jejunum	ENSGALT00000103622 (ENSGALG00000040737)	ENSGALT00000071346 (ENSGALG00000043130)
Jejunum	ENSGALT00000084769 (ENSGALG00000031497)	ENSGALT00000071346 (ENSGALG00000043130)
Jejunum	ENSGALT00000003306 (PARG)	ENSGALT00000003257 (ENSGALG00000002089)
Jejunum	ENSGALT00000004372 (DNAJC12)	ENSGALT00000004359 (SIRT1)
Jejunum	ENSGALT00000058801 (P4HA1)	ENSGALT00000006875 (NUDT13)
Jejunum	ENSGALT00000006896 (P4HA1)	ENSGALT00000006875 (NUDT13)
Jejunum	ENSGALT00000089611 (ASCC1)	ENSGALT00000007029 (ANAPC16)
Jejunum	ENSGALT00000049666 (ASCC1)	ENSGALT00000007029 (ANAPC16)
Jejunum	ENSGALT00000007929 (POLR3A)	ENSGALT00000072914 (RPS24)
Jejunum	ENSGALT00000012071 (COX15)	ENSGALT00000046257 (CUTC)
Jejunum	ENSGALT00000051958 (RRP12)	ENSGALT00000039466 (PGAM1)
Jejunum	ENSGALT00000013413 (TAF5)	ENSGALT00000051809 (USMG5)
Jejunum	ENSGALT00000107684 (PDCD4)	ENSGALT00000057879 (BBIP1)
Jejunum	ENSGALT00000055818 (PDCD4)	ENSGALT00000057879 (BBIP1)
Jejunum	ENSGALT00000108109 (DOCK1)	ENSGALT00000074191 (INSYN2A)
Jejunum	ENSGALT00000013388 (NIF3L1)	ENSGALT00000013390 (PPIL3)
Jejunum	ENSGALT00000014220 (ENSGALG00000008738)	ENSGALT00000080101 (CYP20A1)
Jejunum	ENSGALT00000015749 (METTL5)	ENSGALT00000015751 (SSB)
Jejunum	ENSGALT00000072293 (PTPRN)	ENSGALT00000018446 (DES)
Jejunum	ENSGALT00000018510 (CNPPD1)	ENSGALT00000077523 (ZFAND2B)
Jejunum	ENSGALT00000087444 (AAMP)	ENSGALT00000018675 (ARPC2)
Jejunum	ENSGALT00000083500 (PARP9)	ENSGALT00000096667 (FAIM)
Jejunum	ENSGALT00000090492 (PARP9)	ENSGALT00000096667 (FAIM)
Jejunum	ENSGALT00000037868 (GPR39)	ENSGALT00000095849 (LYPD1)
Jejunum	ENSGALT00000020527 (TANC1)	ENSGALT00000020533 (WDSUB1)
Jejunum	ENSGALT00000003258 (GPSM2)	ENSGALT00000003286 (CLCC1)
Jejunum	ENSGALT00000105920 (ENSGALG00000054302)	ENSGALT00000082034 (NR5A2)
Jejunum	ENSGALT00000091029 (ENSGALG00000054260)	ENSGALT00000082034 (NR5A2)
Jejunum	ENSGALT00000098224 (B3GALT2)	ENSGALT00000003897 (CDC73)
Jejunum	ENSGALT00000099000 (ENSGALG00000050838)	ENSGALT00000004826 (PRDX6)
Jejunum	ENSGALT00000073277 (SCYL3)	ENSGALT00000072136 (C1orf112)
Jejunum	ENSGALT00000056245 (METTL18)	ENSGALT00000072136 (C1orf112)
Jejunum	ENSGALT00000006824 (ANGPTL1)	ENSGALT00000006794 (RALGPS2)
Jejunum	ENSGALT00000052097 (MRPS14)	ENSGALT00000007248 (CACYBP)
Jejunum	ENSGALT00000053904 (TPR)	ENSGALT00000008146 (C8H1orf27)
Jejunum	ENSGALT00000008185 (TPR)	ENSGALT00000008146 (C8H1orf27)
Jejunum	ENSGALT00000096814 (ENSGALG00000054466)	ENSGALT00000057656 (ADGRL2)
Jejunum	ENSGALT00000033166 (ARMH1)	ENSGALT00000097075 (KIF2C)
Jejunum	ENSGALT00000038158 (MRPL37)	ENSGALT00000017496 (ENSGALG00000010758)
Jejunum	ENSGALT00000086450 (ANGPTL3)	ENSGALT00000095917 (DOCK7)
Jejunum	ENSGALT00000017909 (EFCAB7)	ENSGALT00000044324 (ITGB3BP)
Jejunum	ENSGALT00000040843 (MOGAT1)	ENSGALT00000008412 (FARSB)
Jejunum	ENSGALT00000072981 (PSMD1)	ENSGALT00000012451 (HTR2B)
Jejunum	ENSGALT00000061761 (MCF2L2)	ENSGALT00000058942 (B3GNT5)
Jejunum	ENSGALT00000015715 (LXN)	ENSGALT00000015688 (GFM1)
Jejunum	ENSGALT00000062124 (P2RY13)	ENSGALT00000016895 (MED12L)
Jejunum	ENSGALT00000080536 (GPR171)	ENSGALT00000016895 (MED12L)
Jejunum	ENSGALT00000104594 (CP)	ENSGALT00000082756 (HPS3)
Jejunum	ENSGALT00000099830 (CP)	ENSGALT00000082756 (HPS3)
Jejunum	ENSGALT00000049432 (ENSGALG00000030075)	ENSGALT00000062132 (ENSGALG00000043610)
Jejunum	ENSGALT00000100007 (MED11)	ENSGALT00000098531 (ENSGALG00000049559)
Jejunum	ENSGALT00000092795 (COLGALT1)	ENSGALT00000107074 (PRKCSH)
Jejunum	ENSGALT00000004064 (ENSGALG00000002578)	ENSGALT00000034416 (CA9)
Jejunum	ENSGALT00000004088 (ARHGEF39)	ENSGALT00000066276 (ENSGALG00000037611)
[truncated: 3,222 more rows]

## Sheet: Mono-Expressed Genomic-Coordina
Supplemental Table 4: Mono-expressed Genomic-Coordinate Transcript Pairs
Cell Type	Transcript 1	Transcript 2
B Cell	ENSGALT00000013282 (GDI1)	ENSGALT00000096902 (TASOR2)
B Cell	ENSGALT00000013186 (RINT1)	ENSGALT00000104579 (EFCAB10)
B Cell	ENSGALT00000011632 (ERGIC2)	ENSGALT00000104032 (LAMB1)
B Cell	ENSGALT00000018475 (SNAPC3)	ENSGALT00000054741 (TMCC3)
B Cell	ENSGALT00000094657 (ENSGALG00000053936)	ENSGALT00000092609 (BID)
B Cell	ENSGALT00000106922 (CCDC91)	ENSGALT00000094854 (ENSGALG00000051865)
B Cell	ENSGALT00000030337 (GATD3A)	ENSGALT00000101667 (ENSGALG00000052076)
B Cell	ENSGALT00000027298 (UGGT2)	ENSGALT00000089693 (DNAJC3)
B Cell	ENSGALT00000036465 (SUPT20H)	ENSGALT00000027544 (EXOSC8)
B Cell	ENSGALT00000099856 (MTMR10)	ENSGALT00000088600 (FAN1)
B Cell	ENSGALT00000075864 (ITFG1)	ENSGALT00000077458 (PHKB)
B Cell	ENSGALT00000077917 (CEBPG)	ENSGALT00000007832 (PEPD)
B Cell	ENSGALT00000051074 (CEBPG)	ENSGALT00000007832 (PEPD)
B Cell	ENSGALT00000008632 (WWOX)	ENSGALT00000104098 (ENSGALG00000050479)
B Cell	ENSGALT00000044355 (DEF8)	ENSGALT00000076178 (DBNDD1)
B Cell	ENSGALT00000000910 (UTP4)	ENSGALT00000000898 (CHTF8)
B Cell	ENSGALT00000090346 (TMEM231)	ENSGALT00000005083 (GABARAPL2)
B Cell	ENSGALT00000008865 (APPL1)	ENSGALT00000008837 (HESX1)
B Cell	ENSGALT00000089325 (THOC3)	ENSGALT00000061660 (SIMC1)
B Cell	ENSGALT00000006272 (GEMIN5)	ENSGALT00000006244 (MRPL22)
B Cell	ENSGALT00000060524 (GPR146)	ENSGALT00000105461 (C7orf50)
B Cell	ENSGALT00000006456 (GPR146)	ENSGALT00000105461 (C7orf50)
B Cell	ENSGALT00000092653 (GPR146)	ENSGALT00000105461 (C7orf50)
B Cell	ENSGALT00000071421 (GPR146)	ENSGALT00000105461 (C7orf50)
B Cell	ENSGALT00000102216 (ENSGALG00000050332)	ENSGALT00000105461 (C7orf50)
B Cell	ENSGALT00000006465 (GPER1)	ENSGALT00000105461 (C7orf50)
B Cell	ENSGALT00000029798 (ENSGALG00000002042)	ENSGALT00000045802 (IQCK)
B Cell	ENSGALT00000098425 (COMT)	ENSGALT00000106227 (TXNRD2)
B Cell	ENSGALT00000060434 (TCTN1)	ENSGALT00000106081 (HVCN1)
B Cell	ENSGALT00000098363 (ENSGALG00000050552)	ENSGALT00000092687 (TMEM141)
B Cell	ENSGALT00000014314 (RPL12)	ENSGALT00000076180 (LRSAM1)
B Cell	ENSGALT00000067722 (RPL12)	ENSGALT00000076180 (LRSAM1)
B Cell	ENSGALT00000039770 (SPTAN1)	ENSGALT00000075115 (WDR34)
B Cell	ENSGALT00000005036 (ENSGALG00000003175)	ENSGALT00000091916 (REXO4)
B Cell	ENSGALT00000001402 (MVB12B)	ENSGALT00000042544 (NRON)
B Cell	ENSGALT00000004723 (UTP18)	ENSGALT00000055662 (MBTD1)
B Cell	ENSGALT00000019296 (CANT1)	ENSGALT00000101732 (ENGASE)
B Cell	ENSGALT00000012930 (ARMC7)	ENSGALT00000066580 (HN1)
B Cell	ENSGALT00000083321 (ENSGALG00000052672)	ENSGALT00000083394 (ENSGALG00000033320)
B Cell	ENSGALT00000052025 (DDX25)	ENSGALT00000083394 (ENSGALG00000033320)
B Cell	ENSGALT00000053956 (ENSGALG00000037051)	ENSGALT00000083394 (ENSGALG00000033320)
B Cell	ENSGALT00000049551 (ENSGALG00000037051)	ENSGALT00000083394 (ENSGALG00000033320)
B Cell	ENSGALT00000088357 (TMEM120A)	ENSGALT00000003192 (POR)
B Cell	ENSGALT00000003859 (CCT6A)	ENSGALT00000065653 (PSPH)
B Cell	ENSGALT00000050118 (EVI2A)	ENSGALT00000050895 (NF1)
B Cell	ENSGALT00000068634 (ENSGALG00000035589)	ENSGALT00000050895 (NF1)
B Cell	ENSGALT00000008974 (OMG)	ENSGALT00000050895 (NF1)
B Cell	ENSGALT00000073448 (FBXO39)	ENSGALT00000100126 (TEKT1)
B Cell	ENSGALT00000077652 (ENSGALG00000048869)	ENSGALT00000107989 (ENSGALG00000053860)
B Cell	ENSGALT00000065275 (CBX3)	ENSGALT00000017975 (HNRNPA2B1)
B Cell	ENSGALT00000070014 (CX3CR1)	ENSGALT00000097414 (ENSGALG00000053738)
B Cell	ENSGALT00000094838 (ENSGALG00000049242)	ENSGALT00000093368 (ENSGALG00000046360)
B Cell	ENSGALT00000059601 (PTDSS1)	ENSGALT00000088465 (MTERF3)
B Cell	ENSGALT00000098075 (ENSGALG00000053276)	ENSGALT00000092458 (ENSGALG00000049289)
B Cell	ENSGALT00000075646 (ENSGALG00000004110)	ENSGALT00000072864 (STK4)
B Cell	ENSGALT00000006537 (ENSGALG00000004110)	ENSGALT00000072864 (STK4)
B Cell	ENSGALT00000085389 (SIRPA)	ENSGALT00000097226 (gga-mir-12243)
B Cell	ENSGALT00000087131 (MAD2L2)	ENSGALT00000007401 (ENSGALG00000004646)
B Cell	ENSGALT00000046784 (IKBKB)	ENSGALT00000085685 (ENSGALG00000041463)
B Cell	ENSGALT00000064031 (ADD2)	ENSGALT00000098443 (HK2)
B Cell	ENSGALT00000022512 (SNRNP27)	ENSGALT00000098443 (HK2)
B Cell	ENSGALT00000022511 (MXD1)	ENSGALT00000098443 (HK2)
B Cell	ENSGALT00000003067 (GNL2)	ENSGALT00000105547 (ENSGALG00000049411)
B Cell	ENSGALT00000086666 (ENSGALG00000045705)	ENSGALT00000090319 (HMBS)
B Cell	ENSGALT00000082329 (HYLS1)	ENSGALT00000088029 (RPUSD4)
B Cell	ENSGALT00000046476 (TIRAP)	ENSGALT00000061538 (FAM118B)
B Cell	ENSGALT00000045737 (SNAPIN)	ENSGALT00000055413 (ILF2)
B Cell	ENSGALT00000002093 (TRAF3IP3)	ENSGALT00000002179 (GUCA1A)
B Cell	ENSGALT00000045280 (DCLRE1B)	ENSGALT00000071936 (ENSGALG00000053784)
B Cell	ENSGALT00000087871 (PSME3)	ENSGALT00000083880 (BECN1)
B Cell	ENSGALT00000010139 (GINS1)	ENSGALT00000098568 (ENSGALG00000023506)
B Cell	ENSGALT00000015469 (RAB3GAP2)	ENSGALT00000096327 (IARS2)
B Cell	ENSGALT00000087173 (BPNT1)	ENSGALT00000096327 (IARS2)
B Cell	ENSGALT00000016260 (RHOQ)	ENSGALT00000054390 (PIGF)
B Cell	ENSGALT00000016264 (CRIPT)	ENSGALT00000054390 (PIGF)
B Cell	ENSGALT00000076094 (AARS2)	ENSGALT00000068244 (RNF8)
B Cell	ENSGALT00000018217 (PSMB1)	ENSGALT00000084343 (TBP)
B Cell	ENSGALT00000106190 (RTN4IP1)	ENSGALT00000102103 (ENSGALG00000047141)
B Cell	ENSGALT00000071351 (TDRP)	ENSGALT00000026390 (FBXO25)
B Cell	ENSGALT00000107057 (ENSGALG00000047412)	ENSGALT00000092104 (ENSGALG00000049292)
B Cell	ENSGALT00000082408 (MARS)	ENSGALT00000100437 (ENSGALG00000031996)
B Cell	ENSGALT00000093668 (ENSGALG00000048578)	ENSGALT00000107380 (ENSGALG00000047994)
B Cell	ENSGALT00000016272 (TMEM184C)	ENSGALT00000092958 (PRMT9)
B Cell	ENSGALT00000087558 (MAB21L2)	ENSGALT00000016356 (LRBA)
B Cell	ENSGALT00000032215 (CENPU)	ENSGALT00000095844 (PRIMPOL)
B Cell	ENSGALT00000022312 (PPAT)	ENSGALT00000097634 (PAICS)
B Cell	ENSGALT00000067449 (ENSGALG00000040291)	ENSGALT00000098749 (ENSGALG00000054913)
B Cell	ENSGALT00000102215 (ENSGALG00000054613)	ENSGALT00000096940 (RAD51B)
B Cell	ENSGALT00000037710 (TTLL5)	ENSGALT00000086882 (ENSGALG00000034354)
B Cell	ENSGALT00000089352 (TTLL5)	ENSGALT00000086882 (ENSGALG00000034354)
B Cell	ENSGALT00000048369 (VASH1)	ENSGALT00000099151 (ANGEL1)
B Cell	ENSGALT00000102283 (ENSGALG00000053559)	ENSGALT00000099151 (ANGEL1)
B Cell	ENSGALT00000097709 (GPR65)	ENSGALT00000103812 (GALC)
B Cell	ENSGALT00000017244 (GPR65)	ENSGALT00000103812 (GALC)
B Cell	ENSGALT00000094423 (ENSGALG00000053496)	ENSGALT00000101434 (ENSGALG00000048897)
B Cell	ENSGALT00000020354 (ENSGALG00000012452)	ENSGALT00000103422 (FANCM)
B Cell	ENSGALT00000020371 (SOUL)	ENSGALT00000103422 (FANCM)
B Cell	ENSGALT00000070716 (FKBP3)	ENSGALT00000103422 (FANCM)
B Cell	ENSGALT00000068336 (JMJD1C)	ENSGALT00000043877 (ENSGALG00000027741)
B Cell	ENSGALT00000007929 (POLR3A)	ENSGALT00000007776 (RPS24)
B Cell	ENSGALT00000039919 (FAS)	ENSGALT00000103511 (ACTA2)
B Cell	ENSGALT00000094369 (ENSGALG00000038416)	ENSGALT00000093742 (ENSGALG00000049341)
B Cell	ENSGALT00000054299 (MAIP1)	ENSGALT00000106701 (TYW5)
B Cell	ENSGALT00000013388 (NIF3L1)	ENSGALT00000103811 (PPIL3)
B Cell	ENSGALT00000015749 (METTL5)	ENSGALT00000100882 (SSB)
B Cell	ENSGALT00000067019 (DNPEP)	ENSGALT00000018446 (DES)
B Cell	ENSGALT00000018510 (CNPPD1)	ENSGALT00000053169 (ENSGALG00000033452)
B Cell	ENSGALT00000020527 (TANC1)	ENSGALT00000085100 (WDSUB1)
B Cell	ENSGALT00000106565 (ENSGALG00000020986)	ENSGALT00000092529 (ENSGALG00000050793)
B Cell	ENSGALT00000004364 (ATP1B3)	ENSGALT00000105033 (TFDP2)
B Cell	ENSGALT00000102537 (ENSGALG00000047508)	ENSGALT00000084090 (ENSGALG00000053284)
B Cell	ENSGALT00000091603 (ENSGALG00000053380)	ENSGALT00000083596 (ENSGALG00000045164)
B Cell	ENSGALT00000092795 (COLGALT1)	ENSGALT00000095841 (PRKCSH)
B Cell	ENSGALT00000091299 (ENSGALG00000048432)	ENSGALT00000053584 (ENSGALG00000034488)
B Cell	ENSGALT00000052116 (ENSGALG00000034584)	ENSGALT00000106921 (ENSGALG00000053757)
B Cell	ENSGALT00000023719 (SKIV2L2)	ENSGALT00000057954 (PLPP1)
B Cell	ENSGALT00000071193 (SHLD3)	ENSGALT00000069401 (TRIM23)
B Cell	ENSGALT00000023818 (TRAPPC13)	ENSGALT00000069401 (TRIM23)
B Cell	ENSGALT00000089674 (TRAPPC13)	ENSGALT00000069401 (TRIM23)
B Cell	ENSGALT00000038562 (F2RL2)	ENSGALT00000024162 (IQGAP2)
B Cell	ENSGALT00000024127 (ENSGALG00000014960)	ENSGALT00000024125 (ANKDD1B)
B Cell	ENSGALT00000028137 (OSTF1)	ENSGALT00000103203 (NMRK1)
B Cell	ENSGALT00000023641 (TTC37)	ENSGALT00000063159 (ARSK)
B Cell	ENSGALT00000013281 (ANKRD16)	ENSGALT00000092270 (FBXO18)
B Cell	ENSGALT00000097519 (ENSGALG00000053060)	ENSGALT00000093654 (TASOR2)
B Cell	ENSGALT00000097398 (ENSGALG00000053060)	ENSGALT00000093654 (TASOR2)
B Cell	ENSGALT00000070713 (ENSGALG00000038546)	ENSGALT00000083648 (RSBN1L)
B Cell	ENSGALT00000102658 (ENSGALG00000048795)	ENSGALT00000058977 (H2A-VI)
B Cell	ENSGALT00000101955 (CACNA1C)	ENSGALT00000097702 (DCP1B)
B Cell	ENSGALT00000100404 (ENSGALG00000049912)	ENSGALT00000094338 (ENSGALG00000052801)
B Cell	ENSGALT00000098920 (ENSGALG00000049912)	ENSGALT00000094338 (ENSGALG00000052801)
B Cell	ENSGALT00000016632 (ENSGALG00000054335)	ENSGALT00000089470 (ENSGALG00000014754)
B Cell	ENSGALT00000082160 (NME7)	ENSGALT00000036926 (ATP1B1)
B Cell	ENSGALT00000036897 (HHLA2)	ENSGALT00000024781 (IFT57)
B Cell	ENSGALT00000098860 (ENSGALG00000054836)	ENSGALT00000024790 (KIAA1524)
B Cell	ENSGALT00000095806 (ENSGALG00000047821)	ENSGALT00000024926 (ZFP92)
B Cell	ENSGALT00000030243 (ENSGALG00000016760)	ENSGALT00000027060 (MITD1)
B Cell	ENSGALT00000107323 (RB1)	ENSGALT00000027460 (LPAR6)
B Cell	ENSGALT00000097789 (RB1)	ENSGALT00000027460 (LPAR6)
B Cell	ENSGALT00000104547 (ENSGALG00000053592)	ENSGALT00000027571 (PDS5B)
B Cell	ENSGALT00000096056 (ENSGALG00000053592)	ENSGALT00000027571 (PDS5B)
B Cell	ENSGALT00000092350 (MTIF3)	ENSGALT00000027621 (GTF3A)
B Cell	ENSGALT00000028519 (ENSGALG00000017812)	ENSGALT00000060059 (ENSGALG00000040433)
B Cell	ENSGALT00000028521 (ENSGALG00000017814)	ENSGALT00000060059 (ENSGALG00000040433)
B Cell	ENSGALT00000028522 (ENSGALG00000017815)	ENSGALT00000060059 (ENSGALG00000040433)
B Cell	ENSGALT00000082543 (ENSGALG00000033780)	ENSGALT00000058852 (ITGB1BP3)
B Cell	ENSGALT00000097973 (ENSGALG00000033780)	ENSGALT00000058852 (ITGB1BP3)
B Cell	ENSGALT00000105452 (ENSGALG00000007248)	ENSGALT00000011612 (SNRPA1)
B Cell	ENSGALT00000028047 (C11H16ORF87)	ENSGALT00000055464 (GPT2)
B Cell	ENSGALT00000091496 (UTP4)	ENSGALT00000058298 (CHTF8)
B Cell	ENSGALT00000088365 (UTP4)	ENSGALT00000058298 (CHTF8)
B Cell	ENSGALT00000086207 (UTP4)	ENSGALT00000058298 (CHTF8)
B Cell	ENSGALT00000096926 (RNF123)	ENSGALT00000105582 (AMIGO3)
B Cell	ENSGALT00000101522 (RNF123)	ENSGALT00000105582 (AMIGO3)
B Cell	ENSGALT00000045074 (OGN)	ENSGALT00000007467 (CENPP)
B Cell	ENSGALT00000047782 (TSEN2)	ENSGALT00000043832 (MKRN2OS)
B Cell	ENSGALT00000107244 (TSEN2)	ENSGALT00000043832 (MKRN2OS)
B Cell	ENSGALT00000106293 (PORCN)	ENSGALT00000105200 (CDK20)
B Cell	ENSGALT00000082236 (HNRNPH2)	ENSGALT00000009585 (DGUOK)
B Cell	ENSGALT00000071020 (ENSGALG00000034305)	ENSGALT00000107573 (ENSGALG00000047174)
B Cell	ENSGALT00000023235 (PHYKPL)	ENSGALT00000083027 (HNRNPAB)
B Cell	ENSGALT00000095347 (EPN2)	ENSGALT00000008174 (B9D1)
B Cell	ENSGALT00000105945 (GNPTG)	ENSGALT00000010385 (TSR3)
B Cell	ENSGALT00000106881 (LYRM1)	ENSGALT00000080718 (DCUN1D3)
B Cell	ENSGALT00000104055 (LYRM1)	ENSGALT00000080718 (DCUN1D3)
B Cell	ENSGALT00000100299 (ENSGALG00000046685)	ENSGALT00000098431 (ENSGALG00000050166)
B Cell	ENSGALT00000104374 (MRPL40)	ENSGALT00000077327 (HIRA)
B Cell	ENSGALT00000091250 (ENSGALG00000047380)	ENSGALT00000046723 (ENSGALG00000049208)
B Cell	ENSGALT00000093071 (ENSGALG00000047380)	ENSGALT00000046723 (ENSGALG00000049208)
B Cell	ENSGALT00000091475 (ENSGALG00000047380)	ENSGALT00000046723 (ENSGALG00000049208)
B Cell	ENSGALT00000092537 (ENSGALG00000050091)	ENSGALT00000046723 (ENSGALG00000049208)
B Cell	ENSGALT00000069999 (ENSGALG00000047794)	ENSGALT00000046723 (ENSGALG00000049208)
B Cell	ENSGALT00000086006 (ENSGALG00000050091)	ENSGALT00000054691 (ENSGALG00000047627)
B Cell	ENSGALT00000065054 (ENSGALG00000039480)	ENSGALT00000060138 (TRIM7.2)
B Cell	ENSGALT00000102344 (FLOT1)	ENSGALT00000076672 (TUBB)
B Cell	ENSGALT00000091355 (ENSGALG00000050552)	ENSGALT00000061328 (TMEM141)
B Cell	ENSGALT00000054954 (ENSGALG00000042325)	ENSGALT00000007637 (C17H9orf16)
B Cell	ENSGALT00000005964 (POMT1)	ENSGALT00000005921 (UCK1)
B Cell	ENSGALT00000094763 (GSN)	ENSGALT00000034894 (STOM)
B Cell	ENSGALT00000043949 (ENSGALG00000028552)	ENSGALT00000092934 (DENND1A)
B Cell	ENSGALT00000106859 (SCAI)	ENSGALT00000057772 (RPL35)
B Cell	ENSGALT00000001535 (SCAI)	ENSGALT00000057772 (RPL35)
B Cell	ENSGALT00000092995 (SCAI)	ENSGALT00000057772 (RPL35)
B Cell	ENSGALT00000103143 (SCAI)	ENSGALT00000057772 (RPL35)
B Cell	ENSGALT00000051891 (RALGPS1)	ENSGALT00000001362 (ANGPTL2)
B Cell	ENSGALT00000001330 (RALGPS1)	ENSGALT00000001362 (ANGPTL2)
B Cell	ENSGALT00000091153 (B3GNTL1)	ENSGALT00000064276 (TBCD)
B Cell	ENSGALT00000092441 (B3GNTL1)	ENSGALT00000064276 (TBCD)
B Cell	ENSGALT00000100406 (B3GNTL1)	ENSGALT00000064276 (TBCD)
B Cell	ENSGALT00000105612 (CENPX)	ENSGALT00000004537 (LRRC45)
B Cell	ENSGALT00000101403 (ENSGALG00000046212)	ENSGALT00000005570 (POLG2)
B Cell	ENSGALT00000076465 (COG1)	ENSGALT00000073416 (FAM104A)
B Cell	ENSGALT00000071031 (DDX25)	ENSGALT00000073675 (ENSGALG00000033320)
B Cell	ENSGALT00000080376 (ENSGALG00000037051)	ENSGALT00000073675 (ENSGALG00000033320)
B Cell	ENSGALT00000073554 (ENSGALG00000037051)	ENSGALT00000073675 (ENSGALG00000033320)
B Cell	ENSGALT00000048512 (ENSGALG00000037051)	ENSGALT00000073675 (ENSGALG00000033320)
B Cell	ENSGALT00000103112 (ENSGALG00000047563)	ENSGALT00000073675 (ENSGALG00000033320)
B Cell	ENSGALT00000097527 (ENSGALG00000001049)	ENSGALT00000107005 (MTMR4)
B Cell	ENSGALT00000108031 (ENSGALG00000001049)	ENSGALT00000107005 (MTMR4)
B Cell	ENSGALT00000094278 (ABCF2)	ENSGALT00000097080 (AGAP3)
B Cell	ENSGALT00000092482 (ENSGALG00000039186)	ENSGALT00000063763 (WAC)
B Cell	ENSGALT00000090361 (METTL6)	ENSGALT00000065313 (EAF1)
B Cell	ENSGALT00000057417 (METTL6)	ENSGALT00000065313 (EAF1)
B Cell	ENSGALT00000041883 (7SK)	ENSGALT00000061461 (TPK1)
B Cell	ENSGALT00000098666 (PIGN)	ENSGALT00000061204 (RELCH)
B Cell	ENSGALT00000091120 (PIGN)	ENSGALT00000061204 (RELCH)
B Cell	ENSGALT00000090803 (PIGN)	ENSGALT00000061204 (RELCH)
B Cell	ENSGALT00000021148 (ANKH)	ENSGALT00000071221 (TRIO)
B Cell	ENSGALT00000101080 (ENSGALG00000049889)	ENSGALT00000071221 (TRIO)
B Cell	ENSGALT00000075665 (ATPSCKMT)	ENSGALT00000021286 (CCT5)
B Cell	ENSGALT00000062246 (NFS1)	ENSGALT00000085125 (ROMO1)
B Cell	ENSGALT00000085747 (RPN2)	ENSGALT00000006098 (GHRH)
B Cell	ENSGALT00000080339 (ENSGALG00000038484)	ENSGALT00000047845 (PKIG)
B Cell	ENSGALT00000073180 (CTSZ)	ENSGALT00000095073 (GNAS)
B Cell	ENSGALT00000091515 (ENSGALG00000052083)	ENSGALT00000101786 (PTPN1)
B Cell	ENSGALT00000067924 (MAD2L2)	ENSGALT00000100757 (ENSGALG00000004646)
B Cell	ENSGALT00000007392 (MAD2L2)	ENSGALT00000100757 (ENSGALG00000004646)
B Cell	ENSGALT00000101463 (BIN3)	ENSGALT00000107450 (ENSGALG00000052840)
B Cell	ENSGALT00000071498 (OGDH)	ENSGALT00000093024 (ENSGALG00000047157)
B Cell	ENSGALT00000000876 (ZCCHC17)	ENSGALT00000041219 (NWD1)
B Cell	ENSGALT00000106377 (PAFAH2)	ENSGALT00000053717 (ENSGALG00000043829)
B Cell	ENSGALT00000106916 (LYPLA2)	ENSGALT00000107700 (GALE)
B Cell	ENSGALT00000101477 (NNF1)	ENSGALT00000094228 (ENSGALG00000051101)
B Cell	ENSGALT00000094196 (ENSGALG00000052789)	ENSGALT00000094228 (ENSGALG00000051101)
B Cell	ENSGALT00000070835 (HYLS1)	ENSGALT00000041115 (RPUSD4)
B Cell	ENSGALT00000102456 (ENSGALG00000052833)	ENSGALT00000040801 (PDZD3)
B Cell	ENSGALT00000102697 (ENSGALG00000052849)	ENSGALT00000098340 (ENSGALG00000048712)
B Cell	ENSGALT00000048967 (SYPL2)	ENSGALT00000074807 (PSMA5)
B Cell	ENSGALT00000097072 (ENSGALG00000053036)	ENSGALT00000045498 (ENSGALG00000028346)
B Cell	ENSGALT00000102396 (RASSF5)	ENSGALT00000001255 (EIF2D)
B Cell	ENSGALT00000066456 (APBA3)	ENSGALT00000045101 (MRPL54)
B Cell	ENSGALT00000089785 (DAZAP1)	ENSGALT00000097870 (ENSGALG00000040182)
B Cell	ENSGALT00000005915 (HAUS8)	ENSGALT00000076764 (MYO9B)
B Cell	ENSGALT00000066674 (VRK2)	ENSGALT00000067764 (FANCL)
B Cell	ENSGALT00000013911 (KLHDC3)	ENSGALT00000060209 (MEA1)
B Cell	ENSGALT00000107069 (AFTPH)	ENSGALT00000044202 (SERTAD2)
B Cell	ENSGALT00000022442 (GALM)	ENSGALT00000077309 (ENSGALG00000038528)
B Cell	ENSGALT00000066689 (ESRRG)	ENSGALT00000093928 (ENSGALG00000041996)
B Cell	ENSGALT00000015707 (ESRRG)	ENSGALT00000093928 (ENSGALG00000041996)
B Cell	ENSGALT00000057338 (PACC1)	ENSGALT00000015969 (NENF)
B Cell	ENSGALT00000104778 (PACC1)	ENSGALT00000015969 (NENF)
B Cell	ENSGALT00000105346 (INTS7)	ENSGALT00000015990 (DTL)
B Cell	ENSGALT00000016035 (RD3)	ENSGALT00000059490 (ENSGALG00000042313)
B Cell	ENSGALT00000107158 (RBKS)	ENSGALT00000016306 (BRE)
B Cell	ENSGALT00000016321 (RBKS)	ENSGALT00000107891 (MRPL33)
B Cell	ENSGALT00000104183 (ENSGALG00000054532)	ENSGALT00000017157 (BIRC6)
B Cell	ENSGALT00000022585 (BCLAF1)	ENSGALT00000099496 (PDE7B)
B Cell	ENSGALT00000024010 (FAM184A)	ENSGALT00000090776 (ENSGALG00000048854)
B Cell	ENSGALT00000102791 (FAM184A)	ENSGALT00000090776 (ENSGALG00000048854)
B Cell	ENSGALT00000046917 (FAM184A)	ENSGALT00000090776 (ENSGALG00000048854)
B Cell	ENSGALT00000098629 (ZUP1)	ENSGALT00000024093 (KPNA5)
B Cell	ENSGALT00000024133 (ENSGALG00000014965)	ENSGALT00000061867 (NT5DC1)
B Cell	ENSGALT00000025553 (ME1)	ENSGALT00000025556 (RWDD2A)
B Cell	ENSGALT00000096920 (ANGPT2)	ENSGALT00000086126 (MCPH1)
B Cell	ENSGALT00000093677 (ENSGALG00000038666)	ENSGALT00000081607 (UBL5)
B Cell	ENSGALT00000095132 (ENSGALG00000052207)	ENSGALT00000082934 (ENSGALG00000047610)
B Cell	ENSGALT00000093709 (AWAT1)	ENSGALT00000006933 (P2RY4)
B Cell	ENSGALT00000043056 (CCNB3)	ENSGALT00000006097 (ENSGALG00000003841)
B Cell	ENSGALT00000084748 (CCNB3)	ENSGALT00000006097 (ENSGALG00000003841)
B Cell	ENSGALT00000087904 (CCNB3)	ENSGALT00000006097 (ENSGALG00000003841)
B Cell	ENSGALT00000104049 (ENSGALG00000051025)	ENSGALT00000080817 (ENSGALG00000029462)
B Cell	ENSGALT00000071251 (NRK)	ENSGALT00000107288 (ENSGALG00000051675)
B Cell	ENSGALT00000089284 (ETFDH)	ENSGALT00000096658 (C4orf46)
B Cell	ENSGALT00000076253 (RAPGEF2)	ENSGALT00000093685 (ENSGALG00000050541)
B Cell	ENSGALT00000080651 (RAPGEF2)	ENSGALT00000093685 (ENSGALG00000050541)
B Cell	ENSGALT00000101264 (SCLT1)	ENSGALT00000016460 (CDKL2)
B Cell	ENSGALT00000058575 (ENSGALG00000042969)	ENSGALT00000106778 (ENSGALG00000053861)
B Cell	ENSGALT00000099383 (NUDT6)	ENSGALT00000085206 (SPATA5)
B Cell	ENSGALT00000085262 (NOP56)	ENSGALT00000052568 (IDH3B)
B Cell	ENSGALT00000084003 (NOP56)	ENSGALT00000052568 (IDH3B)
B Cell	ENSGALT00000066589 (CEND1)	ENSGALT00000086673 (NLRP3)
B Cell	ENSGALT00000105660 (ELP4)	ENSGALT00000031814 (IMMP1L)
B Cell	ENSGALT00000092474 (ELP4)	ENSGALT00000031814 (IMMP1L)
B Cell	ENSGALT00000103240 (ELP4)	ENSGALT00000031814 (IMMP1L)
B Cell	ENSGALT00000096280 (ENSGALG00000030266)	ENSGALT00000099941 (HIPK3)
B Cell	ENSGALT00000013128 (KBTBD4)	ENSGALT00000013121 (NDUFS3)
B Cell	ENSGALT00000087710 (SLIRP)	ENSGALT00000017074 (ALKBH1)
B Cell	ENSGALT00000019771 (EXOC5)	ENSGALT00000019765 (AP5M1)
B Cell	ENSGALT00000101028 (LRR1)	ENSGALT00000019972 (RPS29)
B Cell	ENSGALT00000020080 (ATP5S)	ENSGALT00000020088 (CDKL1)
B Cell	ENSGALT00000084213 (ENSGALG00000040737)	ENSGALT00000071346 (ENSGALG00000043130)
B Cell	ENSGALT00000012572 (POLL)	ENSGALT00000012535 (DPCD)
B Cell	ENSGALT00000014159 (PDCD4)	ENSGALT00000057879 (BBIP1)
B Cell	ENSGALT00000089567 (PDCD4)	ENSGALT00000057879 (BBIP1)
B Cell	ENSGALT00000090332 (PDCD4)	ENSGALT00000057879 (BBIP1)
B Cell	ENSGALT00000090535 (ORMDL1)	ENSGALT00000075877 (PMS1)
B Cell	ENSGALT00000098426 (ENSGALG00000050736)	ENSGALT00000086291 (FAM102B)
B Cell	ENSGALT00000078291 (KLHL20)	ENSGALT00000085107 (CENPL)
B Cell	ENSGALT00000033221 (FAM183A)	ENSGALT00000014724 (EBNA1BP2)
B Cell	ENSGALT00000095537 (SZT2)	ENSGALT00000016237 (MED8)
B Cell	ENSGALT00000101069 (SZT2)	ENSGALT00000016237 (MED8)
B Cell	ENSGALT00000095686 (SZT2)	ENSGALT00000016237 (MED8)
B Cell	ENSGALT00000033166 (ARMH1)	ENSGALT00000097075 (KIF2C)
B Cell	ENSGALT00000106714 (MRPL37)	ENSGALT00000017496 (ENSGALG00000010758)
B Cell	ENSGALT00000055431 (FGGY)	ENSGALT00000038039 (JUN)
B Cell	ENSGALT00000092864 (CEP19)	ENSGALT00000090549 (NRROS)
B Cell	ENSGALT00000011301 (ENSGALG00000006976)	ENSGALT00000011255 (BDH1A)
B Cell	ENSGALT00000061761 (MCF2L2)	ENSGALT00000058942 (B3GNT5)
B Cell	ENSGALT00000084927 (ENSGALG00000044630)	ENSGALT00000092163 (ENSGALG00000051188)
B Cell	ENSGALT00000093618 (ENSGALG00000046865)	ENSGALT00000087061 (ENSGALG00000044984)
B Cell	ENSGALT00000101593 (ENSGALG00000048931)	ENSGALT00000087699 (ENSGALG00000054710)
B Cell	ENSGALT00000101341 (ENSGALG00000047180)	ENSGALT00000087699 (ENSGALG00000054710)
B Cell	ENSGALT00000100840 (ENSGALG00000048139)	ENSGALT00000098651 (ENSGALG00000052270)
B Cell	ENSGALT00000103847 (COLGALT1)	ENSGALT00000107074 (PRKCSH)
B Cell	ENSGALT00000101669 (COLGALT1)	ENSGALT00000107074 (PRKCSH)
B Cell	ENSGALT00000098903 (ENSGALG00000051123)	ENSGALT00000048652 (ENSGALG00000027170)
B Cell	ENSGALT00000104004 (ENSGALG00000052041)	ENSGALT00000074031 (ENSGALG00000038064)
B Cell	ENSGALT00000080085 (ENSGALG00000035780)	ENSGALT00000099413 (ENSGALG00000049534)
B Cell	ENSGALT00000039477 (IFNW1)	ENSGALT00000095477 (ENSGALG00000013809)
B Cell	ENSGALT00000101642 (IFN-A)	ENSGALT00000095477 (ENSGALG00000013809)
B Cell	ENSGALT00000092218 (IFN-A)	ENSGALT00000095477 (ENSGALG00000013809)
B Cell	ENSGALT00000100222 (ENSGALG00000054396)	ENSGALT00000095477 (ENSGALG00000013809)
B Cell	ENSGALT00000091729 (IFN-A)	ENSGALT00000095477 (ENSGALG00000013809)
B Cell	ENSGALT00000102661 (IFN-A)	ENSGALT00000095477 (ENSGALG00000013809)
B Cell	ENSGALT00000083687 (ENSGALG00000044725)	ENSGALT00000095477 (ENSGALG00000013809)
B Cell	ENSGALT00000107243 (IFN-A)	ENSGALT00000095477 (ENSGALG00000013809)
B Cell	ENSGALT00000096515 (ENSGALG00000052209)	ENSGALT00000095477 (ENSGALG00000013809)
B Cell	ENSGALT00000099239 (ENSGALG00000053207)	ENSGALT00000095477 (ENSGALG00000013809)
B Cell	ENSGALT00000019338 (ENSGALG00000054104)	ENSGALT00000095477 (ENSGALG00000013809)
B Cell	ENSGALT00000091848 (ENSGALG00000047915)	ENSGALT00000107627 (ENSGALG00000050110)
Bursa	ENSGALT00000013282 (GDI1)	ENSGALT00000096902 (TASOR2)
Bursa	ENSGALT00000011632 (ERGIC2)	ENSGALT00000104032 (LAMB1)
Bursa	ENSGALT00000020831 (ENSGALG00000012766)	ENSGALT00000090916 (CHPT1)
Bursa	ENSGALT00000094657 (ENSGALG00000053936)	ENSGALT00000101905 (BID)
Bursa	ENSGALT00000093471 (ENSGALG00000053936)	ENSGALT00000101905 (BID)
Bursa	ENSGALT00000091338 (ABCC9)	ENSGALT00000092742 (ENSGALG00000053183)
Bursa	ENSGALT00000060327 (ENSGALG00000048687)	ENSGALT00000104378 (ENSGALG00000050747)
Bursa	ENSGALT00000092442 (ENSGALG00000049912)	ENSGALT00000103647 (ENSGALG00000052801)
Bursa	ENSGALT00000060423 (NAA50)	ENSGALT00000093236 (ATP6V1A)
Bursa	ENSGALT00000030337 (GATD3A)	ENSGALT00000101667 (ENSGALG00000052076)
Bursa	ENSGALT00000027117 (C1H2ORF49)	ENSGALT00000027119 (FHL2)
Bursa	ENSGALT00000027298 (UGGT2)	ENSGALT00000089693 (DNAJC3)
Bursa	ENSGALT00000036465 (SUPT20H)	ENSGALT00000106619 (EXOSC8)
Bursa	ENSGALT00000036439 (GJB2)	ENSGALT00000105211 (ENSGALG00000048789)
Bursa	ENSGALT00000034521 (MCEE)	ENSGALT00000090859 (MPHOSPH10)
Bursa	ENSGALT00000090436 (APBA2)	ENSGALT00000090859 (MPHOSPH10)
Bursa	ENSGALT00000008632 (WWOX)	ENSGALT00000104098 (ENSGALG00000050479)
Bursa	ENSGALT00000044355 (DEF8)	ENSGALT00000076178 (DBNDD1)
Bursa	ENSGALT00000090731 (BRI3)	ENSGALT00000106627 (TECPR1)
Bursa	ENSGALT00000090507 (VASN)	ENSGALT00000067660 (CORO7)
Bursa	ENSGALT00000096935 (DNAJA3)	ENSGALT00000067660 (CORO7)
Bursa	ENSGALT00000012696 (DNAJA3)	ENSGALT00000067660 (CORO7)
Bursa	ENSGALT00000073893 (DNAJA3)	ENSGALT00000067660 (CORO7)
Bursa	ENSGALT00000098425 (COMT)	ENSGALT00000079571 (TXNRD2)
Bursa	ENSGALT00000000183 (BLEC1)	ENSGALT00000068635 (BLB1)
Bursa	ENSGALT00000076895 (DPP7)	ENSGALT00000106784 (ENSGALG00000047814)
Bursa	ENSGALT00000039770 (SPTAN1)	ENSGALT00000075115 (WDR34)
Bursa	ENSGALT00000005036 (ENSGALG00000003175)	ENSGALT00000091916 (REXO4)
Bursa	ENSGALT00000090702 (MVB12B)	ENSGALT00000042544 (NRON)
Bursa	ENSGALT00000071239 (MVB12B)	ENSGALT00000042544 (NRON)
Bursa	ENSGALT00000001402 (MVB12B)	ENSGALT00000042544 (NRON)
Bursa	ENSGALT00000004723 (UTP18)	ENSGALT00000055662 (MBTD1)
Bursa	ENSGALT00000088357 (TMEM120A)	ENSGALT00000003192 (POR)
Bursa	ENSGALT00000008627 (ZNHIT3)	ENSGALT00000039165 (MYO19)
Bursa	ENSGALT00000050118 (EVI2A)	ENSGALT00000009081 (NF1)
Bursa	ENSGALT00000068634 (ENSGALG00000035589)	ENSGALT00000009081 (NF1)
Bursa	ENSGALT00000008974 (OMG)	ENSGALT00000009081 (NF1)
Bursa	ENSGALT00000097782 (ENSGALG00000035994)	ENSGALT00000100485 (TFPI2)
Bursa	ENSGALT00000070014 (CX3CR1)	ENSGALT00000097414 (ENSGALG00000053738)
Bursa	ENSGALT00000091120 (PIGN)	ENSGALT00000099669 (RELCH)
Bursa	ENSGALT00000059601 (PTDSS1)	ENSGALT00000088465 (MTERF3)
Bursa	ENSGALT00000099575 (ENSGALG00000036635)	ENSGALT00000093154 (ENSGALG00000051634)
Bursa	ENSGALT00000075646 (ENSGALG00000004110)	ENSGALT00000067829 (STK4)
Bursa	ENSGALT00000006537 (ENSGALG00000004110)	ENSGALT00000067829 (STK4)
Bursa	ENSGALT00000085389 (SIRPA)	ENSGALT00000097226 (gga-mir-12243)
Bursa	ENSGALT00000092014 (TNFRSF9)	ENSGALT00000083827 (PARK7)
Bursa	ENSGALT00000101019 (ENSGALG00000046740)	ENSGALT00000095075 (XPO7)
Bursa	ENSGALT00000046784 (IKBKB)	ENSGALT00000085685 (ENSGALG00000041463)
Bursa	ENSGALT00000046476 (TIRAP)	ENSGALT00000061538 (FAM118B)
Bursa	ENSGALT00000078850 (TIRAP)	ENSGALT00000061538 (FAM118B)
Bursa	ENSGALT00000073377 (RAB25)	ENSGALT00000097066 (ENSGALG00000050392)
Bursa	ENSGALT00000052400 (ENSGALG00000037802)	ENSGALT00000097066 (ENSGALG00000050392)
Bursa	ENSGALT00000066976 (S100A11)	ENSGALT00000069323 (COPA)
Bursa	ENSGALT00000045737 (SNAPIN)	ENSGALT00000055413 (ILF2)
Bursa	ENSGALT00000002093 (TRAF3IP3)	ENSGALT00000002243 (INKA2)
Bursa	ENSGALT00000045280 (DCLRE1B)	ENSGALT00000071936 (ENSGALG00000053784)
Bursa	ENSGALT00000087871 (PSME3)	ENSGALT00000083880 (BECN1)
Bursa	ENSGALT00000102211 (CFD)	ENSGALT00000072682 (MED16)
Bursa	ENSGALT00000060660 (DAZAP1)	ENSGALT00000071548 (ENSGALG00000040182)
Bursa	ENSGALT00000005915 (HAUS8)	ENSGALT00000060050 (MYO9B)
Bursa	ENSGALT00000057642 (CEP68)	ENSGALT00000071042 (RAB1B)
Bursa	ENSGALT00000051279 (AARS2)	ENSGALT00000068244 (RNF8)
Bursa	ENSGALT00000076094 (AARS2)	ENSGALT00000068244 (RNF8)
Bursa	ENSGALT00000018217 (PSMB1)	ENSGALT00000084343 (TBP)
Bursa	ENSGALT00000062957 (CEP85L)	ENSGALT00000044362 (PLN)
Bursa	ENSGALT00000053346 (CEP85L)	ENSGALT00000044362 (PLN)
Bursa	ENSGALT00000093863 (ILVBL)	ENSGALT00000102499 (ENSGALG00000052865)
Bursa	ENSGALT00000107057 (ENSGALG00000047412)	ENSGALT00000096794 (ENSGALG00000054250)
Bursa	ENSGALT00000093505 (ENSGALG00000047202)	ENSGALT00000084735 (ENSGALG00000046730)
Bursa	ENSGALT00000105145 (ENSGALG00000047565)	ENSGALT00000103066 (ENSGALG00000053973)
Bursa	ENSGALT00000038777 (APELA)	ENSGALT00000015511 (TMEM192)
Bursa	ENSGALT00000070694 (HHIP)	ENSGALT00000094636 (ANAPC10)
Bursa	ENSGALT00000107607 (SCLT1)	ENSGALT00000107525 (ENSGALG00000010108)
Bursa	ENSGALT00000032215 (CENPU)	ENSGALT00000095844 (PRIMPOL)
Bursa	ENSGALT00000028196 (LCORL)	ENSGALT00000023302 (NCAPG)
Bursa	ENSGALT00000090978 (ENSGALG00000051383)	ENSGALT00000023302 (NCAPG)
Bursa	ENSGALT00000065542 (ENSGALG00000054173)	ENSGALT00000023302 (NCAPG)
Bursa	ENSGALT00000070945 (SBF2)	ENSGALT00000105733 (ENSGALG00000055007)
Bursa	ENSGALT00000009170 (SBF2)	ENSGALT00000105733 (ENSGALG00000055007)
Bursa	ENSGALT00000065948 (ENSGALG00000030338)	ENSGALT00000011857 (CTNND1)
Bursa	ENSGALT00000093657 (ENSGALG00000051988)	ENSGALT00000071117 (ENSGALG00000043474)
Bursa	ENSGALT00000028069 (ERH)	ENSGALT00000096274 (SLC39A9)
Bursa	ENSGALT00000069654 (SIX1)	ENSGALT00000106645 (ENSGALG00000047571)
Bursa	ENSGALT00000007929 (POLR3A)	ENSGALT00000007776 (RPS24)
Bursa	ENSGALT00000094369 (ENSGALG00000038416)	ENSGALT00000093742 (ENSGALG00000049341)
Bursa	ENSGALT00000060533 (ENSGALG00000038416)	ENSGALT00000093742 (ENSGALG00000049341)
Bursa	ENSGALT00000015203 (FAM45A)	ENSGALT00000090721 (SFXN4)
Bursa	ENSGALT00000023090 (CIR1)	ENSGALT00000067425 (SCRN3)
Bursa	ENSGALT00000067019 (DNPEP)	ENSGALT00000047160 (ENSGALG00000043198)
Bursa	ENSGALT00000072293 (PTPRN)	ENSGALT00000047160 (ENSGALG00000043198)
Bursa	ENSGALT00000018510 (CNPPD1)	ENSGALT00000053169 (ENSGALG00000033452)
Bursa	ENSGALT00000100758 (ENSGALG00000046969)	ENSGALT00000102837 (ENSGALG00000054339)
Bursa	ENSGALT00000019931 (ENSGALG00000012207)	ENSGALT00000102837 (ENSGALG00000054339)
Bursa	ENSGALT00000106545 (ENSGALG00000054302)	ENSGALT00000053416 (NR5A2)
Bursa	ENSGALT00000105920 (ENSGALG00000054302)	ENSGALT00000053416 (NR5A2)
Bursa	ENSGALT00000091029 (ENSGALG00000054260)	ENSGALT00000053416 (NR5A2)
Bursa	ENSGALT00000006824 (ANGPTL1)	ENSGALT00000064580 (RALGPS2)
Bursa	ENSGALT00000017089 (SLC5A9)	ENSGALT00000074365 (SPATA6)
Bursa	ENSGALT00000004364 (ATP1B3)	ENSGALT00000048439 (TFDP2)
Bursa	ENSGALT00000049432 (ENSGALG00000030075)	ENSGALT00000062132 (ENSGALG00000043610)
Bursa	ENSGALT00000092795 (COLGALT1)	ENSGALT00000095841 (PRKCSH)
Bursa	ENSGALT00000071193 (SHLD3)	ENSGALT00000054079 (TRIM23)
Bursa	ENSGALT00000023818 (TRAPPC13)	ENSGALT00000054079 (TRIM23)
Bursa	ENSGALT00000089674 (TRAPPC13)	ENSGALT00000054079 (TRIM23)
Bursa	ENSGALT00000038562 (F2RL2)	ENSGALT00000024162 (IQGAP2)
Bursa	ENSGALT00000023330 (CDC37L1)	ENSGALT00000070737 (AK3)
Bursa	ENSGALT00000028137 (OSTF1)	ENSGALT00000103203 (NMRK1)
Bursa	ENSGALT00000062315 (TTC37)	ENSGALT00000063159 (ARSK)
Bursa	ENSGALT00000023641 (TTC37)	ENSGALT00000063159 (ARSK)
Bursa	ENSGALT00000013281 (ANKRD16)	ENSGALT00000092270 (FBXO18)
Bursa	ENSGALT00000103153 (ENSGALG00000051944)	ENSGALT00000101371 (BICD1)
Bursa	ENSGALT00000022724 (ETFRF1)	ENSGALT00000063877 (KRAS)
Bursa	ENSGALT00000099773 (ENSGALG00000052513)	ENSGALT00000023174 (TSPAN9)
Bursa	ENSGALT00000081603 (ENSGALG00000040898)	ENSGALT00000102923 (ENSGALG00000050907)
Bursa	ENSGALT00000082160 (NME7)	ENSGALT00000036926 (ATP1B1)
Bursa	ENSGALT00000094022 (NME7)	ENSGALT00000036926 (ATP1B1)
Bursa	ENSGALT00000036897 (HHLA2)	ENSGALT00000024781 (IFT57)
Bursa	ENSGALT00000098860 (ENSGALG00000054836)	ENSGALT00000024790 (KIAA1524)
Bursa	ENSGALT00000036866 (ENSGALG00000024077)	ENSGALT00000070424 (MINA)
Bursa	ENSGALT00000098683 (ENSGALG00000048974)	ENSGALT00000095463 (ROBO2)
Bursa	ENSGALT00000053149 (CASK)	ENSGALT00000026167 (GPR34)
Bursa	ENSGALT00000080819 (CASK)	ENSGALT00000026167 (GPR34)
Bursa	ENSGALT00000098634 (ENSGALG00000052492)	ENSGALT00000049598 (FRMPD4)
Bursa	ENSGALT00000106662 (ENSGALG00000047786)	ENSGALT00000027247 (ITGBL1)
Bursa	ENSGALT00000108240 (RB1)	ENSGALT00000027460 (LPAR6)
Bursa	ENSGALT00000085752 (RB1)	ENSGALT00000027460 (LPAR6)
Bursa	ENSGALT00000096056 (ENSGALG00000053592)	ENSGALT00000027571 (PDS5B)
Bursa	ENSGALT00000028519 (ENSGALG00000017812)	ENSGALT00000060059 (ENSGALG00000040433)
Bursa	ENSGALT00000028521 (ENSGALG00000017814)	ENSGALT00000060059 (ENSGALG00000040433)
Bursa	ENSGALT00000028522 (ENSGALG00000017815)	ENSGALT00000060059 (ENSGALG00000040433)
Bursa	ENSGALT00000041478 (ENSGALG00000024565)	ENSGALT00000060059 (ENSGALG00000040433)
Bursa	ENSGALT00000053720 (WDR61)	ENSGALT00000034639 (CRABP-I)
Bursa	ENSGALT00000028047 (C11H16ORF87)	ENSGALT00000055464 (GPT2)
Bursa	ENSGALT00000063003 (SS18L2)	ENSGALT00000076733 (KIAA0355)
Bursa	ENSGALT00000088365 (UTP4)	ENSGALT00000058298 (CHTF8)
Bursa	ENSGALT00000086207 (UTP4)	ENSGALT00000058298 (CHTF8)
Bursa	ENSGALT00000001336 (ADAT1)	ENSGALT00000096189 (GABARAPL2)
Bursa	ENSGALT00000101522 (RNF123)	ENSGALT00000105582 (AMIGO3)
Bursa	ENSGALT00000089067 (EMC3)	ENSGALT00000005906 (FANCD2)
Bursa	ENSGALT00000047782 (TSEN2)	ENSGALT00000043832 (MKRN2OS)
Bursa	ENSGALT00000071421 (GPR146)	ENSGALT00000103266 (C7orf50)
Bursa	ENSGALT00000008486 (GNG13)	ENSGALT00000057565 (CHTF18)
Bursa	ENSGALT00000106881 (LYRM1)	ENSGALT00000080718 (DCUN1D3)
Bursa	ENSGALT00000104055 (LYRM1)	ENSGALT00000080718 (DCUN1D3)
Bursa	ENSGALT00000093515 (LYRM1)	ENSGALT00000080718 (DCUN1D3)
Bursa	ENSGALT00000100299 (ENSGALG00000046685)	ENSGALT00000098431 (ENSGALG00000050166)
Bursa	ENSGALT00000057304 (PI4KA)	ENSGALT00000063276 (SERPIND1)
Bursa	ENSGALT00000062710 (PI4KA)	ENSGALT00000063276 (SERPIND1)
Bursa	ENSGALT00000098294 (PI4KA)	ENSGALT00000063276 (SERPIND1)
Bursa	ENSGALT00000104374 (MRPL40)	ENSGALT00000077327 (HIRA)
Bursa	ENSGALT00000103912 (COMT)	ENSGALT00000107088 (TXNRD2)
Bursa	ENSGALT00000091250 (ENSGALG00000047380)	ENSGALT00000046723 (ENSGALG00000049208)
Bursa	ENSGALT00000086006 (ENSGALG00000050091)	ENSGALT00000054691 (ENSGALG00000047627)
Bursa	ENSGALT00000000109 (IL4I1)	ENSGALT00000060138 (TRIM7.2)
Bursa	ENSGALT00000091355 (ENSGALG00000050552)	ENSGALT00000073089 (CLIC3)
Bursa	ENSGALT00000094763 (GSN)	ENSGALT00000034894 (STOM)
Bursa	ENSGALT00000100406 (B3GNTL1)	ENSGALT00000039250 (TBCD)
Bursa	ENSGALT00000105612 (CENPX)	ENSGALT00000004537 (LRRC45)
Bursa	ENSGALT00000052025 (DDX25)	ENSGALT00000073675 (ENSGALG00000033320)
Bursa	ENSGALT00000101743 (ENSGALG00000051520)	ENSGALT00000040248 (HSPB1)
Bursa	ENSGALT00000094278 (ABCF2)	ENSGALT00000097080 (AGAP3)
Bursa	ENSGALT00000092482 (ENSGALG00000039186)	ENSGALT00000063763 (WAC)
Bursa	ENSGALT00000021148 (ANKH)	ENSGALT00000071221 (TRIO)
Bursa	ENSGALT00000101080 (ENSGALG00000049889)	ENSGALT00000071221 (TRIO)
Bursa	ENSGALT00000107300 (RDH10)	ENSGALT00000066511 (RPL7)
Bursa	ENSGALT00000104755 (ENSGALG00000053033)	ENSGALT00000055546 (MMP16)
Bursa	ENSGALT00000062246 (NFS1)	ENSGALT00000085125 (ROMO1)
Bursa	ENSGALT00000033797 (ENSGALG00000021025)	ENSGALT00000078202 (BCL2L1)
Bursa	ENSGALT00000094172 (TTLL9)	ENSGALT00000010407 (DUSP15)
Bursa	ENSGALT00000096198 (ENSGALG00000047598)	ENSGALT00000092470 (ENSGALG00000039525)
Bursa	ENSGALT00000071498 (OGDH)	ENSGALT00000093024 (ENSGALG00000047157)
Bursa	ENSGALT00000000876 (ZCCHC17)	ENSGALT00000041219 (NWD1)
Bursa	ENSGALT00000094196 (ENSGALG00000052789)	ENSGALT00000094228 (ENSGALG00000051101)
Bursa	ENSGALT00000102697 (ENSGALG00000052849)	ENSGALT00000098340 (ENSGALG00000048712)
Bursa	ENSGALT00000058400 (NDUFS2)	ENSGALT00000092700 (ENSGALG00000052689)
Bursa	ENSGALT00000048967 (SYPL2)	ENSGALT00000074807 (PSMA5)
Bursa	ENSGALT00000090816 (PROK1)	ENSGALT00000000572 (LAMTOR5)
Bursa	ENSGALT00000066456 (APBA3)	ENSGALT00000045101 (MRPL54)
Bursa	ENSGALT00000089785 (DAZAP1)	ENSGALT00000097870 (ENSGALG00000040182)
Bursa	ENSGALT00000097275 (FKBP8)	ENSGALT00000076102 (KXD1)
Bursa	ENSGALT00000087251 (ASB3)	ENSGALT00000013347 (NPHP1)
Bursa	ENSGALT00000014587 (EPCAM)	ENSGALT00000014542 (FBXO11)
Bursa	ENSGALT00000107069 (AFTPH)	ENSGALT00000044202 (SERTAD2)
Bursa	ENSGALT00000022442 (GALM)	ENSGALT00000077309 (ENSGALG00000038528)
Bursa	ENSGALT00000066689 (ESRRG)	ENSGALT00000104526 (ENSGALG00000041996)
Bursa	ENSGALT00000016321 (RBKS)	ENSGALT00000107891 (MRPL33)
Bursa	ENSGALT00000104183 (ENSGALG00000054532)	ENSGALT00000017157 (BIRC6)
Bursa	ENSGALT00000022585 (BCLAF1)	ENSGALT00000099496 (PDE7B)
Bursa	ENSGALT00000098629 (ZUP1)	ENSGALT00000024093 (KPNA5)
Bursa	ENSGALT00000095132 (ENSGALG00000052207)	ENSGALT00000082934 (ENSGALG00000047610)
Bursa	ENSGALT00000100309 (CCS)	ENSGALT00000106519 (ENSGALG00000050539)
Bursa	ENSGALT00000089284 (ETFDH)	ENSGALT00000096658 (C4orf46)
Bursa	ENSGALT00000015553 (KLHL2)	ENSGALT00000028637 (7SK)
Bursa	ENSGALT00000078303 (KLHL2)	ENSGALT00000028637 (7SK)
Bursa	ENSGALT00000094936 (KLHL2)	ENSGALT00000028637 (7SK)
Bursa	ENSGALT00000093713 (KLHL2)	ENSGALT00000028637 (7SK)
Bursa	ENSGALT00000098797 (SCLT1)	ENSGALT00000016460 (CDKL2)
Bursa	ENSGALT00000097773 (CEP44)	ENSGALT00000017505 (FBXO8)
Bursa	ENSGALT00000093913 (ENSGALG00000053080)	ENSGALT00000037951 (HOPX)
Bursa	ENSGALT00000025729 (LRRTM1)	ENSGALT00000025728 (CTNNA2)
Bursa	ENSGALT00000085262 (NOP56)	ENSGALT00000052568 (IDH3B)
Bursa	ENSGALT00000084003 (NOP56)	ENSGALT00000052568 (IDH3B)
Bursa	ENSGALT00000107379 (PRMT3)	ENSGALT00000107755 (ENSGALG00000047154)
Bursa	ENSGALT00000105660 (ELP4)	ENSGALT00000031814 (IMMP1L)
Bursa	ENSGALT00000104114 (ELP4)	ENSGALT00000031814 (IMMP1L)
Bursa	ENSGALT00000092356 (ENSGALG00000053237)	ENSGALT00000013933 (INO80)
Bursa	ENSGALT00000089842 (ATL1)	ENSGALT00000020164 (SAV1)
Bursa	ENSGALT00000084213 (ENSGALG00000040737)	ENSGALT00000071346 (ENSGALG00000043130)
Bursa	ENSGALT00000082674 (RTKN2)	ENSGALT00000004693 (ZNF365)
Bursa	ENSGALT00000104224 (ENSGALG00000048276)	ENSGALT00000007651 (H2AFY2)
Bursa	ENSGALT00000012572 (POLL)	ENSGALT00000012535 (DPCD)
Bursa	ENSGALT00000089567 (PDCD4)	ENSGALT00000057879 (BBIP1)
Bursa	ENSGALT00000090332 (PDCD4)	ENSGALT00000057879 (BBIP1)
Bursa	ENSGALT00000101014 (ENSGALG00000047487)	ENSGALT00000080706 (EBF3)
Bursa	ENSGALT00000079804 (SLC25A12)	ENSGALT00000015508 (HAT1)
Bursa	ENSGALT00000078291 (KLHL20)	ENSGALT00000085107 (CENPL)
Bursa	ENSGALT00000095686 (SZT2)	ENSGALT00000016237 (MED8)
Bursa	ENSGALT00000095537 (SZT2)	ENSGALT00000016237 (MED8)
Bursa	ENSGALT00000101069 (SZT2)	ENSGALT00000016237 (MED8)
Bursa	ENSGALT00000106714 (MRPL37)	ENSGALT00000017496 (ENSGALG00000010758)
Bursa	ENSGALT00000055523 (FGGY)	ENSGALT00000038039 (JUN)
Bursa	ENSGALT00000081623 (ENSGALG00000030000)	ENSGALT00000105033 (TFDP2)
Bursa	ENSGALT00000011301 (ENSGALG00000006976)	ENSGALT00000011255 (BDH1A)
Bursa	ENSGALT00000084927 (ENSGALG00000044630)	ENSGALT00000092163 (ENSGALG00000051188)
Bursa	ENSGALT00000099888 (YF5)	ENSGALT00000092163 (ENSGALG00000051188)
Bursa	ENSGALT00000095913 (YF5)	ENSGALT00000092163 (ENSGALG00000051188)
Bursa	ENSGALT00000083547 (ENSGALG00000034584)	ENSGALT00000106921 (ENSGALG00000053757)
Bursa	ENSGALT00000056156 (ENSGALG00000034584)	ENSGALT00000106921 (ENSGALG00000053757)
Bursa	ENSGALT00000094371 (ENSGALG00000054368)	ENSGALT00000095477 (ENSGALG00000013809)
Bursa	ENSGALT00000058851 (ENSGALG00000033669)	ENSGALT00000095477 (ENSGALG00000013809)
Bursa	ENSGALT00000099239 (ENSGALG00000053207)	ENSGALT00000095477 (ENSGALG00000013809)
Bursa	ENSGALT00000023817 (TRAPPC13)	ENSGALT00000023814 (TRIM23)
Bursa	ENSGALT00000051881 (AOPEP)	ENSGALT00000107984 (ENSGALG00000052891)
Bursa	ENSGALT00000097084 (ENSGALG00000047915)	ENSGALT00000107627 (ENSGALG00000050110)
Ileum	ENSGALT00000105029 (CLC2DL3)	ENSGALT00000104150 (ENSGALG00000048857)
Ileum	ENSGALT00000013186 (RINT1)	ENSGALT00000088970 (EFCAB10)
Ileum	ENSGALT00000011632 (ERGIC2)	ENSGALT00000104032 (LAMB1)
Ileum	ENSGALT00000106807 (TMEM117)	ENSGALT00000100129 (ENSGALG00000053883)
Ileum	ENSGALT00000018475 (SNAPC3)	ENSGALT00000054741 (TMCC3)
Ileum	ENSGALT00000020381 (IL2RB)	ENSGALT00000098955 (KCTD17)
Ileum	ENSGALT00000020831 (ENSGALG00000012766)	ENSGALT00000090916 (CHPT1)
Ileum	ENSGALT00000091338 (ABCC9)	ENSGALT00000092742 (ENSGALG00000053183)
Ileum	ENSGALT00000060327 (ENSGALG00000048687)	ENSGALT00000104378 (ENSGALG00000050747)
Ileum	ENSGALT00000094503 (CCDC91)	ENSGALT00000094854 (ENSGALG00000051865)
Ileum	ENSGALT00000024984 (GPR89A)	ENSGALT00000105913 (PDZK1)
Ileum	ENSGALT00000030337 (GATD3A)	ENSGALT00000101667 (ENSGALG00000052076)
Ileum	ENSGALT00000027117 (C1H2ORF49)	ENSGALT00000027119 (FHL2)
Ileum	ENSGALT00000027298 (UGGT2)	ENSGALT00000089693 (DNAJC3)
Ileum	ENSGALT00000036465 (SUPT20H)	ENSGALT00000106619 (EXOSC8)
Ileum	ENSGALT00000090221 (MAB21L1)	ENSGALT00000107478 (NBEA)
Ileum	ENSGALT00000036439 (GJB2)	ENSGALT00000105211 (ENSGALG00000048789)
Ileum	ENSGALT00000099856 (MTMR10)	ENSGALT00000088600 (FAN1)
Ileum	ENSGALT00000074963 (SMAD3)	ENSGALT00000012808 (AAGAB)
Ileum	ENSGALT00000058562 (MYLK3)	ENSGALT00000007052 (ENSGALG00000004428)
Ileum	ENSGALT00000007726 (GPATCH1)	ENSGALT00000007532 (SLC7A10)
Ileum	ENSGALT00000007911 (SS18L2)	ENSGALT00000099809 (KIAA0355)
Ileum	ENSGALT00000008632 (WWOX)	ENSGALT00000104098 (ENSGALG00000050479)
Ileum	ENSGALT00000044355 (DEF8)	ENSGALT00000000728 (DBNDD1)
Ileum	ENSGALT00000059778 (DOCK3)	ENSGALT00000100819 (ENSGALG00000053787)
Ileum	ENSGALT00000081878 (SLC6A1)	ENSGALT00000104629 (ENSGALG00000052249)
Ileum	ENSGALT00000008865 (APPL1)	ENSGALT00000008837 (HESX1)
Ileum	ENSGALT00000013716 (CAND2)	ENSGALT00000047226 (SEC13)
Ileum	ENSGALT00000047574 (SLU7)	ENSGALT00000049104 (PTTG2)
Ileum	ENSGALT00000050464 (SLU7)	ENSGALT00000049104 (PTTG2)
Ileum	ENSGALT00000006272 (GEMIN5)	ENSGALT00000006244 (MRPL22)
Ileum	ENSGALT00000093605 (ENSGALG00000054605)	ENSGALT00000100932 (RBFOX1)
Ileum	ENSGALT00000090507 (VASN)	ENSGALT00000067660 (CORO7)
Ileum	ENSGALT00000096935 (DNAJA3)	ENSGALT00000067660 (CORO7)
Ileum	ENSGALT00000012696 (DNAJA3)	ENSGALT00000067660 (CORO7)
Ileum	ENSGALT00000073893 (DNAJA3)	ENSGALT00000067660 (CORO7)
Ileum	ENSGALT00000015164 (IFT140)	ENSGALT00000045405 (TMEM204)
Ileum	ENSGALT00000102823 (ENSGALG00000048316)	ENSGALT00000104229 (HIC2)
Ileum	ENSGALT00000098425 (COMT)	ENSGALT00000003095 (TXNRD2)
Ileum	ENSGALT00000060434 (TCTN1)	ENSGALT00000101741 (HVCN1)
Ileum	ENSGALT00000000183 (BLEC1)	ENSGALT00000068635 (BLB1)
Ileum	ENSGALT00000067722 (RPL12)	ENSGALT00000049333 (ENSGALG00000035568)
Ileum	ENSGALT00000056382 (TOR2A)	ENSGALT00000083587 (ENSGALG00000045436)
Ileum	ENSGALT00000039770 (SPTAN1)	ENSGALT00000075115 (WDR34)
Ileum	ENSGALT00000087149 (TOR1B)	ENSGALT00000099546 (PTGES)
Ileum	ENSGALT00000005036 (ENSGALG00000003175)	ENSGALT00000091916 (REXO4)
Ileum	ENSGALT00000004723 (UTP18)	ENSGALT00000055662 (MBTD1)
Ileum	ENSGALT00000107996 (STXBP4)	ENSGALT00000081876 (ENSGALG00000038873)
Ileum	ENSGALT00000053956 (ENSGALG00000037051)	ENSGALT00000098040 (ENSGALG00000048776)
Ileum	ENSGALT00000049551 (ENSGALG00000037051)	ENSGALT00000098040 (ENSGALG00000048776)
Ileum	ENSGALT00000088357 (TMEM120A)	ENSGALT00000003192 (POR)
Ileum	ENSGALT00000007038 (TTC19)	ENSGALT00000086763 (ZSWIM7)
Ileum	ENSGALT00000008627 (ZNHIT3)	ENSGALT00000039165 (MYO19)
Ileum	ENSGALT00000050118 (EVI2A)	ENSGALT00000050895 (NF1)
Ileum	ENSGALT00000068634 (ENSGALG00000035589)	ENSGALT00000050895 (NF1)
Ileum	ENSGALT00000008974 (OMG)	ENSGALT00000050895 (NF1)
Ileum	ENSGALT00000073663 (ENSGALG00000038330)	ENSGALT00000098700 (NOS3)
Ileum	ENSGALT00000086700 (NRP1)	ENSGALT00000096212 (ENSGALG00000047326)
Ileum	ENSGALT00000077652 (ENSGALG00000048869)	ENSGALT00000107989 (ENSGALG00000053860)
Ileum	ENSGALT00000065275 (CBX3)	ENSGALT00000090968 (HNRNPA2B1)
Ileum	ENSGALT00000078762 (CNTNAP2)	ENSGALT00000100952 (ENSGALG00000048525)
Ileum	ENSGALT00000091120 (PIGN)	ENSGALT00000099669 (RELCH)
Ileum	ENSGALT00000059601 (PTDSS1)	ENSGALT00000088465 (MTERF3)
Ileum	ENSGALT00000085389 (SIRPA)	ENSGALT00000097226 (gga-mir-12243)
Ileum	ENSGALT00000012067 (CTSZ)	ENSGALT00000043458 (gga-mir-6597)
Ileum	ENSGALT00000073180 (CTSZ)	ENSGALT00000043458 (gga-mir-6597)
Ileum	ENSGALT00000046784 (IKBKB)	ENSGALT00000005886 (PLAT)
Ileum	ENSGALT00000049116 (NCAPH)	ENSGALT00000107458 (ENSGALG00000050253)
Ileum	ENSGALT00000062687 (ENSGALG00000031789)	ENSGALT00000094176 (HK2)
Ileum	ENSGALT00000064031 (ADD2)	ENSGALT00000098443 (HK2)
Ileum	ENSGALT00000022512 (SNRNP27)	ENSGALT00000098443 (HK2)
Ileum	ENSGALT00000022511 (MXD1)	ENSGALT00000098443 (HK2)
Ileum	ENSGALT00000005575 (RBBP4)	ENSGALT00000097257 (ZBTB8OS)
Ileum	ENSGALT00000093495 (RBBP4)	ENSGALT00000097257 (ZBTB8OS)
Ileum	ENSGALT00000006375 (LYPLA2)	ENSGALT00000107700 (GALE)
Ileum	ENSGALT00000082329 (HYLS1)	ENSGALT00000001417 (PUS3)
Ileum	ENSGALT00000070835 (HYLS1)	ENSGALT00000001417 (PUS3)
Ileum	ENSGALT00000046476 (TIRAP)	ENSGALT00000061538 (FAM118B)
Ileum	ENSGALT00000078850 (TIRAP)	ENSGALT00000061538 (FAM118B)
Ileum	ENSGALT00000066976 (S100A11)	ENSGALT00000069323 (COPA)
Ileum	ENSGALT00000101956 (ENSGALG00000047570)	ENSGALT00000046820 (ENSGALG00000040336)
Ileum	ENSGALT00000056011 (NDUFS2)	ENSGALT00000092700 (ENSGALG00000052689)
Ileum	ENSGALT00000059836 (WNT2B)	ENSGALT00000075334 (ENSGALG00000035270)
Ileum	ENSGALT00000045280 (DCLRE1B)	ENSGALT00000071936 (ENSGALG00000053784)
Ileum	ENSGALT00000044950 (NKIRAS2)	ENSGALT00000005381 (ZNF385C)
Ileum	ENSGALT00000087871 (PSME3)	ENSGALT00000083880 (BECN1)
Ileum	ENSGALT00000102211 (CFD)	ENSGALT00000099690 (MED16)
Ileum	ENSGALT00000060660 (DAZAP1)	ENSGALT00000097870 (ENSGALG00000040182)
Ileum	ENSGALT00000057153 (RTN4)	ENSGALT00000062122 (EML6)
Ileum	ENSGALT00000102479 (RTN4)	ENSGALT00000062122 (EML6)
Ileum	ENSGALT00000010139 (GINS1)	ENSGALT00000098568 (ENSGALG00000023506)
Ileum	ENSGALT00000015469 (RAB3GAP2)	ENSGALT00000096327 (IARS2)
Ileum	ENSGALT00000016260 (RHOQ)	ENSGALT00000054390 (PIGF)
Ileum	ENSGALT00000016264 (CRIPT)	ENSGALT00000054390 (PIGF)
Ileum	ENSGALT00000084942 (CEP170)	ENSGALT00000017430 (ENSGALG00000010713)
Ileum	ENSGALT00000106583 (CEP170)	ENSGALT00000017430 (ENSGALG00000010713)
Ileum	ENSGALT00000017474 (PLD5)	ENSGALT00000097666 (ENSGALG00000054356)
Ileum	ENSGALT00000059752 (PLD5)	ENSGALT00000097666 (ENSGALG00000054356)
Ileum	ENSGALT00000072843 (UTRN)	ENSGALT00000103293 (ENSGALG00000049997)
Ileum	ENSGALT00000098691 (UTRN)	ENSGALT00000103293 (ENSGALG00000049997)
Ileum	ENSGALT00000020015 (UTRN)	ENSGALT00000103293 (ENSGALG00000049997)
Ileum	ENSGALT00000101074 (ENSGALG00000053695)	ENSGALT00000072077 (KCNQ5)
Ileum	ENSGALT00000071351 (TDRP)	ENSGALT00000026390 (FBXO25)
Ileum	ENSGALT00000093863 (ILVBL)	ENSGALT00000102499 (ENSGALG00000052865)
Ileum	ENSGALT00000107057 (ENSGALG00000047412)	ENSGALT00000096794 (ENSGALG00000054250)
Ileum	ENSGALT00000083234 (ENSGALG00000044436)	ENSGALT00000098275 (ENSGALG00000044817)
Ileum	ENSGALT00000082857 (THAP7)	ENSGALT00000076481 (ENSGALG00000034772)
Ileum	ENSGALT00000105145 (ENSGALG00000047565)	ENSGALT00000103066 (ENSGALG00000053973)
Ileum	ENSGALT00000015275 (PDGFC)	ENSGALT00000092875 (ENSGALG00000053535)
Ileum	ENSGALT00000038777 (APELA)	ENSGALT00000015511 (TMEM192)
Ileum	ENSGALT00000070694 (HHIP)	ENSGALT00000094636 (ANAPC10)
Ileum	ENSGALT00000032215 (CENPU)	ENSGALT00000095844 (PRIMPOL)
Ileum	ENSGALT00000099383 (NUDT6)	ENSGALT00000098005 (SPATA5)
Ileum	ENSGALT00000022312 (PPAT)	ENSGALT00000059706 (PAICS)
Ileum	ENSGALT00000079016 (RAD9A)	ENSGALT00000085502 (PPP1CA)
Ileum	ENSGALT00000073888 (TMEM138)	ENSGALT00000089662 (CYB561A3)
Ileum	ENSGALT00000086995 (TMEM138)	ENSGALT00000089662 (CYB561A3)
Ileum	ENSGALT00000006309 (PRMT3)	ENSGALT00000107755 (ENSGALG00000047154)
Ileum	ENSGALT00000093657 (ENSGALG00000051988)	ENSGALT00000071117 (ENSGALG00000043474)
Ileum	ENSGALT00000013368 (ACP2)	ENSGALT00000013377 (DDB2)
Ileum	ENSGALT00000037710 (TTLL5)	ENSGALT00000086882 (ENSGALG00000034354)
Ileum	ENSGALT00000089352 (TTLL5)	ENSGALT00000086882 (ENSGALG00000034354)
Ileum	ENSGALT00000020354 (ENSGALG00000012452)	ENSGALT00000103422 (FANCM)
Ileum	ENSGALT00000020371 (SOUL)	ENSGALT00000103422 (FANCM)
Ileum	ENSGALT00000070716 (FKBP3)	ENSGALT00000103422 (FANCM)
Ileum	ENSGALT00000094369 (ENSGALG00000038416)	ENSGALT00000093742 (ENSGALG00000049341)
Ileum	ENSGALT00000015203 (FAM45A)	ENSGALT00000090721 (SFXN4)
Ileum	ENSGALT00000054973 (ALDH18A1)	ENSGALT00000103444 (ENSGALG00000051783)
Ileum	ENSGALT00000054299 (MAIP1)	ENSGALT00000106701 (TYW5)
Ileum	ENSGALT00000023090 (CIR1)	ENSGALT00000067425 (SCRN3)
Ileum	ENSGALT00000015749 (METTL5)	ENSGALT00000100882 (SSB)
Ileum	ENSGALT00000018510 (CNPPD1)	ENSGALT00000053169 (ENSGALG00000033452)
Ileum	ENSGALT00000042561 (ENSGALG00000025648)	ENSGALT00000090491 (CLASP1)
Ileum	ENSGALT00000052062 (NTNG1)	ENSGALT00000107170 (ENSGALG00000048595)
Ileum	ENSGALT00000003258 (GPSM2)	ENSGALT00000068085 (CLCC1)
Ileum	ENSGALT00000106545 (ENSGALG00000054302)	ENSGALT00000082034 (NR5A2)
Ileum	ENSGALT00000105920 (ENSGALG00000054302)	ENSGALT00000082034 (NR5A2)
Ileum	ENSGALT00000091029 (ENSGALG00000054260)	ENSGALT00000082034 (NR5A2)
Ileum	ENSGALT00000006824 (ANGPTL1)	ENSGALT00000064580 (RALGPS2)
Ileum	ENSGALT00000009017 (F3)	ENSGALT00000057501 (SLC44A3)
Ileum	ENSGALT00000016649 (AKR1A1)	ENSGALT00000062686 (PRDX1)
Ileum	ENSGALT00000084097 (AKR1A1)	ENSGALT00000062686 (PRDX1)
Ileum	ENSGALT00000086151 (AKR1A1)	ENSGALT00000062686 (PRDX1)
Ileum	ENSGALT00000017089 (SLC5A9)	ENSGALT00000074365 (SPATA6)
Ileum	ENSGALT00000090404 (ENSGALG00000054726)	ENSGALT00000096462 (ENSGALG00000050045)
Ileum	ENSGALT00000046199 (THPO)	ENSGALT00000101550 (POLR2H)
Ileum	ENSGALT00000092955 (ENSGALG00000047597)	ENSGALT00000101722 (ENSGALG00000048491)
Ileum	ENSGALT00000049432 (ENSGALG00000030075)	ENSGALT00000062132 (ENSGALG00000043610)
Ileum	ENSGALT00000053568 (MT-CO1)	ENSGALT00000056830 (ENSGALG00000033462)
Ileum	ENSGALT00000003796 (GBA2)	ENSGALT00000088738 (RGP1)
Ileum	ENSGALT00000004088 (ARHGEF39)	ENSGALT00000090765 (ENSGALG00000037611)
Ileum	ENSGALT00000071193 (SHLD3)	ENSGALT00000054079 (TRIM23)
Ileum	ENSGALT00000023818 (TRAPPC13)	ENSGALT00000054079 (TRIM23)
Ileum	ENSGALT00000089674 (TRAPPC13)	ENSGALT00000054079 (TRIM23)
Ileum	ENSGALT00000038562 (F2RL2)	ENSGALT00000103925 (IQGAP2)
Ileum	ENSGALT00000023330 (CDC37L1)	ENSGALT00000070737 (AK3)
Ileum	ENSGALT00000023641 (TTC37)	ENSGALT00000063159 (ARSK)
Ileum	ENSGALT00000028259 (ENSGALG00000017558)	ENSGALT00000104288 (ENSGALG00000029118)
Ileum	ENSGALT00000106415 (ENSGALG00000017558)	ENSGALT00000104288 (ENSGALG00000029118)
Ileum	ENSGALT00000013281 (ANKRD16)	ENSGALT00000092270 (FBXO18)
Ileum	ENSGALT00000070713 (ENSGALG00000038546)	ENSGALT00000083648 (RSBN1L)
Ileum	ENSGALT00000093926 (CACNA1C)	ENSGALT00000094083 (ENSGALG00000047552)
Ileum	ENSGALT00000094891 (CACNA1C)	ENSGALT00000094083 (ENSGALG00000047552)
Ileum	ENSGALT00000107443 (CACNA1C)	ENSGALT00000094083 (ENSGALG00000047552)
Ileum	ENSGALT00000021261 (CACNA1C)	ENSGALT00000094083 (ENSGALG00000047552)
Ileum	ENSGALT00000022724 (ETFRF1)	ENSGALT00000063877 (KRAS)
Ileum	ENSGALT00000092764 (PNPLA3)	ENSGALT00000022945 (SULT4A1)
Ileum	ENSGALT00000100404 (ENSGALG00000049912)	ENSGALT00000094338 (ENSGALG00000052801)
Ileum	ENSGALT00000098920 (ENSGALG00000049912)	ENSGALT00000094338 (ENSGALG00000052801)
Ileum	ENSGALT00000094037 (ENSGALG00000050399)	ENSGALT00000084864 (ENSGALG00000014754)
Ileum	ENSGALT00000036897 (HHLA2)	ENSGALT00000024781 (IFT57)
Ileum	ENSGALT00000098860 (ENSGALG00000054836)	ENSGALT00000024790 (KIAA1524)
Ileum	ENSGALT00000095806 (ENSGALG00000047821)	ENSGALT00000024926 (ZFP92)
Ileum	ENSGALT00000098683 (ENSGALG00000048974)	ENSGALT00000095463 (ROBO2)
Ileum	ENSGALT00000080819 (CASK)	ENSGALT00000026167 (GPR34)
Ileum	ENSGALT00000053149 (CASK)	ENSGALT00000026167 (GPR34)
Ileum	ENSGALT00000104408 (CASK)	ENSGALT00000026167 (GPR34)
Ileum	ENSGALT00000059980 (CASK)	ENSGALT00000026167 (GPR34)
Ileum	ENSGALT00000107323 (RB1)	ENSGALT00000027460 (LPAR6)
Ileum	ENSGALT00000104547 (ENSGALG00000053592)	ENSGALT00000027571 (PDS5B)
Ileum	ENSGALT00000096056 (ENSGALG00000053592)	ENSGALT00000027571 (PDS5B)
Ileum	ENSGALT00000100617 (ALKBH8)	ENSGALT00000027731 (ELMOD1)
Ileum	ENSGALT00000028519 (ENSGALG00000017812)	ENSGALT00000060059 (ENSGALG00000040433)
Ileum	ENSGALT00000028521 (ENSGALG00000017814)	ENSGALT00000060059 (ENSGALG00000040433)
Ileum	ENSGALT00000028522 (ENSGALG00000017815)	ENSGALT00000060059 (ENSGALG00000040433)
Ileum	ENSGALT00000027995 (FAM168A)	ENSGALT00000086546 (ENSGALG00000044739)
Ileum	ENSGALT00000096742 (NEO1)	ENSGALT00000095654 (ENSGALG00000055009)
Ileum	ENSGALT00000053720 (WDR61)	ENSGALT00000034639 (CRABP-I)
Ileum	ENSGALT00000105452 (ENSGALG00000007248)	ENSGALT00000046722 (PCSK6)
Ileum	ENSGALT00000101967 (NUDT21)	ENSGALT00000004848 (OGFOD1)
Ileum	ENSGALT00000051074 (CEBPG)	ENSGALT00000007832 (PEPD)
Ileum	ENSGALT00000088365 (UTP4)	ENSGALT00000058298 (CHTF8)
Ileum	ENSGALT00000086207 (UTP4)	ENSGALT00000058298 (CHTF8)
Ileum	ENSGALT00000096926 (RNF123)	ENSGALT00000105582 (AMIGO3)
Ileum	ENSGALT00000101522 (RNF123)	ENSGALT00000105582 (AMIGO3)
Ileum	ENSGALT00000078253 (OGN)	ENSGALT00000007467 (CENPP)
Ileum	ENSGALT00000007945 (ENSGALG00000004955)	ENSGALT00000091165 (TIMP4)
Ileum	ENSGALT00000047782 (TSEN2)	ENSGALT00000043832 (MKRN2OS)
Ileum	ENSGALT00000107244 (TSEN2)	ENSGALT00000043832 (MKRN2OS)
Ileum	ENSGALT00000091818 (DALRD3)	ENSGALT00000011236 (WDR6)
Ileum	ENSGALT00000098062 (DALRD3)	ENSGALT00000011236 (WDR6)
Ileum	ENSGALT00000072433 (DALRD3)	ENSGALT00000011236 (WDR6)
Ileum	ENSGALT00000101948 (DALRD3)	ENSGALT00000011236 (WDR6)
Ileum	ENSGALT00000087976 (SLC25A26)	ENSGALT00000036226 (LRIG1)
Ileum	ENSGALT00000082236 (HNRNPH2)	ENSGALT00000009585 (DGUOK)
Ileum	ENSGALT00000071020 (ENSGALG00000034305)	ENSGALT00000107573 (ENSGALG00000047174)
Ileum	ENSGALT00000090731 (BRI3)	ENSGALT00000108306 (TECPR1)
Ileum	ENSGALT00000095347 (EPN2)	ENSGALT00000008174 (B9D1)
Ileum	ENSGALT00000091140 (GPRC5B)	ENSGALT00000045802 (IQCK)
Ileum	ENSGALT00000106881 (LYRM1)	ENSGALT00000080718 (DCUN1D3)
Ileum	ENSGALT00000104055 (LYRM1)	ENSGALT00000080718 (DCUN1D3)
Ileum	ENSGALT00000093515 (LYRM1)	ENSGALT00000080718 (DCUN1D3)
Ileum	ENSGALT00000062710 (PI4KA)	ENSGALT00000063276 (SERPIND1)
Ileum	ENSGALT00000057304 (PI4KA)	ENSGALT00000063276 (SERPIND1)
Ileum	ENSGALT00000105694 (ENSGALG00000048316)	ENSGALT00000090516 (HIC2)
Ileum	ENSGALT00000091250 (ENSGALG00000047380)	ENSGALT00000046723 (ENSGALG00000049208)
Ileum	ENSGALT00000065054 (ENSGALG00000039480)	ENSGALT00000060138 (TRIM7.2)
Ileum	ENSGALT00000094669 (POMT1)	ENSGALT00000005921 (UCK1)
Ileum	ENSGALT00000001535 (SCAI)	ENSGALT00000057772 (RPL35)
Ileum	ENSGALT00000103143 (SCAI)	ENSGALT00000057772 (RPL35)
Ileum	ENSGALT00000051891 (RALGPS1)	ENSGALT00000001362 (ANGPTL2)
Ileum	ENSGALT00000054976 (RALGPS1)	ENSGALT00000001362 (ANGPTL2)
Ileum	ENSGALT00000001330 (RALGPS1)	ENSGALT00000001362 (ANGPTL2)
Ileum	ENSGALT00000106384 (RALGPS1)	ENSGALT00000001362 (ANGPTL2)
Ileum	ENSGALT00000091153 (B3GNTL1)	ENSGALT00000039250 (TBCD)
Ileum	ENSGALT00000100406 (B3GNTL1)	ENSGALT00000039250 (TBCD)
Ileum	ENSGALT00000066285 (MAP2K6)	ENSGALT00000098118 (ENSGALG00000052445)
Ileum	ENSGALT00000076465 (COG1)	ENSGALT00000073416 (FAM104A)
Ileum	ENSGALT00000019296 (CANT1)	ENSGALT00000107490 (ENGASE)
Ileum	ENSGALT00000076507 (DDX25)	ENSGALT00000073675 (ENSGALG00000033320)
Ileum	ENSGALT00000048512 (ENSGALG00000037051)	ENSGALT00000073675 (ENSGALG00000033320)
Ileum	ENSGALT00000080376 (ENSGALG00000037051)	ENSGALT00000073675 (ENSGALG00000033320)
Ileum	ENSGALT00000073554 (ENSGALG00000037051)	ENSGALT00000073675 (ENSGALG00000033320)
Ileum	ENSGALT00000103112 (ENSGALG00000047563)	ENSGALT00000073675 (ENSGALG00000033320)
Ileum	ENSGALT00000108031 (ENSGALG00000001049)	ENSGALT00000107005 (MTMR4)
Ileum	ENSGALT00000097527 (ENSGALG00000001049)	ENSGALT00000107005 (MTMR4)
Ileum	ENSGALT00000101743 (ENSGALG00000051520)	ENSGALT00000040248 (HSPB1)
Ileum	ENSGALT00000091441 (ENSGALG00000038330)	ENSGALT00000090715 (NOS3)
Ileum	ENSGALT00000080314 (PARD3)	ENSGALT00000107234 (ENSGALG00000052446)
Ileum	ENSGALT00000094227 (PARD3)	ENSGALT00000107234 (ENSGALG00000052446)
Ileum	ENSGALT00000011542 (PARD3)	ENSGALT00000107234 (ENSGALG00000052446)
Ileum	ENSGALT00000067041 (PARD3)	ENSGALT00000107234 (ENSGALG00000052446)
Ileum	ENSGALT00000092482 (ENSGALG00000039186)	ENSGALT00000063763 (WAC)
Ileum	ENSGALT00000041883 (7SK)	ENSGALT00000061461 (TPK1)
Ileum	ENSGALT00000098666 (PIGN)	ENSGALT00000021033 (RELCH)
Ileum	ENSGALT00000090803 (PIGN)	ENSGALT00000021033 (RELCH)
Ileum	ENSGALT00000104755 (ENSGALG00000053033)	ENSGALT00000055546 (MMP16)
Ileum	ENSGALT00000096157 (ENSGALG00000049122)	ENSGALT00000098508 (SLA)
Ileum	ENSGALT00000062246 (NFS1)	ENSGALT00000085125 (ROMO1)
Ileum	ENSGALT00000099697 (NFS1)	ENSGALT00000085125 (ROMO1)
Ileum	ENSGALT00000085747 (RPN2)	ENSGALT00000006098 (GHRH)
Ileum	ENSGALT00000075646 (ENSGALG00000004110)	ENSGALT00000006521 (STK4)
Ileum	ENSGALT00000096198 (ENSGALG00000047598)	ENSGALT00000092470 (ENSGALG00000039525)
Ileum	ENSGALT00000039633 (UBXN10)	ENSGALT00000022927 (PLA2G5)
Ileum	ENSGALT00000104559 (ZMYND12)	ENSGALT00000095241 (PPCS)
Ileum	ENSGALT00000102597 (MIR12247-1)	ENSGALT00000093024 (ENSGALG00000047157)
Ileum	ENSGALT00000071498 (OGDH)	ENSGALT00000093024 (ENSGALG00000047157)
Ileum	ENSGALT00000108318 (OGDH)	ENSGALT00000093024 (ENSGALG00000047157)
Ileum	ENSGALT00000044183 (ENSGALG00000029066)	ENSGALT00000073836 (YTHDF2)
Ileum	ENSGALT00000094196 (ENSGALG00000052789)	ENSGALT00000059759 (ENSGALG00000029918)
Ileum	ENSGALT00000102697 (ENSGALG00000052849)	ENSGALT00000098340 (ENSGALG00000048712)
Ileum	ENSGALT00000099038 (ENSGALG00000048074)	ENSGALT00000095434 (ENSGALG00000053676)
Ileum	ENSGALT00000099192 (SYPL2)	ENSGALT00000074807 (PSMA5)
Ileum	ENSGALT00000090816 (PROK1)	ENSGALT00000000572 (LAMTOR5)
Ileum	ENSGALT00000102396 (RASSF5)	ENSGALT00000001255 (EIF2D)
Ileum	ENSGALT00000002093 (TRAF3IP3)	ENSGALT00000002243 (INKA2)
Ileum	ENSGALT00000091471 (ENSGALG00000048697)	ENSGALT00000049090 (ENSGALG00000043654)
Ileum	ENSGALT00000066456 (APBA3)	ENSGALT00000045101 (MRPL54)
Ileum	ENSGALT00000106143 (ANKLE1)	ENSGALT00000060424 (ABHD8)
Ileum	ENSGALT00000005915 (HAUS8)	ENSGALT00000048011 (MYO9B)
Ileum	ENSGALT00000066674 (VRK2)	ENSGALT00000067764 (FANCL)
Ileum	ENSGALT00000100775 (ENSGALG00000046970)	ENSGALT00000014784 (EHD3)
Ileum	ENSGALT00000060054 (MDH1)	ENSGALT00000014402 (WDPCP)
Ileum	ENSGALT00000106491 (AIDA)	ENSGALT00000015332 (BROX)
Ileum	ENSGALT00000066689 (ESRRG)	ENSGALT00000050657 (ENSGALG00000041996)
Ileum	ENSGALT00000015707 (ESRRG)	ENSGALT00000050657 (ENSGALG00000041996)
Ileum	ENSGALT00000057338 (PACC1)	ENSGALT00000015969 (NENF)
Ileum	ENSGALT00000104778 (PACC1)	ENSGALT00000015969 (NENF)
Ileum	ENSGALT00000100254 (ENSGALG00000049568)	ENSGALT00000051293 (MCFD2)
Ileum	ENSGALT00000016321 (RBKS)	ENSGALT00000107891 (MRPL33)
Ileum	ENSGALT00000104183 (ENSGALG00000054532)	ENSGALT00000017157 (BIRC6)
Ileum	ENSGALT00000101286 (PRKN)	ENSGALT00000089338 (PACRG)
Ileum	ENSGALT00000084731 (TCP1)	ENSGALT00000019060 (ACAT2)
Ileum	ENSGALT00000022585 (BCLAF1)	ENSGALT00000099496 (PDE7B)
Ileum	ENSGALT00000098629 (ZUP1)	ENSGALT00000024093 (KPNA5)
Ileum	ENSGALT00000044965 (TRAPPC3L)	ENSGALT00000067847 (FAM26E)
Ileum	ENSGALT00000097669 (ENSGALG00000051001)	ENSGALT00000025644 (CD109)
Ileum	ENSGALT00000070715 (ATP6V1C2)	ENSGALT00000026538 (PDIA6)
Ileum	ENSGALT00000093677 (ENSGALG00000038666)	ENSGALT00000081607 (UBL5)
Ileum	ENSGALT00000092669 (ENSGALG00000038666)	ENSGALT00000081607 (UBL5)
Ileum	ENSGALT00000072897 (THAP7)	ENSGALT00000064260 (ENSGALG00000034772)
Ileum	ENSGALT00000093505 (ENSGALG00000047202)	ENSGALT00000084735 (ENSGALG00000046730)
Ileum	ENSGALT00000093709 (AWAT1)	ENSGALT00000006933 (P2RY4)
Ileum	ENSGALT00000087023 (TAF7)	ENSGALT00000007977 (ENSGALG00000004975)
Ileum	ENSGALT00000104049 (ENSGALG00000051025)	ENSGALT00000080817 (ENSGALG00000029462)
Ileum	ENSGALT00000086895 (IDS)	ENSGALT00000088976 (ENSGALG00000029286)
Ileum	ENSGALT00000085471 (IDS)	ENSGALT00000088976 (ENSGALG00000029286)
Ileum	ENSGALT00000089284 (ETFDH)	ENSGALT00000096658 (C4orf46)
Ileum	ENSGALT00000076253 (RAPGEF2)	ENSGALT00000093685 (ENSGALG00000050541)
Ileum	ENSGALT00000080651 (RAPGEF2)	ENSGALT00000093685 (ENSGALG00000050541)
Ileum	ENSGALT00000015423 (RAPGEF2)	ENSGALT00000093685 (ENSGALG00000050541)
Ileum	ENSGALT00000094936 (KLHL2)	ENSGALT00000028637 (7SK)
Ileum	ENSGALT00000093713 (KLHL2)	ENSGALT00000028637 (7SK)
Ileum	ENSGALT00000079708 (GTF2E2)	ENSGALT00000093271 (SMIM18)
Ileum	ENSGALT00000071528 (WDFY3)	ENSGALT00000099081 (PPM1K)
Ileum	ENSGALT00000071610 (IGFBP7)	ENSGALT00000037965 (POLR2B)
Ileum	ENSGALT00000093913 (ENSGALG00000053080)	ENSGALT00000037951 (HOPX)
Ileum	ENSGALT00000080600 (USP46)	ENSGALT00000096732 (ENSGALG00000054475)
Ileum	ENSGALT00000025729 (LRRTM1)	ENSGALT00000025728 (CTNNA2)
Ileum	ENSGALT00000088776 (ENSGALG00000044501)	ENSGALT00000073493 (ENSGALG00000036547)
Ileum	ENSGALT00000052576 (ENSGALG00000052156)	ENSGALT00000078117 (ENSGALG00000041205)
Ileum	ENSGALT00000105660 (ELP4)	ENSGALT00000031814 (IMMP1L)
Ileum	ENSGALT00000092474 (ELP4)	ENSGALT00000031814 (IMMP1L)
Ileum	ENSGALT00000103240 (ELP4)	ENSGALT00000031814 (IMMP1L)
Ileum	ENSGALT00000104114 (ELP4)	ENSGALT00000019804 (PAX6)
Ileum	ENSGALT00000055681 (ENSGALG00000030266)	ENSGALT00000019117 (HIPK3)
Ileum	ENSGALT00000103745 (ENSGALG00000053062)	ENSGALT00000098638 (ENSGALG00000054407)
Ileum	ENSGALT00000087710 (SLIRP)	ENSGALT00000017074 (ALKBH1)
Ileum	ENSGALT00000061833 (SLIRP)	ENSGALT00000017099 (SNW1)
Ileum	ENSGALT00000100411 (ENSGALG00000054207)	ENSGALT00000092410 (ENSGALG00000053258)
Ileum	ENSGALT00000097338 (ENSGALG00000053713)	ENSGALT00000019349 (SYT16)
Ileum	ENSGALT00000106224 (CTNNA3)	ENSGALT00000034096 (LRRTM3)
Ileum	ENSGALT00000018097 (MAPK8)	ENSGALT00000090817 (ENSGALG00000053112)
Ileum	ENSGALT00000012572 (POLL)	ENSGALT00000012535 (DPCD)
Ileum	ENSGALT00000089567 (PDCD4)	ENSGALT00000057879 (BBIP1)
Ileum	ENSGALT00000073063 (SLC25A12)	ENSGALT00000015508 (HAT1)
Ileum	ENSGALT00000067019 (DNPEP)	ENSGALT00000047160 (ENSGALG00000043198)
Ileum	ENSGALT00000068523 (ENSGALG00000042752)	ENSGALT00000092119 (MYLK)
Ileum	ENSGALT00000098426 (ENSGALG00000050736)	ENSGALT00000086291 (FAM102B)
Ileum	ENSGALT00000078291 (KLHL20)	ENSGALT00000085107 (CENPL)
Ileum	ENSGALT00000087428 (ANGPTL1)	ENSGALT00000006794 (RALGPS2)
Ileum	ENSGALT00000053904 (TPR)	ENSGALT00000008146 (C8H1orf27)
Ileum	ENSGALT00000033221 (FAM183A)	ENSGALT00000014724 (EBNA1BP2)
Ileum	ENSGALT00000095686 (SZT2)	ENSGALT00000016237 (MED8)
Ileum	ENSGALT00000096035 (SZT2)	ENSGALT00000016237 (MED8)
Ileum	ENSGALT00000101069 (SZT2)	ENSGALT00000016237 (MED8)
Ileum	ENSGALT00000033166 (ARMH1)	ENSGALT00000097075 (KIF2C)
Ileum	ENSGALT00000106714 (MRPL37)	ENSGALT00000017496 (ENSGALG00000010758)
Ileum	ENSGALT00000092468 (ENSGALG00000049636)	ENSGALT00000017589 (PLPP3)
Ileum	ENSGALT00000086450 (ANGPTL3)	ENSGALT00000095917 (DOCK7)
Ileum	ENSGALT00000097169 (ENSGALG00000050460)	ENSGALT00000003103 (LIMS2)
Ileum	ENSGALT00000092864 (CEP19)	ENSGALT00000090549 (NRROS)
Ileum	ENSGALT00000004364 (ATP1B3)	ENSGALT00000104323 (TFDP2)
Ileum	ENSGALT00000061761 (MCF2L2)	ENSGALT00000058942 (B3GNT5)
Ileum	ENSGALT00000084927 (ENSGALG00000044630)	ENSGALT00000092163 (ENSGALG00000051188)
Ileum	ENSGALT00000101669 (COLGALT1)	ENSGALT00000107074 (PRKCSH)
Ileum	ENSGALT00000103847 (COLGALT1)	ENSGALT00000107074 (PRKCSH)
Ileum	ENSGALT00000056156 (ENSGALG00000034584)	ENSGALT00000106921 (ENSGALG00000053757)
Ileum	ENSGALT00000039477 (IFNW1)	ENSGALT00000095477 (ENSGALG00000013809)
Ileum	ENSGALT00000101642 (IFN-A)	ENSGALT00000095477 (ENSGALG00000013809)
Ileum	ENSGALT00000092218 (IFN-A)	ENSGALT00000095477 (ENSGALG00000013809)
Ileum	ENSGALT00000100222 (ENSGALG00000054396)	ENSGALT00000095477 (ENSGALG00000013809)
Ileum	ENSGALT00000091729 (IFN-A)	ENSGALT00000095477 (ENSGALG00000013809)
Ileum	ENSGALT00000102661 (IFN-A)	ENSGALT00000095477 (ENSGALG00000013809)
Ileum	ENSGALT00000083687 (ENSGALG00000044725)	ENSGALT00000095477 (ENSGALG00000013809)
Ileum	ENSGALT00000107243 (IFN-A)	ENSGALT00000095477 (ENSGALG00000013809)
Ileum	ENSGALT00000096515 (ENSGALG00000052209)	ENSGALT00000095477 (ENSGALG00000013809)
Ileum	ENSGALT00000023817 (TRAPPC13)	ENSGALT00000023814 (TRIM23)
Ileum	ENSGALT00000046241 (ENSGALG00000028335)	ENSGALT00000091794 (PRUNE2)
Ileum	ENSGALT00000051881 (AOPEP)	ENSGALT00000107984 (ENSGALG00000052891)
Ileum	ENSGALT00000097512 (AOPEP)	ENSGALT00000107984 (ENSGALG00000052891)
Ileum	ENSGALT00000096545 (ENSGALG00000048900)	ENSGALT00000088975 (CAMK4)
Jejunum	ENSGALT00000013282 (GDI1)	ENSGALT00000096902 (TASOR2)
Jejunum	ENSGALT00000011632 (ERGIC2)	ENSGALT00000104032 (LAMB1)
Jejunum	ENSGALT00000020381 (IL2RB)	ENSGALT00000098955 (KCTD17)
Jejunum	ENSGALT00000020394 (TMPRSS6)	ENSGALT00000098955 (KCTD17)
Jejunum	ENSGALT00000020831 (ENSGALG00000012766)	ENSGALT00000080620 (CHPT1)
Jejunum	ENSGALT00000091338 (ABCC9)	ENSGALT00000092742 (ENSGALG00000053183)
Jejunum	ENSGALT00000060327 (ENSGALG00000048687)	ENSGALT00000104378 (ENSGALG00000050747)
Jejunum	ENSGALT00000094503 (CCDC91)	ENSGALT00000094854 (ENSGALG00000051865)
Jejunum	ENSGALT00000030337 (GATD3A)	ENSGALT00000101667 (ENSGALG00000052076)
Jejunum	ENSGALT00000049451 (ING1)	ENSGALT00000093925 (CARS2)
Jejunum	ENSGALT00000027298 (UGGT2)	ENSGALT00000089693 (DNAJC3)
Jejunum	ENSGALT00000099856 (MTMR10)	ENSGALT00000088600 (FAN1)
Jejunum	ENSGALT00000075864 (ITFG1)	ENSGALT00000077458 (PHKB)
Jejunum	ENSGALT00000085464 (VPS35)	ENSGALT00000063938 (ORC6)
Jejunum	ENSGALT00000006976 (VPS35)	ENSGALT00000063938 (ORC6)
Jejunum	ENSGALT00000008632 (WWOX)	ENSGALT00000104098 (ENSGALG00000050479)
Jejunum	ENSGALT00000044355 (DEF8)	ENSGALT00000101009 (DBNDD1)
Jejunum	ENSGALT00000007451 (ENSGALG00000004676)	ENSGALT00000085329 (ENSGALG00000046734)
Jejunum	ENSGALT00000081878 (SLC6A1)	ENSGALT00000104629 (ENSGALG00000052249)
Jejunum	ENSGALT00000008865 (APPL1)	ENSGALT00000008837 (HESX1)
Jejunum	ENSGALT00000010655 (MTMR14)	ENSGALT00000106180 (LHFPL4)
Jejunum	ENSGALT00000095289 (MTMR14)	ENSGALT00000106180 (LHFPL4)
Jejunum	ENSGALT00000013716 (CAND2)	ENSGALT00000047226 (SEC13)
Jejunum	ENSGALT00000005307 (ENSGALG00000003355)	ENSGALT00000005313 (ARL10)
Jejunum	ENSGALT00000089325 (THOC3)	ENSGALT00000061660 (SIMC1)
Jejunum	ENSGALT00000006272 (GEMIN5)	ENSGALT00000006244 (MRPL22)
Jejunum	ENSGALT00000090507 (VASN)	ENSGALT00000067660 (CORO7)
Jejunum	ENSGALT00000012696 (DNAJA3)	ENSGALT00000067660 (CORO7)
Jejunum	ENSGALT00000073893 (DNAJA3)	ENSGALT00000067660 (CORO7)
Jejunum	ENSGALT00000046040 (NME3)	ENSGALT00000088145 (EME2)
Jejunum	ENSGALT00000086038 (NME3)	ENSGALT00000088145 (EME2)
Jejunum	ENSGALT00000014314 (RPL12)	ENSGALT00000076180 (LRSAM1)
Jejunum	ENSGALT00000005036 (ENSGALG00000003175)	ENSGALT00000091916 (REXO4)
Jejunum	ENSGALT00000092995 (SCAI)	ENSGALT00000057772 (RPL35)
Jejunum	ENSGALT00000081425 (ADPRM)	ENSGALT00000091102 (SCO1)
Jejunum	ENSGALT00000002182 (B3GNTL1)	ENSGALT00000039250 (TBCD)
Jejunum	ENSGALT00000004723 (UTP18)	ENSGALT00000055662 (MBTD1)
Jejunum	ENSGALT00000053956 (ENSGALG00000037051)	ENSGALT00000098040 (ENSGALG00000048776)
Jejunum	ENSGALT00000049551 (ENSGALG00000037051)	ENSGALT00000098040 (ENSGALG00000048776)
Jejunum	ENSGALT00000048512 (ENSGALG00000037051)	ENSGALT00000098040 (ENSGALG00000048776)
Jejunum	ENSGALT00000050118 (EVI2A)	ENSGALT00000050895 (NF1)
Jejunum	ENSGALT00000068634 (ENSGALG00000035589)	ENSGALT00000050895 (NF1)
Jejunum	ENSGALT00000008974 (OMG)	ENSGALT00000050895 (NF1)
Jejunum	ENSGALT00000015413 (RBM48)	ENSGALT00000015424 (EFCAB1)
Jejunum	ENSGALT00000065275 (CBX3)	ENSGALT00000090968 (HNRNPA2B1)
Jejunum	ENSGALT00000078762 (CNTNAP2)	ENSGALT00000100952 (ENSGALG00000048525)
Jejunum	ENSGALT00000098666 (PIGN)	ENSGALT00000099669 (RELCH)
Jejunum	ENSGALT00000024186 (CABLES1)	ENSGALT00000097691 (TMEM241)
Jejunum	ENSGALT00000059601 (PTDSS1)	ENSGALT00000088465 (MTERF3)
Jejunum	ENSGALT00000006537 (ENSGALG00000004110)	ENSGALT00000072864 (STK4)
Jejunum	ENSGALT00000001015 (RPL22)	ENSGALT00000063844 (RNF207)
Jejunum	ENSGALT00000101019 (ENSGALG00000046740)	ENSGALT00000106289 (XPO7)
Jejunum	ENSGALT00000046784 (IKBKB)	ENSGALT00000005886 (PLAT)
Jejunum	ENSGALT00000006375 (LYPLA2)	ENSGALT00000107700 (GALE)
Jejunum	ENSGALT00000082329 (HYLS1)	ENSGALT00000088029 (RPUSD4)
Jejunum	ENSGALT00000066976 (S100A11)	ENSGALT00000069323 (COPA)
Jejunum	ENSGALT00000045737 (SNAPIN)	ENSGALT00000018872 (ILF2)
Jejunum	ENSGALT00000029552 (ENSGALG00000018702)	ENSGALT00000046820 (ENSGALG00000040336)
Jejunum	ENSGALT00000056011 (NDUFS2)	ENSGALT00000092700 (ENSGALG00000052689)
Jejunum	ENSGALT00000045280 (DCLRE1B)	ENSGALT00000071936 (ENSGALG00000053784)
Jejunum	ENSGALT00000102211 (CFD)	ENSGALT00000099690 (MED16)
Jejunum	ENSGALT00000060660 (DAZAP1)	ENSGALT00000071548 (ENSGALG00000040182)
Jejunum	ENSGALT00000014587 (EPCAM)	ENSGALT00000071878 (ENSGALG00000043013)
Jejunum	ENSGALT00000057642 (CEP68)	ENSGALT00000071042 (RAB1B)
Jejunum	ENSGALT00000076325 (ESRRG)	ENSGALT00000050657 (ENSGALG00000041996)
Jejunum	ENSGALT00000016260 (RHOQ)	ENSGALT00000067583 (PIGF)
Jejunum	ENSGALT00000076094 (AARS2)	ENSGALT00000068244 (RNF8)
Jejunum	ENSGALT00000106583 (CEP170)	ENSGALT00000017430 (ENSGALG00000010713)
Jejunum	ENSGALT00000017474 (PLD5)	ENSGALT00000097666 (ENSGALG00000054356)
Jejunum	ENSGALT00000059752 (PLD5)	ENSGALT00000097666 (ENSGALG00000054356)
Jejunum	ENSGALT00000018217 (PSMB1)	ENSGALT00000084343 (TBP)
Jejunum	ENSGALT00000024023 (CEP85L)	ENSGALT00000044362 (PLN)
Jejunum	ENSGALT00000053346 (CEP85L)	ENSGALT00000044362 (PLN)
Jejunum	ENSGALT00000101074 (ENSGALG00000053695)	ENSGALT00000072077 (KCNQ5)
Jejunum	ENSGALT00000071351 (TDRP)	ENSGALT00000026390 (FBXO25)
Jejunum	ENSGALT00000093863 (ILVBL)	ENSGALT00000102499 (ENSGALG00000052865)
Jejunum	ENSGALT00000107057 (ENSGALG00000047412)	ENSGALT00000096794 (ENSGALG00000054250)
Jejunum	ENSGALT00000083234 (ENSGALG00000044436)	ENSGALT00000098275 (ENSGALG00000044817)
Jejunum	ENSGALT00000105145 (ENSGALG00000047565)	ENSGALT00000103066 (ENSGALG00000053973)
Jejunum	ENSGALT00000080145 (NRK)	ENSGALT00000107288 (ENSGALG00000051675)
Jejunum	ENSGALT00000014591 (NRK)	ENSGALT00000107288 (ENSGALG00000051675)
Jejunum	ENSGALT00000038777 (APELA)	ENSGALT00000015511 (TMEM192)
Jejunum	ENSGALT00000070694 (HHIP)	ENSGALT00000092698 (ANAPC10)
Jejunum	ENSGALT00000016175 (HHIP)	ENSGALT00000092698 (ANAPC10)
Jejunum	ENSGALT00000087558 (MAB21L2)	ENSGALT00000016356 (LRBA)
Jejunum	ENSGALT00000107607 (SCLT1)	ENSGALT00000107525 (ENSGALG00000010108)
Jejunum	ENSGALT00000068504 (ENSGALG00000042001)	ENSGALT00000046180 (PIGY)
Jejunum	ENSGALT00000032215 (CENPU)	ENSGALT00000098402 (PRIMPOL)
Jejunum	ENSGALT00000092045 (TMEM150C)	ENSGALT00000057256 (ENOPH1)
Jejunum	ENSGALT00000038016 (HNRNPDL)	ENSGALT00000057256 (ENOPH1)
Jejunum	ENSGALT00000047514 (HNRNPDL)	ENSGALT00000057256 (ENOPH1)
Jejunum	ENSGALT00000068418 (HNRNPDL)	ENSGALT00000057256 (ENOPH1)
Jejunum	ENSGALT00000028196 (LCORL)	ENSGALT00000023302 (NCAPG)
Jejunum	ENSGALT00000090978 (ENSGALG00000051383)	ENSGALT00000023302 (NCAPG)
Jejunum	ENSGALT00000065542 (ENSGALG00000054173)	ENSGALT00000023302 (NCAPG)
Jejunum	ENSGALT00000079016 (RAD9A)	ENSGALT00000085502 (PPP1CA)
Jejunum	ENSGALT00000086995 (TMEM138)	ENSGALT00000089662 (CYB561A3)
Jejunum	ENSGALT00000006901 (IGHMBP2)	ENSGALT00000077592 (ENSGALG00000035064)
Jejunum	ENSGALT00000006309 (PRMT3)	ENSGALT00000107755 (ENSGALG00000047154)
Jejunum	ENSGALT00000065948 (ENSGALG00000030338)	ENSGALT00000011857 (CTNND1)
Jejunum	ENSGALT00000094369 (ENSGALG00000038416)	ENSGALT00000093742 (ENSGALG00000049341)
Jejunum	ENSGALT00000015203 (FAM45A)	ENSGALT00000090721 (SFXN4)
Jejunum	ENSGALT00000054973 (ALDH18A1)	ENSGALT00000103444 (ENSGALG00000051783)
Jejunum	ENSGALT00000023090 (CIR1)	ENSGALT00000067425 (SCRN3)
Jejunum	ENSGALT00000015749 (METTL5)	ENSGALT00000100882 (SSB)
Jejunum	ENSGALT00000072293 (PTPRN)	ENSGALT00000105846 (ENSGALG00000043198)
Jejunum	ENSGALT00000018510 (CNPPD1)	ENSGALT00000053169 (ENSGALG00000033452)
Jejunum	ENSGALT00000006824 (ANGPTL1)	ENSGALT00000064580 (RALGPS2)
Jejunum	ENSGALT00000009017 (F3)	ENSGALT00000057501 (SLC44A3)
Jejunum	ENSGALT00000096814 (ENSGALG00000054466)	ENSGALT00000048322 (ADGRL2)
Jejunum	ENSGALT00000014598 (USP33)	ENSGALT00000106880 (MIGA1)
Jejunum	ENSGALT00000016649 (AKR1A1)	ENSGALT00000062686 (PRDX1)
Jejunum	ENSGALT00000084097 (AKR1A1)	ENSGALT00000062686 (PRDX1)
Jejunum	ENSGALT00000086151 (AKR1A1)	ENSGALT00000062686 (PRDX1)
Jejunum	ENSGALT00000090404 (ENSGALG00000054726)	ENSGALT00000096462 (ENSGALG00000050045)
Jejunum	ENSGALT00000092795 (COLGALT1)	ENSGALT00000095841 (PRKCSH)
Jejunum	ENSGALT00000053568 (MT-CO1)	ENSGALT00000056830 (ENSGALG00000033462)
Jejunum	ENSGALT00000052116 (ENSGALG00000034584)	ENSGALT00000106921 (ENSGALG00000053757)
Jejunum	ENSGALT00000004088 (ARHGEF39)	ENSGALT00000090765 (ENSGALG00000037611)
Jejunum	ENSGALT00000029351 (GZMA)	ENSGALT00000100592 (ENSGALG00000013546)
Jejunum	ENSGALT00000071193 (SHLD3)	ENSGALT00000069401 (TRIM23)
Jejunum	ENSGALT00000023818 (TRAPPC13)	ENSGALT00000069401 (TRIM23)
Jejunum	ENSGALT00000089674 (TRAPPC13)	ENSGALT00000069401 (TRIM23)
Jejunum	ENSGALT00000028259 (ENSGALG00000017558)	ENSGALT00000104288 (ENSGALG00000029118)
Jejunum	ENSGALT00000106415 (ENSGALG00000017558)	ENSGALT00000104288 (ENSGALG00000029118)
Jejunum	ENSGALT00000013281 (ANKRD16)	ENSGALT00000092270 (FBXO18)
Jejunum	ENSGALT00000081149 (ENSGALG00000034631)	ENSGALT00000079743 (HIST1H103)
Jejunum	ENSGALT00000094022 (NME7)	ENSGALT00000036926 (ATP1B1)
Jejunum	ENSGALT00000098860 (ENSGALG00000054836)	ENSGALT00000024790 (KIAA1524)
Jejunum	ENSGALT00000095806 (ENSGALG00000047821)	ENSGALT00000024926 (ZFP92)
Jejunum	ENSGALT00000098683 (ENSGALG00000048974)	ENSGALT00000095463 (ROBO2)
Jejunum	ENSGALT00000080819 (CASK)	ENSGALT00000026167 (GPR34)
Jejunum	ENSGALT00000053149 (CASK)	ENSGALT00000026167 (GPR34)
Jejunum	ENSGALT00000104408 (CASK)	ENSGALT00000026167 (GPR34)
Jejunum	ENSGALT00000096429 (RB1)	ENSGALT00000027460 (LPAR6)
Jejunum	ENSGALT00000104547 (ENSGALG00000053592)	ENSGALT00000027571 (PDS5B)
Jejunum	ENSGALT00000100617 (ALKBH8)	ENSGALT00000027731 (ELMOD1)
Jejunum	ENSGALT00000027995 (FAM168A)	ENSGALT00000086546 (ENSGALG00000044739)
Jejunum	ENSGALT00000095325 (ENSGALG00000046718)	ENSGALT00000098387 (ENSGALG00000038550)
Jejunum	ENSGALT00000034761 (NEO1)	ENSGALT00000095654 (ENSGALG00000055009)
Jejunum	ENSGALT00000097997 (NEO1)	ENSGALT00000095654 (ENSGALG00000055009)
Jejunum	ENSGALT00000092776 (APBA2)	ENSGALT00000090859 (MPHOSPH10)
Jejunum	ENSGALT00000101967 (NUDT21)	ENSGALT00000004848 (OGFOD1)
Jejunum	ENSGALT00000028047 (C11H16ORF87)	ENSGALT00000055464 (GPT2)
Jejunum	ENSGALT00000091496 (UTP4)	ENSGALT00000058298 (CHTF8)
Jejunum	ENSGALT00000086207 (UTP4)	ENSGALT00000058298 (CHTF8)
Jejunum	ENSGALT00000001336 (ADAT1)	ENSGALT00000096189 (GABARAPL2)
Jejunum	ENSGALT00000101522 (RNF123)	ENSGALT00000105582 (AMIGO3)
Jejunum	ENSGALT00000045876 (OMD)	ENSGALT00000007467 (CENPP)
Jejunum	ENSGALT00000101309 (MGLL)	ENSGALT00000092328 (ENSGALG00000051867)
Jejunum	ENSGALT00000091818 (DALRD3)	ENSGALT00000100367 (WDR6)
Jejunum	ENSGALT00000098062 (DALRD3)	ENSGALT00000100367 (WDR6)
Jejunum	ENSGALT00000101948 (DALRD3)	ENSGALT00000100367 (WDR6)
Jejunum	ENSGALT00000072433 (DALRD3)	ENSGALT00000100367 (WDR6)
Jejunum	ENSGALT00000004056 (ENSGALG00000002570)	ENSGALT00000004047 (ARAP3)
Jejunum	ENSGALT00000082236 (HNRNPH2)	ENSGALT00000009585 (DGUOK)
Jejunum	ENSGALT00000090731 (BRI3)	ENSGALT00000108306 (TECPR1)
Jejunum	ENSGALT00000060524 (GPR146)	ENSGALT00000103266 (C7orf50)
Jejunum	ENSGALT00000071421 (GPR146)	ENSGALT00000103266 (C7orf50)
Jejunum	ENSGALT00000095347 (EPN2)	ENSGALT00000008174 (B9D1)
Jejunum	ENSGALT00000091140 (GPRC5B)	ENSGALT00000045802 (IQCK)
Jejunum	ENSGALT00000106881 (LYRM1)	ENSGALT00000080718 (DCUN1D3)
Jejunum	ENSGALT00000104055 (LYRM1)	ENSGALT00000080718 (DCUN1D3)
Jejunum	ENSGALT00000093515 (LYRM1)	ENSGALT00000080718 (DCUN1D3)
Jejunum	ENSGALT00000062710 (PI4KA)	ENSGALT00000063276 (SERPIND1)
Jejunum	ENSGALT00000057304 (PI4KA)	ENSGALT00000063276 (SERPIND1)
Jejunum	ENSGALT00000104374 (MRPL40)	ENSGALT00000077327 (HIRA)
Jejunum	ENSGALT00000091250 (ENSGALG00000047380)	ENSGALT00000046723 (ENSGALG00000049208)
Jejunum	ENSGALT00000093071 (ENSGALG00000047380)	ENSGALT00000046723 (ENSGALG00000049208)
Jejunum	ENSGALT00000093088 (ENSGALG00000047380)	ENSGALT00000046723 (ENSGALG00000049208)
Jejunum	ENSGALT00000065054 (ENSGALG00000039480)	ENSGALT00000060138 (TRIM7.2)
Jejunum	ENSGALT00000080388 (ENSGALG00000040536)	ENSGALT00000095018 (EXD3)
Jejunum	ENSGALT00000067722 (RPL12)	ENSGALT00000014334 (LRSAM1)
Jejunum	ENSGALT00000054954 (ENSGALG00000042325)	ENSGALT00000007637 (C17H9orf16)
Jejunum	ENSGALT00000051891 (RALGPS1)	ENSGALT00000001362 (ANGPTL2)
Jejunum	ENSGALT00000097803 (RALGPS1)	ENSGALT00000001362 (ANGPTL2)
Jejunum	ENSGALT00000001330 (RALGPS1)	ENSGALT00000001362 (ANGPTL2)
Jejunum	ENSGALT00000105470 (ENSGALG00000052148)	ENSGALT00000093013 (ENSGALG00000052902)
Jejunum	ENSGALT00000019296 (CANT1)	ENSGALT00000107490 (ENGASE)
Jejunum	ENSGALT00000073554 (ENSGALG00000037051)	ENSGALT00000073675 (ENSGALG00000033320)
Jejunum	ENSGALT00000080376 (ENSGALG00000037051)	ENSGALT00000073675 (ENSGALG00000033320)
Jejunum	ENSGALT00000103112 (ENSGALG00000047563)	ENSGALT00000073675 (ENSGALG00000033320)
Jejunum	ENSGALT00000097527 (ENSGALG00000001049)	ENSGALT00000107005 (MTMR4)
Jejunum	ENSGALT00000108031 (ENSGALG00000001049)	ENSGALT00000107005 (MTMR4)
Jejunum	ENSGALT00000092482 (ENSGALG00000039186)	ENSGALT00000063763 (WAC)
Jejunum	ENSGALT00000102632 (VPS50)	ENSGALT00000038130 (HEPACAM2)
Jejunum	ENSGALT00000104755 (ENSGALG00000053033)	ENSGALT00000055546 (MMP16)
Jejunum	ENSGALT00000062465 (SCX)	ENSGALT00000096985 (BOP1)
Jejunum	ENSGALT00000062246 (NFS1)	ENSGALT00000085125 (ROMO1)
Jejunum	ENSGALT00000099697 (NFS1)	ENSGALT00000085125 (ROMO1)
Jejunum	ENSGALT00000085747 (RPN2)	ENSGALT00000006098 (GHRH)
Jejunum	ENSGALT00000075646 (ENSGALG00000004110)	ENSGALT00000006521 (STK4)
Jejunum	ENSGALT00000080339 (ENSGALG00000038484)	ENSGALT00000047845 (PKIG)
Jejunum	ENSGALT00000104559 (ZMYND12)	ENSGALT00000095241 (PPCS)
Jejunum	ENSGALT00000000876 (ZCCHC17)	ENSGALT00000041219 (NWD1)
Jejunum	ENSGALT00000106377 (PAFAH2)	ENSGALT00000053717 (ENSGALG00000043829)
Jejunum	ENSGALT00000093495 (RBBP4)	ENSGALT00000097257 (ZBTB8OS)
Jejunum	ENSGALT00000101477 (NNF1)	ENSGALT00000094228 (ENSGALG00000051101)
Jejunum	ENSGALT00000094196 (ENSGALG00000052789)	ENSGALT00000094228 (ENSGALG00000051101)
Jejunum	ENSGALT00000070835 (HYLS1)	ENSGALT00000041115 (RPUSD4)
Jejunum	ENSGALT00000102697 (ENSGALG00000052849)	ENSGALT00000098340 (ENSGALG00000048712)
Jejunum	ENSGALT00000004270 (CHRNB2)	ENSGALT00000063528 (UBE2Q1)
Jejunum	ENSGALT00000099038 (ENSGALG00000048074)	ENSGALT00000095434 (ENSGALG00000053676)
Jejunum	ENSGALT00000048967 (SYPL2)	ENSGALT00000074807 (PSMA5)
Jejunum	ENSGALT00000090816 (PROK1)	ENSGALT00000000572 (LAMTOR5)
Jejunum	ENSGALT00000002093 (TRAF3IP3)	ENSGALT00000002243 (INKA2)
Jejunum	ENSGALT00000091471 (ENSGALG00000048697)	ENSGALT00000049090 (ENSGALG00000043654)
Jejunum	ENSGALT00000097275 (FKBP8)	ENSGALT00000076102 (KXD1)
Jejunum	ENSGALT00000005915 (HAUS8)	ENSGALT00000048011 (MYO9B)
Jejunum	ENSGALT00000066674 (VRK2)	ENSGALT00000067764 (FANCL)
Jejunum	ENSGALT00000087251 (ASB3)	ENSGALT00000013347 (NPHP1)
Jejunum	ENSGALT00000013911 (KLHDC3)	ENSGALT00000060209 (MEA1)
Jejunum	ENSGALT00000106491 (AIDA)	ENSGALT00000015332 (BROX)
Jejunum	ENSGALT00000029024 (gga-mir-194)	ENSGALT00000015581 (IARS2)
Jejunum	ENSGALT00000066689 (ESRRG)	ENSGALT00000093928 (ENSGALG00000041996)
Jejunum	ENSGALT00000015707 (ESRRG)	ENSGALT00000093928 (ENSGALG00000041996)
Jejunum	ENSGALT00000105346 (INTS7)	ENSGALT00000015990 (DTL)
Jejunum	ENSGALT00000016321 (RBKS)	ENSGALT00000107891 (MRPL33)
Jejunum	ENSGALT00000104183 (ENSGALG00000054532)	ENSGALT00000017157 (BIRC6)
Jejunum	ENSGALT00000097669 (ENSGALG00000051001)	ENSGALT00000025644 (CD109)
Jejunum	ENSGALT00000092669 (ENSGALG00000038666)	ENSGALT00000081607 (UBL5)
Jejunum	ENSGALT00000098366 (ENSGALG00000048625)	ENSGALT00000100976 (ENSGALG00000054294)
Jejunum	ENSGALT00000095132 (ENSGALG00000052207)	ENSGALT00000082934 (ENSGALG00000047610)
Jejunum	ENSGALT00000105340 (THAP7)	ENSGALT00000064260 (ENSGALG00000034772)
Jejunum	ENSGALT00000072897 (THAP7)	ENSGALT00000064260 (ENSGALG00000034772)
Jejunum	ENSGALT00000082408 (MARS)	ENSGALT00000050399 (ENSGALG00000031518)
Jejunum	ENSGALT00000085471 (IDS)	ENSGALT00000088976 (ENSGALG00000029286)
Jejunum	ENSGALT00000089284 (ETFDH)	ENSGALT00000096658 (C4orf46)
Jejunum	ENSGALT00000094936 (KLHL2)	ENSGALT00000028637 (7SK)
Jejunum	ENSGALT00000093713 (KLHL2)	ENSGALT00000028637 (7SK)
Jejunum	ENSGALT00000097773 (CEP44)	ENSGALT00000017505 (FBXO8)
Jejunum	ENSGALT00000071528 (WDFY3)	ENSGALT00000099081 (PPM1K)
Jejunum	ENSGALT00000043606 (ENSGALG00000029044)	ENSGALT00000019298 (FAT4)
Jejunum	ENSGALT00000054115 (MTMR7)	ENSGALT00000022194 (VPS37A)
Jejunum	ENSGALT00000025729 (LRRTM1)	ENSGALT00000025728 (CTNNA2)
Jejunum	ENSGALT00000052576 (ENSGALG00000052156)	ENSGALT00000078117 (ENSGALG00000041205)
Jejunum	ENSGALT00000084003 (NOP56)	ENSGALT00000052568 (IDH3B)
Jejunum	ENSGALT00000085262 (NOP56)	ENSGALT00000052568 (IDH3B)
Jejunum	ENSGALT00000073888 (TMEM138)	ENSGALT00000069064 (CYB561A3)
Jejunum	ENSGALT00000105660 (ELP4)	ENSGALT00000031814 (IMMP1L)
Jejunum	ENSGALT00000104114 (ELP4)	ENSGALT00000031814 (IMMP1L)
Jejunum	ENSGALT00000008490 (PPFIBP2)	ENSGALT00000047322 (CYB5R2)
Jejunum	ENSGALT00000057056 (RNF141)	ENSGALT00000009084 (AMPD3)
Jejunum	ENSGALT00000013128 (KBTBD4)	ENSGALT00000013121 (NDUFS3)
Jejunum	ENSGALT00000087710 (SLIRP)	ENSGALT00000017074 (ALKBH1)
Jejunum	ENSGALT00000089842 (ATL1)	ENSGALT00000020164 (SAV1)
Jejunum	ENSGALT00000004486 (CTNNA3)	ENSGALT00000034096 (LRRTM3)
Jejunum	ENSGALT00000082674 (RTKN2)	ENSGALT00000004693 (ZNF365)
Jejunum	ENSGALT00000089567 (PDCD4)	ENSGALT00000057879 (BBIP1)
Jejunum	ENSGALT00000090332 (PDCD4)	ENSGALT00000057879 (BBIP1)
Jejunum	ENSGALT00000073063 (SLC25A12)	ENSGALT00000015508 (HAT1)
Jejunum	ENSGALT00000067019 (DNPEP)	ENSGALT00000018446 (DES)
Jejunum	ENSGALT00000042561 (ENSGALG00000025648)	ENSGALT00000066460 (CLASP1)
Jejunum	ENSGALT00000095686 (SZT2)	ENSGALT00000016237 (MED8)
Jejunum	ENSGALT00000101069 (SZT2)	ENSGALT00000016237 (MED8)
Jejunum	ENSGALT00000106714 (MRPL37)	ENSGALT00000017496 (ENSGALG00000010758)
Jejunum	ENSGALT00000053156 (FGGY)	ENSGALT00000038039 (JUN)
Jejunum	ENSGALT00000055523 (FGGY)	ENSGALT00000038039 (JUN)
Jejunum	ENSGALT00000070898 (MAP3K13)	ENSGALT00000102718 (KY)
Jejunum	ENSGALT00000004364 (ATP1B3)	ENSGALT00000104323 (TFDP2)
Jejunum	ENSGALT00000082876 (P2RY14)	ENSGALT00000016895 (MED12L)
Jejunum	ENSGALT00000084927 (ENSGALG00000044630)	ENSGALT00000092163 (ENSGALG00000051188)
Jejunum	ENSGALT00000099888 (YF5)	ENSGALT00000092163 (ENSGALG00000051188)
Jejunum	ENSGALT00000095913 (YF5)	ENSGALT00000092163 (ENSGALG00000051188)
Jejunum	ENSGALT00000103847 (COLGALT1)	ENSGALT00000107074 (PRKCSH)
Jejunum	ENSGALT00000039477 (IFNW1)	ENSGALT00000095477 (ENSGALG00000013809)
Jejunum	ENSGALT00000101642 (IFN-A)	ENSGALT00000095477 (ENSGALG00000013809)
Jejunum	ENSGALT00000092218 (IFN-A)	ENSGALT00000095477 (ENSGALG00000013809)
Jejunum	ENSGALT00000100222 (ENSGALG00000054396)	ENSGALT00000095477 (ENSGALG00000013809)
Jejunum	ENSGALT00000091729 (IFN-A)	ENSGALT00000095477 (ENSGALG00000013809)
Jejunum	ENSGALT00000094371 (ENSGALG00000054368)	ENSGALT00000095477 (ENSGALG00000013809)
Jejunum	ENSGALT00000102661 (IFN-A)	ENSGALT00000095477 (ENSGALG00000013809)
Jejunum	ENSGALT00000083687 (ENSGALG00000044725)	ENSGALT00000095477 (ENSGALG00000013809)
Jejunum	ENSGALT00000107243 (IFN-A)	ENSGALT00000095477 (ENSGALG00000013809)
Jejunum	ENSGALT00000058851 (ENSGALG00000033669)	ENSGALT00000095477 (ENSGALG00000013809)
Jejunum	ENSGALT00000096515 (ENSGALG00000052209)	ENSGALT00000095477 (ENSGALG00000013809)
Jejunum	ENSGALT00000099239 (ENSGALG00000053207)	ENSGALT00000095477 (ENSGALG00000013809)
Jejunum	ENSGALT00000019338 (ENSGALG00000054104)	ENSGALT00000095477 (ENSGALG00000013809)
Jejunum	ENSGALT00000090892 (GZMA)	ENSGALT00000029348 (ENSGALG00000013546)
Jejunum	ENSGALT00000023817 (TRAPPC13)	ENSGALT00000023814 (TRIM23)
Jejunum	ENSGALT00000097512 (AOPEP)	ENSGALT00000107984 (ENSGALG00000052891)
Jejunum	ENSGALT00000086136 (ALDOB)	ENSGALT00000100330 (RNF20)
Jejunum	ENSGALT00000088421 (DNAJA1)	ENSGALT00000003023 (APTX)
Macrophage (lung)	ENSGALT00000013522 (FGL2)	ENSGALT00000095496 (ENSGALG00000008309)
Macrophage (lung)	ENSGALT00000018475 (SNAPC3)	ENSGALT00000054741 (TMCC3)
Macrophage (lung)	ENSGALT00000020831 (ENSGALG00000012766)	ENSGALT00000090916 (CHPT1)
Macrophage (lung)	ENSGALT00000099856 (MTMR10)	ENSGALT00000088600 (FAN1)
Macrophage (lung)	ENSGALT00000044355 (DEF8)	ENSGALT00000076178 (DBNDD1)
Macrophage (lung)	ENSGALT00000090731 (BRI3)	ENSGALT00000106627 (TECPR1)
Macrophage (lung)	ENSGALT00000102987 (COMT)	ENSGALT00000105237 (ARVCF)
Macrophage (lung)	ENSGALT00000098363 (ENSGALG00000050552)	ENSGALT00000092687 (TMEM141)
Macrophage (lung)	ENSGALT00000055124 (ENSGALG00000035977)	ENSGALT00000049691 (ZNF618)
Macrophage (lung)	ENSGALT00000039770 (SPTAN1)	ENSGALT00000075115 (WDR34)
Macrophage (lung)	ENSGALT00000005036 (ENSGALG00000003175)	ENSGALT00000091916 (REXO4)
Macrophage (lung)	ENSGALT00000043949 (ENSGALG00000028552)	ENSGALT00000099443 (DENND1A)
Macrophage (lung)	ENSGALT00000081425 (ADPRM)	ENSGALT00000091102 (SCO1)
Macrophage (lung)	ENSGALT00000053956 (ENSGALG00000037051)	ENSGALT00000101851 (ENSGALG00000054415)
Macrophage (lung)	ENSGALT00000048512 (ENSGALG00000037051)	ENSGALT00000101851 (ENSGALG00000054415)
Macrophage (lung)	ENSGALT00000080376 (ENSGALG00000037051)	ENSGALT00000101851 (ENSGALG00000054415)
Macrophage (lung)	ENSGALT00000073554 (ENSGALG00000037051)	ENSGALT00000101851 (ENSGALG00000054415)
Macrophage (lung)	ENSGALT00000105954 (ENSGALG00000053469)	ENSGALT00000088619 (PRKAG2)
Macrophage (lung)	ENSGALT00000098666 (PIGN)	ENSGALT00000099669 (RELCH)
Macrophage (lung)	ENSGALT00000096157 (ENSGALG00000049122)	ENSGALT00000078565 (SLA)
Macrophage (lung)	ENSGALT00000075646 (ENSGALG00000004110)	ENSGALT00000072864 (STK4)
Macrophage (lung)	ENSGALT00000006537 (ENSGALG00000004110)	ENSGALT00000072864 (STK4)
Macrophage (lung)	ENSGALT00000085389 (SIRPA)	ENSGALT00000097226 (gga-mir-12243)
Macrophage (lung)	ENSGALT00000096039 (ENSGALG00000042748)	ENSGALT00000103871 (ENSGALG00000047379)
Macrophage (lung)	ENSGALT00000101019 (ENSGALG00000046740)	ENSGALT00000076659 (XPO7)
Macrophage (lung)	ENSGALT00000086666 (ENSGALG00000045705)	ENSGALT00000090319 (HMBS)
Macrophage (lung)	ENSGALT00000082329 (HYLS1)	ENSGALT00000088029 (RPUSD4)
Macrophage (lung)	ENSGALT00000045737 (SNAPIN)	ENSGALT00000055413 (ILF2)
Macrophage (lung)	ENSGALT00000016035 (RD3)	ENSGALT00000075445 (ENSGALG00000042313)
Macrophage (lung)	ENSGALT00000016260 (RHOQ)	ENSGALT00000067583 (PIGF)
Macrophage (lung)	ENSGALT00000071351 (TDRP)	ENSGALT00000026390 (FBXO25)
Macrophage (lung)	ENSGALT00000070812 (C3)	ENSGALT00000095780 (EVI5L)
Macrophage (lung)	ENSGALT00000055337 (C3)	ENSGALT00000095780 (EVI5L)
Macrophage (lung)	ENSGALT00000093863 (ILVBL)	ENSGALT00000102499 (ENSGALG00000052865)
Macrophage (lung)	ENSGALT00000107057 (ENSGALG00000047412)	ENSGALT00000092104 (ENSGALG00000049292)
Macrophage (lung)	ENSGALT00000067653 (ENSGALG00000052366)	ENSGALT00000084830 (ENSGALG00000046428)
Macrophage (lung)	ENSGALT00000092954 (ENSGALG00000050209)	ENSGALT00000087503 (ENSGALG00000045206)
Macrophage (lung)	ENSGALT00000105145 (ENSGALG00000047565)	ENSGALT00000103066 (ENSGALG00000053973)
Macrophage (lung)	ENSGALT00000104766 (ENSGALG00000050628)	ENSGALT00000095924 (DACH2)
Macrophage (lung)	ENSGALT00000038777 (APELA)	ENSGALT00000015511 (TMEM192)
Macrophage (lung)	ENSGALT00000032215 (CENPU)	ENSGALT00000095844 (PRIMPOL)
Macrophage (lung)	ENSGALT00000028196 (LCORL)	ENSGALT00000023302 (NCAPG)
Macrophage (lung)	ENSGALT00000090978 (ENSGALG00000051383)	ENSGALT00000023302 (NCAPG)
Macrophage (lung)	ENSGALT00000065542 (ENSGALG00000054173)	ENSGALT00000023302 (NCAPG)
Macrophage (lung)	ENSGALT00000067449 (ENSGALG00000040291)	ENSGALT00000098749 (ENSGALG00000054913)
Macrophage (lung)	ENSGALT00000101892 (ENSGALG00000054613)	ENSGALT00000096940 (RAD51B)
Macrophage (lung)	ENSGALT00000037710 (TTLL5)	ENSGALT00000086882 (ENSGALG00000034354)
Macrophage (lung)	ENSGALT00000089352 (TTLL5)	ENSGALT00000086882 (ENSGALG00000034354)
Macrophage (lung)	ENSGALT00000068336 (JMJD1C)	ENSGALT00000043877 (ENSGALG00000027741)
Macrophage (lung)	ENSGALT00000007929 (POLR3A)	ENSGALT00000072914 (RPS24)
Macrophage (lung)	ENSGALT00000094369 (ENSGALG00000038416)	ENSGALT00000093742 (ENSGALG00000049341)
Macrophage (lung)	ENSGALT00000018510 (CNPPD1)	ENSGALT00000053169 (ENSGALG00000033452)
Macrophage (lung)	ENSGALT00000020527 (TANC1)	ENSGALT00000085100 (WDSUB1)
Macrophage (lung)	ENSGALT00000068318 (ENSGALG00000044644)	ENSGALT00000105293 (ENSGALG00000048818)
Macrophage (lung)	ENSGALT00000098758 (ENSGALG00000052504)	ENSGALT00000105293 (ENSGALG00000048818)
Macrophage (lung)	ENSGALT00000092955 (ENSGALG00000047597)	ENSGALT00000105293 (ENSGALG00000048818)
Macrophage (lung)	ENSGALT00000052116 (ENSGALG00000034584)	ENSGALT00000106921 (ENSGALG00000053757)
Macrophage (lung)	ENSGALT00000095882 (ENSGALG00000048171)	ENSGALT00000090113 (ENSGALG00000045914)
Macrophage (lung)	ENSGALT00000094322 (HSPB3)	ENSGALT00000103489 (ENSGALG00000047249)
Macrophage (lung)	ENSGALT00000071193 (SHLD3)	ENSGALT00000054079 (TRIM23)
Macrophage (lung)	ENSGALT00000023818 (TRAPPC13)	ENSGALT00000054079 (TRIM23)
Macrophage (lung)	ENSGALT00000089674 (TRAPPC13)	ENSGALT00000054079 (TRIM23)
Macrophage (lung)	ENSGALT00000038562 (F2RL2)	ENSGALT00000103925 (IQGAP2)
Macrophage (lung)	ENSGALT00000023330 (CDC37L1)	ENSGALT00000070737 (AK3)
Macrophage (lung)	ENSGALT00000028137 (OSTF1)	ENSGALT00000103203 (NMRK1)
Macrophage (lung)	ENSGALT00000102658 (ENSGALG00000048795)	ENSGALT00000058977 (H2A-VI)
Macrophage (lung)	ENSGALT00000050393 (CCDC91)	ENSGALT00000094854 (ENSGALG00000051865)
Macrophage (lung)	ENSGALT00000102122 (ENSGALG00000049696)	ENSGALT00000064042 (ENSGALG00000039529)
Macrophage (lung)	ENSGALT00000091824 (NEPRO)	ENSGALT00000085162 (TAF13)
Macrophage (lung)	ENSGALT00000094022 (NME7)	ENSGALT00000036926 (ATP1B1)
Macrophage (lung)	ENSGALT00000036897 (HHLA2)	ENSGALT00000024781 (IFT57)
Macrophage (lung)	ENSGALT00000108240 (RB1)	ENSGALT00000027460 (LPAR6)
Macrophage (lung)	ENSGALT00000085752 (RB1)	ENSGALT00000027460 (LPAR6)
Macrophage (lung)	ENSGALT00000097789 (RB1)	ENSGALT00000027460 (LPAR6)
Macrophage (lung)	ENSGALT00000096056 (ENSGALG00000053592)	ENSGALT00000027571 (PDS5B)
Macrophage (lung)	ENSGALT00000053720 (WDR61)	ENSGALT00000034639 (CRABP-I)
Macrophage (lung)	ENSGALT00000105452 (ENSGALG00000007248)	ENSGALT00000011612 (SNRPA1)
Macrophage (lung)	ENSGALT00000028047 (C11H16ORF87)	ENSGALT00000055464 (GPT2)
Macrophage (lung)	ENSGALT00000101309 (MGLL)	ENSGALT00000102363 (ENSGALG00000051433)
Macrophage (lung)	ENSGALT00000087976 (SLC25A26)	ENSGALT00000036226 (LRIG1)
Macrophage (lung)	ENSGALT00000082236 (HNRNPH2)	ENSGALT00000009585 (DGUOK)
Macrophage (lung)	ENSGALT00000071421 (GPR146)	ENSGALT00000103266 (C7orf50)
Macrophage (lung)	ENSGALT00000104055 (LYRM1)	ENSGALT00000080718 (DCUN1D3)
Macrophage (lung)	ENSGALT00000106881 (LYRM1)	ENSGALT00000080718 (DCUN1D3)
Macrophage (lung)	ENSGALT00000100299 (ENSGALG00000046685)	ENSGALT00000098431 (ENSGALG00000050166)
Macrophage (lung)	ENSGALT00000057304 (PI4KA)	ENSGALT00000063276 (SERPIND1)
Macrophage (lung)	ENSGALT00000104374 (MRPL40)	ENSGALT00000077327 (HIRA)
Macrophage (lung)	ENSGALT00000103912 (COMT)	ENSGALT00000107088 (TXNRD2)
Macrophage (lung)	ENSGALT00000093071 (ENSGALG00000047380)	ENSGALT00000046723 (ENSGALG00000049208)
Macrophage (lung)	ENSGALT00000091250 (ENSGALG00000047380)	ENSGALT00000046723 (ENSGALG00000049208)
Macrophage (lung)	ENSGALT00000065054 (ENSGALG00000039480)	ENSGALT00000060138 (TRIM7.2)
Macrophage (lung)	ENSGALT00000091355 (ENSGALG00000050552)	ENSGALT00000061328 (TMEM141)
Macrophage (lung)	ENSGALT00000067722 (RPL12)	ENSGALT00000014334 (LRSAM1)
Macrophage (lung)	ENSGALT00000071239 (MVB12B)	ENSGALT00000042544 (NRON)
Macrophage (lung)	ENSGALT00000106384 (RALGPS1)	ENSGALT00000001362 (ANGPTL2)
Macrophage (lung)	ENSGALT00000092441 (B3GNTL1)	ENSGALT00000064276 (TBCD)
Macrophage (lung)	ENSGALT00000101403 (ENSGALG00000046212)	ENSGALT00000005570 (POLG2)
Macrophage (lung)	ENSGALT00000071031 (DDX25)	ENSGALT00000073675 (ENSGALG00000033320)
Macrophage (lung)	ENSGALT00000052025 (DDX25)	ENSGALT00000073675 (ENSGALG00000033320)
Macrophage (lung)	ENSGALT00000094278 (ABCF2)	ENSGALT00000097080 (AGAP3)
Macrophage (lung)	ENSGALT00000091571 (ENSGALG00000050129)	ENSGALT00000096484 (ENSGALG00000048976)
Macrophage (lung)	ENSGALT00000092482 (ENSGALG00000039186)	ENSGALT00000063763 (WAC)
Macrophage (lung)	ENSGALT00000091374 (OSER1)	ENSGALT00000099986 (ENSGALG00000054208)
Macrophage (lung)	ENSGALT00000071498 (OGDH)	ENSGALT00000093024 (ENSGALG00000047157)
Macrophage (lung)	ENSGALT00000102456 (ENSGALG00000052833)	ENSGALT00000040801 (PDZD3)
Macrophage (lung)	ENSGALT00000102697 (ENSGALG00000052849)	ENSGALT00000098340 (ENSGALG00000048712)
Macrophage (lung)	ENSGALT00000097363 (ENSGALG00000048707)	ENSGALT00000101737 (ENSGALG00000049516)
Macrophage (lung)	ENSGALT00000048967 (SYPL2)	ENSGALT00000074807 (PSMA5)
Macrophage (lung)	ENSGALT00000102396 (RASSF5)	ENSGALT00000001255 (EIF2D)
Macrophage (lung)	ENSGALT00000099971 (ENSGALG00000051653)	ENSGALT00000101361 (ENSGALG00000052699)
Macrophage (lung)	ENSGALT00000013911 (KLHDC3)	ENSGALT00000060209 (MEA1)
Macrophage (lung)	ENSGALT00000106491 (AIDA)	ENSGALT00000015332 (BROX)
Macrophage (lung)	ENSGALT00000016321 (RBKS)	ENSGALT00000107891 (MRPL33)
Macrophage (lung)	ENSGALT00000104183 (ENSGALG00000054532)	ENSGALT00000017157 (BIRC6)
Macrophage (lung)	ENSGALT00000095132 (ENSGALG00000052207)	ENSGALT00000082934 (ENSGALG00000047610)
Macrophage (lung)	ENSGALT00000107709 (ENSGALG00000050010)	ENSGALT00000107952 (PDE1B)
Macrophage (lung)	ENSGALT00000093713 (KLHL2)	ENSGALT00000028637 (7SK)
Macrophage (lung)	ENSGALT00000071528 (WDFY3)	ENSGALT00000018386 (PPM1K)
Macrophage (lung)	ENSGALT00000097465 (ENSGALG00000054285)	ENSGALT00000074541 (SLIT2)
Macrophage (lung)	ENSGALT00000025729 (LRRTM1)	ENSGALT00000025728 (CTNNA2)
Macrophage (lung)	ENSGALT00000082932 (NOP56)	ENSGALT00000052568 (IDH3B)
Macrophage (lung)	ENSGALT00000085262 (NOP56)	ENSGALT00000052568 (IDH3B)
Macrophage (lung)	ENSGALT00000084003 (NOP56)	ENSGALT00000052568 (IDH3B)
Macrophage (lung)	ENSGALT00000105660 (ELP4)	ENSGALT00000031814 (IMMP1L)
Macrophage (lung)	ENSGALT00000019813 (ELP4)	ENSGALT00000031814 (IMMP1L)
Macrophage (lung)	ENSGALT00000079859 (H-RAS)	ENSGALT00000106731 (ENSGALG00000047791)
Macrophage (lung)	ENSGALT00000087710 (SLIRP)	ENSGALT00000017074 (ALKBH1)
Macrophage (lung)	ENSGALT00000097338 (ENSGALG00000053713)	ENSGALT00000019349 (SYT16)
Macrophage (lung)	ENSGALT00000020371 (SOUL)	ENSGALT00000057113 (FANCM)
Macrophage (lung)	ENSGALT00000064061 (ENSGALG00000040055)	ENSGALT00000071346 (ENSGALG00000043130)
Macrophage (lung)	ENSGALT00000100899 (ENSGALG00000048276)	ENSGALT00000007651 (H2AFY2)
Macrophage (lung)	ENSGALT00000012572 (POLL)	ENSGALT00000012535 (DPCD)
Macrophage (lung)	ENSGALT00000091708 (POLL)	ENSGALT00000012535 (DPCD)
Macrophage (lung)	ENSGALT00000067019 (DNPEP)	ENSGALT00000018446 (DES)
Macrophage (lung)	ENSGALT00000098426 (ENSGALG00000050736)	ENSGALT00000086291 (FAM102B)
Macrophage (lung)	ENSGALT00000078291 (KLHL20)	ENSGALT00000085107 (CENPL)
Macrophage (lung)	ENSGALT00000084526 (AKR1A1)	ENSGALT00000062686 (PRDX1)
Macrophage (lung)	ENSGALT00000004364 (ATP1B3)	ENSGALT00000105033 (TFDP2)
Macrophage (lung)	ENSGALT00000093618 (ENSGALG00000046865)	ENSGALT00000101722 (ENSGALG00000048491)
Macrophage (lung)	ENSGALT00000103847 (COLGALT1)	ENSGALT00000107074 (PRKCSH)
Macrophage (lung)	ENSGALT00000100222 (ENSGALG00000054396)	ENSGALT00000095477 (ENSGALG00000013809)
Macrophage (lung)	ENSGALT00000094371 (ENSGALG00000054368)	ENSGALT00000095477 (ENSGALG00000013809)
Macrophage (lung)	ENSGALT00000096515 (ENSGALG00000052209)	ENSGALT00000095477 (ENSGALG00000013809)
Macrophage (lung)	ENSGALT00000099239 (ENSGALG00000053207)	ENSGALT00000095477 (ENSGALG00000013809)
Macrophage (lung)	ENSGALT00000097084 (ENSGALG00000047915)	ENSGALT00000107627 (ENSGALG00000050110)
Monocyte (blood)	ENSGALT00000105029 (CLC2DL3)	ENSGALT00000099458 (ENSGALG00000050833)
Monocyte (blood)	ENSGALT00000105029 (CLC2DL3)	ENSGALT00000104150 (ENSGALG00000048857)
Monocyte (blood)	ENSGALT00000013282 (GDI1)	ENSGALT00000096214 (TASOR2)
Monocyte (blood)	ENSGALT00000013522 (FGL2)	ENSGALT00000095496 (ENSGALG00000008309)
Monocyte (blood)	ENSGALT00000013515 (FAM185A)	ENSGALT00000095496 (ENSGALG00000008309)
Monocyte (blood)	ENSGALT00000013186 (RINT1)	ENSGALT00000104579 (EFCAB10)
Monocyte (blood)	ENSGALT00000038864 (IMMP2L)	ENSGALT00000015449 (LRRN3)
Monocyte (blood)	ENSGALT00000092973 (SLC16A7)	ENSGALT00000100261 (ENSGALG00000049770)
Monocyte (blood)	ENSGALT00000096578 (ENSGALG00000047725)	ENSGALT00000105524 (ITPR2)
Monocyte (blood)	ENSGALT00000060327 (ENSGALG00000048687)	ENSGALT00000104378 (ENSGALG00000050747)
Monocyte (blood)	ENSGALT00000094503 (CCDC91)	ENSGALT00000094854 (ENSGALG00000051865)
Monocyte (blood)	ENSGALT00000060423 (NAA50)	ENSGALT00000093236 (ATP6V1A)
Monocyte (blood)	ENSGALT00000030337 (GATD3A)	ENSGALT00000101667 (ENSGALG00000052076)
Monocyte (blood)	ENSGALT00000027350 (GATD3AL1)	ENSGALT00000100502 (ACOD1)
Monocyte (blood)	ENSGALT00000082158 (GATD3AL1)	ENSGALT00000100502 (ACOD1)
Monocyte (blood)	ENSGALT00000027426 (GTF2F2)	ENSGALT00000027428 (KCTD4)
Monocyte (blood)	ENSGALT00000027510 (VPS36)	ENSGALT00000027509 (CKAP2)
Monocyte (blood)	ENSGALT00000036465 (SUPT20H)	ENSGALT00000106619 (EXOSC8)
Monocyte (blood)	ENSGALT00000104085 (PARP6)	ENSGALT00000048878 (ENSGALG00000031313)
Monocyte (blood)	ENSGALT00000010674 (KIF7)	ENSGALT00000105641 (ENSGALG00000049602)
Monocyte (blood)	ENSGALT00000105452 (ENSGALG00000007248)	ENSGALT00000043680 (SELENOS)
Monocyte (blood)	ENSGALT00000074963 (SMAD3)	ENSGALT00000012808 (AAGAB)
Monocyte (blood)	ENSGALT00000075864 (ITFG1)	ENSGALT00000077458 (PHKB)
Monocyte (blood)	ENSGALT00000085464 (VPS35)	ENSGALT00000063938 (ORC6)
Monocyte (blood)	ENSGALT00000006976 (VPS35)	ENSGALT00000063938 (ORC6)
Monocyte (blood)	ENSGALT00000008632 (WWOX)	ENSGALT00000104098 (ENSGALG00000050479)
Monocyte (blood)	ENSGALT00000044355 (DEF8)	ENSGALT00000076178 (DBNDD1)
Monocyte (blood)	ENSGALT00000000745 (GAS8)	ENSGALT00000101925 (URAH)
Monocyte (blood)	ENSGALT00000000910 (UTP4)	ENSGALT00000058298 (CHTF8)
Monocyte (blood)	ENSGALT00000090346 (TMEM231)	ENSGALT00000005083 (GABARAPL2)
Monocyte (blood)	ENSGALT00000003917 (RNF123)	ENSGALT00000105582 (AMIGO3)
Monocyte (blood)	ENSGALT00000010655 (MTMR14)	ENSGALT00000106180 (LHFPL4)
Monocyte (blood)	ENSGALT00000095289 (MTMR14)	ENSGALT00000106180 (LHFPL4)
Monocyte (blood)	ENSGALT00000090880 (RELL2)	ENSGALT00000102840 (FCHSD1)
Monocyte (blood)	ENSGALT00000089325 (THOC3)	ENSGALT00000061660 (SIMC1)
Monocyte (blood)	ENSGALT00000006272 (GEMIN5)	ENSGALT00000006244 (MRPL22)
Monocyte (blood)	ENSGALT00000006456 (GPR146)	ENSGALT00000103266 (C7orf50)
Monocyte (blood)	ENSGALT00000092653 (GPR146)	ENSGALT00000103266 (C7orf50)
Monocyte (blood)	ENSGALT00000102216 (ENSGALG00000050332)	ENSGALT00000103266 (C7orf50)
Monocyte (blood)	ENSGALT00000012696 (DNAJA3)	ENSGALT00000067660 (CORO7)
Monocyte (blood)	ENSGALT00000073893 (DNAJA3)	ENSGALT00000067660 (CORO7)
Monocyte (blood)	ENSGALT00000015164 (IFT140)	ENSGALT00000096436 (TMEM204)
Monocyte (blood)	ENSGALT00000098425 (COMT)	ENSGALT00000003095 (TXNRD2)
Monocyte (blood)	ENSGALT00000102987 (COMT)	ENSGALT00000003095 (TXNRD2)
Monocyte (blood)	ENSGALT00000097213 (ENSGALG00000048880)	ENSGALT00000046723 (ENSGALG00000049208)
Monocyte (blood)	ENSGALT00000098363 (ENSGALG00000050552)	ENSGALT00000073089 (CLIC3)
Monocyte (blood)	ENSGALT00000067722 (RPL12)	ENSGALT00000065208 (ENSGALG00000037079)
Monocyte (blood)	ENSGALT00000039770 (SPTAN1)	ENSGALT00000075115 (WDR34)
Monocyte (blood)	ENSGALT00000089974 (NTMT1)	ENSGALT00000006983 (ASB6)
Monocyte (blood)	ENSGALT00000087149 (TOR1B)	ENSGALT00000099546 (PTGES)
Monocyte (blood)	ENSGALT00000005036 (ENSGALG00000003175)	ENSGALT00000091916 (REXO4)
Monocyte (blood)	ENSGALT00000001402 (MVB12B)	ENSGALT00000042544 (NRON)
Monocyte (blood)	ENSGALT00000002182 (B3GNTL1)	ENSGALT00000039250 (TBCD)
Monocyte (blood)	ENSGALT00000003814 (RECQL5)	ENSGALT00000003817 (SMIM5)
Monocyte (blood)	ENSGALT00000004723 (UTP18)	ENSGALT00000055662 (MBTD1)
Monocyte (blood)	ENSGALT00000012930 (ARMC7)	ENSGALT00000066580 (HN1)
Monocyte (blood)	ENSGALT00000083321 (ENSGALG00000052672)	ENSGALT00000083724 (ENSGALG00000033320)
Monocyte (blood)	ENSGALT00000053956 (ENSGALG00000037051)	ENSGALT00000083724 (ENSGALG00000033320)
Monocyte (blood)	ENSGALT00000049551 (ENSGALG00000037051)	ENSGALT00000083724 (ENSGALG00000033320)
Monocyte (blood)	ENSGALT00000080376 (ENSGALG00000037051)	ENSGALT00000083724 (ENSGALG00000033320)
Monocyte (blood)	ENSGALT00000088357 (TMEM120A)	ENSGALT00000003192 (POR)
Monocyte (blood)	ENSGALT00000008627 (ZNHIT3)	ENSGALT00000039165 (MYO19)
Monocyte (blood)	ENSGALT00000050118 (EVI2A)	ENSGALT00000061978 (NF1)
Monocyte (blood)	ENSGALT00000068634 (ENSGALG00000035589)	ENSGALT00000061978 (NF1)
Monocyte (blood)	ENSGALT00000008974 (OMG)	ENSGALT00000061978 (NF1)
Monocyte (blood)	ENSGALT00000008701 (JMJD4)	ENSGALT00000103352 (SNAP47)
Monocyte (blood)	ENSGALT00000105954 (ENSGALG00000053469)	ENSGALT00000038780 (PRKAG2)
Monocyte (blood)	ENSGALT00000017640 (ENSGALG00000010854)	ENSGALT00000108143 (ENSGALG00000049403)
Monocyte (blood)	ENSGALT00000065275 (CBX3)	ENSGALT00000090968 (HNRNPA2B1)
Monocyte (blood)	ENSGALT00000070014 (CX3CR1)	ENSGALT00000097414 (ENSGALG00000053738)
Monocyte (blood)	ENSGALT00000045583 (ENSGALG00000054420)	ENSGALT00000077586 (BPHL)
Monocyte (blood)	ENSGALT00000096386 (ANKH)	ENSGALT00000093530 (ENSGALG00000049228)
Monocyte (blood)	ENSGALT00000024186 (CABLES1)	ENSGALT00000097691 (TMEM241)
Monocyte (blood)	ENSGALT00000046248 (TERF1)	ENSGALT00000047667 (SBSPON)
Monocyte (blood)	ENSGALT00000059601 (PTDSS1)	ENSGALT00000088465 (MTERF3)
Monocyte (blood)	ENSGALT00000096157 (ENSGALG00000049122)	ENSGALT00000078565 (SLA)
Monocyte (blood)	ENSGALT00000004812 (PXMP4)	ENSGALT00000056181 (ZNF341)
Monocyte (blood)	ENSGALT00000006537 (ENSGALG00000004110)	ENSGALT00000072864 (STK4)
Monocyte (blood)	ENSGALT00000085389 (SIRPA)	ENSGALT00000097226 (gga-mir-12243)
Monocyte (blood)	ENSGALT00000012067 (CTSZ)	ENSGALT00000043458 (gga-mir-6597)
Monocyte (blood)	ENSGALT00000073180 (CTSZ)	ENSGALT00000095073 (GNAS)
Monocyte (blood)	ENSGALT00000001015 (RPL22)	ENSGALT00000063844 (RNF207)
Monocyte (blood)	ENSGALT00000039633 (UBXN10)	ENSGALT00000022927 (PLA2G5)
Monocyte (blood)	ENSGALT00000101019 (ENSGALG00000046740)	ENSGALT00000076659 (XPO7)
Monocyte (blood)	ENSGALT00000005118 (ASH2L)	ENSGALT00000005128 (STAR)
Monocyte (blood)	ENSGALT00000022512 (SNRNP27)	ENSGALT00000098443 (HK2)
Monocyte (blood)	ENSGALT00000022511 (MXD1)	ENSGALT00000098443 (HK2)
Monocyte (blood)	ENSGALT00000000949 (SCMH1)	ENSGALT00000083144 (CTPS1)
Monocyte (blood)	ENSGALT00000003067 (GNL2)	ENSGALT00000003106 (ENSGALG00000001996)
Monocyte (blood)	ENSGALT00000005575 (RBBP4)	ENSGALT00000097257 (ZBTB8OS)
Monocyte (blood)	ENSGALT00000090762 (AZIN2)	ENSGALT00000095197 (AK2)
Monocyte (blood)	ENSGALT00000006375 (LYPLA2)	ENSGALT00000107700 (GALE)
Monocyte (blood)	ENSGALT00000056013 (DPAGT1)	ENSGALT00000076907 (C2CD2L)
Monocyte (blood)	ENSGALT00000086666 (ENSGALG00000045705)	ENSGALT00000090319 (HMBS)
Monocyte (blood)	ENSGALT00000082329 (HYLS1)	ENSGALT00000088029 (RPUSD4)
Monocyte (blood)	ENSGALT00000046476 (TIRAP)	ENSGALT00000061538 (FAM118B)
Monocyte (blood)	ENSGALT00000078850 (TIRAP)	ENSGALT00000061538 (FAM118B)
Monocyte (blood)	ENSGALT00000066976 (S100A11)	ENSGALT00000069323 (COPA)
Monocyte (blood)	ENSGALT00000045737 (SNAPIN)	ENSGALT00000055413 (ILF2)
Monocyte (blood)	ENSGALT00000045280 (DCLRE1B)	ENSGALT00000071936 (ENSGALG00000053784)
Monocyte (blood)	ENSGALT00000087884 (ENSGALG00000045738)	ENSGALT00000094502 (PCGF2)
Monocyte (blood)	ENSGALT00000060660 (DAZAP1)	ENSGALT00000071548 (ENSGALG00000040182)
Monocyte (blood)	ENSGALT00000014390 (MDH1)	ENSGALT00000014402 (WDPCP)
Monocyte (blood)	ENSGALT00000015469 (RAB3GAP2)	ENSGALT00000096327 (IARS2)
Monocyte (blood)	ENSGALT00000016247 (PRKCE)	ENSGALT00000105633 (ENSGALG00000047946)
Monocyte (blood)	ENSGALT00000016260 (RHOQ)	ENSGALT00000031915 (PIGF)
Monocyte (blood)	ENSGALT00000076094 (AARS2)	ENSGALT00000068244 (RNF8)
Monocyte (blood)	ENSGALT00000106583 (CEP170)	ENSGALT00000017430 (ENSGALG00000010713)
Monocyte (blood)	ENSGALT00000084942 (CEP170)	ENSGALT00000017430 (ENSGALG00000010713)
Monocyte (blood)	ENSGALT00000070812 (C3)	ENSGALT00000095780 (EVI5L)
Monocyte (blood)	ENSGALT00000055337 (C3)	ENSGALT00000095780 (EVI5L)
Monocyte (blood)	ENSGALT00000057396 (TGFB1)	ENSGALT00000066625 (ENSGALG00000040044)
Monocyte (blood)	ENSGALT00000014910 (IDS)	ENSGALT00000088976 (ENSGALG00000029286)
Monocyte (blood)	ENSGALT00000015372 (ETFDH)	ENSGALT00000096658 (C4orf46)
Monocyte (blood)	ENSGALT00000078753 (KLHL2)	ENSGALT00000028637 (7SK)
Monocyte (blood)	ENSGALT00000067980 (KLHL2)	ENSGALT00000028637 (7SK)
Monocyte (blood)	ENSGALT00000067326 (GTF2E2)	ENSGALT00000093271 (SMIM18)
Monocyte (blood)	ENSGALT00000016727 (GTF2E2)	ENSGALT00000093271 (SMIM18)
Monocyte (blood)	ENSGALT00000017222 (PPA2)	ENSGALT00000097030 (ENSGALG00000053686)
Monocyte (blood)	ENSGALT00000032215 (CENPU)	ENSGALT00000095844 (PRIMPOL)
Monocyte (blood)	ENSGALT00000092045 (TMEM150C)	ENSGALT00000057256 (ENOPH1)
Monocyte (blood)	ENSGALT00000038016 (HNRNPDL)	ENSGALT00000057256 (ENOPH1)
Monocyte (blood)	ENSGALT00000047514 (HNRNPDL)	ENSGALT00000057256 (ENOPH1)
Monocyte (blood)	ENSGALT00000068418 (HNRNPDL)	ENSGALT00000057256 (ENOPH1)
Monocyte (blood)	ENSGALT00000099383 (NUDT6)	ENSGALT00000019309 (SPATA5)
Monocyte (blood)	ENSGALT00000067449 (ENSGALG00000040291)	ENSGALT00000098749 (ENSGALG00000054913)
Monocyte (blood)	ENSGALT00000079016 (RAD9A)	ENSGALT00000085502 (PPP1CA)
Monocyte (blood)	ENSGALT00000086995 (TMEM138)	ENSGALT00000089662 (CYB561A3)
Monocyte (blood)	ENSGALT00000006309 (PRMT3)	ENSGALT00000107755 (ENSGALG00000047154)
Monocyte (blood)	ENSGALT00000012899 (C5H11orf74)	ENSGALT00000086146 (RAG2)
Monocyte (blood)	ENSGALT00000045646 (CHAC1)	ENSGALT00000107557 (INO80)
Monocyte (blood)	ENSGALT00000037710 (TTLL5)	ENSGALT00000086882 (ENSGALG00000034354)
Monocyte (blood)	ENSGALT00000089352 (TTLL5)	ENSGALT00000086882 (ENSGALG00000034354)
Monocyte (blood)	ENSGALT00000097709 (GPR65)	ENSGALT00000103812 (GALC)
Monocyte (blood)	ENSGALT00000017244 (GPR65)	ENSGALT00000103812 (GALC)
Monocyte (blood)	ENSGALT00000094557 (TDP1)	ENSGALT00000032540 (EFCAB11)
Monocyte (blood)	ENSGALT00000068336 (JMJD1C)	ENSGALT00000043877 (ENSGALG00000027741)
Monocyte (blood)	ENSGALT00000007929 (POLR3A)	ENSGALT00000007776 (RPS24)
Monocyte (blood)	ENSGALT00000015203 (FAM45A)	ENSGALT00000090721 (SFXN4)
Monocyte (blood)	ENSGALT00000054973 (ALDH18A1)	ENSGALT00000103444 (ENSGALG00000051783)
Monocyte (blood)	ENSGALT00000023090 (CIR1)	ENSGALT00000067425 (SCRN3)
Monocyte (blood)	ENSGALT00000015749 (METTL5)	ENSGALT00000100882 (SSB)
Monocyte (blood)	ENSGALT00000018146 (RBMS1)	ENSGALT00000090642 (ENSGALG00000049994)
Monocyte (blood)	ENSGALT00000099470 (RBMS1)	ENSGALT00000090642 (ENSGALG00000049994)
Monocyte (blood)	ENSGALT00000018510 (CNPPD1)	ENSGALT00000053169 (ENSGALG00000033452)
Monocyte (blood)	ENSGALT00000042561 (ENSGALG00000025648)	ENSGALT00000019030 (CLASP1)
Monocyte (blood)	ENSGALT00000083500 (PARP9)	ENSGALT00000019737 (FAIM)
Monocyte (blood)	ENSGALT00000090492 (PARP9)	ENSGALT00000019737 (FAIM)
Monocyte (blood)	ENSGALT00000080901 (ATF6)	ENSGALT00000090452 (ENSGALG00000054206)
Monocyte (blood)	ENSGALT00000073451 (SELENOF)	ENSGALT00000103978 (ENSGALG00000047408)
Monocyte (blood)	ENSGALT00000016649 (AKR1A1)	ENSGALT00000062686 (PRDX1)
Monocyte (blood)	ENSGALT00000084097 (AKR1A1)	ENSGALT00000062686 (PRDX1)
Monocyte (blood)	ENSGALT00000086151 (AKR1A1)	ENSGALT00000062686 (PRDX1)
Monocyte (blood)	ENSGALT00000063906 (GIGYF2)	ENSGALT00000002259 (KCNJ13)
Monocyte (blood)	ENSGALT00000087232 (ENSGALG00000046502)	ENSGALT00000105293 (ENSGALG00000048818)
Monocyte (blood)	ENSGALT00000084671 (ENSGALG00000046502)	ENSGALT00000105293 (ENSGALG00000048818)
Monocyte (blood)	ENSGALT00000098758 (ENSGALG00000052504)	ENSGALT00000105293 (ENSGALG00000048818)
Monocyte (blood)	ENSGALT00000056025 (ENSGALG00000030707)	ENSGALT00000101672 (ENSGALG00000047682)
Monocyte (blood)	ENSGALT00000077692 (SPIN1W)	ENSGALT00000092327 (ENSGALG00000053933)
Monocyte (blood)	ENSGALT00000052745 (ENSGALG00000035780)	ENSGALT00000099413 (ENSGALG00000049534)
Monocyte (blood)	ENSGALT00000052116 (ENSGALG00000034584)	ENSGALT00000106921 (ENSGALG00000053757)
Monocyte (blood)	ENSGALT00000003796 (GBA2)	ENSGALT00000088738 (RGP1)
Monocyte (blood)	ENSGALT00000004088 (ARHGEF39)	ENSGALT00000090765 (ENSGALG00000037611)
Monocyte (blood)	ENSGALT00000071193 (SHLD3)	ENSGALT00000069401 (TRIM23)
Monocyte (blood)	ENSGALT00000023818 (TRAPPC13)	ENSGALT00000069401 (TRIM23)
Monocyte (blood)	ENSGALT00000023330 (CDC37L1)	ENSGALT00000070737 (AK3)
Monocyte (blood)	ENSGALT00000028137 (OSTF1)	ENSGALT00000032816 (NMRK1)
Monocyte (blood)	ENSGALT00000023641 (TTC37)	ENSGALT00000063159 (ARSK)
Monocyte (blood)	ENSGALT00000028259 (ENSGALG00000017558)	ENSGALT00000104288 (ENSGALG00000029118)
Monocyte (blood)	ENSGALT00000090989 (CLC2DL3)	ENSGALT00000091667 (ENSGALG00000053510)
Monocyte (blood)	ENSGALT00000013281 (ANKRD16)	ENSGALT00000092270 (FBXO18)
Monocyte (blood)	ENSGALT00000097398 (ENSGALG00000053060)	ENSGALT00000093654 (TASOR2)
Monocyte (blood)	ENSGALT00000020831 (ENSGALG00000012766)	ENSGALT00000090916 (CHPT1)
Monocyte (blood)	ENSGALT00000094657 (ENSGALG00000053936)	ENSGALT00000021284 (BID)
Monocyte (blood)	ENSGALT00000097703 (LRMP)	ENSGALT00000022723 (CASC1)
Monocyte (blood)	ENSGALT00000092764 (PNPLA3)	ENSGALT00000022945 (SULT4A1)
Monocyte (blood)	ENSGALT00000099773 (ENSGALG00000052513)	ENSGALT00000023174 (TSPAN9)
Monocyte (blood)	ENSGALT00000081603 (ENSGALG00000040898)	ENSGALT00000102923 (ENSGALG00000050907)
Monocyte (blood)	ENSGALT00000100404 (ENSGALG00000049912)	ENSGALT00000094338 (ENSGALG00000052801)
Monocyte (blood)	ENSGALT00000098920 (ENSGALG00000049912)	ENSGALT00000094338 (ENSGALG00000052801)
Monocyte (blood)	ENSGALT00000024500 (NEPRO)	ENSGALT00000085162 (TAF13)
Monocyte (blood)	ENSGALT00000091824 (NEPRO)	ENSGALT00000085162 (TAF13)
Monocyte (blood)	ENSGALT00000082160 (NME7)	ENSGALT00000036926 (ATP1B1)
Monocyte (blood)	ENSGALT00000094022 (NME7)	ENSGALT00000036926 (ATP1B1)
Monocyte (blood)	ENSGALT00000024648 (ENSGALG00000015271)	ENSGALT00000100753 (CMSS1)
Monocyte (blood)	ENSGALT00000094520 (HHLA2)	ENSGALT00000024781 (IFT57)
Monocyte (blood)	ENSGALT00000036897 (HHLA2)	ENSGALT00000024781 (IFT57)
Monocyte (blood)	ENSGALT00000095806 (ENSGALG00000047821)	ENSGALT00000024926 (ZFP92)
Monocyte (blood)	ENSGALT00000105738 (CD80)	ENSGALT00000041393 (TIMMDC1)
Monocyte (blood)	ENSGALT00000068147 (JAM2)	ENSGALT00000063486 (ATP5PF)
Monocyte (blood)	ENSGALT00000104408 (CASK)	ENSGALT00000026167 (GPR34)
Monocyte (blood)	ENSGALT00000030243 (ENSGALG00000016760)	ENSGALT00000027060 (MITD1)
Monocyte (blood)	ENSGALT00000027298 (UGGT2)	ENSGALT00000089693 (DNAJC3)
Monocyte (blood)	ENSGALT00000107323 (RB1)	ENSGALT00000027460 (LPAR6)
Monocyte (blood)	ENSGALT00000104547 (ENSGALG00000053592)	ENSGALT00000079258 (PDS5B)
Monocyte (blood)	ENSGALT00000096056 (ENSGALG00000053592)	ENSGALT00000079258 (PDS5B)
Monocyte (blood)	ENSGALT00000091286 (MTIF3)	ENSGALT00000027621 (GTF3A)
Monocyte (blood)	ENSGALT00000099250 (ENSGALG00000017220)	ENSGALT00000060059 (ENSGALG00000040433)
Monocyte (blood)	ENSGALT00000101883 (ENSGALG00000017220)	ENSGALT00000060059 (ENSGALG00000040433)
Monocyte (blood)	ENSGALT00000028519 (ENSGALG00000017812)	ENSGALT00000060059 (ENSGALG00000040433)
Monocyte (blood)	ENSGALT00000028521 (ENSGALG00000017814)	ENSGALT00000060059 (ENSGALG00000040433)
Monocyte (blood)	ENSGALT00000028522 (ENSGALG00000017815)	ENSGALT00000060059 (ENSGALG00000040433)
Monocyte (blood)	ENSGALT00000042593 (ENSGALG00000025680)	ENSGALT00000060059 (ENSGALG00000040433)
Monocyte (blood)	ENSGALT00000027995 (FAM168A)	ENSGALT00000086546 (ENSGALG00000044739)
Monocyte (blood)	ENSGALT00000082543 (ENSGALG00000033780)	ENSGALT00000058852 (ITGB1BP3)
Monocyte (blood)	ENSGALT00000051937 (ENSGALG00000033780)	ENSGALT00000058852 (ITGB1BP3)
Monocyte (blood)	ENSGALT00000097973 (ENSGALG00000033780)	ENSGALT00000058852 (ITGB1BP3)
Monocyte (blood)	ENSGALT00000090795 (ENSGALG00000047540)	ENSGALT00000105914 (ENSGALG00000051766)
Monocyte (blood)	ENSGALT00000101967 (NUDT21)	ENSGALT00000004848 (OGFOD1)
Monocyte (blood)	ENSGALT00000028047 (C11H16ORF87)	ENSGALT00000055464 (GPT2)
Monocyte (blood)	ENSGALT00000051074 (CEBPG)	ENSGALT00000007832 (PEPD)
Monocyte (blood)	ENSGALT00000001336 (ADAT1)	ENSGALT00000096189 (GABARAPL2)
Monocyte (blood)	ENSGALT00000096926 (RNF123)	ENSGALT00000003943 (GMPPB)
Monocyte (blood)	ENSGALT00000101522 (RNF123)	ENSGALT00000003943 (GMPPB)
Monocyte (blood)	ENSGALT00000047782 (TSEN2)	ENSGALT00000043832 (MKRN2OS)
Monocyte (blood)	ENSGALT00000107244 (TSEN2)	ENSGALT00000043832 (MKRN2OS)
Monocyte (blood)	ENSGALT00000011252 (ENSGALG00000006944)	ENSGALT00000011237 (P4HTM)
Monocyte (blood)	ENSGALT00000082236 (HNRNPH2)	ENSGALT00000009585 (DGUOK)
Monocyte (blood)	ENSGALT00000090731 (BRI3)	ENSGALT00000108306 (TECPR1)
Monocyte (blood)	ENSGALT00000071421 (GPR146)	ENSGALT00000105461 (C7orf50)
Monocyte (blood)	ENSGALT00000006465 (GPER1)	ENSGALT00000105461 (C7orf50)
Monocyte (blood)	ENSGALT00000095347 (EPN2)	ENSGALT00000008174 (B9D1)
Monocyte (blood)	ENSGALT00000009864 (PLK1)	ENSGALT00000043152 (ERN2)
Monocyte (blood)	ENSGALT00000105945 (GNPTG)	ENSGALT00000010385 (TSR3)
Monocyte (blood)	ENSGALT00000090507 (VASN)	ENSGALT00000080412 (CORO7)
Monocyte (blood)	ENSGALT00000091140 (GPRC5B)	ENSGALT00000045802 (IQCK)
Monocyte (blood)	ENSGALT00000104055 (LYRM1)	ENSGALT00000080718 (DCUN1D3)
Monocyte (blood)	ENSGALT00000093515 (LYRM1)	ENSGALT00000080718 (DCUN1D3)
Monocyte (blood)	ENSGALT00000106881 (LYRM1)	ENSGALT00000080718 (DCUN1D3)
Monocyte (blood)	ENSGALT00000103912 (COMT)	ENSGALT00000107088 (TXNRD2)
Monocyte (blood)	ENSGALT00000104621 (ENSGALG00000053730)	ENSGALT00000092520 (ENSGALG00000051088)
Monocyte (blood)	ENSGALT00000091250 (ENSGALG00000047380)	ENSGALT00000094063 (ENSGALG00000048063)
Monocyte (blood)	ENSGALT00000093088 (ENSGALG00000047380)	ENSGALT00000094063 (ENSGALG00000048063)
Monocyte (blood)	ENSGALT00000102344 (FLOT1)	ENSGALT00000076672 (TUBB)
Monocyte (blood)	ENSGALT00000098694 (FLOT1)	ENSGALT00000076672 (TUBB)
Monocyte (blood)	ENSGALT00000091355 (ENSGALG00000050552)	ENSGALT00000061328 (TMEM141)
Monocyte (blood)	ENSGALT00000054954 (ENSGALG00000042325)	ENSGALT00000007637 (C17H9orf16)
Monocyte (blood)	ENSGALT00000094669 (POMT1)	ENSGALT00000005921 (UCK1)
Monocyte (blood)	ENSGALT00000094763 (GSN)	ENSGALT00000034894 (STOM)
Monocyte (blood)	ENSGALT00000001535 (SCAI)	ENSGALT00000057772 (RPL35)
Monocyte (blood)	ENSGALT00000092995 (SCAI)	ENSGALT00000057772 (RPL35)
Monocyte (blood)	ENSGALT00000103143 (SCAI)	ENSGALT00000057772 (RPL35)
Monocyte (blood)	ENSGALT00000063661 (GAPVD1)	ENSGALT00000001443 (MAPKAP1)
Monocyte (blood)	ENSGALT00000092370 (RALGPS1)	ENSGALT00000001362 (ANGPTL2)
Monocyte (blood)	ENSGALT00000051891 (RALGPS1)	ENSGALT00000001362 (ANGPTL2)
Monocyte (blood)	ENSGALT00000001330 (RALGPS1)	ENSGALT00000001362 (ANGPTL2)
Monocyte (blood)	ENSGALT00000106384 (RALGPS1)	ENSGALT00000001362 (ANGPTL2)
Monocyte (blood)	ENSGALT00000091153 (B3GNTL1)	ENSGALT00000064276 (TBCD)
Monocyte (blood)	ENSGALT00000092441 (B3GNTL1)	ENSGALT00000064276 (TBCD)
Monocyte (blood)	ENSGALT00000100406 (B3GNTL1)	ENSGALT00000064276 (TBCD)
Monocyte (blood)	ENSGALT00000105612 (CENPX)	ENSGALT00000004537 (LRRC45)
Monocyte (blood)	ENSGALT00000006665 (ARSG)	ENSGALT00000006617 (SLC16A6)
Monocyte (blood)	ENSGALT00000076507 (DDX25)	ENSGALT00000073675 (ENSGALG00000033320)
Monocyte (blood)	ENSGALT00000052025 (DDX25)	ENSGALT00000073675 (ENSGALG00000033320)
Monocyte (blood)	ENSGALT00000048512 (ENSGALG00000037051)	ENSGALT00000073675 (ENSGALG00000033320)
Monocyte (blood)	ENSGALT00000073554 (ENSGALG00000037051)	ENSGALT00000073675 (ENSGALG00000033320)
Monocyte (blood)	ENSGALT00000103112 (ENSGALG00000047563)	ENSGALT00000073675 (ENSGALG00000033320)
Monocyte (blood)	ENSGALT00000097527 (ENSGALG00000001049)	ENSGALT00000107005 (MTMR4)
Monocyte (blood)	ENSGALT00000108031 (ENSGALG00000001049)	ENSGALT00000107005 (MTMR4)
Monocyte (blood)	ENSGALT00000007345 (P2RX5)	ENSGALT00000084902 (EMC6)
Monocyte (blood)	ENSGALT00000094278 (ABCF2)	ENSGALT00000097080 (AGAP3)
Monocyte (blood)	ENSGALT00000092482 (ENSGALG00000039186)	ENSGALT00000063763 (WAC)
Monocyte (blood)	ENSGALT00000090361 (METTL6)	ENSGALT00000065313 (EAF1)
Monocyte (blood)	ENSGALT00000057417 (METTL6)	ENSGALT00000065313 (EAF1)
Monocyte (blood)	ENSGALT00000098055 (ACKR4)	ENSGALT00000054111 (ACAD11)
Monocyte (blood)	ENSGALT00000098666 (PIGN)	ENSGALT00000099669 (RELCH)
Monocyte (blood)	ENSGALT00000091120 (PIGN)	ENSGALT00000099669 (RELCH)
Monocyte (blood)	ENSGALT00000090803 (PIGN)	ENSGALT00000099669 (RELCH)
Monocyte (blood)	ENSGALT00000021485 (ENSGALG00000013155)	ENSGALT00000021487 (ZNF830)
Monocyte (blood)	ENSGALT00000062246 (NFS1)	ENSGALT00000085125 (ROMO1)
Monocyte (blood)	ENSGALT00000099697 (NFS1)	ENSGALT00000085125 (ROMO1)
Monocyte (blood)	ENSGALT00000075646 (ENSGALG00000004110)	ENSGALT00000006521 (STK4)
Monocyte (blood)	ENSGALT00000101293 (TTLL9)	ENSGALT00000010407 (DUSP15)
Monocyte (blood)	ENSGALT00000094172 (TTLL9)	ENSGALT00000010407 (DUSP15)
Monocyte (blood)	ENSGALT00000062526 (TTLL9)	ENSGALT00000010407 (DUSP15)
Monocyte (blood)	ENSGALT00000099850 (TTI1)	ENSGALT00000010979 (RPRD1B)
Monocyte (blood)	ENSGALT00000091515 (ENSGALG00000052083)	ENSGALT00000101786 (PTPN1)
Monocyte (blood)	ENSGALT00000049116 (NCAPH)	ENSGALT00000107458 (ENSGALG00000050253)
Monocyte (blood)	ENSGALT00000044183 (ENSGALG00000029066)	ENSGALT00000073836 (YTHDF2)
Monocyte (blood)	ENSGALT00000106377 (PAFAH2)	ENSGALT00000053717 (ENSGALG00000043829)
Monocyte (blood)	ENSGALT00000101477 (NNF1)	ENSGALT00000094228 (ENSGALG00000051101)
Monocyte (blood)	ENSGALT00000094196 (ENSGALG00000052789)	ENSGALT00000094228 (ENSGALG00000051101)
Monocyte (blood)	ENSGALT00000070835 (HYLS1)	ENSGALT00000041115 (RPUSD4)
Monocyte (blood)	ENSGALT00000102456 (ENSGALG00000052833)	ENSGALT00000040801 (PDZD3)
Monocyte (blood)	ENSGALT00000102697 (ENSGALG00000052849)	ENSGALT00000098340 (ENSGALG00000048712)
Monocyte (blood)	ENSGALT00000106295 (LAMTOR2)	ENSGALT00000072558 (UBQLN4)
Monocyte (blood)	ENSGALT00000048967 (SYPL2)	ENSGALT00000074807 (PSMA5)
Monocyte (blood)	ENSGALT00000102396 (RASSF5)	ENSGALT00000001255 (EIF2D)
Monocyte (blood)	ENSGALT00000002093 (TRAF3IP3)	ENSGALT00000045853 (ADORA3)
Monocyte (blood)	ENSGALT00000066456 (APBA3)	ENSGALT00000045101 (MRPL54)
Monocyte (blood)	ENSGALT00000005915 (HAUS8)	ENSGALT00000048011 (MYO9B)
Monocyte (blood)	ENSGALT00000100637 (TPCN3)	ENSGALT00000013347 (NPHP1)
Monocyte (blood)	ENSGALT00000013911 (KLHDC3)	ENSGALT00000060209 (MEA1)
Monocyte (blood)	ENSGALT00000106491 (AIDA)	ENSGALT00000015332 (BROX)
Monocyte (blood)	ENSGALT00000092997 (ENSGALG00000049568)	ENSGALT00000051293 (MCFD2)
Monocyte (blood)	ENSGALT00000016321 (RBKS)	ENSGALT00000107891 (MRPL33)
Monocyte (blood)	ENSGALT00000104183 (ENSGALG00000054532)	ENSGALT00000017157 (BIRC6)
Monocyte (blood)	ENSGALT00000084731 (TCP1)	ENSGALT00000019060 (ACAT2)
Monocyte (blood)	ENSGALT00000103779 (CLDN20)	ENSGALT00000022196 (TFB1M)
Monocyte (blood)	ENSGALT00000067131 (ENSGALG00000038188)	ENSGALT00000097646 (AKAP7)
Monocyte (blood)	ENSGALT00000024014 (MCM9)	ENSGALT00000073491 (ASF1A)
Monocyte (blood)	ENSGALT00000060832 (ANGPT2)	ENSGALT00000086126 (MCPH1)
Monocyte (blood)	ENSGALT00000070715 (ATP6V1C2)	ENSGALT00000026538 (PDIA6)
Monocyte (blood)	ENSGALT00000049708 (C3)	ENSGALT00000097817 (EVI5L)
Monocyte (blood)	ENSGALT00000093677 (ENSGALG00000038666)	ENSGALT00000081607 (UBL5)
Monocyte (blood)	ENSGALT00000092669 (ENSGALG00000038666)	ENSGALT00000081607 (UBL5)
Monocyte (blood)	ENSGALT00000098366 (ENSGALG00000048625)	ENSGALT00000100976 (ENSGALG00000054294)
Monocyte (blood)	ENSGALT00000095132 (ENSGALG00000052207)	ENSGALT00000082934 (ENSGALG00000047610)
Monocyte (blood)	ENSGALT00000104888 (SAE1)	ENSGALT00000100677 (ENSGALG00000049505)
Monocyte (blood)	ENSGALT00000093505 (ENSGALG00000047202)	ENSGALT00000084735 (ENSGALG00000046730)
Monocyte (blood)	ENSGALT00000082408 (MARS)	ENSGALT00000050399 (ENSGALG00000031518)
Monocyte (blood)	ENSGALT00000100309 (CCS)	ENSGALT00000106519 (ENSGALG00000050539)
Monocyte (blood)	ENSGALT00000103173 (CCS)	ENSGALT00000106519 (ENSGALG00000050539)
Monocyte (blood)	ENSGALT00000098707 (CCS)	ENSGALT00000106519 (ENSGALG00000050539)
Monocyte (blood)	ENSGALT00000052009 (CSAD)	ENSGALT00000086793 (ZNF740)
Monocyte (blood)	ENSGALT00000093709 (AWAT1)	ENSGALT00000006933 (P2RY4)
Monocyte (blood)	ENSGALT00000087023 (TAF7)	ENSGALT00000007977 (ENSGALG00000004975)
Monocyte (blood)	ENSGALT00000104049 (ENSGALG00000051025)	ENSGALT00000080817 (ENSGALG00000029462)
Monocyte (blood)	ENSGALT00000076253 (RAPGEF2)	ENSGALT00000093685 (ENSGALG00000050541)
Monocyte (blood)	ENSGALT00000080651 (RAPGEF2)	ENSGALT00000093685 (ENSGALG00000050541)
Monocyte (blood)	ENSGALT00000104517 (ENSGALG00000048950)	ENSGALT00000016223 (ZNF827)
Monocyte (blood)	ENSGALT00000087558 (MAB21L2)	ENSGALT00000056918 (LRBA)
Monocyte (blood)	ENSGALT00000089384 (ABHD18)	ENSGALT00000016578 (MFSD8)
Monocyte (blood)	ENSGALT00000100963 (CASP3)	ENSGALT00000038264 (PRIMPOL)
Monocyte (blood)	ENSGALT00000071528 (WDFY3)	ENSGALT00000018386 (PPM1K)
Monocyte (blood)	ENSGALT00000101063 (IGFBP7)	ENSGALT00000037965 (POLR2B)
Monocyte (blood)	ENSGALT00000100752 (ENSGALG00000052156)	ENSGALT00000078117 (ENSGALG00000041205)
Monocyte (blood)	ENSGALT00000084003 (NOP56)	ENSGALT00000052568 (IDH3B)
Monocyte (blood)	ENSGALT00000073888 (TMEM138)	ENSGALT00000069064 (CYB561A3)
Monocyte (blood)	ENSGALT00000105660 (ELP4)	ENSGALT00000031814 (IMMP1L)
Monocyte (blood)	ENSGALT00000103240 (ELP4)	ENSGALT00000031814 (IMMP1L)
Monocyte (blood)	ENSGALT00000104114 (ELP4)	ENSGALT00000031814 (IMMP1L)
Monocyte (blood)	ENSGALT00000055681 (ENSGALG00000030266)	ENSGALT00000019117 (HIPK3)
Monocyte (blood)	ENSGALT00000009761 (CALCA)	ENSGALT00000009745 (CYP2R1)
Monocyte (blood)	ENSGALT00000052256 (GSTZ1)	ENSGALT00000073797 (POMT2)
Monocyte (blood)	ENSGALT00000087710 (SLIRP)	ENSGALT00000017074 (ALKBH1)
Monocyte (blood)	ENSGALT00000102633 (ADCK1)	ENSGALT00000017099 (SNW1)
Monocyte (blood)	ENSGALT00000101237 (GSKIP)	ENSGALT00000066952 (ATG2B)
Monocyte (blood)	ENSGALT00000019771 (EXOC5)	ENSGALT00000019765 (AP5M1)
Monocyte (blood)	ENSGALT00000020080 (ATP5S)	ENSGALT00000020088 (CDKL1)
Monocyte (blood)	ENSGALT00000074859 (ATP5S)	ENSGALT00000020088 (CDKL1)
Monocyte (blood)	ENSGALT00000020162 (ATL1)	ENSGALT00000020164 (SAV1)
Monocyte (blood)	ENSGALT00000020371 (SOUL)	ENSGALT00000057113 (FANCM)
Monocyte (blood)	ENSGALT00000103622 (ENSGALG00000040737)	ENSGALT00000071346 (ENSGALG00000043130)
Monocyte (blood)	ENSGALT00000084213 (ENSGALG00000040737)	ENSGALT00000071346 (ENSGALG00000043130)
Monocyte (blood)	ENSGALT00000084769 (ENSGALG00000031497)	ENSGALT00000071346 (ENSGALG00000043130)
Monocyte (blood)	ENSGALT00000082674 (RTKN2)	ENSGALT00000004693 (ZNF365)
Monocyte (blood)	ENSGALT00000012572 (POLL)	ENSGALT00000012535 (DPCD)
Monocyte (blood)	ENSGALT00000091708 (POLL)	ENSGALT00000012535 (DPCD)
Monocyte (blood)	ENSGALT00000014159 (PDCD4)	ENSGALT00000057879 (BBIP1)
Monocyte (blood)	ENSGALT00000090332 (PDCD4)	ENSGALT00000057879 (BBIP1)
Monocyte (blood)	ENSGALT00000073063 (SLC25A12)	ENSGALT00000015508 (HAT1)
Monocyte (blood)	ENSGALT00000101331 (ENSGALG00000049902)	ENSGALT00000063949 (ENSGALG00000041782)
Monocyte (blood)	ENSGALT00000099635 (ENSGALG00000049902)	ENSGALT00000063949 (ENSGALG00000041782)
Monocyte (blood)	ENSGALT00000053904 (TPR)	ENSGALT00000008146 (C8H1orf27)
Monocyte (blood)	ENSGALT00000101069 (SZT2)	ENSGALT00000016237 (MED8)
Monocyte (blood)	ENSGALT00000106714 (MRPL37)	ENSGALT00000017496 (ENSGALG00000010758)
Monocyte (blood)	ENSGALT00000053156 (FGGY)	ENSGALT00000038039 (JUN)
Monocyte (blood)	ENSGALT00000055523 (FGGY)	ENSGALT00000038039 (JUN)
Monocyte (blood)	ENSGALT00000055431 (FGGY)	ENSGALT00000038039 (JUN)
Monocyte (blood)	ENSGALT00000068062 (CEP19)	ENSGALT00000010346 (PIGX)
Monocyte (blood)	ENSGALT00000092864 (CEP19)	ENSGALT00000090549 (NRROS)
Monocyte (blood)	ENSGALT00000106565 (ENSGALG00000020986)	ENSGALT00000093033 (ENSGALG00000050793)
Monocyte (blood)	ENSGALT00000040843 (MOGAT1)	ENSGALT00000008412 (FARSB)
Monocyte (blood)	ENSGALT00000004364 (ATP1B3)	ENSGALT00000076898 (TFDP2)
Monocyte (blood)	ENSGALT00000048841 (MCF2L2)	ENSGALT00000058942 (B3GNT5)
Monocyte (blood)	ENSGALT00000080536 (GPR171)	ENSGALT00000016895 (MED12L)
Monocyte (blood)	ENSGALT00000104594 (CP)	ENSGALT00000082756 (HPS3)
Monocyte (blood)	ENSGALT00000104499 (CHIR-AB1)	ENSGALT00000101722 (ENSGALG00000048491)
Monocyte (blood)	ENSGALT00000103847 (COLGALT1)	ENSGALT00000107074 (PRKCSH)
Monocyte (blood)	ENSGALT00000099937 (ENSGALG00000047839)	ENSGALT00000096825 (ENSGALG00000048542)
Monocyte (blood)	ENSGALT00000098903 (ENSGALG00000051123)	ENSGALT00000048652 (ENSGALG00000027170)
Monocyte (blood)	ENSGALT00000086152 (ENSGALG00000045131)	ENSGALT00000074031 (ENSGALG00000038064)
Monocyte (blood)	ENSGALT00000104004 (ENSGALG00000052041)	ENSGALT00000074031 (ENSGALG00000038064)
Monocyte (blood)	ENSGALT00000091299 (ENSGALG00000048432)	ENSGALT00000053584 (ENSGALG00000034488)
Monocyte (blood)	ENSGALT00000039477 (IFNW1)	ENSGALT00000095477 (ENSGALG00000013809)
Monocyte (blood)	ENSGALT00000101642 (IFN-A)	ENSGALT00000095477 (ENSGALG00000013809)
Monocyte (blood)	ENSGALT00000092218 (IFN-A)	ENSGALT00000095477 (ENSGALG00000013809)
Monocyte (blood)	ENSGALT00000100222 (ENSGALG00000054396)	ENSGALT00000095477 (ENSGALG00000013809)
Monocyte (blood)	ENSGALT00000091729 (IFN-A)	ENSGALT00000095477 (ENSGALG00000013809)
Monocyte (blood)	ENSGALT00000102661 (IFN-A)	ENSGALT00000095477 (ENSGALG00000013809)
Monocyte (blood)	ENSGALT00000083687 (ENSGALG00000044725)	ENSGALT00000095477 (ENSGALG00000013809)
Monocyte (blood)	ENSGALT00000107243 (IFN-A)	ENSGALT00000095477 (ENSGALG00000013809)
Monocyte (blood)	ENSGALT00000096515 (ENSGALG00000052209)	ENSGALT00000095477 (ENSGALG00000013809)
Monocyte (blood)	ENSGALT00000089674 (TRAPPC13)	ENSGALT00000023814 (TRIM23)
Monocyte (blood)	ENSGALT00000023817 (TRAPPC13)	ENSGALT00000023814 (TRIM23)
Monocyte (blood)	ENSGALT00000106415 (ENSGALG00000017558)	ENSGALT00000042981 (ENSGALG00000029118)
Ovary	ENSGALT00000105029 (CLC2DL3)	ENSGALT00000104150 (ENSGALG00000048857)
Ovary	ENSGALT00000013282 (GDI1)	ENSGALT00000096214 (TASOR2)
Ovary	ENSGALT00000013830 (CACNA2D1)	ENSGALT00000106257 (ENSGALG00000048859)
Ovary	ENSGALT00000013522 (FGL2)	ENSGALT00000095496 (ENSGALG00000008309)
Ovary	ENSGALT00000013515 (FAM185A)	ENSGALT00000095496 (ENSGALG00000008309)
Ovary	ENSGALT00000013186 (RINT1)	ENSGALT00000104579 (EFCAB10)
Ovary	ENSGALT00000011632 (ERGIC2)	ENSGALT00000104032 (LAMB1)
Ovary	ENSGALT00000038864 (IMMP2L)	ENSGALT00000015449 (LRRN3)
Ovary	ENSGALT00000018475 (SNAPC3)	ENSGALT00000054741 (TMCC3)
Ovary	ENSGALT00000020934 (AKR1D1)	ENSGALT00000104690 (ENSGALG00000049530)
Ovary	ENSGALT00000091338 (ABCC9)	ENSGALT00000092742 (ENSGALG00000053183)
Ovary	ENSGALT00000094503 (CCDC91)	ENSGALT00000094854 (ENSGALG00000051865)
Ovary	ENSGALT00000024924 (ILDR2)	ENSGALT00000102254 (ENSGALG00000052023)
Ovary	ENSGALT00000091281 (ENSGALG00000047085)	ENSGALT00000078046 (ENSGALG00000036436)
Ovary	ENSGALT00000094603 (ENSGALG00000048133)	ENSGALT00000097813 (ENSGALG00000047373)
Ovary	ENSGALT00000030337 (GATD3A)	ENSGALT00000101667 (ENSGALG00000052076)
Ovary	ENSGALT00000027117 (C1H2ORF49)	ENSGALT00000027119 (FHL2)
Ovary	ENSGALT00000027298 (UGGT2)	ENSGALT00000089693 (DNAJC3)
Ovary	ENSGALT00000027426 (GTF2F2)	ENSGALT00000027428 (KCTD4)
Ovary	ENSGALT00000091123 (ENSGALG00000047924)	ENSGALT00000098387 (ENSGALG00000038550)
Ovary	ENSGALT00000103620 (ENSGALG00000047924)	ENSGALT00000098387 (ENSGALG00000038550)
Ovary	ENSGALT00000104377 (NEO1)	ENSGALT00000095654 (ENSGALG00000055009)
Ovary	ENSGALT00000099856 (MTMR10)	ENSGALT00000088600 (FAN1)
Ovary	ENSGALT00000056594 (NTRK3)	ENSGALT00000094159 (ENSGALG00000049960)
Ovary	ENSGALT00000074963 (SMAD3)	ENSGALT00000012808 (AAGAB)
Ovary	ENSGALT00000085464 (VPS35)	ENSGALT00000063938 (ORC6)
Ovary	ENSGALT00000007726 (GPATCH1)	ENSGALT00000007532 (SLC7A10)
Ovary	ENSGALT00000008632 (WWOX)	ENSGALT00000104098 (ENSGALG00000050479)
Ovary	ENSGALT00000000745 (GAS8)	ENSGALT00000000763 (URAH)
Ovary	ENSGALT00000104697 (ENSGALG00000054901)	ENSGALT00000098147 (ENSGALG00000051236)
Ovary	ENSGALT00000006843 (DNAH1)	ENSGALT00000099716 (ENSGALG00000021198)
Ovary	ENSGALT00000044551 (NINJ1)	ENSGALT00000092197 (ENSGALG00000049146)
Ovary	ENSGALT00000008865 (APPL1)	ENSGALT00000008837 (HESX1)
Ovary	ENSGALT00000013716 (CAND2)	ENSGALT00000047226 (SEC13)
Ovary	ENSGALT00000047574 (SLU7)	ENSGALT00000049104 (PTTG2)
Ovary	ENSGALT00000050464 (SLU7)	ENSGALT00000049104 (PTTG2)
Ovary	ENSGALT00000006272 (GEMIN5)	ENSGALT00000006244 (MRPL22)
Ovary	ENSGALT00000006650 (SPARC)	ENSGALT00000074401 (ENSGALG00000033148)
Ovary	ENSGALT00000010256 (CXCL14)	ENSGALT00000091579 (ENSGALG00000053609)
Ovary	ENSGALT00000090731 (BRI3)	ENSGALT00000106627 (TECPR1)
Ovary	ENSGALT00000104748 (ENSGALG00000050188)	ENSGALT00000094966 (ENSGALG00000050196)
Ovary	ENSGALT00000093605 (ENSGALG00000054605)	ENSGALT00000100932 (RBFOX1)
Ovary	ENSGALT00000062389 (CDIP1)	ENSGALT00000104678 (ENSGALG00000035115)
Ovary	ENSGALT00000090507 (VASN)	ENSGALT00000067660 (CORO7)
Ovary	ENSGALT00000096935 (DNAJA3)	ENSGALT00000067660 (CORO7)
Ovary	ENSGALT00000012696 (DNAJA3)	ENSGALT00000067660 (CORO7)
Ovary	ENSGALT00000105694 (ENSGALG00000048316)	ENSGALT00000104229 (HIC2)
Ovary	ENSGALT00000101066 (ENSGALG00000050132)	ENSGALT00000083182 (ENSGALG00000044472)
Ovary	ENSGALT00000091475 (ENSGALG00000047380)	ENSGALT00000061063 (ENSGALG00000052686)
Ovary	ENSGALT00000000183 (BLEC1)	ENSGALT00000068635 (BLB1)
Ovary	ENSGALT00000040102 (CACNA1B)	ENSGALT00000106879 (ENSGALG00000048711)
Ovary	ENSGALT00000056382 (TOR2A)	ENSGALT00000083587 (ENSGALG00000045436)
Ovary	ENSGALT00000039770 (SPTAN1)	ENSGALT00000075115 (WDR34)
Ovary	ENSGALT00000005036 (ENSGALG00000003175)	ENSGALT00000091916 (REXO4)
Ovary	ENSGALT00000004723 (UTP18)	ENSGALT00000055662 (MBTD1)
Ovary	ENSGALT00000019296 (CANT1)	ENSGALT00000101732 (ENGASE)
Ovary	ENSGALT00000049551 (ENSGALG00000037051)	ENSGALT00000101851 (ENSGALG00000054415)
Ovary	ENSGALT00000053956 (ENSGALG00000037051)	ENSGALT00000101851 (ENSGALG00000054415)
Ovary	ENSGALT00000088357 (TMEM120A)	ENSGALT00000003192 (POR)
Ovary	ENSGALT00000007038 (TTC19)	ENSGALT00000086763 (ZSWIM7)
Ovary	ENSGALT00000050118 (EVI2A)	ENSGALT00000050895 (NF1)
Ovary	ENSGALT00000068634 (ENSGALG00000035589)	ENSGALT00000050895 (NF1)
Ovary	ENSGALT00000092342 (CDK5)	ENSGALT00000103447 (ENSGALG00000051417)
Ovary	ENSGALT00000073663 (ENSGALG00000038330)	ENSGALT00000098700 (NOS3)
Ovary	ENSGALT00000092845 (ENSGALG00000053613)	ENSGALT00000012598 (KIAA1217)
Ovary	ENSGALT00000097782 (ENSGALG00000035994)	ENSGALT00000100485 (TFPI2)
Ovary	ENSGALT00000065275 (CBX3)	ENSGALT00000090968 (HNRNPA2B1)
Ovary	ENSGALT00000018380 (KCNH8)	ENSGALT00000100172 (ENSGALG00000048569)
Ovary	ENSGALT00000078762 (CNTNAP2)	ENSGALT00000100952 (ENSGALG00000048525)
Ovary	ENSGALT00000094838 (ENSGALG00000049242)	ENSGALT00000093368 (ENSGALG00000046360)
Ovary	ENSGALT00000046804 (FHOD3)	ENSGALT00000044031 (ENSGALG00000027289)
Ovary	ENSGALT00000058859 (FHOD3)	ENSGALT00000044031 (ENSGALG00000027289)
Ovary	ENSGALT00000024186 (CABLES1)	ENSGALT00000097691 (TMEM241)
Ovary	ENSGALT00000046248 (TERF1)	ENSGALT00000047667 (SBSPON)
Ovary	ENSGALT00000059601 (PTDSS1)	ENSGALT00000088465 (MTERF3)
Ovary	ENSGALT00000062465 (SCX)	ENSGALT00000105884 (BOP1)
Ovary	ENSGALT00000006537 (ENSGALG00000004110)	ENSGALT00000072864 (STK4)
Ovary	ENSGALT00000051559 (CDH4)	ENSGALT00000106847 (ENSGALG00000050549)
Ovary	ENSGALT00000085389 (SIRPA)	ENSGALT00000097226 (gga-mir-12243)
Ovary	ENSGALT00000012430 (BMP7)	ENSGALT00000095230 (ENSGALG00000051340)
Ovary	ENSGALT00000091861 (ENSGALG00000055005)	ENSGALT00000075030 (ATAD3A)
Ovary	ENSGALT00000103706 (ENSGALG00000055005)	ENSGALT00000075030 (ATAD3A)
Ovary	ENSGALT00000101019 (ENSGALG00000046740)	ENSGALT00000076659 (XPO7)
Ovary	ENSGALT00000062687 (ENSGALG00000031789)	ENSGALT00000094176 (HK2)
Ovary	ENSGALT00000093248 (ENSGALG00000052295)	ENSGALT00000098443 (HK2)
Ovary	ENSGALT00000064031 (ADD2)	ENSGALT00000098443 (HK2)
Ovary	ENSGALT00000022512 (SNRNP27)	ENSGALT00000098443 (HK2)
Ovary	ENSGALT00000022511 (MXD1)	ENSGALT00000098443 (HK2)
Ovary	ENSGALT00000049065 (ENSGALG00000037052)	ENSGALT00000106549 (ENSGALG00000046649)
Ovary	ENSGALT00000005575 (RBBP4)	ENSGALT00000097257 (ZBTB8OS)
Ovary	ENSGALT00000093495 (RBBP4)	ENSGALT00000097257 (ZBTB8OS)
Ovary	ENSGALT00000006375 (LYPLA2)	ENSGALT00000107700 (GALE)
Ovary	ENSGALT00000082329 (HYLS1)	ENSGALT00000001417 (PUS3)
Ovary	ENSGALT00000070835 (HYLS1)	ENSGALT00000001417 (PUS3)
Ovary	ENSGALT00000052400 (ENSGALG00000037802)	ENSGALT00000097066 (ENSGALG00000050392)
Ovary	ENSGALT00000045737 (SNAPIN)	ENSGALT00000018872 (ILF2)
Ovary	ENSGALT00000045397 (CELF5)	ENSGALT00000054883 (HSD11B1L)
Ovary	ENSGALT00000102211 (CFD)	ENSGALT00000099690 (MED16)
Ovary	ENSGALT00000060660 (DAZAP1)	ENSGALT00000071548 (ENSGALG00000040182)
Ovary	ENSGALT00000043204 (ASB3)	ENSGALT00000013322 (CHAC2)
Ovary	ENSGALT00000014813 (FSHR)	ENSGALT00000076141 (ENSGALG00000032863)
Ovary	ENSGALT00000057642 (CEP68)	ENSGALT00000071042 (RAB1B)
Ovary	ENSGALT00000010139 (GINS1)	ENSGALT00000098568 (ENSGALG00000023506)
Ovary	ENSGALT00000076325 (ESRRG)	ENSGALT00000104526 (ENSGALG00000041996)
Ovary	ENSGALT00000066689 (ESRRG)	ENSGALT00000104526 (ENSGALG00000041996)
Ovary	ENSGALT00000061391 (CAMKMT)	ENSGALT00000107648 (ENSGALG00000048468)
Ovary	ENSGALT00000016260 (RHOQ)	ENSGALT00000054390 (PIGF)
Ovary	ENSGALT00000016264 (CRIPT)	ENSGALT00000054390 (PIGF)
Ovary	ENSGALT00000065777 (SMYD3)	ENSGALT00000097056 (KIF26B)
Ovary	ENSGALT00000018217 (PSMB1)	ENSGALT00000084343 (TBP)
Ovary	ENSGALT00000057441 (DACT2)	ENSGALT00000103155 (ENSGALG00000049089)
Ovary	ENSGALT00000070812 (C3)	ENSGALT00000095780 (EVI5L)
Ovary	ENSGALT00000055337 (C3)	ENSGALT00000095780 (EVI5L)
Ovary	ENSGALT00000107057 (ENSGALG00000047412)	ENSGALT00000092104 (ENSGALG00000049292)
Ovary	ENSGALT00000082408 (MARS)	ENSGALT00000100437 (ENSGALG00000031996)
Ovary	ENSGALT00000105145 (ENSGALG00000047565)	ENSGALT00000103066 (ENSGALG00000053973)
Ovary	ENSGALT00000009554 (AGTR2)	ENSGALT00000053085 (ENSGALG00000042318)
Ovary	ENSGALT00000080145 (NRK)	ENSGALT00000107288 (ENSGALG00000051675)
Ovary	ENSGALT00000014591 (NRK)	ENSGALT00000107288 (ENSGALG00000051675)
Ovary	ENSGALT00000014910 (IDS)	ENSGALT00000088976 (ENSGALG00000029286)
Ovary	ENSGALT00000015353 (RXFP1)	ENSGALT00000096658 (C4orf46)
Ovary	ENSGALT00000015372 (ETFDH)	ENSGALT00000096658 (C4orf46)
Ovary	ENSGALT00000038777 (APELA)	ENSGALT00000015511 (TMEM192)
Ovary	ENSGALT00000032215 (CENPU)	ENSGALT00000095844 (PRIMPOL)
Ovary	ENSGALT00000019606 (NDST4)	ENSGALT00000090810 (ENSGALG00000050768)
Ovary	ENSGALT00000019958 (RAP1GDS1)	ENSGALT00000098346 (ENSGALG00000047368)
Ovary	ENSGALT00000048242 (RAP1GDS1)	ENSGALT00000098346 (ENSGALG00000047368)
Ovary	ENSGALT00000022312 (PPAT)	ENSGALT00000097634 (PAICS)
Ovary	ENSGALT00000070225 (USP46)	ENSGALT00000096732 (ENSGALG00000054475)
Ovary	ENSGALT00000028196 (LCORL)	ENSGALT00000023302 (NCAPG)
Ovary	ENSGALT00000090978 (ENSGALG00000051383)	ENSGALT00000023302 (NCAPG)
Ovary	ENSGALT00000065542 (ENSGALG00000054173)	ENSGALT00000023302 (NCAPG)
Ovary	ENSGALT00000079016 (RAD9A)	ENSGALT00000085502 (PPP1CA)
Ovary	ENSGALT00000086995 (TMEM138)	ENSGALT00000089662 (CYB561A3)
Ovary	ENSGALT00000006309 (PRMT3)	ENSGALT00000107755 (ENSGALG00000047154)
Ovary	ENSGALT00000078848 (NELL1)	ENSGALT00000095919 (ENSGALG00000051731)
Ovary	ENSGALT00000021712 (BBOX1)	ENSGALT00000108062 (ENSGALG00000051300)
Ovary	ENSGALT00000065948 (ENSGALG00000030338)	ENSGALT00000106673 (ENSGALG00000052290)
Ovary	ENSGALT00000093486 (ANO1)	ENSGALT00000097578 (ENSGALG00000050818)
Ovary	ENSGALT00000104647 (ANO1)	ENSGALT00000097578 (ENSGALG00000050818)
Ovary	ENSGALT00000092009 (ENSGALG00000049350)	ENSGALT00000073006 (SLC1A2)
Ovary	ENSGALT00000013368 (ACP2)	ENSGALT00000013377 (DDB2)
Ovary	ENSGALT00000045646 (CHAC1)	ENSGALT00000107557 (INO80)
Ovary	ENSGALT00000028069 (ERH)	ENSGALT00000096274 (SLC39A9)
Ovary	ENSGALT00000037710 (TTLL5)	ENSGALT00000086882 (ENSGALG00000034354)
Ovary	ENSGALT00000089352 (TTLL5)	ENSGALT00000086882 (ENSGALG00000034354)
Ovary	ENSGALT00000048369 (VASH1)	ENSGALT00000099151 (ANGEL1)
Ovary	ENSGALT00000102283 (ENSGALG00000053559)	ENSGALT00000099151 (ANGEL1)
Ovary	ENSGALT00000097358 (ENSGALG00000046775)	ENSGALT00000096356 (ENSGALG00000051504)
Ovary	ENSGALT00000105877 (ENSGALG00000046775)	ENSGALT00000096356 (ENSGALG00000051504)
Ovary	ENSGALT00000003306 (PARG)	ENSGALT00000078947 (ENSGALG00000002089)
Ovary	ENSGALT00000004486 (CTNNA3)	ENSGALT00000034096 (LRRTM3)
Ovary	ENSGALT00000043311 (ZCCHC24)	ENSGALT00000094505 (ENSGALG00000051874)
Ovary	ENSGALT00000052471 (AP3M1)	ENSGALT00000093117 (ENSGALG00000054579)
Ovary	ENSGALT00000094369 (ENSGALG00000038416)	ENSGALT00000093742 (ENSGALG00000049341)
Ovary	ENSGALT00000060533 (ENSGALG00000038416)	ENSGALT00000093742 (ENSGALG00000049341)
Ovary	ENSGALT00000015203 (FAM45A)	ENSGALT00000090721 (SFXN4)
Ovary	ENSGALT00000054973 (ALDH18A1)	ENSGALT00000103444 (ENSGALG00000051783)
Ovary	ENSGALT00000054299 (MAIP1)	ENSGALT00000106701 (TYW5)
Ovary	ENSGALT00000023090 (CIR1)	ENSGALT00000067425 (SCRN3)
Ovary	ENSGALT00000015749 (METTL5)	ENSGALT00000100882 (SSB)
Ovary	ENSGALT00000042561 (ENSGALG00000025648)	ENSGALT00000090491 (CLASP1)
Ovary	ENSGALT00000003258 (GPSM2)	ENSGALT00000068085 (CLCC1)
Ovary	ENSGALT00000006824 (ANGPTL1)	ENSGALT00000064580 (RALGPS2)
Ovary	ENSGALT00000009017 (F3)	ENSGALT00000057501 (SLC44A3)
Ovary	ENSGALT00000092723 (ENSGALG00000049560)	ENSGALT00000097476 (ENSGALG00000053059)
Ovary	ENSGALT00000053156 (FGGY)	ENSGALT00000077435 (ENSGALG00000043245)
Ovary	ENSGALT00000092592 (ENSGALG00000052372)	ENSGALT00000046984 (ENSGALG00000031929)
Ovary	ENSGALT00000107392 (ENSGALG00000052372)	ENSGALT00000046984 (ENSGALG00000031929)
Ovary	ENSGALT00000049432 (ENSGALG00000030075)	ENSGALT00000062132 (ENSGALG00000043610)
Ovary	ENSGALT00000086152 (ENSGALG00000045131)	ENSGALT00000078580 (ENSGALG00000038064)
Ovary	ENSGALT00000052116 (ENSGALG00000034584)	ENSGALT00000106921 (ENSGALG00000053757)
Ovary	ENSGALT00000003796 (GBA2)	ENSGALT00000088738 (RGP1)
Ovary	ENSGALT00000004088 (ARHGEF39)	ENSGALT00000090765 (ENSGALG00000037611)
Ovary	ENSGALT00000023719 (SKIV2L2)	ENSGALT00000057954 (PLPP1)
Ovary	ENSGALT00000023818 (TRAPPC13)	ENSGALT00000069401 (TRIM23)
Ovary	ENSGALT00000028137 (OSTF1)	ENSGALT00000077373 (NMRK1)
Ovary	ENSGALT00000023641 (TTC37)	ENSGALT00000063159 (ARSK)
Ovary	ENSGALT00000092620 (ENSGALG00000050492)	ENSGALT00000100330 (RNF20)
Ovary	ENSGALT00000037630 (ALDOB)	ENSGALT00000100330 (RNF20)
Ovary	ENSGALT00000010717 (TMEM243)	ENSGALT00000075153 (DMTF1)
Ovary	ENSGALT00000103153 (ENSGALG00000051944)	ENSGALT00000095513 (BICD1)
Ovary	ENSGALT00000101955 (CACNA1C)	ENSGALT00000097702 (DCP1B)
Ovary	ENSGALT00000054139 (CACNA1C)	ENSGALT00000094083 (ENSGALG00000047552)
Ovary	ENSGALT00000094891 (CACNA1C)	ENSGALT00000094083 (ENSGALG00000047552)
Ovary	ENSGALT00000093926 (CACNA1C)	ENSGALT00000094083 (ENSGALG00000047552)
Ovary	ENSGALT00000107443 (CACNA1C)	ENSGALT00000094083 (ENSGALG00000047552)
Ovary	ENSGALT00000098495 (CACNA1C)	ENSGALT00000094083 (ENSGALG00000047552)
Ovary	ENSGALT00000021261 (CACNA1C)	ENSGALT00000094083 (ENSGALG00000047552)
Ovary	ENSGALT00000107872 (CACNA1C)	ENSGALT00000094083 (ENSGALG00000047552)
Ovary	ENSGALT00000022724 (ETFRF1)	ENSGALT00000063299 (KRAS)
Ovary	ENSGALT00000092764 (PNPLA3)	ENSGALT00000022945 (SULT4A1)
Ovary	ENSGALT00000106252 (ENSGALG00000049435)	ENSGALT00000099171 (ENSGALG00000048026)
Ovary	ENSGALT00000099773 (ENSGALG00000052513)	ENSGALT00000023174 (TSPAN9)
Ovary	ENSGALT00000081603 (ENSGALG00000040898)	ENSGALT00000102923 (ENSGALG00000050907)
Ovary	ENSGALT00000100404 (ENSGALG00000049912)	ENSGALT00000094338 (ENSGALG00000052801)
Ovary	ENSGALT00000098920 (ENSGALG00000049912)	ENSGALT00000094338 (ENSGALG00000052801)
Ovary	ENSGALT00000104233 (ENSGALG00000049696)	ENSGALT00000064042 (ENSGALG00000039529)
Ovary	ENSGALT00000102122 (ENSGALG00000049696)	ENSGALT00000064042 (ENSGALG00000039529)
Ovary	ENSGALT00000091824 (NEPRO)	ENSGALT00000085162 (TAF13)
Ovary	ENSGALT00000024500 (NEPRO)	ENSGALT00000085162 (TAF13)
Ovary	ENSGALT00000094022 (NME7)	ENSGALT00000036926 (ATP1B1)
Ovary	ENSGALT00000098860 (ENSGALG00000054836)	ENSGALT00000024790 (KIAA1524)
Ovary	ENSGALT00000095806 (ENSGALG00000047821)	ENSGALT00000024926 (ZFP92)
Ovary	ENSGALT00000105738 (CD80)	ENSGALT00000041393 (TIMMDC1)
Ovary	ENSGALT00000054938 (CASK)	ENSGALT00000026167 (GPR34)
Ovary	ENSGALT00000098634 (ENSGALG00000052492)	ENSGALT00000049598 (FRMPD4)
Ovary	ENSGALT00000027271 (GPR183)	ENSGALT00000058077 (UBAC2)
Ovary	ENSGALT00000090221 (MAB21L1)	ENSGALT00000027556 (NBEA)
Ovary	ENSGALT00000104547 (ENSGALG00000053592)	ENSGALT00000079258 (PDS5B)
Ovary	ENSGALT00000096056 (ENSGALG00000053592)	ENSGALT00000079258 (PDS5B)
Ovary	ENSGALT00000092350 (MTIF3)	ENSGALT00000027621 (GTF3A)
Ovary	ENSGALT00000091286 (MTIF3)	ENSGALT00000027621 (GTF3A)
Ovary	ENSGALT00000028519 (ENSGALG00000017812)	ENSGALT00000060059 (ENSGALG00000040433)
Ovary	ENSGALT00000028521 (ENSGALG00000017814)	ENSGALT00000060059 (ENSGALG00000040433)
Ovary	ENSGALT00000028522 (ENSGALG00000017815)	ENSGALT00000060059 (ENSGALG00000040433)
Ovary	ENSGALT00000041478 (ENSGALG00000024565)	ENSGALT00000060059 (ENSGALG00000040433)
Ovary	ENSGALT00000027995 (FAM168A)	ENSGALT00000086546 (ENSGALG00000044739)
Ovary	ENSGALT00000078703 (FCHSD2)	ENSGALT00000027999 (ARHGEF17)
Ovary	ENSGALT00000095164 (gga-mir-12216)	ENSGALT00000003397 (PATL2)
Ovary	ENSGALT00000082543 (ENSGALG00000033780)	ENSGALT00000058852 (ITGB1BP3)
Ovary	ENSGALT00000051937 (ENSGALG00000033780)	ENSGALT00000058852 (ITGB1BP3)
Ovary	ENSGALT00000097973 (ENSGALG00000033780)	ENSGALT00000058852 (ITGB1BP3)
Ovary	ENSGALT00000101068 (ENSGALG00000047530)	ENSGALT00000092139 (ENSGALG00000052001)
Ovary	ENSGALT00000101967 (NUDT21)	ENSGALT00000004848 (OGFOD1)
Ovary	ENSGALT00000087605 (FAAP24)	ENSGALT00000007588 (CEP89)
Ovary	ENSGALT00000051074 (CEBPG)	ENSGALT00000007832 (PEPD)
Ovary	ENSGALT00000007842 (CHST8)	ENSGALT00000094137 (ENSGALG00000047692)
Ovary	ENSGALT00000105802 (HAS3)	ENSGALT00000058298 (CHTF8)
Ovary	ENSGALT00000091496 (UTP4)	ENSGALT00000058298 (CHTF8)
Ovary	ENSGALT00000088365 (UTP4)	ENSGALT00000058298 (CHTF8)
Ovary	ENSGALT00000086207 (UTP4)	ENSGALT00000058298 (CHTF8)
Ovary	ENSGALT00000003917 (RNF123)	ENSGALT00000105582 (AMIGO3)
Ovary	ENSGALT00000089067 (EMC3)	ENSGALT00000005906 (FANCD2)
Ovary	ENSGALT00000047782 (TSEN2)	ENSGALT00000043832 (MKRN2OS)
Ovary	ENSGALT00000101309 (MGLL)	ENSGALT00000092328 (ENSGALG00000051867)
Ovary	ENSGALT00000091818 (DALRD3)	ENSGALT00000100367 (WDR6)
Ovary	ENSGALT00000098062 (DALRD3)	ENSGALT00000100367 (WDR6)
Ovary	ENSGALT00000072433 (DALRD3)	ENSGALT00000100367 (WDR6)
Ovary	ENSGALT00000101948 (DALRD3)	ENSGALT00000100367 (WDR6)
Ovary	ENSGALT00000011252 (ENSGALG00000006944)	ENSGALT00000011237 (P4HTM)
Ovary	ENSGALT00000087976 (SLC25A26)	ENSGALT00000036226 (LRIG1)
Ovary	ENSGALT00000044150 (INSYN2B)	ENSGALT00000003239 (DOCK2)
Ovary	ENSGALT00000072016 (SFXN1)	ENSGALT00000049695 (DRD1)
Ovary	ENSGALT00000082236 (HNRNPH2)	ENSGALT00000009585 (DGUOK)
Ovary	ENSGALT00000092558 (ENSGALG00000049485)	ENSGALT00000005611 (BAIAP2L1)
Ovary	ENSGALT00000006456 (GPR146)	ENSGALT00000103266 (C7orf50)
Ovary	ENSGALT00000071421 (GPR146)	ENSGALT00000103266 (C7orf50)
Ovary	ENSGALT00000102216 (ENSGALG00000050332)	ENSGALT00000103266 (C7orf50)
Ovary	ENSGALT00000006465 (GPER1)	ENSGALT00000103266 (C7orf50)
Ovary	ENSGALT00000008150 (SLC5A10)	ENSGALT00000008158 (FAM83G)
Ovary	ENSGALT00000095347 (EPN2)	ENSGALT00000008174 (B9D1)
Ovary	ENSGALT00000008486 (GNG13)	ENSGALT00000057565 (CHTF18)
Ovary	ENSGALT00000105945 (GNPTG)	ENSGALT00000010385 (TSR3)
Ovary	ENSGALT00000091140 (GPRC5B)	ENSGALT00000045802 (IQCK)
Ovary	ENSGALT00000106881 (LYRM1)	ENSGALT00000080718 (DCUN1D3)
Ovary	ENSGALT00000100299 (ENSGALG00000046685)	ENSGALT00000098431 (ENSGALG00000050166)
Ovary	ENSGALT00000104374 (MRPL40)	ENSGALT00000077327 (HIRA)
Ovary	ENSGALT00000098425 (COMT)	ENSGALT00000107088 (TXNRD2)
Ovary	ENSGALT00000047083 (ORAI1)	ENSGALT00000098989 (ENSGALG00000053228)
Ovary	ENSGALT00000010857 (RSPH14)	ENSGALT00000010871 (GNAZ)
Ovary	ENSGALT00000107218 (ENSGALG00000052820)	ENSGALT00000104397 (EMID1)
Ovary	ENSGALT00000104621 (ENSGALG00000053730)	ENSGALT00000046723 (ENSGALG00000049208)
Ovary	ENSGALT00000091250 (ENSGALG00000047380)	ENSGALT00000046723 (ENSGALG00000049208)
Ovary	ENSGALT00000091078 (ENSGALG00000047380)	ENSGALT00000046723 (ENSGALG00000049208)
Ovary	ENSGALT00000093071 (ENSGALG00000047380)	ENSGALT00000046723 (ENSGALG00000049208)
Ovary	ENSGALT00000093088 (ENSGALG00000047380)	ENSGALT00000046723 (ENSGALG00000049208)
[truncated: 764 more rows]

## Sheet: Co-Expressed H2H Pairs
Supplemental Table 4: H2H Co-Expressed Transcript Pairs
Cell Type	Chromosome (#1)	Strand (#1)	TSS (#1)	Transcript ID (#1)	Biotype (#1)	Chromosome (#2)	Strand (#2)	TSS (#2)	Transcript ID (#2)	Biotype (#2)	Tissue-Specific
B Cell	chr1	+	28571392	ENSGALT00000015456	protein_coding	chr1	-	28571188	ENSGALT00000044409	protein_coding	NO
B Cell	chr1	+	29702685	ENSGALT00000073496	protein_coding	chr1	-	29702640	ENSGALT00000015532	protein_coding	NO
B Cell	chr1	+	33914415	ENSGALT00000016033	protein_coding	chr1	-	33913536	ENSGALT00000016025	protein_coding	NO
B Cell	chr1	+	45470195	ENSGALT00000018529	protein_coding	chr1	-	45469802	ENSGALT00000018508	protein_coding	NO
B Cell	chr1	+	50979470	ENSGALT00000108327	protein_coding	chr1	-	50979138	ENSGALT00000020063	protein_coding	NO
B Cell	chr1	+	50979470	ENSGALT00000108327	protein_coding	chr1	-	50978886	ENSGALT00000093539	protein_coding	NO
B Cell	chr1	+	50979694	ENSGALT00000020069	protein_coding	chr1	-	50979138	ENSGALT00000020063	protein_coding	NO
B Cell	chr1	+	50979694	ENSGALT00000020069	protein_coding	chr1	-	50978886	ENSGALT00000093539	protein_coding	NO
B Cell	chr1	+	71309070	ENSGALT00000062802	protein_coding	chr1	-	71308797	ENSGALT00000102264	protein_coding	NO
B Cell	chr1	+	90035288	ENSGALT00000036874	protein_coding	chr1	-	90034767	ENSGALT00000081476	protein_coding	NO
B Cell	chr1	+	108342782	ENSGALT00000103367	protein_coding	chr1	-	108342302	ENSGALT00000101896	protein_coding	NO
B Cell	chr1	+	119665839	ENSGALT00000064964	protein_coding	chr1	-	119666014	ENSGALT00000026357	protein_coding	NO
B Cell	chr1	+	133813721	ENSGALT00000063432	protein_coding	chr1	-	133813733	ENSGALT00000027060	protein_coding	NO
B Cell	chr1	+	168950858	ENSGALT00000071429	protein_coding	chr1	-	168950766	ENSGALT00000036491	protein_coding	NO
B Cell	chr1	+	181650845	ENSGALT00000080652	protein_coding	chr1	-	181650668	ENSGALT00000027713	protein_coding	NO
B Cell	chr1	+	194375024	ENSGALT00000057974	protein_coding	chr1	-	194374696	ENSGALT00000066015	protein_coding	NO
B Cell	chr1	+	194375024	ENSGALT00000057974	protein_coding	chr1	-	194374727	ENSGALT00000060312	protein_coding	NO
B Cell	chr1	+	387735	ENSGALT00000105424	protein_coding	chr1	-	387604	ENSGALT00000082348	protein_coding	NO
B Cell	chr1	+	1103222	ENSGALT00000050474	protein_coding	chr1	-	1102807	ENSGALT00000056542	protein_coding	NO
B Cell	chr1	+	1291723	ENSGALT00000097738	protein_coding	chr1	-	1291147	ENSGALT00000080406	protein_coding	NO
B Cell	chr1	+	1544376	ENSGALT00000093249	protein_coding	chr1	-	1544020	ENSGALT00000012992	protein_coding	NO
B Cell	chr1	+	1544394	ENSGALT00000013005	protein_coding	chr1	-	1544020	ENSGALT00000012992	protein_coding	NO
B Cell	chr1	+	4815822	ENSGALT00000059202	protein_coding	chr1	-	4815768	ENSGALT00000065471	protein_coding	NO
B Cell	chr1	+	4815836	ENSGALT00000085346	protein_coding	chr1	-	4815768	ENSGALT00000065471	protein_coding	NO
B Cell	chr1	+	12642780	ENSGALT00000013557	protein_coding	chr1	-	12642425	ENSGALT00000013567	protein_coding	NO
B Cell	chr1	+	13132813	ENSGALT00000087665	protein_coding	chr1	-	13132568	ENSGALT00000013428	protein_coding	NO
B Cell	chr1	+	14881060	ENSGALT00000039460	protein_coding	chr1	-	14881357	ENSGALT00000068162	protein_coding	NO
B Cell	chr1	+	15407885	ENSGALT00000054844	protein_coding	chr1	-	15407388	ENSGALT00000082360	protein_coding	YES
B Cell	chr1	+	15825373	ENSGALT00000021255	protein_coding	chr1	-	15825318	ENSGALT00000070013	protein_coding	NO
B Cell	chr1	+	19045086	ENSGALT00000013929	protein_coding	chr1	-	19044605	ENSGALT00000061619	protein_coding	NO
B Cell	chr1	+	19045086	ENSGALT00000013929	protein_coding	chr1	-	19044612	ENSGALT00000013914	protein_coding	NO
B Cell	chr1	+	30191198	ENSGALT00000015615	protein_coding	chr1	-	30190843	ENSGALT00000015605	protein_coding	NO
B Cell	chr1	+	31563283	ENSGALT00000015861	protein_coding	chr1	-	31563241	ENSGALT00000015853	protein_coding	NO
B Cell	chr1	+	33726766	ENSGALT00000015988	protein_coding	chr1	-	33726148	ENSGALT00000015981	protein_coding	NO
B Cell	chr1	+	46718129	ENSGALT00000038231	protein_coding	chr1	-	46717148	ENSGALT00000093522	protein_coding	NO
B Cell	chr1	+	46718129	ENSGALT00000038231	protein_coding	chr1	-	46717138	ENSGALT00000046169	protein_coding	NO
B Cell	chr1	+	48087184	ENSGALT00000073766	protein_coding	chr1	-	48086884	ENSGALT00000058977	protein_coding	NO
B Cell	chr1	+	48095103	ENSGALT00000070686	protein_coding	chr1	-	48096067	ENSGALT00000073535	protein_coding	NO
B Cell	chr1	+	48102059	ENSGALT00000105242	protein_coding	chr1	-	48101764	ENSGALT00000045162	protein_coding	NO
B Cell	chr1	+	48129285	ENSGALT00000081149	protein_coding	chr1	-	48130279	ENSGALT00000079743	protein_coding	NO
B Cell	chr1	+	48153913	ENSGALT00000043224	protein_coding	chr1	-	48153627	ENSGALT00000108326	protein_coding	NO
B Cell	chr1	+	48160178	ENSGALT00000042841	protein_coding	chr1	-	48159885	ENSGALT00000095522	protein_coding	NO
B Cell	chr1	+	48170394	ENSGALT00000092743	protein_coding	chr1	-	48170081	ENSGALT00000046827	protein_coding	NO
B Cell	chr1	+	48175635	ENSGALT00000049616	protein_coding	chr1	-	48175348	ENSGALT00000090832	protein_coding	NO
B Cell	chr1	+	49571825	ENSGALT00000091419	protein_coding	chr1	-	49571511	ENSGALT00000037980	protein_coding	NO
B Cell	chr1	+	49629137	ENSGALT00000019497	protein_coding	chr1	-	49628904	ENSGALT00000019494	protein_coding	NO
B Cell	chr1	+	49906354	ENSGALT00000019595	protein_coding	chr1	-	49906124	ENSGALT00000019589	protein_coding	NO
B Cell	chr1	+	51511485	ENSGALT00000020401	protein_coding	chr1	-	51511452	ENSGALT00000086116	protein_coding	NO
B Cell	chr1	+	54703830	ENSGALT00000068252	protein_coding	chr1	-	54704028	ENSGALT00000052099	protein_coding	NO
B Cell	chr1	+	56771258	ENSGALT00000020960	protein_coding	chr1	-	56771091	ENSGALT00000020957	protein_coding	NO
B Cell	chr1	+	61798693	ENSGALT00000021282	protein_coding	chr1	-	61799223	ENSGALT00000021281	protein_coding	NO
B Cell	chr1	+	61860008	ENSGALT00000094657	protein_coding	chr1	-	61860517	ENSGALT00000021284	protein_coding	NO
B Cell	chr1	+	61860008	ENSGALT00000094657	protein_coding	chr1	-	61860432	ENSGALT00000101905	protein_coding	YES
B Cell	chr1	+	65337340	ENSGALT00000060053	protein_coding	chr1	-	65337020	ENSGALT00000021517	protein_coding	NO
B Cell	chr1	+	68016635	ENSGALT00000044701	protein_coding	chr1	-	68015655	ENSGALT00000099270	protein_coding	NO
B Cell	chr1	+	68016635	ENSGALT00000044701	protein_coding	chr1	-	68015987	ENSGALT00000048877	protein_coding	NO
B Cell	chr1	+	71309055	ENSGALT00000060327	protein_coding	chr1	-	71308797	ENSGALT00000102264	protein_coding	NO
B Cell	chr1	+	71309078	ENSGALT00000054558	protein_coding	chr1	-	71308797	ENSGALT00000102264	protein_coding	NO
B Cell	chr1	+	73358185	ENSGALT00000027944	protein_coding	chr1	-	73358098	ENSGALT00000104609	protein_coding	NO
B Cell	chr1	+	77463746	ENSGALT00000023289	protein_coding	chr1	-	77464115	ENSGALT00000084532	protein_coding	NO
B Cell	chr1	+	77588151	ENSGALT00000042566	protein_coding	chr1	-	77587396	ENSGALT00000023314	protein_coding	NO
B Cell	chr1	+	78020565	ENSGALT00000023493	protein_coding	chr1	-	78020461	ENSGALT00000023492	protein_coding	NO
B Cell	chr1	+	79906672	ENSGALT00000023883	protein_coding	chr1	-	79906621	ENSGALT00000023879	protein_coding	NO
B Cell	chr1	+	79906678	ENSGALT00000094740	protein_coding	chr1	-	79906621	ENSGALT00000023879	protein_coding	NO
B Cell	chr1	+	79997431	ENSGALT00000060423	protein_coding	chr1	-	79997334	ENSGALT00000092406	protein_coding	NO
B Cell	chr1	+	80019463	ENSGALT00000071723	protein_coding	chr1	-	80019083	ENSGALT00000096999	protein_coding	NO
B Cell	chr1	+	80556279	ENSGALT00000024115	protein_coding	chr1	-	80556121	ENSGALT00000074438	protein_coding	NO
B Cell	chr1	+	84701317	ENSGALT00000024530	protein_coding	chr1	-	84700553	ENSGALT00000090956	protein_coding	NO
B Cell	chr1	+	84810189	ENSGALT00000024577	protein_coding	chr1	-	84810188	ENSGALT00000024570	protein_coding	NO
B Cell	chr1	+	84810189	ENSGALT00000024577	protein_coding	chr1	-	84810151	ENSGALT00000107061	protein_coding	NO
B Cell	chr1	+	85946021	ENSGALT00000024650	protein_coding	chr1	-	85945887	ENSGALT00000100753	protein_coding	NO
B Cell	chr1	+	86009786	ENSGALT00000024674	protein_coding	chr1	-	86010298	ENSGALT00000024670	protein_coding	NO
B Cell	chr1	+	86432579	ENSGALT00000024742	protein_coding	chr1	-	86432550	ENSGALT00000024741	protein_coding	NO
B Cell	chr1	+	86473465	ENSGALT00000100800	protein_coding	chr1	-	86473519	ENSGALT00000083617	protein_coding	NO
B Cell	chr1	+	87881610	ENSGALT00000105936	protein_coding	chr1	-	87881272	ENSGALT00000024772	protein_coding	NO
B Cell	chr1	+	88748621	ENSGALT00000094520	protein_coding	chr1	-	88749184	ENSGALT00000024781	protein_coding	NO
B Cell	chr1	+	103860752	ENSGALT00000025419	protein_coding	chr1	-	103860617	ENSGALT00000063486	protein_coding	NO
B Cell	chr1	+	109333196	ENSGALT00000025891	protein_coding	chr1	-	109332889	ENSGALT00000086149	protein_coding	NO
B Cell	chr1	+	110902175	ENSGALT00000036704	protein_coding	chr1	-	110902129	ENSGALT00000026088	protein_coding	NO
B Cell	chr1	+	110902259	ENSGALT00000068933	protein_coding	chr1	-	110902129	ENSGALT00000026088	protein_coding	NO
B Cell	chr1	+	111336045	ENSGALT00000049988	protein_coding	chr1	-	111335748	ENSGALT00000026119	protein_coding	NO
B Cell	chr1	+	122843956	ENSGALT00000026701	protein_coding	chr1	-	122843890	ENSGALT00000026700	protein_coding	NO
B Cell	chr1	+	123713869	ENSGALT00000026744	protein_coding	chr1	-	123713845	ENSGALT00000026743	protein_coding	NO
B Cell	chr1	+	124337729	ENSGALT00000107403	protein_coding	chr1	-	124337655	ENSGALT00000026755	protein_coding	NO
B Cell	chr1	+	131359737	ENSGALT00000026979	protein_coding	chr1	-	131358862	ENSGALT00000026974	protein_coding	NO
B Cell	chr1	+	131359737	ENSGALT00000026979	protein_coding	chr1	-	131358996	ENSGALT00000092560	protein_coding	NO
B Cell	chr1	+	133610585	ENSGALT00000064380	protein_coding	chr1	-	133610582	ENSGALT00000064247	protein_coding	NO
B Cell	chr1	+	133610585	ENSGALT00000064380	protein_coding	chr1	-	133610545	ENSGALT00000097638	protein_coding	NO
B Cell	chr1	+	133860170	ENSGALT00000027066	protein_coding	chr1	-	133859438	ENSGALT00000082985	protein_coding	NO
B Cell	chr1	+	138198426	ENSGALT00000045618	protein_coding	chr1	-	138198192	ENSGALT00000027142	protein_coding	NO
B Cell	chr1	+	138304484	ENSGALT00000099286	protein_coding	chr1	-	138303644	ENSGALT00000027148	protein_coding	NO
B Cell	chr1	+	138890967	ENSGALT00000027172	protein_coding	chr1	-	138890288	ENSGALT00000027171	protein_coding	NO
B Cell	chr1	+	140545199	ENSGALT00000049451	protein_coding	chr1	-	140546009	ENSGALT00000093925	protein_coding	NO
B Cell	chr1	+	141655788	ENSGALT00000027230	protein_coding	chr1	-	141655263	ENSGALT00000027229	protein_coding	NO
B Cell	chr1	+	141655788	ENSGALT00000027230	protein_coding	chr1	-	141655299	ENSGALT00000084711	protein_coding	NO
B Cell	chr1	+	146744937	ENSGALT00000104250	protein_coding	chr1	-	146744321	ENSGALT00000027292	protein_coding	YES
B Cell	chr1	+	147878337	ENSGALT00000027315	protein_coding	chr1	-	147878330	ENSGALT00000069826	protein_coding	NO
B Cell	chr1	+	167168759	ENSGALT00000027397	protein_coding	chr1	-	167169083	ENSGALT00000027391	protein_coding	NO
B Cell	chr1	+	170527077	ENSGALT00000027470	protein_coding	chr1	-	170526727	ENSGALT00000027469	protein_coding	NO
B Cell	chr1	+	170527593	ENSGALT00000101677	protein_coding	chr1	-	170526727	ENSGALT00000027469	protein_coding	NO
B Cell	chr1	+	171734631	ENSGALT00000027510	protein_coding	chr1	-	171734808	ENSGALT00000027509	protein_coding	NO
B Cell	chr1	+	173700750	ENSGALT00000027546	protein_coding	chr1	-	173700689	ENSGALT00000061853	protein_coding	NO
B Cell	chr1	+	173700750	ENSGALT00000027546	protein_coding	chr1	-	173699784	ENSGALT00000106619	protein_coding	NO
B Cell	chr1	+	179931544	ENSGALT00000078792	protein_coding	chr1	-	179931454	ENSGALT00000079929	protein_coding	NO
B Cell	chr1	+	186935468	ENSGALT00000105464	protein_coding	chr1	-	186935320	ENSGALT00000098627	protein_coding	NO
B Cell	chr1	+	186935468	ENSGALT00000105464	protein_coding	chr1	-	186935262	ENSGALT00000027818	protein_coding	NO
B Cell	chr1	+	190327815	ENSGALT00000000097	protein_coding	chr1	-	190326959	ENSGALT00000078788	protein_coding	NO
B Cell	chr1	+	195602593	ENSGALT00000031356	protein_coding	chr1	-	195602075	ENSGALT00000001279	protein_coding	NO
B Cell	chr1	+	197076797	ENSGALT00000042853	protein_coding	chr1	-	197076757	ENSGALT00000100262	protein_coding	NO
B Cell	chr1	+	197438848	ENSGALT00000069125	protein_coding	chr1	-	197438520	ENSGALT00000071933	protein_coding	NO
B Cell	chr1	+	197467874	ENSGALT00000081529	protein_coding	chr1	-	197467585	ENSGALT00000091172	protein_coding	NO
B Cell	chr2	+	69168718	ENSGALT00000043783	protein_coding	chr2	-	69168662	ENSGALT00000021053	protein_coding	NO
B Cell	chr2	+	108001949	ENSGALT00000021064	protein_coding	chr2	-	108001222	ENSGALT00000084200	protein_coding	NO
B Cell	chr2	+	115326114	ENSGALT00000107024	protein_coding	chr2	-	115326952	ENSGALT00000076291	protein_coding	NO
B Cell	chr2	+	3930911	ENSGALT00000061514	protein_coding	chr2	-	3930331	ENSGALT00000088587	protein_coding	NO
B Cell	chr2	+	3930911	ENSGALT00000061514	protein_coding	chr2	-	3930891	ENSGALT00000096490	protein_coding	NO
B Cell	chr2	+	16116858	ENSGALT00000012230	protein_coding	chr2	-	16116800	ENSGALT00000012224	protein_coding	NO
B Cell	chr2	+	16116928	ENSGALT00000046640	protein_coding	chr2	-	16116800	ENSGALT00000012224	protein_coding	NO
B Cell	chr2	+	22533863	ENSGALT00000050703	protein_coding	chr2	-	22533249	ENSGALT00000064684	protein_coding	NO
B Cell	chr2	+	22674891	ENSGALT00000015413	protein_coding	chr2	-	22674871	ENSGALT00000015329	protein_coding	NO
B Cell	chr2	+	64612877	ENSGALT00000031045	protein_coding	chr2	-	64612033	ENSGALT00000020877	protein_coding	NO
B Cell	chr2	+	64612877	ENSGALT00000031045	protein_coding	chr2	-	64612733	ENSGALT00000104803	protein_coding	NO
B Cell	chr2	+	89253789	ENSGALT00000021930	protein_coding	chr2	-	89253599	ENSGALT00000030979	protein_coding	NO
B Cell	chr2	+	96599126	ENSGALT00000022517	protein_coding	chr2	-	96598993	ENSGALT00000022519	protein_coding	NO
B Cell	chr2	+	96599224	ENSGALT00000105136	protein_coding	chr2	-	96598993	ENSGALT00000022519	protein_coding	NO
B Cell	chr2	+	114804765	ENSGALT00000048631	protein_coding	chr2	-	114803982	ENSGALT00000052610	protein_coding	NO
B Cell	chr2	+	127396673	ENSGALT00000063766	protein_coding	chr2	-	127396452	ENSGALT00000083830	protein_coding	NO
B Cell	chr2	+	130889826	ENSGALT00000068403	protein_coding	chr2	-	130889647	ENSGALT00000096985	protein_coding	NO
B Cell	chr2	+	138725193	ENSGALT00000055647	protein_coding	chr2	-	138724604	ENSGALT00000061378	protein_coding	NO
B Cell	chr2	+	2440970	ENSGALT00000048999	protein_coding	chr2	-	2440924	ENSGALT00000008560	protein_coding	NO
B Cell	chr2	+	2440970	ENSGALT00000048999	protein_coding	chr2	-	2440917	ENSGALT00000053929	protein_coding	NO
B Cell	chr2	+	3303810	ENSGALT00000008701	protein_coding	chr2	-	3304412	ENSGALT00000103352	protein_coding	NO
B Cell	chr2	+	3303810	ENSGALT00000008701	protein_coding	chr2	-	3303730	ENSGALT00000094713	protein_coding	NO
B Cell	chr2	+	7910367	ENSGALT00000028082	protein_coding	chr2	-	7909517	ENSGALT00000099900	protein_coding	YES
B Cell	chr2	+	15396236	ENSGALT00000052334	protein_coding	chr2	-	15395461	ENSGALT00000063763	protein_coding	NO
B Cell	chr2	+	15396448	ENSGALT00000060658	protein_coding	chr2	-	15395461	ENSGALT00000063763	protein_coding	NO
B Cell	chr2	+	20619978	ENSGALT00000031228	protein_coding	chr2	-	20619613	ENSGALT00000014298	protein_coding	NO
B Cell	chr2	+	20619978	ENSGALT00000031228	protein_coding	chr2	-	20619606	ENSGALT00000107434	protein_coding	NO
B Cell	chr2	+	24794126	ENSGALT00000037997	protein_coding	chr2	-	24793994	ENSGALT00000017404	protein_coding	NO
B Cell	chr2	+	28476109	ENSGALT00000052603	protein_coding	chr2	-	28475977	ENSGALT00000017566	protein_coding	NO
B Cell	chr2	+	32194365	ENSGALT00000065275	protein_coding	chr2	-	32194797	ENSGALT00000090968	protein_coding	NO
B Cell	chr2	+	32194365	ENSGALT00000065275	protein_coding	chr2	-	32194928	ENSGALT00000089553	protein_coding	NO
B Cell	chr2	+	32194365	ENSGALT00000065275	protein_coding	chr2	-	32193776	ENSGALT00000098616	protein_coding	NO
B Cell	chr2	+	32195036	ENSGALT00000069399	protein_coding	chr2	-	32194797	ENSGALT00000090968	protein_coding	NO
B Cell	chr2	+	32195036	ENSGALT00000069399	protein_coding	chr2	-	32194928	ENSGALT00000089553	protein_coding	NO
B Cell	chr2	+	32195054	ENSGALT00000017979	protein_coding	chr2	-	32194797	ENSGALT00000090968	protein_coding	NO
B Cell	chr2	+	32195054	ENSGALT00000017979	protein_coding	chr2	-	32194928	ENSGALT00000089553	protein_coding	NO
B Cell	chr2	+	33920265	ENSGALT00000018238	protein_coding	chr2	-	33919576	ENSGALT00000018231	protein_coding	NO
B Cell	chr2	+	34296807	ENSGALT00000069397	protein_coding	chr2	-	34296747	ENSGALT00000018327	protein_coding	NO
B Cell	chr2	+	37133709	ENSGALT00000065593	protein_coding	chr2	-	37133561	ENSGALT00000018418	protein_coding	NO
B Cell	chr2	+	37133748	ENSGALT00000066755	protein_coding	chr2	-	37133561	ENSGALT00000018418	protein_coding	NO
B Cell	chr2	+	41350204	ENSGALT00000102095	protein_coding	chr2	-	41350778	ENSGALT00000065313	protein_coding	NO
B Cell	chr2	+	41350592	ENSGALT00000081699	protein_coding	chr2	-	41350778	ENSGALT00000065313	protein_coding	NO
B Cell	chr2	+	41350978	ENSGALT00000082999	protein_coding	chr2	-	41350778	ENSGALT00000065313	protein_coding	NO
B Cell	chr2	+	42275735	ENSGALT00000066702	protein_coding	chr2	-	42275377	ENSGALT00000054111	protein_coding	NO
B Cell	chr2	+	43070480	ENSGALT00000092646	protein_coding	chr2	-	43070368	ENSGALT00000055565	protein_coding	NO
B Cell	chr2	+	43164072	ENSGALT00000078606	protein_coding	chr2	-	43164052	ENSGALT00000058182	protein_coding	NO
B Cell	chr2	+	44772952	ENSGALT00000070690	protein_coding	chr2	-	44772484	ENSGALT00000103320	protein_coding	NO
B Cell	chr2	+	51155640	ENSGALT00000065950	protein_coding	chr2	-	51155283	ENSGALT00000064599	protein_coding	NO
B Cell	chr2	+	55554624	ENSGALT00000058821	protein_coding	chr2	-	55554509	ENSGALT00000090074	protein_coding	NO
B Cell	chr2	+	56166283	ENSGALT00000067008	protein_coding	chr2	-	56166222	ENSGALT00000105673	protein_coding	NO
B Cell	chr2	+	56166288	ENSGALT00000107798	protein_coding	chr2	-	56166222	ENSGALT00000105673	protein_coding	NO
B Cell	chr2	+	56166387	ENSGALT00000084814	protein_coding	chr2	-	56166222	ENSGALT00000105673	protein_coding	NO
B Cell	chr2	+	60373606	ENSGALT00000031077	protein_coding	chr2	-	60373473	ENSGALT00000020698	protein_coding	NO
B Cell	chr2	+	62100859	ENSGALT00000020771	protein_coding	chr2	-	62100297	ENSGALT00000086256	protein_coding	NO
B Cell	chr2	+	65441109	ENSGALT00000104809	protein_coding	chr2	-	65440993	ENSGALT00000067412	protein_coding	NO
B Cell	chr2	+	65962922	ENSGALT00000102086	protein_coding	chr2	-	65962215	ENSGALT00000020904	protein_coding	NO
B Cell	chr2	+	78413930	ENSGALT00000103169	protein_coding	chr2	-	78413636	ENSGALT00000021286	protein_coding	NO
B Cell	chr2	+	79210862	ENSGALT00000046536	protein_coding	chr2	-	79211008	ENSGALT00000079280	protein_coding	NO
B Cell	chr2	+	85678765	ENSGALT00000092899	protein_coding	chr2	-	85678854	ENSGALT00000021508	protein_coding	NO
B Cell	chr2	+	85678952	ENSGALT00000051095	protein_coding	chr2	-	85678854	ENSGALT00000021508	protein_coding	NO
B Cell	chr2	+	88903233	ENSGALT00000021849	protein_coding	chr2	-	88902355	ENSGALT00000021845	protein_coding	NO
B Cell	chr2	+	89697617	ENSGALT00000022094	protein_coding	chr2	-	89697358	ENSGALT00000022088	protein_coding	NO
B Cell	chr2	+	90240951	ENSGALT00000085077	protein_coding	chr2	-	90240896	ENSGALT00000086884	protein_coding	NO
B Cell	chr2	+	97057240	ENSGALT00000022479	protein_coding	chr2	-	97057122	ENSGALT00000022485	protein_coding	NO
B Cell	chr2	+	97210278	ENSGALT00000022474	protein_coding	chr2	-	97210085	ENSGALT00000022445	protein_coding	NO
B Cell	chr2	+	97308618	ENSGALT00000022395	protein_coding	chr2	-	97308480	ENSGALT00000022420	protein_coding	NO
B Cell	chr2	+	97308619	ENSGALT00000078414	protein_coding	chr2	-	97308480	ENSGALT00000022420	protein_coding	NO
B Cell	chr2	+	98466593	ENSGALT00000049790	protein_coding	chr2	-	98467538	ENSGALT00000033559	protein_coding	NO
B Cell	chr2	+	101191145	ENSGALT00000060795	protein_coding	chr2	-	101191007	ENSGALT00000023897	protein_coding	NO
B Cell	chr2	+	106324489	ENSGALT00000075249	protein_coding	chr2	-	106324274	ENSGALT00000024463	protein_coding	NO
B Cell	chr2	+	117730665	ENSGALT00000054535	protein_coding	chr2	-	117729838	ENSGALT00000084525	protein_coding	NO
B Cell	chr2	+	117730665	ENSGALT00000054535	protein_coding	chr2	-	117730489	ENSGALT00000066511	protein_coding	NO
B Cell	chr2	+	118027529	ENSGALT00000068732	protein_coding	chr2	-	118026920	ENSGALT00000065415	protein_coding	NO
B Cell	chr2	+	122624566	ENSGALT00000071192	protein_coding	chr2	-	122624259	ENSGALT00000095935	protein_coding	NO
B Cell	chr2	+	122624566	ENSGALT00000071192	protein_coding	chr2	-	122624238	ENSGALT00000094309	protein_coding	NO
B Cell	chr2	+	122624566	ENSGALT00000071192	protein_coding	chr2	-	122624505	ENSGALT00000092993	protein_coding	NO
B Cell	chr2	+	123049324	ENSGALT00000059786	protein_coding	chr2	-	123049268	ENSGALT00000060565	protein_coding	NO
B Cell	chr2	+	129063964	ENSGALT00000080698	protein_coding	chr2	-	129064019	ENSGALT00000057246	protein_coding	NO
B Cell	chr2	+	129309737	ENSGALT00000065707	protein_coding	chr2	-	129309973	ENSGALT00000048847	protein_coding	NO
B Cell	chr2	+	130680374	ENSGALT00000108160	protein_coding	chr2	-	130679919	ENSGALT00000098810	protein_coding	NO
B Cell	chr2	+	132219872	ENSGALT00000104451	protein_coding	chr2	-	132219771	ENSGALT00000087979	protein_coding	NO
B Cell	chr2	+	132219872	ENSGALT00000104451	protein_coding	chr2	-	132219750	ENSGALT00000067713	protein_coding	NO
B Cell	chr2	+	132547319	ENSGALT00000106268	protein_coding	chr2	-	132547557	ENSGALT00000082785	protein_coding	NO
B Cell	chr2	+	137916481	ENSGALT00000066369	protein_coding	chr2	-	137916249	ENSGALT00000068073	protein_coding	NO
B Cell	chr2	+	138488837	ENSGALT00000048868	protein_coding	chr2	-	138488802	ENSGALT00000063975	protein_coding	NO
B Cell	chr3	+	10612670	ENSGALT00000093476	protein_coding	chr3	-	10612508	ENSGALT00000098139	protein_coding	NO
B Cell	chr3	+	17672117	ENSGALT00000015173	protein_coding	chr3	-	17672077	ENSGALT00000066400	protein_coding	NO
B Cell	chr3	+	25620461	ENSGALT00000061391	protein_coding	chr3	-	25620190	ENSGALT00000016222	protein_coding	NO
B Cell	chr3	+	27055514	ENSGALT00000068038	protein_coding	chr3	-	27055287	ENSGALT00000051293	protein_coding	NO
B Cell	chr3	+	27055598	ENSGALT00000016274	protein_coding	chr3	-	27055287	ENSGALT00000051293	protein_coding	NO
B Cell	chr3	+	32108927	ENSGALT00000017183	protein_coding	chr3	-	32108985	ENSGALT00000104722	protein_coding	NO
B Cell	chr3	+	41241477	ENSGALT00000058117	protein_coding	chr3	-	41241039	ENSGALT00000018251	protein_coding	NO
B Cell	chr3	+	52558945	ENSGALT00000031785	protein_coding	chr3	-	52558882	ENSGALT00000022374	protein_coding	NO
B Cell	chr3	+	66086796	ENSGALT00000024245	protein_coding	chr3	-	66086186	ENSGALT00000095682	protein_coding	NO
B Cell	chr3	+	66086796	ENSGALT00000024245	protein_coding	chr3	-	66086788	ENSGALT00000093629	protein_coding	NO
B Cell	chr3	+	66317648	ENSGALT00000103924	protein_coding	chr3	-	66318181	ENSGALT00000024260	protein_coding	YES
B Cell	chr3	+	96190999	ENSGALT00000026493	protein_coding	chr3	-	96190814	ENSGALT00000082086	protein_coding	NO
B Cell	chr3	+	96190999	ENSGALT00000026493	protein_coding	chr3	-	96191112	ENSGALT00000061757	protein_coding	NO
B Cell	chr3	+	96190999	ENSGALT00000026493	protein_coding	chr3	-	96191001	ENSGALT00000078745	protein_coding	NO
B Cell	chr3	+	88894	ENSGALT00000096678	protein_coding	chr3	-	88773	ENSGALT00000049515	protein_coding	NO
B Cell	chr3	+	2124833	ENSGALT00000012708	protein_coding	chr3	-	2124498	ENSGALT00000012717	protein_coding	NO
B Cell	chr3	+	3041078	ENSGALT00000043204	protein_coding	chr3	-	3041396	ENSGALT00000013285	protein_coding	NO
B Cell	chr3	+	3092526	ENSGALT00000040123	protein_coding	chr3	-	3092030	ENSGALT00000013347	protein_coding	NO
B Cell	chr3	+	4365990	ENSGALT00000091109	protein_coding	chr3	-	4365845	ENSGALT00000013999	protein_coding	NO
B Cell	chr3	+	9237776	ENSGALT00000014608	protein_coding	chr3	-	9237768	ENSGALT00000072088	protein_coding	NO
B Cell	chr3	+	11863402	ENSGALT00000014804	protein_coding	chr3	-	11863372	ENSGALT00000039435	protein_coding	NO
B Cell	chr3	+	11969796	ENSGALT00000014234	protein_coding	chr3	-	11969604	ENSGALT00000031978	protein_coding	NO
B Cell	chr3	+	11969796	ENSGALT00000014234	protein_coding	chr3	-	11969571	ENSGALT00000093478	protein_coding	NO
B Cell	chr3	+	13717147	ENSGALT00000014663	protein_coding	chr3	-	13716976	ENSGALT00000014668	protein_coding	NO
B Cell	chr3	+	15499039	ENSGALT00000014209	protein_coding	chr3	-	15498846	ENSGALT00000014238	protein_coding	NO
B Cell	chr3	+	15568555	ENSGALT00000033264	protein_coding	chr3	-	15568643	ENSGALT00000076330	protein_coding	NO
B Cell	chr3	+	16516835	ENSGALT00000038969	protein_coding	chr3	-	16516696	ENSGALT00000038984	protein_coding	YES
B Cell	chr3	+	18103700	ENSGALT00000038630	protein_coding	chr3	-	18103577	ENSGALT00000015332	protein_coding	NO
B Cell	chr3	+	18912039	ENSGALT00000038566	protein_coding	chr3	-	18911924	ENSGALT00000089666	protein_coding	NO
B Cell	chr3	+	21899748	ENSGALT00000038479	protein_coding	chr3	-	21899753	ENSGALT00000031933	protein_coding	NO
B Cell	chr3	+	21899748	ENSGALT00000038479	protein_coding	chr3	-	21899750	ENSGALT00000089326	protein_coding	NO
B Cell	chr3	+	26873799	ENSGALT00000016264	protein_coding	chr3	-	26873744	ENSGALT00000067583	protein_coding	NO
B Cell	chr3	+	27919746	ENSGALT00000016329	protein_coding	chr3	-	27919436	ENSGALT00000038269	protein_coding	NO
B Cell	chr3	+	31002022	ENSGALT00000048450	protein_coding	chr3	-	31001851	ENSGALT00000081279	protein_coding	NO
B Cell	chr3	+	31002063	ENSGALT00000016835	protein_coding	chr3	-	31001851	ENSGALT00000081279	protein_coding	NO
B Cell	chr3	+	31034154	ENSGALT00000050796	protein_coding	chr3	-	31034043	ENSGALT00000087128	protein_coding	NO
B Cell	chr3	+	33634879	ENSGALT00000017260	protein_coding	chr3	-	33634859	ENSGALT00000066488	protein_coding	NO
B Cell	chr3	+	33961963	ENSGALT00000091964	protein_coding	chr3	-	33961883	ENSGALT00000017313	protein_coding	YES
B Cell	chr3	+	39848254	ENSGALT00000076078	protein_coding	chr3	-	39848234	ENSGALT00000018018	protein_coding	NO
B Cell	chr3	+	40180104	ENSGALT00000018087	protein_coding	chr3	-	40180002	ENSGALT00000018081	protein_coding	NO
B Cell	chr3	+	40804437	ENSGALT00000018217	protein_coding	chr3	-	40804348	ENSGALT00000048479	protein_coding	NO
B Cell	chr3	+	45691776	ENSGALT00000019010	protein_coding	chr3	-	45691597	ENSGALT00000018992	protein_coding	NO
B Cell	chr3	+	45692504	ENSGALT00000028560	protein_coding	chr3	-	45691597	ENSGALT00000018992	protein_coding	NO
B Cell	chr3	+	45692527	ENSGALT00000093403	protein_coding	chr3	-	45691597	ENSGALT00000018992	protein_coding	YES
B Cell	chr3	+	52238875	ENSGALT00000093759	protein_coding	chr3	-	52238151	ENSGALT00000022333	protein_coding	NO
B Cell	chr3	+	68113915	ENSGALT00000106190	protein_coding	chr3	-	68113781	ENSGALT00000024753	protein_coding	NO
B Cell	chr3	+	75832003	ENSGALT00000045345	protein_coding	chr3	-	75832053	ENSGALT00000025447	protein_coding	NO
B Cell	chr3	+	76418281	ENSGALT00000025485	protein_coding	chr3	-	76418143	ENSGALT00000025477	protein_coding	NO
B Cell	chr3	+	77925880	ENSGALT00000096943	protein_coding	chr3	-	77925855	ENSGALT00000025556	protein_coding	NO
B Cell	chr3	+	81528331	ENSGALT00000025670	protein_coding	chr3	-	81527377	ENSGALT00000037065	protein_coding	NO
B Cell	chr3	+	81528331	ENSGALT00000025670	protein_coding	chr3	-	81527374	ENSGALT00000052653	protein_coding	NO
B Cell	chr3	+	93634554	ENSGALT00000026434	protein_coding	chr3	-	93634842	ENSGALT00000026430	protein_coding	NO
B Cell	chr3	+	104302068	ENSGALT00000026630	protein_coding	chr3	-	104301775	ENSGALT00000026627	protein_coding	NO
B Cell	chr3	+	104340994	ENSGALT00000026634	protein_coding	chr3	-	104340810	ENSGALT00000026633	protein_coding	NO
B Cell	chr3	+	104403224	ENSGALT00000026646	protein_coding	chr3	-	104402322	ENSGALT00000026641	protein_coding	NO
B Cell	chr3	+	104445654	ENSGALT00000026658	protein_coding	chr3	-	104445224	ENSGALT00000096654	protein_coding	NO
B Cell	chr3	+	104484250	ENSGALT00000106368	protein_coding	chr3	-	104484164	ENSGALT00000066965	protein_coding	NO
B Cell	chr3	+	105134510	ENSGALT00000026773	protein_coding	chr3	-	105133840	ENSGALT00000026768	protein_coding	NO
B Cell	chr3	+	105463856	ENSGALT00000026809	protein_coding	chr3	-	105463791	ENSGALT00000026808	protein_coding	NO
B Cell	chr3	+	108799742	ENSGALT00000026946	protein_coding	chr3	-	108799691	ENSGALT00000036701	protein_coding	NO
B Cell	chr4	+	4178762	ENSGALT00000009976	protein_coding	chr4	-	4178846	ENSGALT00000043721	protein_coding	NO
B Cell	chr4	+	73376532	ENSGALT00000048416	protein_coding	chr4	-	73376776	ENSGALT00000037357	protein_coding	NO
B Cell	chr4	+	73376861	ENSGALT00000096944	protein_coding	chr4	-	73376776	ENSGALT00000037357	protein_coding	NO
B Cell	chr4	+	44809822	ENSGALT00000077480	protein_coding	chr4	-	44809209	ENSGALT00000017682	protein_coding	NO
B Cell	chr4	+	44809822	ENSGALT00000077480	protein_coding	chr4	-	44809134	ENSGALT00000075031	protein_coding	NO
B Cell	chr4	+	44809830	ENSGALT00000017688	protein_coding	chr4	-	44809209	ENSGALT00000017682	protein_coding	NO
B Cell	chr4	+	44809830	ENSGALT00000017688	protein_coding	chr4	-	44809134	ENSGALT00000075031	protein_coding	NO
B Cell	chr4	+	79788885	ENSGALT00000075791	protein_coding	chr4	-	79788449	ENSGALT00000106419	protein_coding	NO
B Cell	chr4	+	84541203	ENSGALT00000099200	protein_coding	chr4	-	84540451	ENSGALT00000021740	protein_coding	NO
B Cell	chr4	+	90826517	ENSGALT00000069256	protein_coding	chr4	-	90825690	ENSGALT00000081390	protein_coding	NO
B Cell	chr4	+	297484	ENSGALT00000046424	protein_coding	chr4	-	297310	ENSGALT00000066789	protein_coding	NO
B Cell	chr4	+	297484	ENSGALT00000046424	protein_coding	chr4	-	297464	ENSGALT00000101581	protein_coding	NO
B Cell	chr4	+	546493	ENSGALT00000062907	protein_coding	chr4	-	545893	ENSGALT00000075116	protein_coding	NO
B Cell	chr4	+	1269815	ENSGALT00000006667	protein_coding	chr4	-	1269650	ENSGALT00000072126	protein_coding	NO
B Cell	chr4	+	1269815	ENSGALT00000006667	protein_coding	chr4	-	1269590	ENSGALT00000040650	protein_coding	NO
B Cell	chr4	+	1576519	ENSGALT00000006376	protein_coding	chr4	-	1576698	ENSGALT00000006401	protein_coding	NO
B Cell	chr4	+	1622478	ENSGALT00000074919	protein_coding	chr4	-	1622728	ENSGALT00000040562	protein_coding	NO
B Cell	chr4	+	2028579	ENSGALT00000007950	protein_coding	chr4	-	2028051	ENSGALT00000007941	protein_coding	NO
B Cell	chr4	+	2028579	ENSGALT00000007950	protein_coding	chr4	-	2028063	ENSGALT00000071143	protein_coding	NO
B Cell	chr4	+	2044716	ENSGALT00000087023	protein_coding	chr4	-	2045101	ENSGALT00000007977	protein_coding	NO
B Cell	chr4	+	2045167	ENSGALT00000053963	protein_coding	chr4	-	2045101	ENSGALT00000007977	protein_coding	NO
B Cell	chr4	+	2045172	ENSGALT00000008006	protein_coding	chr4	-	2045101	ENSGALT00000007977	protein_coding	NO
B Cell	chr4	+	4425298	ENSGALT00000010487	protein_coding	chr4	-	4425195	ENSGALT00000087631	protein_coding	NO
B Cell	chr4	+	5158784	ENSGALT00000010958	protein_coding	chr4	-	5158356	ENSGALT00000010924	protein_coding	NO
B Cell	chr4	+	5158784	ENSGALT00000010958	protein_coding	chr4	-	5158364	ENSGALT00000102612	protein_coding	NO
B Cell	chr4	+	11177126	ENSGALT00000087818	protein_coding	chr4	-	11177013	ENSGALT00000085105	protein_coding	NO
B Cell	chr4	+	11177147	ENSGALT00000032338	protein_coding	chr4	-	11177013	ENSGALT00000085105	protein_coding	NO
B Cell	chr4	+	11283944	ENSGALT00000012141	protein_coding	chr4	-	11283634	ENSGALT00000032336	protein_coding	NO
B Cell	chr4	+	12356621	ENSGALT00000107293	protein_coding	chr4	-	12355814	ENSGALT00000092737	protein_coding	NO
B Cell	chr4	+	12356621	ENSGALT00000107293	protein_coding	chr4	-	12356401	ENSGALT00000012569	protein_coding	NO
B Cell	chr4	+	14114459	ENSGALT00000013485	protein_coding	chr4	-	14114315	ENSGALT00000013477	protein_coding	NO
B Cell	chr4	+	14240582	ENSGALT00000107465	protein_coding	chr4	-	14240493	ENSGALT00000080428	protein_coding	YES
B Cell	chr4	+	14240582	ENSGALT00000107465	protein_coding	chr4	-	14240282	ENSGALT00000083385	protein_coding	YES
B Cell	chr4	+	14240582	ENSGALT00000107465	protein_coding	chr4	-	14240273	ENSGALT00000013690	protein_coding	YES
B Cell	chr4	+	14241154	ENSGALT00000093516	protein_coding	chr4	-	14240493	ENSGALT00000080428	protein_coding	NO
B Cell	chr4	+	14241154	ENSGALT00000093516	protein_coding	chr4	-	14240282	ENSGALT00000083385	protein_coding	NO
B Cell	chr4	+	14241154	ENSGALT00000093516	protein_coding	chr4	-	14240273	ENSGALT00000013690	protein_coding	NO
B Cell	chr4	+	16494367	ENSGALT00000039073	protein_coding	chr4	-	16494113	ENSGALT00000014034	protein_coding	NO
B Cell	chr4	+	16552917	ENSGALT00000014093	protein_coding	chr4	-	16552461	ENSGALT00000076460	protein_coding	NO
B Cell	chr4	+	16731360	ENSGALT00000014414	protein_coding	chr4	-	16731246	ENSGALT00000014405	protein_coding	NO
B Cell	chr4	+	16731360	ENSGALT00000014414	protein_coding	chr4	-	16731302	ENSGALT00000078164	protein_coding	NO
B Cell	chr4	+	17869308	ENSGALT00000105647	protein_coding	chr4	-	17870027	ENSGALT00000014860	protein_coding	NO
B Cell	chr4	+	31010882	ENSGALT00000016194	protein_coding	chr4	-	31010530	ENSGALT00000044835	protein_coding	NO
B Cell	chr4	+	34157922	ENSGALT00000043434	protein_coding	chr4	-	34157856	ENSGALT00000016483	protein_coding	NO
B Cell	chr4	+	38427791	ENSGALT00000017190	protein_coding	chr4	-	38427589	ENSGALT00000017172	protein_coding	NO
B Cell	chr4	+	38427791	ENSGALT00000017190	protein_coding	chr4	-	38427309	ENSGALT00000081029	protein_coding	NO
B Cell	chr4	+	38673416	ENSGALT00000017210	protein_coding	chr4	-	38673379	ENSGALT00000017207	protein_coding	NO
B Cell	chr4	+	39497494	ENSGALT00000017308	protein_coding	chr4	-	39497440	ENSGALT00000038264	protein_coding	NO
B Cell	chr4	+	39775031	ENSGALT00000095180	protein_coding	chr4	-	39775485	ENSGALT00000017333	protein_coding	NO
B Cell	chr4	+	43697039	ENSGALT00000103572	protein_coding	chr4	-	43697009	ENSGALT00000017505	protein_coding	NO
B Cell	chr4	+	44391490	ENSGALT00000017620	protein_coding	chr4	-	44391275	ENSGALT00000017617	protein_coding	NO
B Cell	chr4	+	45702437	ENSGALT00000017844	protein_coding	chr4	-	45702330	ENSGALT00000017784	protein_coding	NO
B Cell	chr4	+	46279853	ENSGALT00000076119	protein_coding	chr4	-	46280009	ENSGALT00000018144	protein_coding	NO
B Cell	chr4	+	46325343	ENSGALT00000092922	protein_coding	chr4	-	46324671	ENSGALT00000089315	protein_coding	NO
B Cell	chr4	+	46325343	ENSGALT00000092922	protein_coding	chr4	-	46324483	ENSGALT00000106878	protein_coding	NO
B Cell	chr4	+	46402175	ENSGALT00000038016	protein_coding	chr4	-	46402192	ENSGALT00000086779	protein_coding	NO
B Cell	chr4	+	46402175	ENSGALT00000038016	protein_coding	chr4	-	46402835	ENSGALT00000057256	protein_coding	NO
B Cell	chr4	+	46402178	ENSGALT00000068418	protein_coding	chr4	-	46402192	ENSGALT00000086779	protein_coding	NO
B Cell	chr4	+	46402178	ENSGALT00000068418	protein_coding	chr4	-	46402835	ENSGALT00000057256	protein_coding	NO
B Cell	chr4	+	46463750	ENSGALT00000038003	protein_coding	chr4	-	46463696	ENSGALT00000018274	protein_coding	NO
B Cell	chr4	+	46473485	ENSGALT00000063674	protein_coding	chr4	-	46472824	ENSGALT00000018281	protein_coding	NO
B Cell	chr4	+	49197875	ENSGALT00000053612	protein_coding	chr4	-	49197803	ENSGALT00000037965	protein_coding	NO
B Cell	chr4	+	49238032	ENSGALT00000041395	protein_coding	chr4	-	49237907	ENSGALT00000018588	protein_coding	NO
B Cell	chr4	+	57098782	ENSGALT00000107705	protein_coding	chr4	-	57098235	ENSGALT00000019679	protein_coding	NO
B Cell	chr4	+	63148950	ENSGALT00000022198	protein_coding	chr4	-	63148736	ENSGALT00000091505	protein_coding	NO
B Cell	chr4	+	63149497	ENSGALT00000072687	protein_coding	chr4	-	63148736	ENSGALT00000091505	protein_coding	NO
B Cell	chr4	+	69289314	ENSGALT00000060110	protein_coding	chr4	-	69289274	ENSGALT00000093090	protein_coding	NO
B Cell	chr4	+	69506741	ENSGALT00000097350	protein_coding	chr4	-	69506031	ENSGALT00000022105	protein_coding	NO
B Cell	chr4	+	69506846	ENSGALT00000102011	protein_coding	chr4	-	69506031	ENSGALT00000022105	protein_coding	NO
B Cell	chr4	+	69506850	ENSGALT00000102613	protein_coding	chr4	-	69506031	ENSGALT00000022105	protein_coding	NO
B Cell	chr4	+	78538303	ENSGALT00000024204	protein_coding	chr4	-	78538243	ENSGALT00000024191	protein_coding	NO
B Cell	chr4	+	80968535	ENSGALT00000025145	protein_coding	chr4	-	80968494	ENSGALT00000025139	protein_coding	NO
B Cell	chr4	+	82245801	ENSGALT00000025234	protein_coding	chr4	-	82245582	ENSGALT00000025226	protein_coding	NO
B Cell	chr4	+	85464567	ENSGALT00000025439	protein_coding	chr4	-	85464361	ENSGALT00000067463	protein_coding	NO
B Cell	chr4	+	85493266	ENSGALT00000032023	protein_coding	chr4	-	85493109	ENSGALT00000025450	protein_coding	NO
B Cell	chr4	+	85493266	ENSGALT00000032023	protein_coding	chr4	-	85493124	ENSGALT00000107203	protein_coding	NO
B Cell	chr4	+	89703489	ENSGALT00000025924	protein_coding	chr4	-	89703407	ENSGALT00000037092	protein_coding	NO
B Cell	chr4	+	90893194	ENSGALT00000062690	protein_coding	chr4	-	90892554	ENSGALT00000073493	protein_coding	NO
B Cell	chr5	+	23040707	ENSGALT00000013143	protein_coding	chr5	-	23041095	ENSGALT00000013133	protein_coding	NO
B Cell	chr5	+	1673837	ENSGALT00000006901	protein_coding	chr5	-	1673814	ENSGALT00000006955	protein_coding	NO
B Cell	chr5	+	39583739	ENSGALT00000102633	protein_coding	chr5	-	39584221	ENSGALT00000017099	protein_coding	NO
B Cell	chr5	+	120673	ENSGALT00000065126	protein_coding	chr5	-	120614	ENSGALT00000056009	protein_coding	NO
B Cell	chr5	+	326515	ENSGALT00000050813	protein_coding	chr5	-	326196	ENSGALT00000054504	protein_coding	NO
B Cell	chr5	+	332885	ENSGALT00000086995	protein_coding	chr5	-	333052	ENSGALT00000069064	protein_coding	NO
B Cell	chr5	+	332885	ENSGALT00000086995	protein_coding	chr5	-	332750	ENSGALT00000089101	protein_coding	NO
B Cell	chr5	+	332885	ENSGALT00000086995	protein_coding	chr5	-	333446	ENSGALT00000089662	protein_coding	NO
B Cell	chr5	+	344652	ENSGALT00000050879	protein_coding	chr5	-	344733	ENSGALT00000071357	protein_coding	NO
B Cell	chr5	+	488087	ENSGALT00000065146	protein_coding	chr5	-	487714	ENSGALT00000088715	protein_coding	NO
B Cell	chr5	+	488087	ENSGALT00000065146	protein_coding	chr5	-	487737	ENSGALT00000047175	protein_coding	NO
B Cell	chr5	+	646632	ENSGALT00000047038	protein_coding	chr5	-	645731	ENSGALT00000055606	protein_coding	NO
B Cell	chr5	+	692120	ENSGALT00000071261	protein_coding	chr5	-	692319	ENSGALT00000086673	protein_coding	NO
B Cell	chr5	+	766240	ENSGALT00000056832	protein_coding	chr5	-	766118	ENSGALT00000103503	protein_coding	NO
B Cell	chr5	+	1132930	ENSGALT00000067723	protein_coding	chr5	-	1132730	ENSGALT00000071295	protein_coding	NO
B Cell	chr5	+	1132950	ENSGALT00000052016	protein_coding	chr5	-	1132730	ENSGALT00000071295	protein_coding	NO
B Cell	chr5	+	1847181	ENSGALT00000048179	protein_coding	chr5	-	1847181	ENSGALT00000082342	protein_coding	NO
B Cell	chr5	+	1864699	ENSGALT00000006633	protein_coding	chr5	-	1864605	ENSGALT00000006659	protein_coding	NO
B Cell	chr5	+	1864699	ENSGALT00000006633	protein_coding	chr5	-	1864286	ENSGALT00000097762	protein_coding	NO
B Cell	chr5	+	1895073	ENSGALT00000006531	protein_coding	chr5	-	1894802	ENSGALT00000006602	protein_coding	NO
B Cell	chr5	+	7254513	ENSGALT00000019104	protein_coding	chr5	-	7254371	ENSGALT00000019117	protein_coding	NO
B Cell	chr5	+	10790779	ENSGALT00000009761	protein_coding	chr5	-	10791201	ENSGALT00000009745	protein_coding	NO
B Cell	chr5	+	15871248	ENSGALT00000039057	protein_coding	chr5	-	15870934	ENSGALT00000108376	protein_coding	NO
B Cell	chr5	+	15871248	ENSGALT00000039057	protein_coding	chr5	-	15870588	ENSGALT00000054634	protein_coding	NO
B Cell	chr5	+	17229963	ENSGALT00000011877	protein_coding	chr5	-	17229764	ENSGALT00000011887	protein_coding	NO
B Cell	chr5	+	17229963	ENSGALT00000011877	protein_coding	chr5	-	17229716	ENSGALT00000085888	protein_coding	NO
B Cell	chr5	+	17262338	ENSGALT00000007737	protein_coding	chr5	-	17261848	ENSGALT00000011936	protein_coding	NO
B Cell	chr5	+	19099002	ENSGALT00000072338	protein_coding	chr5	-	19098880	ENSGALT00000059308	protein_coding	NO
B Cell	chr5	+	23031412	ENSGALT00000083745	protein_coding	chr5	-	23031266	ENSGALT00000013121	protein_coding	NO
B Cell	chr5	+	23379939	ENSGALT00000013368	protein_coding	chr5	-	23379900	ENSGALT00000056175	protein_coding	NO
B Cell	chr5	+	24796211	ENSGALT00000013978	protein_coding	chr5	-	24795962	ENSGALT00000038321	protein_coding	NO
B Cell	chr5	+	24817276	ENSGALT00000013997	protein_coding	chr5	-	24817551	ENSGALT00000013981	protein_coding	NO
B Cell	chr5	+	25852298	ENSGALT00000014708	protein_coding	chr5	-	25852094	ENSGALT00000014672	protein_coding	NO
B Cell	chr5	+	25961530	ENSGALT00000014837	protein_coding	chr5	-	25961481	ENSGALT00000086059	protein_coding	NO
B Cell	chr5	+	26271723	ENSGALT00000015071	protein_coding	chr5	-	26270727	ENSGALT00000015050	protein_coding	NO
B Cell	chr5	+	28232932	ENSGALT00000028069	protein_coding	chr5	-	28232774	ENSGALT00000015368	protein_coding	NO
B Cell	chr5	+	28233032	ENSGALT00000100984	protein_coding	chr5	-	28232774	ENSGALT00000015368	protein_coding	NO
B Cell	chr5	+	29074719	ENSGALT00000015501	protein_coding	chr5	-	29074495	ENSGALT00000015480	protein_coding	NO
B Cell	chr5	+	29100044	ENSGALT00000015524	protein_coding	chr5	-	29099825	ENSGALT00000015509	protein_coding	NO
B Cell	chr5	+	29151953	ENSGALT00000059199	protein_coding	chr5	-	29151380	ENSGALT00000098841	protein_coding	NO
B Cell	chr5	+	29180598	ENSGALT00000088383	protein_coding	chr5	-	29180567	ENSGALT00000015576	protein_coding	NO
B Cell	chr5	+	34531602	ENSGALT00000088574	protein_coding	chr5	-	34531295	ENSGALT00000071000	protein_coding	NO
B Cell	chr5	+	36286790	ENSGALT00000016327	protein_coding	chr5	-	36286597	ENSGALT00000037840	protein_coding	NO
B Cell	chr5	+	36329805	ENSGALT00000055604	protein_coding	chr5	-	36329700	ENSGALT00000016334	protein_coding	NO
B Cell	chr5	+	37813406	ENSGALT00000016532	protein_coding	chr5	-	37812677	ENSGALT00000016512	protein_coding	NO
B Cell	chr5	+	37880444	ENSGALT00000085893	protein_coding	chr5	-	37880025	ENSGALT00000016569	protein_coding	NO
B Cell	chr5	+	37907100	ENSGALT00000016576	protein_coding	chr5	-	37906784	ENSGALT00000016575	protein_coding	NO
B Cell	chr5	+	37954399	ENSGALT00000091614	protein_coding	chr5	-	37954593	ENSGALT00000016604	protein_coding	NO
B Cell	chr5	+	38539034	ENSGALT00000037710	protein_coding	chr5	-	38538859	ENSGALT00000073284	protein_coding	NO
B Cell	chr5	+	38539114	ENSGALT00000089352	protein_coding	chr5	-	38538859	ENSGALT00000073284	protein_coding	NO
B Cell	chr5	+	39441319	ENSGALT00000017033	protein_coding	chr5	-	39440884	ENSGALT00000078943	protein_coding	NO
B Cell	chr5	+	39441319	ENSGALT00000017033	protein_coding	chr5	-	39440808	ENSGALT00000017028	protein_coding	NO
B Cell	chr5	+	39564622	ENSGALT00000055042	protein_coding	chr5	-	39564681	ENSGALT00000017074	protein_coding	NO
B Cell	chr5	+	39564645	ENSGALT00000061833	protein_coding	chr5	-	39564681	ENSGALT00000017074	protein_coding	NO
B Cell	chr5	+	44776754	ENSGALT00000017538	protein_coding	chr5	-	44776779	ENSGALT00000037601	protein_coding	NO
B Cell	chr5	+	46646126	ENSGALT00000101237	protein_coding	chr5	-	46646278	ENSGALT00000066952	protein_coding	NO
B Cell	chr5	+	46646782	ENSGALT00000018066	protein_coding	chr5	-	46646278	ENSGALT00000066952	protein_coding	NO
B Cell	chr5	+	48197830	ENSGALT00000018166	protein_coding	chr5	-	48197477	ENSGALT00000081292	protein_coding	NO
B Cell	chr5	+	50525666	ENSGALT00000018785	protein_coding	chr5	-	50524885	ENSGALT00000018765	protein_coding	NO
B Cell	chr5	+	50603437	ENSGALT00000088671	protein_coding	chr5	-	50603397	ENSGALT00000075288	protein_coding	NO
B Cell	chr5	+	50675343	ENSGALT00000060862	protein_coding	chr5	-	50674947	ENSGALT00000048564	protein_coding	NO
B Cell	chr5	+	50675343	ENSGALT00000060862	protein_coding	chr5	-	50674921	ENSGALT00000088092	protein_coding	NO
B Cell	chr5	+	50675360	ENSGALT00000018805	protein_coding	chr5	-	50674947	ENSGALT00000048564	protein_coding	NO
B Cell	chr5	+	50675360	ENSGALT00000018805	protein_coding	chr5	-	50674921	ENSGALT00000088092	protein_coding	NO
B Cell	chr5	+	54446772	ENSGALT00000091404	protein_coding	chr5	-	54446537	ENSGALT00000019409	protein_coding	NO
B Cell	chr5	+	54570180	ENSGALT00000028076	protein_coding	chr5	-	54569488	ENSGALT00000019434	protein_coding	NO
B Cell	chr5	+	55000989	ENSGALT00000019600	protein_coding	chr5	-	55000810	ENSGALT00000019598	protein_coding	NO
B Cell	chr5	+	55398602	ENSGALT00000089409	protein_coding	chr5	-	55398498	ENSGALT00000037343	protein_coding	NO
B Cell	chr5	+	55769359	ENSGALT00000079178	protein_coding	chr5	-	55769932	ENSGALT00000019765	protein_coding	NO
B Cell	chr5	+	56496546	ENSGALT00000060006	protein_coding	chr5	-	56496095	ENSGALT00000083456	protein_coding	NO
B Cell	chr5	+	57738303	ENSGALT00000045308	protein_coding	chr5	-	57738431	ENSGALT00000019972	protein_coding	NO
B Cell	chr5	+	57738441	ENSGALT00000063504	protein_coding	chr5	-	57738431	ENSGALT00000019972	protein_coding	YES
B Cell	chr5	+	57738490	ENSGALT00000019973	protein_coding	chr5	-	57738431	ENSGALT00000019972	protein_coding	NO
B Cell	chr5	+	57934570	ENSGALT00000074859	protein_coding	chr5	-	57934479	ENSGALT00000020072	protein_coding	NO
B Cell	chr5	+	58333185	ENSGALT00000037204	protein_coding	chr5	-	58332931	ENSGALT00000020248	protein_coding	NO
B Cell	chr5	+	58368966	ENSGALT00000088324	protein_coding	chr5	-	58368109	ENSGALT00000020256	protein_coding	NO
B Cell	chr5	+	58369022	ENSGALT00000083206	protein_coding	chr5	-	58368109	ENSGALT00000020256	protein_coding	NO
B Cell	chr5	+	58942971	ENSGALT00000070716	protein_coding	chr5	-	58943967	ENSGALT00000057113	protein_coding	NO
B Cell	chr5	+	59000366	ENSGALT00000048207	protein_coding	chr5	-	59000025	ENSGALT00000076624	protein_coding	NO
B Cell	chr6	+	7337218	ENSGALT00000004372	protein_coding	chr6	-	7337324	ENSGALT00000004359	protein_coding	NO
B Cell	chr6	+	23068561	ENSGALT00000012088	protein_coding	chr6	-	23068556	ENSGALT00000039577	protein_coding	NO
B Cell	chr6	+	3395933	ENSGALT00000044395	protein_coding	chr6	-	3395369	ENSGALT00000070619	protein_coding	NO
B Cell	chr6	+	3507800	ENSGALT00000003306	protein_coding	chr6	-	3507991	ENSGALT00000003257	protein_coding	NO
B Cell	chr6	+	12181166	ENSGALT00000089611	protein_coding	chr6	-	12181430	ENSGALT00000007029	protein_coding	NO
B Cell	chr6	+	12181510	ENSGALT00000050662	protein_coding	chr6	-	12181430	ENSGALT00000007029	protein_coding	NO
B Cell	chr6	+	12181527	ENSGALT00000049666	protein_coding	chr6	-	12181430	ENSGALT00000007029	protein_coding	NO
B Cell	chr6	+	14006541	ENSGALT00000007929	protein_coding	chr6	-	14006192	ENSGALT00000084442	protein_coding	NO
B Cell	chr6	+	14006541	ENSGALT00000007929	protein_coding	chr6	-	14006199	ENSGALT00000062091	protein_coding	NO
B Cell	chr6	+	14006541	ENSGALT00000007929	protein_coding	chr6	-	14006572	ENSGALT00000072914	protein_coding	NO
B Cell	chr6	+	27694194	ENSGALT00000088195	protein_coding	chr6	-	27693870	ENSGALT00000014409	protein_coding	NO
B Cell	chr6	+	27694237	ENSGALT00000053125	protein_coding	chr6	-	27693870	ENSGALT00000014409	protein_coding	NO
B Cell	chr6	+	31321085	ENSGALT00000015412	protein_coding	chr6	-	31321417	ENSGALT00000038766	protein_coding	NO
B Cell	chr6	+	5912790	ENSGALT00000107626	protein_coding	chr6	-	5912683	ENSGALT00000004232	protein_coding	NO
B Cell	chr6	+	5913270	ENSGALT00000092728	protein_coding	chr6	-	5912683	ENSGALT00000004232	protein_coding	NO
B Cell	chr6	+	5951612	ENSGALT00000004265	protein_coding	chr6	-	5951365	ENSGALT00000080626	protein_coding	NO
B Cell	chr6	+	5951612	ENSGALT00000004265	protein_coding	chr6	-	5951420	ENSGALT00000034167	protein_coding	NO
B Cell	chr6	+	10057706	ENSGALT00000005587	protein_coding	chr6	-	10057694	ENSGALT00000040987	protein_coding	NO
B Cell	chr6	+	11282255	ENSGALT00000051779	protein_coding	chr6	-	11282106	ENSGALT00000006268	protein_coding	NO
B Cell	chr6	+	11432907	ENSGALT00000108071	protein_coding	chr6	-	11432319	ENSGALT00000105324	protein_coding	NO
B Cell	chr6	+	12236269	ENSGALT00000079414	protein_coding	chr6	-	12235990	ENSGALT00000052084	protein_coding	NO
B Cell	chr6	+	16221444	ENSGALT00000052471	protein_coding	chr6	-	16221228	ENSGALT00000008109	protein_coding	NO
B Cell	chr6	+	17600885	ENSGALT00000055705	protein_coding	chr6	-	17600114	ENSGALT00000088192	protein_coding	NO
B Cell	chr6	+	18246636	ENSGALT00000076222	protein_coding	chr6	-	18246423	ENSGALT00000009141	protein_coding	NO
B Cell	chr6	+	23057822	ENSGALT00000012071	protein_coding	chr6	-	23058446	ENSGALT00000046257	protein_coding	NO
B Cell	chr6	+	23273198	ENSGALT00000009932	protein_coding	chr6	-	23272729	ENSGALT00000009924	protein_coding	NO
B Cell	chr6	+	23286308	ENSGALT00000012245	protein_coding	chr6	-	23286288	ENSGALT00000044288	protein_coding	NO
B Cell	chr6	+	23310319	ENSGALT00000051958	protein_coding	chr6	-	23310469	ENSGALT00000039466	protein_coding	NO
B Cell	chr6	+	24041932	ENSGALT00000062161	protein_coding	chr6	-	24041819	ENSGALT00000028328	protein_coding	NO
B Cell	chr6	+	24136935	ENSGALT00000013142	protein_coding	chr6	-	24136313	ENSGALT00000013124	protein_coding	NO
B Cell	chr6	+	24283252	ENSGALT00000013171	protein_coding	chr6	-	24283161	ENSGALT00000013061	protein_coding	NO
B Cell	chr6	+	24515368	ENSGALT00000101131	protein_coding	chr6	-	24515401	ENSGALT00000013309	protein_coding	NO
B Cell	chr6	+	24565602	ENSGALT00000056557	protein_coding	chr6	-	24564958	ENSGALT00000051809	protein_coding	NO
B Cell	chr6	+	24565602	ENSGALT00000056557	protein_coding	chr6	-	24564969	ENSGALT00000099770	protein_coding	NO
B Cell	chr6	+	25039312	ENSGALT00000090421	protein_coding	chr6	-	25039301	ENSGALT00000013519	protein_coding	NO
B Cell	chr6	+	25039938	ENSGALT00000013539	protein_coding	chr6	-	25039301	ENSGALT00000013519	protein_coding	NO
B Cell	chr6	+	26933848	ENSGALT00000071147	protein_coding	chr6	-	26933520	ENSGALT00000069473	protein_coding	YES
B Cell	chr6	+	28519490	ENSGALT00000014546	protein_coding	chr6	-	28518725	ENSGALT00000033097	protein_coding	NO
B Cell	chr6	+	30953845	ENSGALT00000015203	protein_coding	chr6	-	30953116	ENSGALT00000015192	protein_coding	NO
B Cell	chr6	+	33119432	ENSGALT00000062166	protein_coding	chr6	-	33118538	ENSGALT00000057513	protein_coding	NO
B Cell	chr7	+	12576608	ENSGALT00000104354	protein_coding	chr7	-	12576467	ENSGALT00000013984	protein_coding	NO
B Cell	chr7	+	12576682	ENSGALT00000014015	protein_coding	chr7	-	12576467	ENSGALT00000013984	protein_coding	NO
B Cell	chr7	+	2842237	ENSGALT00000004656	protein_coding	chr7	-	2842090	ENSGALT00000050691	protein_coding	NO
B Cell	chr7	+	17913231	ENSGALT00000073063	protein_coding	chr7	-	17914041	ENSGALT00000015508	protein_coding	NO
B Cell	chr7	+	17914061	ENSGALT00000053303	protein_coding	chr7	-	17914041	ENSGALT00000015508	protein_coding	NO
B Cell	chr7	+	10231653	ENSGALT00000055633	protein_coding	chr7	-	10231186	ENSGALT00000013137	protein_coding	NO
B Cell	chr7	+	11026371	ENSGALT00000054299	protein_coding	chr7	-	11026303	ENSGALT00000013230	protein_coding	NO
B Cell	chr7	+	11026371	ENSGALT00000054299	protein_coding	chr7	-	11025704	ENSGALT00000101178	protein_coding	NO
B Cell	chr7	+	11313252	ENSGALT00000013388	protein_coding	chr7	-	11313271	ENSGALT00000013390	protein_coding	NO
B Cell	chr7	+	15401945	ENSGALT00000081426	protein_coding	chr7	-	15401754	ENSGALT00000033300	protein_coding	NO
B Cell	chr7	+	16914150	ENSGALT00000023090	protein_coding	chr7	-	16914087	ENSGALT00000082696	protein_coding	NO
B Cell	chr7	+	16914150	ENSGALT00000023090	protein_coding	chr7	-	16914700	ENSGALT00000067425	protein_coding	NO
B Cell	chr7	+	18041028	ENSGALT00000015575	protein_coding	chr7	-	18040268	ENSGALT00000047481	protein_coding	NO
B Cell	chr7	+	18572974	ENSGALT00000015749	protein_coding	chr7	-	18572441	ENSGALT00000090132	protein_coding	NO
B Cell	chr7	+	22212055	ENSGALT00000018482	protein_coding	chr7	-	22211975	ENSGALT00000018480	protein_coding	NO
B Cell	chr7	+	22473685	ENSGALT00000018584	protein_coding	chr7	-	22473283	ENSGALT00000089146	protein_coding	NO
B Cell	chr7	+	22503352	ENSGALT00000038204	protein_coding	chr7	-	22503173	ENSGALT00000060961	protein_coding	NO
B Cell	chr7	+	22559064	ENSGALT00000018650	protein_coding	chr7	-	22558194	ENSGALT00000035713	protein_coding	NO
B Cell	chr7	+	22565739	ENSGALT00000087444	protein_coding	chr7	-	22565509	ENSGALT00000104613	protein_coding	NO
B Cell	chr7	+	22588094	ENSGALT00000081249	protein_coding	chr7	-	22587368	ENSGALT00000018675	protein_coding	NO
B Cell	chr7	+	26247146	ENSGALT00000019041	protein_coding	chr7	-	26246801	ENSGALT00000019039	protein_coding	NO
B Cell	chr7	+	28261410	ENSGALT00000083500	protein_coding	chr7	-	28261454	ENSGALT00000019727	protein_coding	NO
B Cell	chr7	+	28261938	ENSGALT00000090492	protein_coding	chr7	-	28261454	ENSGALT00000019727	protein_coding	NO
B Cell	chr7	+	28275427	ENSGALT00000019743	protein_coding	chr7	-	28275367	ENSGALT00000096667	protein_coding	NO
B Cell	chr7	+	28385667	ENSGALT00000032941	protein_coding	chr7	-	28385331	ENSGALT00000019785	protein_coding	NO
B Cell	chr8	+	1703383	ENSGALT00000003258	protein_coding	chr8	-	1703317	ENSGALT00000107209	protein_coding	NO
B Cell	chr8	+	4701720	ENSGALT00000087659	protein_coding	chr8	-	4702534	ENSGALT00000004826	protein_coding	NO
B Cell	chr8	+	11257066	ENSGALT00000049444	protein_coding	chr8	-	11257043	ENSGALT00000053059	protein_coding	NO
B Cell	chr8	+	21490164	ENSGALT00000016635	protein_coding	chr8	-	21490018	ENSGALT00000101407	protein_coding	NO
B Cell	chr8	+	26692554	ENSGALT00000053156	protein_coding	chr8	-	26692538	ENSGALT00000038040	protein_coding	NO
B Cell	chr8	+	26692579	ENSGALT00000055523	protein_coding	chr8	-	26692538	ENSGALT00000038040	protein_coding	NO
B Cell	chr8	+	3879101	ENSGALT00000057890	protein_coding	chr8	-	3878789	ENSGALT00000003897	protein_coding	NO
B Cell	chr8	+	4530999	ENSGALT00000079169	protein_coding	chr8	-	4530748	ENSGALT00000067193	protein_coding	NO
B Cell	chr8	+	4686652	ENSGALT00000004803	protein_coding	chr8	-	4686254	ENSGALT00000004793	protein_coding	NO
B Cell	chr8	+	5470225	ENSGALT00000056245	protein_coding	chr8	-	5470362	ENSGALT00000072136	protein_coding	NO
B Cell	chr8	+	5849190	ENSGALT00000005458	protein_coding	chr8	-	5849103	ENSGALT00000039783	protein_coding	NO
B Cell	chr8	+	5934399	ENSGALT00000005721	protein_coding	chr8	-	5934325	ENSGALT00000085107	protein_coding	NO
B Cell	chr8	+	10837333	ENSGALT00000053904	protein_coding	chr8	-	10837430	ENSGALT00000008146	protein_coding	NO
B Cell	chr8	+	12304100	ENSGALT00000073865	protein_coding	chr8	-	12303972	ENSGALT00000008464	protein_coding	NO
B Cell	chr8	+	12336170	ENSGALT00000008503	protein_coding	chr8	-	12336161	ENSGALT00000008481	protein_coding	NO
B Cell	chr8	+	14378875	ENSGALT00000009497	protein_coding	chr8	-	14378262	ENSGALT00000009468	protein_coding	NO
B Cell	chr8	+	14599941	ENSGALT00000083083	protein_coding	chr8	-	14600186	ENSGALT00000093295	protein_coding	NO
B Cell	chr8	+	16296959	ENSGALT00000073451	protein_coding	chr8	-	16296312	ENSGALT00000044504	protein_coding	NO
B Cell	chr8	+	16965971	ENSGALT00000044254	protein_coding	chr8	-	16965095	ENSGALT00000014282	protein_coding	NO
B Cell	chr8	+	19243035	ENSGALT00000014525	protein_coding	chr8	-	19242727	ENSGALT00000014497	protein_coding	NO
B Cell	chr8	+	19243199	ENSGALT00000086462	protein_coding	chr8	-	19242727	ENSGALT00000014497	protein_coding	NO
B Cell	chr8	+	19332099	ENSGALT00000014598	protein_coding	chr8	-	19331487	ENSGALT00000014556	protein_coding	NO
B Cell	chr8	+	20069341	ENSGALT00000044617	protein_coding	chr8	-	20069284	ENSGALT00000016237	protein_coding	NO
B Cell	chr8	+	20717727	ENSGALT00000090388	protein_coding	chr8	-	20717622	ENSGALT00000016408	protein_coding	NO
B Cell	chr8	+	20717727	ENSGALT00000090388	protein_coding	chr8	-	20717559	ENSGALT00000103965	protein_coding	NO
B Cell	chr8	+	21119709	ENSGALT00000068781	protein_coding	chr8	-	21119486	ENSGALT00000090804	protein_coding	NO
B Cell	chr8	+	21120302	ENSGALT00000016466	protein_coding	chr8	-	21119486	ENSGALT00000090804	protein_coding	NO
B Cell	chr8	+	21291711	ENSGALT00000068538	protein_coding	chr8	-	21291575	ENSGALT00000016610	protein_coding	NO
B Cell	chr8	+	21574983	ENSGALT00000016717	protein_coding	chr8	-	21574425	ENSGALT00000016711	protein_coding	NO
B Cell	chr8	+	21575015	ENSGALT00000103080	protein_coding	chr8	-	21574425	ENSGALT00000016711	protein_coding	NO
B Cell	chr8	+	21951320	ENSGALT00000028065	protein_coding	chr8	-	21951011	ENSGALT00000016866	protein_coding	NO
B Cell	chr8	+	22291564	ENSGALT00000017068	protein_coding	chr8	-	22290927	ENSGALT00000017063	protein_coding	NO
B Cell	chr8	+	24612083	ENSGALT00000017200	protein_coding	chr8	-	24611889	ENSGALT00000017199	protein_coding	NO
B Cell	chr8	+	24744262	ENSGALT00000017291	protein_coding	chr8	-	24744108	ENSGALT00000017286	protein_coding	NO
B Cell	chr8	+	24858271	ENSGALT00000017315	protein_coding	chr8	-	24858084	ENSGALT00000049002	protein_coding	NO
B Cell	chr8	+	24858271	ENSGALT00000017315	protein_coding	chr8	-	24857696	ENSGALT00000061228	protein_coding	NO
B Cell	chr8	+	24886659	ENSGALT00000017326	protein_coding	chr8	-	24886539	ENSGALT00000017321	protein_coding	NO
B Cell	chr8	+	25466485	ENSGALT00000017480	protein_coding	chr8	-	25466172	ENSGALT00000077979	protein_coding	NO
B Cell	chr8	+	25489528	ENSGALT00000017487	protein_coding	chr8	-	25489409	ENSGALT00000067426	protein_coding	NO
B Cell	chr8	+	28187202	ENSGALT00000017909	protein_coding	chr8	-	28187331	ENSGALT00000044324	protein_coding	NO
B Cell	chr8	+	28187202	ENSGALT00000017909	protein_coding	chr8	-	28187137	ENSGALT00000017906	protein_coding	NO
B Cell	chr8	+	29988143	ENSGALT00000082474	protein_coding	chr8	-	29988079	ENSGALT00000018533	protein_coding	NO
B Cell	chr9	+	4978364	ENSGALT00000010150	protein_coding	chr9	-	4978293	ENSGALT00000105472	protein_coding	NO
B Cell	chr9	+	4978914	ENSGALT00000094302	protein_coding	chr9	-	4978293	ENSGALT00000105472	protein_coding	NO
B Cell	chr9	+	904821	ENSGALT00000057097	protein_coding	chr9	-	904537	ENSGALT00000063095	protein_coding	NO
B Cell	chr9	+	904821	ENSGALT00000057097	protein_coding	chr9	-	904547	ENSGALT00000087340	protein_coding	NO
B Cell	chr9	+	3837536	ENSGALT00000010715	protein_coding	chr9	-	3837466	ENSGALT00000050003	protein_coding	NO
B Cell	chr9	+	4531071	ENSGALT00000089595	protein_coding	chr9	-	4530759	ENSGALT00000010599	protein_coding	NO
B Cell	chr9	+	4565922	ENSGALT00000010555	protein_coding	chr9	-	4565051	ENSGALT00000010563	protein_coding	NO
B Cell	chr9	+	4871957	ENSGALT00000010325	protein_coding	chr9	-	4871302	ENSGALT00000104565	protein_coding	NO
B Cell	chr9	+	4951778	ENSGALT00000057291	protein_coding	chr9	-	4951651	ENSGALT00000033591	protein_coding	NO
B Cell	chr9	+	4951849	ENSGALT00000089837	protein_coding	chr9	-	4951651	ENSGALT00000033591	protein_coding	NO
B Cell	chr9	+	5151262	ENSGALT00000061249	protein_coding	chr9	-	5150308	ENSGALT00000009355	protein_coding	NO
B Cell	chr9	+	8181676	ENSGALT00000040843	protein_coding	chr9	-	8181705	ENSGALT00000008412	protein_coding	NO
B Cell	chr9	+	9629221	ENSGALT00000063482	protein_coding	chr9	-	9628462	ENSGALT00000107630	protein_coding	YES
B Cell	chr9	+	12614244	ENSGALT00000106829	protein_coding	chr9	-	12614155	ENSGALT00000063502	protein_coding	NO
B Cell	chr9	+	12807907	ENSGALT00000052521	protein_coding	chr9	-	12807370	ENSGALT00000011255	protein_coding	NO
B Cell	chr9	+	15525420	ENSGALT00000012571	protein_coding	chr9	-	15525201	ENSGALT00000059427	protein_coding	NO
B Cell	chr9	+	16024418	ENSGALT00000045745	protein_coding	chr9	-	16024265	ENSGALT00000013850	protein_coding	NO
B Cell	chr9	+	16044674	ENSGALT00000010167	protein_coding	chr9	-	16044575	ENSGALT00000010137	protein_coding	NO
B Cell	chr9	+	17588518	ENSGALT00000088608	protein_coding	chr9	-	17588440	ENSGALT00000014768	protein_coding	NO
B Cell	chr9	+	20764373	ENSGALT00000015429	protein_coding	chr9	-	20764204	ENSGALT00000015416	protein_coding	NO
B Cell	chr9	+	23034763	ENSGALT00000043771	protein_coding	chr9	-	23033870	ENSGALT00000016682	protein_coding	NO
B Cell	chr9	+	23104837	ENSGALT00000016761	protein_coding	chr9	-	23104817	ENSGALT00000016730	protein_coding	NO
B Cell	chr9	+	23804523	ENSGALT00000049525	protein_coding	chr9	-	23804409	ENSGALT00000085925	protein_coding	NO
B Cell	chr9	+	23940327	ENSGALT00000045065	protein_coding	chr9	-	23940203	ENSGALT00000085254	protein_coding	NO
B Cell	chr9	+	23940327	ENSGALT00000045065	protein_coding	chr9	-	23939891	ENSGALT00000038908	protein_coding	NO
B Cell	chrM	+	8330	ENSGALT00000054328	protein_coding	chrM	-	8258	ENSGALT00000056830	protein_coding	NO
B Cell	chrM	+	9084	ENSGALT00000054361	protein_coding	chrM	-	8258	ENSGALT00000056830	protein_coding	NO
B Cell	chrM	+	9239	ENSGALT00000076413	protein_coding	chrM	-	8258	ENSGALT00000056830	protein_coding	NO
B Cell	chrW	+	1840622	ENSGALT00000089854	protein_coding	chrW	-	1840514	ENSGALT00000070852	protein_coding	NO
B Cell	chrW	+	1840699	ENSGALT00000051715	protein_coding	chrW	-	1840514	ENSGALT00000070852	protein_coding	NO
B Cell	chrW	+	1840703	ENSGALT00000086362	protein_coding	chrW	-	1840514	ENSGALT00000070852	protein_coding	NO
B Cell	chrZ	+	16760912	ENSGALT00000023719	protein_coding	chrZ	-	16761257	ENSGALT00000023700	protein_coding	NO
B Cell	chrZ	+	9172856	ENSGALT00000004022	protein_coding	chrZ	-	9172144	ENSGALT00000003976	protein_coding	NO
B Cell	chrZ	+	18970570	ENSGALT00000043539	protein_coding	chrZ	-	18970451	ENSGALT00000095697	protein_coding	NO
B Cell	chrZ	+	20211835	ENSGALT00000086720	protein_coding	chrZ	-	20211616	ENSGALT00000045606	protein_coding	NO
B Cell	chrZ	+	20570576	ENSGALT00000023799	protein_coding	chrZ	-	20570488	ENSGALT00000023789	protein_coding	NO
B Cell	chrZ	+	25266791	ENSGALT00000024194	protein_coding	chrZ	-	25266771	ENSGALT00000074012	protein_coding	NO
B Cell	chrZ	+	63173580	ENSGALT00000084743	protein_coding	chrZ	-	63173370	ENSGALT00000025179	protein_coding	NO
B Cell	chrZ	+	70755484	ENSGALT00000003013	protein_coding	chrZ	-	70754882	ENSGALT00000003009	protein_coding	NO
B Cell	chrZ	+	73136595	ENSGALT00000003696	protein_coding	chrZ	-	73136810	ENSGALT00000003691	protein_coding	NO
B Cell	chrZ	+	593050	ENSGALT00000050991	protein_coding	chrZ	-	592143	ENSGALT00000060092	protein_coding	NO
B Cell	chrZ	+	7102974	ENSGALT00000045400	protein_coding	chrZ	-	7102689	ENSGALT00000039551	protein_coding	NO
B Cell	chrZ	+	9072455	ENSGALT00000049867	protein_coding	chrZ	-	9071860	ENSGALT00000043852	protein_coding	NO
B Cell	chrZ	+	9126063	ENSGALT00000003796	protein_coding	chrZ	-	9125910	ENSGALT00000003768	protein_coding	NO
B Cell	chrZ	+	9126063	ENSGALT00000003796	protein_coding	chrZ	-	9126065	ENSGALT00000088738	protein_coding	NO
B Cell	chrZ	+	9282571	ENSGALT00000004088	protein_coding	chrZ	-	9283017	ENSGALT00000066276	protein_coding	NO
B Cell	chrZ	+	10563504	ENSGALT00000005332	protein_coding	chrZ	-	10563411	ENSGALT00000049619	protein_coding	NO
B Cell	chrZ	+	10978966	ENSGALT00000005609	protein_coding	chrZ	-	10979460	ENSGALT00000021822	protein_coding	NO
B Cell	chrZ	+	20653927	ENSGALT00000023822	protein_coding	chrZ	-	20653718	ENSGALT00000023819	protein_coding	NO
B Cell	chrZ	+	23455305	ENSGALT00000103762	protein_coding	chrZ	-	23454784	ENSGALT00000024170	protein_coding	NO
B Cell	chrZ	+	24207081	ENSGALT00000024097	protein_coding	chrZ	-	24206407	ENSGALT00000088105	protein_coding	NO
B Cell	chrZ	+	24717662	ENSGALT00000035832	protein_coding	chrZ	-	24717639	ENSGALT00000029725	protein_coding	NO
B Cell	chrZ	+	35630700	ENSGALT00000045584	protein_coding	chrZ	-	35630494	ENSGALT00000024428	protein_coding	NO
B Cell	chrZ	+	36854752	ENSGALT00000028137	protein_coding	chrZ	-	36855645	ENSGALT00000077373	protein_coding	NO
B Cell	chrZ	+	37363153	ENSGALT00000024478	protein_coding	chrZ	-	37362663	ENSGALT00000091463	protein_coding	NO
B Cell	chrZ	+	41978719	ENSGALT00000080545	protein_coding	chrZ	-	41978652	ENSGALT00000087277	protein_coding	NO
B Cell	chrZ	+	41978977	ENSGALT00000094953	protein_coding	chrZ	-	41978652	ENSGALT00000087277	protein_coding	NO
B Cell	chrZ	+	64369090	ENSGALT00000037640	protein_coding	chrZ	-	64369042	ENSGALT00000032789	protein_coding	NO
B Cell	chrZ	+	66608736	ENSGALT00000096094	protein_coding	chrZ	-	66607870	ENSGALT00000025297	protein_coding	NO
B Cell	chrZ	+	66692893	ENSGALT00000025324	protein_coding	chrZ	-	66692579	ENSGALT00000037609	protein_coding	NO
B Cell	chrZ	+	68726663	ENSGALT00000104756	protein_coding	chrZ	-	68726346	ENSGALT00000051896	protein_coding	NO
B Cell	chrZ	+	68726663	ENSGALT00000104756	protein_coding	chrZ	-	68726436	ENSGALT00000086176	protein_coding	NO
B Cell	chrZ	+	70798088	ENSGALT00000037566	protein_coding	chrZ	-	70798064	ENSGALT00000003023	protein_coding	NO
B Cell	chrZ	+	70975840	ENSGALT00000003296	protein_coding	chrZ	-	70975777	ENSGALT00000003255	protein_coding	NO
B Cell	chrZ	+	81801033	ENSGALT00000028259	protein_coding	chrZ	-	81801734	ENSGALT00000042981	protein_coding	NO
B Cell	chrZ	+	81801717	ENSGALT00000106415	protein_coding	chrZ	-	81801734	ENSGALT00000042981	protein_coding	NO
B Cell	chr10	+	20171899	ENSGALT00000048569	protein_coding	chr10	-	20171502	ENSGALT00000048027	protein_coding	NO
B Cell	chr10	+	20171899	ENSGALT00000048569	protein_coding	chr10	-	20171462	ENSGALT00000013283	protein_coding	NO
B Cell	chr10	+	1784064	ENSGALT00000040255	protein_coding	chr10	-	1784620	ENSGALT00000003397	protein_coding	NO
B Cell	chr10	+	1784373	ENSGALT00000095164	protein_coding	chr10	-	1784620	ENSGALT00000003397	protein_coding	NO
B Cell	chr10	+	2858213	ENSGALT00000002583	protein_coding	chr10	-	2858068	ENSGALT00000051069	protein_coding	NO
B Cell	chr10	+	3153959	ENSGALT00000057059	protein_coding	chr10	-	3153415	ENSGALT00000069564	protein_coding	NO
B Cell	chr10	+	8432339	ENSGALT00000062010	protein_coding	chr10	-	8432081	ENSGALT00000053275	protein_coding	NO
B Cell	chr10	+	8432354	ENSGALT00000068179	protein_coding	chr10	-	8432081	ENSGALT00000053275	protein_coding	NO
B Cell	chr10	+	13417594	ENSGALT00000046107	protein_coding	chr10	-	13416699	ENSGALT00000010770	protein_coding	YES
B Cell	chr10	+	13615876	ENSGALT00000010970	protein_coding	chr10	-	13615857	ENSGALT00000010964	protein_coding	NO
B Cell	chr10	+	18484948	ENSGALT00000012093	protein_coding	chr10	-	18484380	ENSGALT00000047741	protein_coding	NO
B Cell	chr10	+	19311291	ENSGALT00000012837	protein_coding	chr10	-	19311088	ENSGALT00000057186	protein_coding	NO
B Cell	chr10	+	19696535	ENSGALT00000103798	protein_coding	chr10	-	19696345	ENSGALT00000074750	protein_coding	NO
B Cell	chr10	+	20485986	ENSGALT00000085779	protein_coding	chr10	-	20486357	ENSGALT00000013516	protein_coding	NO
B Cell	chr10	+	20563553	ENSGALT00000063101	protein_coding	chr10	-	20563224	ENSGALT00000022561	protein_coding	NO
B Cell	chr11	+	7578361	ENSGALT00000075864	protein_coding	chr11	-	7578698	ENSGALT00000006378	protein_coding	NO
B Cell	chr11	+	287946	ENSGALT00000073423	protein_coding	chr11	-	287908	ENSGALT00000095755	protein_coding	NO
B Cell	chr11	+	568046	ENSGALT00000074111	protein_coding	chr11	-	569012	ENSGALT00000001768	protein_coding	NO
B Cell	chr11	+	575366	ENSGALT00000063704	protein_coding	chr11	-	575366	ENSGALT00000001797	protein_coding	NO
B Cell	chr11	+	575416	ENSGALT00000065165	protein_coding	chr11	-	575366	ENSGALT00000001797	protein_coding	NO
B Cell	chr11	+	847626	ENSGALT00000002330	protein_coding	chr11	-	847606	ENSGALT00000002191	protein_coding	NO
B Cell	chr11	+	883169	ENSGALT00000061093	protein_coding	chr11	-	882843	ENSGALT00000078346	protein_coding	NO
B Cell	chr11	+	883169	ENSGALT00000061093	protein_coding	chr11	-	882868	ENSGALT00000043964	protein_coding	NO
B Cell	chr11	+	988176	ENSGALT00000002641	protein_coding	chr11	-	987407	ENSGALT00000002614	protein_coding	NO
B Cell	chr11	+	1344640	ENSGALT00000102889	protein_coding	chr11	-	1345280	ENSGALT00000012774	protein_coding	NO
B Cell	chr11	+	1950399	ENSGALT00000044050	protein_coding	chr11	-	1949555	ENSGALT00000004428	protein_coding	NO
B Cell	chr11	+	2032091	ENSGALT00000004515	protein_coding	chr11	-	2031846	ENSGALT00000004497	protein_coding	NO
B Cell	chr11	+	2155239	ENSGALT00000101967	protein_coding	chr11	-	2155667	ENSGALT00000004848	protein_coding	NO
B Cell	chr11	+	2455976	ENSGALT00000005070	protein_coding	chr11	-	2456359	ENSGALT00000005064	protein_coding	NO
B Cell	chr11	+	3379301	ENSGALT00000064818	protein_coding	chr11	-	3378444	ENSGALT00000075817	protein_coding	NO
B Cell	chr11	+	3423354	ENSGALT00000106471	protein_coding	chr11	-	3423443	ENSGALT00000005388	protein_coding	NO
B Cell	chr11	+	7826731	ENSGALT00000085464	protein_coding	chr11	-	7826803	ENSGALT00000063938	protein_coding	NO
B Cell	chr11	+	7826731	ENSGALT00000085464	protein_coding	chr11	-	7826536	ENSGALT00000006929	protein_coding	NO
B Cell	chr11	+	7826737	ENSGALT00000006976	protein_coding	chr11	-	7826803	ENSGALT00000063938	protein_coding	NO
B Cell	chr11	+	7826737	ENSGALT00000006976	protein_coding	chr11	-	7826536	ENSGALT00000006929	protein_coding	NO
B Cell	chr11	+	11193984	ENSGALT00000008241	protein_coding	chr11	-	11193897	ENSGALT00000106743	protein_coding	NO
B Cell	chr11	+	11442871	ENSGALT00000065815	protein_coding	chr11	-	11442605	ENSGALT00000101369	protein_coding	NO
B Cell	chr11	+	16837055	ENSGALT00000009065	protein_coding	chr11	-	16836168	ENSGALT00000028346	protein_coding	NO
B Cell	chr11	+	17614797	ENSGALT00000009226	protein_coding	chr11	-	17614743	ENSGALT00000086459	protein_coding	NO
B Cell	chr11	+	18433748	ENSGALT00000088082	protein_coding	chr11	-	18433726	ENSGALT00000011782	protein_coding	NO
B Cell	chr11	+	18514800	ENSGALT00000107675	protein_coding	chr11	-	18514508	ENSGALT00000078768	protein_coding	NO
B Cell	chr11	+	18760174	ENSGALT00000104684	protein_coding	chr11	-	18759263	ENSGALT00000033674	protein_coding	NO
B Cell	chr11	+	18771552	ENSGALT00000000702	protein_coding	chr11	-	18771877	ENSGALT00000038833	protein_coding	NO
B Cell	chr11	+	18933245	ENSGALT00000000923	protein_coding	chr11	-	18933187	ENSGALT00000107408	protein_coding	NO
B Cell	chr11	+	18933268	ENSGALT00000049870	protein_coding	chr11	-	18933187	ENSGALT00000107408	protein_coding	NO
B Cell	chr11	+	19042180	ENSGALT00000000991	protein_coding	chr11	-	19042055	ENSGALT00000000977	protein_coding	NO
B Cell	chr11	+	19730463	ENSGALT00000096806	protein_coding	chr11	-	19730099	ENSGALT00000086981	protein_coding	NO
B Cell	chr11	+	19730790	ENSGALT00000097123	protein_coding	chr11	-	19730099	ENSGALT00000086981	protein_coding	NO
B Cell	chr11	+	19866565	ENSGALT00000001334	protein_coding	chr11	-	19867114	ENSGALT00000001325	protein_coding	NO
B Cell	chr11	+	19867358	ENSGALT00000047563	protein_coding	chr11	-	19867114	ENSGALT00000001325	protein_coding	NO
B Cell	chr11	+	19912201	ENSGALT00000090346	protein_coding	chr11	-	19912061	ENSGALT00000096189	protein_coding	NO
B Cell	chr12	+	15721934	ENSGALT00000055861	protein_coding	chr12	-	15721052	ENSGALT00000054129	protein_coding	NO
B Cell	chr12	+	3396475	ENSGALT00000098320	protein_coding	chr12	-	3396406	ENSGALT00000036280	protein_coding	NO
B Cell	chr12	+	1100607	ENSGALT00000090006	protein_coding	chr12	-	1100520	ENSGALT00000055942	protein_coding	NO
B Cell	chr12	+	1100731	ENSGALT00000051873	protein_coding	chr12	-	1100520	ENSGALT00000055942	protein_coding	NO
B Cell	chr12	+	1180931	ENSGALT00000002526	protein_coding	chr12	-	1180455	ENSGALT00000002508	protein_coding	NO
B Cell	chr12	+	1180958	ENSGALT00000084365	protein_coding	chr12	-	1180455	ENSGALT00000002508	protein_coding	NO
B Cell	chr12	+	1720583	ENSGALT00000092002	protein_coding	chr12	-	1720511	ENSGALT00000089280	protein_coding	NO
B Cell	chr12	+	1720878	ENSGALT00000003137	protein_coding	chr12	-	1720511	ENSGALT00000089280	protein_coding	NO
B Cell	chr12	+	1720879	ENSGALT00000036292	protein_coding	chr12	-	1720511	ENSGALT00000089280	protein_coding	NO
B Cell	chr12	+	1867279	ENSGALT00000103417	protein_coding	chr12	-	1867142	ENSGALT00000003330	protein_coding	NO
B Cell	chr12	+	3015935	ENSGALT00000093107	protein_coding	chr12	-	3015929	ENSGALT00000004608	protein_coding	NO
B Cell	chr12	+	3016340	ENSGALT00000095298	protein_coding	chr12	-	3015929	ENSGALT00000004608	protein_coding	NO
B Cell	chr12	+	3201508	ENSGALT00000005931	protein_coding	chr12	-	3201908	ENSGALT00000005906	protein_coding	NO
B Cell	chr12	+	3201548	ENSGALT00000089067	protein_coding	chr12	-	3201908	ENSGALT00000005906	protein_coding	NO
B Cell	chr12	+	3371416	ENSGALT00000069748	protein_coding	chr12	-	3372272	ENSGALT00000006336	protein_coding	NO
B Cell	chr12	+	3555324	ENSGALT00000051206	protein_coding	chr12	-	3554379	ENSGALT00000007193	protein_coding	NO
B Cell	chr12	+	3862146	ENSGALT00000007571	protein_coding	chr12	-	3861939	ENSGALT00000007467	protein_coding	NO
B Cell	chr12	+	5340143	ENSGALT00000007996	protein_coding	chr12	-	5340965	ENSGALT00000043832	protein_coding	NO
B Cell	chr12	+	9552848	ENSGALT00000105347	protein_coding	chr12	-	9552794	ENSGALT00000009495	protein_coding	NO
B Cell	chr12	+	11175608	ENSGALT00000010255	protein_coding	chr12	-	11175396	ENSGALT00000010231	protein_coding	NO
B Cell	chr12	+	11881166	ENSGALT00000101849	protein_coding	chr12	-	11881077	ENSGALT00000010811	protein_coding	NO
B Cell	chr12	+	12100868	ENSGALT00000044814	protein_coding	chr12	-	12100919	ENSGALT00000063242	protein_coding	NO
B Cell	chr12	+	12100868	ENSGALT00000044814	protein_coding	chr12	-	12100517	ENSGALT00000102443	protein_coding	NO
B Cell	chr12	+	12229085	ENSGALT00000011518	protein_coding	chr12	-	12228998	ENSGALT00000048041	protein_coding	NO
B Cell	chr12	+	19859842	ENSGALT00000013716	protein_coding	chr12	-	19859990	ENSGALT00000097844	protein_coding	NO
B Cell	chr12	+	19881679	ENSGALT00000073565	protein_coding	chr12	-	19881713	ENSGALT00000096664	protein_coding	NO
B Cell	chr12	+	19881679	ENSGALT00000073565	protein_coding	chr12	-	19881504	ENSGALT00000033241	protein_coding	NO
B Cell	chr13	+	13624035	ENSGALT00000006650	protein_coding	chr13	-	13624653	ENSGALT00000099424	protein_coding	NO
B Cell	chr13	+	13624035	ENSGALT00000006650	protein_coding	chr13	-	13624639	ENSGALT00000047640	protein_coding	YES
B Cell	chr13	+	1571183	ENSGALT00000082836	protein_coding	chr13	-	1571326	ENSGALT00000064754	protein_coding	NO
B Cell	chr13	+	1603438	ENSGALT00000080586	protein_coding	chr13	-	1603346	ENSGALT00000064783	protein_coding	NO
B Cell	chr13	+	7452381	ENSGALT00000002649	protein_coding	chr13	-	7452170	ENSGALT00000070082	protein_coding	NO
B Cell	chr13	+	8632093	ENSGALT00000056623	protein_coding	chr13	-	8632025	ENSGALT00000002198	protein_coding	NO
B Cell	chr13	+	10916141	ENSGALT00000004722	protein_coding	chr13	-	10916096	ENSGALT00000004733	protein_coding	NO
B Cell	chr13	+	11113460	ENSGALT00000048189	protein_coding	chr13	-	11113445	ENSGALT00000005272	protein_coding	NO
B Cell	chr13	+	11122340	ENSGALT00000005307	protein_coding	chr13	-	11122199	ENSGALT00000005300	protein_coding	NO
B Cell	chr13	+	11127918	ENSGALT00000092473	protein_coding	chr13	-	11127201	ENSGALT00000005313	protein_coding	NO
B Cell	chr13	+	11127956	ENSGALT00000005328	protein_coding	chr13	-	11127201	ENSGALT00000005313	protein_coding	NO
B Cell	chr13	+	12720691	ENSGALT00000006272	protein_coding	chr13	-	12720567	ENSGALT00000105995	protein_coding	NO
B Cell	chr13	+	12745889	ENSGALT00000092181	protein_coding	chr13	-	12745824	ENSGALT00000084199	protein_coding	NO
B Cell	chr13	+	13735680	ENSGALT00000006949	protein_coding	chr13	-	13735808	ENSGALT00000006953	protein_coding	NO
B Cell	chr13	+	16440101	ENSGALT00000046363	protein_coding	chr13	-	16440002	ENSGALT00000010356	protein_coding	NO
B Cell	chr13	+	16440808	ENSGALT00000072726	protein_coding	chr13	-	16440002	ENSGALT00000010356	protein_coding	NO
B Cell	chr13	+	17281083	ENSGALT00000099342	protein_coding	chr13	-	17281757	ENSGALT00000069997	protein_coding	YES
B Cell	chr13	+	17680387	ENSGALT00000039902	protein_coding	chr13	-	17679532	ENSGALT00000011105	protein_coding	NO
B Cell	chr13	+	18524936	ENSGALT00000012154	protein_coding	chr13	-	18524347	ENSGALT00000012114	protein_coding	NO
B Cell	chr14	+	8116711	ENSGALT00000061062	protein_coding	chr14	-	8116502	ENSGALT00000048627	protein_coding	NO
B Cell	chr14	+	1382542	ENSGALT00000005427	protein_coding	chr14	-	1382292	ENSGALT00000005377	protein_coding	NO
B Cell	chr14	+	3479886	ENSGALT00000040967	protein_coding	chr14	-	3479865	ENSGALT00000006743	protein_coding	NO
B Cell	chr14	+	3480131	ENSGALT00000083529	protein_coding	chr14	-	3479865	ENSGALT00000006743	protein_coding	NO
B Cell	chr14	+	3740253	ENSGALT00000006938	protein_coding	chr14	-	3739905	ENSGALT00000006902	protein_coding	NO
B Cell	chr14	+	4781450	ENSGALT00000086158	protein_coding	chr14	-	4781135	ENSGALT00000057681	protein_coding	NO
B Cell	chr14	+	4781476	ENSGALT00000007493	protein_coding	chr14	-	4781135	ENSGALT00000057681	protein_coding	NO
B Cell	chr14	+	4788948	ENSGALT00000007510	protein_coding	chr14	-	4788773	ENSGALT00000007505	protein_coding	NO
B Cell	chr14	+	5153918	ENSGALT00000007729	protein_coding	chr14	-	5153495	ENSGALT00000085512	protein_coding	NO
B Cell	chr14	+	5392691	ENSGALT00000007886	protein_coding	chr14	-	5392015	ENSGALT00000007880	protein_coding	NO
B Cell	chr14	+	5476095	ENSGALT00000008014	protein_coding	chr14	-	5475958	ENSGALT00000064591	protein_coding	NO
B Cell	chr14	+	5493822	ENSGALT00000040656	protein_coding	chr14	-	5493655	ENSGALT00000079212	protein_coding	NO
B Cell	chr14	+	6389095	ENSGALT00000008518	protein_coding	chr14	-	6388772	ENSGALT00000057565	protein_coding	NO
B Cell	chr14	+	6449137	ENSGALT00000040564	protein_coding	chr14	-	6448850	ENSGALT00000049557	protein_coding	NO
B Cell	chr14	+	6542382	ENSGALT00000042600	protein_coding	chr14	-	6541961	ENSGALT00000008816	protein_coding	NO
B Cell	chr14	+	6895717	ENSGALT00000009493	protein_coding	chr14	-	6895546	ENSGALT00000009467	protein_coding	NO
B Cell	chr14	+	7288978	ENSGALT00000084564	protein_coding	chr14	-	7288943	ENSGALT00000009810	protein_coding	NO
B Cell	chr14	+	7288990	ENSGALT00000009821	protein_coding	chr14	-	7288943	ENSGALT00000009810	protein_coding	NO
B Cell	chr14	+	7322165	ENSGALT00000009880	protein_coding	chr14	-	7321981	ENSGALT00000009871	protein_coding	NO
B Cell	chr14	+	7689161	ENSGALT00000071046	protein_coding	chr14	-	7689009	ENSGALT00000010199	protein_coding	NO
B Cell	chr14	+	7823913	ENSGALT00000096336	protein_coding	chr14	-	7824137	ENSGALT00000010385	protein_coding	NO
B Cell	chr14	+	9114378	ENSGALT00000011375	protein_coding	chr14	-	9114177	ENSGALT00000046055	protein_coding	NO
B Cell	chr14	+	10461812	ENSGALT00000094927	protein_coding	chr14	-	10461151	ENSGALT00000029998	protein_coding	NO
B Cell	chr14	+	12384778	ENSGALT00000043053	protein_coding	chr14	-	12384860	ENSGALT00000028385	protein_coding	NO
B Cell	chr14	+	13131466	ENSGALT00000096935	protein_coding	chr14	-	13131446	ENSGALT00000080412	protein_coding	NO
B Cell	chr14	+	13131466	ENSGALT00000096935	protein_coding	chr14	-	13131792	ENSGALT00000067660	protein_coding	NO
B Cell	chr14	+	13610664	ENSGALT00000003589	protein_coding	chr14	-	13610327	ENSGALT00000003641	protein_coding	NO
B Cell	chr14	+	13610664	ENSGALT00000003589	protein_coding	chr14	-	13610299	ENSGALT00000100233	protein_coding	NO
B Cell	chr14	+	13627364	ENSGALT00000046040	protein_coding	chr14	-	13627020	ENSGALT00000003569	protein_coding	NO
B Cell	chr14	+	13627382	ENSGALT00000086038	protein_coding	chr14	-	13627020	ENSGALT00000003569	protein_coding	NO
B Cell	chr14	+	13797491	ENSGALT00000003162	protein_coding	chr14	-	13797471	ENSGALT00000003178	protein_coding	NO
B Cell	chr14	+	14737249	ENSGALT00000079277	protein_coding	chr14	-	14736601	ENSGALT00000002763	protein_coding	NO
B Cell	chr14	+	14737251	ENSGALT00000086311	protein_coding	chr14	-	14736601	ENSGALT00000002763	protein_coding	NO
B Cell	chr14	+	15224074	ENSGALT00000003504	protein_coding	chr14	-	15223593	ENSGALT00000091957	protein_coding	NO
B Cell	chr14	+	15224074	ENSGALT00000003504	protein_coding	chr14	-	15224073	ENSGALT00000045747	protein_coding	NO
B Cell	chr14	+	15263225	ENSGALT00000003565	protein_coding	chr14	-	15263173	ENSGALT00000080718	protein_coding	NO
B Cell	chr14	+	15382193	ENSGALT00000003923	protein_coding	chr14	-	15382016	ENSGALT00000087787	protein_coding	NO
B Cell	chr15	+	5240729	ENSGALT00000005160	protein_coding	chr15	-	5240703	ENSGALT00000039540	protein_coding	NO
B Cell	chr15	+	387834	ENSGALT00000062710	protein_coding	chr15	-	387640	ENSGALT00000067719	protein_coding	NO
B Cell	chr15	+	5504461	ENSGALT00000005860	protein_coding	chr15	-	5504141	ENSGALT00000005840	protein_coding	NO
B Cell	chr15	+	6682822	ENSGALT00000007704	protein_coding	chr15	-	6682601	ENSGALT00000089441	protein_coding	NO
B Cell	chr15	+	6682822	ENSGALT00000007704	protein_coding	chr15	-	6682558	ENSGALT00000086744	protein_coding	NO
B Cell	chr15	+	7068521	ENSGALT00000022468	protein_coding	chr15	-	7068108	ENSGALT00000081175	protein_coding	NO
B Cell	chr15	+	9566470	ENSGALT00000011635	protein_coding	chr15	-	9565829	ENSGALT00000087846	protein_coding	NO
B Cell	chr15	+	967723	ENSGALT00000002464	protein_coding	chr15	-	967346	ENSGALT00000034831	protein_coding	NO
B Cell	chr15	+	1326280	ENSGALT00000098425	protein_coding	chr15	-	1327211	ENSGALT00000107088	protein_coding	NO
B Cell	chr15	+	1604918	ENSGALT00000003289	protein_coding	chr15	-	1604407	ENSGALT00000003266	protein_coding	NO
B Cell	chr15	+	5282072	ENSGALT00000039467	protein_coding	chr15	-	5281901	ENSGALT00000099855	protein_coding	NO
B Cell	chr15	+	5356425	ENSGALT00000096111	protein_coding	chr15	-	5356086	ENSGALT00000083825	protein_coding	NO
B Cell	chr15	+	5572878	ENSGALT00000085679	protein_coding	chr15	-	5572747	ENSGALT00000053318	protein_coding	NO
B Cell	chr15	+	5989098	ENSGALT00000006943	protein_coding	chr15	-	5988616	ENSGALT00000006930	protein_coding	NO
B Cell	chr15	+	6242877	ENSGALT00000098008	protein_coding	chr15	-	6242687	ENSGALT00000086581	protein_coding	NO
B Cell	chr15	+	6242877	ENSGALT00000098008	protein_coding	chr15	-	6242716	ENSGALT00000039111	protein_coding	NO
B Cell	chr15	+	6514817	ENSGALT00000007562	protein_coding	chr15	-	6514166	ENSGALT00000007407	protein_coding	NO
B Cell	chr15	+	7445259	ENSGALT00000009009	protein_coding	chr15	-	7445818	ENSGALT00000008976	protein_coding	NO
B Cell	chr15	+	8226764	ENSGALT00000106599	protein_coding	chr15	-	8226506	ENSGALT00000106076	protein_coding	NO
B Cell	chr15	+	8582951	ENSGALT00000097021	protein_coding	chr15	-	8582523	ENSGALT00000010365	protein_coding	NO
B Cell	chr15	+	8719647	ENSGALT00000010666	protein_coding	chr15	-	8719468	ENSGALT00000010647	protein_coding	NO
B Cell	chr15	+	9214523	ENSGALT00000011126	protein_coding	chr15	-	9214453	ENSGALT00000011065	protein_coding	NO
B Cell	chr15	+	9578708	ENSGALT00000011652	protein_coding	chr15	-	9578666	ENSGALT00000011648	protein_coding	NO
B Cell	chr15	+	10179816	ENSGALT00000055855	protein_coding	chr15	-	10179073	ENSGALT00000084750	protein_coding	NO
B Cell	chr15	+	11069470	ENSGALT00000012619	protein_coding	chr15	-	11070122	ENSGALT00000101641	protein_coding	NO
B Cell	chr15	+	11099232	ENSGALT00000064617	protein_coding	chr15	-	11099116	ENSGALT00000051515	protein_coding	NO
B Cell	chr15	+	11321486	ENSGALT00000054614	protein_coding	chr15	-	11321105	ENSGALT00000013095	protein_coding	NO
B Cell	chr16	+	1974067	ENSGALT00000097213	protein_coding	chr16	-	1973720	ENSGALT00000092520	protein_coding	NO
B Cell	chr16	+	2529851	ENSGALT00000100703	protein_coding	chr16	-	2529817	ENSGALT00000000171	protein_coding	NO
B Cell	chr17	+	1953839	ENSGALT00000040268	protein_coding	chr17	-	1953399	ENSGALT00000096854	protein_coding	NO
B Cell	chr17	+	5366371	ENSGALT00000106783	protein_coding	chr17	-	5366335	ENSGALT00000105432	protein_coding	NO
B Cell	chr17	+	9117854	ENSGALT00000001858	protein_coding	chr17	-	9117979	ENSGALT00000063306	protein_coding	NO
B Cell	chr17	+	1844728	ENSGALT00000091298	protein_coding	chr17	-	1844590	ENSGALT00000014388	protein_coding	NO
B Cell	chr17	+	1924725	ENSGALT00000014314	protein_coding	chr17	-	1925313	ENSGALT00000014334	protein_coding	NO
B Cell	chr17	+	1924904	ENSGALT00000067722	protein_coding	chr17	-	1925313	ENSGALT00000014334	protein_coding	NO
B Cell	chr17	+	1931675	ENSGALT00000014303	protein_coding	chr17	-	1931386	ENSGALT00000065208	protein_coding	NO
B Cell	chr17	+	2152581	ENSGALT00000014053	protein_coding	chr17	-	2152517	ENSGALT00000094798	protein_coding	NO
B Cell	chr17	+	5276315	ENSGALT00000095589	protein_coding	chr17	-	5275754	ENSGALT00000082010	protein_coding	NO
B Cell	chr17	+	5476113	ENSGALT00000067893	protein_coding	chr17	-	5475502	ENSGALT00000007637	protein_coding	NO
B Cell	chr17	+	6008700	ENSGALT00000072855	protein_coding	chr17	-	6008708	ENSGALT00000006601	protein_coding	NO
B Cell	chr17	+	6537267	ENSGALT00000101318	protein_coding	chr17	-	6537248	ENSGALT00000005921	protein_coding	NO
B Cell	chr17	+	6935884	ENSGALT00000079382	protein_coding	chr17	-	6935800	ENSGALT00000054949	protein_coding	NO
B Cell	chr17	+	7165126	ENSGALT00000087416	protein_coding	chr17	-	7165164	ENSGALT00000005076	protein_coding	NO
B Cell	chr17	+	7165292	ENSGALT00000085391	protein_coding	chr17	-	7165164	ENSGALT00000005076	protein_coding	NO
B Cell	chr17	+	7172767	ENSGALT00000034772	protein_coding	chr17	-	7172719	ENSGALT00000050043	protein_coding	NO
B Cell	chr17	+	7240345	ENSGALT00000093690	protein_coding	chr17	-	7240174	ENSGALT00000096983	protein_coding	NO
B Cell	chr17	+	9045272	ENSGALT00000002038	protein_coding	chr17	-	9045434	ENSGALT00000044500	protein_coding	NO
B Cell	chr17	+	9887674	ENSGALT00000057653	protein_coding	chr17	-	9888343	ENSGALT00000001495	protein_coding	NO
B Cell	chr17	+	10683004	ENSGALT00000001251	protein_coding	chr17	-	10682819	ENSGALT00000001266	protein_coding	NO
B Cell	chr18	+	10451563	ENSGALT00000012560	protein_coding	chr18	-	10451391	ENSGALT00000051232	protein_coding	NO
B Cell	chr18	+	3514704	ENSGALT00000093480	protein_coding	chr18	-	3514650	ENSGALT00000060628	protein_coding	NO
B Cell	chr18	+	4318351	ENSGALT00000105470	protein_coding	chr18	-	4319187	ENSGALT00000074623	protein_coding	NO
B Cell	chr18	+	4716746	ENSGALT00000003634	protein_coding	chr18	-	4715902	ENSGALT00000086962	protein_coding	NO
B Cell	chr18	+	4976514	ENSGALT00000004482	protein_coding	chr18	-	4976221	ENSGALT00000004462	protein_coding	NO
B Cell	chr18	+	693630	ENSGALT00000081425	protein_coding	chr18	-	694323	ENSGALT00000091102	protein_coding	NO
B Cell	chr18	+	693630	ENSGALT00000081425	protein_coding	chr18	-	693716	ENSGALT00000048912	protein_coding	NO
B Cell	chr18	+	4241335	ENSGALT00000028041	protein_coding	chr18	-	4240761	ENSGALT00000002733	protein_coding	NO
B Cell	chr18	+	4241341	ENSGALT00000107499	protein_coding	chr18	-	4240761	ENSGALT00000002733	protein_coding	NO
B Cell	chr18	+	4247801	ENSGALT00000002784	protein_coding	chr18	-	4247698	ENSGALT00000002759	protein_coding	NO
B Cell	chr18	+	4777174	ENSGALT00000003814	protein_coding	chr18	-	4777163	ENSGALT00000003804	protein_coding	NO
B Cell	chr18	+	4777174	ENSGALT00000003814	protein_coding	chr18	-	4777131	ENSGALT00000105451	protein_coding	NO
B Cell	chr18	+	5003713	ENSGALT00000100993	protein_coding	chr18	-	5003643	ENSGALT00000004537	protein_coding	NO
B Cell	chr18	+	5003739	ENSGALT00000081903	protein_coding	chr18	-	5003643	ENSGALT00000004537	protein_coding	NO
B Cell	chr18	+	5095893	ENSGALT00000004723	protein_coding	chr18	-	5096291	ENSGALT00000100201	protein_coding	YES
B Cell	chr18	+	6293717	ENSGALT00000005054	protein_coding	chr18	-	6292800	ENSGALT00000096907	protein_coding	NO
B Cell	chr18	+	6621920	ENSGALT00000005217	protein_coding	chr18	-	6621449	ENSGALT00000005193	protein_coding	NO
B Cell	chr18	+	7752308	ENSGALT00000062757	protein_coding	chr18	-	7752120	ENSGALT00000070815	protein_coding	NO
B Cell	chr18	+	8993694	ENSGALT00000103470	protein_coding	chr18	-	8992851	ENSGALT00000073416	protein_coding	NO
B Cell	chr18	+	9255821	ENSGALT00000087964	protein_coding	chr18	-	9255426	ENSGALT00000066963	protein_coding	NO
B Cell	chr18	+	9542783	ENSGALT00000011369	protein_coding	chr18	-	9542135	ENSGALT00000065862	protein_coding	NO
B Cell	chr18	+	9750312	ENSGALT00000019296	protein_coding	chr18	-	9750371	ENSGALT00000019290	protein_coding	NO
B Cell	chr18	+	9755069	ENSGALT00000106320	protein_coding	chr18	-	9754319	ENSGALT00000107490	protein_coding	NO
B Cell	chr18	+	9837553	ENSGALT00000043264	protein_coding	chr18	-	9837087	ENSGALT00000011630	protein_coding	NO
B Cell	chr18	+	9866478	ENSGALT00000056355	protein_coding	chr18	-	9865580	ENSGALT00000044230	protein_coding	NO
B Cell	chr18	+	9879270	ENSGALT00000011691	protein_coding	chr18	-	9879591	ENSGALT00000107828	protein_coding	NO
B Cell	chr18	+	10130825	ENSGALT00000011948	protein_coding	chr18	-	10130095	ENSGALT00000038316	protein_coding	NO
B Cell	chr18	+	10130825	ENSGALT00000011948	protein_coding	chr18	-	10129996	ENSGALT00000067593	protein_coding	NO
B Cell	chr18	+	10388534	ENSGALT00000051789	protein_coding	chr18	-	10388380	ENSGALT00000012444	protein_coding	NO
B Cell	chr18	+	10626967	ENSGALT00000012890	protein_coding	chr18	-	10627074	ENSGALT00000084498	protein_coding	NO
B Cell	chr18	+	10717881	ENSGALT00000080909	protein_coding	chr18	-	10717873	ENSGALT00000012976	protein_coding	NO
B Cell	chr18	+	10717892	ENSGALT00000085665	protein_coding	chr18	-	10717873	ENSGALT00000012976	protein_coding	NO
B Cell	chr19	+	7073887	ENSGALT00000039370	protein_coding	chr19	-	7073816	ENSGALT00000007658	protein_coding	NO
B Cell	chr19	+	7456616	ENSGALT00000008286	protein_coding	chr19	-	7456543	ENSGALT00000008268	protein_coding	NO
B Cell	chr19	+	9953042	ENSGALT00000091052	protein_coding	chr19	-	9952624	ENSGALT00000043725	protein_coding	NO
B Cell	chr19	+	281709	ENSGALT00000055327	protein_coding	chr19	-	282247	ENSGALT00000101913	protein_coding	NO
B Cell	chr19	+	2998205	ENSGALT00000047466	protein_coding	chr19	-	2997563	ENSGALT00000092850	protein_coding	NO
B Cell	chr19	+	3033037	ENSGALT00000106054	protein_coding	chr19	-	3033581	ENSGALT00000085309	protein_coding	NO
B Cell	chr19	+	3033037	ENSGALT00000106054	protein_coding	chr19	-	3033575	ENSGALT00000001999	protein_coding	NO
B Cell	chr19	+	3033283	ENSGALT00000082376	protein_coding	chr19	-	3033581	ENSGALT00000085309	protein_coding	NO
B Cell	chr19	+	3033283	ENSGALT00000082376	protein_coding	chr19	-	3033575	ENSGALT00000001999	protein_coding	NO
B Cell	chr19	+	3356516	ENSGALT00000002350	protein_coding	chr19	-	3356233	ENSGALT00000088839	protein_coding	NO
B Cell	chr19	+	3584185	ENSGALT00000082979	protein_coding	chr19	-	3584062	ENSGALT00000002552	protein_coding	NO
B Cell	chr19	+	5568656	ENSGALT00000004849	protein_coding	chr19	-	5568555	ENSGALT00000004795	protein_coding	NO
B Cell	chr19	+	5568656	ENSGALT00000004849	protein_coding	chr19	-	5568543	ENSGALT00000098433	protein_coding	NO
B Cell	chr19	+	5765093	ENSGALT00000004993	protein_coding	chr19	-	5764779	ENSGALT00000084999	protein_coding	NO
B Cell	chr19	+	5783013	ENSGALT00000039767	protein_coding	chr19	-	5782898	ENSGALT00000005087	protein_coding	NO
B Cell	chr19	+	5949675	ENSGALT00000006318	protein_coding	chr19	-	5949553	ENSGALT00000089007	protein_coding	NO
B Cell	chr19	+	6800174	ENSGALT00000007388	protein_coding	chr19	-	6800086	ENSGALT00000007373	protein_coding	NO
B Cell	chr19	+	7528762	ENSGALT00000008348	protein_coding	chr19	-	7528589	ENSGALT00000066374	protein_coding	NO
B Cell	chr19	+	8290810	ENSGALT00000039163	protein_coding	chr19	-	8290252	ENSGALT00000090994	protein_coding	NO
B Cell	chr19	+	9451329	ENSGALT00000009169	protein_coding	chr19	-	9451267	ENSGALT00000086153	protein_coding	NO
B Cell	chr20	+	830534	ENSGALT00000106163	protein_coding	chr20	-	830245	ENSGALT00000002165	protein_coding	NO
B Cell	chr20	+	1063265	ENSGALT00000099697	protein_coding	chr20	-	1063406	ENSGALT00000044811	protein_coding	NO
B Cell	chr20	+	1063265	ENSGALT00000099697	protein_coding	chr20	-	1063972	ENSGALT00000085125	protein_coding	NO
B Cell	chr20	+	1063493	ENSGALT00000002384	protein_coding	chr20	-	1063406	ENSGALT00000044811	protein_coding	NO
B Cell	chr20	+	1063493	ENSGALT00000002384	protein_coding	chr20	-	1063972	ENSGALT00000085125	protein_coding	NO
B Cell	chr20	+	2166139	ENSGALT00000004812	protein_coding	chr20	-	2166147	ENSGALT00000056181	protein_coding	NO
B Cell	chr20	+	5224027	ENSGALT00000075646	protein_coding	chr20	-	5224532	ENSGALT00000006521	protein_coding	NO
B Cell	chr20	+	5493044	ENSGALT00000088385	protein_coding	chr20	-	5492828	ENSGALT00000099986	protein_coding	NO
B Cell	chr20	+	9629099	ENSGALT00000009849	protein_coding	chr20	-	9628621	ENSGALT00000009828	protein_coding	NO
B Cell	chr20	+	10401917	ENSGALT00000097681	protein_coding	chr20	-	10402171	ENSGALT00000010979	protein_coding	NO
B Cell	chr20	+	10401969	ENSGALT00000099850	protein_coding	chr20	-	10402171	ENSGALT00000010979	protein_coding	NO
B Cell	chr20	+	10518703	ENSGALT00000011080	protein_coding	chr20	-	10518982	ENSGALT00000011074	protein_coding	NO
B Cell	chr20	+	10528829	ENSGALT00000084248	protein_coding	chr20	-	10528418	ENSGALT00000011088	protein_coding	NO
B Cell	chr20	+	10750390	ENSGALT00000063653	protein_coding	chr20	-	10750358	ENSGALT00000011725	protein_coding	NO
B Cell	chr20	+	10886027	ENSGALT00000100763	protein_coding	chr20	-	10885745	ENSGALT00000069012	protein_coding	NO
B Cell	chr20	+	11230796	ENSGALT00000099101	protein_coding	chr20	-	11230580	ENSGALT00000012215	protein_coding	NO
B Cell	chr20	+	12020473	ENSGALT00000033524	protein_coding	chr20	-	12019585	ENSGALT00000012577	protein_coding	NO
B Cell	chr20	+	13384758	ENSGALT00000028050	protein_coding	chr20	-	13384664	ENSGALT00000012964	protein_coding	NO
B Cell	chr20	+	13801178	ENSGALT00000013022	protein_coding	chr20	-	13801015	ENSGALT00000013014	protein_coding	NO
B Cell	chr21	+	270997	ENSGALT00000092014	protein_coding	chr21	-	271456	ENSGALT00000057068	protein_coding	NO
B Cell	chr21	+	270997	ENSGALT00000092014	protein_coding	chr21	-	271465	ENSGALT00000083827	protein_coding	NO
B Cell	chr21	+	271634	ENSGALT00000096352	protein_coding	chr21	-	271456	ENSGALT00000057068	protein_coding	NO
B Cell	chr21	+	271634	ENSGALT00000096352	protein_coding	chr21	-	271465	ENSGALT00000083827	protein_coding	NO
B Cell	chr21	+	539940	ENSGALT00000000891	protein_coding	chr21	-	539804	ENSGALT00000069096	protein_coding	NO
B Cell	chr21	+	642544	ENSGALT00000085554	protein_coding	chr21	-	642463	ENSGALT00000063844	protein_coding	NO
B Cell	chr21	+	923772	ENSGALT00000001445	protein_coding	chr21	-	923687	ENSGALT00000053627	protein_coding	NO
B Cell	chr21	+	2008844	ENSGALT00000002094	protein_coding	chr21	-	2008534	ENSGALT00000098813	protein_coding	NO
B Cell	chr21	+	2344912	ENSGALT00000002586	protein_coding	chr21	-	2344883	ENSGALT00000043464	protein_coding	NO
B Cell	chr21	+	2535879	ENSGALT00000002907	protein_coding	chr21	-	2535226	ENSGALT00000002878	protein_coding	NO
B Cell	chr21	+	4673990	ENSGALT00000006360	protein_coding	chr21	-	4673877	ENSGALT00000049283	protein_coding	NO
B Cell	chr21	+	4680511	ENSGALT00000068441	protein_coding	chr21	-	4680371	ENSGALT00000006382	protein_coding	NO
B Cell	chr21	+	4924612	ENSGALT00000002085	protein_coding	chr21	-	4924567	ENSGALT00000061536	protein_coding	NO
B Cell	chr21	+	5605265	ENSGALT00000007342	protein_coding	chr21	-	5605153	ENSGALT00000007303	protein_coding	NO
B Cell	chr21	+	6377331	ENSGALT00000007719	protein_coding	chr21	-	6377167	ENSGALT00000007659	protein_coding	NO
B Cell	chr22	+	3666802	ENSGALT00000046993	protein_coding	chr22	-	3667638	ENSGALT00000054933	protein_coding	NO
B Cell	chr22	+	3667658	ENSGALT00000057339	protein_coding	chr22	-	3667638	ENSGALT00000054933	protein_coding	NO
B Cell	chr22	+	479244	ENSGALT00000083492	protein_coding	chr22	-	478794	ENSGALT00000070522	protein_coding	NO
B Cell	chr22	+	2584891	ENSGALT00000005150	protein_coding	chr22	-	2584747	ENSGALT00000005131	protein_coding	NO
B Cell	chr22	+	3736304	ENSGALT00000099731	protein_coding	chr22	-	3736404	ENSGALT00000100759	protein_coding	NO
B Cell	chr22	+	3867464	ENSGALT00000048490	protein_coding	chr22	-	3867074	ENSGALT00000049628	protein_coding	NO
B Cell	chr22	+	4138674	ENSGALT00000022505	protein_coding	chr22	-	4138534	ENSGALT00000022506	protein_coding	NO
B Cell	chr22	+	4138674	ENSGALT00000022505	protein_coding	chr22	-	4138607	ENSGALT00000070589	protein_coding	NO
B Cell	chr22	+	5327889	ENSGALT00000088790	protein_coding	chr22	-	5327645	ENSGALT00000048002	protein_coding	NO
B Cell	chr23	+	108888	ENSGALT00000101941	protein_coding	chr23	-	108811	ENSGALT00000092291	protein_coding	NO
B Cell	chr23	+	689565	ENSGALT00000083743	protein_coding	chr23	-	689421	ENSGALT00000041219	protein_coding	NO
B Cell	chr23	+	1574040	ENSGALT00000001053	protein_coding	chr23	-	1573848	ENSGALT00000001050	protein_coding	NO
B Cell	chr23	+	1656007	ENSGALT00000077074	protein_coding	chr23	-	1655740	ENSGALT00000001147	protein_coding	NO
B Cell	chr23	+	2392657	ENSGALT00000044183	protein_coding	chr23	-	2393352	ENSGALT00000073836	protein_coding	YES
B Cell	chr23	+	2392657	ENSGALT00000044183	protein_coding	chr23	-	2393140	ENSGALT00000068522	protein_coding	NO
B Cell	chr23	+	2392657	ENSGALT00000044183	protein_coding	chr23	-	2393060	ENSGALT00000046999	protein_coding	NO
B Cell	chr23	+	2405090	ENSGALT00000092651	protein_coding	chr23	-	2404208	ENSGALT00000103897	protein_coding	NO
B Cell	chr23	+	2551023	ENSGALT00000068027	protein_coding	chr23	-	2550924	ENSGALT00000075558	protein_coding	NO
B Cell	chr23	+	3380884	ENSGALT00000104096	protein_coding	chr23	-	3380844	ENSGALT00000053717	protein_coding	NO
B Cell	chr23	+	3639623	ENSGALT00000062100	protein_coding	chr23	-	3639204	ENSGALT00000002281	protein_coding	NO
B Cell	chr23	+	5030788	ENSGALT00000050934	protein_coding	chr23	-	5030095	ENSGALT00000043674	protein_coding	NO
B Cell	chr23	+	5303935	ENSGALT00000049065	protein_coding	chr23	-	5303894	ENSGALT00000088511	protein_coding	NO
B Cell	chr23	+	5303935	ENSGALT00000049065	protein_coding	chr23	-	5304088	ENSGALT00000005281	protein_coding	NO
B Cell	chr23	+	5348859	ENSGALT00000095052	protein_coding	chr23	-	5348814	ENSGALT00000090005	protein_coding	NO
B Cell	chr23	+	5376040	ENSGALT00000005575	protein_coding	chr23	-	5375189	ENSGALT00000083550	protein_coding	NO
B Cell	chr23	+	5376040	ENSGALT00000005575	protein_coding	chr23	-	5376872	ENSGALT00000097257	protein_coding	NO
B Cell	chr23	+	5376040	ENSGALT00000005575	protein_coding	chr23	-	5376144	ENSGALT00000005560	protein_coding	NO
B Cell	chr23	+	5376538	ENSGALT00000093495	protein_coding	chr23	-	5376872	ENSGALT00000097257	protein_coding	NO
B Cell	chr23	+	5376538	ENSGALT00000093495	protein_coding	chr23	-	5376144	ENSGALT00000005560	protein_coding	NO
B Cell	chr23	+	5476661	ENSGALT00000090762	protein_coding	chr23	-	5477371	ENSGALT00000005690	protein_coding	NO
B Cell	chr23	+	5714103	ENSGALT00000050816	protein_coding	chr23	-	5713960	ENSGALT00000006269	protein_coding	NO
B Cell	chr24	+	428136	ENSGALT00000046807	protein_coding	chr24	-	428965	ENSGALT00000084815	protein_coding	NO
B Cell	chr24	+	445575	ENSGALT00000046476	protein_coding	chr24	-	445401	ENSGALT00000085184	protein_coding	NO
B Cell	chr24	+	2575316	ENSGALT00000002312	protein_coding	chr24	-	2574831	ENSGALT00000002261	protein_coding	NO
B Cell	chr24	+	2590527	ENSGALT00000002366	protein_coding	chr24	-	2590683	ENSGALT00000089258	protein_coding	NO
B Cell	chr24	+	5255668	ENSGALT00000060297	protein_coding	chr24	-	5255186	ENSGALT00000050114	protein_coding	NO
B Cell	chr24	+	5490619	ENSGALT00000076671	protein_coding	chr24	-	5489779	ENSGALT00000094259	protein_coding	NO
B Cell	chr24	+	5490619	ENSGALT00000076671	protein_coding	chr24	-	5489870	ENSGALT00000011998	protein_coding	NO
B Cell	chr24	+	5513390	ENSGALT00000085645	protein_coding	chr24	-	5513204	ENSGALT00000012021	protein_coding	NO
B Cell	chr24	+	5665121	ENSGALT00000012488	protein_coding	chr24	-	5665784	ENSGALT00000012476	protein_coding	NO
B Cell	chr24	+	6183190	ENSGALT00000103144	protein_coding	chr24	-	6183667	ENSGALT00000012801	protein_coding	NO
B Cell	chr25	+	1436841	ENSGALT00000097317	protein_coding	chr25	-	1436821	ENSGALT00000098340	protein_coding	NO
B Cell	chr25	+	161089	ENSGALT00000001109	protein_coding	chr25	-	160813	ENSGALT00000086284	protein_coding	NO
B Cell	chr25	+	480297	ENSGALT00000044403	protein_coding	chr25	-	480199	ENSGALT00000050745	protein_coding	NO
B Cell	chr25	+	1550188	ENSGALT00000067623	protein_coding	chr25	-	1550485	ENSGALT00000072558	protein_coding	NO
B Cell	chr25	+	2407632	ENSGALT00000014892	protein_coding	chr25	-	2407537	ENSGALT00000040760	protein_coding	NO
B Cell	chr25	+	2602870	ENSGALT00000089791	protein_coding	chr25	-	2602505	ENSGALT00000043691	protein_coding	NO
B Cell	chr25	+	2626868	ENSGALT00000083319	protein_coding	chr25	-	2626380	ENSGALT00000000804	protein_coding	NO
B Cell	chr25	+	2949572	ENSGALT00000004270	protein_coding	chr25	-	2949623	ENSGALT00000063528	protein_coding	NO
B Cell	chr25	+	3955646	ENSGALT00000058523	protein_coding	chr25	-	3955011	ENSGALT00000046260	protein_coding	NO
B Cell	chr26	+	2618672	ENSGALT00000001686	protein_coding	chr26	-	2619004	ENSGALT00000064315	protein_coding	NO
B Cell	chr26	+	3533311	ENSGALT00000056559	protein_coding	chr26	-	3533199	ENSGALT00000002337	protein_coding	NO
B Cell	chr26	+	1544509	ENSGALT00000063478	protein_coding	chr26	-	1544102	ENSGALT00000054845	protein_coding	NO
B Cell	chr26	+	1544525	ENSGALT00000085126	protein_coding	chr26	-	1544102	ENSGALT00000054845	protein_coding	NO
B Cell	chr26	+	1678656	ENSGALT00000000190	protein_coding	chr26	-	1679287	ENSGALT00000094313	protein_coding	NO
B Cell	chr26	+	2516994	ENSGALT00000001265	protein_coding	chr26	-	2516979	ENSGALT00000001255	protein_coding	NO
B Cell	chr26	+	3215546	ENSGALT00000002207	protein_coding	chr26	-	3216013	ENSGALT00000053742	protein_coding	NO
B Cell	chr26	+	3770396	ENSGALT00000045280	protein_coding	chr26	-	3770521	ENSGALT00000057570	protein_coding	NO
B Cell	chr26	+	4130377	ENSGALT00000004168	protein_coding	chr26	-	4129739	ENSGALT00000004145	protein_coding	NO
B Cell	chr26	+	4272222	ENSGALT00000004314	protein_coding	chr26	-	4271626	ENSGALT00000004295	protein_coding	NO
B Cell	chr26	+	4722843	ENSGALT00000097948	protein_coding	chr26	-	4722373	ENSGALT00000005111	protein_coding	NO
B Cell	chr26	+	4965878	ENSGALT00000043763	protein_coding	chr26	-	4965400	ENSGALT00000102685	protein_coding	NO
B Cell	chr26	+	5026433	ENSGALT00000005492	protein_coding	chr26	-	5026376	ENSGALT00000005500	protein_coding	NO
B Cell	chr27	+	5759635	ENSGALT00000016159	protein_coding	chr27	-	5759564	ENSGALT00000102118	protein_coding	NO
B Cell	chr27	+	5760355	ENSGALT00000071545	protein_coding	chr27	-	5759564	ENSGALT00000102118	protein_coding	NO
B Cell	chr27	+	7990869	ENSGALT00000004366	protein_coding	chr27	-	7990457	ENSGALT00000004392	protein_coding	NO
B Cell	chr27	+	3631522	ENSGALT00000072103	protein_coding	chr27	-	3631332	ENSGALT00000001509	protein_coding	NO
B Cell	chr27	+	5225377	ENSGALT00000000811	protein_coding	chr27	-	5225187	ENSGALT00000000783	protein_coding	NO
B Cell	chr27	+	5900472	ENSGALT00000059066	protein_coding	chr27	-	5900399	ENSGALT00000052825	protein_coding	NO
B Cell	chr27	+	6118077	ENSGALT00000002317	protein_coding	chr27	-	6117913	ENSGALT00000081747	protein_coding	NO
B Cell	chr27	+	6468626	ENSGALT00000078023	protein_coding	chr27	-	6468426	ENSGALT00000028252	protein_coding	NO
B Cell	chr27	+	7510371	ENSGALT00000005735	protein_coding	chr27	-	7510219	ENSGALT00000107670	protein_coding	NO
B Cell	chr27	+	7510371	ENSGALT00000005735	protein_coding	chr27	-	7509867	ENSGALT00000005786	protein_coding	NO
B Cell	chr27	+	7510371	ENSGALT00000005735	protein_coding	chr27	-	7510246	ENSGALT00000095514	protein_coding	NO
B Cell	chr27	+	7544944	ENSGALT00000005488	protein_coding	chr27	-	7545007	ENSGALT00000039950	protein_coding	NO
B Cell	chr27	+	7577986	ENSGALT00000044950	protein_coding	chr27	-	7578198	ENSGALT00000075442	protein_coding	NO
B Cell	chr27	+	7802136	ENSGALT00000063807	protein_coding	chr27	-	7801973	ENSGALT00000107559	protein_coding	NO
B Cell	chr27	+	7879740	ENSGALT00000087871	protein_coding	chr27	-	7879921	ENSGALT00000004706	protein_coding	NO
B Cell	chr27	+	7880081	ENSGALT00000039775	protein_coding	chr27	-	7879921	ENSGALT00000004706	protein_coding	NO
B Cell	chr27	+	7914429	ENSGALT00000004510	protein_coding	chr27	-	7914343	ENSGALT00000097881	protein_coding	NO
B Cell	chr27	+	7914429	ENSGALT00000004510	protein_coding	chr27	-	7914307	ENSGALT00000051455	protein_coding	NO
B Cell	chr28	+	3273639	ENSGALT00000060660	protein_coding	chr28	-	3274298	ENSGALT00000097870	protein_coding	NO
B Cell	chr28	+	3402521	ENSGALT00000065525	protein_coding	chr28	-	3401884	ENSGALT00000065904	protein_coding	NO
B Cell	chr28	+	118449	ENSGALT00000073897	protein_coding	chr28	-	118382	ENSGALT00000107043	protein_coding	NO
B Cell	chr28	+	659799	ENSGALT00000000587	protein_coding	chr28	-	659581	ENSGALT00000000555	protein_coding	NO
B Cell	chr28	+	983592	ENSGALT00000000895	protein_coding	chr28	-	983363	ENSGALT00000107789	protein_coding	NO
B Cell	chr28	+	1081502	ENSGALT00000001057	protein_coding	chr28	-	1081935	ENSGALT00000045101	protein_coding	NO
B Cell	chr28	+	1181750	ENSGALT00000068455	protein_coding	chr28	-	1181306	ENSGALT00000087387	protein_coding	NO
B Cell	chr28	+	1436070	ENSGALT00000102592	protein_coding	chr28	-	1436103	ENSGALT00000020974	protein_coding	NO
B Cell	chr28	+	1454528	ENSGALT00000003015	protein_coding	chr28	-	1454067	ENSGALT00000021807	protein_coding	NO
B Cell	chr28	+	2185438	ENSGALT00000047030	protein_coding	chr28	-	2184537	ENSGALT00000076799	protein_coding	NO
B Cell	chr28	+	2605858	ENSGALT00000085614	protein_coding	chr28	-	2605473	ENSGALT00000001690	protein_coding	NO
B Cell	chr28	+	3034832	ENSGALT00000101021	protein_coding	chr28	-	3034572	ENSGALT00000004080	protein_coding	NO
B Cell	chr28	+	3035011	ENSGALT00000035078	protein_coding	chr28	-	3034572	ENSGALT00000004080	protein_coding	NO
B Cell	chr28	+	3672330	ENSGALT00000069337	protein_coding	chr28	-	3672270	ENSGALT00000066524	protein_coding	NO
B Cell	chr28	+	3672346	ENSGALT00000023513	protein_coding	chr28	-	3672270	ENSGALT00000066524	protein_coding	NO
B Cell	chr28	+	3761764	ENSGALT00000004817	protein_coding	chr28	-	3761970	ENSGALT00000004779	protein_coding	NO
B Cell	chr28	+	3761990	ENSGALT00000102953	protein_coding	chr28	-	3761970	ENSGALT00000004779	protein_coding	NO
B Cell	chr28	+	3824580	ENSGALT00000004991	protein_coding	chr28	-	3824430	ENSGALT00000004949	protein_coding	NO
B Cell	chr28	+	3824580	ENSGALT00000004991	protein_coding	chr28	-	3824429	ENSGALT00000060270	protein_coding	NO
B Cell	chr28	+	3867328	ENSGALT00000095118	protein_coding	chr28	-	3866418	ENSGALT00000005099	protein_coding	NO
B Cell	chr28	+	3991120	ENSGALT00000097275	protein_coding	chr28	-	3991254	ENSGALT00000076102	protein_coding	NO
B Cell	chr28	+	3991436	ENSGALT00000005309	protein_coding	chr28	-	3991254	ENSGALT00000076102	protein_coding	NO
B Cell	chr28	+	3991833	ENSGALT00000096797	protein_coding	chr28	-	3991254	ENSGALT00000076102	protein_coding	NO
B Cell	chr28	+	4391142	ENSGALT00000070802	protein_coding	chr28	-	4391056	ENSGALT00000005994	protein_coding	NO
B Cell	chr28	+	4412467	ENSGALT00000006018	protein_coding	chr28	-	4412337	ENSGALT00000070751	protein_coding	NO
B Cell	chr30	+	392256	ENSGALT00000100379	protein_coding	chr30	-	392236	ENSGALT00000082311	protein_coding	NO
B Cell	chr30	+	273452	ENSGALT00000086875	protein_coding	chr30	-	272962	ENSGALT00000046404	protein_coding	NO
B Cell	chr30	+	424834	ENSGALT00000073056	protein_coding	chr30	-	424991	ENSGALT00000067189	protein_coding	NO
B Cell	chr30	+	1059949	ENSGALT00000056280	protein_coding	chr30	-	1059913	ENSGALT00000081607	protein_coding	NO
B Cell	chr30	+	1094275	ENSGALT00000073335	protein_coding	chr30	-	1094312	ENSGALT00000061946	protein_coding	NO
B Cell	chr30	+	1191403	ENSGALT00000097788	protein_coding	chr30	-	1191250	ENSGALT00000105600	protein_coding	NO
B Cell	chr32	+	67697	ENSGALT00000068703	protein_coding	chr32	-	66800	ENSGALT00000090630	protein_coding	NO
B Cell	chr32	+	146039	ENSGALT00000061712	protein_coding	chr32	-	145809	ENSGALT00000047202	protein_coding	NO
B Cell	chr32	+	195849	ENSGALT00000107583	protein_coding	chr32	-	195670	ENSGALT00000074379	protein_coding	NO
B Cell	chr32	+	195866	ENSGALT00000102037	protein_coding	chr32	-	195670	ENSGALT00000074379	protein_coding	NO
B Cell	chr32	+	247281	ENSGALT00000094365	protein_coding	chr32	-	246753	ENSGALT00000066625	protein_coding	NO
B Cell	chr32	+	271161	ENSGALT00000094281	protein_coding	chr32	-	270998	ENSGALT00000082861	protein_coding	NO
B Cell	chr33	+	5499568	ENSGALT00000074363	protein_coding	chr33	-	5499291	ENSGALT00000102060	protein_coding	NO
B Cell	chr33	+	5067639	ENSGALT00000046663	protein_coding	chr33	-	5068444	ENSGALT00000068087	protein_coding	NO
B Cell	chr33	+	5538237	ENSGALT00000087394	protein_coding	chr33	-	5538000	ENSGALT00000060248	protein_coding	NO
B Cell	chr33	+	6498649	ENSGALT00000108279	protein_coding	chr33	-	6498311	ENSGALT00000062215	protein_coding	NO
B Cell	chr33	+	6997853	ENSGALT00000063352	protein_coding	chr33	-	6997701	ENSGALT00000077118	protein_coding	NO
B Cell	chr33	+	7092008	ENSGALT00000077972	protein_coding	chr33	-	7091089	ENSGALT00000048105	protein_coding	NO
B Cell	chr33	+	7224088	ENSGALT00000052009	protein_coding	chr33	-	7224395	ENSGALT00000086793	protein_coding	NO
B Cell	chr33	+	7735363	ENSGALT00000073824	protein_coding	chr33	-	7735343	ENSGALT00000093204	protein_coding	NO
Bursa	chr1	+	28571392	ENSGALT00000015456	protein_coding	chr1	-	28571188	ENSGALT00000044409	protein_coding	NO
Bursa	chr1	+	29702685	ENSGALT00000073496	protein_coding	chr1	-	29702640	ENSGALT00000015532	protein_coding	NO
Bursa	chr1	+	33914415	ENSGALT00000016033	protein_coding	chr1	-	33913536	ENSGALT00000016025	protein_coding	NO
Bursa	chr1	+	45470195	ENSGALT00000018529	protein_coding	chr1	-	45469802	ENSGALT00000018508	protein_coding	NO
Bursa	chr1	+	50979470	ENSGALT00000108327	protein_coding	chr1	-	50979138	ENSGALT00000020063	protein_coding	NO
Bursa	chr1	+	50979470	ENSGALT00000108327	protein_coding	chr1	-	50978886	ENSGALT00000093539	protein_coding	NO
Bursa	chr1	+	50979694	ENSGALT00000020069	protein_coding	chr1	-	50979138	ENSGALT00000020063	protein_coding	NO
Bursa	chr1	+	50979694	ENSGALT00000020069	protein_coding	chr1	-	50978886	ENSGALT00000093539	protein_coding	NO
Bursa	chr1	+	55418025	ENSGALT00000020821	protein_coding	chr1	-	55417954	ENSGALT00000020817	protein_coding	NO
Bursa	chr1	+	72032826	ENSGALT00000051385	protein_coding	chr1	-	72032673	ENSGALT00000097804	protein_coding	NO
Bursa	chr1	+	72032826	ENSGALT00000051385	protein_coding	chr1	-	72032681	ENSGALT00000043173	protein_coding	NO
Bursa	chr1	+	90035288	ENSGALT00000036874	protein_coding	chr1	-	90034767	ENSGALT00000081476	protein_coding	NO
Bursa	chr1	+	108342782	ENSGALT00000103367	protein_coding	chr1	-	108342302	ENSGALT00000101896	protein_coding	NO
Bursa	chr1	+	119665839	ENSGALT00000064964	protein_coding	chr1	-	119666014	ENSGALT00000026357	protein_coding	NO
Bursa	chr1	+	133813721	ENSGALT00000063432	protein_coding	chr1	-	133813733	ENSGALT00000027060	protein_coding	NO
Bursa	chr1	+	140248815	ENSGALT00000100687	protein_coding	chr1	-	140249096	ENSGALT00000053661	protein_coding	NO
Bursa	chr1	+	140249470	ENSGALT00000027208	protein_coding	chr1	-	140249096	ENSGALT00000053661	protein_coding	NO
Bursa	chr1	+	168950858	ENSGALT00000071429	protein_coding	chr1	-	168950766	ENSGALT00000036491	protein_coding	NO
Bursa	chr1	+	181650845	ENSGALT00000080652	protein_coding	chr1	-	181650668	ENSGALT00000027713	protein_coding	NO
Bursa	chr1	+	194375024	ENSGALT00000057974	protein_coding	chr1	-	194374727	ENSGALT00000060312	protein_coding	NO
Bursa	chr1	+	387735	ENSGALT00000105424	protein_coding	chr1	-	387604	ENSGALT00000082348	protein_coding	NO
Bursa	chr1	+	943310	ENSGALT00000097594	protein_coding	chr1	-	943714	ENSGALT00000094054	protein_coding	NO
Bursa	chr1	+	1103222	ENSGALT00000050474	protein_coding	chr1	-	1102807	ENSGALT00000056542	protein_coding	NO
Bursa	chr1	+	1291723	ENSGALT00000097738	protein_coding	chr1	-	1291147	ENSGALT00000080406	protein_coding	NO
Bursa	chr1	+	1544376	ENSGALT00000093249	protein_coding	chr1	-	1544020	ENSGALT00000012992	protein_coding	NO
Bursa	chr1	+	1544394	ENSGALT00000013005	protein_coding	chr1	-	1544020	ENSGALT00000012992	protein_coding	NO
Bursa	chr1	+	1614550	ENSGALT00000085290	protein_coding	chr1	-	1614380	ENSGALT00000013152	protein_coding	NO
Bursa	chr1	+	4815822	ENSGALT00000059202	protein_coding	chr1	-	4815768	ENSGALT00000065471	protein_coding	NO
Bursa	chr1	+	4815836	ENSGALT00000085346	protein_coding	chr1	-	4815768	ENSGALT00000065471	protein_coding	NO
Bursa	chr1	+	12642780	ENSGALT00000013557	protein_coding	chr1	-	12642425	ENSGALT00000013567	protein_coding	NO
Bursa	chr1	+	13132813	ENSGALT00000087665	protein_coding	chr1	-	13132568	ENSGALT00000013428	protein_coding	NO
Bursa	chr1	+	14881060	ENSGALT00000039460	protein_coding	chr1	-	14881357	ENSGALT00000068162	protein_coding	NO
Bursa	chr1	+	15825373	ENSGALT00000021255	protein_coding	chr1	-	15825318	ENSGALT00000070013	protein_coding	NO
Bursa	chr1	+	19045086	ENSGALT00000013929	protein_coding	chr1	-	19044605	ENSGALT00000061619	protein_coding	NO
Bursa	chr1	+	19045086	ENSGALT00000013929	protein_coding	chr1	-	19044612	ENSGALT00000013914	protein_coding	NO
Bursa	chr1	+	19045086	ENSGALT00000013929	protein_coding	chr1	-	19044587	ENSGALT00000081928	protein_coding	NO
Bursa	chr1	+	30191198	ENSGALT00000015615	protein_coding	chr1	-	30190843	ENSGALT00000015605	protein_coding	NO
Bursa	chr1	+	31563283	ENSGALT00000015861	protein_coding	chr1	-	31563241	ENSGALT00000015853	protein_coding	NO
Bursa	chr1	+	33726766	ENSGALT00000015988	protein_coding	chr1	-	33726148	ENSGALT00000015981	protein_coding	NO
Bursa	chr1	+	38390485	ENSGALT00000061912	protein_coding	chr1	-	38391308	ENSGALT00000070654	protein_coding	NO
Bursa	chr1	+	46718129	ENSGALT00000038231	protein_coding	chr1	-	46717148	ENSGALT00000093522	protein_coding	NO
Bursa	chr1	+	46718129	ENSGALT00000038231	protein_coding	chr1	-	46717138	ENSGALT00000046169	protein_coding	NO
Bursa	chr1	+	48086503	ENSGALT00000102658	protein_coding	chr1	-	48086884	ENSGALT00000058977	protein_coding	NO
Bursa	chr1	+	48087184	ENSGALT00000073766	protein_coding	chr1	-	48086884	ENSGALT00000058977	protein_coding	NO
Bursa	chr1	+	48095103	ENSGALT00000070686	protein_coding	chr1	-	48096067	ENSGALT00000073535	protein_coding	NO
Bursa	chr1	+	48102059	ENSGALT00000105242	protein_coding	chr1	-	48101764	ENSGALT00000045162	protein_coding	NO
Bursa	chr1	+	48129285	ENSGALT00000081149	protein_coding	chr1	-	48130279	ENSGALT00000079743	protein_coding	NO
Bursa	chr1	+	48153913	ENSGALT00000043224	protein_coding	chr1	-	48153627	ENSGALT00000108326	protein_coding	NO
Bursa	chr1	+	48160178	ENSGALT00000042841	protein_coding	chr1	-	48159885	ENSGALT00000095522	protein_coding	NO
Bursa	chr1	+	48170394	ENSGALT00000092743	protein_coding	chr1	-	48170081	ENSGALT00000046827	protein_coding	NO
Bursa	chr1	+	48175635	ENSGALT00000049616	protein_coding	chr1	-	48175348	ENSGALT00000090832	protein_coding	NO
Bursa	chr1	+	49183469	ENSGALT00000019356	protein_coding	chr1	-	49183180	ENSGALT00000028601	protein_coding	NO
Bursa	chr1	+	49571825	ENSGALT00000091419	protein_coding	chr1	-	49571511	ENSGALT00000037980	protein_coding	NO
Bursa	chr1	+	49629137	ENSGALT00000019497	protein_coding	chr1	-	49628904	ENSGALT00000019494	protein_coding	NO
Bursa	chr1	+	49906354	ENSGALT00000019595	protein_coding	chr1	-	49906124	ENSGALT00000019589	protein_coding	NO
Bursa	chr1	+	51071011	ENSGALT00000020086	protein_coding	chr1	-	51070945	ENSGALT00000020084	protein_coding	NO
Bursa	chr1	+	51155528	ENSGALT00000098447	protein_coding	chr1	-	51155398	ENSGALT00000020279	protein_coding	NO
Bursa	chr1	+	51511485	ENSGALT00000020401	protein_coding	chr1	-	51511452	ENSGALT00000086116	protein_coding	NO
Bursa	chr1	+	54703830	ENSGALT00000068252	protein_coding	chr1	-	54704028	ENSGALT00000052099	protein_coding	NO
Bursa	chr1	+	56771258	ENSGALT00000020960	protein_coding	chr1	-	56771091	ENSGALT00000020957	protein_coding	NO
Bursa	chr1	+	61798693	ENSGALT00000021282	protein_coding	chr1	-	61799223	ENSGALT00000021281	protein_coding	NO
Bursa	chr1	+	61860008	ENSGALT00000094657	protein_coding	chr1	-	61860517	ENSGALT00000021284	protein_coding	NO
Bursa	chr1	+	61860030	ENSGALT00000093471	protein_coding	chr1	-	61860517	ENSGALT00000021284	protein_coding	NO
Bursa	chr1	+	65337340	ENSGALT00000060053	protein_coding	chr1	-	65337020	ENSGALT00000021517	protein_coding	NO
Bursa	chr1	+	68016635	ENSGALT00000044701	protein_coding	chr1	-	68015655	ENSGALT00000099270	protein_coding	NO
Bursa	chr1	+	68016635	ENSGALT00000044701	protein_coding	chr1	-	68015987	ENSGALT00000048877	protein_coding	NO
Bursa	chr1	+	73358185	ENSGALT00000027944	protein_coding	chr1	-	73358098	ENSGALT00000104609	protein_coding	NO
Bursa	chr1	+	75332031	ENSGALT00000021889	protein_coding	chr1	-	75331844	ENSGALT00000021891	protein_coding	NO
Bursa	chr1	+	77463746	ENSGALT00000023289	protein_coding	chr1	-	77464115	ENSGALT00000084532	protein_coding	NO
Bursa	chr1	+	77588151	ENSGALT00000042566	protein_coding	chr1	-	77587396	ENSGALT00000023314	protein_coding	NO
Bursa	chr1	+	78020565	ENSGALT00000023493	protein_coding	chr1	-	78020461	ENSGALT00000023492	protein_coding	NO
Bursa	chr1	+	79906678	ENSGALT00000094740	protein_coding	chr1	-	79906621	ENSGALT00000023879	protein_coding	NO
Bursa	chr1	+	79997431	ENSGALT00000060423	protein_coding	chr1	-	79997334	ENSGALT00000092406	protein_coding	NO
Bursa	chr1	+	80556279	ENSGALT00000024115	protein_coding	chr1	-	80556121	ENSGALT00000074438	protein_coding	NO
Bursa	chr1	+	83782814	ENSGALT00000094942	protein_coding	chr1	-	83782730	ENSGALT00000056440	protein_coding	NO
Bursa	chr1	+	84701317	ENSGALT00000024530	protein_coding	chr1	-	84700553	ENSGALT00000090956	protein_coding	NO
Bursa	chr1	+	84701317	ENSGALT00000024530	protein_coding	chr1	-	84701091	ENSGALT00000102535	protein_coding	NO
Bursa	chr1	+	84810189	ENSGALT00000024577	protein_coding	chr1	-	84810188	ENSGALT00000024570	protein_coding	NO
Bursa	chr1	+	84810189	ENSGALT00000024577	protein_coding	chr1	-	84810151	ENSGALT00000107061	protein_coding	NO
Bursa	chr1	+	85946021	ENSGALT00000024650	protein_coding	chr1	-	85945887	ENSGALT00000100753	protein_coding	NO
Bursa	chr1	+	86009786	ENSGALT00000024674	protein_coding	chr1	-	86010298	ENSGALT00000024670	protein_coding	NO
Bursa	chr1	+	86432579	ENSGALT00000024742	protein_coding	chr1	-	86432550	ENSGALT00000024741	protein_coding	NO
Bursa	chr1	+	86473465	ENSGALT00000100800	protein_coding	chr1	-	86473519	ENSGALT00000083617	protein_coding	NO
Bursa	chr1	+	88748621	ENSGALT00000094520	protein_coding	chr1	-	88749184	ENSGALT00000024781	protein_coding	NO
Bursa	chr1	+	91130618	ENSGALT00000024861	protein_coding	chr1	-	91130574	ENSGALT00000098899	protein_coding	NO
Bursa	chr1	+	103860752	ENSGALT00000025419	protein_coding	chr1	-	103860617	ENSGALT00000063486	protein_coding	NO
Bursa	chr1	+	107912723	ENSGALT00000084718	protein_coding	chr1	-	107912598	ENSGALT00000025813	protein_coding	NO
Bursa	chr1	+	109333196	ENSGALT00000025891	protein_coding	chr1	-	109332889	ENSGALT00000086149	protein_coding	NO
Bursa	chr1	+	109333196	ENSGALT00000025891	protein_coding	chr1	-	109332518	ENSGALT00000025884	protein_coding	NO
Bursa	chr1	+	110902175	ENSGALT00000036704	protein_coding	chr1	-	110902129	ENSGALT00000026088	protein_coding	NO
Bursa	chr1	+	110902259	ENSGALT00000068933	protein_coding	chr1	-	110902129	ENSGALT00000026088	protein_coding	NO
Bursa	chr1	+	111336045	ENSGALT00000049988	protein_coding	chr1	-	111335748	ENSGALT00000026119	protein_coding	NO
Bursa	chr1	+	122843956	ENSGALT00000026701	protein_coding	chr1	-	122843890	ENSGALT00000026700	protein_coding	NO
Bursa	chr1	+	123713869	ENSGALT00000026744	protein_coding	chr1	-	123713845	ENSGALT00000026743	protein_coding	NO
Bursa	chr1	+	124337729	ENSGALT00000107403	protein_coding	chr1	-	124337655	ENSGALT00000026755	protein_coding	NO
Bursa	chr1	+	124337988	ENSGALT00000026761	protein_coding	chr1	-	124337655	ENSGALT00000026755	protein_coding	NO
Bursa	chr1	+	127826527	ENSGALT00000071516	protein_coding	chr1	-	127825809	ENSGALT00000049303	protein_coding	NO
Bursa	chr1	+	131359737	ENSGALT00000026979	protein_coding	chr1	-	131358862	ENSGALT00000026974	protein_coding	NO
Bursa	chr1	+	131359737	ENSGALT00000026979	protein_coding	chr1	-	131358996	ENSGALT00000092560	protein_coding	NO
Bursa	chr1	+	133610585	ENSGALT00000064380	protein_coding	chr1	-	133610582	ENSGALT00000064247	protein_coding	NO
Bursa	chr1	+	133610585	ENSGALT00000064380	protein_coding	chr1	-	133610545	ENSGALT00000097638	protein_coding	NO
Bursa	chr1	+	133860170	ENSGALT00000027066	protein_coding	chr1	-	133859438	ENSGALT00000082985	protein_coding	NO
Bursa	chr1	+	138198426	ENSGALT00000045618	protein_coding	chr1	-	138198192	ENSGALT00000027142	protein_coding	NO
Bursa	chr1	+	138304484	ENSGALT00000099286	protein_coding	chr1	-	138303644	ENSGALT00000027148	protein_coding	NO
Bursa	chr1	+	138728118	ENSGALT00000043785	protein_coding	chr1	-	138727777	ENSGALT00000102100	protein_coding	NO
Bursa	chr1	+	138890967	ENSGALT00000027172	protein_coding	chr1	-	138890288	ENSGALT00000027171	protein_coding	NO
[truncated: 9,347 more rows]

## Sheet: Mono-Expressed H2H Pairs
Supplemental Table 4: H2H Co-Expressed Transcript Pairs
[truncated: 10,627 more rows]
