# Supplementary material for: Transcriptomes of an Array of Chicken Ovary, Intestinal, and Immune Cells and Tissues
Source: Front Genet. 2021 Jun 30;12:664424. doi: 10.3389/fgene.2021.664424 (PMC8278112; doi:10.3389/fgene.2021.664424)
Supplement: Supplementary Table 6 — Intestinal differential expression and GO results (related to Figure 6). (Sheet 1) Jejunum vs. ileum DESeq2 results. (Sheet 2) Jejunum vs. proximal cecum DESeq2 results. (Sheet 3) Ileum vs. proximal cecum DESeq2 results. (Sheet 4) Jejunum vs. ileum WebGestalt (GO) results. (Sheet 5) Jejunum vs. proximal cecum WebGestalt (GO) results. (Sheet 6) Ileum vs. proximal cecum WebGestalt (GO) results [file Table_6.XLSX]

## Sheet: Jejunum vs Ileum - DESeq2 Resul
Supplemental Table 6
Sheet 1: Jejunum vs Ileum DESeq2 Results
gene_name	baseMean	log2FoldChange	lfcSE	stat	pvalue	padj
ENSGALG00000036956	1.04501e+06	-12.5105	0.287392	-43.5313	0	0
ENSGALG00000043598	1.39614e+06	-8.81772	0.278656	-31.6438	9.23e-220	7.02e-216
ENSGALG00000037838_ND6	11185.2	-8.16457	0.357094	-22.8639	1.06e-115	5.39e-112
ENSGALG00000005327_RBP2	25340.6	-8.89411	0.392148	-22.6805	6.98e-114	2.66e-110
ENSGALG00000043768_MT-ND2	17957.4	-6.16079	0.28374	-21.7128	1.55e-104	4.73e-101
ENSGALG00000012260_LCT	6792.05	-10.2298	0.486582	-21.0238	3.98e-98	1.01e-94
ENSGALG00000036229_ND4	19897.8	-6.23789	0.300284	-20.7733	7.55e-96	1.64e-92
ENSGALG00000042750_ND1	15488.2	-5.93986	0.295572	-20.0961	7.98e-90	1.52e-86
ENSGALG00000007109_APOA4	18811.3	-6.68658	0.340511	-19.6369	7.48e-86	1.26e-82
ENSGALG00000021931_SNORA73	2521.19	6.48327	0.337666	19.2002	3.69e-82	5.61e-79
ENSGALG00000053144_U3	2070.01	6.1438	0.322456	19.0531	6.19e-81	8.56e-78
ENSGALG00000015730_TMPRSS15	5098.96	-8.3882	0.442735	-18.9463	4.74e-80	6.01e-77
ENSGALG00000009639_DDX60	6538.59	-6.32292	0.34748	-18.1965	5.5e-74	6.44e-71
ENSGALG00000005408_BCO1	5302.48	-6.01519	0.341946	-17.591	2.88e-69	3.14e-66
ENSGALG00000029500_ND5	25574.4	-5.4059	0.310759	-17.3958	8.88e-68	9.01e-65
ENSGALG00000027520	1535.65	-5.98205	0.353772	-16.9093	3.84e-64	3.65e-61
ENSGALG00000041091_ATP6	17506.3	-4.65668	0.278463	-16.7228	8.94e-63	8e-60
ENSGALG00000013304_SLC5A12	1588.18	7.226	0.43269	16.7002	1.31e-62	1.11e-59
ENSGALG00000002581	3608.91	-5.45646	0.327975	-16.6368	3.77e-62	3.02e-59
ENSGALG00000008704_CUBN	3672.05	-6.06975	0.365426	-16.6101	5.89e-62	4.48e-59
ENSGALG00000007959_SLC26A3	2935.66	7.52252	0.463594	16.2265	3.27e-59	2.37e-56
ENSGALG00000046226_SCARB1	1798.65	-5.5621	0.356905	-15.5842	9.32e-55	6.45e-52
ENSGALG00000032079_CYTB	21519.3	-4.54642	0.293349	-15.4983	3.56e-54	2.36e-51
ENSGALG00000043329	946.451	-5.4833	0.356398	-15.3853	2.05e-53	1.3e-50
ENSGALG00000001299_GIP	403.314	-6.15312	0.405264	-15.183	4.58e-52	2.79e-49
ENSGALG00000003751	1407.02	-10.4717	0.695089	-15.0653	2.74e-51	1.6e-48
ENSGALG00000046795_Metazoa_SRP	257694	5.26274	0.355777	14.7923	1.64e-49	9.26e-47
ENSGALG00000032142_MT-CO1	112181	-4.21989	0.292508	-14.4266	3.52e-47	1.91e-44
ENSGALG00000045581	588.668	-4.78127	0.337404	-14.1708	1.39e-45	7.29e-43
ENSGALG00000012392_IYD	358.618	-7.13445	0.504058	-14.154	1.76e-45	8.94e-43
ENSGALG00000025695_SCARNA13	1644.31	5.19626	0.367482	14.1402	2.15e-45	1.05e-42
ENSGALG00000010891_ABCB11	351.416	-7.09899	0.519338	-13.6693	1.55e-42	7.36e-40
ENSGALG00000032456_COII	19794	-3.78423	0.27856	-13.585	4.92e-42	2.27e-39
ENSGALG00000045747_REEP6	339.75	-6.65263	0.48999	-13.5771	5.48e-42	2.45e-39
ENSGALG00000049065_ZFPM1	804.769	-5.57616	0.411235	-13.5595	6.96e-42	3.03e-39
ENSGALG00000016662_GATA4	989.82	-10.6158	0.784919	-13.5247	1.12e-41	4.72e-39
ENSGALG00000013916_HYPK	651.783	-4.51408	0.335569	-13.452	3e-41	1.23e-38
ENSGALG00000028451_MT4	686.884	6.20903	0.465943	13.3257	1.64e-40	6.57e-38
ENSGALG00000052199	270.708	-6.64474	0.50091	-13.2653	3.68e-40	1.43e-37
ENSGALG00000002960_HMGCS2	577.316	-5.06946	0.38425	-13.1932	9.61e-40	3.66e-37
ENSGALG00000041878_AQP5	1466.87	-5.35875	0.410173	-13.0646	5.24e-39	1.95e-36
ENSGALG00000025650_RNaseP_nuc	181611	4.49199	0.344717	13.031	8.16e-39	2.96e-36
ENSGALG00000016858_SLC10A2	4076.59	11.753	0.904493	12.994	1.32e-38	4.68e-36
ENSGALG00000015053_GLDC	336.839	-4.96158	0.382806	-12.9611	2.03e-38	7.03e-36
ENSGALG00000004186_NSRP1	531.617	-4.50535	0.348155	-12.9406	2.65e-38	8.98e-36
ENSGALG00000002595_GPX4	2746.76	-3.71955	0.296829	-12.5309	5.06e-36	1.67e-33
ENSGALG00000009511	28401.8	-3.62471	0.291719	-12.4254	1.9e-35	6.16e-33
ENSGALG00000025557_RNase_MRP	158293	4.43223	0.356967	12.4164	2.13e-35	6.75e-33
ENSGALG00000011633_SLC5A8	485.912	-4.9643	0.401143	-12.3754	3.55e-35	1.1e-32
ENSGALG00000004170_ADA	11065.2	-3.74149	0.304567	-12.2846	1.1e-34	3.33e-32
ENSGALG00000012613_FBP1	2025.66	-3.61919	0.29543	-12.2506	1.67e-34	4.98e-32
ENSGALG00000007311_CLDN2	402.068	-4.43256	0.361914	-12.2475	1.73e-34	5.07e-32
ENSGALG00000017819_SNORA71	262.79	-6.71364	0.553758	-12.1238	7.9e-34	2.27e-31
ENSGALG00000028214_OTOP3	362.747	-5.97097	0.494649	-12.0711	1.5e-33	4.23e-31
ENSGALG00000008149_EWSR1	590.461	-4.05828	0.336346	-12.0658	1.6e-33	4.43e-31
ENSGALG00000049582	500.608	-4.48684	0.374251	-11.9889	4.06e-33	1.1e-30
ENSGALG00000035334_COX3	48846.6	-3.3945	0.283473	-11.9747	4.82e-33	1.29e-30
ENSGALG00000051169	882.688	-3.82813	0.322466	-11.8714	1.67e-32	4.37e-30
ENSGALG00000041030_PCBP2	1109.79	-4.33459	0.365351	-11.8642	1.82e-32	4.69e-30
ENSGALG00000046731	608.007	-5.84974	0.495182	-11.8133	3.33e-32	8.45e-30
ENSGALG00000043754_GLUL	5553.67	-3.94967	0.335268	-11.7806	4.91e-32	1.23e-29
ENSGALG00000039536_C2H8ORF22	454.319	-4.32022	0.367524	-11.7549	6.66e-32	1.63e-29
ENSGALG00000016055_KCNJ15	530.21	5.12818	0.436437	11.7501	7.05e-32	1.7e-29
ENSGALG00000049270	284.204	-4.45228	0.380396	-11.7043	1.21e-31	2.88e-29
ENSGALG00000029644	327.429	6.35857	0.548412	11.5945	4.39e-31	1.03e-28
ENSGALG00000007361_SST	187.373	-5.10948	0.443402	-11.5234	1.01e-30	2.32e-28
ENSGALG00000007114_APOA1	149164	-4.39955	0.386162	-11.393	4.53e-30	1.03e-27
ENSGALG00000048200_MRPL33	763.621	-3.67204	0.324929	-11.3011	1.3e-29	2.9e-27
ENSGALG00000047241_Metazoa_SRP	142977	12.362	1.11256	11.1113	1.11e-28	2.44e-26
ENSGALG00000032836	1502.74	-3.52653	0.317936	-11.092	1.37e-28	2.98e-26
ENSGALG00000000377_HNRNPM	2068.74	-3.35257	0.302685	-11.0761	1.64e-28	3.51e-26
ENSGALG00000050459_DUSP23	311.703	-3.90691	0.355192	-10.9994	3.85e-28	8.13e-26
ENSGALG00000047103_UTP3	477.098	-4.1002	0.377697	-10.8558	1.87e-27	3.9e-25
ENSGALG00000049148	166.831	-4.92215	0.455836	-10.7981	3.52e-27	7.23e-25
ENSGALG00000003878_PIN4	1560.9	-3.83689	0.356371	-10.7665	4.95e-27	1e-24
ENSGALG00000039974_AKAP8L	640.331	-3.35166	0.312193	-10.7358	6.91e-27	1.38e-24
ENSGALG00000005580_TMEM56	3288.57	-3.26114	0.305182	-10.6859	1.19e-26	2.34e-24
ENSGALG00000010209_PGRMC2	498.112	-3.8098	0.356682	-10.6812	1.25e-26	2.43e-24
ENSGALG00000010554	2243.49	-3.16133	0.296021	-10.6794	1.27e-26	2.45e-24
ENSGALG00000019175	270.601	-8.74302	0.824606	-10.6027	2.9e-26	5.51e-24
ENSGALG00000051290	369.615	-5.68153	0.538798	-10.5448	5.37e-26	1.01e-23
ENSGALG00000038396	1010.98	-3.8483	0.366784	-10.492	9.4e-26	1.74e-23
ENSGALG00000006728_SLC5A1	17710.1	-3.00494	0.287033	-10.469	1.2e-25	2.2e-23
ENSGALG00000006843_NCBP2	806.344	-3.39112	0.324255	-10.4582	1.34e-25	2.44e-23
ENSGALG00000011356	301.88	-4.1348	0.397674	-10.3975	2.55e-25	4.56e-23
ENSGALG00000001948	1092.42	-3.2188	0.309971	-10.3842	2.93e-25	5.18e-23
ENSGALG00000016415_MAP7D2	899.363	-3.3328	0.321652	-10.3615	3.71e-25	6.49e-23
ENSGALG00000004372_MICU1	628.643	-3.56295	0.343947	-10.359	3.81e-25	6.59e-23
ENSGALG00000054991	1755.12	-3.23774	0.314286	-10.3019	6.91e-25	1.18e-22
ENSGALG00000047273_DRAP1	126.156	-5.69404	0.553303	-10.291	7.74e-25	1.31e-22
ENSGALG00000013191_NDUFS6	515.118	-3.98868	0.387676	-10.2887	7.93e-25	1.33e-22
ENSGALG00000042478_ND4L	702.83	-3.66019	0.356396	-10.27	9.62e-25	1.59e-22
ENSGALG00000015616_ACOT12	318.68	-4.80691	0.469426	-10.24	1.31e-24	2.15e-22
ENSGALG00000029624_DHRS4	1367.98	-3.38945	0.331328	-10.2299	1.46e-24	2.36e-22
ENSGALG00000034358	1352.27	-3.49465	0.342365	-10.2074	1.84e-24	2.94e-22
ENSGALG00000030034_G6PC	117.271	-6.19036	0.611462	-10.1239	4.33e-24	6.86e-22
ENSGALG00000008352_CKMT1B	3549.44	-3.14472	0.310987	-10.112	4.89e-24	7.66e-22
ENSGALG00000009306_SLC2A2	829.862	-11.3517	1.12342	-10.1046	5.27e-24	8.18e-22
ENSGALG00000037805_RPS19	6567.75	-3.3129	0.330658	-10.0191	1.26e-23	1.93e-21
ENSGALG00000048365_GPATCH4	213.876	-3.80522	0.380624	-9.99732	1.57e-23	2.38e-21
ENSGALG00000034725	1529.04	-3.71693	0.372245	-9.98519	1.77e-23	2.67e-21
ENSGALG00000032499_ANAPC15	233.851	-3.94608	0.395604	-9.97482	1.96e-23	2.93e-21
ENSGALG00000047052	192.071	-4.52186	0.45364	-9.96795	2.11e-23	3.11e-21
ENSGALG00000054374	162.071	-4.26595	0.428237	-9.96165	2.24e-23	3.28e-21
ENSGALG00000002832_IFI35	1230.59	-3.25618	0.327262	-9.94978	2.53e-23	3.66e-21
ENSGALG00000001949_MDH2	2952.36	-2.96008	0.297718	-9.94256	2.72e-23	3.9e-21
ENSGALG00000031872_AGMAT	481.032	-3.25854	0.328148	-9.93007	3.08e-23	4.38e-21
ENSGALG00000012466_FKBP3	1525.84	-3.01393	0.303782	-9.92136	3.36e-23	4.74e-21
ENSGALG00000008618_UPF3B	776.475	-3.20069	0.323166	-9.90417	3.99e-23	5.57e-21
ENSGALG00000009839_PPIG	1373.55	-3.42099	0.346402	-9.87577	5.3e-23	7.34e-21
ENSGALG00000009262_FGB	173.539	-5.28686	0.540323	-9.78464	1.31e-22	1.8e-20
ENSGALG00000049711	479.013	-4.701	0.481591	-9.7614	1.65e-22	2.24e-20
ENSGALG00000000745_SLC26A9	1236.87	-14.3783	1.47845	-9.72521	2.35e-22	3.17e-20
ENSGALG00000052930	474.519	-3.42893	0.352765	-9.72015	2.47e-22	3.3e-20
ENSGALG00000037587_ENPP3	1910.94	-3.43986	0.355641	-9.67229	3.95e-22	5.23e-20
ENSGALG00000054856	306.041	-3.80908	0.39457	-9.65376	4.74e-22	6.22e-20
ENSGALG00000037854_TKFC	1806	-3.61525	0.374907	-9.64304	5.26e-22	6.84e-20
ENSGALG00000037289_ATL2	3099.13	-2.7263	0.285268	-9.55697	1.21e-21	1.56e-19
ENSGALG00000011036_HNRNPA2B1	7437.38	-3.04162	0.31944	-9.52175	1.7e-21	2.18e-19
ENSGALG00000001325_CYP1A1	135.75	-6.27381	0.659668	-9.51055	1.9e-21	2.41e-19
ENSGALG00000047569	145.287	-4.6445	0.488928	-9.49935	2.11e-21	2.66e-19
ENSGALG00000001445_FABP6	21456.2	10.7779	1.13602	9.48743	2.37e-21	2.95e-19
ENSGALG00000049538_RPS28	2653.59	3.04079	0.321824	9.4486	3.43e-21	4.25e-19
ENSGALG00000017930_7SK	154.191	5.31305	0.563273	9.43246	4.01e-21	4.92e-19
ENSGALG00000048273	326.915	-3.87958	0.41169	-9.42354	4.36e-21	5.31e-19
ENSGALG00000000542_ZNF593	1262.67	3.18869	0.338841	9.41059	4.93e-21	5.91e-19
ENSGALG00000003647_SLC13A2	890.608	4.04041	0.429345	9.41063	4.93e-21	5.91e-19
ENSGALG00000009807_FLVCR1	612.595	-3.13704	0.334232	-9.38581	6.24e-21	7.39e-19
ENSGALG00000016837	141.566	-4.18747	0.446168	-9.38541	6.27e-21	7.39e-19
ENSGALG00000013708_CYB5A	5383.94	-2.63617	0.281034	-9.38026	6.58e-21	7.7e-19
ENSGALG00000007596	229.746	4.10378	0.440292	9.32059	1.16e-20	1.34e-18
ENSGALG00000006341_SLC25A48	363.782	5.58469	0.601613	9.28286	1.65e-20	1.9e-18
ENSGALG00000042554_ABCD2	1201.61	-2.82805	0.306235	-9.2349	2.59e-20	2.96e-18
ENSGALG00000005360_CA4	1394.71	3.29923	0.357607	9.22584	2.81e-20	3.2e-18
ENSGALG00000046580_MGARP	93.0133	-4.48683	0.491858	-9.12219	7.36e-20	8.3e-18
ENSGALG00000005268_SEC22C	301.471	-3.20821	0.353515	-9.07518	1.13e-19	1.27e-17
ENSGALG00000023521_ADRA2A	281.789	-3.6606	0.403912	-9.06286	1.27e-19	1.41e-17
ENSGALG00000000374_RNPEP	1487.1	-2.92545	0.322983	-9.05759	1.33e-19	1.47e-17
ENSGALG00000053451	596.345	-3.67472	0.406739	-9.03459	1.65e-19	1.8e-17
ENSGALG00000003972_FAXDC2	399.377	-3.86705	0.429012	-9.01385	1.99e-19	2.16e-17
ENSGALG00000001153_AUTS2	331.808	-3.59858	0.399998	-8.9965	2.33e-19	2.51e-17
ENSGALG00000048788	1970.24	2.71701	0.30286	8.97118	2.93e-19	3.14e-17
ENSGALG00000024391_CACTIN	1010.01	-3.06526	0.341771	-8.96877	3e-19	3.19e-17
ENSGALG00000031824_HOOK2	544.241	-3.39304	0.379774	-8.93437	4.1e-19	4.33e-17
ENSGALG00000011798_HEBP1	2059.32	-2.61191	0.293008	-8.91412	4.92e-19	5.16e-17
ENSGALG00000037595_USF1	282.753	-3.43901	0.386801	-8.89091	6.06e-19	6.32e-17
ENSGALG00000031813_CASC3	755.77	-3.11209	0.350502	-8.87897	6.75e-19	6.99e-17
ENSGALG00000041926_HEXIM1	1772.83	-2.95259	0.334589	-8.82454	1.1e-18	1.13e-16
ENSGALG00000010427_TM4SF4	8832.34	-3.40535	0.386254	-8.81635	1.18e-18	1.21e-16
ENSGALG00000047486	718.265	-2.7201	0.308735	-8.81046	1.25e-18	1.26e-16
ENSGALG00000050630	116.276	-4.35843	0.495064	-8.80377	1.32e-18	1.33e-16
ENSGALG00000031737	7046.41	-2.8294	0.321419	-8.80283	1.33e-18	1.34e-16
ENSGALG00000005541_GJB1	364.568	-3.72884	0.423849	-8.79757	1.4e-18	1.39e-16
ENSGALG00000052829_MAMDC4	1171.68	-2.68081	0.305012	-8.78918	1.51e-18	1.49e-16
ENSGALG00000030028_MRPS14	172.745	-3.44737	0.392546	-8.78208	1.6e-18	1.58e-16
ENSGALG00000029015_TM6SF2	129.141	-4.46303	0.509469	-8.76017	1.95e-18	1.89e-16
ENSGALG00000045246_GOLIM4	1327.73	-2.62381	0.299523	-8.75997	1.95e-18	1.89e-16
ENSGALG00000038413_SURF6	290.1	-3.60408	0.412182	-8.74392	2.25e-18	2.15e-16
ENSGALG00000051260	2303.38	-2.80903	0.321242	-8.74429	2.24e-18	2.15e-16
ENSGALG00000010331_MME	10240.2	-2.73622	0.313028	-8.74113	2.31e-18	2.2e-16
ENSGALG00000003947_HNRNPH3	2394.94	-2.7551	0.315828	-8.72344	2.7e-18	2.55e-16
ENSGALG00000053867	248.878	-3.12853	0.358885	-8.71734	2.85e-18	2.68e-16
ENSGALG00000019622_TRIM71	192.544	-3.55416	0.408327	-8.7042	3.2e-18	2.99e-16
ENSGALG00000047453	79.5505	-5.79273	0.665602	-8.70299	3.23e-18	3e-16
ENSGALG00000002095_CHMP4B	2633	-2.63424	0.30345	-8.68097	3.92e-18	3.62e-16
ENSGALG00000016558_VEGFD	330.416	3.16387	0.365888	8.6471	5.28e-18	4.84e-16
ENSGALG00000002053_POR	4131.61	-2.57561	0.300103	-8.58241	9.29e-18	8.47e-16
ENSGALG00000030683_SNORD22	105.044	-5.56336	0.648719	-8.57592	9.83e-18	8.88e-16
ENSGALG00000032465_ATP8	186.532	-6.92658	0.807707	-8.57561	9.86e-18	8.88e-16
ENSGALG00000032847_HDGF	1586.9	-2.53806	0.296056	-8.57292	1.01e-17	9.03e-16
ENSGALG00000016791_SLC9A2	3468.23	-2.46107	0.287591	-8.55753	1.15e-17	1.03e-15
ENSGALG00000016491_APOB	109708	-2.55395	0.299038	-8.54055	1.34e-17	1.18e-15
ENSGALG00000025653_SCARNA10	8381.38	2.75935	0.324264	8.50957	1.75e-17	1.54e-15
ENSGALG00000020164_GAR1	84.0805	-4.99296	0.587049	-8.50519	1.81e-17	1.59e-15
ENSGALG00000034671_WDR74	165.739	-3.46865	0.40853	-8.49056	2.06e-17	1.79e-15
ENSGALG00000034960_MLXIPL	534.284	-3.03361	0.357591	-8.48348	2.19e-17	1.89e-15
ENSGALG00000039738_SLC9A3	1255.92	-3.05573	0.360737	-8.4708	2.44e-17	2.1e-15
ENSGALG00000051266	1031.02	-3.17207	0.374913	-8.46082	2.66e-17	2.27e-15
ENSGALG00000000137_SNRPE	254.423	-3.10242	0.367201	-8.44884	2.94e-17	2.5e-15
ENSGALG00000049505	420.577	-3.46159	0.409832	-8.44637	3.01e-17	2.54e-15
ENSGALG00000010820_CHGA	8569.96	-2.98678	0.355473	-8.40228	4.38e-17	3.68e-15
ENSGALG00000033170_GMDS	668.62	-2.55591	0.305514	-8.36591	5.97e-17	4.99e-15
ENSGALG00000027416_ROMO1	376.008	-2.76831	0.331038	-8.36253	6.14e-17	5.11e-15
ENSGALG00000011455_CL2	430.03	-3.19351	0.383204	-8.3337	7.84e-17	6.48e-15
ENSGALG00000008722_MCOLN2	292.551	3.07151	0.369357	8.31584	9.11e-17	7.49e-15
ENSGALG00000048565_PRKCSH	358.823	-3.0627	0.368373	-8.31414	9.24e-17	7.56e-15
ENSGALG00000000329_AHCYL1	1806.63	-2.51378	0.302413	-8.31242	9.38e-17	7.63e-15
ENSGALG00000046992_MCRIP2	510.669	-2.74477	0.330511	-8.30462	1e-16	8.11e-15
ENSGALG00000021158_SLC7A9	5617.61	2.76293	0.332846	8.30093	1.03e-16	8.32e-15
ENSGALG00000033647	205.912	-3.06109	0.370009	-8.27303	1.31e-16	1.05e-14
ENSGALG00000013297_BBOX1	868.349	-2.51787	0.305355	-8.2457	1.64e-16	1.31e-14
ENSGALG00000047952	158.843	-3.97883	0.484048	-8.2199	2.04e-16	1.61e-14
ENSGALG00000031341	16359.1	-2.7741	0.337551	-8.21832	2.06e-16	1.63e-14
ENSGALG00000013548_GZMA	1295.97	-2.89745	0.352645	-8.21633	2.1e-16	1.65e-14
ENSGALG00000008554_IL17REL	125.826	5.27293	0.642749	8.20372	2.33e-16	1.82e-14
ENSGALG00000003670_MAFB	1992.46	-2.99153	0.365001	-8.19594	2.49e-16	1.93e-14
ENSGALG00000014372_SLC34A2	1602.38	-2.40506	0.294362	-8.17041	3.07e-16	2.37e-14
ENSGALG00000002802_PACSIN1	369.863	-3.02097	0.371059	-8.14149	3.9e-16	3e-14
ENSGALG00000008840_ACSL5	5908.01	-2.66636	0.328073	-8.12734	4.39e-16	3.36e-14
ENSGALG00000014176_PLA2G2E	1894.63	2.45255	0.30252	8.10705	5.19e-16	3.95e-14
ENSGALG00000044436	219.749	-3.32357	0.41039	-8.09856	5.56e-16	4.21e-14
ENSGALG00000030351_ILF3	1228.27	-2.58805	0.320366	-8.07844	6.56e-16	4.94e-14
ENSGALG00000002445_KIAA0319L	3628.49	-2.54425	0.315547	-8.06299	7.44e-16	5.58e-14
ENSGALG00000041114_GOLGA4	4031.75	-2.4636	0.306602	-8.03519	9.34e-16	6.97e-14
ENSGALG00000035086	12599.1	-2.33555	0.291443	-8.01375	1.11e-15	8.26e-14
ENSGALG00000004373_KCNJ16	1357.64	2.5529	0.319193	7.99798	1.26e-15	9.34e-14
ENSGALG00000013637_TDP2	796.411	-2.4867	0.31106	-7.99427	1.3e-15	9.58e-14
ENSGALG00000028409_SNRPGP15	105.518	-4.12665	0.516398	-7.99123	1.34e-15	9.73e-14
ENSGALG00000041533_SLC11A2	610.077	-2.92474	0.365984	-7.99143	1.33e-15	9.73e-14
ENSGALG00000001542_MRPL20	300.791	-2.71984	0.340627	-7.98481	1.41e-15	1.02e-13
ENSGALG00000011184_HNRNPD	746.518	-2.5933	0.324998	-7.97943	1.47e-15	1.06e-13
ENSGALG00000007237_ALYREF	654.185	-2.60081	0.326236	-7.97218	1.56e-15	1.12e-13
ENSGALG00000040371	691.581	2.90562	0.364647	7.96831	1.61e-15	1.15e-13
ENSGALG00000014995_PGM5	2255.07	2.58955	0.325336	7.95962	1.73e-15	1.23e-13
ENSGALG00000043885_CFAP45	67.0828	-4.98265	0.626063	-7.95871	1.74e-15	1.23e-13
ENSGALG00000001054_C20H20ORF24	2110.19	-2.46135	0.309625	-7.94947	1.87e-15	1.32e-13
ENSGALG00000008675_SLC25A5	679.476	-2.6827	0.337902	-7.93929	2.03e-15	1.43e-13
ENSGALG00000007814	4765.58	-3.1538	0.3974	-7.93608	2.09e-15	1.45e-13
ENSGALG00000030002_KRT18	760.999	-2.5373	0.3197	-7.93652	2.08e-15	1.45e-13
ENSGALG00000005338_RPS21	358.355	3.36977	0.425336	7.92259	2.33e-15	1.61e-13
ENSGALG00000049326	834.036	-3.39787	0.429957	-7.90281	2.73e-15	1.88e-13
ENSGALG00000012137_KTN1	5474.95	-2.23353	0.282807	-7.89769	2.84e-15	1.95e-13
ENSGALG00000000919_PIGR	21134.4	-2.23573	0.283454	-7.88744	3.08e-15	2.1e-13
ENSGALG00000012200_GCH1	383.492	-2.83803	0.360227	-7.87846	3.31e-15	2.25e-13
ENSGALG00000031663_SEC11C	328.643	-2.79607	0.355098	-7.87408	3.43e-15	2.32e-13
ENSGALG00000007386_LUC7L3	1936.09	-2.3701	0.301147	-7.87025	3.54e-15	2.38e-13
ENSGALG00000018534	217.574	-3.8648	0.491206	-7.86799	3.6e-15	2.42e-13
ENSGALG00000036728_PRDM16	128.975	-4.01899	0.512947	-7.83511	4.68e-15	3.13e-13
ENSGALG00000028295_MFAP1	588.616	-2.43548	0.311804	-7.81093	5.68e-15	3.77e-13
ENSGALG00000015544_ALDOB	30999.7	-2.38685	0.30625	-7.79381	6.5e-15	4.3e-13
ENSGALG00000004162_SLC16A6	174.082	-2.96549	0.380883	-7.78584	6.93e-15	4.54e-13
ENSGALG00000011717	512.344	-2.72714	0.350245	-7.78637	6.9e-15	4.54e-13
ENSGALG00000054889	251.261	-2.85962	0.367407	-7.78327	7.07e-15	4.62e-13
ENSGALG00000021039_HKDC1	4400.27	-2.49132	0.320719	-7.76791	7.98e-15	5.19e-13
ENSGALG00000003517_ZBTB8OS	697.623	-2.41674	0.311794	-7.75108	9.11e-15	5.9e-13
ENSGALG00000013771_KIAA1211	1802.55	-2.25248	0.290923	-7.74252	9.75e-15	6.29e-13
ENSGALG00000014616_MT3	103.519	4.86677	0.62969	7.72884	1.09e-14	6.97e-13
ENSGALG00000001972	1110.28	-2.31842	0.300283	-7.72077	1.16e-14	7.39e-13
ENSGALG00000048013_HTD2	151.624	-3.05275	0.395842	-7.71205	1.24e-14	7.88e-13
ENSGALG00000011331_CTH	420.851	3.0058	0.39015	7.7042	1.32e-14	8.35e-13
ENSGALG00000001258_NUMA1	2953.33	-2.67481	0.347479	-7.69775	1.38e-14	8.74e-13
ENSGALG00000046712_LMNA	722.504	-2.39043	0.310718	-7.69324	1.43e-14	9.02e-13
ENSGALG00000008135_SATB2	250.917	4.01214	0.521839	7.68846	1.49e-14	9.29e-13
ENSGALG00000034675_XKR9	132.169	-3.51948	0.457738	-7.68886	1.48e-14	9.29e-13
ENSGALG00000053903	66.9171	-5.38147	0.700025	-7.68753	1.5e-14	9.32e-13
ENSGALG00000050897_TNIK	893.084	-2.36167	0.307703	-7.67515	1.65e-14	1.02e-12
ENSGALG00000030220_ELMO3	500.367	-2.71104	0.35364	-7.66609	1.77e-14	1.09e-12
ENSGALG00000054913	507.937	-2.4787	0.323556	-7.6608	1.85e-14	1.13e-12
ENSGALG00000039803_LSM12	137.184	-3.26292	0.426129	-7.65712	1.9e-14	1.16e-12
ENSGALG00000010167_PNN	1238.27	-2.43313	0.31854	-7.63839	2.2e-14	1.34e-12
ENSGALG00000042129	719.389	-2.35042	0.308652	-7.61513	2.63e-14	1.6e-12
ENSGALG00000014938_ABHD3	460.284	-2.90829	0.383165	-7.59016	3.2e-14	1.93e-12
ENSGALG00000030801_CCKAR	260.263	2.87381	0.378826	7.5861	3.3e-14	1.98e-12
ENSGALG00000041432_STUB1	643.792	-2.39475	0.315786	-7.58344	3.37e-14	2.02e-12
ENSGALG00000053511_APOLD1	242.659	3.38728	0.44681	7.58102	3.43e-14	2.05e-12
ENSGALG00000030920_APOC3	57.6768	-5.80032	0.76565	-7.57567	3.57e-14	2.12e-12
ENSGALG00000041471_TUBB	1667.66	-2.97745	0.393332	-7.56982	3.74e-14	2.21e-12
ENSGALG00000041592_SMARCC2	848.185	-2.9143	0.385319	-7.56335	3.93e-14	2.32e-12
ENSGALG00000002010_SNIP1	314.825	-2.55999	0.338601	-7.56048	4.02e-14	2.36e-12
ENSGALG00000037633_WIPF2	95.2172	-3.87861	0.513168	-7.55817	4.09e-14	2.39e-12
ENSGALG00000026490_RPS16	4533.91	2.36186	0.312597	7.5556	4.17e-14	2.43e-12
ENSGALG00000048876_LEAP2	504.928	-3.19463	0.42396	-7.53522	4.88e-14	2.83e-12
ENSGALG00000004152_C9orf78	461.173	-2.46637	0.327616	-7.52824	5.14e-14	2.98e-12
ENSGALG00000001803_IWS1	1350.27	-2.23123	0.296589	-7.52297	5.35e-14	3.09e-12
ENSGALG00000005696_ABHD6	1483.4	-2.23248	0.29689	-7.51957	5.5e-14	3.16e-12
ENSGALG00000006861_COQ7	349.737	-2.46149	0.327653	-7.5125	5.8e-14	3.32e-12
ENSGALG00000037065_SC5D	177.732	-3.16323	0.421333	-7.50768	6.02e-14	3.43e-12
ENSGALG00000047199	3264.44	-3.17626	0.423262	-7.50425	6.18e-14	3.51e-12
ENSGALG00000006332_RBM17	569.206	-2.48304	0.331548	-7.48922	6.93e-14	3.92e-12
ENSGALG00000002818_VAT1	993.606	-2.39718	0.320861	-7.47109	7.95e-14	4.48e-12
ENSGALG00000003862_LRRFIP1	1348.63	-2.18377	0.292759	-7.45929	8.7e-14	4.88e-12
ENSGALG00000010652_SCP2	10027.7	-2.34329	0.315185	-7.43465	1.05e-13	5.87e-12
ENSGALG00000006543_PFKL	826.586	-2.28287	0.308445	-7.40122	1.35e-13	7.52e-12
ENSGALG00000011921_DHRS7	2722.57	-2.57061	0.347372	-7.40016	1.36e-13	7.55e-12
ENSGALG00000013073_UPP1	527.769	3.54227	0.479765	7.38334	1.54e-13	8.54e-12
ENSGALG00000030703_CYBRD1	1334.83	2.29822	0.311291	7.38289	1.55e-13	8.54e-12
ENSGALG00000013743_ENPP7	3164.96	-12.6851	1.72279	-7.36312	1.8e-13	9.87e-12
ENSGALG00000035626_DAD1	484.629	-2.35767	0.320444	-7.35751	1.87e-13	1.03e-11
ENSGALG00000048930_CDC37	836.581	-2.24801	0.306126	-7.34341	2.08e-13	1.14e-11
ENSGALG00000011341_UNC93A	288.826	-2.93021	0.399306	-7.33825	2.16e-13	1.18e-11
ENSGALG00000017681_POLR3K	174.985	-3.13065	0.427269	-7.32711	2.35e-13	1.27e-11
ENSGALG00000041253_MYRF	544.099	-3.25167	0.444285	-7.31889	2.5e-13	1.35e-11
ENSGALG00000032577_MECOM	776.728	-2.90501	0.397031	-7.31684	2.54e-13	1.37e-11
ENSGALG00000030436_ND3	168.454	-3.13493	0.428682	-7.31295	2.61e-13	1.4e-11
ENSGALG00000033186_LRRC58	745.557	-2.2422	0.306676	-7.31129	2.65e-13	1.41e-11
ENSGALG00000013265_GYS2	118.574	4.26483	0.583527	7.3087	2.7e-13	1.44e-11
ENSGALG00000054713	217.625	-2.76401	0.378358	-7.30527	2.77e-13	1.47e-11
ENSGALG00000015389_TMPRSS7	150.817	-2.98209	0.408387	-7.30212	2.83e-13	1.5e-11
ENSGALG00000003570_ATIC	941.094	2.23357	0.306041	7.29826	2.92e-13	1.54e-11
ENSGALG00000010812_RYR2	1022.68	2.36772	0.324681	7.29246	3.04e-13	1.6e-11
ENSGALG00000033683_PHOSPHO1	1200.6	-2.87111	0.394156	-7.2842	3.24e-13	1.69e-11
ENSGALG00000039333_SLC6A20	258.233	10.7947	1.48419	7.27313	3.51e-13	1.83e-11
ENSGALG00000005237_FGD3	2114	-2.12931	0.29314	-7.2638	3.76e-13	1.95e-11
ENSGALG00000008249_DNAJC2	864.364	-2.26307	0.31156	-7.26367	3.77e-13	1.95e-11
ENSGALG00000047578_SELENOP1	4004.29	2.62322	0.361693	7.25262	4.09e-13	2.11e-11
ENSGALG00000009250_HNRNPA3	6149.31	-2.2531	0.311728	-7.22777	4.91e-13	2.52e-11
ENSGALG00000032307_DDX23	1024.68	-2.37512	0.329226	-7.21427	5.42e-13	2.78e-11
ENSGALG00000039682_HCLS1	736.506	-2.58341	0.358891	-7.19831	6.1e-13	3.11e-11
ENSGALG00000000920_CGN	3369.75	-2.35855	0.327792	-7.19528	6.23e-13	3.17e-11
ENSGALG00000032986_CFTR	973.164	2.26272	0.315045	7.18222	6.86e-13	3.48e-11
ENSGALG00000032930_NCL	5000.17	-2.21778	0.30881	-7.18171	6.88e-13	3.48e-11
ENSGALG00000010469_CYP4B7	120.401	6.23219	0.868286	7.17758	7.1e-13	3.58e-11
ENSGALG00000007914_DNAJC1	356.495	-2.54769	0.355239	-7.17177	7.4e-13	3.72e-11
ENSGALG00000002666_RAB11FIP3	578.708	-2.25753	0.315142	-7.16353	7.86e-13	3.92e-11
ENSGALG00000016764_EIF5B	2730.5	-2.14717	0.299722	-7.16387	7.84e-13	3.92e-11
ENSGALG00000038678_EPB41L3	2100.12	-2.06283	0.288157	-7.1587	8.14e-13	4.05e-11
ENSGALG00000026757_DHFR	357.149	-2.68421	0.375176	-7.15454	8.4e-13	4.16e-11
ENSGALG00000049812_SLC66A2	842.18	2.17787	0.304577	7.15047	8.65e-13	4.27e-11
ENSGALG00000006344_GSTT1	1550.23	-2.86691	0.401369	-7.14282	9.14e-13	4.5e-11
ENSGALG00000036831	1379.57	-2.63955	0.370149	-7.13106	9.96e-13	4.89e-11
ENSGALG00000051187_CCDC130	108.819	-3.24062	0.454643	-7.12784	1.02e-12	4.99e-11
ENSGALG00000007882	271.852	-2.51011	0.352418	-7.12254	1.06e-12	5.17e-11
ENSGALG00000001824	1850.99	-3.10411	0.436121	-7.11754	1.1e-12	5.34e-11
ENSGALG00000010997_DFNA5	963.187	3.00445	0.422153	7.11698	1.1e-12	5.35e-11
ENSGALG00000004236_TRAF3IP1	279.63	-2.64446	0.371801	-7.11256	1.14e-12	5.5e-11
ENSGALG00000046347_FOXRED1	779.176	-2.44723	0.344255	-7.10878	1.17e-12	5.64e-11
ENSGALG00000040368_CALR	8534.85	-2.03446	0.286414	-7.10322	1.22e-12	5.85e-11
ENSGALG00000014976_GATA6	452.718	-2.75499	0.389056	-7.08123	1.43e-12	6.84e-11
ENSGALG00000002853_CFDP1	372.562	-2.30021	0.32522	-7.07277	1.52e-12	7.25e-11
ENSGALG00000016984_ZC3H13	2728.06	-2.18816	0.309853	-7.06195	1.64e-12	7.78e-11
ENSGALG00000045122_AKR1B1	2073.19	2.29673	0.325212	7.06226	1.64e-12	7.78e-11
ENSGALG00000038618_ONECUT1	97.3951	-10.7065	1.51805	-7.05275	1.75e-12	8.29e-11
ENSGALG00000006160_HNRNPA0	418.311	-2.39883	0.34022	-7.05083	1.78e-12	8.35e-11
ENSGALG00000052324	347.472	-2.48086	0.351844	-7.05101	1.78e-12	8.35e-11
ENSGALG00000049751	1268.42	2.12813	0.301933	7.04836	1.81e-12	8.48e-11
ENSGALG00000038582_SLC36A1	691.335	-2.64167	0.375411	-7.03674	1.97e-12	9.19e-11
ENSGALG00000047833_MED11	92.1809	-3.37222	0.48051	-7.01801	2.25e-12	1.05e-10
ENSGALG00000014170_MOGAT2	418.414	-2.44954	0.349323	-7.01225	2.35e-12	1.09e-10
ENSGALG00000007016_FAM169B	237.558	-2.78472	0.397308	-7.00897	2.4e-12	1.11e-10
ENSGALG00000051668	43.6124	-6.54241	0.935605	-6.9927	2.7e-12	1.24e-10
ENSGALG00000028880_FDPS	436.57	-2.48166	0.355064	-6.98932	2.76e-12	1.27e-10
ENSGALG00000010903_RASGEF1B	269.561	2.55566	0.366073	6.9813	2.92e-12	1.34e-10
ENSGALG00000034077_KCNK5	2891.82	-2.04885	0.293722	-6.97546	3.05e-12	1.39e-10
ENSGALG00000031238_SLIRP	317.622	-2.48579	0.356471	-6.97335	3.09e-12	1.41e-10
ENSGALG00000036552_PDAP1	344.869	-2.53516	0.363543	-6.9735	3.09e-12	1.41e-10
ENSGALG00000004192_SLTM	370.085	-2.32211	0.333576	-6.96127	3.37e-12	1.53e-10
ENSGALG00000005103_GDPD1	1895.45	-2.37123	0.3407	-6.95989	3.41e-12	1.54e-10
ENSGALG00000053336	515.409	2.46554	0.354466	6.95565	3.51e-12	1.58e-10
ENSGALG00000006113_ZNF326	946.585	-2.14265	0.308242	-6.95119	3.62e-12	1.63e-10
ENSGALG00000015877_SH3BGRL2	162.118	2.99908	0.432053	6.94146	3.88e-12	1.74e-10
ENSGALG00000033572_SORT1	706.073	-2.71955	0.392245	-6.93329	4.11e-12	1.83e-10
ENSGALG00000049072	109.807	-2.98229	0.430375	-6.92952	4.22e-12	1.88e-10
ENSGALG00000047981	81.3682	-3.35689	0.484846	-6.92363	4.4e-12	1.95e-10
ENSGALG00000002060_TAF15	681.844	-2.12816	0.307734	-6.91558	4.66e-12	2.06e-10
ENSGALG00000026231_ARID3A	271.855	-2.60208	0.376339	-6.91418	4.71e-12	2.06e-10
ENSGALG00000036677_ITSN1	1644.46	-2.13782	0.309183	-6.91444	4.7e-12	2.06e-10
ENSGALG00000054869_U8	63.6633	-3.84115	0.555486	-6.91493	4.68e-12	2.06e-10
ENSGALG00000049450	2636.73	-2.42652	0.351058	-6.91201	4.78e-12	2.09e-10
ENSGALG00000001320_CYP1A2	184.56	-10.1879	1.48022	-6.8827	5.87e-12	2.55e-10
ENSGALG00000026493_RALB	2013.31	-2.06388	0.299861	-6.88279	5.87e-12	2.55e-10
ENSGALG00000017804_Y_RNA	610.495	-8.17997	1.1887	-6.88147	5.92e-12	2.57e-10
ENSGALG00000008883_TCF7L2	596.442	-2.57849	0.374966	-6.87661	6.13e-12	2.65e-10
ENSGALG00000008520_EIF4G1	2438.76	-2.18954	0.318567	-6.87309	6.28e-12	2.71e-10
ENSGALG00000047730	78.1526	-10.3868	1.51317	-6.86427	6.68e-12	2.87e-10
ENSGALG00000004078	540.487	-2.20528	0.322124	-6.84605	7.59e-12	3.25e-10
ENSGALG00000032002_RPL34	5293	2.15455	0.315146	6.83668	8.1e-12	3.46e-10
ENSGALG00000036283_RBM8A	170.934	-3.08816	0.452206	-6.8291	8.55e-12	3.64e-10
ENSGALG00000042723_SCARNA7	973.004	-2.14974	0.315301	-6.81806	9.23e-12	3.92e-10
ENSGALG00000010120_KIF2C	182.599	-2.65301	0.389275	-6.81527	9.41e-12	3.99e-10
ENSGALG00000023691_ENTPD7	382.965	-2.21473	0.32508	-6.81287	9.57e-12	4.04e-10
ENSGALG00000020262_NKAPL	514.341	-2.28822	0.335974	-6.81069	9.71e-12	4.09e-10
ENSGALG00000000474_RPL36	1160.33	2.15321	0.316299	6.80752	9.93e-12	4.17e-10
ENSGALG00000039209_WIF1	169.177	2.87587	0.42276	6.80261	1.03e-11	4.31e-10
ENSGALG00000049138_TAF6	122.153	-3.02158	0.44508	-6.78883	1.13e-11	4.73e-10
ENSGALG00000005632_MRVI1	944.129	2.30602	0.339969	6.78303	1.18e-11	4.91e-10
ENSGALG00000052600	76.7797	-10.3693	1.53077	-6.7739	1.25e-11	5.21e-10
ENSGALG00000047166	121.196	-2.90331	0.428677	-6.77272	1.26e-11	5.24e-10
ENSGALG00000027068_HDGFRP2	815.194	-2.0226	0.299124	-6.76175	1.36e-11	5.64e-10
ENSGALG00000051839_U3	180.307	-2.6885	0.397691	-6.76027	1.38e-11	5.68e-10
ENSGALG00000039326_HSBP1L1	103.227	3.4375	0.508666	6.75788	1.4e-11	5.76e-10
ENSGALG00000001382_CDC2L1	1014.26	-2.07709	0.307786	-6.74849	1.49e-11	6.13e-10
ENSGALG00000008185_AOX1	187.251	2.68435	0.39788	6.74664	1.51e-11	6.19e-10
ENSGALG00000008795_GPAM	544.529	-2.16242	0.320534	-6.74633	1.52e-11	6.19e-10
ENSGALG00000010301_EIF2B2	469.705	-2.2024	0.32684	-6.73847	1.6e-11	6.51e-10
ENSGALG00000031734_AQP11	367.606	-2.22884	0.330877	-6.73616	1.63e-11	6.6e-10
ENSGALG00000031853_PIGBOS1	83.9966	4.00622	0.595184	6.73107	1.68e-11	6.82e-10
ENSGALG00000023066_DNAJA1	3570.15	-2.06635	0.307041	-6.7299	1.7e-11	6.85e-10
ENSGALG00000031120_HNRNPH2	6317.93	-1.89573	0.281867	-6.72564	1.75e-11	7.04e-10
ENSGALG00000001309_SNF8	325.601	-2.30771	0.343277	-6.7226	1.79e-11	7.17e-10
ENSGALG00000003505_LACTB	475.811	-2.15087	0.320526	-6.71042	1.94e-11	7.77e-10
ENSGALG00000032249_MAX	230.819	-2.84744	0.424586	-6.70639	2e-11	7.97e-10
ENSGALG00000052286_MGAT1	409.455	-3.1762	0.473662	-6.70562	2.01e-11	7.99e-10
ENSGALG00000020554_ADAMTSL1	356.3	2.38783	0.356519	6.69761	2.12e-11	8.42e-10
ENSGALG00000037441	1657.31	2.16526	0.323562	6.69193	2.2e-11	8.71e-10
ENSGALG00000052842_ANKRD11	4827.42	-2.22689	0.332764	-6.6921	2.2e-11	8.71e-10
ENSGALG00000020160_ADH6	2004.69	-2.20554	0.329615	-6.69127	2.21e-11	8.72e-10
ENSGALG00000050634	81.1509	-4.53718	0.678451	-6.68756	2.27e-11	8.92e-10
ENSGALG00000007092_LYSMD4	178.394	-2.8227	0.423224	-6.66952	2.57e-11	1.01e-09
ENSGALG00000008317_SDSL	499.859	-2.78247	0.418164	-6.65401	2.85e-11	1.12e-09
ENSGALG00000006118_ZC3H18	235.571	-2.36488	0.355698	-6.64856	2.96e-11	1.15e-09
ENSGALG00000048829	263.593	-2.62231	0.394447	-6.64808	2.97e-11	1.16e-09
ENSGALG00000032730_NOP56	461.588	-2.13867	0.322681	-6.62783	3.41e-11	1.32e-09
ENSGALG00000009415_SMOC1	420.009	2.6522	0.400443	6.62315	3.52e-11	1.36e-09
ENSGALG00000013365	1489.87	-1.94236	0.29338	-6.62063	3.58e-11	1.38e-09
ENSGALG00000007130_RAC1	576.655	-2.24954	0.340058	-6.61516	3.71e-11	1.43e-09
ENSGALG00000016513_PPM1G	511.104	-2.17407	0.328632	-6.61551	3.7e-11	1.43e-09
ENSGALG00000003741_MYO18A	2295.92	-2.22943	0.337169	-6.61219	3.79e-11	1.45e-09
ENSGALG00000041502_ANGPT1L	1658.37	-1.96192	0.296851	-6.60911	3.87e-11	1.47e-09
ENSGALG00000054005_PPP1R37	550.431	-2.44717	0.370263	-6.60927	3.86e-11	1.47e-09
ENSGALG00000048624_SGPP2	229.852	-2.7103	0.410508	-6.6023	4.05e-11	1.54e-09
ENSGALG00000016731_MRPL19	457.859	-2.14747	0.326059	-6.58615	4.51e-11	1.71e-09
ENSGALG00000045738	908.012	-2.49686	0.379773	-6.5746	4.88e-11	1.85e-09
ENSGALG00000011046_SNX10	349.423	2.27927	0.346787	6.57253	4.95e-11	1.87e-09
ENSGALG00000033129_ZFP36L2	710.278	-2.27478	0.347456	-6.54694	5.87e-11	2.21e-09
ENSGALG00000008550_MRPS5	461.214	-2.20157	0.336587	-6.54086	6.12e-11	2.3e-09
ENSGALG00000050749	248.159	3.26667	0.499448	6.54057	6.13e-11	2.3e-09
ENSGALG00000030775_HIGD1C	731.358	-2.0768	0.318029	-6.53022	6.57e-11	2.46e-09
ENSGALG00000011391_AMN	360.46	-2.48555	0.380799	-6.52719	6.7e-11	2.5e-09
ENSGALG00000027562_PURG	212.245	-2.89779	0.444141	-6.52449	6.82e-11	2.54e-09
ENSGALG00000054926	164.803	-3.68411	0.564809	-6.52275	6.9e-11	2.56e-09
ENSGALG00000037172_IK	1071.27	-2.02142	0.309953	-6.52171	6.95e-11	2.57e-09
ENSGALG00000053196	87.9017	-3.00236	0.460551	-6.51906	7.07e-11	2.61e-09
ENSGALG00000038290_P4HB	19689.6	-2.03689	0.313678	-6.49358	8.38e-11	3.09e-09
ENSGALG00000017926_7SK	610125	2.10427	0.324699	6.48068	9.13e-11	3.36e-09
ENSGALG00000025958_U3	2355.4	2.78316	0.429781	6.47576	9.43e-11	3.46e-09
ENSGALG00000053999_VPS37D	114.826	3.06812	0.474461	6.46654	1e-10	3.67e-09
ENSGALG00000004386_SOX9	66.0374	-3.35928	0.519608	-6.46503	1.01e-10	3.7e-09
ENSGALG00000053095_PC	307.099	-2.19511	0.339702	-6.46186	1.03e-10	3.77e-09
ENSGALG00000003748_ANO5	6615.79	-2.26527	0.350807	-6.45733	1.07e-10	3.87e-09
ENSGALG00000046950	137.332	-2.76881	0.429961	-6.43968	1.2e-10	4.34e-09
ENSGALG00000026944_ARF6	942.25	-2.20316	0.342197	-6.43828	1.21e-10	4.37e-09
ENSGALG00000026137_CDKN2B	1579.01	-2.42737	0.37798	-6.42197	1.35e-10	4.85e-09
ENSGALG00000050400	295.568	-2.29996	0.358506	-6.41541	1.4e-10	5.05e-09
ENSGALG00000016586_CCDC25	535.643	-2.01455	0.314167	-6.41237	1.43e-10	5.14e-09
ENSGALG00000031426_TMBIM6	3612.94	-2.23673	0.34889	-6.41098	1.45e-10	5.18e-09
ENSGALG00000014589	663.687	-2.26325	0.35309	-6.40983	1.46e-10	5.2e-09
ENSGALG00000044406	396.131	-2.25855	0.35249	-6.40742	1.48e-10	5.27e-09
ENSGALG00000026558_ZNF362	116.358	-2.9047	0.453408	-6.40638	1.49e-10	5.3e-09
ENSGALG00000002880_AARSD1	548.415	-2.03291	0.317458	-6.40371	1.52e-10	5.38e-09
ENSGALG00000002661_YWHAE	2887.85	-1.85681	0.290046	-6.40179	1.54e-10	5.43e-09
ENSGALG00000042875_HMGB1	2317.34	-1.87258	0.292719	-6.39718	1.58e-10	5.59e-09
ENSGALG00000009545_SLC25A12	557.775	2.12898	0.33287	6.39582	1.6e-10	5.63e-09
ENSGALG00000041857_ZC3H15	1997.78	-1.86248	0.291717	-6.38454	1.72e-10	6.04e-09
ENSGALG00000005507_NONO	1821.54	-1.91041	0.299456	-6.37962	1.78e-10	6.23e-09
ENSGALG00000015069_B4GALT4	293.676	-2.14402	0.336363	-6.37413	1.84e-10	6.44e-09
ENSGALG00000006117_UBFD1	320.205	-2.28668	0.359277	-6.36467	1.96e-10	6.83e-09
ENSGALG00000006061_RAP2C	904.262	-2.21536	0.348894	-6.34968	2.16e-10	7.51e-09
ENSGALG00000010286_DLST	1157.11	-1.93432	0.304674	-6.34882	2.17e-10	7.54e-09
ENSGALG00000008419_SEC13	2047.07	-1.87615	0.295568	-6.3476	2.19e-10	7.58e-09
ENSGALG00000039891_ANP32E	7441.88	-1.97045	0.31073	-6.34134	2.28e-10	7.88e-09
ENSGALG00000013352_SF3B4	301.9	-2.4136	0.380934	-6.33601	2.36e-10	8.14e-09
ENSGALG00000029260_H-RAS	2030.48	-1.91538	0.303338	-6.31434	2.71e-10	9.34e-09
ENSGALG00000014648_CETN3	388.572	-2.0976	0.332254	-6.31325	2.73e-10	9.39e-09
ENSGALG00000029897_RPL30	3121.73	2.0175	0.320211	6.30052	2.97e-10	1.02e-08
ENSGALG00000029484_RIC8B	2450.37	-1.8665	0.296402	-6.29718	3.03e-10	1.04e-08
ENSGALG00000037443_CRAT	1739.69	-1.8193	0.289203	-6.29074	3.16e-10	1.08e-08
ENSGALG00000038109_MRPL45	460.257	-2.02726	0.322473	-6.28659	3.25e-10	1.1e-08
ENSGALG00000013414_PDLIM3	2382.64	2.12611	0.338265	6.28536	3.27e-10	1.11e-08
ENSGALG00000046708_PTGES	349.19	2.34471	0.373157	6.28344	3.31e-10	1.12e-08
ENSGALG00000010127_GLO1	2560.09	1.97334	0.314167	6.28117	3.36e-10	1.14e-08
ENSGALG00000017234_FOLH1	409.768	-2.07013	0.329629	-6.2802	3.38e-10	1.14e-08
ENSGALG00000034187_SEPTIN8	342.29	-2.2269	0.354655	-6.27905	3.41e-10	1.15e-08
ENSGALG00000010124_RPS8	12557.5	-1.86627	0.297346	-6.27644	3.46e-10	1.16e-08
ENSGALG00000019358_LLPH	225.885	-2.408	0.383655	-6.27647	3.46e-10	1.16e-08
ENSGALG00000004098_STK4	881.529	-1.86669	0.297836	-6.26751	3.67e-10	1.23e-08
ENSGALG00000028983_HOXA9	74.6432	5.94498	0.949273	6.26267	3.78e-10	1.26e-08
ENSGALG00000039474_ID4	313.319	2.4401	0.38969	6.26164	3.81e-10	1.27e-08
ENSGALG00000031496_SPINK5	132.103	2.77871	0.444092	6.25707	3.92e-10	1.3e-08
ENSGALG00000000674_MYO1D	2668.48	-1.93037	0.308702	-6.25317	4.02e-10	1.33e-08
ENSGALG00000053606	36.2498	-4.96342	0.794081	-6.25053	4.09e-10	1.35e-08
ENSGALG00000042184_ALDH4A1	457.21	-2.1356	0.341966	-6.24506	4.24e-10	1.4e-08
ENSGALG00000004588_RPS14	3173.1	1.92066	0.308118	6.23351	4.56e-10	1.5e-08
ENSGALG00000002563_TPM4	151.343	-3.42625	0.549909	-6.23057	4.65e-10	1.53e-08
ENSGALG00000012834_AKR1D1	436.49	-2.87098	0.461148	-6.22571	4.79e-10	1.57e-08
ENSGALG00000006565	1531.63	-1.88679	0.303485	-6.21709	5.06e-10	1.66e-08
ENSGALG00000038003_EDF1	6764.7	-1.9253	0.310188	-6.2069	5.4e-10	1.76e-08
ENSGALG00000054799_SPIC	98.7208	6.95176	1.11997	6.20709	5.4e-10	1.76e-08
ENSGALG00000035850_CSAD	1130.01	-2.11509	0.341258	-6.19792	5.72e-10	1.86e-08
ENSGALG00000048606	45.0939	-4.26966	0.69001	-6.18782	6.1e-10	1.98e-08
ENSGALG00000001950_PMPCA	369.638	-2.18618	0.353424	-6.18572	6.18e-10	2e-08
ENSGALG00000042819	96.2083	-2.73456	0.442131	-6.18496	6.21e-10	2.01e-08
ENSGALG00000011635_TFCP2L1	70.5677	4.07783	0.659922	6.17925	6.44e-10	2.08e-08
ENSGALG00000015720_CHODL	40.4784	-4.75964	0.770353	-6.17851	6.47e-10	2.08e-08
ENSGALG00000012971_CCDC170	90.9922	3.39694	0.549859	6.17783	6.5e-10	2.09e-08
ENSGALG00000014381_HNRNPAB	2726.02	-1.76504	0.28589	-6.17384	6.66e-10	2.13e-08
ENSGALG00000030569_TRIM41	284.648	-2.32478	0.376534	-6.17417	6.65e-10	2.13e-08
ENSGALG00000045238	152.572	-2.46082	0.398915	-6.16878	6.88e-10	2.2e-08
ENSGALG00000049136	251.47	-2.33569	0.378878	-6.16475	7.06e-10	2.25e-08
ENSGALG00000025743_CDR2	1852.04	-1.77361	0.287775	-6.16317	7.13e-10	2.27e-08
ENSGALG00000006300_LDHA	10344.2	-2.36605	0.383948	-6.16241	7.16e-10	2.27e-08
ENSGALG00000012112_DBI	2490.78	-1.88336	0.305632	-6.16218	7.18e-10	2.27e-08
ENSGALG00000003765_A1CF	1287.83	-2.33178	0.378459	-6.16124	7.22e-10	2.28e-08
ENSGALG00000017145_MPHOSPH8	301.846	-2.22979	0.362901	-6.14437	8.03e-10	2.53e-08
ENSGALG00000048754	173.343	-2.35171	0.382805	-6.14336	8.08e-10	2.54e-08
ENSGALG00000011475_RPL37A	3011.07	2.03349	0.331056	6.14244	8.13e-10	2.55e-08
ENSGALG00000009092_STON1	1054.13	1.95024	0.317587	6.1408	8.21e-10	2.57e-08
ENSGALG00000001521_VPS26B	526.409	-1.93176	0.31511	-6.13044	8.76e-10	2.74e-08
ENSGALG00000054354	214.731	2.5308	0.413008	6.12771	8.92e-10	2.78e-08
ENSGALG00000030419_GLS2	648.684	1.97143	0.321793	6.12638	8.99e-10	2.8e-08
ENSGALG00000051301_KHK	507.819	-2.49161	0.406962	-6.12247	9.21e-10	2.86e-08
ENSGALG00000039196_NECTIN1	1061.12	-2.48491	0.406206	-6.11736	9.51e-10	2.95e-08
ENSGALG00000003941_FUBP3	1067.94	-2.17857	0.356223	-6.11575	9.61e-10	2.97e-08
ENSGALG00000035690_RAPGEFL1	339.293	-2.55923	0.418502	-6.11522	9.64e-10	2.98e-08
ENSGALG00000023256_RNF8	204.173	-2.27114	0.371443	-6.11435	9.69e-10	2.98e-08
ENSGALG00000050352_BCL2L15	710.932	-2.18688	0.357664	-6.11433	9.7e-10	2.98e-08
ENSGALG00000031723_BANF1	85.5961	-3.24673	0.531613	-6.10731	1.01e-09	3.11e-08
ENSGALG00000047027	56.6676	-3.45817	0.567586	-6.09276	1.11e-09	3.4e-08
ENSGALG00000027835_PCBD1	209.002	-2.31425	0.379906	-6.09164	1.12e-09	3.41e-08
ENSGALG00000036790_RPS27A	3962.4	1.75732	0.288478	6.09169	1.12e-09	3.41e-08
ENSGALG00000015702_PTGR1	3409.31	-2.23559	0.367021	-6.09118	1.12e-09	3.41e-08
ENSGALG00000047139	220.847	-2.19479	0.360443	-6.08914	1.14e-09	3.45e-08
ENSGALG00000052014_PCK2	1250.77	-2.0137	0.330715	-6.08893	1.14e-09	3.45e-08
ENSGALG00000026727_SLC30A10	963.188	-2.11061	0.347066	-6.0813	1.19e-09	3.61e-08
ENSGALG00000001475_STMN1	522.049	2.23848	0.368335	6.07729	1.22e-09	3.69e-08
ENSGALG00000015548_RNF20	1755.09	-2.14652	0.353335	-6.07503	1.24e-09	3.74e-08
ENSGALG00000017862_SNORA23	74.8861	3.62139	0.596299	6.0731	1.25e-09	3.77e-08
ENSGALG00000052771	46.8329	-5.61341	0.924407	-6.07245	1.26e-09	3.78e-08
ENSGALG00000006462_PPP2CA	1236.03	-1.81148	0.29855	-6.0676	1.3e-09	3.89e-08
ENSGALG00000003120_NCOR2	2953.95	-2.07275	0.341756	-6.06502	1.32e-09	3.94e-08
ENSGALG00000007395	2157.85	-2.08074	0.343231	-6.06222	1.34e-09	4.01e-08
ENSGALG00000047827_TMEM86A	1221.07	-1.96359	0.324415	-6.0527	1.42e-09	4.24e-08
ENSGALG00000015917_EEF1A1	68457.3	1.75522	0.290054	6.05136	1.44e-09	4.27e-08
ENSGALG00000030466_CS	1242.59	-1.87674	0.310599	-6.04234	1.52e-09	4.51e-08
ENSGALG00000004902_TOM1L2	1123.71	-1.867	0.309201	-6.03813	1.56e-09	4.62e-08
ENSGALG00000054577	60.4338	-3.37475	0.559394	-6.03287	1.61e-09	4.76e-08
ENSGALG00000026089_SLC26A6	640.639	-2.17367	0.360365	-6.03186	1.62e-09	4.78e-08
ENSGALG00000011686_SEMA5B	2482.97	-2.11898	0.351549	-6.02756	1.66e-09	4.9e-08
ENSGALG00000046338_PYY	35.5882	-5.72149	0.949672	-6.0247	1.69e-09	4.98e-08
ENSGALG00000049063_INAFM2	74.9532	3.37302	0.560114	6.02203	1.72e-09	5.05e-08
ENSGALG00000010109_RNF220	332.052	-2.03393	0.337858	-6.02007	1.74e-09	5.1e-08
ENSGALG00000008443_ARHGDIA	2898.31	-1.83443	0.30477	-6.01904	1.75e-09	5.12e-08
ENSGALG00000028119_CDC42SE1	600.406	-2.11573	0.351813	-6.01379	1.81e-09	5.28e-08
ENSGALG00000032644	210.79	-2.57212	0.427739	-6.01328	1.82e-09	5.29e-08
ENSGALG00000031896_GSE1	200.224	-2.36243	0.392999	-6.01128	1.84e-09	5.35e-08
ENSGALG00000033256_PCSK5	4925.48	-1.91622	0.318971	-6.00751	1.88e-09	5.46e-08
ENSGALG00000031447	118.406	-2.56864	0.427636	-6.0066	1.89e-09	5.48e-08
ENSGALG00000010303	3383.87	-2.19871	0.36615	-6.00494	1.91e-09	5.53e-08
ENSGALG00000004881	1269.02	-1.84304	0.307216	-5.99917	1.98e-09	5.72e-08
ENSGALG00000026151_CEP250	569.85	-2.0831	0.347282	-5.9983	1.99e-09	5.74e-08
ENSGALG00000003597_AK2	1904.7	-1.72318	0.287569	-5.99223	2.07e-09	5.94e-08
ENSGALG00000054841_Metazoa_SRP	101.254	4.62679	0.77235	5.99054	2.09e-09	5.99e-08
ENSGALG00000007493_NSDHL	495.126	-2.19648	0.366821	-5.98787	2.13e-09	6.08e-08
ENSGALG00000047148_LIPT2	521.469	-1.8624	0.311389	-5.98094	2.22e-09	6.33e-08
ENSGALG00000009300_NUMB	1444.63	-1.91831	0.32091	-5.97771	2.26e-09	6.45e-08
ENSGALG00000048165	98.4156	-2.62022	0.439073	-5.96762	2.41e-09	6.85e-08
ENSGALG00000052799	77.143	-3.10844	0.521047	-5.96577	2.43e-09	6.91e-08
ENSGALG00000010551_CDC42EP3	671.542	2.18302	0.366639	5.95414	2.61e-09	7.41e-08
ENSGALG00000016774_NPAS2	561.165	-2.372	0.398543	-5.95167	2.65e-09	7.49e-08
ENSGALG00000017808_SNORD83A	39.4501	-9.40725	1.58061	-5.95165	2.65e-09	7.49e-08
ENSGALG00000036359_RUVBL2	310.859	-1.97581	0.332094	-5.94956	2.69e-09	7.58e-08
ENSGALG00000026978_RPL29	3494.45	2.05134	0.344806	5.94924	2.69e-09	7.58e-08
ENSGALG00000008120_TLE3	605.988	-2.21539	0.372671	-5.94464	2.77e-09	7.78e-08
ENSGALG00000015040_SLC16A10	2435.9	-2.04	0.343257	-5.94308	2.8e-09	7.84e-08
ENSGALG00000010385	472.588	-1.91305	0.322497	-5.932	2.99e-09	8.37e-08
ENSGALG00000002160_B2M	19358.1	-2.08	0.350691	-5.93115	3.01e-09	8.4e-08
ENSGALG00000050150_STX5	63.4113	-3.09816	0.522434	-5.93023	3.03e-09	8.43e-08
ENSGALG00000029673_TBC1D19	99.5977	2.88381	0.486317	5.92989	3.03e-09	8.43e-08
ENSGALG00000007676_EME1	144.376	-2.33488	0.394026	-5.92569	3.11e-09	8.64e-08
ENSGALG00000007381	310.063	-2.4957	0.421447	-5.92175	3.19e-09	8.83e-08
ENSGALG00000025800	819.879	-2.62154	0.443185	-5.91523	3.31e-09	9.17e-08
ENSGALG00000038364_CCN3	87.9872	3.26617	0.552469	5.91196	3.38e-09	9.34e-08
ENSGALG00000003935_PBLD	456.53	-2.2938	0.388467	-5.90476	3.53e-09	9.74e-08
ENSGALG00000035751_ONECUT2	39.5047	-4.4654	0.756575	-5.90212	3.59e-09	9.88e-08
ENSGALG00000032588_ARPC1B	717.278	1.97087	0.334255	5.8963	3.72e-09	1.02e-07
ENSGALG00000032642_SMARCC1	1108.88	-2.09258	0.354953	-5.89535	3.74e-09	1.03e-07
ENSGALG00000047002	30.6165	-9.28819	1.57735	-5.88848	3.9e-09	1.06e-07
ENSGALG00000052057	326.659	-2.32842	0.395406	-5.88868	3.89e-09	1.06e-07
ENSGALG00000015339_RPL24	2554.12	1.82955	0.311448	5.87434	4.25e-09	1.16e-07
ENSGALG00000007412_MPZL2	285.309	-2.13846	0.364074	-5.87368	4.26e-09	1.16e-07
ENSGALG00000043053_DAO	132.728	-2.40692	0.409901	-5.87196	4.31e-09	1.17e-07
ENSGALG00000024094_UBAP2L	944.357	-2.16812	0.369372	-5.86976	4.36e-09	1.18e-07
ENSGALG00000005206_ACSL3	835.78	-1.76605	0.301047	-5.86636	4.45e-09	1.21e-07
ENSGALG00000004106_DHCR7	277.196	-2.02037	0.344779	-5.85991	4.63e-09	1.25e-07
ENSGALG00000005598_ZNF598	1020.86	-1.73842	0.29667	-5.85978	4.63e-09	1.25e-07
ENSGALG00000017290	418.15	1.94618	0.332178	5.85885	4.66e-09	1.26e-07
ENSGALG00000012769_CHPT1	436.46	1.92775	0.329207	5.85574	4.75e-09	1.27e-07
ENSGALG00000015252_ST3GAL6	169.465	2.33914	0.399454	5.85585	4.75e-09	1.27e-07
ENSGALG00000011404_HOPX	322.027	2.78443	0.475741	5.85282	4.83e-09	1.29e-07
ENSGALG00000052268_SSBP4	208.956	-2.32238	0.396928	-5.85089	4.89e-09	1.31e-07
ENSGALG00000009963_LYZ	213.452	2.18524	0.37371	5.84742	4.99e-09	1.33e-07
ENSGALG00000040724_AKAP9	8910.43	-1.75475	0.300109	-5.84705	5e-09	1.33e-07
ENSGALG00000032546_MYEF2	586.957	-1.89927	0.324884	-5.84599	5.04e-09	1.34e-07
ENSGALG00000033854_CSF1	140.048	2.44609	0.418435	5.84579	5.04e-09	1.34e-07
ENSGALG00000047632	30.4363	-5.2105	0.891471	-5.84483	5.07e-09	1.34e-07
ENSGALG00000012426_DDHD1	488.035	-2.55735	0.438284	-5.8349	5.38e-09	1.42e-07
ENSGALG00000047634	37.9948	-4.34562	0.74654	-5.82101	5.85e-09	1.55e-07
ENSGALG00000002187_HSD17B4	7054.78	-1.72307	0.296153	-5.81818	5.95e-09	1.57e-07
ENSGALG00000005138_KCTD10	515.285	-1.9387	0.333241	-5.81769	5.97e-09	1.57e-07
ENSGALG00000014432_RPS20	4027.86	1.94112	0.333696	5.81702	5.99e-09	1.57e-07
ENSGALG00000012232_DNAAF2	181.715	-2.26583	0.389554	-5.81647	6.01e-09	1.58e-07
ENSGALG00000027198_TMEM47	403.803	2.04186	0.351255	5.81304	6.13e-09	1.61e-07
ENSGALG00000019157_SMPX	256.667	2.58664	0.445403	5.80741	6.34e-09	1.66e-07
ENSGALG00000016781_MAP4K4	1897.5	-1.83511	0.316081	-5.80582	6.41e-09	1.67e-07
ENSGALG00000039791_DOLPP1	378.886	-1.87237	0.322675	-5.80265	6.53e-09	1.7e-07
ENSGALG00000046293	218.935	2.23641	0.385424	5.80247	6.53e-09	1.7e-07
ENSGALG00000030139	665.622	-2.718	0.468663	-5.79949	6.65e-09	1.73e-07
ENSGALG00000016797_FHL2	3460.32	2.14267	0.36994	5.79193	6.96e-09	1.8e-07
ENSGALG00000002457_SIL1	232.277	-2.02107	0.34909	-5.78953	7.06e-09	1.83e-07
ENSGALG00000042929_GJC3	162.393	-2.24515	0.388013	-5.78628	7.2e-09	1.86e-07
ENSGALG00000051276_GATAD2B	416.606	-2.27911	0.394077	-5.78341	7.32e-09	1.89e-07
ENSGALG00000007792_PFDN4	433.5	1.95108	0.337786	5.77609	7.65e-09	1.97e-07
ENSGALG00000029588	210.926	-2.51054	0.434684	-5.77556	7.67e-09	1.97e-07
ENSGALG00000043379_RPL14	3078.6	1.87028	0.324003	5.77243	7.81e-09	2.01e-07
ENSGALG00000026989_HOXA7	234.495	2.19719	0.381432	5.76037	8.39e-09	2.15e-07
ENSGALG00000016761_LYG2	146.785	-3.13904	0.545127	-5.75837	8.49e-09	2.17e-07
ENSGALG00000035836_LDHB	1659.11	2.03404	0.353216	5.75862	8.48e-09	2.17e-07
ENSGALG00000029383_SLC25A11	652.76	-1.8056	0.31368	-5.75619	8.6e-09	2.19e-07
ENSGALG00000054822	1206.52	-1.84313	0.3208	-5.74542	9.17e-09	2.33e-07
ENSGALG00000047174	64.2625	8.78659	1.53038	5.74145	9.39e-09	2.38e-07
ENSGALG00000004965_SLC27A4	2127.12	-1.71233	0.298415	-5.73808	9.58e-09	2.43e-07
ENSGALG00000009615_RRP15	223.873	-2.25102	0.39234	-5.73742	9.61e-09	2.43e-07
ENSGALG00000052051_COPS9	71.4138	-2.98604	0.520616	-5.73558	9.72e-09	2.46e-07
ENSGALG00000002952_NRG4	325.074	-1.97037	0.343843	-5.73041	1e-08	2.53e-07
ENSGALG00000046952	821.508	-1.71449	0.299549	-5.72356	1.04e-08	2.63e-07
ENSGALG00000016400_RSAD2	144.252	-2.51539	0.439523	-5.723	1.05e-08	2.63e-07
ENSGALG00000013900_MAP7	1829.01	-1.66922	0.291683	-5.72271	1.05e-08	2.63e-07
ENSGALG00000005420_AATF	229.237	-2.06149	0.360412	-5.71981	1.07e-08	2.67e-07
ENSGALG00000024480_TIMMDC1	729.551	-1.72858	0.302479	-5.71472	1.1e-08	2.75e-07
ENSGALG00000002426_EXOSC3	135.349	-2.38804	0.418054	-5.71228	1.11e-08	2.79e-07
ENSGALG00000013604_VIP	133.363	2.6072	0.456489	5.71142	1.12e-08	2.8e-07
ENSGALG00000008586_TUBB4B	4981.69	-1.71413	0.300265	-5.70871	1.14e-08	2.84e-07
ENSGALG00000054038	30.1094	-4.95667	0.869225	-5.7024	1.18e-08	2.94e-07
ENSGALG00000035254	616.99	-1.912	0.335547	-5.69817	1.21e-08	3.01e-07
ENSGALG00000035080_HARS	538.019	-1.78144	0.313	-5.69148	1.26e-08	3.12e-07
ENSGALG00000006294_PSMD2	1385.02	-1.77272	0.311535	-5.69025	1.27e-08	3.14e-07
ENSGALG00000001024_TPRG1L	2112.53	1.69734	0.298356	5.68897	1.28e-08	3.16e-07
ENSGALG00000005352_GATA5	2790.48	-2.34651	0.412741	-5.6852	1.31e-08	3.22e-07
ENSGALG00000009172_OSBPL6	746.951	-1.7931	0.315512	-5.68313	1.32e-08	3.26e-07
ENSGALG00000045165_C1orf109	49.1301	-3.26082	0.573916	-5.68171	1.33e-08	3.28e-07
ENSGALG00000000538_RNF113B	200.06	-2.36642	0.41661	-5.68017	1.35e-08	3.3e-07
ENSGALG00000017122_SGCG	357.11	2.00432	0.353087	5.67656	1.37e-08	3.37e-07
ENSGALG00000052748_U2AF2	1104.17	-1.67576	0.295331	-5.67418	1.39e-08	3.41e-07
ENSGALG00000025937_FXYD6	723.288	1.81774	0.320423	5.67295	1.4e-08	3.43e-07
ENSGALG00000016293_BMP5	261.83	2.01742	0.3558	5.67008	1.43e-08	3.48e-07
ENSGALG00000001624_CWC25	265.34	-1.9777	0.349115	-5.6649	1.47e-08	3.58e-07
ENSGALG00000007216_TVP23A	80.0382	3.10754	0.548724	5.66321	1.49e-08	3.61e-07
ENSGALG00000047182_ACHE	332.667	-2.78298	0.491557	-5.66156	1.5e-08	3.64e-07
ENSGALG00000004763_ALDH3A2	4881.27	-1.86643	0.329805	-5.65919	1.52e-08	3.69e-07
ENSGALG00000019961_SLC18B1	461.573	-1.79966	0.318158	-5.6565	1.54e-08	3.74e-07
ENSGALG00000031408_SORD	3733.33	-2.01486	0.356295	-5.65504	1.56e-08	3.76e-07
ENSGALG00000043736	240.039	-2.59331	0.459101	-5.64867	1.62e-08	3.9e-07
ENSGALG00000050659	30.8731	-8.94021	1.58382	-5.64471	1.65e-08	3.98e-07
ENSGALG00000047953	84.9521	-2.64468	0.469345	-5.63483	1.75e-08	4.21e-07
ENSGALG00000030776_METTL7A	101.607	2.71359	0.481824	5.63191	1.78e-08	4.28e-07
ENSGALG00000006217_S100B	63.228	4.08316	0.725166	5.63065	1.8e-08	4.3e-07
ENSGALG00000049356	449.471	1.88587	0.335071	5.62826	1.82e-08	4.36e-07
ENSGALG00000030548_OSBP	1407.36	-1.75366	0.31203	-5.62017	1.91e-08	4.56e-07
ENSGALG00000034575_MRI1	335.9	-2.03053	0.36156	-5.61601	1.95e-08	4.66e-07
ENSGALG00000026443_RNF44	47.8715	-3.62152	0.645447	-5.61087	2.01e-08	4.79e-07
ENSGALG00000035619_MTTP	10655.8	-1.72194	0.30689	-5.61094	2.01e-08	4.79e-07
ENSGALG00000047352	523.313	-1.79614	0.320485	-5.60444	2.09e-08	4.96e-07
ENSGALG00000049360_PPP1R10	511.468	-2.53066	0.452177	-5.59661	2.19e-08	5.18e-07
ENSGALG00000037020_SCT	1038.55	-2.11363	0.377827	-5.59419	2.22e-08	5.25e-07
ENSGALG00000010432_GSTZ1	253.594	-2.21062	0.395364	-5.59134	2.25e-08	5.32e-07
ENSGALG00000050803_GIPC1	329.961	-2.41941	0.432803	-5.5901	2.27e-08	5.35e-07
ENSGALG00000014899_NUS1	570.526	-1.75876	0.314694	-5.58877	2.29e-08	5.39e-07
ENSGALG00000051697	28.4961	-6.31118	1.12982	-5.58599	2.32e-08	5.47e-07
ENSGALG00000015844_SOD1	1249.32	-1.64292	0.294132	-5.58566	2.33e-08	5.47e-07
ENSGALG00000031260	60.651	-3.08765	0.553086	-5.58259	2.37e-08	5.56e-07
ENSGALG00000012106_SCTR	131.335	2.55163	0.457121	5.58196	2.38e-08	5.57e-07
ENSGALG00000045584	1215.1	1.66279	0.297931	5.58111	2.39e-08	5.59e-07
ENSGALG00000005181	2995.82	-1.78206	0.319393	-5.5795	2.41e-08	5.63e-07
ENSGALG00000029343_TGM2	1562.25	1.74134	0.312313	5.57563	2.47e-08	5.75e-07
ENSGALG00000011594_NR1H4	584.727	1.89876	0.340692	5.57325	2.5e-08	5.82e-07
ENSGALG00000018815_PCGF2	245.163	-2.42853	0.435934	-5.57087	2.53e-08	5.89e-07
ENSGALG00000015937_FABP1	14000.5	-2.11975	0.380544	-5.57033	2.54e-08	5.9e-07
ENSGALG00000004604	205.507	-2.03782	0.365888	-5.56951	2.55e-08	5.92e-07
ENSGALG00000013535_CYP4V2	5206.3	-2.08959	0.375311	-5.56763	2.58e-08	5.96e-07
ENSGALG00000026311_C12orf75	113.155	2.66128	0.477972	5.56786	2.58e-08	5.96e-07
ENSGALG00000048775_TXLNA	784.286	-1.7597	0.316224	-5.56471	2.63e-08	6.05e-07
ENSGALG00000004424_SEC16B	433.516	-1.93427	0.347771	-5.56193	2.67e-08	6.14e-07
ENSGALG00000035946_GUCY1A1	404.45	1.9853	0.357015	5.56085	2.68e-08	6.17e-07
ENSGALG00000036282_PRKAG1	327.09	-1.91628	0.344876	-5.55644	2.75e-08	6.32e-07
ENSGALG00000048205	347.116	-2.23119	0.401598	-5.55578	2.76e-08	6.33e-07
ENSGALG00000000883_MAPKAPK2	764.836	-2.5296	0.455353	-5.55525	2.77e-08	6.34e-07
ENSGALG00000044985	1654.61	-2.01952	0.363623	-5.55387	2.79e-08	6.38e-07
ENSGALG00000029360	1468.25	-1.68745	0.303888	-5.55286	2.81e-08	6.41e-07
ENSGALG00000005416_TTC39B	777.638	-1.89527	0.34133	-5.5526	2.81e-08	6.41e-07
ENSGALG00000034345	205.885	-2.1324	0.384222	-5.54991	2.86e-08	6.5e-07
ENSGALG00000011692_CDCA4	802.827	1.67835	0.302441	5.54933	2.87e-08	6.51e-07
ENSGALG00000001117_PFKFB2	546.544	1.75967	0.317296	5.54584	2.93e-08	6.63e-07
ENSGALG00000016813_CHAMP1	974.782	-1.81481	0.327304	-5.54473	2.94e-08	6.67e-07
ENSGALG00000009328_EIF3A	4808.05	-1.7662	0.318619	-5.54331	2.97e-08	6.71e-07
ENSGALG00000008506_MRPS25	257.187	-1.97562	0.35648	-5.54203	2.99e-08	6.75e-07
ENSGALG00000030599_TYK2	423.858	-2.09474	0.378015	-5.54141	3e-08	6.76e-07
ENSGALG00000006038_TGFBR3	1316.32	1.65075	0.297943	5.5405	3.02e-08	6.79e-07
ENSGALG00000011551_JCHAIN	7451.67	-2.06631	0.373008	-5.53958	3.03e-08	6.82e-07
ENSGALG00000025748_FGF9	203.935	-2.13019	0.384665	-5.53778	3.06e-08	6.88e-07
ENSGALG00000026631_HOXA10	115.565	8.18962	1.48072	5.53084	3.19e-08	7.14e-07
ENSGALG00000017167_SLC35F2	205.2	-2.01994	0.365258	-5.53017	3.2e-08	7.16e-07
ENSGALG00000003537_SGK2	55.4737	3.52633	0.639078	5.51784	3.43e-08	7.67e-07
ENSGALG00000017318_PAAF1	108.3	-2.6251	0.476035	-5.51451	3.5e-08	7.8e-07
ENSGALG00000000814_HNRNPR	2780.87	-1.57839	0.286419	-5.51078	3.57e-08	7.96e-07
ENSGALG00000031493_BAK1	967.293	-1.77704	0.322849	-5.50425	3.71e-08	8.25e-07
ENSGALG00000035623_LIMD1	546.763	1.85741	0.337489	5.5036	3.72e-08	8.27e-07
ENSGALG00000039624_PSMA5	583.031	-1.71471	0.31186	-5.49834	3.83e-08	8.51e-07
ENSGALG00000046885_SCO2	281.203	-1.93514	0.352045	-5.49685	3.87e-08	8.56e-07
ENSGALG00000027234_HOXA13	60.2031	6.23462	1.13429	5.49652	3.87e-08	8.57e-07
ENSGALG00000046811_STIP1	517.027	-2.11957	0.385689	-5.49553	3.9e-08	8.6e-07
ENSGALG00000031860	208.276	-1.95606	0.35603	-5.49408	3.93e-08	8.66e-07
ENSGALG00000038102_TBRG4	333.003	-1.82944	0.333039	-5.49318	3.95e-08	8.69e-07
ENSGALG00000039869_PYURF	44.119	-3.42163	0.623012	-5.49208	3.97e-08	8.74e-07
ENSGALG00000007047_GAL	347.759	1.9477	0.354921	5.48771	4.07e-08	8.93e-07
ENSGALG00000010433	1201.42	-1.71726	0.312925	-5.48776	4.07e-08	8.93e-07
ENSGALG00000010975_TMTC2	502.934	1.74165	0.317584	5.48406	4.16e-08	9.1e-07
ENSGALG00000000737_SMPDL3B	288.354	-2.28145	0.416486	-5.47785	4.31e-08	9.4e-07
ENSGALG00000012595_AGTPBP1	388.097	1.9917	0.363589	5.47788	4.3e-08	9.4e-07
ENSGALG00000047514	42.9212	-3.66504	0.669343	-5.47559	4.36e-08	9.51e-07
ENSGALG00000039160_SUPT5H	1003.98	-1.84701	0.337626	-5.47056	4.49e-08	9.77e-07
ENSGALG00000017191_ANGPTL5	97.8528	2.64107	0.483022	5.4678	4.56e-08	9.9e-07
ENSGALG00000027891_NREP	1767.92	1.83007	0.334704	5.46774	4.56e-08	9.9e-07
ENSGALG00000050921	73.0662	-2.78459	0.509595	-5.46433	4.65e-08	1.01e-06
ENSGALG00000041826_S100A6	1788.26	1.79533	0.328703	5.46188	4.71e-08	1.02e-06
ENSGALG00000045362	42.8552	5.02465	0.920332	5.45961	4.77e-08	1.03e-06
ENSGALG00000054599	795.755	-1.63403	0.299295	-5.45962	4.77e-08	1.03e-06
ENSGALG00000054176	33.5985	-3.83125	0.703296	-5.44757	5.11e-08	1.1e-06
ENSGALG00000046169_PYM1	167.315	-2.16864	0.398787	-5.43809	5.39e-08	1.16e-06
ENSGALG00000006755_USP2	30.514	-4.76051	0.876578	-5.43078	5.61e-08	1.21e-06
ENSGALG00000034100_UACA	2453.98	-1.60426	0.295488	-5.42919	5.66e-08	1.22e-06
ENSGALG00000037286_VIL1	9101.27	-1.66779	0.307268	-5.4278	5.71e-08	1.22e-06
ENSGALG00000004042_NUFIP2	293.07	-1.92603	0.354988	-5.42563	5.78e-08	1.23e-06
ENSGALG00000013723_OASL	973.869	-2.38588	0.439734	-5.42573	5.77e-08	1.23e-06
ENSGALG00000017320_RAB6A	487.233	-1.74996	0.32255	-5.4254	5.78e-08	1.23e-06
ENSGALG00000030857_USP48	1105.56	-1.85494	0.341872	-5.42583	5.77e-08	1.23e-06
ENSGALG00000011671_SLC15A2	57.0186	6.14486	1.13306	5.42322	5.85e-08	1.25e-06
ENSGALG00000039335_SLC25A22	1187.64	-1.59414	0.293964	-5.42291	5.86e-08	1.25e-06
ENSGALG00000050943_RNF19B	117.643	-2.54653	0.469619	-5.42256	5.88e-08	1.25e-06
ENSGALG00000033441_COX14	236.294	2.27232	0.419178	5.42088	5.93e-08	1.26e-06
ENSGALG00000021238	83.8886	2.78287	0.513523	5.41917	5.99e-08	1.27e-06
ENSGALG00000047145_SMARCA4	607.831	-2.24124	0.413718	-5.41732	6.05e-08	1.28e-06
ENSGALG00000032993_FTSJ3	414.482	-1.94117	0.358344	-5.41705	6.06e-08	1.28e-06
ENSGALG00000016142_MX1	442.095	-1.88669	0.348444	-5.41463	6.14e-08	1.29e-06
ENSGALG00000037629_TRANK1	3467.02	-1.9124	0.353177	-5.41486	6.13e-08	1.29e-06
ENSGALG00000032219_FUS	820.67	-1.78295	0.329687	-5.40801	6.37e-08	1.34e-06
ENSGALG00000012586_GKAP1	367.549	-1.7631	0.326104	-5.40656	6.42e-08	1.35e-06
ENSGALG00000051461	29.5417	-6.53797	1.20945	-5.40572	6.45e-08	1.35e-06
ENSGALG00000040260	2921.83	-1.89116	0.350103	-5.40171	6.6e-08	1.38e-06
ENSGALG00000048034	1319.16	-1.63132	0.302037	-5.40108	6.62e-08	1.38e-06
ENSGALG00000015483_PNISR	1454.65	-1.67415	0.309988	-5.40069	6.64e-08	1.39e-06
ENSGALG00000004057_HMGCL	638.163	-1.78514	0.330764	-5.39702	6.78e-08	1.41e-06
ENSGALG00000005105_TPR	3854.13	-1.84191	0.341349	-5.39598	6.82e-08	1.42e-06
ENSGALG00000040335_CEBPZ	767.034	-1.78701	0.331201	-5.39556	6.83e-08	1.42e-06
ENSGALG00000009737_TAC1	119.202	2.43481	0.451768	5.38951	7.06e-08	1.47e-06
ENSGALG00000017205_ENDOD1	116.775	2.4006	0.445506	5.38848	7.11e-08	1.47e-06
ENSGALG00000028308_TNS4	197.182	-2.3587	0.437848	-5.38703	7.16e-08	1.48e-06
ENSGALG00000017299_RPS11	5234.03	1.62616	0.301945	5.38562	7.22e-08	1.49e-06
ENSGALG00000050267_CALU	305.896	-1.93278	0.358946	-5.3846	7.26e-08	1.5e-06
ENSGALG00000003238_GNA11	1842.7	-1.73872	0.322948	-5.38391	7.29e-08	1.5e-06
ENSGALG00000007767_DIS3L2	574.782	-1.76798	0.328701	-5.37868	7.5e-08	1.55e-06
ENSGALG00000041911_AAK1	382.028	-1.91533	0.356251	-5.37636	7.6e-08	1.56e-06
ENSGALG00000037014_TSNARE1	259.362	1.98482	0.369196	5.37607	7.61e-08	1.56e-06
ENSGALG00000036635	25.3101	-4.98179	0.928963	-5.36275	8.2e-08	1.68e-06
ENSGALG00000035960	176.617	-2.3391	0.436202	-5.36243	8.21e-08	1.68e-06
ENSGALG00000001022_CCDC43	226.396	-1.91974	0.358101	-5.36089	8.28e-08	1.69e-06
ENSGALG00000008349_LMCD1	188.256	-1.98734	0.370919	-5.35789	8.42e-08	1.72e-06
ENSGALG00000014948_HMGCR	2291.41	-1.75913	0.328529	-5.35456	8.58e-08	1.75e-06
ENSGALG00000051654_YLPM1	1431.44	-1.78801	0.334157	-5.35079	8.76e-08	1.78e-06
ENSGALG00000052284_H2A-VI	993.494	1.70637	0.31955	5.3399	9.3e-08	1.89e-06
ENSGALG00000012833_VPS33B	536.963	-1.68214	0.315222	-5.33637	9.48e-08	1.93e-06
ENSGALG00000011414_AMDHD1	49.7582	-3.13052	0.586702	-5.33579	9.51e-08	1.93e-06
ENSGALG00000004519_TRPV2	1048.91	1.69929	0.318505	5.3352	9.54e-08	1.93e-06
ENSGALG00000035914	26198.7	-2.34726	0.440136	-5.33302	9.66e-08	1.95e-06
ENSGALG00000041898_FAM43A	164.139	2.23005	0.418209	5.33239	9.69e-08	1.96e-06
ENSGALG00000000720	1425.18	-1.86147	0.349163	-5.33123	9.75e-08	1.97e-06
ENSGALG00000043118_ATP10A	1741.21	-1.76317	0.330741	-5.33097	9.77e-08	1.97e-06
ENSGALG00000033781_FEN1	214.412	-2.24249	0.422401	-5.30893	1.1e-07	2.22e-06
ENSGALG00000008096_SUFU	471.084	-2.01801	0.380379	-5.30525	1.13e-07	2.26e-06
ENSGALG00000042895_BCAR1	838.359	-2.16504	0.408229	-5.30349	1.14e-07	2.28e-06
ENSGALG00000005622_ARF4	1703.07	-1.62256	0.305965	-5.30309	1.14e-07	2.28e-06
ENSGALG00000008094_HSPD1	4686.96	-1.88207	0.354987	-5.3018	1.15e-07	2.3e-06
ENSGALG00000017384_ERH	797.51	-1.65323	0.312012	-5.29859	1.17e-07	2.33e-06
ENSGALG00000001986_VCP	2914.7	-1.8838	0.35585	-5.29379	1.2e-07	2.39e-06
ENSGALG00000035913_PPP1R27	63.1958	3.64257	0.6882	5.29289	1.2e-07	2.4e-06
ENSGALG00000052643_C15orf48	1601.02	1.67098	0.315894	5.28968	1.23e-07	2.44e-06
ENSGALG00000023806_PITPNA	1379.91	-1.71033	0.323441	-5.28794	1.24e-07	2.46e-06
ENSGALG00000015849_ME1	1162.14	-1.82495	0.345171	-5.28709	1.24e-07	2.47e-06
ENSGALG00000047347_Metazoa_SRP	98.5499	3.14406	0.594646	5.28728	1.24e-07	2.47e-06
ENSGALG00000002089	867.882	-1.58453	0.299854	-5.28435	1.26e-07	2.5e-06
ENSGALG00000011490_CMTM6	257.097	1.9485	0.36922	5.27734	1.31e-07	2.59e-06
ENSGALG00000030781_CA2	1346.87	-1.95163	0.369864	-5.2766	1.32e-07	2.6e-06
ENSGALG00000034352_MRPL43	560.922	-1.87134	0.355407	-5.26533	1.4e-07	2.76e-06
ENSGALG00000029702	474.068	-1.65476	0.314621	-5.25954	1.44e-07	2.85e-06
ENSGALG00000016617_NCOA1	919.431	-2.216	0.42172	-5.25467	1.48e-07	2.92e-06
ENSGALG00000005071_MPP1	3226.89	-1.57519	0.299802	-5.25409	1.49e-07	2.92e-06
ENSGALG00000002906_TARDBP	1251.34	-1.80459	0.343533	-5.25304	1.5e-07	2.94e-06
ENSGALG00000016431_PAX5	65.5838	4.38942	0.837384	5.24182	1.59e-07	3.12e-06
ENSGALG00000020151_NMU	92.4812	2.52792	0.483113	5.23257	1.67e-07	3.27e-06
ENSGALG00000051056	27.3847	-4.5413	0.868695	-5.22773	1.72e-07	3.36e-06
ENSGALG00000013639_SYF2	478.363	-1.77562	0.339738	-5.22644	1.73e-07	3.38e-06
ENSGALG00000000887_NR0B2	698.926	-2.0739	0.396982	-5.22416	1.75e-07	3.41e-06
ENSGALG00000009759_SLC16A7	302.852	2.29305	0.439009	5.22325	1.76e-07	3.43e-06
ENSGALG00000001428_EFHD1	1208.46	-1.70849	0.327131	-5.22264	1.76e-07	3.43e-06
ENSGALG00000047536	74.9148	-2.54145	0.486948	-5.21913	1.8e-07	3.49e-06
ENSGALG00000047196	37.2517	-3.35914	0.643655	-5.21886	1.8e-07	3.49e-06
ENSGALG00000032858_RSL24D1	474.419	-1.7403	0.333773	-5.21401	1.85e-07	3.58e-06
ENSGALG00000050119_LAMTOR1	88.2101	-2.49702	0.478929	-5.21376	1.85e-07	3.58e-06
ENSGALG00000015086_OSBPL1A	1720.84	-1.77605	0.340952	-5.20909	1.9e-07	3.67e-06
ENSGALG00000016844_RAB20	143.687	-2.13717	0.410322	-5.20851	1.9e-07	3.68e-06
ENSGALG00000016775_RPL31	4033.17	1.57727	0.302847	5.20813	1.91e-07	3.68e-06
ENSGALG00000033446_COX5B	515.446	-1.63852	0.314644	-5.20752	1.91e-07	3.69e-06
ENSGALG00000020253	143.042	-2.04952	0.393621	-5.20682	1.92e-07	3.7e-06
ENSGALG00000012418_KYNU	221.262	-1.88903	0.362871	-5.20578	1.93e-07	3.71e-06
ENSGALG00000001618_OGFOD3	182.869	-1.97587	0.379607	-5.20503	1.94e-07	3.72e-06
ENSGALG00000016003_DDRGK1	383.532	-1.68459	0.323698	-5.20422	1.95e-07	3.73e-06
ENSGALG00000030097_RCC1	153.033	-2.01319	0.386898	-5.20342	1.96e-07	3.75e-06
ENSGALG00000016062_PSMG1	226.299	1.88597	0.362469	5.20311	1.96e-07	3.75e-06
ENSGALG00000035869_ATAD3A	307.075	-2.03347	0.391132	-5.19893	2e-07	3.83e-06
ENSGALG00000052012	82.5666	-2.43816	0.469142	-5.19705	2.02e-07	3.86e-06
ENSGALG00000050318	25.5357	-5.43829	1.0465	-5.19666	2.03e-07	3.86e-06
ENSGALG00000007378_FAM162A	170.554	-1.99279	0.38352	-5.19604	2.04e-07	3.87e-06
ENSGALG00000050253	27.8272	-4.05349	0.780088	-5.1962	2.03e-07	3.87e-06
ENSGALG00000001369	5580	-1.58602	0.305275	-5.19536	2.04e-07	3.88e-06
ENSGALG00000015240	704.962	-1.64715	0.317082	-5.1947	2.05e-07	3.89e-06
ENSGALG00000047339	22.3588	-8.35962	1.60981	-5.19292	2.07e-07	3.92e-06
ENSGALG00000046965_NNF1	423.633	-1.91582	0.369038	-5.19138	2.09e-07	3.95e-06
ENSGALG00000049229	203.907	-1.96643	0.378804	-5.19116	2.09e-07	3.95e-06
ENSGALG00000033017_C2orf88	109.762	2.36364	0.455343	5.19091	2.09e-07	3.95e-06
ENSGALG00000052579	39.4206	8.09684	1.56107	5.18674	2.14e-07	4.03e-06
ENSGALG00000035138_UBL5	581.241	-1.7755	0.342356	-5.18613	2.15e-07	4.04e-06
ENSGALG00000043336_COPZ1	635.498	-1.69334	0.326727	-5.18274	2.19e-07	4.11e-06
ENSGALG00000028135	68.5641	2.89305	0.558361	5.18132	2.2e-07	4.13e-06
ENSGALG00000005643_LYVE1	680.476	1.65477	0.319448	5.18008	2.22e-07	4.16e-06
ENSGALG00000039205	119.197	-2.20889	0.426694	-5.17675	2.26e-07	4.23e-06
ENSGALG00000006564	884.181	-1.61892	0.313014	-5.17205	2.32e-07	4.33e-06
ENSGALG00000049437	34.6024	-3.57821	0.69254	-5.16679	2.38e-07	4.45e-06
ENSGALG00000051597	119.748	-2.28531	0.442439	-5.16524	2.4e-07	4.48e-06
ENSGALG00000009752_C1GALT1	987.621	1.95953	0.379556	5.16269	2.43e-07	4.53e-06
ENSGALG00000040594_GNPDA1	1599.84	-1.48654	0.288318	-5.1559	2.52e-07	4.7e-06
ENSGALG00000012876_SSBP1	436.056	-1.66986	0.32463	-5.1439	2.69e-07	5e-06
ENSGALG00000033338_GPT2	2760.62	-2.00969	0.390936	-5.14071	2.74e-07	5.08e-06
ENSGALG00000038730_GIGYF2	1613.13	-1.54321	0.30091	-5.12849	2.92e-07	5.41e-06
ENSGALG00000000251_CD79B	82.3242	2.73961	0.534307	5.1274	2.94e-07	5.44e-06
ENSGALG00000006682_BEND7	1422.11	-1.64385	0.32061	-5.12724	2.94e-07	5.44e-06
ENSGALG00000049493	82.6808	7.70962	1.50405	5.12591	2.96e-07	5.47e-06
ENSGALG00000054322	271.137	-1.7786	0.347225	-5.12233	3.02e-07	5.57e-06
ENSGALG00000037067_EIF3E	5609.36	1.54188	0.30106	5.12148	3.03e-07	5.59e-06
ENSGALG00000002232_RERE	707.211	-2.02738	0.39609	-5.11849	3.08e-07	5.66e-06
ENSGALG00000015492_PDZK1	4667.2	-1.84836	0.361121	-5.11841	3.08e-07	5.66e-06
ENSGALG00000010909_PRKG2	364.034	2.6441	0.517191	5.11243	3.18e-07	5.84e-06
ENSGALG00000007519_ACBD5	1928.92	-1.61392	0.316074	-5.10615	3.29e-07	6.03e-06
ENSGALG00000000603_KANSL1	877.327	-2.00511	0.39288	-5.10362	3.33e-07	6.09e-06
ENSGALG00000033932_BF1	5934.9	-1.83972	0.360467	-5.10372	3.33e-07	6.09e-06
ENSGALG00000006757_XYLT1	497.874	-1.87553	0.367727	-5.10033	3.39e-07	6.19e-06
ENSGALG00000034548_PLEKHA1	1869.7	-1.5069	0.29558	-5.09812	3.43e-07	6.26e-06
ENSGALG00000005487_CCDC12	385.652	-1.64096	0.321896	-5.09778	3.44e-07	6.26e-06
ENSGALG00000033150_MIDN	242.226	-1.90121	0.373026	-5.09672	3.46e-07	6.29e-06
ENSGALG00000041939_FAM222B	110.646	-2.69018	0.528081	-5.09426	3.5e-07	6.37e-06
ENSGALG00000001096_UQCR11	591.836	-1.7914	0.352641	-5.07997	3.78e-07	6.86e-06
ENSGALG00000036043_TBX3	913.973	-2.05767	0.405138	-5.07892	3.8e-07	6.88e-06
ENSGALG00000054036	89.5201	-10.5926	2.08587	-5.07829	3.81e-07	6.9e-06
ENSGALG00000036856_CBX5	61.4413	-2.95768	0.582501	-5.07755	3.82e-07	6.92e-06
ENSGALG00000054294	98.312	-2.54239	0.500758	-5.07708	3.83e-07	6.93e-06
ENSGALG00000038838_NSMAF	275.701	1.76825	0.348311	5.07663	3.84e-07	6.94e-06
ENSGALG00000004627	296.39	-1.96548	0.387192	-5.07624	3.85e-07	6.94e-06
ENSGALG00000039334	157.397	-2.16966	0.427584	-5.07424	3.89e-07	7.01e-06
ENSGALG00000050829	40.3938	-4.50191	0.887805	-5.07084	3.96e-07	7.12e-06
ENSGALG00000029819_SCG2	742.088	-1.53331	0.302612	-5.0669	4.04e-07	7.26e-06
ENSGALG00000000787_DHX38	1036.86	-1.72498	0.340982	-5.05885	4.22e-07	7.57e-06
ENSGALG00000012052_SNX4	1048.14	-1.5654	0.309578	-5.05656	4.27e-07	7.65e-06
ENSGALG00000037619_HOXB6	37.5777	-3.2143	0.63589	-5.0548	4.31e-07	7.71e-06
ENSGALG00000027184_OLFML1	293.218	1.85638	0.367434	5.05227	4.37e-07	7.81e-06
ENSGALG00000004831_RPS4Y1	8875.39	1.47651	0.292418	5.0493	4.43e-07	7.92e-06
ENSGALG00000038278_TRIM7.2	210.58	-1.99706	0.395848	-5.04503	4.53e-07	8.09e-06
ENSGALG00000031013_DHDH	167.629	-1.96066	0.388693	-5.04424	4.55e-07	8.11e-06
ENSGALG00000015751_ATP5PF	718.171	1.6991	0.336878	5.04366	4.57e-07	8.13e-06
ENSGALG00000015366	914.424	-1.65164	0.327502	-5.04313	4.58e-07	8.14e-06
ENSGALG00000031069	144.644	-1.95759	0.388228	-5.04236	4.6e-07	8.17e-06
ENSGALG00000027476_PLEKHG5	407.437	-1.60786	0.319047	-5.03959	4.67e-07	8.27e-06
ENSGALG00000040021_HOXA11	33.8957	7.86497	1.56066	5.03953	4.67e-07	8.27e-06
ENSGALG00000000067_SPR	351.765	-1.74431	0.346534	-5.03361	4.81e-07	8.52e-06
ENSGALG00000012709_ATXN1	325.953	-1.97116	0.391679	-5.03259	4.84e-07	8.55e-06
ENSGALG00000046656_PMVK	120.648	-2.18645	0.434536	-5.03169	4.86e-07	8.58e-06
ENSGALG00000040702_BCKDHB	243.571	1.93305	0.38436	5.02927	4.92e-07	8.68e-06
ENSGALG00000025907_ZBTB7A	420.961	-1.62104	0.32241	-5.02789	4.96e-07	8.73e-06
ENSGALG00000004523_MFN2	977.533	-1.65888	0.330002	-5.02688	4.99e-07	8.77e-06
ENSGALG00000004777_AIFM2	208.535	-1.8049	0.359175	-5.02513	5.03e-07	8.83e-06
ENSGALG00000007840	1250.64	-1.8388	0.365921	-5.02512	5.03e-07	8.83e-06
ENSGALG00000011950_ACO2	3746.5	-1.45734	0.290051	-5.02441	5.05e-07	8.85e-06
ENSGALG00000013408_TMF1	2132.48	-1.46227	0.291038	-5.0243	5.05e-07	8.85e-06
ENSGALG00000010166_VLDLR	574.342	1.67679	0.333794	5.02342	5.08e-07	8.88e-06
ENSGALG00000033894_MEA1	1069.55	1.69541	0.337525	5.02306	5.09e-07	8.89e-06
ENSGALG00000034813	19.6481	-8.40002	1.67266	-5.02196	5.11e-07	8.92e-06
ENSGALG00000046850	85.0386	-10.5185	2.09456	-5.02183	5.12e-07	8.92e-06
ENSGALG00000013632_ACOT13	341.032	-1.82011	0.362555	-5.02025	5.16e-07	8.99e-06
ENSGALG00000007625_FADD	750.4	-1.6767	0.334097	-5.01861	5.2e-07	9.05e-06
ENSGALG00000008890_ADGRL4	299.768	1.76466	0.351995	5.0133	5.35e-07	9.28e-06
ENSGALG00000016547_TXLNG	324.524	-1.70227	0.339541	-5.01345	5.35e-07	9.28e-06
ENSGALG00000006404_DDX46	1801.56	-1.46558	0.292459	-5.01124	5.41e-07	9.37e-06
ENSGALG00000045705	189.478	-2.023	0.403724	-5.01084	5.42e-07	9.38e-06
ENSGALG00000033926_CBX1	322.071	-1.65114	0.329552	-5.01026	5.44e-07	9.4e-06
ENSGALG00000016342_MYOM2	76.9636	-2.45872	0.491047	-5.00709	5.53e-07	9.55e-06
ENSGALG00000001857_C1QTNF12	692.664	1.57811	0.315251	5.00589	5.56e-07	9.59e-06
ENSGALG00000048104	74.7869	-2.68438	0.536281	-5.00554	5.57e-07	9.6e-06
ENSGALG00000042641_PATL1	245.046	-2.04277	0.40831	-5.00298	5.65e-07	9.72e-06
ENSGALG00000014992_TMEM128	417.457	1.62702	0.325886	4.99261	5.96e-07	1.02e-05
ENSGALG00000000835_PLEKHJ1	1128.72	-1.48236	0.296996	-4.99118	6e-07	1.03e-05
ENSGALG00000009640_CHRM5	23.5928	-4.59682	0.921038	-4.99091	6.01e-07	1.03e-05
ENSGALG00000010255_NASP	356.3	-1.64937	0.330485	-4.99077	6.01e-07	1.03e-05
ENSGALG00000011271_LUM	2168.05	1.85646	0.371985	4.99067	6.02e-07	1.03e-05
ENSGALG00000034434_IDH2	1191.94	-1.61046	0.322659	-4.99122	6e-07	1.03e-05
ENSGALG00000006880_SLC38A10	3347.61	-1.67528	0.335863	-4.98798	6.1e-07	1.04e-05
ENSGALG00000014681_PCSK1	621.093	-1.61273	0.323314	-4.98813	6.1e-07	1.04e-05
ENSGALG00000005850_FNBP1L	2061.85	-1.46961	0.294719	-4.98649	6.15e-07	1.05e-05
ENSGALG00000005194_CD72	50.3457	3.68696	0.739875	4.98322	6.25e-07	1.06e-05
ENSGALG00000045127	57.6523	-2.7473	0.551303	-4.98328	6.25e-07	1.06e-05
ENSGALG00000016451_ROCK2	2507.28	-1.43669	0.288488	-4.98007	6.36e-07	1.08e-05
ENSGALG00000014847_MYOM1	151.878	-1.92858	0.387558	-4.97623	6.48e-07	1.1e-05
ENSGALG00000003906_MPHOSPH10	385.893	-1.68051	0.337727	-4.97594	6.49e-07	1.1e-05
ENSGALG00000046927	58.6844	3.04982	0.613402	4.97198	6.63e-07	1.12e-05
ENSGALG00000010763_TRIP11	2899.28	-1.47012	0.295747	-4.97087	6.67e-07	1.13e-05
ENSGALG00000039775_SHC1	562.238	-1.68588	0.339272	-4.9691	6.73e-07	1.14e-05
ENSGALG00000005944_ZNF639	200.256	1.84851	0.372065	4.96825	6.76e-07	1.14e-05
ENSGALG00000011705_BRF1	259.334	-1.75023	0.352384	-4.96681	6.81e-07	1.15e-05
ENSGALG00000042011_HNRNPA1	2859.11	-1.62408	0.326976	-4.96698	6.8e-07	1.15e-05
ENSGALG00000031978_TARP	1217.49	1.47078	0.296141	4.96647	6.82e-07	1.15e-05
ENSGALG00000012246_R3HDM1	1576.47	-1.48356	0.298937	-4.96278	6.95e-07	1.17e-05
ENSGALG00000002644_RPL10A	5254.17	1.58277	0.318952	4.96242	6.96e-07	1.17e-05
ENSGALG00000011206_KITLG	272.864	1.94713	0.392615	4.95939	7.07e-07	1.19e-05
ENSGALG00000014876_TBC1D32	184.3	1.9017	0.383564	4.95796	7.12e-07	1.19e-05
ENSGALG00000007284_SYP	56.1264	3.06772	0.619035	4.95565	7.21e-07	1.21e-05
ENSGALG00000002925_ETFA	1592.18	-1.5177	0.306322	-4.95457	7.25e-07	1.21e-05
ENSGALG00000017358_YWHAG	1847.93	-1.5808	0.319103	-4.9539	7.27e-07	1.21e-05
ENSGALG00000013803_ADGRG6	2496.1	-1.5363	0.310216	-4.95237	7.33e-07	1.22e-05
ENSGALG00000017362_HAVCR1	403.531	1.64013	0.331186	4.95228	7.33e-07	1.22e-05
ENSGALG00000041494_GOLGB1	5060.68	-1.49044	0.301257	-4.94741	7.52e-07	1.25e-05
ENSGALG00000006350_DDTL	1530.48	-1.58082	0.319636	-4.94569	7.59e-07	1.26e-05
ENSGALG00000047269_TMEM135	1194.04	-1.45808	0.294826	-4.94556	7.59e-07	1.26e-05
ENSGALG00000041790_SAMD4A	325.195	-1.85797	0.375736	-4.94488	7.62e-07	1.26e-05
ENSGALG00000010882_G3BP2	613.07	-1.6314	0.330287	-4.93933	7.84e-07	1.3e-05
ENSGALG00000005948_RPL27A	7020.16	1.50904	0.30563	4.93748	7.91e-07	1.31e-05
ENSGALG00000014944_GCNT4	149.058	2.09003	0.42335	4.93688	7.94e-07	1.31e-05
ENSGALG00000040910_COA7	347.77	-1.62358	0.329004	-4.93483	8.02e-07	1.32e-05
ENSGALG00000000533_SRSF3	882.187	-1.84234	0.373448	-4.93334	8.08e-07	1.33e-05
ENSGALG00000039228_ZFP36L1	1172.49	-1.75935	0.356733	-4.93184	8.15e-07	1.34e-05
ENSGALG00000016251	120.066	2.25715	0.457878	4.92959	8.24e-07	1.36e-05
ENSGALG00000032598_MYO1A	8423.5	-1.67342	0.339487	-4.92924	8.25e-07	1.36e-05
ENSGALG00000035156_DCTN1	2131.78	-1.5642	0.317321	-4.92941	8.25e-07	1.36e-05
ENSGALG00000017246_ME3	165.53	2.04665	0.415295	4.92819	8.3e-07	1.36e-05
ENSGALG00000003625_NDUFS5	1216.64	-1.59559	0.323794	-4.92779	8.32e-07	1.36e-05
ENSGALG00000052038_MBLAC1	69.2303	-2.49353	0.506383	-4.92419	8.47e-07	1.39e-05
ENSGALG00000053204	29.652	-7.85049	1.59506	-4.92176	8.58e-07	1.4e-05
ENSGALG00000006530_TSSC4	304.395	-1.7573	0.357105	-4.92096	8.61e-07	1.41e-05
ENSGALG00000047167_DNAJC30	65.9104	2.69579	0.548099	4.91843	8.72e-07	1.42e-05
ENSGALG00000033512_CPEB4	499.205	-1.5353	0.312223	-4.91734	8.77e-07	1.43e-05
ENSGALG00000013575_IFI6	904.308	-2.33834	0.475664	-4.91596	8.83e-07	1.44e-05
ENSGALG00000030031_TTPA	53.9305	3.68129	0.749451	4.91198	9.02e-07	1.47e-05
ENSGALG00000035362	60.5569	-2.55867	0.521059	-4.91052	9.08e-07	1.48e-05
ENSGALG00000007700_CTTN	3388.46	-1.39074	0.283652	-4.90298	9.44e-07	1.53e-05
ENSGALG00000036837_PTGES3	771.48	-1.82176	0.371681	-4.90141	9.52e-07	1.54e-05
ENSGALG00000043906	618.852	-1.51694	0.309481	-4.90155	9.51e-07	1.54e-05
ENSGALG00000026298_SERTAD2	496.91	-1.8353	0.374577	-4.89967	9.6e-07	1.55e-05
ENSGALG00000003356_TM2D2	292.282	1.72619	0.352356	4.89899	9.63e-07	1.56e-05
ENSGALG00000053299_KCNC3	187.481	-1.88655	0.385179	-4.89786	9.69e-07	1.56e-05
ENSGALG00000045788_PSMB6	444.995	1.66151	0.339318	4.89661	9.75e-07	1.57e-05
ENSGALG00000042858_FAM8A1	441.342	-1.78824	0.365236	-4.89613	9.77e-07	1.57e-05
ENSGALG00000021679_SF3A2	202.124	-1.79355	0.366462	-4.89423	9.87e-07	1.59e-05
ENSGALG00000039061_PHPT1	135.536	-1.94972	0.398418	-4.89365	9.9e-07	1.59e-05
ENSGALG00000009429_RXFP1	198.849	1.95562	0.399722	4.89247	9.96e-07	1.6e-05
ENSGALG00000041977_RNF128	2411.96	-1.9811	0.404928	-4.89246	9.96e-07	1.6e-05
ENSGALG00000011708_MYLK	20553.3	1.79738	0.367637	4.88902	1.01e-06	1.62e-05
ENSGALG00000004002_LYPLA2	342.323	-1.63312	0.334244	-4.886	1.03e-06	1.64e-05
ENSGALG00000013809	1123.19	-1.51042	0.309122	-4.88615	1.03e-06	1.64e-05
ENSGALG00000044788_ZNF628	295.397	-2.06188	0.422064	-4.88524	1.03e-06	1.65e-05
ENSGALG00000014651_LYSMD3	773.5	-1.473	0.301712	-4.88215	1.05e-06	1.67e-05
ENSGALG00000050145_FIS1	62.179	-3.06392	0.627588	-4.88205	1.05e-06	1.67e-05
ENSGALG00000023818_HSPB9	484.805	2.5235	0.517127	4.87985	1.06e-06	1.69e-05
ENSGALG00000051271	27.6599	-3.75799	0.770253	-4.8789	1.07e-06	1.7e-05
ENSGALG00000011932_XRCC6	211.685	-1.82901	0.375277	-4.87376	1.09e-06	1.74e-05
ENSGALG00000032988_PCMT1L	515.598	1.54368	0.31678	4.87305	1.1e-06	1.74e-05
ENSGALG00000024056_CHST3	237.636	-1.77434	0.364268	-4.87097	1.11e-06	1.76e-05
ENSGALG00000001995_LIMS2	250.328	1.8601	0.381926	4.87032	1.11e-06	1.76e-05
ENSGALG00000040489	28.562	7.66461	1.57386	4.86995	1.12e-06	1.77e-05
ENSGALG00000014833_RPL37	3922.34	1.53009	0.314292	4.86837	1.13e-06	1.78e-05
ENSGALG00000000410_TLK2	460.484	-1.7098	0.351313	-4.86688	1.13e-06	1.79e-05
ENSGALG00000030899_ATXN7L3	263.318	-1.8084	0.371563	-4.86702	1.13e-06	1.79e-05
ENSGALG00000011106_GALNT2	990.735	-1.57405	0.323496	-4.86575	1.14e-06	1.8e-05
ENSGALG00000000843_DOT1L	1024.92	-1.60689	0.330335	-4.86443	1.15e-06	1.81e-05
ENSGALG00000048625	65.4954	-2.39871	0.49419	-4.85381	1.21e-06	1.9e-05
ENSGALG00000006001_PRPF6	1700.53	-1.6206	0.33398	-4.85238	1.22e-06	1.92e-05
ENSGALG00000017291_FAR2	900.931	1.5714	0.324019	4.84971	1.24e-06	1.94e-05
ENSGALG00000005337_SNX2	2654.82	-1.46023	0.301126	-4.84923	1.24e-06	1.94e-05
ENSGALG00000054952	112.459	-2.3409	0.482866	-4.84792	1.25e-06	1.95e-05
ENSGALG00000053964_GIMAP1-GIMAP5	196.577	-1.77659	0.36658	-4.84639	1.26e-06	1.97e-05
ENSGALG00000037733	511.246	-1.62883	0.336128	-4.84587	1.26e-06	1.97e-05
ENSGALG00000047947	122.068	-1.99668	0.412397	-4.84165	1.29e-06	2.01e-05
ENSGALG00000037867_MRPL53	196.647	1.84223	0.380585	4.84053	1.29e-06	2.02e-05
ENSGALG00000003976_BCORL1	381.508	-1.87297	0.387138	-4.838	1.31e-06	2.04e-05
ENSGALG00000002870_LEMD2	494.718	-1.62844	0.336687	-4.83667	1.32e-06	2.05e-05
ENSGALG00000027633_RASSF9	186.087	1.85048	0.382718	4.83511	1.33e-06	2.07e-05
ENSGALG00000011133_LIN54	341.669	-1.80108	0.372575	-4.83413	1.34e-06	2.08e-05
ENSGALG00000010043_RBKS	504.975	-1.65594	0.342582	-4.83371	1.34e-06	2.08e-05
ENSGALG00000030571	87.9841	-2.42511	0.501778	-4.83303	1.34e-06	2.08e-05
ENSGALG00000051206	185.658	-1.80248	0.373014	-4.83221	1.35e-06	2.09e-05
ENSGALG00000014971_SLC2A9	91.7072	-2.23987	0.463984	-4.82748	1.38e-06	2.14e-05
ENSGALG00000031212_MGAT2	370.801	-1.7945	0.371724	-4.8275	1.38e-06	2.14e-05
ENSGALG00000007615_RAB11A	4040.05	-1.47451	0.305688	-4.8236	1.41e-06	2.17e-05
ENSGALG00000046740	61.2626	-2.51888	0.52218	-4.82378	1.41e-06	2.17e-05
ENSGALG00000002911_MOXD1	184.7	1.89338	0.39266	4.82193	1.42e-06	2.19e-05
ENSGALG00000032922_GSTM2	4055.79	-1.62877	0.337936	-4.81976	1.44e-06	2.21e-05
ENSGALG00000052983	123.262	-2.27692	0.472848	-4.81533	1.47e-06	2.26e-05
ENSGALG00000016897_GPR180	467.535	-1.62346	0.337179	-4.81485	1.47e-06	2.26e-05
ENSGALG00000038753_SAR1B	1619.25	-1.45678	0.30261	-4.81404	1.48e-06	2.27e-05
ENSGALG00000021634_MAP7D1	55.3112	-2.84608	0.591323	-4.81307	1.49e-06	2.28e-05
ENSGALG00000023703_GIT1	505.534	-2.09802	0.435972	-4.81228	1.49e-06	2.28e-05
ENSGALG00000032570_LANCL2	219.723	1.88711	0.392164	4.81204	1.49e-06	2.28e-05
ENSGALG00000037675_COL14A1	102.245	2.24373	0.466268	4.81211	1.49e-06	2.28e-05
ENSGALG00000033671_FREM2	450.202	1.80557	0.375463	4.80892	1.52e-06	2.32e-05
ENSGALG00000038301_NIPSNAP1	414.927	-1.89797	0.394765	-4.80786	1.53e-06	2.33e-05
ENSGALG00000028996_SIGMAR1	262.871	-1.63954	0.341251	-4.80448	1.55e-06	2.36e-05
ENSGALG00000000544	269.604	-1.87121	0.389492	-4.80424	1.55e-06	2.36e-05
ENSGALG00000007766_KIAA1217	901.756	-2.01171	0.418861	-4.80282	1.56e-06	2.38e-05
ENSGALG00000049027	534.749	-1.67723	0.349245	-4.80244	1.57e-06	2.38e-05
ENSGALG00000027188_SREBF1	582.223	-1.74186	0.362824	-4.80084	1.58e-06	2.4e-05
ENSGALG00000034772	2892.6	-1.66448	0.346823	-4.79923	1.59e-06	2.41e-05
ENSGALG00000006911_TMC5	1106.25	1.49941	0.312662	4.79563	1.62e-06	2.46e-05
ENSGALG00000038636_LAPTM5	743.16	1.47156	0.306947	4.79419	1.63e-06	2.47e-05
ENSGALG00000033954_TMEM248	582.485	1.48821	0.31061	4.79125	1.66e-06	2.5e-05
ENSGALG00000049564	89.2652	-2.45681	0.513529	-4.78416	1.72e-06	2.59e-05
ENSGALG00000004290_ANGPTL1	235.285	1.70859	0.35738	4.78087	1.75e-06	2.63e-05
ENSGALG00000054310	25.2255	-3.8894	0.813879	-4.77884	1.76e-06	2.66e-05
ENSGALG00000000946_PFDN1	346.52	-2.06481	0.432366	-4.77561	1.79e-06	2.7e-05
ENSGALG00000003681_TOP1	1214.01	-1.53094	0.320895	-4.77085	1.83e-06	2.76e-05
ENSGALG00000017803_Y_RNA	15.9171	-8.09622	1.69844	-4.76686	1.87e-06	2.81e-05
ENSGALG00000013720_FBXO15	41.0519	3.55574	0.746303	4.76447	1.89e-06	2.84e-05
ENSGALG00000043352	93.1642	2.60767	0.547576	4.7622	1.91e-06	2.87e-05
ENSGALG00000002888_CASZ1	1503.61	-1.7159	0.360356	-4.76169	1.92e-06	2.87e-05
ENSGALG00000016805_SULT1C3	6431.13	-1.57675	0.331134	-4.76166	1.92e-06	2.87e-05
ENSGALG00000030068_RAB3A	227.119	-2.26798	0.476513	-4.75954	1.94e-06	2.9e-05
ENSGALG00000052833	20.6213	-6.01726	1.26427	-4.75947	1.94e-06	2.9e-05
ENSGALG00000000681_PAK1	1551.05	-1.63517	0.343612	-4.75878	1.95e-06	2.9e-05
ENSGALG00000040087_ZNF609	1222.67	-1.66981	0.350901	-4.75865	1.95e-06	2.9e-05
ENSGALG00000039967_RP11-529K1.3	1136.52	-1.53971	0.324503	-4.74482	2.09e-06	3.11e-05
ENSGALG00000043605_BEST4	58.7256	3.0749	0.648484	4.74168	2.12e-06	3.15e-05
ENSGALG00000006074_SOX6	609.103	-1.52271	0.321365	-4.73825	2.16e-06	3.2e-05
ENSGALG00000008054	1071.72	-1.4361	0.303059	-4.73866	2.15e-06	3.2e-05
ENSGALG00000019063_MMP10	339.967	1.74527	0.368335	4.73827	2.16e-06	3.2e-05
ENSGALG00000036821_HSF1	167.176	-1.85565	0.391637	-4.73819	2.16e-06	3.2e-05
ENSGALG00000016560_SELENOI	1755.38	-1.58281	0.334427	-4.7329	2.21e-06	3.28e-05
ENSGALG00000054240	197.599	-1.81271	0.383513	-4.72658	2.28e-06	3.38e-05
ENSGALG00000000669_ETV3	328.541	-1.85648	0.392799	-4.72628	2.29e-06	3.38e-05
ENSGALG00000008902_GIPC2	1662.9	-1.74538	0.369488	-4.72379	2.31e-06	3.42e-05
ENSGALG00000030164_ECH1	1956.38	-1.58107	0.334721	-4.72355	2.32e-06	3.42e-05
ENSGALG00000017907_U4	85.9323	-2.81425	0.595885	-4.72281	2.33e-06	3.43e-05
ENSGALG00000008237_GRAMD2B	768.922	-1.76882	0.374653	-4.72122	2.34e-06	3.45e-05
ENSGALG00000001741_NPTN	2129.94	-1.39814	0.296245	-4.71953	2.36e-06	3.48e-05
ENSGALG00000004449_CYP3A5	8114.87	-2.12714	0.451207	-4.71432	2.43e-06	3.56e-05
ENSGALG00000016833_F7	41.2985	-2.87897	0.610674	-4.71442	2.42e-06	3.56e-05
ENSGALG00000000156_BRD2	1969.43	-1.74445	0.370192	-4.71227	2.45e-06	3.59e-05
ENSGALG00000014331_FKBP4	2652.57	-1.44783	0.307311	-4.71129	2.46e-06	3.6e-05
ENSGALG00000026302_SRPRB	505.895	-1.4731	0.312684	-4.71114	2.46e-06	3.6e-05
ENSGALG00000001647_PSKH1	94.5978	-2.07076	0.439609	-4.71046	2.47e-06	3.61e-05
ENSGALG00000007364_TOB1	1057.94	-1.62405	0.344804	-4.71007	2.48e-06	3.62e-05
ENSGALG00000037325_SERP1	1169.77	-1.56393	0.332573	-4.70254	2.57e-06	3.75e-05
ENSGALG00000012526_PRPF40A	1569.77	-1.37169	0.291765	-4.70136	2.58e-06	3.76e-05
ENSGALG00000023772_HSPB7	96.4587	2.15893	0.459213	4.70137	2.58e-06	3.76e-05
ENSGALG00000010645_ENPP6	1496.89	1.43019	0.304276	4.70031	2.6e-06	3.78e-05
ENSGALG00000044780	640.978	-1.89826	0.403944	-4.6993	2.61e-06	3.79e-05
ENSGALG00000006731_TAF3	904.816	-1.51293	0.321981	-4.69881	2.62e-06	3.8e-05
ENSGALG00000015396_CD200	353.96	1.57557	0.335422	4.69729	2.64e-06	3.82e-05
ENSGALG00000005156	111.03	-1.95177	0.415543	-4.69692	2.64e-06	3.83e-05
ENSGALG00000028721_LMOD1	939.34	-1.74548	0.371637	-4.69673	2.64e-06	3.83e-05
ENSGALG00000050133	230.824	1.97553	0.420735	4.69541	2.66e-06	3.85e-05
ENSGALG00000014336_RELL1	897.696	1.42955	0.304534	4.69422	2.68e-06	3.87e-05
ENSGALG00000004956_GPI	3927.49	-1.35949	0.289656	-4.69346	2.69e-06	3.88e-05
ENSGALG00000000793_VPS72	717.396	-1.84125	0.392345	-4.69293	2.69e-06	3.88e-05
ENSGALG00000008738	457.58	-1.76169	0.375508	-4.69149	2.71e-06	3.91e-05
ENSGALG00000032868_AHCYL2	1829.92	-1.50061	0.319896	-4.69094	2.72e-06	3.92e-05
ENSGALG00000004336_INPPL1	137.959	2.02571	0.431939	4.68981	2.73e-06	3.93e-05
ENSGALG00000006322_CLCA1	15805	-1.96082	0.418115	-4.68965	2.74e-06	3.93e-05
ENSGALG00000016934	61.748	2.60652	0.55679	4.68133	2.85e-06	4.09e-05
ENSGALG00000031482_Pou5f3	104.497	-2.10888	0.450573	-4.68045	2.86e-06	4.11e-05
ENSGALG00000046702	21.1586	-5.99328	1.28096	-4.67873	2.89e-06	4.14e-05
ENSGALG00000009421_SRSF5	445.869	-1.56712	0.335055	-4.67721	2.91e-06	4.16e-05
ENSGALG00000041732_NOL4L	212.942	-2.06121	0.440814	-4.67592	2.93e-06	4.19e-05
ENSGALG00000037826	66.3118	2.51513	0.537934	4.67554	2.93e-06	4.19e-05
ENSGALG00000010592_TET2	1784.34	-1.56574	0.33493	-4.67483	2.94e-06	4.2e-05
ENSGALG00000052737	1026.58	-1.45941	0.312204	-4.67455	2.95e-06	4.2e-05
ENSGALG00000016419_ASAP2	880.516	-1.51239	0.323559	-4.67423	2.95e-06	4.2e-05
ENSGALG00000033034_SLC25A34	180.038	-1.87819	0.40195	-4.67269	2.97e-06	4.23e-05
ENSGALG00000016918_GATD3AL1	661.233	1.44904	0.310133	4.67233	2.98e-06	4.24e-05
ENSGALG00000006655_MAP3K13	1320.18	-1.50731	0.322974	-4.66697	3.06e-06	4.34e-05
ENSGALG00000039989_GPR160	149.602	2.25725	0.483723	4.66641	3.07e-06	4.35e-05
ENSGALG00000028560_OC3	178.613	1.90026	0.407272	4.66583	3.07e-06	4.36e-05
ENSGALG00000038143	668.21	-1.47628	0.316584	-4.66316	3.11e-06	4.41e-05
ENSGALG00000026152	1262.9	-1.55793	0.334159	-4.66225	3.13e-06	4.43e-05
ENSGALG00000006910_IMPDH2	648.423	-1.5279	0.327754	-4.66173	3.14e-06	4.43e-05
ENSGALG00000028084_FAAH2	1082.16	-1.43025	0.306973	-4.65921	3.17e-06	4.49e-05
ENSGALG00000008240_CFLAR	1004.17	1.42935	0.306885	4.65762	3.2e-06	4.52e-05
ENSGALG00000011186_ERMARD	171.249	1.84689	0.396582	4.65702	3.21e-06	4.52e-05
ENSGALG00000039376_DPT	1469.79	1.66382	0.357548	4.65343	3.26e-06	4.6e-05
ENSGALG00000011682_CNOT4	247.706	-1.64341	0.353602	-4.64764	3.36e-06	4.73e-05
ENSGALG00000002002_BCAS2	259.836	-1.61309	0.34722	-4.64575	3.39e-06	4.77e-05
ENSGALG00000014646_SYT11	417.823	1.54927	0.333574	4.64446	3.41e-06	4.79e-05
ENSGALG00000012410	201.067	-1.6941	0.364834	-4.64349	3.43e-06	4.81e-05
ENSGALG00000032257_CSNK1E	775.877	-1.57043	0.338241	-4.64292	3.44e-06	4.82e-05
ENSGALG00000055021_GREM2	193.86	1.80705	0.389455	4.63993	3.49e-06	4.88e-05
ENSGALG00000037713_FNDC10	34.9283	3.80948	0.821373	4.63795	3.52e-06	4.93e-05
ENSGALG00000036785_TRIM8	928.223	-1.90503	0.411082	-4.63418	3.58e-06	5.01e-05
ENSGALG00000008257_MERTK	278.945	1.59905	0.345185	4.63245	3.61e-06	5.05e-05
ENSGALG00000014935_GREB1L	222.093	1.69884	0.366765	4.63195	3.62e-06	5.06e-05
ENSGALG00000050207_EMP2	177.399	2.16483	0.467506	4.6306	3.65e-06	5.09e-05
ENSGALG00000009848_LPGAT1	2293.69	-1.62149	0.350247	-4.62957	3.66e-06	5.1e-05
ENSGALG00000010189	3123.8	-1.61574	0.349014	-4.62945	3.67e-06	5.1e-05
ENSGALG00000054304	740.717	-1.63095	0.352602	-4.62546	3.74e-06	5.2e-05
ENSGALG00000041814_DYNC2H1	541.578	1.50169	0.324773	4.62382	3.77e-06	5.24e-05
ENSGALG00000034009_AMPD2	508.05	-2.01328	0.435483	-4.62309	3.78e-06	5.24e-05
ENSGALG00000041337_OTUD6A	1378.22	-1.39475	0.301685	-4.62322	3.78e-06	5.24e-05
ENSGALG00000010737_PLD5	261.421	1.71424	0.370833	4.62267	3.79e-06	5.25e-05
ENSGALG00000054044	449.493	-1.62055	0.350628	-4.62184	3.8e-06	5.27e-05
ENSGALG00000019976	153.653	-1.77998	0.385159	-4.62141	3.81e-06	5.27e-05
ENSGALG00000032386_DCLK2	143.772	1.88808	0.408886	4.61764	3.88e-06	5.36e-05
ENSGALG00000006045_SH3GL3	215.258	1.68032	0.363907	4.61745	3.88e-06	5.36e-05
ENSGALG00000001640_RNF122	161.89	1.99345	0.431991	4.61457	3.94e-06	5.43e-05
ENSGALG00000035050	158.233	1.95908	0.424911	4.61055	4.02e-06	5.54e-05
ENSGALG00000041192_IFIH1	1176.66	-1.43303	0.31098	-4.60812	4.06e-06	5.6e-05
ENSGALG00000003245_LSM1	165.426	-1.87088	0.406043	-4.60759	4.07e-06	5.6e-05
ENSGALG00000015017	70.1591	2.51734	0.546326	4.60776	4.07e-06	5.6e-05
ENSGALG00000006165	312.646	1.89081	0.410598	4.60501	4.12e-06	5.66e-05
ENSGALG00000002944_CPS1	57.8457	-2.3814	0.517376	-4.60284	4.17e-06	5.71e-05
ENSGALG00000040699	428.629	1.56325	0.33962	4.60294	4.17e-06	5.71e-05
ENSGALG00000005985_GDF10	59.5453	2.71456	0.589841	4.60219	4.18e-06	5.73e-05
ENSGALG00000050667	20.0302	-6.5138	1.41588	-4.60052	4.21e-06	5.77e-05
ENSGALG00000015299_TFG	1082.81	-1.44193	0.31348	-4.59976	4.23e-06	5.78e-05
ENSGALG00000049343	31.1196	-3.21713	0.70011	-4.59518	4.32e-06	5.91e-05
ENSGALG00000005584_GALNT18	242.051	1.81969	0.396161	4.59332	4.36e-06	5.95e-05
ENSGALG00000014807_MTX3	387.511	1.51696	0.330242	4.59349	4.36e-06	5.95e-05
ENSGALG00000006568_TM9SF4	452.727	-1.59996	0.348492	-4.59109	4.41e-06	6e-05
ENSGALG00000010627_PRPF38A	294.805	-1.61339	0.351406	-4.59125	4.41e-06	6e-05
ENSGALG00000026838_MDFIC	613.413	1.60728	0.350163	4.5901	4.43e-06	6.02e-05
ENSGALG00000015151_B4GALT6	384.526	1.54819	0.337334	4.58948	4.44e-06	6.04e-05
ENSGALG00000032161_SCUBE2	228.034	1.68678	0.367908	4.5848	4.54e-06	6.17e-05
ENSGALG00000023773	11.9601	-7.90588	1.72495	-4.58325	4.58e-06	6.21e-05
ENSGALG00000000645	135.596	-2.10092	0.459444	-4.57274	4.81e-06	6.52e-05
ENSGALG00000008487_TMCC1	848.357	-1.41606	0.309894	-4.56949	4.89e-06	6.61e-05
ENSGALG00000011688_TCP11L1	454.101	1.4949	0.327146	4.56952	4.89e-06	6.61e-05
ENSGALG00000003385_LSM4	238.155	-1.59106	0.348266	-4.56851	4.91e-06	6.64e-05
ENSGALG00000048578	34.1487	-3.38161	0.740281	-4.56801	4.92e-06	6.65e-05
ENSGALG00000001049	1536.07	-1.49077	0.326519	-4.56563	4.98e-06	6.71e-05
ENSGALG00000002624_BMS1	798.012	-1.58453	0.347049	-4.56573	4.98e-06	6.71e-05
ENSGALG00000051148	57.0853	-2.55881	0.560535	-4.56493	5e-06	6.73e-05
ENSGALG00000004869_ISCU	947.597	-1.38834	0.304202	-4.56388	5.02e-06	6.76e-05
ENSGALG00000041419	1078.98	-1.95043	0.427672	-4.56058	5.1e-06	6.86e-05
ENSGALG00000037603	551.112	-1.68585	0.369688	-4.56018	5.11e-06	6.86e-05
ENSGALG00000052612_RPS27L	2051.95	1.65447	0.36282	4.56003	5.11e-06	6.86e-05
ENSGALG00000042001	447.751	-1.99944	0.438516	-4.55956	5.13e-06	6.87e-05
ENSGALG00000043628_UBE2M	165.008	-1.80727	0.396555	-4.55742	5.18e-06	6.94e-05
ENSGALG00000048887	52.6862	-3.26525	0.716725	-4.55579	5.22e-06	6.99e-05
ENSGALG00000052222	95.039	2.12082	0.465973	4.55138	5.33e-06	7.13e-05
ENSGALG00000002891_ACADL	4946.04	-1.41774	0.311631	-4.54941	5.38e-06	7.19e-05
ENSGALG00000008569_CHP1	2469.62	-1.35577	0.298209	-4.54637	5.46e-06	7.28e-05
ENSGALG00000036019_POLR2K	21.8377	-3.83698	0.843937	-4.54653	5.45e-06	7.28e-05
ENSGALG00000038666	55.7231	-2.40768	0.529897	-4.54367	5.53e-06	7.37e-05
ENSGALG00000009475_FAM133B	1117.84	-1.4015	0.308515	-4.54274	5.55e-06	7.39e-05
ENSGALG00000008014_CEBPB	192.993	1.7602	0.387546	4.54192	5.57e-06	7.42e-05
ENSGALG00000006670_PPP1R3C	207.22	1.83901	0.405286	4.53755	5.69e-06	7.56e-05
ENSGALG00000028872_TPT1	8559.63	-1.26851	0.279704	-4.53517	5.76e-06	7.64e-05
ENSGALG00000015663_HSDL2	2384.09	-1.65095	0.364167	-4.53349	5.8e-06	7.7e-05
ENSGALG00000007215_KIF5B	2944.81	-1.28863	0.284323	-4.5323	5.83e-06	7.73e-05
ENSGALG00000049929_LIAS	237.49	-1.56532	0.34564	-4.52876	5.93e-06	7.86e-05
ENSGALG00000013041_CCT5	1777.22	-1.43244	0.316572	-4.52483	6.04e-06	8e-05
ENSGALG00000006841_POLR2L	294.97	1.57178	0.347522	4.52283	6.1e-06	8.06e-05
ENSGALG00000012173_LGALS3	2594.48	1.82434	0.403375	4.52268	6.11e-06	8.06e-05
ENSGALG00000037784_DAG1	1143.98	-1.41425	0.31269	-4.52284	6.1e-06	8.06e-05
ENSGALG00000039349_DISC1	210.116	1.78987	0.395777	4.52242	6.11e-06	8.06e-05
ENSGALG00000004645_TBC1D13	224.111	-1.78662	0.395085	-4.52212	6.12e-06	8.07e-05
ENSGALG00000041380_BF2	14294.2	-1.84506	0.408027	-4.52191	6.13e-06	8.07e-05
ENSGALG00000007078_ENTPD1	375.076	1.72009	0.380651	4.5188	6.22e-06	8.18e-05
ENSGALG00000019384_MAPK12	114.482	2.02036	0.447412	4.51566	6.31e-06	8.29e-05
ENSGALG00000026995_RHOG	76.6931	-2.33103	0.516701	-4.51137	6.44e-06	8.46e-05
ENSGALG00000010244_AKR1A1	1838.64	-1.44476	0.320263	-4.51116	6.45e-06	8.46e-05
ENSGALG00000029000_HYAL3	116.93	1.94002	0.43036	4.5079	6.55e-06	8.58e-05
ENSGALG00000036496_ACTN4	5064.58	-1.40935	0.312746	-4.50636	6.59e-06	8.64e-05
ENSGALG00000000122_GNB2L1	7654.48	1.293	0.287029	4.50476	6.64e-06	8.69e-05
ENSGALG00000045548	65.3166	2.50933	0.557178	4.50364	6.68e-06	8.73e-05
ENSGALG00000034919_CDK2AP1	222.531	1.90301	0.42262	4.50288	6.7e-06	8.76e-05
ENSGALG00000044739	42.6439	-2.8263	0.628432	-4.49739	6.88e-06	8.98e-05
ENSGALG00000016447_PDIA6	2473.91	-1.54185	0.342963	-4.49568	6.93e-06	9.04e-05
ENSGALG00000016932_MZT1	94.3951	2.32568	0.517662	4.49267	7.03e-06	9.16e-05
ENSGALG00000010736_DIO1	90.2198	-2.63334	0.586346	-4.4911	7.09e-06	9.22e-05
ENSGALG00000026229_PIGY	120.545	1.89575	0.422232	4.48983	7.13e-06	9.27e-05
ENSGALG00000007582_DPYSL3	753.866	1.58335	0.352789	4.4881	7.19e-06	9.33e-05
ENSGALG00000011966_RANGAP1	732.326	-1.53692	0.342432	-4.48824	7.18e-06	9.33e-05
ENSGALG00000023199_HNRNPDL	5585.99	-1.3078	0.291595	-4.48499	7.29e-06	9.46e-05
ENSGALG00000014203_PARVG	221.328	1.672	0.372875	4.48407	7.32e-06	9.49e-05
ENSGALG00000050515	29.322	5.37983	1.19991	4.48353	7.34e-06	9.51e-05
ENSGALG00000026884	102.768	2.13546	0.476521	4.48136	7.42e-06	9.6e-05
ENSGALG00000032220_ELN	205.478	-1.88596	0.420935	-4.4804	7.45e-06	9.63e-05
ENSGALG00000001968_SYT6	50.8451	2.70957	0.605244	4.47682	7.58e-06	9.79e-05
ENSGALG00000044210_QPCTL	289.706	-1.55091	0.346464	-4.4764	7.59e-06	9.8e-05
ENSGALG00000006560_SEMA3A	337.089	1.68032	0.375399	4.47609	7.6e-06	9.8e-05
ENSGALG00000005552_PTBP2	864.599	1.43372	0.320374	4.47513	7.64e-06	9.84e-05
ENSGALG00000012370_GINM1	873.267	1.36823	0.305788	4.47444	7.66e-06	9.86e-05
ENSGALG00000054415	72.4303	-2.28167	0.510121	-4.47281	7.72e-06	9.93e-05
ENSGALG00000002197_NPM1	6177.81	-1.31721	0.294633	-4.47068	7.8e-06	0.00010022
ENSGALG00000003693_MACF1	6892.1	-1.58768	0.355284	-4.46877	7.87e-06	0.00010103
ENSGALG00000039735_EML1	324.623	1.72338	0.385901	4.46585	7.98e-06	0.00010233
ENSGALG00000009177_FMR1	1150.68	-1.30987	0.293365	-4.46497	8.01e-06	0.00010267
ENSGALG00000048627	24.3992	-6.87082	1.53929	-4.46362	8.06e-06	0.00010323
ENSGALG00000002553_PCDH1	1048.09	-1.77266	0.39749	-4.45964	8.21e-06	0.00010499
ENSGALG00000010371_FAM13A	1561.32	-1.30331	0.292244	-4.45965	8.21e-06	0.00010499
ENSGALG00000035252_RPL7	8766.27	1.40648	0.315396	4.45942	8.22e-06	0.00010501
ENSGALG00000008791_NMT2	534.222	1.40074	0.314212	4.45796	8.27e-06	0.00010563
ENSGALG00000033862	1591.56	-1.32899	0.298171	-4.45713	8.31e-06	0.00010596
ENSGALG00000026850_TICAM1	365.811	-1.53125	0.34358	-4.45676	8.32e-06	0.00010605
ENSGALG00000042511_PKDCC	242.014	1.647	0.369718	4.45474	8.4e-06	0.00010687
ENSGALG00000050097	85.8435	-2.23256	0.501157	-4.45481	8.4e-06	0.00010687
ENSGALG00000003439_PLEKHM2	807.222	-1.40146	0.314646	-4.45407	8.43e-06	0.00010703
ENSGALG00000050229	308.574	-1.63236	0.366485	-4.45408	8.43e-06	0.00010703
ENSGALG00000012873_SERPINB5	51.2502	3.56332	0.800479	4.45149	8.53e-06	0.00010824
ENSGALG00000016820_GAS6	298.987	1.66025	0.373223	4.44843	8.65e-06	0.00010967
ENSGALG00000037483_ANP32B	635.386	-1.46481	0.329296	-4.44831	8.65e-06	0.00010967
ENSGALG00000022991_SMIM20	345.368	1.63541	0.367801	4.44647	8.73e-06	0.00011052
ENSGALG00000030800_IL31RA	244.358	1.70137	0.382907	4.44331	8.86e-06	0.00011206
ENSGALG00000009576_BPNT1	582.624	-1.83774	0.413803	-4.44109	8.95e-06	0.00011313
ENSGALG00000051594_FBXO46	123.747	-2.1735	0.489547	-4.43981	9e-06	0.00011371
ENSGALG00000008341_FURIN	424.556	-1.8385	0.414481	-4.43565	9.18e-06	0.00011583
ENSGALG00000031410_ENPEP	25840.2	1.60785	0.362526	4.43513	9.2e-06	0.00011602
ENSGALG00000016964	141.494	-1.74608	0.393756	-4.43442	9.23e-06	0.0001163
ENSGALG00000019867_WDCP	66.9035	2.44129	0.551137	4.42955	9.44e-06	0.00011886
ENSGALG00000027980_NANOS1	55.2486	2.77496	0.626889	4.42657	9.57e-06	0.00012042
ENSGALG00000053353_BOP1	321.756	-1.62931	0.368108	-4.42618	9.59e-06	0.00012053
ENSGALG00000036935	396.032	-1.6442	0.371564	-4.42509	9.64e-06	0.00012105
ENSGALG00000023083	60.6131	2.49242	0.563529	4.42288	9.74e-06	0.00012219
ENSGALG00000014570_LPCAT3	852.42	-1.32775	0.300262	-4.42197	9.78e-06	0.0001226
ENSGALG00000007887_AAGAB	312.054	-1.47681	0.334161	-4.41945	9.9e-06	0.00012385
ENSGALG00000008590_EEF1B2	5786.37	1.41515	0.32021	4.41943	9.9e-06	0.00012385
ENSGALG00000003304_CRTC1	159.285	-1.7617	0.398699	-4.41861	9.93e-06	0.00012422
ENSGALG00000001731_CDK12	555.084	-1.57173	0.355786	-4.41763	9.98e-06	0.00012468
ENSGALG00000002118_KCNMB1	879.32	1.44351	0.326806	4.41702	1e-05	0.00012493
ENSGALG00000026892	114.743	2.11262	0.47845	4.41556	1.01e-05	0.00012567
ENSGALG00000000218_SRP19	860.496	-1.44153	0.326674	-4.41273	1.02e-05	0.00012712
ENSGALG00000050752	73.4923	2.43267	0.551283	4.41274	1.02e-05	0.00012712
ENSGALG00000008098_NAMPTP1	1114.82	-1.48781	0.337283	-4.41117	1.03e-05	0.00012793
ENSGALG00000005363_CHDH	721.717	1.69984	0.38544	4.41013	1.03e-05	0.00012834
ENSGALG00000038152_ABCC6	506.36	-1.45825	0.33066	-4.41012	1.03e-05	0.00012834
ENSGALG00000008486_CACNA2D1	864.018	1.61468	0.366439	4.40641	1.05e-05	0.00013045
ENSGALG00000002775_FA2H	862.038	-1.8222	0.413563	-4.4061	1.05e-05	0.00013053
ENSGALG00000017135_CRYL1	1905.82	-1.67628	0.380656	-4.40367	1.06e-05	0.0001319
ENSGALG00000008901_PTGFR	81.0004	2.39258	0.543791	4.39982	1.08e-05	0.00013396
ENSGALG00000011740_MGP	2561.36	1.43649	0.32649	4.39978	1.08e-05	0.00013396
ENSGALG00000032148_CANX	5312.09	-1.33732	0.303935	-4.40002	1.08e-05	0.00013396
ENSGALG00000002159_ACOX1	10092.7	-1.48593	0.337756	-4.39942	1.09e-05	0.00013407
ENSGALG00000017336	414.499	-1.59996	0.363745	-4.39857	1.09e-05	0.00013449
ENSGALG00000000708_NUCKS1	1839.25	-1.28841	0.293014	-4.3971	1.1e-05	0.00013529
ENSGALG00000033938_ARHGAP26	958.49	-1.56097	0.355122	-4.39559	1.1e-05	0.00013612
ENSGALG00000004467_CLIP1	2628.13	-1.29767	0.295309	-4.39427	1.11e-05	0.00013684
ENSGALG00000002836_PEX14	239.326	-1.52403	0.346857	-4.39383	1.11e-05	0.00013701
ENSGALG00000015830_SYNCRIP	1354.35	-1.43984	0.3278	-4.39242	1.12e-05	0.00013779
ENSGALG00000003153_COPE	976.071	-1.30129	0.296282	-4.39207	1.12e-05	0.0001379
ENSGALG00000003786_BRD7	1045.73	-1.30928	0.298218	-4.39036	1.13e-05	0.00013863
ENSGALG00000006043_RBBP6	1875.87	-1.30814	0.297934	-4.3907	1.13e-05	0.00013863
ENSGALG00000032223	93.252	-2.02904	0.462143	-4.3905	1.13e-05	0.00013863
ENSGALG00000054759_B3GALNT1	202.57	1.70917	0.389312	4.39023	1.13e-05	0.00013863
ENSGALG00000036293_EBAG9	934.956	-1.39484	0.317836	-4.38854	1.14e-05	0.0001396
ENSGALG00000010476_BNIP3	616.924	1.40356	0.319864	4.38799	1.14e-05	0.00013984
ENSGALG00000006138_HELZ2	1525.01	-1.85488	0.422797	-4.38716	1.15e-05	0.00014023
ENSGALG00000052378	11.3656	-7.61025	1.73471	-4.38704	1.15e-05	0.00014023
ENSGALG00000008931_COMMD1	375.559	1.55468	0.354554	4.3849	1.16e-05	0.00014145
ENSGALG00000010078_GLP1R	337.465	1.49041	0.339903	4.3848	1.16e-05	0.00014145
ENSGALG00000032856_GFRA2	152.362	1.87614	0.427935	4.38416	1.16e-05	0.00014175
ENSGALG00000008676_RRBP1	1988.96	-1.31706	0.300506	-4.3828	1.17e-05	0.00014253
ENSGALG00000032336_SLC25A10	334.465	-1.52062	0.346972	-4.38254	1.17e-05	0.00014258
ENSGALG00000028821_GLIPR2	209.659	1.72009	0.392713	4.38001	1.19e-05	0.00014413
ENSGALG00000001279_ZNF652	767.671	-1.42485	0.325423	-4.37846	1.2e-05	0.00014493
ENSGALG00000017072	485.356	-1.36751	0.312315	-4.37864	1.19e-05	0.00014493
ENSGALG00000013785_GNAL	418.042	-1.50817	0.344576	-4.3769	1.2e-05	0.00014586
ENSGALG00000015573_FHL5	796.475	1.38719	0.316996	4.37605	1.21e-05	0.00014631
ENSGALG00000037200	548.267	-1.6256	0.371602	-4.37458	1.22e-05	0.00014718
ENSGALG00000054806	16.1328	-5.67798	1.29816	-4.37385	1.22e-05	0.00014755
ENSGALG00000005504_HNF1B	284.537	-1.74958	0.400045	-4.37346	1.22e-05	0.00014758
ENSGALG00000005675_PTTG1IP	590.454	1.65356	0.378081	4.37357	1.22e-05	0.00014758
ENSGALG00000006895_CEP131	247.52	-1.6046	0.367056	-4.37153	1.23e-05	0.00014878
ENSGALG00000041914_BRI3	520.751	1.66088	0.380022	4.37049	1.24e-05	0.00014937
ENSGALG00000009842_RASSF3	3537.87	-1.40193	0.320966	-4.36786	1.25e-05	0.00015106
ENSGALG00000011290_RPL15	5891.46	1.30891	0.299754	4.36662	1.26e-05	0.0001518
ENSGALG00000007570	414.929	-1.54722	0.354507	-4.36442	1.27e-05	0.00015322
ENSGALG00000016548_SYAP1	1731.49	-1.34502	0.308347	-4.36204	1.29e-05	0.00015477
ENSGALG00000010581_SEL1L	1637.55	-1.27727	0.292828	-4.36185	1.29e-05	0.00015478
ENSGALG00000025804_CLCN2	771.893	-1.59883	0.366627	-4.36092	1.3e-05	0.00015532
ENSGALG00000049431	861.109	-1.34212	0.307978	-4.35783	1.31e-05	0.00015741
ENSGALG00000009755_LRIG3	397.076	1.52645	0.350311	4.35741	1.32e-05	0.00015758
ENSGALG00000040921_RRM2B	265.938	-1.48702	0.341386	-4.35583	1.33e-05	0.0001586
ENSGALG00000048002_CCS	1358.63	-1.47922	0.339616	-4.35557	1.33e-05	0.00015866
ENSGALG00000026572_RGS5	5965.77	1.29574	0.297517	4.3552	1.33e-05	0.0001588
ENSGALG00000015529_WFS1	1545.89	1.28283	0.294604	4.3544	1.33e-05	0.00015926
ENSGALG00000013878_PCYOX1	1320.32	-1.32685	0.304835	-4.35269	1.34e-05	0.00016039
ENSGALG00000025738_RHOU	308.043	-1.51178	0.347398	-4.35171	1.35e-05	0.00016098
ENSGALG00000031571_H2A-VI	1399.96	1.56823	0.36049	4.35027	1.36e-05	0.00016191
ENSGALG00000001597_PSMB3	236.14	-1.61693	0.371726	-4.34979	1.36e-05	0.00016191
ENSGALG00000011170_WIPF3	196.469	-1.94684	0.447576	-4.34975	1.36e-05	0.00016191
ENSGALG00000011783_HIST1H111R	450.381	1.45612	0.33474	4.35002	1.36e-05	0.00016191
ENSGALG00000011221_GPAT3	1080.14	-1.29172	0.297039	-4.34867	1.37e-05	0.00016259
ENSGALG00000016001_LZTS3	359.343	-1.56172	0.359225	-4.34747	1.38e-05	0.00016335
ENSGALG00000038652	112.576	2.08724	0.480231	4.34632	1.38e-05	0.00016408
ENSGALG00000008725_KIF16B	2448.93	-1.27687	0.293795	-4.34612	1.39e-05	0.0001641
ENSGALG00000003845_MKNK2	474.62	-1.97159	0.453852	-4.34412	1.4e-05	0.00016535
ENSGALG00000012681_MBOAT1	211.823	1.7197	0.395867	4.34415	1.4e-05	0.00016535
ENSGALG00000011794_DDX47	229.874	-1.69099	0.389417	-4.34237	1.41e-05	0.00016654
ENSGALG00000005465_NDUFB10	1496.31	-1.38404	0.318787	-4.34159	1.41e-05	0.000167
ENSGALG00000028471_CNPY3	908.633	-1.47805	0.340558	-4.34009	1.42e-05	0.00016795
ENSGALG00000031222_SPRYD3	876.2	-1.47886	0.34075	-4.34001	1.42e-05	0.00016795
ENSGALG00000007101_ZPR1	389.424	-1.50691	0.347345	-4.33837	1.44e-05	0.00016896
ENSGALG00000019514_CNDP2	6160.05	-1.47776	0.340628	-4.33835	1.44e-05	0.00016896
ENSGALG00000039458_GDF8	125.646	1.99928	0.460885	4.33792	1.44e-05	0.00016916
ENSGALG00000006705	1107	1.39132	0.320799	4.33703	1.44e-05	0.00016957
ENSGALG00000044813_THUMPD3	810.628	-1.29878	0.299466	-4.33697	1.44e-05	0.00016957
ENSGALG00000052243_CYP2C18	355.9	-2.3085	0.532296	-4.33688	1.45e-05	0.00016957
ENSGALG00000005823_HDLBP	12218.1	-1.28174	0.295761	-4.33371	1.47e-05	0.0001719
ENSGALG00000033513_ELL	673.832	-1.49016	0.343932	-4.33272	1.47e-05	0.00017254
ENSGALG00000036962_KPNB1	1070.74	-1.57797	0.364368	-4.3307	1.49e-05	0.000174
ENSGALG00000001555_AURKAIP1	335.298	-1.50578	0.347978	-4.32723	1.51e-05	0.00017662
ENSGALG00000034741_ETNPPL	937.849	-1.50327	0.347434	-4.32678	1.51e-05	0.00017685
ENSGALG00000031160_GRSF1	377.554	-1.5655	0.361859	-4.32627	1.52e-05	0.00017712
ENSGALG00000016721_PLCXD1	198.227	1.65747	0.383222	4.32509	1.52e-05	0.00017793
ENSGALG00000001028	130.667	-1.80288	0.41691	-4.32439	1.53e-05	0.00017836
ENSGALG00000011937_NFE2L1	2176.78	-1.52351	0.352358	-4.32377	1.53e-05	0.00017873
ENSGALG00000004115_DNAJA2	1735.31	-1.23942	0.286665	-4.3236	1.54e-05	0.00017873
ENSGALG00000020747_MBD4	197.736	-1.56663	0.362372	-4.32326	1.54e-05	0.00017887
ENSGALG00000001383_HTR4	96.409	-1.99475	0.461439	-4.32289	1.54e-05	0.00017903
ENSGALG00000011861_SYT16	44.4178	2.82681	0.653963	4.32259	1.54e-05	0.00017914
ENSGALG00000001573_P2RX1	250.196	1.55379	0.359517	4.32188	1.55e-05	0.00017958
ENSGALG00000029346	110.86	-1.79159	0.414862	-4.31853	1.57e-05	0.00018219
ENSGALG00000014982_RBBP8	509.709	-1.38716	0.321302	-4.3173	1.58e-05	0.00018307
ENSGALG00000049395	55.4034	2.50581	0.580594	4.31595	1.59e-05	0.00018405
ENSGALG00000027269_GUCA2B	75182.7	1.49179	0.34568	4.31553	1.59e-05	0.00018426
ENSGALG00000028517_EIF1	774.065	-1.54144	0.357322	-4.31387	1.6e-05	0.00018551
ENSGALG00000034955_DCTN2	588.185	-1.53036	0.354816	-4.31312	1.61e-05	0.000186
ENSGALG00000004282_RCAN3	494.975	1.36567	0.316702	4.31218	1.62e-05	0.00018665
ENSGALG00000031932_AGPAT3	478.771	-1.34616	0.312363	-4.30958	1.64e-05	0.00018871
ENSGALG00000012121	188.784	-1.8143	0.421184	-4.30762	1.65e-05	0.00019025
ENSGALG00000021027_PDCD7	353.104	-1.45828	0.338716	-4.30531	1.67e-05	0.00019199
ENSGALG00000050797_SOCS7	239.611	-1.56929	0.364504	-4.30527	1.67e-05	0.00019199
ENSGALG00000003991_MRTO4	338.505	-1.62458	0.377382	-4.30488	1.67e-05	0.00019218
ENSGALG00000001722_E2F4	307.301	-1.70488	0.396073	-4.30446	1.67e-05	0.0001924
ENSGALG00000015019	622.39	-1.32852	0.308798	-4.30222	1.69e-05	0.00019421
ENSGALG00000005332_CACNA1D	173.111	1.65874	0.385634	4.30135	1.7e-05	0.00019483
ENSGALG00000050609	20.3615	-6.99851	1.62835	-4.2979	1.72e-05	0.00019773
ENSGALG00000037665_LMBR1L	44.5337	-2.48689	0.578707	-4.29732	1.73e-05	0.0001981
ENSGALG00000000764_SSR2	910.354	-1.29338	0.301153	-4.29478	1.75e-05	0.00020017
ENSGALG00000011078_PTPN13	357.708	1.59662	0.371768	4.29468	1.75e-05	0.00020017
ENSGALG00000023142_PTGER3	45.2646	2.74371	0.63897	4.29396	1.76e-05	0.00020068
ENSGALG00000016724_RGN	290.195	-1.54118	0.359181	-4.29082	1.78e-05	0.00020329
ENSGALG00000045814_CRLF2	99.4894	2.02367	0.471636	4.29075	1.78e-05	0.00020329
ENSGALG00000013853_AFG3L2	1063.22	-1.25855	0.293386	-4.28975	1.79e-05	0.00020375
ENSGALG00000043035_SHISA2	191.774	1.59229	0.37116	4.29003	1.79e-05	0.00020375
ENSGALG00000047646_CCNT1	238.069	-1.66503	0.388135	-4.28983	1.79e-05	0.00020375
ENSGALG00000042984	1636.81	-1.50524	0.351115	-4.28702	1.81e-05	0.00020612
ENSGALG00000038162_FAM26E	104.673	1.95346	0.456443	4.27974	1.87e-05	0.00021282
ENSGALG00000027332_TMEM167A	569.03	1.39757	0.326598	4.27916	1.88e-05	0.00021321
ENSGALG00000000579_VAMP3	421.767	-1.45137	0.339206	-4.27873	1.88e-05	0.00021346
ENSGALG00000017036_LHFPL6	238.13	1.65235	0.386394	4.27634	1.9e-05	0.00021561
ENSGALG00000009173_GFRA1	189.107	1.81812	0.425198	4.27595	1.9e-05	0.00021567
ENSGALG00000035841_PRRC2C	6288.07	-1.2351	0.288842	-4.27602	1.9e-05	0.00021567
ENSGALG00000050471	23.857	-3.49042	0.816521	-4.27475	1.91e-05	0.00021666
ENSGALG00000004068_FAM114A2	933.96	-1.28665	0.301125	-4.27282	1.93e-05	0.00021838
ENSGALG00000015105_PSIP1	404.181	-1.5386	0.360307	-4.27026	1.95e-05	0.00022075
ENSGALG00000004034_CAPZB	1253.27	-1.25586	0.294311	-4.26714	1.98e-05	0.00022369
ENSGALG00000031303_FAM234A	689.016	-1.29954	0.304616	-4.26614	1.99e-05	0.00022452
ENSGALG00000041298	749.051	-1.4692	0.344713	-4.26211	2.03e-05	0.00022845
ENSGALG00000043929	257.706	-1.4696	0.344859	-4.26145	2.03e-05	0.00022895
ENSGALG00000017274_CD9	108.353	1.92493	0.451863	4.25998	2.04e-05	0.00023029
ENSGALG00000001328_BSG	3656.82	-1.29879	0.304948	-4.25904	2.05e-05	0.00023109
ENSGALG00000010273_PPP2CB	594.686	-1.4113	0.331513	-4.25716	2.07e-05	0.00023287
ENSGALG00000032430_IPO5	2198.97	1.23499	0.290161	4.25622	2.08e-05	0.0002335
ENSGALG00000049677	36.6181	-3.19272	0.75013	-4.25622	2.08e-05	0.0002335
ENSGALG00000033126_DGCR8	725.611	-1.32901	0.312327	-4.25519	2.09e-05	0.00023441
ENSGALG00000004821_PTPN11	823.26	-1.28321	0.301631	-4.25425	2.1e-05	0.00023523
ENSGALG00000054496	328.177	-1.57505	0.370268	-4.25382	2.1e-05	0.0002355
ENSGALG00000042572	183.742	1.65893	0.390019	4.25347	2.1e-05	0.0002357
ENSGALG00000049119_ZNF638	849.41	-1.58347	0.372329	-4.25288	2.11e-05	0.00023615
ENSGALG00000000154_DENND2D	244.338	-1.56055	0.367051	-4.25158	2.12e-05	0.00023735
ENSGALG00000033855_GOLT1B	245.99	1.5276	0.359348	4.25104	2.13e-05	0.00023765
ENSGALG00000046125_PECAM1	1487.51	1.45472	0.342209	4.25097	2.13e-05	0.00023765
ENSGALG00000007645	1087.55	-1.33906	0.315027	-4.25063	2.13e-05	0.00023783
ENSGALG00000024466_CCL17	37.154	3.11044	0.731812	4.25033	2.13e-05	0.00023798
ENSGALG00000007171	754.974	1.35409	0.318604	4.25008	2.14e-05	0.00023807
ENSGALG00000004190_RNF34	1464.15	-1.33459	0.314076	-4.24927	2.14e-05	0.00023875
ENSGALG00000003886_SGCD	117.982	1.9555	0.460277	4.24854	2.15e-05	0.00023936
ENSGALG00000041454_DNMT3A	583.418	-1.60046	0.376796	-4.24756	2.16e-05	0.00024023
ENSGALG00000025991_GLOD5	17.9498	-4.41477	1.0395	-4.24701	2.17e-05	0.00024064
ENSGALG00000043573_CHMP4C	1688.83	-1.27996	0.301465	-4.2458	2.18e-05	0.00024178
ENSGALG00000003457_CNP	560.364	-1.38908	0.327201	-4.24536	2.18e-05	0.00024207
ENSGALG00000005708_HNF4beta	1392.58	-1.24923	0.294407	-4.24321	2.2e-05	0.00024422
ENSGALG00000004332_PLA2G12B	967.933	-1.39357	0.328717	-4.23942	2.24e-05	0.0002482
ENSGALG00000054271_MED28	200.143	1.82392	0.430727	4.23451	2.29e-05	0.00025351
ENSGALG00000001025_GOLGA1	647.267	-1.30186	0.307471	-4.23409	2.29e-05	0.00025379
ENSGALG00000016322	135.127	1.81736	0.429253	4.23377	2.3e-05	0.00025379
ENSGALG00000039141_CERS2	1011.61	-1.51331	0.357433	-4.23384	2.3e-05	0.00025379
ENSGALG00000050799	248.304	-1.55848	0.368221	-4.23245	2.31e-05	0.00025509
ENSGALG00000010612_PRKD3	751.597	1.37367	0.324575	4.23222	2.31e-05	0.00025517
ENSGALG00000048394_AP2S1	367.313	-1.58079	0.3736	-4.23124	2.32e-05	0.0002561
ENSGALG00000029768_PTGDR	119.022	1.78601	0.422136	4.23089	2.33e-05	0.00025613
ENSGALG00000036666_ZCCHC10	274.929	1.48692	0.351436	4.23098	2.33e-05	0.00025613
ENSGALG00000010875_ITGB8	443.737	1.37868	0.325873	4.23072	2.33e-05	0.00025613
ENSGALG00000012696_RANBP9	374.963	1.41578	0.334866	4.2279	2.36e-05	0.00025918
ENSGALG00000017158_POGLUT3	568.609	1.37866	0.326135	4.22727	2.37e-05	0.00025972
ENSGALG00000005503_WFDC1	514.621	1.44074	0.341034	4.22461	2.39e-05	0.00026262
ENSGALG00000042990_IFT27	70.7318	2.15487	0.510099	4.22441	2.4e-05	0.00026266
ENSGALG00000028810_CHCHD10	465.663	-1.38984	0.329128	-4.2228	2.41e-05	0.00026435
ENSGALG00000031702_KMT2D	1791.14	-1.77402	0.420238	-4.22146	2.43e-05	0.00026574
ENSGALG00000011007_OSBPL3	232.076	1.53737	0.36424	4.22077	2.43e-05	0.00026636
ENSGALG00000027472_TMEM38B	572.114	1.31772	0.312211	4.22061	2.44e-05	0.00026636
ENSGALG00000031375_CHST7	82.8563	2.20221	0.52181	4.22034	2.44e-05	0.00026649
ENSGALG00000017048_EXOSC8	156.137	1.66082	0.393592	4.21964	2.45e-05	0.00026712
ENSGALG00000034104_DNAJB12	920.207	-1.3917	0.329891	-4.21868	2.46e-05	0.00026807
ENSGALG00000011457_CCNI	4774.11	-1.41891	0.336779	-4.2132	2.52e-05	0.00027447
ENSGALG00000008072_CHRDL1	1033.55	1.38369	0.328497	4.21218	2.53e-05	0.00027551
ENSGALG00000040189_RIPK4	412.881	-1.73865	0.412845	-4.21137	2.54e-05	0.0002763
ENSGALG00000017168_SLN	57.5404	2.72329	0.646905	4.20972	2.56e-05	0.00027814
ENSGALG00000048866_MARK2	753.693	-1.47914	0.351504	-4.20803	2.58e-05	0.00028002
ENSGALG00000002549_RGS1	309.177	1.69358	0.402611	4.2065	2.59e-05	0.00028172
ENSGALG00000042491	2418.08	1.2131	0.288401	4.2063	2.6e-05	0.00028177
ENSGALG00000034500_CIDEA	1911.15	-1.55036	0.368755	-4.20429	2.62e-05	0.00028408
ENSGALG00000049408_HIST1H2B8	557.177	1.36617	0.325332	4.1993	2.68e-05	0.00029021
ENSGALG00000029276_PPP1R9B	343.364	-1.4898	0.354904	-4.19775	2.7e-05	0.00029199
ENSGALG00000003138_OXTR	37.0719	3.05315	0.727825	4.19489	2.73e-05	0.00029549
ENSGALG00000010633_GPX7	77.1094	2.09092	0.498892	4.19112	2.78e-05	0.00030022
ENSGALG00000010298_DCTN6	452.344	-1.40115	0.334356	-4.19059	2.78e-05	0.00030071
ENSGALG00000002725_UAP1	225.85	-1.46294	0.349163	-4.18986	2.79e-05	0.00030148
ENSGALG00000010084_EIF4G3	1686.45	-1.42542	0.34027	-4.1891	2.8e-05	0.00030211
ENSGALG00000040426_CREG1	1672.84	1.30338	0.311139	4.18906	2.8e-05	0.00030211
ENSGALG00000015419_PENK	88.9967	2.10433	0.502515	4.1876	2.82e-05	0.00030384
ENSGALG00000033137_TLDC1	294.56	1.56298	0.373272	4.18724	2.82e-05	0.00030411
ENSGALG00000005397_GGNBP2	755.019	-1.27219	0.303942	-4.18562	2.84e-05	0.00030607
ENSGALG00000033888_IDH3B	713.492	-1.27489	0.30478	-4.18299	2.88e-05	0.00030941
ENSGALG00000008454_NOP58	667.089	-1.40045	0.33487	-4.18209	2.89e-05	0.00031042
ENSGALG00000049172	17.2862	-4.61663	1.10442	-4.18013	2.91e-05	0.00031289
ENSGALG00000001779_KIAA0895L	106.766	-1.77348	0.424283	-4.17994	2.92e-05	0.00031293
ENSGALG00000051117_GIMD1	54.6806	-2.2294	0.533734	-4.17699	2.95e-05	0.00031679
ENSGALG00000032373	447.044	-1.33168	0.318921	-4.17558	2.97e-05	0.00031854
ENSGALG00000002169_PLEKHB2	2983.46	1.27495	0.305583	4.17217	3.02e-05	0.00032288
ENSGALG00000006912_CPEB3	333.169	-1.5049	0.360686	-4.17233	3.02e-05	0.00032288
ENSGALG00000031388_KLHL5	483.46	1.32969	0.318927	4.16925	3.06e-05	0.00032682
ENSGALG00000006891_ITIH5	1419.17	1.29424	0.310648	4.16625	3.1e-05	0.00033092
ENSGALG00000008997_STEAP4	22.329	-4.41016	1.05871	-4.16561	3.11e-05	0.00033161
ENSGALG00000017394_INSIG1	1749.41	-1.33877	0.321504	-4.16408	3.13e-05	0.0003336
ENSGALG00000007304_DNMBP	1325.33	-1.33821	0.321714	-4.15964	3.19e-05	0.00033993
ENSGALG00000040541_SLC5A6	722.874	-1.30002	0.312553	-4.15937	3.19e-05	0.00034009
ENSGALG00000011497_PECR	649.661	-1.35979	0.326989	-4.15852	3.2e-05	0.00034088
ENSGALG00000030677_ABCG2	2344.39	1.5303	0.367987	4.15857	3.2e-05	0.00034088
ENSGALG00000009677_SSB	1139.78	-1.41441	0.340293	-4.15645	3.23e-05	0.00034374
ENSGALG00000038599_PMM1	798.256	-1.32637	0.319325	-4.15366	3.27e-05	0.00034772
ENSGALG00000033806_ITPRIPL2	62.2672	2.26501	0.545435	4.15267	3.29e-05	0.00034898
ENSGALG00000032250_COQ10A	59.1001	-2.15876	0.519895	-4.15229	3.29e-05	0.00034931
ENSGALG00000001613_GNL3	1028.44	-1.21953	0.293727	-4.15192	3.3e-05	0.00034964
ENSGALG00000007945_CRYAB	35.3376	3.00007	0.722821	4.1505	3.32e-05	0.00035157
ENSGALG00000016289_DST	18602.4	-1.15682	0.278865	-4.14834	3.35e-05	0.00035466
ENSGALG00000007533_NPEPL1	1373.47	-1.22021	0.294253	-4.14682	3.37e-05	0.00035652
ENSGALG00000013605_CARMIL1	1007.03	-1.26489	0.305015	-4.14698	3.37e-05	0.00035652
ENSGALG00000038920	33.973	6.41447	1.54714	4.14602	3.38e-05	0.00035753
ENSGALG00000010060_PSMA6	793.154	1.33561	0.322165	4.14575	3.39e-05	0.0003577
ENSGALG00000007559_PDSS1	386.166	-1.45428	0.35081	-4.1455	3.39e-05	0.00035784
ENSGALG00000017229_FAT3	568.832	1.56815	0.378571	4.14229	3.44e-05	0.0003625
ENSGALG00000031594	79.3599	-2.14691	0.518301	-4.14221	3.44e-05	0.0003625
ENSGALG00000006776_KLHDC8B	35.5797	3.00309	0.725254	4.14074	3.46e-05	0.00036458
ENSGALG00000006521_TRPM5	1176.59	-1.34385	0.324569	-4.14043	3.47e-05	0.00036483
ENSGALG00000023120_SULT1B1	170.178	-1.57717	0.381006	-4.13949	3.48e-05	0.00036607
ENSGALG00000049887	31.4331	-2.92002	0.706155	-4.1351	3.55e-05	0.00037289
ENSGALG00000029983_ANGPT1	137.798	1.79391	0.433965	4.13377	3.57e-05	0.00037466
ENSGALG00000035057_SLC35B1	1282.09	-1.26696	0.306497	-4.13369	3.57e-05	0.00037466
ENSGALG00000031729_MOB3A	304.699	-1.49579	0.361948	-4.13261	3.59e-05	0.00037594
ENSGALG00000031874_HIST1H101	841.53	-1.50146	0.363329	-4.13251	3.59e-05	0.00037594
ENSGALG00000037402_NOV	696.469	1.63995	0.396849	4.13244	3.59e-05	0.00037594
ENSGALG00000003318_SNRNP35	71.6852	-2.16259	0.52361	-4.13016	3.63e-05	0.00037917
ENSGALG00000019352	392.825	-1.4033	0.33977	-4.13015	3.63e-05	0.00037917
ENSGALG00000020742_PPRC1	103.428	-1.88078	0.455671	-4.12749	3.67e-05	0.00038331
ENSGALG00000000719_RPL22	4860.93	-1.4003	0.339304	-4.12697	3.68e-05	0.00038393
ENSGALG00000003689_PAPSS2	341.815	-1.79353	0.434642	-4.12647	3.68e-05	0.0003845
ENSGALG00000029657	211.266	-1.50392	0.364613	-4.12471	3.71e-05	0.00038718
ENSGALG00000006672_LARP4B	1428.17	-1.21329	0.294216	-4.1238	3.73e-05	0.00038845
ENSGALG00000053990	111.41	-1.77043	0.429405	-4.12299	3.74e-05	0.00038955
ENSGALG00000004553_SGPL1	3645.29	-1.16046	0.281545	-4.12177	3.76e-05	0.00039119
ENSGALG00000009559_IFT80	431.661	1.41172	0.34251	4.12171	3.76e-05	0.00039119
ENSGALG00000029390_C15H12ORF65	243.362	-1.51301	0.367182	-4.1206	3.78e-05	0.00039281
ENSGALG00000054449_SDHC	325.587	-1.54996	0.376233	-4.11967	3.79e-05	0.00039413
ENSGALG00000011847_TTC26	67.561	2.16393	0.525355	4.11899	3.81e-05	0.00039502
ENSGALG00000042227_GNLY	4999.29	-1.37543	0.333972	-4.11841	3.82e-05	0.00039575
ENSGALG00000009152_ATRNL1	352.093	1.45994	0.354602	4.11712	3.84e-05	0.00039769
ENSGALG00000001872_SDF4	2571.98	-1.19322	0.289844	-4.11676	3.84e-05	0.00039804
ENSGALG00000031298_SNRNP200	643.452	-1.45261	0.353002	-4.11502	3.87e-05	0.00040079
ENSGALG00000035818	31.9796	-2.86916	0.697291	-4.11472	3.88e-05	0.00040104
ENSGALG00000041459_DDIT4	73.6314	2.28266	0.554922	4.11349	3.9e-05	0.00040291
ENSGALG00000007659_HYOU1	2785.37	-1.37859	0.335329	-4.11115	3.94e-05	0.00040674
ENSGALG00000015037_EVC	163.673	1.70515	0.414792	4.11086	3.94e-05	0.00040696
ENSGALG00000007547_ABI1	374.7	-1.37484	0.334687	-4.10785	3.99e-05	0.00041204
ENSGALG00000005768_ETV5	113.341	-2.4444	0.595257	-4.10647	4.02e-05	0.00041407
ENSGALG00000054465	45.7639	-2.78114	0.677269	-4.1064	4.02e-05	0.00041407
ENSGALG00000030863	1523.78	-1.43353	0.349135	-4.10594	4.03e-05	0.00041461
ENSGALG00000053173	9.38604	-7.33845	1.78844	-4.10328	4.07e-05	0.00041912
ENSGALG00000005140_RRAD	79.034	2.00619	0.489053	4.10219	4.09e-05	0.00041998
ENSGALG00000014873_GJA1	1241.36	1.26382	0.308062	4.10246	4.09e-05	0.00041998
ENSGALG00000027793_SCN9A	194.813	1.52088	0.370749	4.10218	4.09e-05	0.00041998
ENSGALG00000034216_TK2	132.416	-1.62543	0.396226	-4.10228	4.09e-05	0.00041998
ENSGALG00000034204	14.2589	-4.85193	1.18327	-4.10044	4.12e-05	0.00042286
ENSGALG00000014267_RBM47	1170.88	-1.19661	0.291854	-4.10005	4.13e-05	0.0004233
ENSGALG00000012024_MRTFA	507.565	-1.74962	0.427005	-4.09742	4.18e-05	0.00042784
ENSGALG00000025339	9.72318	-7.29178	1.77973	-4.09712	4.18e-05	0.0004281
ENSGALG00000000311_DOCK5	2504.67	-1.29302	0.31561	-4.09688	4.19e-05	0.00042828
ENSGALG00000003106_TOX2	119.755	-1.94115	0.474028	-4.09502	4.22e-05	0.00043142
ENSGALG00000043167_TNFRSF11B	193.095	1.53884	0.375872	4.09404	4.24e-05	0.00043297
ENSGALG00000034236	26.6306	3.97664	0.971464	4.09345	4.25e-05	0.00043378
ENSGALG00000002904_REEP3	774.219	1.27017	0.310313	4.09319	4.25e-05	0.00043397
ENSGALG00000005789_UQCRC1	2278.84	-1.2196	0.298073	-4.0916	4.28e-05	0.00043668
ENSGALG00000004300_PTDSS2	140.385	1.65888	0.405509	4.09086	4.3e-05	0.00043777
ENSGALG00000016760	167.357	1.64539	0.402311	4.08985	4.32e-05	0.00043939
ENSGALG00000002412_GBA2	2611.76	-1.16598	0.28513	-4.08931	4.33e-05	0.00044013
ENSGALG00000004108	548.332	-1.26204	0.308674	-4.0886	4.34e-05	0.0004409
ENSGALG00000010689_MAGOH	392.312	1.44184	0.352649	4.08859	4.34e-05	0.0004409
ENSGALG00000036196_MTCH2	1149.53	-1.31984	0.323011	-4.08605	4.39e-05	0.00044545
ENSGALG00000027864_NFKBIA	975.103	1.42091	0.347762	4.08585	4.39e-05	0.00044553
ENSGALG00000025858_LUZP1	676.645	-1.40091	0.342915	-4.0853	4.4e-05	0.00044631
ENSGALG00000011715_HSPA2	7374.62	1.4474	0.354362	4.08452	4.42e-05	0.0004475
ENSGALG00000000975_C1orf174	295.545	1.42317	0.34897	4.0782	4.54e-05	0.00045892
ENSGALG00000026661_MSRB3	1539.32	1.46637	0.359546	4.0784	4.53e-05	0.00045892
ENSGALG00000048328	9.30965	-7.2885	1.78717	-4.07824	4.54e-05	0.00045892
ENSGALG00000015617_RPS23	7742.79	1.2021	0.294792	4.07779	4.55e-05	0.00045943
ENSGALG00000040925_RNF215	126.347	-1.63803	0.401895	-4.07577	4.59e-05	0.00046312
ENSGALG00000006253_ILKAP	202.932	-1.45167	0.356222	-4.07519	4.6e-05	0.00046397
ENSGALG00000007701_B3GNT7	107.032	-1.95606	0.480072	-4.07452	4.61e-05	0.00046477
ENSGALG00000046616_CHGB	79.9046	-2.0499	0.503108	-4.07449	4.61e-05	0.00046477
ENSGALG00000003839_GRM2	163.838	-1.88165	0.461855	-4.07412	4.62e-05	0.00046487
ENSGALG00000005034_ACAD9	5640.74	-1.2641	0.310273	-4.07415	4.62e-05	0.00046487
ENSGALG00000046727	121.559	-1.86588	0.458107	-4.07302	4.64e-05	0.00046677
ENSGALG00000015330_PCNP	603.333	-1.40527	0.345343	-4.0692	4.72e-05	0.00047386
ENSGALG00000042474_FOXD2	25.4638	4.95462	1.21759	4.06922	4.72e-05	0.00047386
ENSGALG00000049605	10.5086	-7.47532	1.83741	-4.0684	4.73e-05	0.00047517
ENSGALG00000027641_DUSP14	202.439	1.55637	0.382617	4.06769	4.75e-05	0.00047633
ENSGALG00000042651_KRIT1	678.698	1.25551	0.308764	4.06625	4.78e-05	0.00047895
ENSGALG00000004196	5902.06	-1.34987	0.33216	-4.0639	4.83e-05	0.00048348
ENSGALG00000036955_NEDD8	23.5097	-3.67671	0.904824	-4.06345	4.84e-05	0.00048409
ENSGALG00000013738_OPTN	2009.91	-1.23034	0.303192	-4.05796	4.95e-05	0.0004953
ENSGALG00000028354_METRNL	613.76	1.28697	0.31718	4.05753	4.96e-05	0.00049589
ENSGALG00000040807	49.3609	-2.19118	0.540417	-4.05461	5.02e-05	0.00050177
ENSGALG00000004529_VPS29	497.719	1.31512	0.324446	4.05343	5.05e-05	0.000504
ENSGALG00000043535_RIPK2	194.605	1.60146	0.395167	4.05263	5.06e-05	0.00050539
ENSGALG00000037879_PAF1	341.18	-1.5473	0.381854	-4.05206	5.08e-05	0.00050628
ENSGALG00000048899	159.858	-1.62963	0.402274	-4.05105	5.1e-05	0.00050814
ENSGALG00000008076_TMEM164	350.101	1.43911	0.355278	4.05066	5.11e-05	0.00050867
ENSGALG00000015970_COL9A1	50.715	2.67848	0.661731	4.04769	5.17e-05	0.00051481
ENSGALG00000039032_FJX1	61.3979	2.27051	0.560989	4.04733	5.18e-05	0.00051527
ENSGALG00000052481	43.3881	2.67258	0.660446	4.04664	5.2e-05	0.00051646
ENSGALG00000003731_FBXO42	271.552	-1.53084	0.378541	-4.04405	5.25e-05	0.00052185
ENSGALG00000051829	54.1167	2.31761	0.573265	4.04283	5.28e-05	0.00052424
ENSGALG00000023682_GTF2H3	214.295	1.45999	0.361164	4.04247	5.29e-05	0.00052471
ENSGALG00000050725_SVBP	1404.8	-1.25052	0.309411	-4.0416	5.31e-05	0.00052631
ENSGALG00000003820_ARPC3	693.717	-1.25115	0.309633	-4.04075	5.33e-05	0.00052788
ENSGALG00000003855_SRC	192.395	-1.80528	0.446913	-4.03944	5.36e-05	0.00053049
ENSGALG00000049067	66.0117	2.1397	0.529922	4.03776	5.4e-05	0.00053395
ENSGALG00000005662_AMPD3	207.536	1.6407	0.406471	4.03646	5.43e-05	0.00053658
ENSGALG00000014261_UCHL1	199.543	1.82947	0.453305	4.03584	5.44e-05	0.0005373
ENSGALG00000038041_PHF14	602.546	-1.31838	0.326667	-4.03584	5.44e-05	0.0005373
ENSGALG00000006779_PDZD3	586.763	-1.32454	0.32822	-4.03551	5.45e-05	0.0005377
ENSGALG00000016227_GPR34	694.766	1.24705	0.309162	4.03364	5.49e-05	0.00054165
ENSGALG00000013037_BCL2L13	355.382	-1.3351	0.331117	-4.03211	5.53e-05	0.00054484
ENSGALG00000002430_SMN	330.446	-1.49602	0.371129	-4.03101	5.55e-05	0.00054705
ENSGALG00000010163_LGR5	270.413	1.55938	0.386955	4.02987	5.58e-05	0.00054934
ENSGALG00000002621_SLC25A42	279.332	-1.46319	0.36324	-4.02816	5.62e-05	0.00055299
ENSGALG00000026470	2527.82	-1.22288	0.30367	-4.02701	5.65e-05	0.00055534
ENSGALG00000000150_RPL9	8976.15	1.26436	0.314159	4.02457	5.71e-05	0.00056077
ENSGALG00000016261_CYBB	278.622	1.45294	0.361096	4.02369	5.73e-05	0.00056216
ENSGALG00000049001_ANKRD39	215.724	1.52419	0.3788	4.02373	5.73e-05	0.00056216
ENSGALG00000031958_NABP2	26.7064	-3.23743	0.80523	-4.0205	5.81e-05	0.00056944
ENSGALG00000035187_FHL3	807.138	1.27853	0.318149	4.01865	5.85e-05	0.00057357
ENSGALG00000012072	3734.62	-1.21347	0.301991	-4.01821	5.86e-05	0.00057426
ENSGALG00000008369_ABCC5	1600.84	-1.16832	0.290797	-4.01765	5.88e-05	0.00057526
ENSGALG00000053388	44.7778	2.49968	0.622391	4.01625	5.91e-05	0.00057832
ENSGALG00000005610_SLC44A3	601.414	1.25544	0.312697	4.01489	5.95e-05	0.0005813
ENSGALG00000032190_MICAL1	830.477	-1.27237	0.317029	-4.01343	5.98e-05	0.00058453
ENSGALG00000008127_SPI1	539.446	1.28254	0.31963	4.01259	6.01e-05	0.00058624
ENSGALG00000002363_HSPA9	3420.96	-1.21822	0.303631	-4.01219	6.02e-05	0.00058666
ENSGALG00000010053_PTPRF	9706.12	-1.63727	0.408082	-4.01212	6.02e-05	0.00058666
ENSGALG00000033171_TGM4	355.741	-1.62581	0.405604	-4.00837	6.11e-05	0.00059566
ENSGALG00000027868_AMER2	15.4766	-6.60381	1.64761	-4.00812	6.12e-05	0.00059591
ENSGALG00000000349_PSMC5	1251.04	-1.29693	0.323602	-4.00779	6.13e-05	0.00059637
ENSGALG00000050564	139.515	1.82806	0.456164	4.00746	6.14e-05	0.0005968
ENSGALG00000047359_MAF1	1107.75	-1.34682	0.336245	-4.00548	6.19e-05	0.00060144
ENSGALG00000007666_KCNIP2	49.9436	2.90268	0.724722	4.00523	6.2e-05	0.00060171
ENSGALG00000015450_RAB2A	2875.06	-1.13905	0.284453	-4.00434	6.22e-05	0.00060359
ENSGALG00000016448_KCNF1	92.9096	1.92602	0.481204	4.00249	6.27e-05	0.00060794
ENSGALG00000015436_SDCBP	1945.81	1.1889	0.29718	4.00062	6.32e-05	0.000612
ENSGALG00000026392_PIPOX	446.713	-1.63338	0.408282	-4.00061	6.32e-05	0.000612
ENSGALG00000020386_BDKRB1	127.185	1.68329	0.420804	4.00019	6.33e-05	0.00061272
ENSGALG00000006871_SLCO3A1	115.565	-1.75035	0.437693	-3.99903	6.36e-05	0.00061532
ENSGALG00000043092_MYH9	37068	-1.11457	0.27897	-3.9953	6.46e-05	0.0006247
ENSGALG00000016164_ABCG1	142.52	1.64418	0.411581	3.99479	6.48e-05	0.00062563
ENSGALG00000032059	78.837	-10.4094	2.6065	-3.99362	6.51e-05	0.00062833
ENSGALG00000008585_SMC3	1729.51	-1.25988	0.315501	-3.99327	6.52e-05	0.00062848
ENSGALG00000030843_COPS5	481.185	-1.41616	0.354628	-3.99336	6.51e-05	0.00062848
ENSGALG00000039008	336.126	1.35307	0.33886	3.993	6.52e-05	0.0006288
ENSGALG00000002479_MAT1A	73.9296	-2.0198	0.505875	-3.99269	6.53e-05	0.00062921
ENSGALG00000002383_CD72AG	26.2971	4.99865	1.25224	3.99176	6.56e-05	0.00063128
ENSGALG00000037773_ST3GAL1	67.4696	2.06223	0.516809	3.99031	6.6e-05	0.00063477
ENSGALG00000010785_ACOT11	1284.4	-1.45091	0.363732	-3.98896	6.64e-05	0.00063797
ENSGALG00000040626_NDUFA2	219.651	1.51038	0.378837	3.98688	6.69e-05	0.00064319
ENSGALG00000006794	909.02	-1.32008	0.331127	-3.98661	6.7e-05	0.00064336
ENSGALG00000012944_DENND5B	725.314	-1.427	0.357956	-3.98652	6.71e-05	0.00064336
ENSGALG00000012874_DENND11	639.288	-1.25937	0.316019	-3.9851	6.75e-05	0.00064647
ENSGALG00000017156_DDX10	548.497	-1.40466	0.35248	-3.98507	6.75e-05	0.00064647
ENSGALG00000015388_PRDM1	162.032	-1.62308	0.407349	-3.9845	6.76e-05	0.00064763
ENSGALG00000009236_AGPS	925.955	1.23598	0.310298	3.98319	6.8e-05	0.00065038
ENSGALG00000036805	323.208	-1.44081	0.361711	-3.98331	6.8e-05	0.00065038
ENSGALG00000006018	127.777	1.89403	0.475572	3.98263	6.82e-05	0.00065152
ENSGALG00000004856_NUP62	158.18	-1.60061	0.402034	-3.98127	6.85e-05	0.00065483
ENSGALG00000029444_CLK2	252.898	-1.43762	0.36112	-3.98101	6.86e-05	0.00065516
ENSGALG00000011377_METAP2	1038.81	-1.20959	0.303951	-3.97957	6.9e-05	0.00065871
ENSGALG00000042794_ZFAND1	167.806	1.54127	0.387517	3.97729	6.97e-05	0.00066464
ENSGALG00000009044	492.422	1.2753	0.320663	3.97709	6.98e-05	0.0006648
ENSGALG00000049288	145.057	-1.59758	0.401787	-3.9762	7e-05	0.00066687
ENSGALG00000030759_SRPRA	1567.05	-1.19424	0.300467	-3.97461	7.05e-05	0.00067091
ENSGALG00000009312_RPL22L1	718.178	1.38537	0.34865	3.97354	7.08e-05	0.00067352
ENSGALG00000015306_OSTM1	394.9	1.29491	0.325946	3.97278	7.1e-05	0.00067524
ENSGALG00000054523_LZTFL1	155.936	1.83056	0.460932	3.97144	7.14e-05	0.00067862
ENSGALG00000032746_ENPP2	342.585	1.38081	0.347896	3.96902	7.22e-05	0.00068513
ENSGALG00000039269_RNF213	3110.08	-1.28078	0.322709	-3.96883	7.22e-05	0.00068525
ENSGALG00000040492_LONP1	1100.54	-1.22257	0.308075	-3.96841	7.24e-05	0.00068602
ENSGALG00000046788	14.9113	-4.15811	1.04794	-3.9679	7.25e-05	0.00068707
ENSGALG00000035236_BCAP31	1128.14	-1.34051	0.337864	-3.96761	7.26e-05	0.00068748
ENSGALG00000029909_DHDDS	1033.04	-1.1843	0.298509	-3.96739	7.27e-05	0.00068769
ENSGALG00000009252_PLD1	2128.47	-1.3774	0.347237	-3.96674	7.29e-05	0.00068912
ENSGALG00000003045_E2F1	222.658	-1.59842	0.403062	-3.9657	7.32e-05	0.00069172
ENSGALG00000008595_RTF1	727.085	-1.24197	0.313305	-3.96408	7.37e-05	0.00069599
ENSGALG00000001943_RHBDF2	143.093	-1.53246	0.386729	-3.96262	7.41e-05	0.00069982
ENSGALG00000021451	1136.95	-1.50946	0.381042	-3.96141	7.45e-05	0.00070297
ENSGALG00000013828_GALM	774.551	-1.29161	0.326161	-3.96004	7.49e-05	0.00070561
ENSGALG00000031105_SLC4A4	2332	-1.16502	0.294202	-3.95992	7.5e-05	0.00070561
ENSGALG00000037946_RBM4	613.21	-1.35809	0.342926	-3.9603	7.49e-05	0.00070561
ENSGALG00000046826_GYS1	244.914	-1.38798	0.350491	-3.96009	7.49e-05	0.00070561
ENSGALG00000029416_TRPC6	109.148	1.94169	0.490381	3.95956	7.51e-05	0.00070623
ENSGALG00000016675_PAQR8	133.178	1.61808	0.408711	3.95898	7.53e-05	0.00070753
ENSGALG00000043610	641.891	-1.84568	0.466267	-3.95842	7.54e-05	0.00070874
ENSGALG00000010533_ELAVL4	123.057	1.69466	0.428207	3.95756	7.57e-05	0.00071085
ENSGALG00000005021_RAB43	971.426	-1.44554	0.365443	-3.95557	7.64e-05	0.00071634
ENSGALG00000035049	63.7158	-1.95833	0.495109	-3.95536	7.64e-05	0.00071654
ENSGALG00000006076_RASGEF1C	272.259	-1.41789	0.358607	-3.95388	7.69e-05	0.00072055
ENSGALG00000016967_ENOX1	198.043	1.54125	0.389843	3.95352	7.7e-05	0.0007212
ENSGALG00000009451_PPID	635.262	-1.22597	0.310227	-3.95184	7.76e-05	0.00072581
ENSGALG00000008661_CYR61	174.002	1.76496	0.44667	3.95136	7.77e-05	0.00072682
ENSGALG00000051049	374.214	-1.3927	0.352472	-3.95122	7.78e-05	0.00072682
ENSGALG00000003539_KIAA1522	1025.69	-1.61711	0.409422	-3.94972	7.82e-05	0.00073093
ENSGALG00000050169	25.1578	3.94825	1.00033	3.94694	7.92e-05	0.00073901
ENSGALG00000024628	14.5963	-5.23081	1.32567	-3.94578	7.95e-05	0.00074215
ENSGALG00000033090_VDR	681.531	-1.30961	0.331943	-3.94529	7.97e-05	0.00074322
ENSGALG00000013377_LMBRD2	1103.1	-1.25352	0.317866	-3.94354	8.03e-05	0.00074821
ENSGALG00000051810	14.1034	-4.38785	1.11316	-3.94179	8.09e-05	0.00075321
ENSGALG00000003682_ARL6IP4	361.059	-1.33906	0.339857	-3.94005	8.15e-05	0.00075823
ENSGALG00000037332_IGFBP7	4248.36	1.23047	0.312345	3.93945	8.17e-05	0.00075967
ENSGALG00000005435	8.40071	-7.17564	1.82175	-3.93886	8.19e-05	0.00076107
ENSGALG00000030379_LMBR1	224.124	1.4142	0.359483	3.93399	8.35e-05	0.00077621
ENSGALG00000010285_MRPL14	241.85	1.50365	0.38226	3.93359	8.37e-05	0.00077702
ENSGALG00000015598_RASGRF2	176.156	-1.47204	0.37428	-3.933	8.39e-05	0.00077846
ENSGALG00000014922_ROCK1	3417.96	-1.13333	0.288286	-3.93126	8.45e-05	0.00078363
ENSGALG00000033880_CRISPLD1	214.772	1.55091	0.39483	3.92804	8.56e-05	0.0007937
ENSGALG00000040109_LARP1	1930.26	-1.37095	0.349039	-3.92778	8.57e-05	0.00079409
ENSGALG00000011400_USP44	636.123	-1.31902	0.335853	-3.92737	8.59e-05	0.00079496
ENSGALG00000013726_PAICS	448.983	1.51538	0.385897	3.92689	8.61e-05	0.00079577
ENSGALG00000026547_TPGS2	213.427	-1.40252	0.357178	-3.92667	8.61e-05	0.00079577
ENSGALG00000030998_MTA2	219.67	-1.49273	0.380161	-3.92658	8.62e-05	0.00079577
ENSGALG00000031424_SDC2	1309	1.33131	0.339053	3.92654	8.62e-05	0.00079577
ENSGALG00000021235_NPY6R	22.9861	-3.24134	0.825554	-3.92626	8.63e-05	0.00079621
ENSGALG00000041365_SALL4	94.9945	-1.70956	0.43554	-3.92515	8.67e-05	0.00079941
ENSGALG00000004562_HVCN1	541.6	1.66348	0.423842	3.92477	8.68e-05	0.00080021
ENSGALG00000032783_SUMO3	1111.5	-1.16788	0.297677	-3.92329	8.73e-05	0.00080463
ENSGALG00000039134	63.8393	-2.24667	0.572925	-3.92141	8.8e-05	0.00081027
ENSGALG00000042941_MRPL9	629.87	-1.4038	0.357993	-3.92132	8.81e-05	0.00081027
ENSGALG00000001833_PRKRIP1	165.774	-1.45827	0.372141	-3.9186	8.91e-05	0.00081897
ENSGALG00000013060_ADCY2	134.192	1.70323	0.434776	3.91749	8.95e-05	0.00082226
ENSGALG00000047398	1780.07	-1.25986	0.321859	-3.91432	9.07e-05	0.00083263
ENSGALG00000028600_PPIA	5497.58	-1.128	0.288191	-3.91408	9.08e-05	0.00083296
ENSGALG00000008187_EIF3J	1387.32	-1.16901	0.298701	-3.91363	9.09e-05	0.00083398
ENSGALG00000017171_CWF19L2	238.267	-1.48578	0.379714	-3.91289	9.12e-05	0.00083604
ENSGALG00000006919_POF1B	350.167	-1.34923	0.344882	-3.91214	9.15e-05	0.00083815
ENSGALG00000007418_CD3D	432.396	1.26664	0.32385	3.91118	9.18e-05	0.00084097
ENSGALG00000011200_THBS2	539.348	1.33553	0.341487	3.91091	9.19e-05	0.00084141
ENSGALG00000004285_HNF4A	857.421	-1.39273	0.356208	-3.90989	9.23e-05	0.00084448
ENSGALG00000014509_BST1	395.253	-1.40195	0.358591	-3.9096	9.25e-05	0.00084449
ENSGALG00000030070_QDPR	730.014	-1.17671	0.300977	-3.90963	9.24e-05	0.00084449
ENSGALG00000007090_CPN1	149.483	1.56935	0.401449	3.90923	9.26e-05	0.00084526
ENSGALG00000011642_ANKRD17	3199.76	-1.15381	0.295202	-3.90856	9.28e-05	0.0008471
ENSGALG00000028570_C6orf132	380.441	-1.58523	0.405851	-3.90594	9.39e-05	0.00085582
ENSGALG00000010835_DTX4	457.205	1.30206	0.333381	3.90561	9.4e-05	0.00085648
ENSGALG00000008077	54.5517	2.26615	0.580566	3.90335	9.49e-05	0.00086349
ENSGALG00000008318_SLK	2372.27	-1.11688	0.286124	-3.90348	9.48e-05	0.00086349
ENSGALG00000009365_CYP51A1	634.166	-1.43099	0.366654	-3.90283	9.51e-05	0.0008644
ENSGALG00000016205_PDXK	1487.37	-1.27514	0.326728	-3.90277	9.51e-05	0.0008644
ENSGALG00000016592_PRPS2	39.1041	2.60396	0.667227	3.90266	9.51e-05	0.0008644
ENSGALG00000008270_CALHM2	82.1252	2.12555	0.544689	3.90231	9.53e-05	0.00086512
ENSGALG00000012356_TAB2	754.149	-1.17773	0.302099	-3.89848	9.68e-05	0.00087839
ENSGALG00000015301_LNPEP	2054.25	1.11842	0.286952	3.89759	9.72e-05	0.0008811
ENSGALG00000048798	14.2852	-6.48223	1.66344	-3.8969	9.74e-05	0.00088311
ENSGALG00000037983_LUC7L	533.938	-1.25435	0.321911	-3.89657	9.76e-05	0.00088379
ENSGALG00000003733_LIFR	576.192	1.27197	0.326503	3.89574	9.79e-05	0.00088628
ENSGALG00000015977_SMOX	565.951	-1.43766	0.36905	-3.89558	9.8e-05	0.00088633
ENSGALG00000012420_CG-1B	216.479	1.63216	0.419297	3.89261	9.92e-05	0.00089662
ENSGALG00000039264_SLA	198.766	1.54901	0.397947	3.89249	9.92e-05	0.00089662
ENSGALG00000054306_SRXN1	601.762	-1.45835	0.374672	-3.89233	9.93e-05	0.00089668
ENSGALG00000013177_BCAT1	194.664	1.45917	0.375135	3.88972	0.00010036	0.00090585
ENSGALG00000051534	197.193	1.4983	0.385528	3.88635	0.00010176	0.00091797
ENSGALG00000008567	79.3008	1.93707	0.498484	3.88592	0.00010194	0.00091904
ENSGALG00000043681_DAPP1	111.785	1.74249	0.448438	3.88568	0.00010204	0.00091943
ENSGALG00000009633_KATNBL1	407.787	1.33272	0.343098	3.88439	0.00010259	0.00092379
ENSGALG00000026293_C3orf33	38.754	-2.41939	0.6231	-3.88283	0.00010325	0.00092916
ENSGALG00000001000_HSPA5	12182.9	-1.26848	0.326726	-3.88241	0.00010343	0.00093024
ENSGALG00000036443_FUT8	984.342	-1.17815	0.303577	-3.88088	0.00010408	0.00093553
ENSGALG00000034511	223.711	-1.375	0.354425	-3.87952	0.00010466	0.00094022
ENSGALG00000038286_AP4E1	377.823	1.26722	0.326679	3.87908	0.00010485	0.00094137
ENSGALG00000007716_SLC37A4	946.635	-1.4354	0.370229	-3.87707	0.00010572	0.00094863
ENSGALG00000004438_ARSB	782.633	-1.28515	0.331518	-3.87657	0.00010594	0.00095001
ENSGALG00000009392_TLR5	128.791	1.662	0.428852	3.87546	0.00010642	0.0009538
ENSGALG00000028982_CMPK2	385.318	-1.52827	0.394501	-3.87393	0.0001071	0.00095926
ENSGALG00000013189_LPCAT1	302.598	1.3442	0.347004	3.87373	0.00010718	0.00095949
ENSGALG00000014695_CLCN1	15.2727	-3.90416	1.00852	-3.87119	0.0001083	0.00096894
ENSGALG00000027435_MED21	162.336	1.58058	0.408547	3.86878	0.00010938	0.000978
ENSGALG00000002144_THRAP3	2906.76	-1.10373	0.285349	-3.86799	0.00010974	0.00098061
ENSGALG00000015746_JAM2	207.837	1.47111	0.380348	3.8678	0.00010982	0.00098078
ENSGALG00000030710	64.0466	2.02796	0.524423	3.86704	0.00011017	0.00098328
ENSGALG00000051458	36.7383	-2.36086	0.610609	-3.8664	0.00011045	0.00098528
ENSGALG00000050166	117.195	-1.71919	0.444945	-3.86383	0.00011162	0.00099487
ENSGALG00000054143	37.5999	-2.39464	0.61977	-3.86375	0.00011166	0.00099487
ENSGALG00000003003_CCL20	265.708	2.18033	0.56436	3.86336	0.00011184	0.00099586
ENSGALG00000037327_DCAF17	69.1806	2.14582	0.555745	3.86116	0.00011285	0.00100432
ENSGALG00000030550_ATP2B1	5280.87	-1.17689	0.304884	-3.86013	0.00011333	0.00100795
ENSGALG00000051598	3022.12	1.11159	0.288021	3.8594	0.00011367	0.0010104
ENSGALG00000047203	437.789	-1.38556	0.359043	-3.85903	0.00011384	0.00101132
ENSGALG00000002452_AQP3	215.767	2.10066	0.544495	3.858	0.00011432	0.00101498
ENSGALG00000038207	67.7472	-1.95178	0.506661	-3.85224	0.00011704	0.00103858
ENSGALG00000014836_LPIN2	2059.46	-1.22242	0.317405	-3.85129	0.00011749	0.00104198
ENSGALG00000006355_SPTY2D1	545.816	-1.18808	0.308526	-3.85084	0.00011771	0.00104332
ENSGALG00000015326_CLTA	1804.06	-1.2843	0.333572	-3.85014	0.00011805	0.00104567
ENSGALG00000006826_KLHL25	131.758	-1.59188	0.413602	-3.84882	0.00011869	0.00105072
ENSGALG00000043002_TOMM6	370.4	1.28293	0.333424	3.84775	0.00011921	0.00105472
ENSGALG00000007619_UBALD1	544.564	-1.56377	0.406455	-3.84734	0.00011941	0.00105585
ENSGALG00000049272	30.5581	-2.73407	0.711108	-3.84481	0.00012065	0.00106622
ENSGALG00000011266_PPM1K	230.679	1.39189	0.362044	3.84453	0.00012078	0.00106678
ENSGALG00000054753	662.586	-1.21893	0.317132	-3.84362	0.00012123	0.00107015
ENSGALG00000014719	139.199	1.6233	0.422409	3.84297	0.00012156	0.00107236
ENSGALG00000015195_RPS15	5348.61	1.21782	0.317002	3.84168	0.0001222	0.0010774
ENSGALG00000001916_SLIT3	601	1.38497	0.360568	3.84108	0.0001225	0.00107878
ENSGALG00000017389_SIX4	131.592	-1.68447	0.438525	-3.84121	0.00012243	0.00107878
ENSGALG00000046840	7.83515	-7.06651	1.84006	-3.84037	0.00012285	0.00108125
ENSGALG00000042939_HMBS	576.966	-1.17921	0.307125	-3.8395	0.00012329	0.0010845
ENSGALG00000054104	7.87178	-7.06482	1.84044	-3.83866	0.00012371	0.00108758
ENSGALG00000038146	532.866	-1.36097	0.354621	-3.83781	0.00012414	0.00109017
ENSGALG00000049883	25.4632	-2.82021	0.734854	-3.83779	0.00012415	0.00109017
ENSGALG00000016320_FBXO9	1021.99	1.22961	0.320426	3.83743	0.00012433	0.00109052
ENSGALG00000049348	83.5802	-1.78214	0.464402	-3.8375	0.00012429	0.00109052
ENSGALG00000033118_FAM83H	573.245	-1.28984	0.336309	-3.83526	0.00012543	0.00109953
ENSGALG00000002695_SLC15A4	407.469	1.24385	0.324697	3.83081	0.00012772	0.001119
ENSGALG00000015910_CD109	472.491	1.56797	0.409383	3.83007	0.00012811	0.00112173
ENSGALG00000046369	73.7318	1.90228	0.496698	3.82984	0.00012823	0.0011221
ENSGALG00000047713_QPRT	317.952	-7.73216	2.01995	-3.8279	0.00012924	0.00113034
ENSGALG00000032282_CALB1	8078.09	-6.73162	1.75917	-3.82658	0.00012994	0.00113514
ENSGALG00000033498	1043.27	-1.41499	0.369781	-3.82657	0.00012994	0.00113514
ENSGALG00000015603_ZCCHC9	326.129	-1.35827	0.355265	-3.82326	0.0001317	0.00114987
ENSGALG00000051992_CYP2J23	1153.37	-1.30372	0.341041	-3.82278	0.00013196	0.00115145
ENSGALG00000042741_GRK2	430.488	-1.2828	0.335614	-3.82224	0.00013225	0.0011533
ENSGALG00000034163_CRTAP	344.053	1.38627	0.36272	3.82189	0.00013243	0.00115428
ENSGALG00000006068_TNRC6A	1456.26	-1.13797	0.297809	-3.82113	0.00013284	0.00115719
ENSGALG00000012584_MARCH7	1005.55	1.13716	0.297618	3.82087	0.00013298	0.00115738
ENSGALG00000040741_DNM2	1355.08	-1.45847	0.381719	-3.8208	0.00013302	0.00115738
ENSGALG00000032143_CRISPLD2	314.33	1.31316	0.343736	3.82025	0.00013332	0.00115931
ENSGALG00000034821_LMAN1L	1740.78	-1.11933	0.293061	-3.81943	0.00013376	0.00116251
ENSGALG00000035094_CDH17	7510.7	-1.14992	0.301389	-3.81541	0.00013596	0.00118093
ENSGALG00000041845_ZNF692	26.0236	-2.96604	0.777482	-3.81492	0.00013622	0.00118258
ENSGALG00000040181_EDC3	353.838	-1.33099	0.348993	-3.8138	0.00013685	0.0011873
ENSGALG00000014977_GSK3B	654.126	-1.24695	0.326979	-3.81356	0.00013698	0.00118779
ENSGALG00000002830_NUDT3	167.517	-1.41501	0.371074	-3.81328	0.00013714	0.00118846
ENSGALG00000036500	305.135	-1.55257	0.407173	-3.81303	0.00013727	0.00118859
ENSGALG00000036836_SOSTDC1	134.909	-1.54088	0.404116	-3.81297	0.00013731	0.00118859
ENSGALG00000048766	13.3124	-6.39405	1.67719	-3.81236	0.00013765	0.00119086
ENSGALG00000012237_POLE2	310.471	1.47721	0.387905	3.80818	0.00013999	0.00121047
ENSGALG00000014978_IQGAP2	5769.62	-1.06858	0.280654	-3.80746	0.0001404	0.00121328
ENSGALG00000002500_GMPPB	908.61	-1.21054	0.317966	-3.80715	0.00014058	0.00121346
ENSGALG00000039472_SART3	615.03	-1.17963	0.30984	-3.80722	0.00014054	0.00121346
ENSGALG00000015554_SORCS2	193.94	1.49543	0.392864	3.80648	0.00014096	0.00121603
ENSGALG00000002860_MLN	257.345	-1.45705	0.382906	-3.80525	0.00014166	0.00122143
ENSGALG00000048418	34.8732	2.75696	0.724733	3.8041	0.00014232	0.0012264
ENSGALG00000041611	558.55	1.1921	0.313658	3.80065	0.00014432	0.00124293
ENSGALG00000011301_LRRC40	177.817	1.43319	0.377262	3.79893	0.00014532	0.00125084
ENSGALG00000012894_CHRM2	110.911	2.03083	0.534926	3.79647	0.00014677	0.00126259
ENSGALG00000011625_MRPL18	297.061	-1.30226	0.343039	-3.79624	0.00014691	0.00126308
ENSGALG00000037856_CHL1	296.965	1.49511	0.393867	3.79598	0.00014706	0.00126366
ENSGALG00000017276	1352.09	-1.20789	0.31823	-3.79566	0.00014725	0.00126462
ENSGALG00000017038_PROSER1	88.5782	-1.88487	0.496655	-3.79513	0.00014757	0.0012666
ENSGALG00000013775_CDH19	122.04	1.86747	0.492089	3.79498	0.00014765	0.00126663
ENSGALG00000053358	334.886	-1.25783	0.331538	-3.79394	0.00014828	0.00127126
ENSGALG00000037519_C1orf35	62.8853	-2.02776	0.534553	-3.79337	0.00014862	0.00127345
ENSGALG00000024970_7SK	15.8863	-6.31298	1.66466	-3.79235	0.00014923	0.00127763
ENSGALG00000042330_PPP1R9B	2988.49	-1.0888	0.287109	-3.79228	0.00014927	0.00127763
ENSGALG00000015706_LETM1	1727.96	-1.18559	0.312736	-3.79101	0.00015004	0.00128344
ENSGALG00000019215_ARL6	85.6057	1.77997	0.469552	3.79078	0.00015018	0.00128387
ENSGALG00000052645	18.7974	-3.27886	0.864986	-3.79065	0.00015025	0.00128387
ENSGALG00000048306	13.1215	-6.36622	1.67971	-3.79008	0.0001506	0.00128609
ENSGALG00000016996_ITM2B	4113.18	-1.38251	0.365023	-3.78746	0.00015219	0.00129898
ENSGALG00000001126_CHAF1A	422.125	-1.23217	0.325389	-3.78678	0.00015261	0.00130183
ENSGALG00000013406_EOGT	320.496	1.4015	0.370134	3.78648	0.0001528	0.00130267
ENSGALG00000006777_MRPS11	544.244	1.249	0.329886	3.78616	0.000153	0.0013029
ENSGALG00000053575_DAZAP2	188.33	-1.72081	0.454492	-3.78624	0.00015295	0.0013029
ENSGALG00000015112_ZNF521	428.311	1.39984	0.37012	3.78212	0.0001555	0.0013235
ENSGALG00000005947_MYD88	1111.75	1.11319	0.294477	3.78022	0.00015669	0.00133285
ENSGALG00000051144_EVI5L	483.91	-1.27539	0.337412	-3.77993	0.00015687	0.00133369
ENSGALG00000003014_CHRNA3	84.2289	1.83645	0.485869	3.77971	0.00015701	0.0013341
ENSGALG00000001655_SPCS1	696.227	-1.4245	0.376902	-3.77949	0.00015715	0.00133452
ENSGALG00000001765_CAAP1	324.594	-1.27707	0.338156	-3.77658	0.000159	0.0013495
ENSGALG00000009992_ARHGAP5	3148.99	-1.11778	0.295997	-3.77633	0.00015916	0.00134997
ENSGALG00000015721_SVEP1	1796.04	1.33583	0.35375	3.77621	0.00015923	0.00134997
ENSGALG00000045936_FAM83F	858.733	-1.53708	0.407097	-3.77572	0.00015955	0.00135188
ENSGALG00000008606_NDUFS1	2313.94	-1.12326	0.297599	-3.77439	0.0001604	0.00135762
ENSGALG00000023089_SSBP2	428.941	1.30605	0.346021	3.77448	0.00016034	0.00135762
ENSGALG00000008779_ACTR2	2479.7	-1.18361	0.313775	-3.77215	0.00016185	0.00136908
ENSGALG00000015416_SDR16C5	5629.81	-1.22141	0.323877	-3.77121	0.00016246	0.00137349
ENSGALG00000036456_TRIB1	190.95	-1.62826	0.431786	-3.77099	0.0001626	0.00137395
ENSGALG00000052629_TWSG1	804.453	1.18635	0.314677	3.77007	0.0001632	0.00137823
ENSGALG00000050763_PBXIP1	555.802	-1.43357	0.380279	-3.76979	0.00016339	0.00137905
ENSGALG00000023437_NQO1	1462.46	-1.16167	0.308196	-3.76927	0.00016373	0.00138115
ENSGALG00000010411_RNF13	2202.57	-1.10524	0.293241	-3.76905	0.00016387	0.00138161
ENSGALG00000028949_CORO6	186.98	1.5323	0.406656	3.76806	0.00016452	0.00138633
ENSGALG00000015691_SMC2	952.3	-1.56876	0.416366	-3.76774	0.00016473	0.00138657
ENSGALG00000032382_UBA5	119.168	-1.58354	0.420279	-3.76784	0.00016467	0.00138657
ENSGALG00000015669_PTBP3	615.676	-1.24823	0.331444	-3.76605	0.00016585	0.00139522
ENSGALG00000011922_PCNX4	260.501	1.34391	0.356929	3.7652	0.00016642	0.00139917
ENSGALG00000027232_C1QTNF2	141.07	1.58898	0.422093	3.76452	0.00016687	0.00140146
ENSGALG00000028664_CKS1B	81.6436	-1.80736	0.480103	-3.76452	0.00016687	0.00140146
ENSGALG00000000660_CYB5B	826.403	-1.19766	0.318179	-3.7641	0.00016715	0.00140304
ENSGALG00000006743_YWHAH	1114.79	1.1882	0.315697	3.76375	0.00016739	0.00140424
ENSGALG00000026605_BAG2	658.918	1.43247	0.38075	3.76224	0.0001684	0.00141194
ENSGALG00000041564	1314.55	-1.15563	0.307215	-3.76164	0.00016881	0.00141459
ENSGALG00000006547_PROCR	73.334	-1.7909	0.476151	-3.7612	0.0001691	0.00141614
ENSGALG00000010957_USP1	947.332	-1.11241	0.295767	-3.76109	0.00016918	0.00141614
ENSGALG00000016358_PTCHD1	104.47	1.71801	0.456805	3.76093	0.00016928	0.00141623
ENSGALG00000002647_PLS1	3662.13	-1.15304	0.306711	-3.75936	0.00017035	0.00142437
ENSGALG00000004257_TSPAN15	675.551	-1.38894	0.369499	-3.75898	0.0001706	0.00142573
ENSGALG00000005522_DYNLL2	592.541	1.23525	0.328665	3.7584	0.000171	0.00142827
ENSGALG00000004150_MYO1E	2029.14	-1.20039	0.319567	-3.75631	0.00017244	0.00143945
ENSGALG00000004943_SS18L2	112.882	1.78887	0.476365	3.75526	0.00017317	0.00144455
ENSGALG00000014226_KIAA0930	292.301	-1.40305	0.373633	-3.75515	0.00017324	0.00144455
ENSGALG00000002764_ATP1B3	771.443	1.20764	0.321698	3.75395	0.00017407	0.0014507
ENSGALG00000008818_IDH1	5183.86	-1.17553	0.313174	-3.75362	0.0001743	0.00145185
ENSGALG00000004798_MPRIP	695.909	-1.37963	0.367581	-3.75327	0.00017455	0.00145308
ENSGALG00000032468_SNX17	915.359	-1.28756	0.343118	-3.75252	0.00017507	0.00145663
ENSGALG00000005601	64.7814	2.03565	0.542515	3.75224	0.00017526	0.00145742
ENSGALG00000035853_SCRN2	275.998	-1.29175	0.3443	-3.75181	0.00017557	0.00145918
ENSGALG00000047662_NR1D1	56.4828	-2.36068	0.629395	-3.75071	0.00017633	0.00146474
ENSGALG00000012456_RAC2	330.755	-1.5466	0.412485	-3.74948	0.0001772	0.00147115
ENSGALG00000012263_NEMF	922.153	-1.19789	0.319966	-3.74381	0.00018125	0.00150398
ENSGALG00000007641_LDB1	300.012	-1.78337	0.476456	-3.74299	0.00018184	0.00150804
ENSGALG00000017302	433.304	-1.43343	0.382997	-3.74266	0.00018208	0.0015092
ENSGALG00000005209_AQP1	497.339	1.50561	0.402441	3.7412	0.00018314	0.00151717
ENSGALG00000010561_GPATCH11	226.369	-1.42287	0.380384	-3.74061	0.00018357	0.00151994
ENSGALG00000039573	912.365	-1.4692	0.392802	-3.74031	0.0001838	0.00152094
ENSGALG00000002632_CALCRL	293.894	1.40748	0.376611	3.73722	0.00018607	0.00153806
ENSGALG00000033989_SLC39A14	1277	-1.2059	0.322669	-3.73726	0.00018604	0.00153806
ENSGALG00000027632_ACYP2	110.679	1.63302	0.437225	3.73497	0.00018774	0.00155068
ENSGALG00000045607_CXCL13	24.8953	5.98561	1.60262	3.73489	0.0001878	0.00155068
ENSGALG00000002205_FBRSL1	530.177	-1.56318	0.418573	-3.73454	0.00018806	0.00155201
ENSGALG00000001791	58.3036	2.05401	0.550127	3.7337	0.00018869	0.0015555
ENSGALG00000002792_SPDEF	340.903	-1.38752	0.371612	-3.73378	0.00018862	0.0015555
ENSGALG00000029789_PPP1R2	693.104	-1.17422	0.314656	-3.73175	0.00019016	0.00156675
ENSGALG00000009689_PON1	65.7319	2.0043	0.537592	3.72829	0.00019278	0.00158667
ENSGALG00000046261	94.274	1.68392	0.45166	3.7283	0.00019278	0.00158667
ENSGALG00000047636	190.558	1.53718	0.412492	3.72658	0.0001941	0.00159663
ENSGALG00000011499_SCARB2	524.907	1.17256	0.314694	3.72602	0.00019453	0.0015993
ENSGALG00000040418_DGAT2	552.861	-1.17079	0.314248	-3.72569	0.00019478	0.00160052
ENSGALG00000033792	363.677	-1.37854	0.370539	-3.72036	0.00019894	0.0016338
ENSGALG00000004767_ODF2	435.411	-1.18723	0.319165	-3.71981	0.00019937	0.00163651
ENSGALG00000054420	267.937	1.35278	0.363741	3.71909	0.00019994	0.00164029
ENSGALG00000042123_CLDN23	70.4682	1.96838	0.529332	3.71862	0.00020032	0.00164248
ENSGALG00000003969_EMC1	653.608	-1.2267	0.329908	-3.7183	0.00020057	0.00164363
ENSGALG00000016412_MBOAT2	150.681	1.46136	0.393155	3.71702	0.00020159	0.00165111
ENSGALG00000017244_PRSS23	970.727	-1.16411	0.313197	-3.71687	0.00020171	0.00165119
ENSGALG00000009738_CTBP2	80.8782	-1.67351	0.45029	-3.71653	0.00020198	0.00165255
ENSGALG00000026396_BG1	1125.01	-1.18289	0.318401	-3.71509	0.00020313	0.00166105
ENSGALG00000000707_PSMD7	955.756	-1.22907	0.330908	-3.71425	0.00020381	0.00166572
ENSGALG00000001319_CAMK1G	94.4892	2.113	0.569035	3.7133	0.00020457	0.00167105
ENSGALG00000045602_REM1	113.311	1.59932	0.430845	3.71205	0.00020558	0.00167842
ENSGALG00000046687	2994.89	-1.40668	0.379001	-3.71154	0.000206	0.00168093
ENSGALG00000047060	69.4548	-1.76979	0.47687	-3.71126	0.00020623	0.00168186
ENSGALG00000045131	14.4516	-4.14861	1.11792	-3.711	0.00020644	0.0016827
ENSGALG00000042976_UBTF	1552.43	-1.19856	0.323066	-3.70994	0.00020731	0.00168887
ENSGALG00000052945	102.824	-1.90087	0.512821	-3.7067	0.00020998	0.00170973
ENSGALG00000006502_PCGF5	570.814	1.15218	0.311145	3.70305	0.00021303	0.0017336
ENSGALG00000006968_HNF1A	327.165	-1.29064	0.348591	-3.70245	0.00021352	0.00173642
ENSGALG00000033522	291.706	1.30852	0.353429	3.70236	0.0002136	0.00173642
ENSGALG00000014085_TM7SF3	153.243	1.52488	0.411934	3.70176	0.00021411	0.0017396
ENSGALG00000017906_U4	17.518	-4.0904	1.10506	-3.70151	0.00021432	0.00174038
ENSGALG00000020419_LIN52	305.006	1.30153	0.351638	3.70133	0.00021447	0.00174069
ENSGALG00000045878	337.242	-1.64366	0.444186	-3.70038	0.00021528	0.00174631
ENSGALG00000033014	115.103	-1.58492	0.428409	-3.69955	0.00021598	0.00175109
ENSGALG00000008701_XDH	2105.46	-1.32858	0.359268	-3.698	0.0002173	0.00176088
ENSGALG00000007490_DDX54	402.173	-1.19007	0.321879	-3.69725	0.00021795	0.00176514
ENSGALG00000016936_TDRD3	726.061	-1.16722	0.315805	-3.69601	0.00021901	0.00177282
ENSGALG00000001862_ST6GALNAC1	50.0635	-2.62711	0.710865	-3.69566	0.00021932	0.00177435
ENSGALG00000024326_RPUSD4	153.345	-1.45401	0.393511	-3.69498	0.00021991	0.00177819
ENSGALG00000011203_HPSE	103.689	1.67508	0.453494	3.69371	0.00022101	0.00178612
ENSGALG00000006507_CLMP	803.407	1.23699	0.334969	3.69285	0.00022176	0.00179126
ENSGALG00000002108	632.479	-1.34802	0.365089	-3.69232	0.00022222	0.00179328
ENSGALG00000006571_SETD5	1277.98	-1.17212	0.31745	-3.69229	0.00022225	0.00179328
ENSGALG00000032506_GEM	606.505	1.36096	0.368649	3.69176	0.00022271	0.00179604
ENSGALG00000017220	650.697	1.25028	0.338889	3.68934	0.00022484	0.00181228
ENSGALG00000029586_RNF141	1148.61	1.11275	0.301775	3.68735	0.0002266	0.00182553
ENSGALG00000001161_FLI1	648.503	1.1578	0.31405	3.68668	0.0002272	0.00182937
ENSGALG00000052148	18.2603	-3.21478	0.872131	-3.68612	0.0002277	0.00183243
ENSGALG00000007537_INCENP	265.144	-1.35597	0.367919	-3.68552	0.00022824	0.00183511
ENSGALG00000017185_TMEM123	1734.16	1.09471	0.29704	3.68538	0.00022836	0.00183511
ENSGALG00000047058	1414.18	-1.09412	0.296884	-3.68534	0.00022839	0.00183511
ENSGALG00000003572	2938.88	-1.51494	0.41118	-3.68438	0.00022926	0.00184107
ENSGALG00000003022	715.672	-1.24532	0.338059	-3.68374	0.00022984	0.00184476
ENSGALG00000046996_IFN-A	7.08812	-6.91343	1.87736	-3.68252	0.00023094	0.00184871
ENSGALG00000047630_IFN-A	7.08812	-6.91343	1.87736	-3.68252	0.00023094	0.00184871
ENSGALG00000048874_IFN-A	7.08812	-6.91343	1.87736	-3.68252	0.00023094	0.00184871
ENSGALG00000050924_IFN-A	7.08812	-6.91343	1.87736	-3.68252	0.00023094	0.00184871
ENSGALG00000053752_IFN-A	7.08812	-6.91343	1.87736	-3.68252	0.00023094	0.00184871
ENSGALG00000001283_SRRM1	1505.47	-1.13277	0.307777	-3.68049	0.00023278	0.00186056
ENSGALG00000031143_DCPS	109.08	1.59138	0.432366	3.68063	0.00023265	0.00186056
ENSGALG00000031255_FGF1	71.8364	1.8494	0.50247	3.68063	0.00023266	0.00186056
ENSGALG00000006708	57.2661	-1.89538	0.515296	-3.67822	0.00023486	0.00187619
ENSGALG00000002701_DNAJC9	207.569	-1.38428	0.376391	-3.67778	0.00023527	0.00187849
ENSGALG00000010392_CCSER1	687.377	1.14189	0.310643	3.67588	0.00023703	0.00189149
ENSGALG00000029330	838.944	-1.30031	0.353811	-3.67514	0.00023772	0.00189599
ENSGALG00000001737_RABEP1	1391.12	-1.08744	0.295988	-3.67394	0.00023884	0.00190394
ENSGALG00000038758_MMP15	1616.36	-1.1279	0.307071	-3.67309	0.00023963	0.00190927
ENSGALG00000004817_GLOD4	916.451	-1.09702	0.298692	-3.67276	0.00023994	0.00191074
ENSGALG00000008113_PLCL1	200.176	1.35738	0.369641	3.67215	0.00024052	0.00191436
ENSGALG00000009071_HMGB3	993.285	-1.1325	0.308558	-3.67032	0.00024225	0.00192712
ENSGALG00000015898_MYO6	2644.55	-1.22373	0.333614	-3.66811	0.00024435	0.00194257
ENSGALG00000034917_GCDH	372.432	-1.4329	0.390649	-3.66801	0.00024445	0.00194257
ENSGALG00000012550_HMOX1	684.045	-1.17364	0.320031	-3.66729	0.00024513	0.001947
ENSGALG00000012704_MYLIP	996.167	1.12119	0.305826	3.66611	0.00024627	0.00195397
ENSGALG00000050314_SRSF4	199.506	-1.36726	0.37294	-3.66616	0.00024622	0.00195397
ENSGALG00000036774_RPL17	8094.08	1.08404	0.295872	3.66388	0.00024843	0.00197007
ENSGALG00000016817_RASA3	731.632	1.21696	0.332297	3.66226	0.00025	0.00198048
ENSGALG00000031726_MAPRE3	283.756	-1.35054	0.368772	-3.66226	0.00025	0.00198048
ENSGALG00000013372_IL7R	1102.84	1.1027	0.301257	3.66032	0.0002519	0.00199449
ENSGALG00000028026_NDUFS4	254.395	-1.28795	0.351986	-3.6591	0.0002531	0.00200297
ENSGALG00000042810	127.975	1.53485	0.419568	3.65816	0.00025403	0.00200926
ENSGALG00000026517_RFC5	106.641	1.57387	0.430438	3.65643	0.00025575	0.00202183
ENSGALG00000033772_UPF2	1447.31	-1.14528	0.313326	-3.65523	0.00025696	0.0020303
ENSGALG00000004875_PEMT	531.864	-1.17306	0.321178	-3.65235	0.00025985	0.00205212
ENSGALG00000016224_MAOA	4850.27	-1.0655	0.291778	-3.65175	0.00026046	0.00205584
ENSGALG00000013867_PTPN2	798.901	-1.16649	0.319544	-3.65049	0.00026174	0.00206488
ENSGALG00000005930_PLS3	2825.98	-1.07571	0.294744	-3.64963	0.00026261	0.00207071
ENSGALG00000008821_NDUFA5	757.469	1.29864	0.356026	3.6476	0.0002647	0.00208605
ENSGALG00000003227_RAB11FIP4	261.92	-1.32862	0.364297	-3.64708	0.00026524	0.00208923
ENSGALG00000014867_PAIP1	877.534	1.10104	0.301931	3.64664	0.00026569	0.00209169
ENSGALG00000036990_DECR1	3277.5	-1.12942	0.309928	-3.64414	0.00026829	0.00211108
ENSGALG00000014155_OGDH	3214.09	-1.12785	0.309522	-3.64385	0.00026858	0.00211231
ENSGALG00000049429	62.3398	1.98484	0.544745	3.64361	0.00026884	0.00211324
ENSGALG00000043456_SMIM7	509.68	1.19147	0.327288	3.64044	0.00027217	0.00213831
ENSGALG00000036395	98.6981	1.66424	0.457271	3.63951	0.00027316	0.00214495
ENSGALG00000017042_UFM1	813.079	1.17046	0.321939	3.63566	0.00027727	0.00217615
ENSGALG00000031159_HIST1H110	1434.67	1.06763	0.293676	3.63542	0.00027753	0.00217703
ENSGALG00000007299_THOC7	636.965	1.1419	0.314135	3.63507	0.0002779	0.00217884
ENSGALG00000011409_SNRPF	280.965	-1.39014	0.382453	-3.6348	0.00027819	0.00217998
ENSGALG00000047929_SLC44A2	846.844	-3.63631	1.00066	-3.63393	0.00027914	0.0021863
ENSGALG00000030932_NKX2-3	587.752	1.12554	0.309786	3.63327	0.00027985	0.00219069
ENSGALG00000029709_INPP4A	669.955	1.22101	0.336115	3.63272	0.00028045	0.00219432
ENSGALG00000043064_EXFABP	97.0039	1.75526	0.483499	3.63033	0.00028305	0.00221353
ENSGALG00000006019_EPHX4	43.4924	2.33644	0.644085	3.62753	0.00028615	0.00223656
ENSGALG00000002841_RFNG	526.857	1.19681	0.330007	3.62661	0.00028717	0.00224227
ENSGALG00000011392_MSH4	322.123	1.34081	0.369707	3.62667	0.0002871	0.00224227
ENSGALG00000000629	294.222	1.32534	0.365727	3.62386	0.00029024	0.00226503
ENSGALG00000011235_GALNT15	124.905	1.49794	0.413461	3.62293	0.00029129	0.00227209
ENSGALG00000009955_ABCG5	953.336	-1.49092	0.411574	-3.62249	0.00029178	0.00227478
ENSGALG00000011418_CCR6	162.671	1.39983	0.386541	3.62143	0.00029298	0.0022829
ENSGALG00000003285_CDHR2	6812.82	-1.48247	0.40941	-3.62099	0.00029348	0.00228563
ENSGALG00000014872_FGF10	386.391	1.31017	0.361856	3.62071	0.0002938	0.00228577
ENSGALG00000025590_SCARNA16	10.8784	6.16472	1.70261	3.62074	0.00029376	0.00228577
ENSGALG00000054761	6.72806	-6.85812	1.8945	-3.62001	0.00029459	0.0022908
ENSGALG00000053678	223.85	1.3123	0.36257	3.61944	0.00029524	0.00229465
ENSGALG00000007689_CCDC84	48.3441	-2.04194	0.564307	-3.6185	0.00029632	0.00230186
ENSGALG00000024039	465.007	-1.16033	0.320732	-3.61777	0.00029715	0.00230718
ENSGALG00000051957_PTPN12	767.071	-1.09705	0.303257	-3.61757	0.00029739	0.00230782
ENSGALG00000053063_MRPL40	520.412	-1.15416	0.319079	-3.61715	0.00029786	0.00231032
ENSGALG00000047968	6.84599	-6.87705	1.90141	-3.61681	0.00029825	0.00231218
ENSGALG00000015590_MANEA	212.879	1.30419	0.360783	3.61489	0.00030048	0.00232826
ENSGALG00000013715_DLC1	756.697	1.15287	0.319106	3.6128	0.0003029	0.00234493
ENSGALG00000046550	508.528	1.20096	0.332422	3.61277	0.00030294	0.00234493
ENSGALG00000035819_TMEM51	436.898	-1.32562	0.366953	-3.6125	0.00030326	0.0023462
ENSGALG00000003250_ITPA	74.6406	-2.22549	0.616117	-3.61212	0.0003037	0.00234842
ENSGALG00000015543_MRPL50	144.706	-1.58636	0.439236	-3.61164	0.00030427	0.00235092
ENSGALG00000017119_TNFRSF19	440.745	1.28246	0.355095	3.61158	0.00030433	0.00235092
ENSGALG00000012059_OSBPL11	327.283	-1.2781	0.35414	-3.60901	0.00030737	0.00237317
ENSGALG00000006354_GAL3ST2	60.3344	-2.08052	0.576575	-3.60842	0.00030807	0.00237617
ENSGALG00000007199_TRIAP1	293.384	1.28405	0.355853	3.60837	0.00030812	0.00237617
ENSGALG00000029150_AK1	109.34	1.75111	0.485303	3.60829	0.00030822	0.00237617
ENSGALG00000013197_GALNT12	1177.09	-1.07452	0.297882	-3.60721	0.00030951	0.00238374
ENSGALG00000039101_ASIP	20.3109	5.6203	1.55808	3.6072	0.00030952	0.00238374
ENSGALG00000016266_PRRG1	775.451	-1.10808	0.307269	-3.60623	0.00031067	0.00239142
ENSGALG00000005981_GDF2	32.7484	2.56146	0.710411	3.6056	0.00031143	0.00239606
ENSGALG00000035490_MAPK1IP1L	260.06	-1.40353	0.389381	-3.60453	0.00031272	0.00240474
ENSGALG00000006622_FRA10AC1	343.624	-1.3569	0.376479	-3.60418	0.00031315	0.00240613
ENSGALG00000033295_CAV2	245.05	1.46344	0.406046	3.60412	0.00031322	0.00240613
ENSGALG00000013640_MBP	276.303	-1.50736	0.418302	-3.60353	0.00031393	0.00240873
ENSGALG00000040016_PPP1CA	729.342	-1.1216	0.31124	-3.60364	0.00031379	0.00240873
ENSGALG00000042589	94.6594	1.6605	0.460809	3.60344	0.00031403	0.00240873
ENSGALG00000002253_HEMK1	88.1602	1.66304	0.461545	3.6032	0.00031432	0.00240975
ENSGALG00000012792_HIPK2	1523.03	-1.28449	0.356748	-3.60056	0.00031753	0.00243191
ENSGALG00000050194	6.78752	-6.85546	1.904	-3.60056	0.00031753	0.00243191
ENSGALG00000014699_MEGF10	135.546	1.66323	0.462213	3.5984	0.00032018	0.00245095
ENSGALG00000048285_TCN2	1201.99	-1.38379	0.384625	-3.59776	0.00032097	0.00245576
ENSGALG00000026906_TMEM189	503.273	1.18373	0.329052	3.59739	0.00032143	0.00245804
ENSGALG00000012197_ACMSD	40.1458	-2.67053	0.742594	-3.59622	0.00032287	0.00246785
ENSGALG00000049574	86.4377	1.69372	0.471027	3.59581	0.00032338	0.00247051
ENSGALG00000010857_DAB1	493.099	-1.12882	0.314051	-3.59438	0.00032516	0.00248035
ENSGALG00000035701_SMAD3	901.053	-1.14165	0.317598	-3.59463	0.00032485	0.00248035
ENSGALG00000045403_R3HCC1L	97.4968	-1.55035	0.431315	-3.59448	0.00032504	0.00248035
ENSGALG00000049232	52.0826	-2.13804	0.595055	-3.59301	0.00032688	0.0024922
ENSGALG00000000309	1728.32	-1.11076	0.309198	-3.59239	0.00032765	0.00249687
[truncated: 1,906 more rows]

## Sheet: Jejunum vs Proximal Cecum - DES
Supplemental Table 6
Sheet 2: Jejunum vs Proximal Cecum DESeq2 Results
gene_name	baseMean	log2FoldChange	lfcSE	stat	pvalue	padj
ENSGALG00000007109_APOA4	14134.7	-8.39846	0.392231	-21.412	1.03e-101	1.44e-97
ENSGALG00000015730_TMPRSS15	3870.48	-9.37245	0.441054	-21.2501	3.29e-100	2.29e-96
ENSGALG00000009639_DDX60	4957.76	-6.78998	0.325133	-20.8837	7.53e-97	3.5e-93
ENSGALG00000008704_CUBN	2761.39	-8.18684	0.411482	-19.896	4.41e-88	1.53e-84
ENSGALG00000012260_LCT	5159.84	-9.29299	0.506281	-18.3554	2.99e-75	8.32e-72
ENSGALG00000016491_APOB	73608.4	-5.02238	0.276165	-18.1862	6.64e-74	1.54e-70
ENSGALG00000010427_TM4SF4	6166.29	-6.01849	0.338885	-17.7597	1.45e-70	2.88e-67
ENSGALG00000027520	1159.97	-6.52845	0.370583	-17.6167	1.83e-69	3.19e-66
ENSGALG00000005408_BCO1	4031.92	-5.8816	0.334087	-17.605	2.26e-69	3.49e-66
ENSGALG00000000745_SLC26A9	943.587	-8.0632	0.462767	-17.4239	5.43e-68	7.56e-65
ENSGALG00000004170_ADA	8239.72	-4.22806	0.263313	-16.0571	5.1e-58	6.45e-55
ENSGALG00000016662_GATA4	755.694	-8.52774	0.548923	-15.5354	2e-54	2.32e-51
ENSGALG00000035619_MTTP	6500.12	-4.45595	0.288546	-15.4428	8.44e-54	9.04e-51
ENSGALG00000012613_FBP1	1485.3	-4.42874	0.29088	-15.2253	2.4e-52	2.39e-49
ENSGALG00000006728_SLC5A1	12976.6	-3.59965	0.254054	-14.1688	1.43e-45	1.33e-42
ENSGALG00000048876_LEAP2	351.375	-5.82108	0.4225	-13.7777	3.47e-43	3.02e-40
ENSGALG00000037587_ENPP3	1369.13	-5.0136	0.376	-13.3341	1.47e-40	1.13e-37
ENSGALG00000046226_SCARB1	1320.05	-4.58457	0.343801	-13.3349	1.45e-40	1.13e-37
ENSGALG00000053451	433.483	-5.08689	0.383837	-13.2527	4.35e-40	3.19e-37
ENSGALG00000007114_APOA1	110271	-5.21739	0.394574	-13.2228	6.48e-40	4.51e-37
ENSGALG00000047827_TMEM86A	776.788	-4.21774	0.325235	-12.9683	1.85e-38	1.23e-35
ENSGALG00000005580_TMEM56	2369.52	-3.67385	0.286261	-12.8339	1.06e-37	6.7e-35
ENSGALG00000009511	21190	-4.07532	0.317777	-12.8244	1.2e-37	7.24e-35
ENSGALG00000041878_AQP5	1108.24	-5.34511	0.418326	-12.7774	2.19e-37	1.27e-34
ENSGALG00000002960_HMGCS2	425.283	-7.9981	0.628467	-12.7264	4.22e-37	2.35e-34
ENSGALG00000012392_IYD	272.88	-6.44632	0.514428	-12.531	5.05e-36	2.7e-33
ENSGALG00000003972_FAXDC2	296.176	-4.98339	0.400326	-12.4483	1.43e-35	7.36e-33
ENSGALG00000010891_ABCB11	271.162	-5.47597	0.440005	-12.4452	1.48e-35	7.38e-33
ENSGALG00000037854_TKFC	1308.37	-5.06795	0.415889	-12.1858	3.7e-34	1.78e-31
ENSGALG00000008317_SDSL	347.824	-4.25336	0.352846	-12.0544	1.84e-33	8.53e-31
ENSGALG00000015616_ACOT12	237.119	-5.93757	0.498734	-11.9053	1.11e-32	4.99e-30
ENSGALG00000015937_FABP1	8977.74	-4.00928	0.344451	-11.6396	2.59e-31	1.13e-28
ENSGALG00000031872_AGMAT	350.988	-3.97251	0.343918	-11.5508	7.32e-31	3.09e-28
ENSGALG00000010331_MME	7448.89	-3.29713	0.290554	-11.3477	7.61e-30	3.12e-27
ENSGALG00000049065_ZFPM1	622.631	-4.62829	0.414244	-11.1728	5.54e-29	2.2e-26
ENSGALG00000016055_KCNJ15	369.116	5.00126	0.450066	11.1123	1.09e-28	4.23e-26
ENSGALG00000034741_ETNPPL	573.297	-3.49374	0.315815	-11.0626	1.9e-28	7.17e-26
ENSGALG00000054856	215.739	-6.01426	0.550271	-10.9296	8.32e-28	3.05e-25
ENSGALG00000015544_ALDOB	21184.5	-3.76061	0.344261	-10.9237	8.88e-28	3.17e-25
ENSGALG00000011341_UNC93A	195.932	-6.29085	0.576198	-10.9179	9.47e-28	3.3e-25
ENSGALG00000010554	1487.54	-2.93077	0.269139	-10.8894	1.29e-27	4.39e-25
ENSGALG00000005360_CA4	1545.47	3.88893	0.357602	10.875	1.52e-27	5.02e-25
ENSGALG00000006344_GSTT1	1028.61	-3.79014	0.349249	-10.8523	1.95e-27	6.3e-25
ENSGALG00000051301_KHK	340.806	-4.27535	0.396797	-10.7747	4.53e-27	1.43e-24
ENSGALG00000010812_RYR2	2031.49	3.91135	0.366257	10.6792	1.27e-26	3.94e-24
ENSGALG00000001299_GIP	297.62	-8.43519	0.792034	-10.65	1.74e-26	5.27e-24
ENSGALG00000011986_FABP2	5265.4	-3.98337	0.374328	-10.6414	1.91e-26	5.66e-24
ENSGALG00000015053_GLDC	262.503	-4.1291	0.392815	-10.5116	7.64e-26	2.22e-23
ENSGALG00000008840_ACSL5	4295.02	-3.31605	0.316178	-10.4879	9.81e-26	2.79e-23
ENSGALG00000021238	213.891	4.67106	0.445807	10.4778	1.09e-25	3.04e-23
ENSGALG00000028214_OTOP3	277.399	-5.34864	0.510681	-10.4736	1.14e-25	3.12e-23
ENSGALG00000047713_QPRT	249.794	-4.58768	0.439239	-10.4446	1.55e-25	4.15e-23
ENSGALG00000006521_TRPM5	714.427	-3.13929	0.303261	-10.3518	4.11e-25	1.08e-22
ENSGALG00000019175	205.562	-7.36265	0.715258	-10.2937	7.52e-25	1.94e-22
ENSGALG00000043605_BEST4	241.481	5.64095	0.556765	10.1317	4e-24	1.01e-21
ENSGALG00000032836	1204.31	-2.74554	0.272375	-10.08	6.77e-24	1.68e-21
ENSGALG00000013535_CYP4V2	3424.37	-3.79757	0.377087	-10.0708	7.44e-24	1.82e-21
ENSGALG00000007395	1390.72	-4.39135	0.437097	-10.0466	9.51e-24	2.28e-21
ENSGALG00000011391_AMN	251.239	-3.56494	0.355093	-10.0394	1.02e-23	2.41e-21
ENSGALG00000011331_CTH	413.283	3.41776	0.343238	9.95741	2.34e-23	5.43e-21
ENSGALG00000033186_LRRC58	516.601	-3.18607	0.32038	-9.94466	2.66e-23	6.07e-21
ENSGALG00000007311_CLDN2	318.091	-3.41512	0.344479	-9.91387	3.62e-23	8.13e-21
ENSGALG00000013548_GZMA	714.217	-4.4025	0.447427	-9.8396	7.6e-23	1.68e-20
ENSGALG00000051290	283.002	-5.14682	0.523145	-9.83823	7.71e-23	1.68e-20
ENSGALG00000011717	375.167	-3.19267	0.327206	-9.75736	1.72e-22	3.67e-20
ENSGALG00000013297_BBOX1	603.743	-3.52937	0.362274	-9.74226	1.99e-22	4.2e-20
ENSGALG00000011455_CL2	312.42	-3.56298	0.367717	-9.68946	3.34e-22	6.94e-20
ENSGALG00000045878	205.779	-4.15137	0.428519	-9.68771	3.4e-22	6.96e-20
ENSGALG00000043754_GLUL	4272.19	-3.37874	0.350936	-9.62781	6.1e-22	1.23e-19
ENSGALG00000052829_MAMDC4	830.87	-3.69854	0.385274	-9.59977	8.01e-22	1.59e-19
ENSGALG00000015416_SDR16C5	3435.38	-2.64125	0.275809	-9.57638	1.01e-21	1.97e-19
ENSGALG00000036418_ANXA13	2627.83	-2.88945	0.302532	-9.55089	1.29e-21	2.49e-19
ENSGALG00000038290_P4HB	14156.3	-2.50263	0.262628	-9.52917	1.59e-21	3.02e-19
ENSGALG00000011635_TFCP2L1	162.723	5.74289	0.604549	9.49947	2.11e-21	3.97e-19
ENSGALG00000006350_DDTL	997.429	-2.76398	0.291756	-9.4736	2.7e-21	5.02e-19
ENSGALG00000010303	2394.78	-2.8884	0.309524	-9.33173	1.04e-20	1.91e-18
ENSGALG00000018534	156.001	-5.59047	0.604654	-9.24574	2.34e-20	4.22e-18
ENSGALG00000042554_ABCD2	920.842	-2.71854	0.294292	-9.23757	2.52e-20	4.5e-18
ENSGALG00000016431_PAX5	160.653	6.75543	0.733107	9.21479	3.12e-20	5.49e-18
ENSGALG00000005194_CD72	166.617	5.91519	0.647104	9.14101	6.19e-20	1.08e-17
ENSGALG00000002445_KIAA0319L	2688.66	-2.76115	0.302854	-9.11709	7.72e-20	1.33e-17
ENSGALG00000014170_MOGAT2	299.475	-3.01223	0.331021	-9.09983	9.05e-20	1.54e-17
ENSGALG00000010792_AGMO	807.253	-3.81969	0.42175	-9.05677	1.34e-19	2.25e-17
ENSGALG00000010652_SCP2	7635.57	-2.32325	0.257222	-9.03209	1.68e-19	2.79e-17
ENSGALG00000011798_HEBP1	1589.05	-2.47375	0.274217	-9.02115	1.86e-19	3.05e-17
ENSGALG00000005327_RBP2	18927.8	-8.81362	0.979652	-8.99669	2.33e-19	3.77e-17
ENSGALG00000043662_NDRG4	368.723	3.17097	0.352782	8.98845	2.51e-19	4.01e-17
ENSGALG00000029644	170.924	5.83235	0.649641	8.9778	2.76e-19	4.37e-17
ENSGALG00000021658_PAFAH2	213.692	-3.2219	0.360876	-8.92798	4.34e-19	6.79e-17
ENSGALG00000010469_CYP4B7	209.013	7.43806	0.834469	8.91353	4.94e-19	7.65e-17
ENSGALG00000017394_INSIG1	1087.61	-2.8216	0.317029	-8.90014	5.58e-19	8.53e-17
ENSGALG00000007361_SST	145.11	-3.99437	0.449997	-8.87644	6.9e-19	1.04e-16
ENSGALG00000031487_FSTL4	134.945	4.53325	0.510948	8.87225	7.17e-19	1.07e-16
ENSGALG00000031408_SORD	2721.31	-2.33472	0.26342	-8.86311	7.78e-19	1.15e-16
ENSGALG00000042116_FUT9	1604.42	-2.55844	0.288796	-8.85899	8.07e-19	1.18e-16
ENSGALG00000030834_ATP8B1	1027.81	-2.61396	0.295507	-8.84569	9.1e-19	1.32e-16
ENSGALG00000038364_CCN3	170.475	4.70737	0.535825	8.78527	1.56e-18	2.24e-16
ENSGALG00000026727_SLC30A10	696.515	-2.51677	0.288529	-8.72278	2.71e-18	3.86e-16
ENSGALG00000046731	472.536	-4.52404	0.52228	-8.6621	4.63e-18	6.51e-16
ENSGALG00000007814	3485.89	-3.6976	0.427235	-8.65471	4.94e-18	6.88e-16
ENSGALG00000013575_IFI6	600.062	-4.25098	0.493016	-8.6224	6.56e-18	8.98e-16
ENSGALG00000017234_FOLH1	284.112	-2.94128	0.341139	-8.62192	6.58e-18	8.98e-16
ENSGALG00000050857_PTPN20	290.664	-2.83031	0.329075	-8.60082	7.91e-18	1.07e-15
ENSGALG00000010433	812.672	-2.65616	0.309693	-8.57674	9.76e-18	1.29e-15
ENSGALG00000015877_SH3BGRL2	243.926	4.07861	0.475501	8.57749	9.7e-18	1.29e-15
ENSGALG00000009262_FGB	135.172	-4.19802	0.491439	-8.54231	1.32e-17	1.73e-15
ENSGALG00000044436	160.132	-4.09864	0.480453	-8.53078	1.45e-17	1.89e-15
ENSGALG00000000374_RNPEP	1141.42	-2.70226	0.317184	-8.51953	1.6e-17	2.06e-15
ENSGALG00000014938_ABHD3	355.71	-2.68546	0.315319	-8.51663	1.64e-17	2.1e-15
ENSGALG00000047398	1080.5	-2.77998	0.327888	-8.47844	2.28e-17	2.89e-15
ENSGALG00000001918_DNAJB5	611.454	2.61275	0.308791	8.46123	2.65e-17	3.32e-15
ENSGALG00000006565	1105.19	-2.29552	0.272534	-8.42288	3.67e-17	4.57e-15
ENSGALG00000015389_TMPRSS7	108.386	-3.90223	0.471996	-8.26749	1.37e-16	1.69e-14
ENSGALG00000019961_SLC18B1	314.864	-2.67143	0.323265	-8.26389	1.41e-16	1.72e-14
ENSGALG00000009291_EPHX1	1196.85	-2.4501	0.296833	-8.25414	1.53e-16	1.85e-14
ENSGALG00000012200_GCH1	282.773	-3.13385	0.3797	-8.2535	1.54e-16	1.85e-14
ENSGALG00000030034_G6PC	88.4193	-6.37237	0.775878	-8.21311	2.16e-16	2.56e-14
ENSGALG00000003748_ANO5	4111.97	-2.8095	0.342492	-8.20311	2.34e-16	2.76e-14
ENSGALG00000034077_KCNK5	2072.26	-2.55111	0.312906	-8.15296	3.55e-16	4.15e-14
ENSGALG00000032526_B3GNT5	529.375	-2.6199	0.321643	-8.14536	3.78e-16	4.39e-14
ENSGALG00000003839_GRM2	104.046	-4.05935	0.498649	-8.1407	3.93e-16	4.52e-14
ENSGALG00000026572_RGS5	7531.9	2.24551	0.276791	8.11266	4.95e-16	5.65e-14
ENSGALG00000009958_ABCG8	366.128	-3.58251	0.441796	-8.10897	5.11e-16	5.78e-14
ENSGALG00000005708_HNF4beta	880.505	-2.44225	0.301843	-8.09113	5.91e-16	6.64e-14
ENSGALG00000005103_GDPD1	1390.37	-2.65492	0.328475	-8.08255	6.34e-16	7.01e-14
ENSGALG00000014509_BST1	244.893	-2.94097	0.363861	-8.08268	6.34e-16	7.01e-14
ENSGALG00000014963	709.477	2.95347	0.365888	8.07208	6.91e-16	7.57e-14
ENSGALG00000054822	835.821	-2.51474	0.311632	-8.06957	7.05e-16	7.67e-14
ENSGALG00000004424_SEC16B	289.526	-3.19611	0.39665	-8.05776	7.77e-16	8.38e-14
ENSGALG00000020160_ADH6	1410.96	-2.93697	0.364949	-8.04761	8.44e-16	9.04e-14
ENSGALG00000003935_PBLD	318.505	-3.24732	0.403873	-8.04044	8.95e-16	9.51e-14
ENSGALG00000040594_GNPDA1	1091.97	-2.18714	0.272061	-8.03913	9.05e-16	9.54e-14
ENSGALG00000043053_DAO	86.7534	-5.66168	0.705228	-8.02815	9.9e-16	1.04e-13
ENSGALG00000008185_AOX1	248.49	3.5811	0.446215	8.02549	1.01e-15	1.05e-13
ENSGALG00000030007	545.154	3.94431	0.492861	8.0029	1.22e-15	1.25e-13
ENSGALG00000026945_CIDEC	168.702	-3.29252	0.41421	-7.9489	1.88e-15	1.93e-13
ENSGALG00000045122_AKR1B1	1849.76	2.5723	0.323849	7.9429	1.98e-15	2.01e-13
ENSGALG00000016837	109.129	-3.89483	0.492518	-7.908	2.62e-15	2.64e-13
ENSGALG00000031341	12745.9	-2.51866	0.318651	-7.90413	2.7e-15	2.7e-13
ENSGALG00000001325_CYP1A1	103.123	-6.63658	0.843521	-7.86771	3.61e-15	3.57e-13
ENSGALG00000047952	126.993	-4.06327	0.516444	-7.86778	3.61e-15	3.57e-13
ENSGALG00000012418_KYNU	124.984	-3.41306	0.435735	-7.83289	4.77e-15	4.67e-13
ENSGALG00000031737	5534.21	-2.52999	0.323801	-7.81341	5.57e-15	5.42e-13
ENSGALG00000008795_GPAM	388.066	-2.75311	0.354497	-7.76623	8.09e-15	7.82e-13
ENSGALG00000013637_TDP2	613.09	-2.33481	0.300766	-7.76289	8.3e-15	7.97e-13
ENSGALG00000029015_TM6SF2	97.9656	-4.21053	0.542763	-7.75759	8.66e-15	8.25e-13
ENSGALG00000021039_HKDC1	3383.34	-2.40238	0.31089	-7.72745	1.1e-14	1.04e-12
ENSGALG00000015086_OSBPL1A	1223.05	-2.27603	0.295058	-7.71384	1.22e-14	1.15e-12
ENSGALG00000008498_MALRD1	2439.96	-2.22684	0.289116	-7.70226	1.34e-14	1.24e-12
ENSGALG00000017167_SLC35F2	136.509	-3.42326	0.44446	-7.70207	1.34e-14	1.24e-12
ENSGALG00000016797_FHL2	3899.48	2.75783	0.358521	7.69224	1.45e-14	1.33e-12
ENSGALG00000047269_TMEM135	800.876	-2.30584	0.300032	-7.68531	1.53e-14	1.4e-12
ENSGALG00000001824	1415.18	-3.00574	0.391201	-7.68336	1.55e-14	1.41e-12
ENSGALG00000014950	3897.08	-2.21984	0.289102	-7.67841	1.61e-14	1.46e-12
ENSGALG00000008237_GRAMD2B	511.678	-2.88683	0.376889	-7.65963	1.86e-14	1.67e-12
ENSGALG00000015702_PTGR1	2479.06	-2.3304	0.304426	-7.65506	1.93e-14	1.72e-12
ENSGALG00000000866_SELENBP1	1682.67	3.12953	0.409562	7.64117	2.15e-14	1.91e-12
ENSGALG00000001320_CYP1A2	140.61	-8.3868	1.09921	-7.62983	2.35e-14	2.07e-12
ENSGALG00000013094_DDC	403.863	-3.10278	0.407121	-7.62127	2.51e-14	2.2e-12
ENSGALG00000033683_PHOSPHO1	898.543	-3.03125	0.398027	-7.61569	2.62e-14	2.28e-12
ENSGALG00000023691_ENTPD7	280.709	-2.52474	0.331845	-7.6082	2.78e-14	2.4e-12
ENSGALG00000039335_SLC25A22	824.499	-2.21613	0.292913	-7.56581	3.85e-14	3.31e-12
ENSGALG00000016142_MX1	297.438	-2.5177	0.333331	-7.55315	4.25e-14	3.63e-12
ENSGALG00000033338_GPT2	1908.26	-2.8536	0.377884	-7.55153	4.3e-14	3.65e-12
ENSGALG00000006855_MELTF	1640.69	-2.36938	0.313858	-7.54921	4.38e-14	3.69e-12
ENSGALG00000009415_SMOC1	304.838	2.57106	0.340992	7.53994	4.7e-14	3.94e-12
ENSGALG00000004106_DHCR7	187.975	-3.18016	0.423476	-7.50965	5.93e-14	4.94e-12
ENSGALG00000009306_SLC2A2	633.803	-9.29288	1.23842	-7.5038	6.2e-14	5.14e-12
ENSGALG00000015492_PDZK1	3391.78	-2.1616	0.288538	-7.49156	6.81e-14	5.61e-12
ENSGALG00000007791_OTOP2	210.38	4.05223	0.541017	7.49002	6.89e-14	5.64e-12
ENSGALG00000033256_PCSK5	3275.96	-2.27382	0.303881	-7.4826	7.29e-14	5.93e-12
ENSGALG00000012710_NCS1	658.39	2.89574	0.387484	7.47319	7.83e-14	6.33e-12
ENSGALG00000006341_SLC25A48	111.209	4.22796	0.56582	7.47228	7.88e-14	6.34e-12
ENSGALG00000015662	142.645	-3.30003	0.442843	-7.45192	9.2e-14	7.36e-12
ENSGALG00000038850_WNK2	282.81	2.76753	0.371899	7.44163	9.95e-14	7.91e-12
ENSGALG00000030988_RBPMS2	641.187	2.43054	0.326734	7.4389	1.02e-13	8.03e-12
ENSGALG00000002466_SLC2A5	856.653	-2.96245	0.400441	-7.39798	1.38e-13	1.09e-11
ENSGALG00000016558_VEGFD	167.893	2.84969	0.385907	7.38439	1.53e-13	1.19e-11
ENSGALG00000025804_CLCN2	519.961	-2.47448	0.335102	-7.38428	1.53e-13	1.19e-11
ENSGALG00000001252_CREB3L3	1266.25	-2.59232	0.35486	-7.30518	2.77e-13	2.14e-11
ENSGALG00000011221_GPAT3	723.749	-2.04657	0.281593	-7.26783	3.65e-13	2.81e-11
ENSGALG00000012232_DNAAF2	129.056	-2.98566	0.411145	-7.26181	3.82e-13	2.92e-11
ENSGALG00000040493_PTN	880.057	2.1019	0.289515	7.26007	3.87e-13	2.94e-11
ENSGALG00000003022	429.445	-2.28222	0.314653	-7.25313	4.07e-13	3.08e-11
ENSGALG00000038753_SAR1B	1105.38	-2.1332	0.294862	-7.23456	4.67e-13	3.51e-11
ENSGALG00000050352_BCL2L15	532.441	-2.18234	0.301919	-7.22822	4.89e-13	3.66e-11
ENSGALG00000030801_CCKAR	181.714	2.73412	0.378379	7.22589	4.98e-13	3.71e-11
ENSGALG00000013803_ADGRG6	1721.3	-2.25492	0.312508	-7.21554	5.37e-13	3.98e-11
ENSGALG00000030863	977.611	-2.646	0.370387	-7.14389	9.07e-13	6.68e-11
ENSGALG00000035842_SLC37A2	138.514	3.08938	0.432581	7.14175	9.21e-13	6.73e-11
ENSGALG00000047352	374.606	-2.37674	0.332806	-7.1415	9.23e-13	6.73e-11
ENSGALG00000011902_TAGLN	16871	2.37803	0.333259	7.13566	9.63e-13	6.98e-11
ENSGALG00000033561_DGKB	105.174	3.75562	0.526399	7.13455	9.71e-13	7e-11
ENSGALG00000002581	3160.69	-2.37733	0.333337	-7.13191	9.9e-13	7.1e-11
ENSGALG00000011086_ACTA1	2071.26	3.32429	0.46939	7.08215	1.42e-12	1.01e-10
ENSGALG00000038618_ONECUT1	74.6526	-6.89426	0.974033	-7.07805	1.46e-12	1.04e-10
ENSGALG00000016251	158.414	3.17714	0.449053	7.0752	1.49e-12	1.05e-10
ENSGALG00000005795_CYP2C23b	4353.27	-3.16299	0.448063	-7.05927	1.67e-12	1.18e-10
ENSGALG00000002595_GPX4	2309.79	-1.91589	0.271831	-7.04808	1.81e-12	1.27e-10
ENSGALG00000015669_PTBP3	392.653	-2.22873	0.316277	-7.04676	1.83e-12	1.27e-10
ENSGALG00000020260_PGRMC1	4239.53	-2.14381	0.305021	-7.0284	2.09e-12	1.45e-10
ENSGALG00000013993_VNN1	516.391	-2.20106	0.313537	-7.02008	2.22e-12	1.53e-10
ENSGALG00000028983_HOXA9	88.1174	6.59125	0.939436	7.01618	2.28e-12	1.56e-10
ENSGALG00000009560_MSMO1	1189.56	-2.53857	0.36209	-7.01088	2.37e-12	1.62e-10
ENSGALG00000001949_MDH2	2500.51	-1.95371	0.27882	-7.00706	2.43e-12	1.65e-10
ENSGALG00000001369	4006.63	-1.92369	0.274664	-7.00378	2.49e-12	1.68e-10
ENSGALG00000036831	1057.54	-2.52278	0.361452	-6.97958	2.96e-12	1.99e-10
ENSGALG00000009848_LPGAT1	1610.41	-2.09183	0.300782	-6.95462	3.54e-12	2.37e-10
ENSGALG00000033090_VDR	429.094	-2.5844	0.372466	-6.93862	3.96e-12	2.64e-10
ENSGALG00000034772	2032.66	-2.19855	0.317011	-6.93526	4.05e-12	2.69e-10
ENSGALG00000052014_PCK2	910.924	-2.29618	0.333449	-6.88617	5.73e-12	3.78e-10
ENSGALG00000014995_PGM5	1241.69	2.03272	0.295841	6.87098	6.38e-12	4.19e-10
ENSGALG00000013124_FHOD3	831.232	2.14831	0.312868	6.86649	6.58e-12	4.3e-10
ENSGALG00000002162_ACO1	2602.34	-1.82113	0.26607	-6.84458	7.67e-12	4.99e-10
ENSGALG00000016266_PRRG1	495.832	-2.12597	0.310783	-6.84067	7.88e-12	5.08e-10
ENSGALG00000054926	128.54	-3.09217	0.452002	-6.84105	7.86e-12	5.08e-10
ENSGALG00000012699_MCUR1	371.553	-2.16464	0.316837	-6.83203	8.37e-12	5.37e-10
ENSGALG00000040021_HOXA11	127.344	10.1713	1.49517	6.80278	1.03e-11	6.55e-10
ENSGALG00000025842_TPM2	36702.5	2.38321	0.350379	6.80183	1.03e-11	6.57e-10
ENSGALG00000036566	1741.53	2.1165	0.311446	6.79573	1.08e-11	6.82e-10
ENSGALG00000028721_LMOD1	2989.94	2.14558	0.317039	6.76757	1.31e-11	8.25e-10
ENSGALG00000002647_PLS1	2463.57	-1.85724	0.274644	-6.76236	1.36e-11	8.51e-10
ENSGALG00000007959_SLC26A3	1505.78	6.97063	1.03189	6.75519	1.43e-11	8.9e-10
ENSGALG00000041626_MEIS1	549.298	2.00683	0.297428	6.74731	1.51e-11	9.36e-10
ENSGALG00000050294	222.285	-2.67851	0.397114	-6.74494	1.53e-11	9.47e-10
ENSGALG00000002187_HSD17B4	5263.46	-1.837	0.272379	-6.74428	1.54e-11	9.47e-10
ENSGALG00000003765_A1CF	1025.37	-1.9467	0.289875	-6.71567	1.87e-11	1.15e-09
ENSGALG00000009422_RGS10	559.305	2.36346	0.352773	6.69965	2.09e-11	1.28e-09
ENSGALG00000009807_FLVCR1	496.788	-2.37114	0.354054	-6.69712	2.13e-11	1.29e-09
ENSGALG00000013828_GALM	520.585	-1.97579	0.294996	-6.69769	2.12e-11	1.29e-09
ENSGALG00000016560_SELENOI	1231.49	-2.11187	0.316775	-6.66677	2.61e-11	1.58e-09
ENSGALG00000015141_GDA	644.817	-1.94223	0.291805	-6.65593	2.82e-11	1.69e-09
ENSGALG00000002818_VAT1	799.777	-2.22114	0.333947	-6.65119	2.91e-11	1.74e-09
ENSGALG00000006872_PISD	490.567	-2.10806	0.317106	-6.64781	2.97e-11	1.77e-09
ENSGALG00000011686_SEMA5B	1813.08	-2.28737	0.344266	-6.6442	3.05e-11	1.81e-09
ENSGALG00000031890_YBX3	2083.31	1.79645	0.271027	6.6283	3.4e-11	2e-09
ENSGALG00000006520_MYH11	71515	2.19998	0.332321	6.62003	3.59e-11	2.11e-09
ENSGALG00000005696_ABHD6	1198.61	-1.78572	0.269839	-6.61774	3.65e-11	2.12e-09
ENSGALG00000011865_SMTN	4084.09	1.90944	0.288512	6.61825	3.63e-11	2.12e-09
ENSGALG00000016943_OLFM4	2320.99	-2.21183	0.334305	-6.6162	3.69e-11	2.14e-09
ENSGALG00000011306_DES	24225.4	1.9258	0.292229	6.59005	4.4e-11	2.53e-09
ENSGALG00000013546	126.494	-2.80255	0.42525	-6.59034	4.39e-11	2.53e-09
ENSGALG00000002053_POR	3423.91	-1.85769	0.281941	-6.58892	4.43e-11	2.54e-09
ENSGALG00000015366	607.426	-2.70349	0.41074	-6.582	4.64e-11	2.65e-09
ENSGALG00000048285_TCN2	760.203	-2.69672	0.409782	-6.58087	4.68e-11	2.66e-09
ENSGALG00000046347_FOXRED1	592.025	-2.42745	0.3697	-6.56601	5.17e-11	2.92e-09
ENSGALG00000010614_SLC25A4	807.279	2.19863	0.33497	6.56366	5.25e-11	2.96e-09
ENSGALG00000026757_DHFR	275.696	-2.51212	0.38343	-6.55171	5.69e-11	3.19e-09
ENSGALG00000031450_MYO7A	116.593	3.72834	0.571498	6.5238	6.85e-11	3.83e-09
ENSGALG00000036950_CASP14	54.6192	-6.39823	0.980803	-6.52346	6.87e-11	3.83e-09
ENSGALG00000028567_MYL9	8621.28	2.25142	0.345201	6.52205	6.94e-11	3.85e-09
ENSGALG00000016300_TINAG	841.604	-1.87525	0.287618	-6.51993	7.03e-11	3.89e-09
ENSGALG00000037629_TRANK1	2541.99	-2.24389	0.344442	-6.51456	7.29e-11	4.01e-09
ENSGALG00000002390_CA6	137	-2.79592	0.429715	-6.50644	7.7e-11	4.22e-09
ENSGALG00000004373_KCNJ16	844.28	2.20977	0.340192	6.49566	8.27e-11	4.51e-09
ENSGALG00000002683_DECR2	551.261	-1.92312	0.296188	-6.4929	8.42e-11	4.58e-09
ENSGALG00000041977_RNF128	1687.62	-2.68812	0.415894	-6.46348	1.02e-10	5.54e-09
ENSGALG00000025743_CDR2	1394.47	-1.84008	0.284917	-6.45831	1.06e-10	5.71e-09
ENSGALG00000010110_TMEM53	71.3717	-3.45284	0.535155	-6.45204	1.1e-10	5.93e-09
ENSGALG00000002201_PPL	2277.71	2.20171	0.342223	6.43356	1.25e-10	6.67e-09
ENSGALG00000045936_FAM83F	590.663	-2.18052	0.340269	-6.40822	1.47e-10	7.85e-09
ENSGALG00000039528_PLCE1	357.426	2.53068	0.395999	6.39062	1.65e-10	8.78e-09
ENSGALG00000006322_CLCA1	10914.3	-2.78047	0.436468	-6.37038	1.89e-10	9.98e-09
ENSGALG00000054799_SPIC	100.41	7.37671	1.16032	6.3575	2.05e-10	1.08e-08
ENSGALG00000025844_AMT	454.126	-1.98469	0.312411	-6.35281	2.11e-10	1.1e-08
ENSGALG00000028084_FAAH2	776.07	-1.77061	0.278712	-6.35285	2.11e-10	1.1e-08
ENSGALG00000032986_CFTR	638.178	1.99685	0.31427	6.35392	2.1e-10	1.1e-08
ENSGALG00000008542_ADD3	2378.2	1.68418	0.265255	6.34926	2.16e-10	1.12e-08
ENSGALG00000034855_HK2	1009.27	1.95067	0.307621	6.34115	2.28e-10	1.18e-08
ENSGALG00000046192_CCL19	318.382	2.61225	0.412199	6.33735	2.34e-10	1.21e-08
ENSGALG00000005986_TUB	485.789	2.07876	0.328801	6.32224	2.58e-10	1.32e-08
ENSGALG00000007716_SLC37A4	637.291	-2.2155	0.350678	-6.31776	2.65e-10	1.36e-08
ENSGALG00000015040_SLC16A10	1755.73	-2.14191	0.339301	-6.31273	2.74e-10	1.4e-08
ENSGALG00000049231_DNAJC22	929.171	-2.4284	0.38474	-6.3118	2.76e-10	1.4e-08
ENSGALG00000043906	440.816	-1.90853	0.302412	-6.31101	2.77e-10	1.4e-08
ENSGALG00000037289_ATL2	2684	-1.6725	0.265226	-6.30592	2.86e-10	1.44e-08
ENSGALG00000049547	1492.16	-1.69853	0.269576	-6.30075	2.96e-10	1.49e-08
ENSGALG00000005268_SEC22C	244.648	-2.4101	0.382597	-6.29931	2.99e-10	1.5e-08
ENSGALG00000014971_SLC2A9	415.557	2.64408	0.419771	6.29885	3e-10	1.5e-08
ENSGALG00000006300_LDHA	7790.79	-2.4262	0.386598	-6.27578	3.48e-10	1.73e-08
ENSGALG00000026311_C12orf75	103.27	2.97242	0.474391	6.26575	3.71e-10	1.84e-08
ENSGALG00000002103_TPPP3	244.51	3.08887	0.49354	6.2586	3.88e-10	1.92e-08
ENSGALG00000009830_MGAT4D	1497.59	-1.69415	0.271439	-6.24137	4.34e-10	2.13e-08
ENSGALG00000051992_CYP2J23	763.443	-2.14086	0.34318	-6.23831	4.42e-10	2.17e-08
ENSGALG00000009955_ABCG5	612.182	-2.72857	0.437588	-6.23546	4.5e-10	2.2e-08
ENSGALG00000027771_CACNG1	55.1838	5.53076	0.887856	6.22934	4.68e-10	2.28e-08
ENSGALG00000040716_PRLH	74.3888	7.05458	1.13376	6.2223	4.9e-10	2.38e-08
ENSGALG00000013743_ENPP7	2382.27	-10.0714	1.61893	-6.22102	4.94e-10	2.38e-08
ENSGALG00000026631_HOXA10	167.94	9.12882	1.46732	6.22144	4.93e-10	2.38e-08
ENSGALG00000048343	7472.3	-1.70196	0.273988	-6.2118	5.24e-10	2.51e-08
ENSGALG00000043764_KCNS2	64.5978	6.13649	0.988506	6.20784	5.37e-10	2.57e-08
ENSGALG00000008818_IDH1	3553.55	-1.72575	0.278081	-6.20593	5.44e-10	2.59e-08
ENSGALG00000003767_NKD1	312.067	2.06489	0.332948	6.20186	5.58e-10	2.64e-08
ENSGALG00000004545_WDR72	92.8322	7.27406	1.17279	6.20238	5.56e-10	2.64e-08
ENSGALG00000026605_BAG2	729.101	2.14083	0.345239	6.20102	5.61e-10	2.65e-08
ENSGALG00000004332_PLA2G12B	647.56	-2.21342	0.357729	-6.18743	6.12e-10	2.88e-08
ENSGALG00000031142_ACAA2	1357.47	-1.73847	0.281066	-6.18528	6.2e-10	2.91e-08
ENSGALG00000001206	118.361	-3.13068	0.507239	-6.172	6.74e-10	3.15e-08
ENSGALG00000004162_SLC16A6	133.114	-2.85445	0.463171	-6.16284	7.14e-10	3.33e-08
ENSGALG00000051311	52.5022	-4.52264	0.734039	-6.16131	7.21e-10	3.35e-08
ENSGALG00000009276_LRAT	75.2926	-3.69947	0.60055	-6.16014	7.27e-10	3.36e-08
ENSGALG00000035094_CDH17	5231.14	-1.60609	0.26082	-6.15787	7.37e-10	3.4e-08
ENSGALG00000038923	737.117	-1.79335	0.291337	-6.1556	7.48e-10	3.44e-08
ENSGALG00000010385	358.923	-1.91076	0.311098	-6.142	8.15e-10	3.73e-08
ENSGALG00000010027_CFL2	873.455	2.17356	0.354264	6.13543	8.49e-10	3.88e-08
ENSGALG00000019384_MAPK12	133.885	2.76903	0.451962	6.12669	8.97e-10	4.08e-08
ENSGALG00000012061	4006.67	-1.7823	0.291125	-6.12213	9.23e-10	4.19e-08
ENSGALG00000026661_MSRB3	1553.12	2.02069	0.330573	6.11271	9.8e-10	4.43e-08
ENSGALG00000048624_SGPP2	176.117	-2.60692	0.426626	-6.11056	9.93e-10	4.47e-08
ENSGALG00000003601_ATP2B4	2213.8	1.61905	0.264995	6.10974	9.98e-10	4.48e-08
ENSGALG00000039334	486.238	1.99024	0.3261	6.10316	1.04e-09	4.65e-08
ENSGALG00000026553	276.583	2.48581	0.407493	6.10026	1.06e-09	4.72e-08
ENSGALG00000053112	158.211	-2.53736	0.416138	-6.0974	1.08e-09	4.79e-08
ENSGALG00000004763_ALDH3A2	3695.12	-1.87438	0.307775	-6.0901	1.13e-09	5e-08
ENSGALG00000012715_CAP2	1236.48	1.96215	0.322409	6.0859	1.16e-09	5.12e-08
ENSGALG00000006417_SEC24A	2288.16	-1.63311	0.26847	-6.083	1.18e-09	5.2e-08
ENSGALG00000039738_SLC9A3	1046.84	-2.11204	0.348064	-6.06795	1.3e-09	5.69e-08
ENSGALG00000038152_ABCC6	351.264	-2.0527	0.339189	-6.05179	1.43e-09	6.27e-08
ENSGALG00000012971_CCDC170	66.7356	3.33959	0.552919	6.03992	1.54e-09	6.73e-08
ENSGALG00000000161_ISOC1	645.53	-1.84615	0.305764	-6.03784	1.56e-09	6.79e-08
ENSGALG00000009270_HOXD10	63.9645	9.19151	1.52409	6.03084	1.63e-09	7.07e-08
ENSGALG00000043118_ATP10A	1283.45	-1.99651	0.332318	-6.00783	1.88e-09	8.13e-08
ENSGALG00000027234_HOXA13	72.7442	6.91356	1.15267	5.99789	2e-09	8.61e-08
ENSGALG00000007383_HSPB8	144.336	2.34826	0.39183	5.99305	2.06e-09	8.85e-08
ENSGALG00000011551_JCHAIN	5739.08	-1.97204	0.329337	-5.98792	2.13e-09	9.1e-08
ENSGALG00000004398_CARD11	630.357	1.82064	0.304574	5.97765	2.26e-09	9.67e-08
ENSGALG00000030530_HAND2	207.772	2.45573	0.411032	5.97455	2.31e-09	9.82e-08
ENSGALG00000000318_CSRP1	8012.37	1.94236	0.32547	5.96787	2.4e-09	1.02e-07
ENSGALG00000039269_RNF213	2217.42	-1.61046	0.269932	-5.96616	2.43e-09	1.03e-07
ENSGALG00000002118_KCNMB1	853.525	1.89113	0.317474	5.95679	2.57e-09	1.08e-07
ENSGALG00000002557_ADGRD1	219.766	2.44477	0.410526	5.95521	2.6e-09	1.09e-07
ENSGALG00000030920_APOC3	43.1819	-5.94899	1.0002	-5.9478	2.72e-09	1.14e-07
ENSGALG00000014913_ROS1	2187.61	-1.72113	0.289963	-5.93569	2.93e-09	1.22e-07
ENSGALG00000046687	2084.08	-1.9265	0.324551	-5.9359	2.92e-09	1.22e-07
ENSGALG00000046952	613.117	-1.79341	0.302193	-5.93466	2.94e-09	1.22e-07
ENSGALG00000037272_HOXD8	48.6745	5.00354	0.844046	5.92804	3.07e-09	1.27e-07
ENSGALG00000050292	300.693	-1.89955	0.320656	-5.92394	3.14e-09	1.3e-07
ENSGALG00000042227_GNLY	3633.92	-1.55854	0.263125	-5.92319	3.16e-09	1.3e-07
ENSGALG00000021451	798.336	-1.94993	0.329315	-5.92118	3.2e-09	1.31e-07
ENSGALG00000039872_PDLIM4	536.197	2.11111	0.356899	5.91515	3.32e-09	1.36e-07
ENSGALG00000007382_CDA	174.625	-2.13207	0.360657	-5.91164	3.39e-09	1.38e-07
ENSGALG00000019514_CNDP2	4454.93	-1.91796	0.325068	-5.90018	3.63e-09	1.48e-07
ENSGALG00000008701_XDH	1381.38	-2.26811	0.385052	-5.89038	3.85e-09	1.56e-07
ENSGALG00000033671_FREM2	509.426	2.50089	0.42488	5.8861	3.95e-09	1.6e-07
ENSGALG00000032922_GSTM2	2894.88	-1.93984	0.329606	-5.88532	3.97e-09	1.6e-07
ENSGALG00000013265_GYS2	74.9764	3.99334	0.678755	5.88332	4.02e-09	1.62e-07
ENSGALG00000052737	742.889	-1.75206	0.298015	-5.87908	4.13e-09	1.65e-07
ENSGALG00000020895	96.3009	2.85968	0.486588	5.877	4.18e-09	1.67e-07
ENSGALG00000016342_MYOM2	54.5612	-3.3252	0.566007	-5.87483	4.23e-09	1.69e-07
ENSGALG00000007675_CXCR5	65.7004	4.12506	0.702378	5.873	4.28e-09	1.7e-07
ENSGALG00000010158_KANK1	1172.21	1.63591	0.279068	5.86205	4.57e-09	1.81e-07
ENSGALG00000027925_HOXA3	149.24	2.28089	0.389358	5.85807	4.68e-09	1.85e-07
ENSGALG00000015294_ADGRG7	404.519	-1.85022	0.316662	-5.84287	5.13e-09	2.02e-07
ENSGALG00000050630	95.9497	-2.78153	0.476116	-5.84212	5.15e-09	2.03e-07
ENSGALG00000014944_GCNT4	164.542	2.72716	0.467545	5.83293	5.45e-09	2.14e-07
ENSGALG00000009130_GPCPD1	785.418	-1.93195	0.331756	-5.8234	5.77e-09	2.25e-07
ENSGALG00000007596	75.6693	2.99596	0.514995	5.81745	5.98e-09	2.33e-07
ENSGALG00000013414_PDLIM3	1629.15	1.93195	0.332213	5.81538	6.05e-09	2.35e-07
ENSGALG00000033260_ST3GAL5	709.783	-1.72614	0.296809	-5.81564	6.04e-09	2.35e-07
ENSGALG00000030550_ATP2B1	3705.63	-1.50702	0.259213	-5.81382	6.11e-09	2.36e-07
ENSGALG00000015663_HSDL2	1781.94	-1.73612	0.298654	-5.81313	6.13e-09	2.36e-07
ENSGALG00000014570_LPCAT3	603.211	-1.71572	0.295594	-5.80431	6.46e-09	2.49e-07
ENSGALG00000003213_LGALS2	1673.32	-2.37062	0.409454	-5.78971	7.05e-09	2.7e-07
ENSGALG00000046992_MCRIP2	408.511	-2.15368	0.372019	-5.78917	7.07e-09	2.7e-07
ENSGALG00000039257_CYP4F11	1795.66	-1.91538	0.332067	-5.76804	8.02e-09	3.06e-07
ENSGALG00000011544	1034.23	-1.76837	0.306669	-5.76637	8.1e-09	3.08e-07
ENSGALG00000032544_ALDH5A1	978.981	-1.65029	0.286406	-5.76209	8.31e-09	3.15e-07
ENSGALG00000013723_OASL	719.308	-2.59516	0.450795	-5.75686	8.57e-09	3.24e-07
ENSGALG00000011405_SLC4A7	1141.74	-1.55074	0.269856	-5.74657	9.11e-09	3.44e-07
ENSGALG00000005849_PPDPF	1241.59	1.92287	0.334699	5.74507	9.19e-09	3.46e-07
ENSGALG00000046261	110.764	2.48712	0.434593	5.72288	1.05e-08	3.93e-07
ENSGALG00000039209_WIF1	124.416	2.81943	0.492979	5.71917	1.07e-08	4.01e-07
ENSGALG00000037525_FGFRL1	287.942	1.98441	0.347212	5.71526	1.1e-08	4.09e-07
ENSGALG00000012988_B4GALNT3	85.8217	3.34676	0.586974	5.70173	1.19e-08	4.41e-07
ENSGALG00000013708_CYB5A	4744.88	-1.51309	0.265396	-5.70124	1.19e-08	4.41e-07
ENSGALG00000044592	113.242	-2.42243	0.425111	-5.69836	1.21e-08	4.48e-07
ENSGALG00000013948_RASL11B	71.59	3.57938	0.629472	5.68632	1.3e-08	4.79e-07
ENSGALG00000004965_SLC27A4	1634.67	-1.63985	0.288631	-5.68147	1.34e-08	4.92e-07
ENSGALG00000001021_MYOCD	329.471	1.90584	0.335909	5.67367	1.4e-08	5.13e-07
ENSGALG00000005206_ACSL3	632.802	-1.79816	0.317203	-5.66878	1.44e-08	5.27e-07
ENSGALG00000005160_VMP1	666.845	-1.7	0.299917	-5.66822	1.44e-08	5.27e-07
ENSGALG00000036775_SETBP1	644.189	1.81685	0.320635	5.66641	1.46e-08	5.31e-07
ENSGALG00000035057_SLC35B1	917.57	-1.5753	0.278045	-5.66563	1.46e-08	5.32e-07
ENSGALG00000008738	340.409	-1.88639	0.333038	-5.66419	1.48e-08	5.35e-07
ENSGALG00000006074_SOX6	440.019	-1.8263	0.32333	-5.64842	1.62e-08	5.85e-07
ENSGALG00000041533_SLC11A2	562.474	-1.70525	0.302014	-5.64626	1.64e-08	5.91e-07
ENSGALG00000004246_SLC6A4	341.257	-1.89673	0.336598	-5.635	1.75e-08	6.3e-07
ENSGALG00000012809_ECI2	774.264	-1.67094	0.297203	-5.62223	1.89e-08	6.76e-07
ENSGALG00000014836_LPIN2	1414	-1.75543	0.312724	-5.61334	1.98e-08	7.1e-07
ENSGALG00000020688_CYP4A22	1418.88	-1.60727	0.286735	-5.6054	2.08e-08	7.42e-07
ENSGALG00000006779_PDZD3	406.146	-1.85714	0.331456	-5.60298	2.11e-08	7.5e-07
ENSGALG00000053539	78.9739	-2.67953	0.479244	-5.59116	2.26e-08	8.01e-07
ENSGALG00000010857_DAB1	285.611	-2.05212	0.367235	-5.58803	2.3e-08	8.13e-07
ENSGALG00000052213	213.386	-2.2051	0.394818	-5.58511	2.34e-08	8.25e-07
ENSGALG00000016567_EPHX2	728.653	-1.67638	0.300206	-5.5841	2.35e-08	8.28e-07
ENSGALG00000000251_CD79B	76.3907	3.0689	0.551084	5.56884	2.56e-08	9.01e-07
ENSGALG00000012712_RBM24	173.621	2.22621	0.399848	5.56765	2.58e-08	9.05e-07
ENSGALG00000006689_ABHD2	1261.82	-1.79443	0.322933	-5.55666	2.75e-08	9.62e-07
ENSGALG00000001926_HSPB1	2632.22	1.986	0.357497	5.55529	2.77e-08	9.64e-07
ENSGALG00000009365_CYP51A1	433.353	-2.24281	0.403719	-5.55537	2.77e-08	9.64e-07
ENSGALG00000033034_SLC25A34	128.393	-2.39066	0.430839	-5.54884	2.88e-08	9.98e-07
ENSGALG00000006649_TMEM41A	755.026	-2.08914	0.376538	-5.54829	2.88e-08	9.99e-07
ENSGALG00000050831	1443.43	-1.5437	0.279127	-5.53048	3.19e-08	1.1e-06
ENSGALG00000054273_RASSF8	493.933	1.71815	0.310744	5.52915	3.22e-08	1.11e-06
ENSGALG00000011994_SYNPO2	5402.63	1.94944	0.352607	5.52866	3.23e-08	1.11e-06
ENSGALG00000047174	41.9895	8.56522	1.54974	5.52687	3.26e-08	1.12e-06
ENSGALG00000008077	64.7359	3.01855	0.546361	5.52483	3.3e-08	1.13e-06
ENSGALG00000035853_SCRN2	189.652	-2.11346	0.382538	-5.52484	3.3e-08	1.13e-06
ENSGALG00000035949_ACAD11	858.056	-1.64437	0.297785	-5.52201	3.35e-08	1.14e-06
ENSGALG00000037371_TMEM65	305.388	-1.86185	0.337768	-5.51223	3.54e-08	1.2e-06
ENSGALG00000033677_AHCY	1540.93	-1.61358	0.292912	-5.50875	3.61e-08	1.22e-06
ENSGALG00000026687_PLCD4	66.6028	3.24767	0.59085	5.4966	3.87e-08	1.31e-06
ENSGALG00000015331_GNE	1785.07	-1.54164	0.281227	-5.48183	4.21e-08	1.42e-06
ENSGALG00000023689_ASS1	432.558	1.78095	0.324875	5.48196	4.21e-08	1.42e-06
ENSGALG00000016761_LYG2	117.72	-2.48887	0.454113	-5.48072	4.24e-08	1.42e-06
ENSGALG00000002159_ACOX1	7482.57	-1.62706	0.296979	-5.47871	4.28e-08	1.43e-06
ENSGALG00000015630_EDIL3	38.4056	4.31647	0.788227	5.47618	4.35e-08	1.45e-06
ENSGALG00000009442_ETFDH	1187.96	-1.47378	0.269776	-5.46297	4.68e-08	1.56e-06
ENSGALG00000005541_GJB1	307.938	-2.27201	0.415974	-5.46191	4.71e-08	1.56e-06
ENSGALG00000051512	32.6785	-4.44975	0.814699	-5.46183	4.71e-08	1.56e-06
ENSGALG00000053358	226.56	-1.92478	0.352744	-5.4566	4.85e-08	1.6e-06
ENSGALG00000016487_LDAH	1043.5	-1.66432	0.305259	-5.45216	4.98e-08	1.64e-06
ENSGALG00000033471_CALD1	8897.39	1.92541	0.354018	5.43874	5.37e-08	1.77e-06
ENSGALG00000027483_GLRX	582.526	-1.72345	0.317231	-5.43279	5.55e-08	1.82e-06
ENSGALG00000004562_HVCN1	466.981	1.95788	0.361139	5.42142	5.91e-08	1.94e-06
ENSGALG00000002588_PPARD	680.086	1.79128	0.330685	5.41686	6.07e-08	1.98e-06
ENSGALG00000001445_FABP6	3443.78	8.53794	1.57871	5.40819	6.37e-08	2.08e-06
ENSGALG00000012196_MCUB	1011.37	-1.49654	0.276783	-5.40692	6.41e-08	2.09e-06
ENSGALG00000003217_LITAF	382.559	-1.71838	0.317934	-5.40482	6.49e-08	2.1e-06
ENSGALG00000004222_HK1	1061.37	1.60882	0.297719	5.40383	6.52e-08	2.11e-06
ENSGALG00000004553_SGPL1	2491.16	-1.55886	0.288457	-5.40413	6.51e-08	2.11e-06
ENSGALG00000029617_COL17A1	146.27	-2.15522	0.399056	-5.40081	6.63e-08	2.14e-06
ENSGALG00000041013_TNS1	4252.25	1.5724	0.291731	5.38991	7.05e-08	2.27e-06
ENSGALG00000040260	2290.77	-1.67404	0.310824	-5.3858	7.21e-08	2.31e-06
ENSGALG00000042151	3179.11	-1.86498	0.346949	-5.37537	7.64e-08	2.45e-06
ENSGALG00000035237	1000.18	1.53243	0.285447	5.36853	7.94e-08	2.53e-06
ENSGALG00000007412_MPZL2	216.176	-2.0104	0.374871	-5.36292	8.19e-08	2.61e-06
ENSGALG00000030164_ECH1	1497.39	-1.52153	0.284272	-5.35237	8.68e-08	2.76e-06
ENSGALG00000008352_CKMT1B	3268.99	-1.5125	0.282691	-5.35035	8.78e-08	2.78e-06
ENSGALG00000008554_IL17REL	43.7733	4.09794	0.766557	5.3459	9e-08	2.84e-06
ENSGALG00000016858_SLC10A2	457.392	9.03461	1.69011	5.34558	9.01e-08	2.84e-06
ENSGALG00000041634_ACTG2	19890.1	2.13692	0.399938	5.34312	9.14e-08	2.88e-06
ENSGALG00000031058	84.9441	2.5922	0.485516	5.33906	9.34e-08	2.94e-06
ENSGALG00000053053_AQP8	230.812	11.0633	2.07603	5.32906	9.87e-08	3.09e-06
ENSGALG00000043064_EXFABP	109.15	2.47613	0.464848	5.32676	1e-07	3.13e-06
ENSGALG00000044330	743.662	-1.50784	0.283822	-5.31262	1.08e-07	3.37e-06
ENSGALG00000023521_ADRA2A	244.32	-2.06561	0.388904	-5.31136	1.09e-07	3.39e-06
ENSGALG00000003921_DBNDD2	701.12	1.52158	0.286528	5.31042	1.09e-07	3.4e-06
ENSGALG00000008409_GSTO2	977.703	-1.49415	0.281556	-5.30678	1.12e-07	3.46e-06
ENSGALG00000037286_VIL1	6667.08	-1.90174	0.358834	-5.29977	1.16e-07	3.59e-06
ENSGALG00000031932_AGPAT3	343.837	-1.63124	0.308575	-5.28638	1.25e-07	3.85e-06
ENSGALG00000017291_FAR2	704.646	1.61294	0.305214	5.28464	1.26e-07	3.88e-06
ENSGALG00000010432_GSTZ1	203.956	-2.06983	0.391817	-5.28264	1.27e-07	3.91e-06
ENSGALG00000003751	1126.17	-9.55142	1.8091	-5.27965	1.29e-07	3.97e-06
ENSGALG00000035017	446.735	1.74098	0.329781	5.2792	1.3e-07	3.97e-06
ENSGALG00000012425_FERMT2	962.709	1.74717	0.331024	5.27807	1.31e-07	3.98e-06
ENSGALG00000010645_ENPP6	1048.82	1.48516	0.28141	5.27758	1.31e-07	3.99e-06
ENSGALG00000016132_IGSF5	406.765	-1.8376	0.348238	-5.27684	1.31e-07	3.99e-06
ENSGALG00000033989_SLC39A14	887.454	-1.66247	0.31506	-5.27667	1.32e-07	3.99e-06
ENSGALG00000015960_RPIA	792.435	-1.48568	0.281815	-5.27184	1.35e-07	4.09e-06
ENSGALG00000030886_PTGDS	345.233	1.76433	0.335013	5.26645	1.39e-07	4.2e-06
ENSGALG00000049414_CYP2C23a	9700.56	-1.99343	0.378582	-5.26551	1.4e-07	4.21e-06
ENSGALG00000027513_HOXD9	38.8048	4.67259	0.888116	5.26124	1.43e-07	4.3e-06
ENSGALG00000047002	23.1898	-8.48438	1.61322	-5.25927	1.45e-07	4.34e-06
ENSGALG00000007582_DPYSL3	654.591	1.82714	0.347724	5.25457	1.48e-07	4.44e-06
ENSGALG00000005934	128.492	2.51556	0.479112	5.25046	1.52e-07	4.53e-06
ENSGALG00000032997_EMILIN2	611.876	2.547	0.485137	5.25007	1.52e-07	4.53e-06
ENSGALG00000007668_BMP7	201.236	2.30695	0.439638	5.24739	1.54e-07	4.59e-06
ENSGALG00000000067_SPR	265.226	-1.77791	0.33895	-5.24535	1.56e-07	4.63e-06
ENSGALG00000053903	52.3394	-4.12743	0.787245	-5.24288	1.58e-07	4.68e-06
ENSGALG00000031519_KHDRBS3	129.246	2.72368	0.519853	5.23932	1.61e-07	4.76e-06
ENSGALG00000005181	2446.37	-1.37922	0.26337	-5.23682	1.63e-07	4.81e-06
ENSGALG00000034500_CIDEA	1428.93	-1.62392	0.310097	-5.23681	1.63e-07	4.81e-06
ENSGALG00000027476_PLEKHG5	305.333	-1.75854	0.336142	-5.23154	1.68e-07	4.94e-06
ENSGALG00000035923_MTMR11	303.06	-1.86382	0.356356	-5.23023	1.69e-07	4.96e-06
ENSGALG00000019157_SMPX	208.401	2.49081	0.476449	5.22786	1.71e-07	5.01e-06
ENSGALG00000008933_CASP7	1260.07	-1.50037	0.287296	-5.22237	1.77e-07	5.15e-06
ENSGALG00000026396_BG1	730.212	-1.6082	0.307977	-5.22182	1.77e-07	5.16e-06
ENSGALG00000002729_GK5	160.301	-1.90685	0.36539	-5.21866	1.8e-07	5.24e-06
ENSGALG00000037665_LMBR1L	29.9556	-4.50839	0.86458	-5.21455	1.84e-07	5.34e-06
ENSGALG00000013768_PHACTR2	788.262	1.50455	0.28866	5.21219	1.87e-07	5.4e-06
ENSGALG00000041253_MYRF	463.525	-2.05278	0.393896	-5.21149	1.87e-07	5.41e-06
ENSGALG00000035184_SDC3	164.846	2.03889	0.391709	5.20511	1.94e-07	5.59e-06
ENSGALG00000046338_PYY	25.8198	-8.31304	1.59915	-5.19843	2.01e-07	5.78e-06
ENSGALG00000038678_EPB41L3	1781.12	-1.37516	0.264945	-5.19035	2.1e-07	6.02e-06
ENSGALG00000004503	459.489	-1.53374	0.295998	-5.18159	2.2e-07	6.3e-06
ENSGALG00000043513_TEAD3	246.244	1.77005	0.34231	5.17091	2.33e-07	6.66e-06
ENSGALG00000008621_NRP2	748.634	1.48909	0.289278	5.1476	2.64e-07	7.53e-06
ENSGALG00000045809	2724.13	-2.02986	0.394376	-5.14702	2.65e-07	7.53e-06
ENSGALG00000007251_PCYT2	1768.21	-1.60294	0.311849	-5.1401	2.75e-07	7.78e-06
ENSGALG00000042095_NR1I3	131.18	-2.08343	0.405309	-5.14035	2.74e-07	7.78e-06
ENSGALG00000049812_SLC66A2	485.145	1.67084	0.325497	5.1332	2.85e-07	8.06e-06
ENSGALG00000001546_ZZEF1	5988.32	-1.55601	0.303265	-5.13087	2.88e-07	8.14e-06
ENSGALG00000005702_TMEM97	717.649	-1.45883	0.284406	-5.12941	2.91e-07	8.19e-06
ENSGALG00000004956_GPI	2593.59	-1.42879	0.278868	-5.12353	3e-07	8.43e-06
ENSGALG00000028265_SURF4	1796.61	-1.38126	0.269631	-5.12276	3.01e-07	8.45e-06
ENSGALG00000045085_IFIT5	315.132	-2.49885	0.487836	-5.12231	3.02e-07	8.45e-06
ENSGALG00000031013_DHDH	125.626	-2.09714	0.409995	-5.11503	3.14e-07	8.77e-06
ENSGALG00000026137_CDKN2B	1243.12	-2.09912	0.410693	-5.11115	3.2e-07	8.93e-06
ENSGALG00000007666_KCNIP2	54.4485	3.4706	0.680346	5.10124	3.37e-07	9.38e-06
ENSGALG00000045738	775.521	-1.49746	0.293559	-5.10106	3.38e-07	9.38e-06
ENSGALG00000007840	965.308	-1.70088	0.333557	-5.09924	3.41e-07	9.46e-06
ENSGALG00000042388	97.1385	2.48989	0.488535	5.09665	3.46e-07	9.57e-06
ENSGALG00000042474_FOXD2	39.1325	6.00002	1.17746	5.09574	3.47e-07	9.59e-06
ENSGALG00000044226	45.1152	3.80757	0.747439	5.09415	3.5e-07	9.66e-06
ENSGALG00000036836_SOSTDC1	87.6734	-2.74144	0.538217	-5.09356	3.51e-07	9.67e-06
ENSGALG00000015211_DTNA	230.186	1.8955	0.372405	5.08989	3.58e-07	9.84e-06
ENSGALG00000035751_ONECUT2	29.0191	-6.09245	1.19966	-5.07848	3.8e-07	1.04e-05
ENSGALG00000005647_ABCD3	3046.55	-1.59245	0.313718	-5.07604	3.85e-07	1.05e-05
ENSGALG00000035850_CSAD	915.822	-1.67689	0.330335	-5.07632	3.85e-07	1.05e-05
ENSGALG00000042984	1214.45	-1.63325	0.322694	-5.06131	4.16e-07	1.13e-05
ENSGALG00000002412_GBA2	1899.44	-1.38213	0.273203	-5.05901	4.21e-07	1.15e-05
ENSGALG00000012952_BASP1	1293.6	1.69104	0.334335	5.05793	4.24e-07	1.15e-05
ENSGALG00000004465_PALD1	670.98	1.65956	0.328554	5.0511	4.39e-07	1.19e-05
ENSGALG00000041266_CNN1	6270.21	1.97046	0.390423	5.04698	4.49e-07	1.21e-05
ENSGALG00000008970_NRK	1859.01	1.4153	0.280782	5.04056	4.64e-07	1.25e-05
ENSGALG00000038162_FAM26E	97.6294	2.3133	0.459143	5.03831	4.7e-07	1.26e-05
ENSGALG00000036990_DECR1	2279.94	-1.52498	0.303562	-5.02362	5.07e-07	1.36e-05
ENSGALG00000036196_MTCH2	829.595	-1.55814	0.310339	-5.02077	5.15e-07	1.38e-05
ENSGALG00000028560_OC3	154.969	2.14732	0.427976	5.01739	5.24e-07	1.4e-05
ENSGALG00000005521_PER2	2377.51	-1.39225	0.277729	-5.01297	5.36e-07	1.43e-05
ENSGALG00000042099	31.769	-4.82754	0.962954	-5.01326	5.35e-07	1.43e-05
ENSGALG00000042773_VOPP1	76.3528	2.51687	0.502041	5.01328	5.35e-07	1.43e-05
ENSGALG00000053254_EHHADH	2295.61	-1.87853	0.375239	-5.00623	5.55e-07	1.47e-05
ENSGALG00000000619_ANGPTL4	347.53	-1.96014	0.392135	-4.99863	5.77e-07	1.53e-05
ENSGALG00000010785_ACOT11	910.702	-1.70279	0.341651	-4.984	6.23e-07	1.65e-05
ENSGALG00000010357_P2RY1	203.929	-1.73213	0.347625	-4.98276	6.27e-07	1.66e-05
ENSGALG00000012112_DBI	2014.83	-1.36749	0.274686	-4.9784	6.41e-07	1.69e-05
ENSGALG00000004088_FNBP1	1581.96	1.35749	0.273284	4.96734	6.79e-07	1.78e-05
ENSGALG00000006992_MMP9	37.2503	3.67202	0.739228	4.96737	6.79e-07	1.78e-05
ENSGALG00000038589_ABHD14B	550.922	-1.84635	0.371865	-4.9651	6.87e-07	1.8e-05
ENSGALG00000005985_GDF10	51.4546	2.94557	0.593341	4.96438	6.89e-07	1.8e-05
ENSGALG00000029484_RIC8B	1999.59	-1.43085	0.288446	-4.96057	7.03e-07	1.84e-05
ENSGALG00000028982_CMPK2	270.347	-2.00401	0.404244	-4.95742	7.14e-07	1.86e-05
ENSGALG00000004449_CYP3A5	5988.76	-2.31305	0.467077	-4.95218	7.34e-07	1.91e-05
ENSGALG00000010664_KIF26B	205.153	1.83616	0.370786	4.95209	7.34e-07	1.91e-05
ENSGALG00000015720_CHODL	30.229	-5.99355	1.21074	-4.9503	7.41e-07	1.92e-05
ENSGALG00000038399_PLEKHA6	760.591	1.40317	0.283686	4.9462	7.57e-07	1.96e-05
ENSGALG00000004899_PEPD	3797.11	-1.60902	0.325537	-4.94266	7.71e-07	1.99e-05
ENSGALG00000001153_AUTS2	294.921	-1.8962	0.383748	-4.94126	7.76e-07	2e-05
ENSGALG00000004068_FAM114A2	690.331	-1.4286	0.289148	-4.9407	7.78e-07	2e-05
ENSGALG00000050515	32.3521	5.88893	1.19195	4.9406	7.79e-07	2e-05
ENSGALG00000048205	270.54	-1.99503	0.403935	-4.93898	7.85e-07	2.01e-05
ENSGALG00000051383	528.509	-1.48814	0.301573	-4.93458	8.03e-07	2.06e-05
ENSGALG00000016196	1176.15	8.83285	1.79112	4.93147	8.16e-07	2.08e-05
ENSGALG00000052771	36.36	-4.78952	0.971497	-4.93004	8.22e-07	2.1e-05
ENSGALG00000009722_DYNC1I1	149.929	1.96426	0.398569	4.92828	8.3e-07	2.11e-05
ENSGALG00000032143_CRISPLD2	280.573	1.63274	0.331636	4.9233	8.51e-07	2.16e-05
ENSGALG00000017205_ENDOD1	85.0635	2.33182	0.473785	4.9217	8.58e-07	2.18e-05
ENSGALG00000015593_EPHA7	54.6239	3.01272	0.613016	4.91459	8.9e-07	2.25e-05
ENSGALG00000011962_NDNF	263.062	1.73087	0.352699	4.90749	9.22e-07	2.33e-05
ENSGALG00000035086	33019.9	1.33801	0.273013	4.90091	9.54e-07	2.41e-05
ENSGALG00000046481	311.423	1.67654	0.342401	4.89641	9.76e-07	2.46e-05
ENSGALG00000009670_SGCE	452.346	1.72736	0.352861	4.89529	9.82e-07	2.47e-05
ENSGALG00000052156	256.658	-2.20711	0.45151	-4.88829	1.02e-06	2.55e-05
ENSGALG00000001933_CORO2A	1283.44	-1.40445	0.287495	-4.88511	1.03e-06	2.58e-05
ENSGALG00000037443_CRAT	1431.7	-1.35296	0.276957	-4.8851	1.03e-06	2.58e-05
ENSGALG00000027365_HIVEP3	389.262	1.67817	0.343619	4.88383	1.04e-06	2.6e-05
ENSGALG00000008902_GIPC2	1344.12	-1.34405	0.275519	-4.87825	1.07e-06	2.66e-05
ENSGALG00000013969_ALDH8A1	47.2277	-3.18635	0.653648	-4.87472	1.09e-06	2.71e-05
ENSGALG00000033017_C2orf88	82.6658	2.38208	0.488784	4.87349	1.1e-06	2.72e-05
ENSGALG00000047998	86.2108	2.21904	0.455993	4.86638	1.14e-06	2.81e-05
ENSGALG00000050097	61.2568	-2.54472	0.522992	-4.8657	1.14e-06	2.82e-05
ENSGALG00000032679_GCSH	433.598	-1.52611	0.313787	-4.86351	1.15e-06	2.85e-05
ENSGALG00000002891_ACADL	3814.73	-1.35072	0.277783	-4.86249	1.16e-06	2.86e-05
ENSGALG00000037014_TSNARE1	177.019	1.88878	0.388945	4.85617	1.2e-06	2.94e-05
ENSGALG00000031734_AQP11	307.895	-1.56216	0.322307	-4.84681	1.25e-06	3.08e-05
ENSGALG00000050380_TMPPE	643.672	-1.46379	0.302266	-4.84272	1.28e-06	3.14e-05
ENSGALG00000023772_HSPB7	83.9409	2.40632	0.496991	4.84178	1.29e-06	3.15e-05
ENSGALG00000012944_DENND5B	528.461	-1.66329	0.343689	-4.83951	1.3e-06	3.18e-05
ENSGALG00000011608	244.077	1.67628	0.346576	4.8367	1.32e-06	3.22e-05
ENSGALG00000006543_PFKL	713.243	-1.44289	0.298538	-4.8332	1.34e-06	3.27e-05
ENSGALG00000015263	382.422	-1.67994	0.34781	-4.83007	1.36e-06	3.32e-05
ENSGALG00000003172_SLC16A9	1276.34	1.53768	0.318425	4.82902	1.37e-06	3.33e-05
ENSGALG00000041795_WWP1	751.209	-1.34992	0.279674	-4.82679	1.39e-06	3.36e-05
ENSGALG00000048606	33.7689	-4.40198	0.914164	-4.8153	1.47e-06	3.55e-05
ENSGALG00000010903_RASGEF1B	146.321	1.9896	0.41376	4.8086	1.52e-06	3.67e-05
ENSGALG00000010150_SEC23A	1663.98	-1.26873	0.264269	-4.8009	1.58e-06	3.8e-05
ENSGALG00000005722_SEC31B	1284.19	-1.2877	0.268316	-4.79919	1.59e-06	3.83e-05
ENSGALG00000000919_PIGR	18684.1	-1.2873	0.268359	-4.79693	1.61e-06	3.87e-05
ENSGALG00000030703_CYBRD1	667.734	1.53814	0.320674	4.79656	1.61e-06	3.87e-05
ENSGALG00000016791_SLC9A2	3057.46	-1.43891	0.300329	-4.79109	1.66e-06	3.97e-05
ENSGALG00000035636_PHYH	366.938	-2.14569	0.448625	-4.78281	1.73e-06	4.13e-05
ENSGALG00000011875_TRPC3	40.3659	3.61544	0.756748	4.77759	1.77e-06	4.23e-05
ENSGALG00000054718_FLNA	1884.23	1.41296	0.295822	4.77638	1.78e-06	4.25e-05
ENSGALG00000013022_CACNA1C	594.003	1.49818	0.313732	4.77534	1.79e-06	4.26e-05
ENSGALG00000015485_ACP6	334.895	-1.4972	0.313851	-4.77041	1.84e-06	4.36e-05
ENSGALG00000008508_PYGB	1951.47	1.44816	0.303603	4.76993	1.84e-06	4.36e-05
ENSGALG00000004357_ANXA6	2563.83	1.55489	0.326037	4.76906	1.85e-06	4.37e-05
ENSGALG00000007346_JCAD	1589.79	1.44756	0.30374	4.76577	1.88e-06	4.44e-05
ENSGALG00000036500	214.748	-2.0091	0.421811	-4.76303	1.91e-06	4.49e-05
ENSGALG00000014847_MYOM1	118.022	-1.88848	0.397656	-4.74904	2.04e-06	4.81e-05
ENSGALG00000001936_MYO7B	939.988	-1.31308	0.276716	-4.74525	2.08e-06	4.89e-05
ENSGALG00000040619_BAAT	626.36	-2.15167	0.453763	-4.74184	2.12e-06	4.96e-05
ENSGALG00000008744_MCF2L2	205.349	2.01167	0.424275	4.74142	2.12e-06	4.96e-05
ENSGALG00000003537_SGK2	52.3175	3.88296	0.819498	4.73822	2.16e-06	5.04e-05
ENSGALG00000008385_PPIP5K1	539.914	-1.40088	0.295876	-4.73468	2.19e-06	5.12e-05
ENSGALG00000008098_NAMPTP1	846.472	-1.47233	0.311648	-4.72433	2.31e-06	5.37e-05
ENSGALG00000015345	986.597	-1.45453	0.308045	-4.72181	2.34e-06	5.43e-05
ENSGALG00000016205_PDXK	1092.88	-1.40375	0.297327	-4.72123	2.34e-06	5.43e-05
ENSGALG00000054330	77.6369	-2.27343	0.481501	-4.72155	2.34e-06	5.43e-05
ENSGALG00000036728_PRDM16	111.786	-2.40575	0.509842	-4.71863	2.37e-06	5.49e-05
ENSGALG00000014646_SYT11	313.725	1.57688	0.334217	4.71813	2.38e-06	5.49e-05
ENSGALG00000027908_CYP2U1	745.291	-2.08554	0.442457	-4.71356	2.43e-06	5.61e-05
ENSGALG00000016281_DMD	3312.5	1.44059	0.3057	4.71242	2.45e-06	5.63e-05
ENSGALG00000011008_MAP3K21	428.811	-1.60213	0.340185	-4.70958	2.48e-06	5.7e-05
ENSGALG00000012697_SLC41A2	283.933	-1.6188	0.34386	-4.70772	2.51e-06	5.74e-05
ENSGALG00000035761	71.8079	-2.36926	0.503598	-4.70468	2.54e-06	5.82e-05
ENSGALG00000026422	1369.11	-1.34241	0.285377	-4.70398	2.55e-06	5.83e-05
ENSGALG00000008337	142.522	-1.84427	0.392217	-4.70218	2.57e-06	5.87e-05
ENSGALG00000004663_ARFGEF2	1396.39	-1.28906	0.274336	-4.69885	2.62e-06	5.95e-05
ENSGALG00000042929_GJC3	128.088	-1.94065	0.412992	-4.69899	2.61e-06	5.95e-05
ENSGALG00000004078	444.989	-1.63811	0.348842	-4.69587	2.65e-06	6.03e-05
ENSGALG00000031533	36.4944	4.29374	0.916767	4.68357	2.82e-06	6.39e-05
ENSGALG00000032336_SLC25A10	245.804	-1.78143	0.380522	-4.68154	2.85e-06	6.44e-05
ENSGALG00000006702_MFGE8	968.146	1.28999	0.275705	4.67887	2.88e-06	6.52e-05
ENSGALG00000016925_TBC1D4	261.187	1.55658	0.332885	4.67603	2.92e-06	6.6e-05
ENSGALG00000016485_RHOB	789.463	1.41698	0.303356	4.67101	3e-06	6.75e-05
ENSGALG00000012355_DARS	940.323	-1.39524	0.298897	-4.66796	3.04e-06	6.84e-05
ENSGALG00000007522	524.802	1.53107	0.328217	4.66481	3.09e-06	6.93e-05
ENSGALG00000000498_ACE	12072.3	-2.09175	0.449472	-4.65379	3.26e-06	7.3e-05
ENSGALG00000017046_POSTN	682.184	1.98235	0.42646	4.64838	3.35e-06	7.49e-05
ENSGALG00000004196	4310.39	-1.55888	0.335503	-4.64639	3.38e-06	7.55e-05
ENSGALG00000015115_MAMDC2	747.218	1.51204	0.325812	4.64082	3.47e-06	7.74e-05
ENSGALG00000030220_ELMO3	444.127	-1.53082	0.330148	-4.63677	3.54e-06	7.88e-05
ENSGALG00000008722_MCOLN2	116.767	1.98147	0.42756	4.63436	3.58e-06	7.96e-05
ENSGALG00000011443_EXOC3L4	540.079	-1.52943	0.330235	-4.63134	3.63e-06	8.07e-05
ENSGALG00000034960_MLXIPL	465.245	-1.6523	0.356823	-4.63059	3.65e-06	8.08e-05
ENSGALG00000016665_FDFT1	475.638	-1.88637	0.407697	-4.6269	3.71e-06	8.21e-05
ENSGALG00000027096_LGALSL	320.228	-1.79244	0.387792	-4.62216	3.8e-06	8.39e-05
ENSGALG00000029909_DHDDS	741.698	-1.33482	0.288896	-4.62041	3.83e-06	8.45e-05
ENSGALG00000005249_BICD2	1790.52	1.31773	0.285839	4.61003	4.03e-06	8.87e-05
ENSGALG00000030776_METTL7A	64.9722	2.4291	0.52761	4.60398	4.14e-06	9.11e-05
ENSGALG00000039629_HOXD11	40.4038	7.08979	1.54054	4.60215	4.18e-06	9.18e-05
ENSGALG00000042001	333.026	-2.08849	0.454199	-4.59817	4.26e-06	9.34e-05
ENSGALG00000006723	301.085	-2.05526	0.447117	-4.5967	4.29e-06	9.39e-05
ENSGALG00000005589_SYNGR3	435.869	1.48611	0.323428	4.59488	4.33e-06	9.46e-05
ENSGALG00000003261_PTRF	4173.22	1.61223	0.351103	4.5919	4.39e-06	9.58e-05
ENSGALG00000042321_LYN	1236.48	-1.24312	0.270798	-4.59059	4.42e-06	9.63e-05
ENSGALG00000048578	24.5403	-4.8502	1.05727	-4.58749	4.49e-06	9.76e-05
ENSGALG00000006167_LRRC8B	592.268	-1.41793	0.309219	-4.58553	4.53e-06	9.82e-05
ENSGALG00000014948_HMGCR	1836.22	-1.47071	0.320753	-4.58518	4.54e-06	9.82e-05
ENSGALG00000050586_ILVBL	495.419	-1.7252	0.376266	-4.58506	4.54e-06	9.82e-05
ENSGALG00000030419_GLS2	384.396	1.50812	0.32915	4.58185	4.61e-06	9.96e-05
ENSGALG00000041687_SREBF2	1391.16	-1.36391	0.297748	-4.58076	4.63e-06	0.0001
ENSGALG00000026077_ALDOC	2358.53	1.41646	0.309837	4.57163	4.84e-06	0.00010427
ENSGALG00000039786_FGFR1	334.164	1.48941	0.326182	4.56618	4.97e-06	0.00010686
ENSGALG00000003521_TPM1	17199	1.39649	0.305882	4.56544	4.98e-06	0.00010707
ENSGALG00000015078_MLLT3	132.489	1.81662	0.397981	4.5646	5e-06	0.00010733
ENSGALG00000026471_CRIP2	154.198	1.8229	0.399491	4.56307	5.04e-06	0.00010795
ENSGALG00000031117_STK17A	117.752	1.93596	0.424443	4.56117	5.09e-06	0.00010877
ENSGALG00000010926_SPP1	33.367	5.80384	1.27417	4.55501	5.24e-06	0.00011183
ENSGALG00000054173	330.406	-1.52034	0.334073	-4.55092	5.34e-06	0.00011385
ENSGALG00000007886	121.4	1.99218	0.438634	4.54178	5.58e-06	0.00011872
ENSGALG00000033966_TENM4	349.973	1.48273	0.326612	4.53972	5.63e-06	0.00011952
ENSGALG00000037889_PTPRT	42.115	3.49546	0.769925	4.54	5.63e-06	0.00011952
ENSGALG00000030187_CAT	4857.29	-1.49142	0.328555	-4.53933	5.64e-06	0.00011956
ENSGALG00000008135_SATB2	379.428	5.07296	1.1182	4.53671	5.71e-06	0.00012087
ENSGALG00000053095_PC	257.966	-1.47854	0.326035	-4.53492	5.76e-06	0.00012171
ENSGALG00000026089_SLC26A6	409.458	-5.26079	1.16027	-4.5341	5.78e-06	0.000122
ENSGALG00000034171_EPB41L1	853.591	1.62008	0.357356	4.53351	5.8e-06	0.00012216
ENSGALG00000050058_REEP1	427.767	1.40856	0.310964	4.52966	5.91e-06	0.00012403
ENSGALG00000053107	51.9882	2.7522	0.607554	4.52997	5.9e-06	0.00012403
ENSGALG00000008222_SLC26A5	678.55	1.59019	0.351237	4.52739	5.97e-06	0.00012518
ENSGALG00000036286	128.251	1.86872	0.412838	4.52652	6e-06	0.00012551
ENSGALG00000004355_MCU	971.494	-1.32053	0.292016	-4.5221	6.12e-06	0.00012797
ENSGALG00000002142_DGKQ	433.466	-1.35123	0.29888	-4.52098	6.16e-06	0.00012845
ENSGALG00000013377_LMBRD2	817.894	-1.37736	0.304714	-4.52018	6.18e-06	0.00012874
ENSGALG00000040275_RCSD1	563.954	1.37789	0.305271	4.51367	6.37e-06	0.00013257
ENSGALG00000001203_TMEM45B	454.296	-1.33093	0.294997	-4.51169	6.43e-06	0.00013361
ENSGALG00000011318_DNPEP	769.834	-1.48765	0.329835	-4.5103	6.47e-06	0.00013429
ENSGALG00000039238_SALL1	212.908	1.64103	0.364442	4.50286	6.7e-06	0.00013887
ENSGALG00000012197_ACMSD	31.3727	-3.64573	0.810318	-4.49913	6.82e-06	0.00014112
ENSGALG00000008858_MDH1	1843.29	-1.35499	0.301273	-4.49754	6.87e-06	0.00014197
ENSGALG00000041091_ATP6	17589.7	-1.32515	0.294735	-4.49609	6.92e-06	0.00014272
ENSGALG00000026864_ZCCHC24	141.599	1.76081	0.391872	4.49333	7.01e-06	0.00014437
ENSGALG00000028174_CAVIN2	3486.34	1.37493	0.306224	4.48995	7.12e-06	0.00014647
ENSGALG00000007645	822.339	-1.35902	0.302782	-4.48845	7.17e-06	0.00014729
ENSGALG00000048104	55.6968	-2.92936	0.652925	-4.48652	7.24e-06	0.00014841
ENSGALG00000041663_KLB	298.08	-1.68089	0.374941	-4.48307	7.36e-06	0.00015061
ENSGALG00000002467_MTSS2	383.543	1.61461	0.36057	4.47793	7.54e-06	0.00015405
ENSGALG00000014140_ARFGAP3	912.212	-1.35001	0.301506	-4.47758	7.55e-06	0.00015408
ENSGALG00000015197_SLC35A5	271.339	-1.57744	0.352919	-4.46971	7.83e-06	0.00015958
ENSGALG00000043047_SOBP	88.5648	2.18337	0.48851	4.46946	7.84e-06	0.00015958
ENSGALG00000000737_SMPDL3B	231.73	-1.84554	0.41308	-4.46776	7.9e-06	0.00016047
ENSGALG00000034303_C1orf115	1901	-1.3012	0.29125	-4.46764	7.91e-06	0.00016047
ENSGALG00000037200	427.728	-1.48471	0.332495	-4.46538	7.99e-06	0.00016194
ENSGALG00000028341	149.696	1.81142	0.405798	4.46384	8.05e-06	0.00016286
ENSGALG00000029983_ANGPT1	117.277	1.99489	0.446984	4.46299	8.08e-06	0.00016328
ENSGALG00000002169_PLEKHB2	2384.35	1.39821	0.31346	4.46058	8.17e-06	0.00016489
ENSGALG00000004280	42.7239	-2.74174	0.614825	-4.45938	8.22e-06	0.00016533
ENSGALG00000008844_SLC31A1	1736.56	-1.3061	0.292889	-4.45936	8.22e-06	0.00016533
ENSGALG00000036915_SQLE	185.958	-2.0925	0.469268	-4.45908	8.23e-06	0.00016533
ENSGALG00000049067	58.5569	2.43128	0.545326	4.45839	8.26e-06	0.00016562
ENSGALG00000002500_GMPPB	663.513	-1.41142	0.316691	-4.45678	8.32e-06	0.00016662
ENSGALG00000007585_NIT1	282.296	-1.50966	0.339305	-4.44926	8.62e-06	0.00017232
ENSGALG00000012186_CASP6	494.761	-1.2966	0.291569	-4.44697	8.71e-06	0.00017392
ENSGALG00000008591_CACNB2	316.093	1.399	0.314935	4.44219	8.9e-06	0.00017758
ENSGALG00000010494_SLC5A9	169.076	-1.72269	0.388111	-4.43864	9.05e-06	0.00018027
ENSGALG00000019352	291.028	-1.496	0.337104	-4.4378	9.09e-06	0.00018071
ENSGALG00000038143	515.029	-1.39057	0.313736	-4.4323	9.32e-06	0.00018513
ENSGALG00000017191_ANGPTL5	62.8011	2.35375	0.531117	4.4317	9.35e-06	0.00018538
ENSGALG00000014681_PCSK1	475.198	-1.57883	0.356438	-4.42948	9.45e-06	0.00018703
ENSGALG00000007260_ZEB1	1253.17	1.36722	0.308837	4.42699	9.56e-06	0.00018866
ENSGALG00000028880_FDPS	361.288	-1.80078	0.406761	-4.42713	9.55e-06	0.00018866
ENSGALG00000010638_CASP3	833.931	-1.30254	0.294441	-4.42379	9.7e-06	0.00019109
ENSGALG00000044343	546.757	-1.42446	0.322014	-4.42361	9.71e-06	0.00019109
ENSGALG00000031212_MGAT2	297.167	-1.45935	0.329969	-4.42269	9.75e-06	0.00019164
ENSGALG00000014862_HMGCS1	565.808	-1.9795	0.447772	-4.42078	9.83e-06	0.00019307
ENSGALG00000032142_MT-CO1	117061	-1.15136	0.260461	-4.42048	9.85e-06	0.00019307
ENSGALG00000038722_SORBS1	2019.09	1.37766	0.311687	4.42003	9.87e-06	0.0001932
ENSGALG00000036355_C7orf73	267.441	-1.44211	0.326719	-4.41391	1.02e-05	0.00019846
ENSGALG00000007526	170.679	-1.92995	0.437415	-4.41217	1.02e-05	0.00019979
ENSGALG00000000438_ERMP1	270.32	-1.4426	0.327248	-4.40829	1.04e-05	0.00020311
ENSGALG00000005519_TLL2	319.187	2.20846	0.502074	4.39868	1.09e-05	0.00021201
ENSGALG00000012684_DEK	889.523	-1.22145	0.277767	-4.39738	1.1e-05	0.00021299
ENSGALG00000005467_HSD17B2	39.876	3.35011	0.76217	4.39548	1.11e-05	0.00021456
ENSGALG00000005209_AQP1	442.025	1.79568	0.408637	4.39431	1.11e-05	0.00021542
ENSGALG00000017208_AMOTL1	263.234	1.50846	0.343385	4.39291	1.12e-05	0.00021652
ENSGALG00000011172	394.432	1.33295	0.304166	4.38231	1.17e-05	0.00022701
ENSGALG00000053606	31.905	-3.26357	0.744954	-4.3809	1.18e-05	0.00022817
ENSGALG00000019555_SERPINB1	342.214	-1.5503	0.354085	-4.37831	1.2e-05	0.00023058
ENSGALG00000002371_RUSC2	316.781	1.58476	0.362037	4.37736	1.2e-05	0.00023127
ENSGALG00000009545_SLC25A12	280.767	1.41184	0.322596	4.37649	1.21e-05	0.00023155
ENSGALG00000042073	14.7278	-7.58068	1.73214	-4.37649	1.21e-05	0.00023155
ENSGALG00000015626	368.011	1.52216	0.348023	4.37372	1.22e-05	0.00023418
ENSGALG00000011350_NEGR1	66.8607	2.75072	0.629306	4.37105	1.24e-05	0.00023674
ENSGALG00000005632_MRVI1	464.127	1.50418	0.344225	4.36976	1.24e-05	0.00023782
ENSGALG00000010043_RBKS	316.604	-1.44916	0.331792	-4.36768	1.26e-05	0.00023963
ENSGALG00000016324_GSTA4	719.736	1.39756	0.31999	4.3675	1.26e-05	0.00023963
ENSGALG00000009628	298.927	1.3997	0.32098	4.3607	1.3e-05	0.00024686
ENSGALG00000010924_NFIA	958.278	1.22447	0.280984	4.35778	1.31e-05	0.00024984
ENSGALG00000013101	153.766	-1.96323	0.450815	-4.35485	1.33e-05	0.00025285
ENSGALG00000010166_VLDLR	384.225	1.40672	0.323413	4.34961	1.36e-05	0.00025863
ENSGALG00000009732_PCDH18	258.198	1.80325	0.414768	4.34761	1.38e-05	0.00026063
ENSGALG00000010001_EGLN3	463.263	-1.62445	0.373679	-4.34718	1.38e-05	0.00026079
ENSGALG00000006655_MAP3K13	1046.47	-1.19933	0.276232	-4.34175	1.41e-05	0.00026696
ENSGALG00000006192_USH1C	1689	-1.15143	0.265468	-4.33737	1.44e-05	0.00027197
ENSGALG00000033709_LTA4H	2609.99	-1.12334	0.259235	-4.33329	1.47e-05	0.00027668
ENSGALG00000008487_TMCC1	668.405	-1.27771	0.295005	-4.33115	1.48e-05	0.000279
ENSGALG00000043768_MT-ND2	19076.6	-1.22584	0.283422	-4.32516	1.52e-05	0.00028631
ENSGALG00000004005_AKR7L	3137.08	-1.19729	0.276841	-4.32483	1.53e-05	0.00028635
ENSGALG00000030139	546.413	-1.96374	0.454121	-4.32427	1.53e-05	0.00028669
ENSGALG00000006062_ZBTB46	432.074	1.30608	0.302118	4.32308	1.54e-05	0.00028747
ENSGALG00000014201_PARVB	88.0167	2.07366	0.479656	4.32322	1.54e-05	0.00028747
ENSGALG00000031762_TMEM98	51.1361	-2.78976	0.645493	-4.32191	1.55e-05	0.00028862
ENSGALG00000014813_HOMER1	71.0397	2.17906	0.504476	4.31944	1.56e-05	0.00029147
ENSGALG00000010875_ITGB8	354.667	1.48531	0.344005	4.3177	1.58e-05	0.00029338
ENSGALG00000016415_MAP7D2	892.261	-1.19546	0.277094	-4.31429	1.6e-05	0.00029755
ENSGALG00000034860_BCHE	4706.82	-1.44546	0.335161	-4.31274	1.61e-05	0.00029925
ENSGALG00000016833_F7	30.8334	-3.07815	0.713863	-4.31196	1.62e-05	0.00029951
ENSGALG00000031373_PADI3	49.2716	2.66667	0.61843	4.312	1.62e-05	0.00029951
ENSGALG00000037506_SIPA1L2	371.057	1.49402	0.346661	4.30974	1.63e-05	0.00030213
ENSGALG00000008076_TMEM164	268.94	1.45991	0.339121	4.305	1.67e-05	0.00030825
ENSGALG00000003939_KLF2	313.21	1.51394	0.351878	4.30244	1.69e-05	0.00031143
ENSGALG00000006393	492.627	-1.76291	0.409785	-4.30202	1.69e-05	0.00031161
ENSGALG00000036956	1.05445e+06	-1.55564	0.361806	-4.29966	1.71e-05	0.00031453
ENSGALG00000006705	822.471	1.33747	0.311093	4.29926	1.71e-05	0.00031468
ENSGALG00000036925_CADM3	277.634	1.50744	0.351202	4.29221	1.77e-05	0.00032441
ENSGALG00000014297_IRF7	205.316	-1.94817	0.455069	-4.28104	1.86e-05	0.00034069
ENSGALG00000011740_MGP	1842.79	1.35622	0.316906	4.27955	1.87e-05	0.00034252
ENSGALG00000031538_PI4K2B	1023.03	-1.22532	0.286362	-4.27893	1.88e-05	0.00034303
ENSGALG00000007132_ACOX2	731.614	-1.23441	0.288709	-4.27564	1.91e-05	0.00034769
ENSGALG00000037138_KCNQ1	341.618	1.59372	0.372911	4.27374	1.92e-05	0.0003502
ENSGALG00000052526	202.494	1.58313	0.371073	4.26635	1.99e-05	0.00036152
ENSGALG00000038301_NIPSNAP1	340.752	-1.3911	0.32612	-4.26562	1.99e-05	0.00036224
ENSGALG00000026159_PDLIM7	639.367	1.60492	0.376382	4.26406	2.01e-05	0.0003643
ENSGALG00000009158_CDC42BPA	2192.04	1.30709	0.306638	4.26266	2.02e-05	0.00036612
ENSGALG00000002427_SMIM5	305.826	-1.34766	0.316212	-4.26191	2.03e-05	0.00036683
ENSGALG00000034050	1074.45	-1.15259	0.270475	-4.26135	2.03e-05	0.00036683
ENSGALG00000036498_EHD2	938.927	1.64584	0.386215	4.26146	2.03e-05	0.00036683
ENSGALG00000034358	1256.35	-1.57634	0.370109	-4.25912	2.05e-05	0.00037004
ENSGALG00000006202_SCNN1B	44.3352	4.30569	1.01166	4.25605	2.08e-05	0.00037466
ENSGALG00000041978_K123	44.4481	3.08426	0.725355	4.25207	2.12e-05	0.00038089
ENSGALG00000011738_ARHGDIB	586.107	1.25173	0.29493	4.24415	2.19e-05	0.00039409
ENSGALG00000005088_CAMK2G	200.7	1.47708	0.348058	4.24378	2.2e-05	0.00039423
ENSGALG00000006454_SLC22A18	196.223	-1.58709	0.374061	-4.24286	2.21e-05	0.00039533
ENSGALG00000000887_NR0B2	533.448	-2.01271	0.474739	-4.23961	2.24e-05	0.00040058
ENSGALG00000014421_LCORL	629.264	-1.21832	0.287648	-4.23544	2.28e-05	0.00040757
ENSGALG00000007331_SVIL	5439.22	1.12138	0.265156	4.22915	2.35e-05	0.00041859
ENSGALG00000036739_UBE2L3	1914.92	-1.1351	0.268711	-4.22423	2.4e-05	0.00042729
ENSGALG00000047909	183.414	-2.03017	0.481199	-4.21898	2.45e-05	0.0004368
ENSGALG00000041502_ANGPT1L	1377.64	-1.36975	0.324853	-4.21652	2.48e-05	0.00044104
ENSGALG00000016536_HADHA	2662.05	-1.14041	0.270809	-4.21111	2.54e-05	0.00045116
ENSGALG00000013684_SGCZ	17.6402	7.28599	1.73035	4.2107	2.55e-05	0.0004514
ENSGALG00000017005_CAB39L	1182.02	1.34662	0.319859	4.21003	2.55e-05	0.00045216
ENSGALG00000004889_SLC2A1	277.213	1.35714	0.322479	4.20845	2.57e-05	0.00045476
ENSGALG00000007038_ASTN2	45.5657	2.92293	0.695328	4.20367	2.63e-05	0.00046389
ENSGALG00000005237_FGD3	1800.4	-1.27079	0.302499	-4.20098	2.66e-05	0.00046884
ENSGALG00000000255_MAN2A1	1726.03	-1.16395	0.277258	-4.19809	2.69e-05	0.00047427
ENSGALG00000047077_SLC25A1	887.893	-1.15749	0.275799	-4.19686	2.71e-05	0.00047625
ENSGALG00000015598_RASGRF2	130.336	-1.62689	0.388293	-4.18986	2.79e-05	0.00049055
ENSGALG00000032506_GEM	500.617	1.52199	0.363302	4.18934	2.8e-05	0.00049106
ENSGALG00000012464_SOUL	58.6749	2.71205	0.647822	4.18641	2.83e-05	0.00049681
ENSGALG00000011803_EMP1	443.747	1.33539	0.319527	4.17926	2.92e-05	0.00051204
ENSGALG00000014976_GATA6	398.52	-1.55274	0.37172	-4.17717	2.95e-05	0.00051611
ENSGALG00000024056_CHST3	188.768	-1.46816	0.351513	-4.17671	2.96e-05	0.00051652
ENSGALG00000000241_STARD4	1167.68	-1.27551	0.305682	-4.17269	3.01e-05	0.00052507
ENSGALG00000041470_PPARA	952.672	-1.52961	0.366786	-4.17031	3.04e-05	0.00052991
ENSGALG00000046843	196.462	-2.04677	0.49085	-4.16986	3.05e-05	0.0005303
ENSGALG00000007102_MLEC	1628.68	-1.19652	0.286991	-4.16918	3.06e-05	0.00053056
ENSGALG00000013143_PDE3A	1603.09	1.41952	0.340458	4.16946	3.05e-05	0.00053056
ENSGALG00000053580	1066.9	-1.18238	0.283654	-4.16839	3.07e-05	0.00053172
ENSGALG00000021972_PLIN4	1703.02	-1.4803	0.355286	-4.16649	3.09e-05	0.00053551
ENSGALG00000019003_PRAG1	129.715	-1.96552	0.472095	-4.1634	3.14e-05	0.00054214
ENSGALG00000019622_TRIM71	165.256	-2.14726	0.515785	-4.16309	3.14e-05	0.0005422
ENSGALG00000040418_DGAT2	407.965	-1.31429	0.315807	-4.1617	3.16e-05	0.00054484
ENSGALG00000007078_ENTPD1	233.327	1.45336	0.349267	4.16116	3.17e-05	0.00054545
ENSGALG00000002263_KLHL6	275.704	1.37617	0.331017	4.15741	3.22e-05	0.00055379
ENSGALG00000032231_C4	212.516	-1.90301	0.458165	-4.15354	3.27e-05	0.00056256
ENSGALG00000013886_LDLRAD4	321.476	1.31451	0.316562	4.15244	3.29e-05	0.00056456
ENSGALG00000006138_HELZ2	1196.3	-1.65366	0.398359	-4.15117	3.31e-05	0.000567
ENSGALG00000011238_WLS	304.745	1.36806	0.329668	4.1498	3.33e-05	0.00056971
ENSGALG00000002952_NRG4	263.667	-1.54481	0.372318	-4.14917	3.34e-05	0.00056989
ENSGALG00000028227_SLC25A20	453.64	-1.22796	0.29594	-4.14934	3.33e-05	0.00056989
ENSGALG00000008552_MAL	29.4664	4.20865	1.01473	4.14754	3.36e-05	0.00057325
ENSGALG00000026989_HOXA7	135.091	1.69472	0.408781	4.1458	3.39e-05	0.00057691
ENSGALG00000009031_SESTD1	601.309	1.47387	0.3556	4.14473	3.4e-05	0.0005789
ENSGALG00000016979_SLC25A30	257.698	1.62504	0.392382	4.14146	3.45e-05	0.00058589
ENSGALG00000020003_MAP3K4	1290.77	-1.24829	0.301436	-4.14114	3.46e-05	0.00058589
ENSGALG00000035836_LDHB	931.234	1.46976	0.354899	4.14136	3.45e-05	0.00058589
ENSGALG00000043598	1.46636e+06	-1.3632	0.329299	-4.13969	3.48e-05	0.00058888
ENSGALG00000004245_NUDT1	331.14	-1.43444	0.346628	-4.13826	3.5e-05	0.00059113
ENSGALG00000008725_KIF16B	1751.42	-1.10247	0.266394	-4.13851	3.5e-05	0.00059113
ENSGALG00000000158_DMA	440.653	-1.61506	0.390316	-4.13784	3.51e-05	0.0005912
ENSGALG00000015252_ST3GAL6	98.0768	1.84161	0.445112	4.1374	3.51e-05	0.0005912
ENSGALG00000034168_WNT5A	352.371	1.37775	0.332989	4.13753	3.51e-05	0.0005912
ENSGALG00000026187_NMNAT3	71.5674	-2.08371	0.503998	-4.13436	3.56e-05	0.00059836
ENSGALG00000012342_SASH1	850.663	1.33066	0.321904	4.13372	3.57e-05	0.0005993
ENSGALG00000011894_CYP2D6	2699.48	-1.42008	0.343769	-4.1309	3.61e-05	0.00060597
ENSGALG00000012338_BDH2	824.986	-1.14527	0.27727	-4.13052	3.62e-05	0.00060625
ENSGALG00000003891_ZNF423	410.281	1.35657	0.328535	4.12916	3.64e-05	0.00060912
ENSGALG00000008947_PAK5	62.2168	2.26997	0.549975	4.12741	3.67e-05	0.00061236
ENSGALG00000037733	967.673	1.19971	0.290671	4.12738	3.67e-05	0.00061236
ENSGALG00000016164_ABCG1	112.669	1.71777	0.416423	4.12506	3.71e-05	0.00061783
ENSGALG00000037043_PIK3C2B	213.875	1.48747	0.360644	4.12449	3.72e-05	0.00061862
ENSGALG00000014878_MAN1A1	2573.01	-1.68274	0.408088	-4.12347	3.73e-05	0.00062064
ENSGALG00000000684_KLHDC8A	55.6385	2.27164	0.551083	4.12215	3.75e-05	0.00062321
ENSGALG00000043128_ARHGEF10L	148.964	1.67216	0.405671	4.12196	3.76e-05	0.00062321
ENSGALG00000008555_MXI1	1999.87	-1.43243	0.347556	-4.12142	3.77e-05	0.00062394
ENSGALG00000017158_POGLUT3	421.053	1.32586	0.321945	4.11829	3.82e-05	0.00063173
ENSGALG00000007759_TMEFF2	129.336	1.60715	0.390492	4.1157	3.86e-05	0.00063811
ENSGALG00000032590_NDE1	148.593	1.58014	0.384007	4.11488	3.87e-05	0.00063961
ENSGALG00000004285_HNF4A	635.45	-1.49305	0.362891	-4.11432	3.88e-05	0.00064041
ENSGALG00000006346_CXCL14	273.361	1.46377	0.355834	4.11362	3.89e-05	0.00064159
ENSGALG00000010681_CPT2	580.395	-1.32485	0.322144	-4.11259	3.91e-05	0.00064372
ENSGALG00000015656	1119.08	1.2545	0.305077	4.11207	3.92e-05	0.0006444
ENSGALG00000011594_NR1H4	347.977	1.43471	0.349318	4.10718	4.01e-05	0.00065742
ENSGALG00000047199	2792.66	-1.98251	0.482823	-4.10607	4.02e-05	0.00065978
ENSGALG00000006583_LSP1P1	2815.47	1.2312	0.300284	4.10012	4.13e-05	0.00067539
ENSGALG00000026903_CALB2	43.8592	2.58058	0.629356	4.10034	4.13e-05	0.00067539
ENSGALG00000033171_TGM4	263.221	-1.77084	0.432151	-4.09774	4.17e-05	0.00068116
ENSGALG00000041344_FABP5	870.891	-1.40338	0.342487	-4.09761	4.17e-05	0.00068116
ENSGALG00000016545_REPS2	567.999	1.46714	0.358166	4.09625	4.2e-05	0.00068437
ENSGALG00000012023_DACT1	621.113	1.21545	0.296915	4.09359	4.25e-05	0.00069098
ENSGALG00000023898	270.751	1.40072	0.342184	4.09348	4.25e-05	0.00069098
ENSGALG00000029935	678.564	-1.25676	0.307111	-4.09219	4.27e-05	0.00069323
ENSGALG00000035334_COX3	49370	-1.07246	0.262064	-4.09237	4.27e-05	0.00069323
ENSGALG00000002383_CD72AG	22.2833	5.16874	1.26348	4.09088	4.3e-05	0.00069564
ENSGALG00000003657_UNC119	26.0642	3.50127	0.855879	4.09084	4.3e-05	0.00069564
ENSGALG00000001189_NCF1C	112.037	2.06655	0.50527	4.09	4.31e-05	0.00069738
ENSGALG00000011078_PTPN13	248.617	1.416	0.346874	4.08217	4.46e-05	0.00072045
ENSGALG00000007533_NPEPL1	1063.19	-1.13187	0.277418	-4.08003	4.5e-05	0.00072543
ENSGALG00000007623_CACNA1G	104.961	1.77316	0.434582	4.08015	4.5e-05	0.00072543
ENSGALG00000008813_CROT	1816.27	-1.268	0.3109	-4.07847	4.53e-05	0.00072948
ENSGALG00000040342_ADAMTS1	218.744	1.74191	0.42713	4.07818	4.54e-05	0.00072955
ENSGALG00000042458_ACTN1	4593.45	1.20792	0.296305	4.07661	4.57e-05	0.00073363
ENSGALG00000016884_SLC15A1	5788.28	-1.65898	0.40748	-4.07131	4.68e-05	0.00074968
ENSGALG00000032978	53.3862	-2.23053	0.547916	-4.07093	4.68e-05	0.00075001
ENSGALG00000049402	266.551	1.39433	0.342714	4.06848	4.73e-05	0.00075708
ENSGALG00000052057	290.645	-1.54984	0.380996	-4.06786	4.74e-05	0.00075823
ENSGALG00000004244_TTPAL	408.463	-1.24715	0.306624	-4.06735	4.76e-05	0.00075902
ENSGALG00000014699_MEGF10	117.266	1.99795	0.491313	4.06655	4.77e-05	0.00076075
ENSGALG00000034326_TMEM158	58.9781	2.46025	0.605555	4.0628	4.85e-05	0.00077219
ENSGALG00000023541_SPHK1	218.041	-1.84942	0.455291	-4.06206	4.86e-05	0.00077376
ENSGALG00000038745_LACTB2	534.168	-1.26306	0.311018	-4.06103	4.89e-05	0.0007763
ENSGALG00000016261_CYBB	213.23	1.46516	0.360946	4.05923	4.92e-05	0.00078089
ENSGALG00000053217	215.07	-1.51872	0.374151	-4.05912	4.93e-05	0.00078089
ENSGALG00000039322_DDR2	135.572	1.90717	0.469952	4.05821	4.94e-05	0.00078304
ENSGALG00000014860_YES1	1513.9	-1.13703	0.280329	-4.05607	4.99e-05	0.00078937
ENSGALG00000007979_CALML4	676.26	-1.2528	0.309076	-4.05336	5.05e-05	0.00079762
ENSGALG00000032234_MARCH5	571.107	-1.22573	0.302417	-4.05311	5.05e-05	0.00079762
ENSGALG00000012072	2882.24	-1.14671	0.282954	-4.05264	5.06e-05	0.0007983
ENSGALG00000006494_GRAMD1B	262.51	1.59576	0.393806	4.05213	5.08e-05	0.00079913
ENSGALG00000012075_DTX3L	637.334	-1.14594	0.282924	-4.05036	5.11e-05	0.00080431
ENSGALG00000051117_GIMD1	38.6042	-2.97305	0.734761	-4.04629	5.2e-05	0.00081749
ENSGALG00000016124_HADH	3917.57	-1.08172	0.267549	-4.04307	5.28e-05	0.00082785
ENSGALG00000002944_CPS1	41.388	-3.03943	0.752198	-4.04073	5.33e-05	0.00083522
ENSGALG00000002775_FA2H	680.523	-1.50784	0.373421	-4.03792	5.39e-05	0.00084434
ENSGALG00000009234_AMDHD2	208.03	-1.4172	0.351125	-4.03618	5.43e-05	0.00084968
ENSGALG00000011630_GLI2	283.711	1.3288	0.329299	4.03524	5.45e-05	0.00085207
ENSGALG00000016767_AFF3	90.062	1.84129	0.456331	4.03499	5.46e-05	0.00085207
ENSGALG00000012111_TMEM37	1180.82	-1.57458	0.390329	-4.03398	5.48e-05	0.00085479
ENSGALG00000012874_DENND11	488.011	-1.22695	0.304199	-4.03336	5.5e-05	0.00085609
ENSGALG00000007493_NSDHL	419.223	-1.48806	0.36905	-4.03214	5.53e-05	0.00085957
ENSGALG00000032386_DCLK2	100.473	1.72772	0.428555	4.0315	5.54e-05	0.00086097
ENSGALG00000026392_PIPOX	333.445	-1.70614	0.423361	-4.02998	5.58e-05	0.00086477
ENSGALG00000037378_RPRM	12.6214	6.97931	1.73187	4.02994	5.58e-05	0.00086477
ENSGALG00000040297_NBL1	551.666	1.3196	0.327767	4.02604	5.67e-05	0.00087826
ENSGALG00000014122_CYB5R1	1357.86	1.36963	0.34074	4.01956	5.83e-05	0.00090174
ENSGALG00000002922_NOTCH2	2340.78	1.13048	0.281313	4.01857	5.86e-05	0.00090453
ENSGALG00000031843_ARHGAP18	1930.5	-1.06631	0.265365	-4.01828	5.86e-05	0.00090464
ENSGALG00000044406	332.638	-1.45693	0.362602	-4.01798	5.87e-05	0.00090482
ENSGALG00000016400_RSAD2	92.3034	-1.96324	0.489361	-4.01185	6.02e-05	0.00092759
ENSGALG00000011124_ARHGAP24	215.869	1.4383	0.35861	4.01075	6.05e-05	0.0009309
ENSGALG00000002554_TSPAN2	251.42	1.49042	0.371758	4.00911	6.09e-05	0.00093533
ENSGALG00000042148_FKBP5	588.32	1.77324	0.442299	4.00914	6.09e-05	0.00093533
ENSGALG00000033061_CAMK2B	127.291	1.58703	0.395901	4.00865	6.11e-05	0.00093609
ENSGALG00000006511_BCL2A1	50.6684	2.28008	0.569354	4.00469	6.21e-05	0.0009509
ENSGALG00000012426_DDHD1	409.386	-1.75777	0.439046	-4.00362	6.24e-05	0.00095413
ENSGALG00000052300	155.806	-1.48355	0.37116	-3.99707	6.41e-05	0.00097983
ENSGALG00000045131	10.3784	-7.08041	1.77226	-3.99513	6.47e-05	0.00098681
ENSGALG00000016510_KRTCAP3	171.469	-1.69968	0.425607	-3.99355	6.51e-05	0.00099124
ENSGALG00000042739_TACC1	522.453	1.16801	0.292471	3.99359	6.51e-05	0.00099124
ENSGALG00000033857_NAT8B	229.975	-1.46816	0.36783	-3.9914	6.57e-05	0.00099918
ENSGALG00000016285	1397.89	-1.50714	0.377721	-3.9901	6.6e-05	0.00100359
ENSGALG00000030607_CHST11	102.9	1.8655	0.467577	3.98973	6.61e-05	0.00100406
ENSGALG00000044799_VSIG4	214.2	1.39389	0.349717	3.98577	6.73e-05	0.00101985
ENSGALG00000016289_DST	14353	-1.06587	0.267503	-3.98452	6.76e-05	0.00102413
ENSGALG00000007595_LRCH3	407.334	1.21388	0.304897	3.98128	6.85e-05	0.00103634
ENSGALG00000045511_PARP9	574.587	-1.14814	0.288404	-3.98103	6.86e-05	0.00103634
ENSGALG00000050564	105.391	1.82003	0.457188	3.98093	6.86e-05	0.00103634
ENSGALG00000004627	246.906	-1.40634	0.353354	-3.97999	6.89e-05	0.00103929
ENSGALG00000017072	370.421	-1.34218	0.337324	-3.9789	6.92e-05	0.00104293
ENSGALG00000032955_TUFT1	198.637	1.40506	0.353326	3.97667	6.99e-05	0.00105164
ENSGALG00000023581_UTS2R	45.4999	2.53835	0.63844	3.97586	7.01e-05	0.00105337
ENSGALG00000032456_COII	20466.1	-1.04272	0.262269	-3.97576	7.02e-05	0.00105337
ENSGALG00000010925_FAM126A	790.778	-1.25199	0.31497	-3.97495	7.04e-05	0.00105585
ENSGALG00000001777_MFSD11	1076.91	-1.11814	0.281466	-3.97255	7.11e-05	0.00106538
ENSGALG00000015681_NRIP1	1782.73	-1.0635	0.267831	-3.97079	7.16e-05	0.00107214
ENSGALG00000006173_XYLB	219.042	-1.39419	0.351412	-3.96739	7.27e-05	0.00108636
ENSGALG00000007878_SDHD	490.999	-1.20575	0.304245	-3.96307	7.4e-05	0.00110504
ENSGALG00000012119_MARCO	1298.53	1.06853	0.269705	3.96183	7.44e-05	0.00110959
ENSGALG00000020876_AOX2	69.6485	2.45177	0.619201	3.95958	7.51e-05	0.00111891
ENSGALG00000005714_PKD1	1253.27	1.15613	0.292257	3.95587	7.63e-05	0.0011352
ENSGALG00000014908_FST	57.3794	2.12054	0.536262	3.9543	7.68e-05	0.00114147
ENSGALG00000011708_MYLK	12946.5	1.43406	0.362788	3.95289	7.72e-05	0.00114578
ENSGALG00000011831_ANKRD50	1255.65	1.126	0.284845	3.95303	7.72e-05	0.00114578
ENSGALG00000054430_GLYCTK	175.171	-1.41442	0.358025	-3.95064	7.79e-05	0.00115538
ENSGALG00000006672_LARP4B	1077.65	-1.10617	0.28002	-3.95031	7.8e-05	0.00115571
ENSGALG00000002990_PRELID1	1273.15	-1.08817	0.276132	-3.94076	8.12e-05	0.00120143
ENSGALG00000007048_SYNM	10833.7	1.24965	0.317132	3.94047	8.13e-05	0.00120164
ENSGALG00000048948	85.8186	-1.8398	0.467166	-3.93821	8.21e-05	0.00121169
ENSGALG00000040793_KDELR2	2116.8	-1.03115	0.261879	-3.93751	8.23e-05	0.00121315
ENSGALG00000046980	18.0389	-4.36118	1.10763	-3.93742	8.24e-05	0.00121315
ENSGALG00000038593	26.0701	-3.31261	0.841821	-3.93505	8.32e-05	0.00122386
ENSGALG00000030587	1381.08	1.32797	0.337519	3.9345	8.34e-05	0.0012254
ENSGALG00000001183_MYH10	3471.95	1.31355	0.333923	3.93368	8.37e-05	0.00122824
ENSGALG00000010364_AADAC	734.539	-1.3061	0.332072	-3.93319	8.38e-05	0.00122864
ENSGALG00000041365_SALL4	67.8399	-1.89962	0.482982	-3.9331	8.39e-05	0.00122864
ENSGALG00000009439_GPR85	38.8791	2.80943	0.71448	3.93214	8.42e-05	0.00123229
ENSGALG00000015491_GPR89A	1029.14	-1.31678	0.334978	-3.93095	8.46e-05	0.00123706
ENSGALG00000013628_C6orf62	1286.81	-1.17571	0.29913	-3.93045	8.48e-05	0.00123834
ENSGALG00000012857_DENND2A	392.611	1.33596	0.340041	3.92881	8.54e-05	0.00124424
ENSGALG00000023934	14563.6	-1.19055	0.303019	-3.92895	8.53e-05	0.00124424
ENSGALG00000011799	56.7505	2.37603	0.604836	3.92839	8.55e-05	0.0012451
ENSGALG00000012929_DNM1L	1271.82	-1.07123	0.27272	-3.92797	8.57e-05	0.00124596
ENSGALG00000000802_DHODH	165.838	-1.43511	0.365517	-3.92624	8.63e-05	0.00125363
ENSGALG00000007994_PARD6B	398.825	-1.35284	0.344662	-3.92513	8.67e-05	0.00125748
ENSGALG00000040348_EHBP1	3181.19	1.02377	0.260832	3.925	8.67e-05	0.00125748
ENSGALG00000006013_ZNF512B	432.197	1.24776	0.318165	3.92174	8.79e-05	0.00127331
ENSGALG00000014042_SSPN	477.809	1.40025	0.357075	3.92144	8.8e-05	0.00127357
ENSGALG00000008728_PTER	265.204	-1.54946	0.395164	-3.92105	8.82e-05	0.00127428
ENSGALG00000051104	204.225	1.38879	0.354267	3.92019	8.85e-05	0.00127756
ENSGALG00000013624_FAM65B	203.996	1.5639	0.399027	3.9193	8.88e-05	0.00128095
ENSGALG00000010371_FAM13A	1235.67	-1.06692	0.272249	-3.91893	8.89e-05	0.00128159
ENSGALG00000051412_PEA15	73.816	2.05866	0.525429	3.91806	8.93e-05	0.00128488
ENSGALG00000009042_ISM1	42.55	2.59876	0.664448	3.91115	9.19e-05	0.00132081
ENSGALG00000006842_ACOT8	567.312	-1.13414	0.29028	-3.90706	9.34e-05	0.00134201
ENSGALG00000006546_CD81	3654.59	1.06433	0.272481	3.90608	9.38e-05	0.00134607
ENSGALG00000011003_SLC35F3	27.1065	3.41013	0.873546	3.90378	9.47e-05	0.00135751
ENSGALG00000005416_TTC39B	650.512	-1.3078	0.335655	-3.89627	9.77e-05	0.00139887
ENSGALG00000004980_KCNMA1	820.676	1.20187	0.308604	3.89455	9.84e-05	0.00140738
ENSGALG00000016483	598.503	-1.26853	0.325863	-3.89283	9.91e-05	0.00141595
ENSGALG00000007559_PDSS1	300.652	-1.32109	0.339435	-3.89201	9.94e-05	0.00141883
ENSGALG00000029764	18.9647	4.93808	1.26883	3.89184	9.95e-05	0.00141883
ENSGALG00000021235_NPY6R	16.2033	-5.19996	1.33671	-3.8901	0.0001002	0.00142754
ENSGALG00000032452_GAS7	192.763	1.40532	0.361496	3.88751	0.00010128	0.0014414
ENSGALG00000033497_FOXP4	108.369	1.65597	0.426471	3.88296	0.00010319	0.00146626
ENSGALG00000035206	657.248	-1.18208	0.304435	-3.88286	0.00010324	0.00146626
ENSGALG00000015112_ZNF521	310.651	1.34496	0.346418	3.88249	0.00010339	0.00146701
ENSGALG00000002523_CREB3	765.784	-1.26336	0.325615	-3.87991	0.00010449	0.00148111
ENSGALG00000011633_SLC5A8	519.021	-1.15108	0.296901	-3.877	0.00010575	0.00149744
ENSGALG00000001565_C5	93.8696	-1.73713	0.448252	-3.87534	0.00010647	0.00150558
ENSGALG00000024031_CYB561	122.447	-1.6501	0.425812	-3.87518	0.00010654	0.00150558
ENSGALG00000015665_SH3BP2	641.561	-1.17835	0.304186	-3.87379	0.00010716	0.00151268
ENSGALG00000006633_TMEM243	67.0259	-2.18202	0.563572	-3.87176	0.00010805	0.0015238
ENSGALG00000039990_TNC	2184.35	1.04543	0.270482	3.86505	0.00011107	0.00156472
ENSGALG00000031496_SPINK5	80.5682	2.42588	0.628142	3.862	0.00011246	0.0015828
ENSGALG00000034427_SCN4A	26.8192	3.2343	0.837703	3.86091	0.00011297	0.00158826
ENSGALG00000015170_VPS13A	3013.23	-1.00894	0.26147	-3.85873	0.00011398	0.00160019
ENSGALG00000036043_TBX3	723.622	-1.85752	0.481399	-3.85859	0.00011404	0.00160019
ENSGALG00000010259_COL28A1	236.617	1.85999	0.482534	3.85462	0.00011591	0.00162306
ENSGALG00000043735	102.298	-1.59556	0.41392	-3.85476	0.00011584	0.00162306
ENSGALG00000008741_PROKR1	27.9043	3.23078	0.838382	3.85359	0.0001164	0.00162826
ENSGALG00000041192_IFIH1	957.427	-1.10192	0.285978	-3.85317	0.0001166	0.00162945
ENSGALG00000008847_VPS54	375.589	-1.1787	0.306056	-3.85126	0.00011751	0.00164055
ENSGALG00000012894_CHRM2	91.6714	2.17988	0.566135	3.85046	0.0001179	0.00164429
ENSGALG00000027514	31.5702	3.12077	0.810715	3.84941	0.0001184	0.00164971
ENSGALG00000009410_PEX1	423.513	-1.14818	0.298367	-3.84823	0.00011897	0.00165599
ENSGALG00000005460_SLCO4A1	376.554	-1.30676	0.339635	-3.84755	0.0001193	0.00165893
ENSGALG00000033956_SFXN1	392.839	-1.22263	0.317835	-3.84674	0.0001197	0.00166275
ENSGALG00000009092_STON1	631.171	1.19269	0.310186	3.84508	0.00012051	0.00167243
ENSGALG00000014126	124.336	-1.61674	0.420554	-3.84431	0.00012089	0.00167562
ENSGALG00000016224_MAOA	3103.37	-1.03446	0.269102	-3.84412	0.00012099	0.00167562
ENSGALG00000005554_ADIPOQ	1251.78	1.35074	0.351467	3.84316	0.00012146	0.00168049
ENSGALG00000010129_PLK3	47.849	2.171	0.565014	3.84238	0.00012185	0.00168419
ENSGALG00000039326_HSBP1L1	39.4315	2.3917	0.622548	3.84179	0.00012214	0.00168655
ENSGALG00000015044_GTF3C6	96.306	1.71146	0.445548	3.84124	0.00012242	0.0016887
ENSGALG00000010736_DIO1	71.4341	-2.13725	0.556495	-3.84055	0.00012276	0.00169175
ENSGALG00000004046_LARP6	144.671	1.46886	0.382595	3.8392	0.00012344	0.00169941
ENSGALG00000042079_NID1	1553.1	1.19677	0.311782	3.83848	0.0001238	0.00170271
ENSGALG00000012913_PKP2	998.696	-1.63008	0.424825	-3.83706	0.00012452	0.0017092
ENSGALG00000043675_ANTXR2	725.184	1.14249	0.297741	3.83721	0.00012444	0.0017092
ENSGALG00000009650	1599.11	1.03416	0.26954	3.83676	0.00012467	0.00170962
ENSGALG00000009466_SEC23IP	446.269	-1.13629	0.296187	-3.8364	0.00012485	0.00171044
ENSGALG00000016463_FAM49A	1177.74	1.08578	0.283129	3.83492	0.0001256	0.00171905
ENSGALG00000011220_SLC25A29	94.7896	1.81136	0.472368	3.83464	0.00012575	0.00171933
ENSGALG00000015895_HTR1B	69.5697	2.17623	0.567648	3.83377	0.0001262	0.00172378
ENSGALG00000006165	192.911	1.49304	0.389731	3.83096	0.00012764	0.00174015
ENSGALG00000019795	197.616	-1.44306	0.376664	-3.83116	0.00012754	0.00174015
ENSGALG00000028145_BORCS6	425.008	-1.86367	0.486531	-3.83054	0.00012786	0.00174143
ENSGALG00000002152_GABRP	11.7506	6.73643	1.76001	3.8275	0.00012945	0.00176133
ENSGALG00000005256_EPHA4	157.613	1.41645	0.370178	3.82641	0.00013002	0.00176565
ENSGALG00000007217_BEST1	72.6464	1.85138	0.48382	3.82659	0.00012993	0.00176565
ENSGALG00000026790_DMRT2	17.9792	4.8575	1.27208	3.81855	0.00013424	0.00182112
ENSGALG00000005897_HMCES	322.241	1.34964	0.353524	3.81768	0.00013471	0.0018258
ENSGALG00000015605_BACH2	174.233	1.5711	0.411619	3.81689	0.00013515	0.00182985
ENSGALG00000000723_STX12	1676.23	-1.16486	0.305354	-3.8148	0.0001363	0.00184184
ENSGALG00000026359_SERTAD4	54.0632	2.05213	0.537937	3.81482	0.00013628	0.00184184
ENSGALG00000050609	15.8553	-5.17224	1.35621	-3.81373	0.00013688	0.00184799
ENSGALG00000008257_MERTK	186.443	1.34407	0.352477	3.81321	0.00013717	0.0018501
ENSGALG00000040666_ATP6V0A4	22.4355	6.19754	1.62544	3.81283	0.00013739	0.00185119
ENSGALG00000041750_ADAMTS9	526.292	1.14655	0.300751	3.81228	0.00013769	0.00185348
ENSGALG00000050154	36.8699	-2.49072	0.653576	-3.81092	0.00013845	0.00186195
ENSGALG00000044841	164.454	-1.40479	0.368679	-3.81034	0.00013878	0.00186451
ENSGALG00000029500_ND5	28078.4	-1.05914	0.27805	-3.80916	0.00013944	0.00186798
ENSGALG00000030466_CS	1053.24	-1.2406	0.325658	-3.80953	0.00013923	0.00186798
ENSGALG00000037618_ASAP1	371.617	1.20054	0.315157	3.80935	0.00013933	0.00186798
ENSGALG00000008544_SLC8A1	290.436	1.25286	0.329013	3.80794	0.00014013	0.00187547
ENSGALG00000014869_NNT	1280.52	-1.05262	0.276728	-3.80381	0.00014249	0.0019052
ENSGALG00000053929	22.9713	4.20721	1.10623	3.80318	0.00014285	0.00190816
ENSGALG00000032868_AHCYL2	1453.78	-1.25458	0.329915	-3.80275	0.0001431	0.00190968
ENSGALG00000009314_CACUL1	285.034	-1.23164	0.323985	-3.80153	0.0001438	0.00191723
ENSGALG00000020249_RAPGEF2	541.293	1.09757	0.288869	3.79954	0.00014496	0.00193084
ENSGALG00000001304	96.8835	1.76593	0.465174	3.79627	0.00014689	0.00195422
ENSGALG00000054034_TNKS1BP1	769.972	1.19119	0.313794	3.79609	0.000147	0.00195422
ENSGALG00000037943_PRKCB	243.498	1.29863	0.342189	3.79507	0.0001476	0.00196036
ENSGALG00000008945_NEXN	664.712	1.65648	0.436684	3.79331	0.00014865	0.00197247
ENSGALG00000006425_SLC6A6	1416.89	-1.19859	0.316037	-3.79258	0.00014909	0.00197639
ENSGALG00000043582	57.2063	2.87748	0.759162	3.79034	0.00015044	0.00199236
ENSGALG00000004205_SOAT1	342.545	-1.28243	0.338367	-3.79007	0.00015061	0.00199266
ENSGALG00000048124	22.4341	3.51156	0.926991	3.78813	0.00015179	0.00200637
ENSGALG00000000225_MGAT4C	185.229	-1.37956	0.364433	-3.78549	0.00015341	0.00202585
ENSGALG00000001779_KIAA0895L	78.0706	-2.01845	0.533831	-3.78107	0.00015615	0.00206019
ENSGALG00000012265_MICALL1	468.194	1.14904	0.304184	3.77746	0.00015844	0.00208832
ENSGALG00000012704_MYLIP	745.519	1.08666	0.287712	3.7769	0.00015879	0.00209107
ENSGALG00000028627_TIMP3	875.367	1.06975	0.283397	3.77473	0.00016018	0.00210678
ENSGALG00000039001_FILIP1	1513.21	1.27601	0.338055	3.77456	0.00016029	0.00210678
ENSGALG00000034081_AKT3	274.391	1.38273	0.366485	3.77296	0.00016132	0.00211837
ENSGALG00000034067_FMOD	57.6889	2.4967	0.662084	3.77098	0.00016261	0.00213323
ENSGALG00000035049	135.137	1.46666	0.389118	3.76918	0.00016378	0.00214661
ENSGALG00000015101_BNC2	153.752	1.48658	0.394504	3.76821	0.00016442	0.00215094
ENSGALG00000042767_LPAR2	506.71	-1.44058	0.382299	-3.76821	0.00016442	0.00215094
ENSGALG00000042836_KCNH2	146.457	1.53344	0.407	3.76765	0.00016479	0.00215371
ENSGALG00000010921_PKD2	371.309	1.3581	0.36065	3.7657	0.00016608	0.00216856
ENSGALG00000002678	351.333	1.33725	0.355166	3.76514	0.00016645	0.00217139
ENSGALG00000026449	29.6985	2.74831	0.730042	3.76459	0.00016682	0.00217419
ENSGALG00000000724_PM20D1	901.554	-1.07318	0.28521	-3.76276	0.00016805	0.00218762
ENSGALG00000001975_TMEM120A	226.959	-1.32351	0.351756	-3.76258	0.00016817	0.00218762
ENSGALG00000050182	284.225	-1.21431	0.323009	-3.75935	0.00017035	0.00221396
ENSGALG00000036229_ND4	22204.4	-1.02185	0.271923	-3.75786	0.00017137	0.00222515
ENSGALG00000011464_EIF5	2788.82	-0.971807	0.258773	-3.75544	0.00017304	0.00224463
ENSGALG00000038783	1796.92	-1.30456	0.347444	-3.75474	0.00017352	0.00224881
ENSGALG00000001872_SDF4	2036.22	-1.00844	0.26874	-3.75248	0.0001751	0.00226714
ENSGALG00000039411_COL25A1	55.6444	2.00262	0.53396	3.7505	0.00017648	0.00228293
ENSGALG00000045747_REEP6	261.188	-4.76841	1.27215	-3.74831	0.00017803	0.00230088
ENSGALG00000039735_EML1	219.892	1.49883	0.400056	3.74656	0.00017928	0.00231482
ENSGALG00000048320_HINT2	964.474	-1.07004	0.285674	-3.74566	0.00017992	0.00232099
ENSGALG00000008661_CYR61	125.816	1.67079	0.4461	3.74532	0.00018016	0.0023219
ENSGALG00000013697_CNDP1	21.2678	-3.70566	0.99006	-3.74286	0.00018193	0.0023426
ENSGALG00000004523_MFN2	838.276	-1.03851	0.277491	-3.74249	0.00018221	0.00234392
ENSGALG00000047578_SELENOP1	562.114	-1.6105	0.430388	-3.74198	0.00018258	0.00234656
ENSGALG00000041423	629.977	1.09882	0.29397	3.73787	0.00018558	0.00238298
ENSGALG00000016602_ARHGAP6	202.713	1.34088	0.358757	3.73756	0.00018581	0.00238373
ENSGALG00000028821_GLIPR2	144.703	1.52793	0.408881	3.73685	0.00018634	0.0023883
ENSGALG00000005398_HAGH	545.199	-1.08311	0.290006	-3.73478	0.00018788	0.00240577
ENSGALG00000011805	1810.02	-1.21557	0.325626	-3.73302	0.0001892	0.00242041
ENSGALG00000041834_AEBP1	729.38	1.31314	0.35185	3.7321	0.00018989	0.00242709
ENSGALG00000010326_FLVCR2	240.615	-1.66688	0.446692	-3.73162	0.00019025	0.00242946
ENSGALG00000010120_KIF2C	179.11	-1.44755	0.388029	-3.73053	0.00019108	0.00243779
ENSGALG00000016543_NHS	255.514	1.38046	0.370102	3.72995	0.00019152	0.00244113
ENSGALG00000002618_KCTD7	80.4273	1.95143	0.523702	3.72622	0.00019437	0.00247525
ENSGALG00000006473_PLXNA4	206.264	1.28769	0.345917	3.72255	0.00019722	0.00250927
ENSGALG00000015193_CCDC80	1219.75	1.30705	0.351144	3.72228	0.00019743	0.00250968
ENSGALG00000030602_ADAM33	235.62	1.23704	0.332384	3.72172	0.00019787	0.00251288
ENSGALG00000009640_CHRM5	18.3822	-3.98936	1.07273	-3.71889	0.0002001	0.00253891
ENSGALG00000008293_SH3PXD2A	979.425	1.11774	0.30076	3.71639	0.00020209	0.00256181
ENSGALG00000025822_CYP1B1	77.0533	-2.16587	0.583124	-3.71426	0.0002038	0.00258119
ENSGALG00000013117_PIK3C2G	238.911	-1.39371	0.375473	-3.71188	0.00020573	0.00260082
ENSGALG00000030499_MOB2	736.032	1.16619	0.314166	3.71201	0.00020562	0.00260082
ENSGALG00000005005_MIEF2	139.185	-1.58235	0.426643	-3.70884	0.00020821	0.00262747
ENSGALG00000026591_GNG12	114.551	1.66722	0.449514	3.70894	0.00020813	0.00262747
ENSGALG00000011241_RFTN1	639.88	1.11217	0.300222	3.70449	0.00021181	0.0026681
ENSGALG00000039741_TNFRSF8	21.9554	4.0984	1.1063	3.70458	0.00021174	0.0026681
ENSGALG00000052280_HEATR5A	848.71	-1.06188	0.286685	-3.704	0.00021223	0.00267089
ENSGALG00000014687_EPHA1	673.328	-1.85461	0.500952	-3.70217	0.00021376	0.00268779
ENSGALG00000043681_DAPP1	88.4769	1.82071	0.491897	3.7014	0.00021441	0.00269351
ENSGALG00000016955_VWA8	1138.05	-1.15164	0.311376	-3.69856	0.00021683	0.00272137
ENSGALG00000002598_TPST1	415.259	1.19326	0.322716	3.69757	0.00021768	0.00272853
ENSGALG00000032372_CYB5R2	1518.61	-1.18969	0.321761	-3.69744	0.00021779	0.00272853
ENSGALG00000011211_HACL1	577.077	-1.18236	0.31981	-3.69706	0.00021811	0.0027301
ENSGALG00000046568	94.6069	-1.57068	0.424901	-3.69659	0.00021852	0.00273276
ENSGALG00000002563_TPM4	390.908	1.70875	0.462313	3.69608	0.00021895	0.00273575
ENSGALG00000014711_PLPP1	594.088	-1.12758	0.305249	-3.69397	0.00022078	0.0027561
ENSGALG00000008616_DDR1	187.856	1.31864	0.357153	3.69209	0.00022242	0.00277407
ENSGALG00000033941_RORC	122.699	-1.52489	0.413058	-3.69171	0.00022275	0.00277572
ENSGALG00000000336_PPP1R12B	920.821	1.03558	0.280577	3.69089	0.00022347	0.00278218
ENSGALG00000017173_GUCY1A2	136.702	1.69981	0.460636	3.69013	0.00022414	0.00278797
ENSGALG00000038355_GDF5	17.7032	4.81849	1.30705	3.68655	0.00022732	0.00282503
ENSGALG00000026838_MDFIC	350.792	1.26755	0.34392	3.68559	0.00022817	0.00283308
ENSGALG00000050734_METTL27	54.7476	-2.17487	0.59038	-3.68385	0.00022974	0.00285006
ENSGALG00000037097_GRK3	901.693	1.06486	0.289102	3.68335	0.00023019	0.00285308
ENSGALG00000008780_CTBS	518.528	-1.24199	0.33726	-3.6826	0.00023087	0.00285898
ENSGALG00000017053_SPART	541.677	-1.09939	0.298787	-3.67951	0.00023369	0.00289126
ENSGALG00000007905_LAMB1	2472.6	1.08689	0.295487	3.6783	0.00023479	0.00290237
ENSGALG00000007044_METTL9	435.663	-1.11107	0.302329	-3.67505	0.0002378	0.00293699
ENSGALG00000013135_GALNT1	2701.95	-1.04224	0.283656	-3.6743	0.00023851	0.00294305
ENSGALG00000005287_ZBTB47	61.0305	1.95393	0.531959	3.67309	0.00023964	0.00295438
ENSGALG00000031642_ILK	899.061	1.17175	0.319055	3.67258	0.00024012	0.00295769
ENSGALG00000015253_COL8A1	71.1533	2.32733	0.633895	3.67148	0.00024115	0.00296521
ENSGALG00000052009	82.1416	-1.63288	0.444738	-3.67156	0.00024108	0.00296521
ENSGALG00000047141	243.108	-1.36968	0.373185	-3.67024	0.00024233	0.00297699
ENSGALG00000007092_LYSMD4	158.726	-1.53621	0.418847	-3.66771	0.00024473	0.00300128
ENSGALG00000017091_FLT1	238.212	1.31486	0.358481	3.66787	0.00024458	0.00300128
ENSGALG00000038885_FEZ1	232.748	1.38081	0.376573	3.66679	0.00024561	0.00300942
ENSGALG00000004519_TRPV2	602.51	1.1473	0.313071	3.66465	0.00024768	0.00302941
ENSGALG00000011555_QKI	539.482	1.16993	0.319238	3.66477	0.00024756	0.00302941
ENSGALG00000015721_SVEP1	1328.79	1.27041	0.346824	3.66299	0.00024929	0.00304639
ENSGALG00000002897_SLC16A14	18.3095	4.86201	1.32765	3.66212	0.00025014	0.0030514
ENSGALG00000010243_PRDX1	2772.06	-1.03337	0.282162	-3.66232	0.00024994	0.0030514
ENSGALG00000052743_ARL4C	114.296	1.50635	0.411527	3.66039	0.00025183	0.00306934
ENSGALG00000006354_GAL3ST2	45.9011	-2.37435	0.648703	-3.66014	0.00025207	0.00306966
ENSGALG00000016185_SLC37A1	518.89	-1.10145	0.301014	-3.65912	0.00025308	0.00307924
ENSGALG00000025935_XPNPEP2	1645.31	-1.61768	0.442355	-3.65696	0.00025522	0.00310258
ENSGALG00000004248_TACR2	53.003	2.11803	0.579255	3.65647	0.00025571	0.00310577
ENSGALG00000013722_SEMA3B	97.3076	-1.65706	0.453226	-3.65615	0.00025603	0.00310697
ENSGALG00000011446_TNFAIP2	477.343	1.29301	0.353793	3.65471	0.00025748	0.00312179
ENSGALG00000000913_CHST6	270.821	-1.23826	0.338923	-3.65352	0.00025867	0.00313357
ENSGALG00000015077_ARHGAP31	463.641	1.14884	0.314939	3.64783	0.00026447	0.00320095
ENSGALG00000054746	47.2682	2.22784	0.61166	3.64229	0.00027022	0.00326778
ENSGALG00000010997_DFNA5	316.236	1.53547	0.421712	3.64103	0.00027155	0.00328097
ENSGALG00000034821_LMAN1L	1258.57	-1.0068	0.276595	-3.63998	0.00027266	0.00329157
ENSGALG00000028949_CORO6	141.806	1.54304	0.424574	3.63434	0.0002787	0.00336153
ENSGALG00000037603	444.503	-1.347	0.370803	-3.63266	0.00028052	0.00338052
ENSGALG00000003670_MAFB	1852.54	-1.39691	0.384669	-3.63145	0.00028184	0.00339352
ENSGALG00000013495_GSDMA	46.8995	2.08282	0.573709	3.63044	0.00028293	0.00340378
ENSGALG00000008127_SPI1	385.215	1.15398	0.317976	3.62914	0.00028437	0.00341806
ENSGALG00000036598_SHISAL1	59.6691	1.95424	0.538619	3.62824	0.00028536	0.00342705
ENSGALG00000028886	8.03958	-6.71684	1.85156	-3.62767	0.00028599	0.00343166
ENSGALG00000008419_SEC13	1744.96	-1.06114	0.292661	-3.62585	0.00028801	0.00345288
ENSGALG00000017075_FRY	614.505	1.24591	0.343795	3.624	0.00029008	0.00347472
ENSGALG00000010643_ZYG11B	655.522	-1.11812	0.308571	-3.62353	0.0002906	0.00347502
ENSGALG00000041826_S100A6	944.286	1.11174	0.30681	3.62354	0.00029059	0.00347502
ENSGALG00000047034	100.184	-1.50652	0.415847	-3.62277	0.00029146	0.0034823
ENSGALG00000037164_ZFHX4	311.732	1.29389	0.357484	3.61943	0.00029525	0.00352449
ENSGALG00000010612_PRKD3	503.102	1.10733	0.305981	3.61894	0.00029581	0.00352514
ENSGALG00000010763_TRIP11	2441.49	-0.9906	0.273718	-3.61905	0.00029569	0.00352514
ENSGALG00000007357_BCL6	306.51	1.15828	0.32032	3.61602	0.00029917	0.00356209
ENSGALG00000000451_MEIG1	8.2285	-6.73561	1.86411	-3.61332	0.00030231	0.00359486
ENSGALG00000010078_GLP1R	221.568	1.23384	0.341482	3.61321	0.00030243	0.00359486
ENSGALG00000043734_LIPG	139.29	1.36875	0.378869	3.61272	0.000303	0.00359847
ENSGALG00000015299_TFG	884.625	-1.0749	0.297715	-3.61051	0.00030559	0.00362621
ENSGALG00000006292	254.469	1.33165	0.368889	3.6099	0.00030631	0.00363166
ENSGALG00000048886	37.9221	-2.18364	0.605154	-3.6084	0.00030809	0.00364651
ENSGALG00000053676	312.669	1.18753	0.329097	3.60845	0.00030803	0.00364651
ENSGALG00000001916_SLIT3	442.209	1.3107	0.363344	3.60732	0.00030938	0.00365555
ENSGALG00000027655_TRABD2B	90.4831	1.67612	0.464618	3.60753	0.00030913	0.00365555
ENSGALG00000005352_GATA5	1846.53	-4.45359	1.23479	-3.60676	0.00031005	0.00365725
ENSGALG00000050921	59.5076	-1.95965	0.54332	-3.6068	0.00031	0.00365725
ENSGALG00000032736_MGLL	1115.81	0.988501	0.274128	3.60599	0.00031097	0.00366501
ENSGALG00000001938_SLC25A24	1475.45	-1.05066	0.29154	-3.60383	0.00031356	0.00369244
ENSGALG00000023742_AHR2	58.7593	-1.94682	0.540429	-3.60236	0.00031535	0.00371032
ENSGALG00000017199_MAML2	383.388	1.10195	0.306023	3.60088	0.00031715	0.00372834
ENSGALG00000009346_HN1L	425.642	-1.08934	0.302659	-3.59922	0.00031917	0.003749
ENSGALG00000000162_DMB1	417.94	-1.63435	0.454168	-3.59855	0.00031999	0.00375548
ENSGALG00000013900_MAP7	1363.23	-0.961826	0.267327	-3.59794	0.00032075	0.0037612
ENSGALG00000008306_FGL2	3657.62	1.14048	0.317075	3.59688	0.00032205	0.00377328
ENSGALG00000030548_OSBP	1209.85	-1.10223	0.306786	-3.59281	0.00032713	0.0038295
ENSGALG00000045115	94.0966	1.5619	0.434911	3.59131	0.00032902	0.00384843
ENSGALG00000039329	71.2289	1.75241	0.488077	3.59044	0.00033012	0.0038581
ENSGALG00000043287_CAV1	546.606	1.48553	0.413889	3.58921	0.00033168	0.00387307
ENSGALG00000010798_DHCR24	242.776	-1.79865	0.501183	-3.5888	0.00033221	0.00387593
ENSGALG00000000997_GJC3	139.319	1.36274	0.37978	3.58825	0.0003329	0.00388078
ENSGALG00000054415	57.469	-1.93402	0.539137	-3.58726	0.00033418	0.00389237
ENSGALG00000011950_ACO2	3156.51	-0.970189	0.270473	-3.587	0.0003345	0.00389288
ENSGALG00000009497_AVPR2	17.8638	4.82435	1.34511	3.58657	0.00033505	0.00389607
ENSGALG00000042822_TAX1BP1	2154.62	-0.943746	0.263154	-3.58629	0.00033542	0.00389711
ENSGALG00000036847_PLAC9	103.247	1.69447	0.472532	3.58593	0.00033588	0.00389914
ENSGALG00000050797_SOCS7	198.732	-1.2699	0.354178	-3.58549	0.00033645	0.00390251
ENSGALG00000002831_SH3PXD2B	150.45	1.43945	0.40155	3.58473	0.00033742	0.00390803
ENSGALG00000042325	380.681	1.10942	0.309489	3.58469	0.00033748	0.00390803
ENSGALG00000010628_ACSL1	1188.57	-1.12805	0.314862	-3.58267	0.0003401	0.00393502
ENSGALG00000015706_LETM1	1360.06	-1.03103	0.287888	-3.58137	0.0003418	0.00395141
ENSGALG00000037805_RPS19	12875.3	0.930536	0.259858	3.58094	0.00034235	0.00395455
ENSGALG00000002790_ABLIM3	65.1911	1.82204	0.508857	3.58065	0.00034274	0.00395569
ENSGALG00000001611_B3GAT1	17.3069	4.22245	1.17952	3.57981	0.00034385	0.00395582
ENSGALG00000003336_DAPK2	240.604	-1.29718	0.362379	-3.57962	0.00034409	0.00395582
ENSGALG00000010391_MMRN1	165.199	1.55128	0.433351	3.57972	0.00034396	0.00395582
ENSGALG00000011497_PECR	525.184	-1.05359	0.294302	-3.57995	0.00034365	0.00395582
ENSGALG00000028301	145.268	1.4394	0.402115	3.57956	0.00034417	0.00395582
ENSGALG00000007550	339.735	-1.16083	0.324373	-3.57869	0.00034532	0.00396578
ENSGALG00000008022_TAPBP	1035.97	-1.39401	0.389673	-3.5774	0.00034704	0.00398218
ENSGALG00000047540	136.687	-1.40304	0.392247	-3.57692	0.00034767	0.00398613
ENSGALG00000005860_ACAA1	1227.54	-1.02346	0.28615	-3.57666	0.00034802	0.00398686
ENSGALG00000013001_CTNND2	27.1793	2.78792	0.780557	3.57171	0.00035466	0.00405966
ENSGALG00000044326	480.44	1.31556	0.368377	3.57123	0.00035531	0.00406371
ENSGALG00000051260	2254.23	-1.08043	0.302974	-3.56609	0.00036234	0.00414074
ENSGALG00000005414_MSRB1	83.1727	-1.72456	0.483772	-3.56481	0.00036412	0.00415764
ENSGALG00000004390_AP3B1	1306.89	-1.06173	0.2979	-3.56407	0.00036516	0.00416606
ENSGALG00000044554_RIDA	263.991	-1.15241	0.323562	-3.56165	0.00036854	0.00420119
ENSGALG00000039536_C2H8ORF22	343.874	-4.21771	1.18449	-3.56079	0.00036975	0.00421155
ENSGALG00000010743_LRRC42	273.152	1.24122	0.348633	3.56025	0.0003705	0.0042167
ENSGALG00000016259_DYNLT3	472.768	-1.04413	0.293305	-3.55986	0.00037105	0.00421951
ENSGALG00000002643	79.0579	1.69669	0.476663	3.55951	0.00037155	0.00422035
ENSGALG00000013632_ACOT13	285.171	-1.2479	0.350596	-3.55938	0.00037173	0.00422035
ENSGALG00000020741_HPS6	353.1	-1.10467	0.310569	-3.55692	0.00037523	0.00425657
ENSGALG00000006503_VDAC1	1975.6	-0.966278	0.271907	-3.55371	0.00037984	0.00430538
ENSGALG00000015080_SLC24A2	41.4264	-2.75807	0.776321	-3.55274	0.00038123	0.00431766
ENSGALG00000034281_TMCC2	198.965	1.32378	0.372806	3.55084	0.000384	0.00434417
ENSGALG00000052760_ATOH7	16.9404	-3.67186	1.03412	-3.55071	0.0003842	0.00434417
ENSGALG00000037880_ATP5A1Z	4076.61	-0.932265	0.26258	-3.5504	0.00038465	0.00434575
ENSGALG00000011209_EVL	1417.1	1.00655	0.283554	3.54976	0.00038558	0.00435267
ENSGALG00000042894_SLC25A39	432.838	-1.13309	0.319325	-3.54839	0.00038759	0.00437183
ENSGALG00000037642_SLC23A1	125.414	-2.23176	0.62902	-3.54799	0.00038818	0.00437492
ENSGALG00000030027_MCAM	826.293	1.10412	0.311235	3.54754	0.00038884	0.00437887
ENSGALG00000008294_ITPR1	1370.66	1.01147	0.285453	3.54339	0.00039502	0.0044448
ENSGALG00000036789_ADGRL2	1056.29	0.980486	0.277088	3.53854	0.00040235	0.00452371
ENSGALG00000004812_FAM129A	997.832	1.05576	0.298685	3.5347	0.00040824	0.00458624
ENSGALG00000049887	22.9985	-3.58747	1.01511	-3.53406	0.00040922	0.00459352
ENSGALG00000036114_SMO	280.837	1.24	0.350914	3.53363	0.0004099	0.00459742
ENSGALG00000035465_WDR76	86.2994	-1.847	0.524055	-3.52444	0.00042439	0.00475605
ENSGALG00000016419_ASAP2	738.339	-1.05648	0.299802	-3.52394	0.00042519	0.00476119
ENSGALG00000002709_MYO1C	1441.89	1.03901	0.294886	3.52343	0.00042599	0.00476639
ENSGALG00000012361_NIN	136.11	1.44699	0.410706	3.52319	0.00042639	0.00476703
ENSGALG00000029276_PPP1R9B	591.559	1.05009	0.298148	3.52203	0.00042825	0.00478397
ENSGALG00000017021_ATP7B	584.988	-1.367	0.388519	-3.51849	0.00043401	0.00484056
ENSGALG00000029811_BMPER	111.51	1.60039	0.454836	3.51861	0.00043382	0.00484056
ENSGALG00000000154_DENND2D	193.158	-1.3094	0.372252	-3.51752	0.00043559	0.0048543
ENSGALG00000008122_SLC39A13	481.312	1.07743	0.306558	3.5146	0.00044041	0.00489186
ENSGALG00000014935_GREB1L	148.399	1.44711	0.411676	3.51516	0.00043949	0.00489186
ENSGALG00000016810_SH3RF3	201.492	1.22251	0.347855	3.51442	0.00044072	0.00489186
ENSGALG00000040541_SLC5A6	577.196	-1.06581	0.303256	-3.51456	0.00044049	0.00489186
ENSGALG00000052243_CYP2C18	287.814	-1.82041	0.517975	-3.51448	0.00044061	0.00489186
ENSGALG00000012222_RAP1GDS1	611.769	1.10372	0.314144	3.51341	0.00044239	0.00490647
ENSGALG00000038768_FAM20C	129.991	1.43763	0.409385	3.51169	0.00044526	0.0049344
ENSGALG00000036683_PNPO	89.4536	-1.66143	0.473429	-3.50935	0.0004492	0.00497404
ENSGALG00000005846_MPDZ	637.947	1.13353	0.323184	3.50739	0.00045252	0.00500684
ENSGALG00000006038_TGFBR3	718.401	1.02076	0.291091	3.50668	0.00045374	0.00501633
ENSGALG00000051159	234.888	-1.40825	0.401969	-3.50339	0.00045938	0.00507472
ENSGALG00000005331_GJC2	459.321	1.25074	0.357054	3.50295	0.00046014	0.00507909
ENSGALG00000012559_LARGE1	172.861	1.29637	0.370223	3.50159	0.00046249	0.00510095
ENSGALG00000009689_PON1	50.281	2.02498	0.578465	3.50061	0.00046419	0.00511569
ENSGALG00000045584	669.04	1.01356	0.28958	3.5001	0.00046509	0.00512151
ENSGALG00000042607_RSPO3	248.582	1.2129	0.346601	3.49942	0.00046627	0.00513045
ENSGALG00000028186_RERG	260.956	1.27607	0.364762	3.49835	0.00046815	0.00514703
ENSGALG00000000835_PLEKHJ1	954.447	-0.968265	0.276912	-3.49666	0.00047113	0.00517569
ENSGALG00000015069_B4GALT4	279.569	-1.12287	0.321466	-3.49296	0.0004777	0.00524378
ENSGALG00000005676_TTC28	724.282	0.994095	0.284622	3.49269	0.00047819	0.00524499
ENSGALG00000008677_VIM	2649.71	1.44711	0.414566	3.49066	0.00048183	0.00527245
ENSGALG00000013715_DLC1	531.25	1.09374	0.313319	3.49083	0.00048152	0.00527245
ENSGALG00000049529	414.056	1.30131	0.372774	3.49089	0.00048142	0.00527245
ENSGALG00000015034_ANKRD29	59.037	1.81526	0.520225	3.48937	0.00048417	0.00529387
ENSGALG00000048074	50.0771	2.16981	0.62194	3.48877	0.00048524	0.00530149
ENSGALG00000023936	752.525	-1.10857	0.317853	-3.48769	0.00048722	0.00531887
ENSGALG00000003604_SLC46A1	119.531	-1.38446	0.397295	-3.48473	0.00049264	0.00537235
ENSGALG00000019397_CERK	915.517	-0.955593	0.274234	-3.48459	0.00049289	0.00537235
ENSGALG00000001366_CASP9	224.231	-1.15711	0.332229	-3.48286	0.00049608	0.00540296
ENSGALG00000016379_SMS	385.454	1.28219	0.368232	3.48203	0.00049763	0.00541136
ENSGALG00000033656_DQX1	519.014	-1.24127	0.356468	-3.48212	0.00049745	0.00541136
ENSGALG00000023437_NQO1	1157.25	-0.952852	0.273707	-3.48128	0.00049902	0.00542224
ENSGALG00000029621_SEMA3F	135.064	1.48584	0.426923	3.48035	0.00050077	0.00543694
ENSGALG00000009784_PTPN14	317.439	1.15784	0.332823	3.47883	0.00050361	0.00546351
ENSGALG00000008997_STEAP4	17.7712	-3.99724	1.14943	-3.47759	0.00050595	0.00548179
ENSGALG00000041577_ITGA4	354.788	1.2125	0.348668	3.47752	0.00050608	0.00548179
ENSGALG00000017099_RASL11A	44.8883	2.10822	0.606327	3.47704	0.00050699	0.00548741
ENSGALG00000016304_LRRC1	479.782	-1.04846	0.301577	-3.4766	0.00050782	0.00549215
ENSGALG00000001995_LIMS2	141.081	1.32551	0.381596	3.47359	0.00051355	0.00554546
ENSGALG00000038652	74.6114	1.85006	0.532597	3.47366	0.00051341	0.00554546
ENSGALG00000013272_PRMT8	105.142	-1.41999	0.408822	-3.47337	0.00051396	0.00554562
ENSGALG00000005248_CDC14A	644.303	-1.16409	0.335353	-3.47124	0.00051807	0.00558556
ENSGALG00000002112_CSF3R	191.378	1.42573	0.410807	3.47055	0.00051939	0.00559555
ENSGALG00000007332_PRICKLE2	185.253	1.22641	0.353474	3.46959	0.00052125	0.00560282
ENSGALG00000013168_IAPP	84.0624	-2.26357	0.652391	-3.46965	0.00052115	0.00560282
ENSGALG00000034675_XKR9	93.2551	-6.06892	1.74918	-3.46958	0.00052128	0.00560282
ENSGALG00000003702_CLINT1	2792.04	-0.93907	0.270729	-3.46867	0.00052304	0.00561739
ENSGALG00000004184_SPARC	4567.33	1.21765	0.351185	3.46727	0.00052578	0.0056425
ENSGALG00000016105	664.831	1.01735	0.293456	3.46681	0.00052668	0.00564776
ENSGALG00000041736_FSTL5	29.2305	2.63918	0.761633	3.46516	0.00052991	0.00567808
ENSGALG00000001768_TENM2	46.7748	2.01952	0.582861	3.46483	0.00053056	0.00568065
ENSGALG00000016883_DOCK9	1477.19	-0.925024	0.267043	-3.46396	0.00053229	0.00569485
ENSGALG00000039525	105.406	1.67803	0.484715	3.4619	0.00053639	0.00573422
ENSGALG00000010820_CHGA	8586.55	-1.03324	0.298541	-3.46098	0.00053822	0.00574942
ENSGALG00000005966_SEC61A1	2081.75	-0.911155	0.263559	-3.45713	0.00054597	0.0058188
ENSGALG00000012018_UGT8	1358.78	-1.10546	0.319754	-3.45722	0.00054579	0.0058188
ENSGALG00000043137	334.956	1.43451	0.414932	3.45721	0.00054579	0.0058188
ENSGALG00000030941_KIAA1324	166.543	-1.46175	0.422909	-3.45641	0.00054742	0.00582982
ENSGALG00000040068_HSD17B10	852.183	-1.23453	0.357362	-3.45456	0.00055119	0.00586544
ENSGALG00000004521_GPX3	1347.91	1.2249	0.354816	3.45222	0.00055599	0.00591206
ENSGALG00000030673	136.945	1.45525	0.421634	3.45145	0.00055757	0.00592433
ENSGALG00000026299	112.47	-1.7835	0.516937	-3.45014	0.0005603	0.00594878
ENSGALG00000042008_GSTM3	1589.54	-0.944519	0.273871	-3.44878	0.00056313	0.00597425
ENSGALG00000011917_PPM1A	1432.98	-0.927539	0.268976	-3.4484	0.00056391	0.00597796
ENSGALG00000011239_OXNAD1	143.667	-1.28017	0.371297	-3.44783	0.00056512	0.00598414
ENSGALG00000013968_SGCB	429.392	1.16147	0.336881	3.44771	0.00056535	0.00598414
ENSGALG00000025999_NDUFA4	1136.93	1.07644	0.312321	3.44657	0.00056774	0.0060003
ENSGALG00000037065_SC5D	166.974	-1.41541	0.41065	-3.44677	0.00056734	0.0060003
ENSGALG00000053559	1071.26	-1.01275	0.293934	-3.44552	0.00056997	0.00601924
ENSGALG00000015842_TIAM1	247.415	1.13039	0.328373	3.4424	0.00057657	0.0060844
ENSGALG00000027633_RASSF9	118.172	1.50895	0.438504	3.44114	0.00057927	0.00610826
ENSGALG00000049798_HDGFL3	492.155	1.14343	0.332353	3.44041	0.00058084	0.00612019
ENSGALG00000009068_ITPKB	343.764	1.09884	0.319504	3.4392	0.00058344	0.00613548
ENSGALG00000049326	770.725	-1.56956	0.456377	-3.43917	0.0005835	0.00613548
ENSGALG00000054099	140.664	-1.3163	0.382744	-3.43912	0.00058362	0.00613548
ENSGALG00000017122_SGCG	188.43	1.28895	0.374881	3.43828	0.00058542	0.00614979
ENSGALG00000001161_FLI1	466.503	1.03781	0.301973	3.43678	0.00058868	0.00617474
ENSGALG00000011079_GLRX5	450.318	-1.10841	0.322512	-3.43681	0.0005886	0.00617474
ENSGALG00000017068_KL	107.478	-4.77595	1.38989	-3.4362	0.00058994	0.0061833
ENSGALG00000019063_MMP10	196.178	1.20973	0.352082	3.43593	0.00059053	0.00618483
ENSGALG00000006755_USP2	24.8166	-3.21948	0.937126	-3.43549	0.00059149	0.00618551
ENSGALG00000011296	347.412	-1.05959	0.308416	-3.43557	0.00059131	0.00618551
ENSGALG00000013037_BCL2L13	579.771	1.00285	0.292131	3.43288	0.00059721	0.00623889
ENSGALG00000040388_PUDP	266.785	-1.11026	0.323431	-3.43275	0.00059749	0.00623889
ENSGALG00000008263_CNTN4	68.3792	1.67112	0.487018	3.43132	0.00060065	0.00626724
ENSGALG00000004683_TPD52L2	644.574	0.971916	0.283508	3.42817	0.00060765	0.00632606
ENSGALG00000015511_ROBO1	214.044	1.39498	0.406902	3.42829	0.0006074	0.00632606
ENSGALG00000037410_HEPH	1767.02	-1.22997	0.358774	-3.42824	0.0006075	0.00632606
ENSGALG00000014651_LYSMD3	646.595	-1.01095	0.295087	-3.42593	0.00061269	0.00637373
ENSGALG00000016325_GSTA3	3518.83	-1.52337	0.444869	-3.4243	0.00061638	0.0064073
ENSGALG00000025819_UQCRFS1	550.931	-1.04227	0.304465	-3.4233	0.00061865	0.00642615
ENSGALG00000010402_HPGDS	1795.7	-1.35191	0.395023	-3.42235	0.00062081	0.00644378
ENSGALG00000039349_DISC1	141.274	1.42362	0.416074	3.42154	0.00062267	0.00645664
ENSGALG00000040855_PTPRR	324.155	-1.09263	0.31935	-3.42141	0.00062298	0.00645664
ENSGALG00000012866_SERPINB6	1259.14	-0.996077	0.291166	-3.421	0.00062392	0.00645957
ENSGALG00000026055_PALM	212.4	1.26258	0.369079	3.42088	0.00062419	0.00645957
ENSGALG00000009336_FAM45A	443.191	-1.12075	0.32773	-3.41974	0.00062682	0.0064689
ENSGALG00000009667_MFAP3L	33.6267	2.36796	0.692363	3.42011	0.00062597	0.0064689
ENSGALG00000011404_HOPX	111.731	1.39723	0.408586	3.41968	0.00062695	0.0064689
ENSGALG00000043010_NR2F6	1351.97	-1.09215	0.319368	-3.41971	0.00062688	0.0064689
ENSGALG00000041909	237.559	-1.37318	0.401699	-3.41845	0.0006298	0.00649348
ENSGALG00000037953_TUBA1A	1676.69	1.22045	0.357246	3.41626	0.00063487	0.00654089
ENSGALG00000012662_NUAK1	229.561	1.21064	0.354668	3.41343	0.0006415	0.00660433
ENSGALG00000001118_NEK6	797.132	-0.9542	0.279627	-3.4124	0.00064393	0.0066244
ENSGALG00000001765_CAAP1	252.038	-1.13152	0.33162	-3.41211	0.00064463	0.00662673
ENSGALG00000003517_ZBTB8OS	648.789	-1.02021	0.299063	-3.41136	0.00064639	0.00663991
ENSGALG00000051365	84.7596	-2.13234	0.626278	-3.40478	0.00066218	0.00679713
ENSGALG00000016174_LMBRD1	395.633	-1.07114	0.31465	-3.40423	0.0006635	0.00680566
ENSGALG00000002553_PCDH1	851.763	-1.34866	0.396262	-3.40345	0.00066541	0.00682026
ENSGALG00000004793	140.649	1.34468	0.395234	3.40224	0.00066837	0.00684546
ENSGALG00000037828_SLC47A1	85.25	-1.66613	0.489893	-3.401	0.00067139	0.00687143
ENSGALG00000053446	228.091	4.03007	1.18514	3.40051	0.00067259	0.00687862
ENSGALG00000007016_FAM169B	216.15	-1.28307	0.377393	-3.39983	0.00067427	0.00689069
ENSGALG00000003529_SYNC	213.488	1.31262	0.386143	3.39931	0.00067556	0.00689886
ENSGALG00000028466	95.5857	1.56733	0.461369	3.39714	0.00068094	0.0069487
ENSGALG00000006323_LECT2	27.0439	2.68702	0.791249	3.39592	0.00068399	0.00697471
ENSGALG00000032595_NDUFB2	945.703	-1.11062	0.327076	-3.3956	0.00068478	0.00697762
ENSGALG00000005779_FBXO31	265.312	-1.21049	0.35672	-3.39339	0.00069034	0.00702919
ENSGALG00000004262_TMIGD1	1052.76	7.69278	2.26854	3.39108	0.00069619	0.00708353
ENSGALG00000047289_TNFAIP8L3	138.201	1.40938	0.415654	3.39074	0.00069704	0.00708702
ENSGALG00000016322	91.7578	1.60537	0.473509	3.39037	0.00069798	0.00709142
ENSGALG00000029624_DHRS4	1438.32	-0.939482	0.277273	-3.38829	0.0007033	0.00714022
ENSGALG00000016886_FARP1	575.792	1.0142	0.299399	3.38745	0.00070546	0.00715687
ENSGALG00000038920	15.0644	5.63294	1.66374	3.38571	0.00070994	0.00719712
ENSGALG00000036240_AKAP12	1846.74	1.21314	0.35836	3.38526	0.0007111	0.00720367
ENSGALG00000000461_MRC2	1914.96	1.12487	0.332305	3.38506	0.00071162	0.00720371
ENSGALG00000011203_HPSE	75.3846	1.59311	0.470986	3.38251	0.00071827	0.00726568
ENSGALG00000001529_THYN1	527.868	1.22572	0.362473	3.38155	0.00072079	0.00728198
ENSGALG00000010825_AGR2	741.548	-1.32612	0.392169	-3.38149	0.00072093	0.00728198
ENSGALG00000037869	258.238	1.19908	0.354638	3.38112	0.0007219	0.00728652
ENSGALG00000008165_GPR75	48.5103	2.00931	0.594429	3.38024	0.00072423	0.00730476
ENSGALG00000039682_HCLS1	1377.55	0.903893	0.267465	3.37948	0.00072623	0.00731959
ENSGALG00000026313_RND3	183.266	1.214	0.359503	3.3769	0.00073308	0.00737795
ENSGALG00000040266_GLI3	290.969	1.11627	0.330558	3.37692	0.00073303	0.00737795
ENSGALG00000010703_DGLUCY	306.998	-1.14549	0.339569	-3.37337	0.00074255	0.00746788
ENSGALG00000024041_FAHD1	187.329	-1.21429	0.360053	-3.37254	0.00074478	0.0074849
ENSGALG00000004400	460.665	1.07216	0.317948	3.37213	0.0007459	0.00749076
ENSGALG00000003597_AK2	1672.35	-0.960039	0.284751	-3.3715	0.00074761	0.00750247
ENSGALG00000040573_FMO3	135.603	1.78909	0.530684	3.37129	0.00074816	0.00750262
ENSGALG00000011689_PDIA5	749.963	-0.961751	0.285456	-3.36917	0.00075395	0.00755524
ENSGALG00000003733_LIFR	395.514	1.08994	0.323677	3.36736	0.00075893	0.00759966
ENSGALG00000050863	56.0598	-1.7681	0.52523	-3.36633	0.00076175	0.00762241
ENSGALG00000015346_NFKBIZ	330.763	-1.29481	0.384679	-3.36595	0.00076279	0.0076274
ENSGALG00000014899_NUS1	494.383	-1.02552	0.304732	-3.36533	0.00076452	0.00763919
ENSGALG00000053860	1001.98	-1.15497	0.343243	-3.36488	0.00076577	0.00764615
ENSGALG00000034971_SLC45A4	357.798	1.14507	0.340321	3.36466	0.00076637	0.00764668
ENSGALG00000009724_GREM1	422.73	1.36781	0.406708	3.36312	0.00077067	0.00768409
ENSGALG00000006895_CEP131	435.195	1.04937	0.312164	3.3616	0.00077492	0.00772096
ENSGALG00000047391	19.4033	-2.94571	0.876868	-3.35936	0.00078124	0.0077783
ENSGALG00000005976_TCEA2	119.42	1.41706	0.421933	3.35849	0.00078368	0.00779706
ENSGALG00000011361_CRYZ	587.27	-1.12696	0.3356	-3.35805	0.00078493	0.00780393
ENSGALG00000001558_MOV10	337.953	-1.24338	0.370305	-3.35773	0.00078586	0.00780456
ENSGALG00000014662_RBP5	306.292	1.15779	0.344824	3.35764	0.00078612	0.00780456
ENSGALG00000007712_MYO1B	1033.2	0.996177	0.296788	3.35652	0.00078929	0.00783045
ENSGALG00000005869_COPG1	1877.99	-0.978622	0.291629	-3.35571	0.00079162	0.00784794
ENSGALG00000012798_SSR1	1438.43	-1.0098	0.301103	-3.35369	0.00079743	0.00789662
ENSGALG00000027777_CNN2	260.822	1.09531	0.326606	3.35361	0.00079766	0.00789662
ENSGALG00000023294_RPLP0	8081.92	0.886516	0.264424	3.35263	0.00080049	0.00791898
ENSGALG00000016222_NDP	31.1796	2.73884	0.817257	3.35125	0.00080447	0.00795268
ENSGALG00000047058	1091.28	-1.03045	0.307502	-3.35105	0.00080507	0.00795299
ENSGALG00000000311_DOCK5	2001.26	-1.06267	0.317173	-3.35045	0.0008068	0.00796443
ENSGALG00000006132_MOSPD1	254.874	-1.08474	0.323779	-3.35024	0.00080742	0.00796491
ENSGALG00000043744_NDFIP1	1269.13	-0.984692	0.293947	-3.3499	0.00080842	0.00796912
ENSGALG00000032079_CYTB	23758.6	-0.935493	0.279311	-3.34929	0.00081019	0.00798093
ENSGALG00000031563_ECI1	249.095	-1.09097	0.325831	-3.34826	0.00081322	0.00800507
ENSGALG00000002919_MON1A	510.987	-1.06169	0.317252	-3.34652	0.00081832	0.0080496
ENSGALG00000008346_CASP18	560.39	-1.13376	0.338987	-3.34456	0.00082414	0.00809604
ENSGALG00000032628_SRCIN1	102.854	1.52494	0.45595	3.34454	0.0008242	0.00809604
ENSGALG00000009172_OSBPL6	664.838	-0.967948	0.28944	-3.34421	0.00082517	0.00809978
ENSGALG00000005423_GRHPR	173.646	-1.4489	0.433582	-3.3417	0.00083267	0.00816766
ENSGALG00000015428	29.5641	2.36574	0.708083	3.34105	0.00083461	0.00817519
ENSGALG00000049589	31.534	2.59314	0.77612	3.34116	0.00083428	0.00817519
ENSGALG00000008940	18599.5	-0.910042	0.272412	-3.34068	0.00083574	0.00818051
ENSGALG00000004336_INPPL1	79.8014	1.51962	0.454942	3.34024	0.00083705	0.00818185
ENSGALG00000014982_RBBP8	408.515	-1.13354	0.339355	-3.34027	0.00083697	0.00818185
ENSGALG00000012586_GKAP1	314.893	-1.07116	0.320755	-3.33949	0.00083932	0.00819822
ENSGALG00000012934_BICD1	85.9876	1.51127	0.452732	3.33812	0.00084348	0.00823309
ENSGALG00000012462_KIF5C	481.488	1.03011	0.308691	3.33704	0.00084676	0.00825928
ENSGALG00000004901_CORO1C	2977.65	0.877357	0.262948	3.33662	0.00084805	0.00826028
ENSGALG00000035537_SYNJ2BP	621.495	-1.04449	0.313028	-3.33674	0.00084767	0.00826028
ENSGALG00000053511_APOLD1	76.0926	1.88863	0.566461	3.33408	0.00085581	0.00833005
ENSGALG00000003138_OXTR	23.5711	2.76049	0.828244	3.33294	0.00085933	0.00835849
ENSGALG00000005094_GRAPL	106.812	1.55359	0.466269	3.33196	0.00086236	0.00838209
ENSGALG00000041787_PLA2G15	144.095	1.31099	0.393586	3.33088	0.0008657	0.00840875
ENSGALG00000030450_CLIP2	305.327	1.06833	0.320801	3.3302	0.00086785	0.00842372
ENSGALG00000012013_SLC25A17	358.824	-1.18221	0.355264	-3.32769	0.00087569	0.00848971
ENSGALG00000039615_MSN	3377.71	1.0185	0.306074	3.32763	0.00087587	0.00848971
ENSGALG00000028565_PCDHGC3	745.945	1.11146	0.334072	3.32701	0.00087783	0.00850279
ENSGALG00000011687	3111.38	1.19036	0.358067	3.32442	0.00088604	0.00857632
ENSGALG00000051748_METTL11B	23.0922	-2.57053	0.773455	-3.32344	0.00088914	0.00860037
ENSGALG00000054306_SRXN1	482.972	-1.1511	0.346395	-3.32307	0.00089031	0.00860574
ENSGALG00000008373_STRADB	375.483	-1.03541	0.311659	-3.32224	0.00089297	0.00862539
ENSGALG00000023172	20.4592	2.913	0.87714	3.32103	0.00089687	0.00865147
ENSGALG00000027070_TIMP2	1634.11	1.05937	0.318989	3.32101	0.00089691	0.00865147
ENSGALG00000006724	272.428	1.199	0.361116	3.32026	0.00089933	0.00866883
ENSGALG00000030070_QDPR	571.133	-1.03936	0.313123	-3.31932	0.00090237	0.00869214
ENSGALG00000005981_GDF2	24.8235	2.55805	0.771119	3.31732	0.00090886	0.00874855
ENSGALG00000050493	25.3678	-2.5185	0.759316	-3.3168	0.00091056	0.00875884
ENSGALG00000048815	14.7201	5.61313	1.69261	3.31626	0.00091231	0.00876965
ENSGALG00000010500_NKX6-2	18.3676	3.89293	1.17443	3.31475	0.00091727	0.0088112
ENSGALG00000034392	96.2568	1.47939	0.446382	3.31418	0.00091911	0.00882282
ENSGALG00000028354_METRNL	410.68	1.02882	0.310487	3.31358	0.00092111	0.00883593
ENSGALG00000005251_CMTM4	306.366	-1.08145	0.32654	-3.31185	0.0009268	0.00888435
ENSGALG00000015729_LPAR1	236.383	1.23999	0.374439	3.31159	0.00092766	0.00888653
ENSGALG00000013197_GALNT12	904.26	-1.02434	0.309349	-3.31127	0.00092873	0.00889063
ENSGALG00000006439_ARHGEF6	619.533	0.944898	0.285452	3.31019	0.00093233	0.00891899
ENSGALG00000043988	19.8297	-3.57047	1.07914	-3.30863	0.00093752	0.00896249
ENSGALG00000010244_AKR1A1	1451.31	-1.0165	0.307309	-3.30773	0.00094054	0.00898482
ENSGALG00000013878_PCYOX1	1088.17	-0.948351	0.286723	-3.30755	0.00094115	0.00898482
ENSGALG00000043363_KIAA0556	116.623	-1.31773	0.39848	-3.30688	0.0009434	0.00900011
ENSGALG00000012282_L2HGDH	287.699	-1.05414	0.318811	-3.30647	0.00094478	0.0090071
ENSGALG00000005223_ADCYAP1R1	63.9255	1.79465	0.543264	3.30346	0.00095501	0.00909841
ENSGALG00000023881_PLXDC1	29.0724	2.43093	0.736177	3.3021	0.00095964	0.00913623
ENSGALG00000029968_GADD45B	283.469	1.07864	0.32713	3.29728	0.00097624	0.009288
ENSGALG00000040367_P2RY14	32.3239	2.21199	0.671073	3.2962	0.00098003	0.00931768
ENSGALG00000037619_HOXB6	98.9441	1.52274	0.462054	3.2956	0.00098213	0.00933123
ENSGALG00000055021_GREM2	117.385	1.37142	0.416354	3.29388	0.00098813	0.00938187
ENSGALG00000005435	6.41086	-6.39382	1.94181	-3.29271	0.00099229	0.00941487
ENSGALG00000025764_FKBP10	179.179	1.29366	0.392943	3.29224	0.00099393	0.00942405
ENSGALG00000003078_MMD	1467.81	0.883718	0.268464	3.29175	0.00099564	0.00943387
ENSGALG00000007492_YME1L1	1941.27	-0.885486	0.269041	-3.29127	0.00099736	0.00944368
ENSGALG00000031960_LEF1	150.767	1.25504	0.381651	3.28844	0.00100743	0.00953262
ENSGALG00000009803_MGST2	558.469	-1.12113	0.3411	-3.2868	0.00101334	0.00958203
ENSGALG00000031094_EDA2R	38.5152	2.20895	0.672934	3.28257	0.00102865	0.00972011
ENSGALG00000028810_CHCHD10	725.263	0.92959	0.28322	3.28222	0.00102994	0.00972576
ENSGALG00000002179_FBF1	287.463	1.09219	0.332806	3.28176	0.00103162	0.009735
ENSGALG00000003201_FBXL8	162.864	-1.40932	0.429527	-3.2811	0.00103405	0.00975127
ENSGALG00000038540_ZBTB32	212.612	1.41119	0.430123	3.28091	0.00103475	0.00975127
ENSGALG00000004065_SLC25A16	326.947	-1.16178	0.354227	-3.27977	0.0010389	0.00978382
ENSGALG00000023670_NAALADL2	133.35	1.36733	0.417263	3.27689	0.00104957	0.00987755
ENSGALG00000031527_ARL8BL	185.868	1.34317	0.410048	3.27564	0.00105421	0.00991458
ENSGALG00000050645	41.8818	2.29963	0.702118	3.27528	0.00105557	0.00992063
ENSGALG00000016299_FAM83B	213.312	-1.88724	0.576251	-3.27503	0.00105649	0.00992264
ENSGALG00000012285_BAIAP2L2	296.474	-1.12055	0.342226	-3.27429	0.00105928	0.0099421
ENSGALG00000028543_FGFR4	708.368	-1.27141	0.388715	-3.27079	0.00107249	0.0100593
ENSGALG00000008663_DDAH1	76.6869	1.50739	0.461042	3.26952	0.00107729	0.0100975
ENSGALG00000004958_BTK	218.94	1.2077	0.369627	3.26735	0.00108558	0.0101478
ENSGALG00000012608_DAPK1	1273.79	-0.960426	0.293918	-3.26767	0.00108436	0.0101478
ENSGALG00000030781_CA2	1151.5	-1.24965	0.382434	-3.26763	0.00108454	0.0101478
ENSGALG00000047516	290.66	1.04064	0.318491	3.2674	0.00108539	0.0101478
ENSGALG00000033365_ALDH1A3	2064.89	-1.02657	0.314454	-3.26462	0.00109612	0.0102395
ENSGALG00000016817_RASA3	506.737	1.01604	0.311307	3.26378	0.00109938	0.0102631
ENSGALG00000012382	49.577	1.83339	0.561889	3.2629	0.00110279	0.010288
ENSGALG00000005346_PPIC	309.291	1.25749	0.38562	3.26095	0.00111039	0.0103382
ENSGALG00000005483_CDH13	1152.01	1.21881	0.373734	3.26117	0.00110954	0.0103382
ENSGALG00000011847_TTC26	45.0628	1.93026	0.591928	3.26096	0.00111035	0.0103382
ENSGALG00000006751_THY1	199.484	1.3331	0.408955	3.25976	0.00111506	0.0103747
ENSGALG00000011266_PPM1K	164.176	1.31005	0.402249	3.25682	0.00112666	0.0104756
ENSGALG00000006560_SEMA3A	198.831	1.24452	0.382308	3.25527	0.00113283	0.0105259
ENSGALG00000000551_C26H6orf89	655.223	-1.00478	0.308734	-3.25453	0.00113581	0.0105466
ENSGALG00000015152_BOC	215.951	1.16383	0.357732	3.25336	0.00114049	0.010583
ENSGALG00000007145_ITGB1	8794.52	0.971898	0.298804	3.25262	0.00114345	0.0106034
ENSGALG00000029673_TBC1D19	43.3067	1.92565	0.592066	3.25243	0.00114423	0.0106035
ENSGALG00000035068_DNAJC13	1598.81	-0.898464	0.276361	-3.25105	0.00114978	0.0106479
ENSGALG00000016967_ENOX1	131.325	1.34564	0.413991	3.25041	0.00115237	0.0106642
ENSGALG00000047248_DESI1	1649.31	-0.959839	0.295313	-3.25024	0.00115307	0.0106642
ENSGALG00000026215	50.4822	2.04746	0.630108	3.24938	0.00115659	0.0106825
ENSGALG00000048488	1106.12	1.29225	0.39767	3.24956	0.00115583	0.0106825
ENSGALG00000012420_CG-1B	146.076	1.43646	0.442279	3.24786	0.00116278	0.0107326
ENSGALG00000037989_IL10RB	411.829	-1.10385	0.339984	-3.24678	0.00116719	0.0107661
ENSGALG00000051442_TSC22D1	888.158	0.950709	0.292916	3.24567	0.00117175	0.0108011
ENSGALG00000015844_SOD1	999.53	-0.890926	0.274596	-3.2445	0.00117657	0.0108383
ENSGALG00000014988_POPDC2	136.73	1.51272	0.466504	3.24268	0.00118413	0.0109007
ENSGALG00000019755	16.4557	3.36316	1.03747	3.2417	0.00118821	0.0109311
ENSGALG00000030432_RASSF2	404.963	1.03462	0.319416	3.23911	0.00119904	0.0110164
ENSGALG00000030603_ANTXR1	212.711	1.26842	0.391596	3.2391	0.00119907	0.0110164
ENSGALG00000032149_OSBPL7	270.179	-1.20917	0.373411	-3.23818	0.00120294	0.0110446
ENSGALG00000026698_FEV	36.281	-2.10499	0.650216	-3.23737	0.00120636	0.0110688
ENSGALG00000054619_GAB2	78.5082	1.55201	0.479597	3.23606	0.0012119	0.0111123
ENSGALG00000007615_RAB11A	3488.01	-0.872285	0.269613	-3.23533	0.00121504	0.0111337
ENSGALG00000014873_GJA1	695.375	0.941412	0.291164	3.23327	0.00122381	0.0112068
ENSGALG00000001264_PLXNA2	100.921	1.3452	0.416357	3.23089	0.00123405	0.0112931
ENSGALG00000017644_COTL1	3007.08	-0.867907	0.268764	-3.22925	0.00124115	0.0113506
ENSGALG00000013098_MGST1	1069.95	-0.944764	0.292633	-3.22849	0.00124446	0.0113734
ENSGALG00000014821_THEMIS	70.3598	1.60273	0.496598	3.22742	0.00124911	0.0114084
ENSGALG00000033608_RAB12	187.034	1.20563	0.373899	3.22449	0.00126198	0.0115184
ENSGALG00000054374	157.303	-1.5537	0.482051	-3.2231	0.00126809	0.0115666
ENSGALG00000002792_SPDEF	254.741	-1.37675	0.427411	-3.22113	0.00127684	0.0116265
ENSGALG00000009062_CDK14	83.7961	1.46144	0.453713	3.22106	0.00127717	0.0116265
ENSGALG00000044260	1442.49	-0.855234	0.265504	-3.22118	0.00127666	0.0116265
ENSGALG00000011646_PLD4	61.3836	1.80413	0.560168	3.22069	0.00127882	0.0116319
ENSGALG00000026297	13.5108	5.47457	1.69988	3.22055	0.00127944	0.0116319
ENSGALG00000009825_SRGAP1	167.771	1.24878	0.387835	3.21987	0.00128249	0.0116521
ENSGALG00000004538_TNN	19.8668	-2.7676	0.859725	-3.21917	0.00128563	0.011673
ENSGALG00000046494_CASP10	82.514	-1.47616	0.45861	-3.21877	0.00128743	0.0116817
ENSGALG00000010325_PPP1R12A	3932.16	0.872685	0.271256	3.2172	0.00129447	0.0117373
ENSGALG00000040079_ZFPM2	66.8356	1.7457	0.542644	3.21703	0.00129524	0.0117373
ENSGALG00000012529_EIF3D	2270.24	0.857605	0.266611	3.21669	0.00129679	0.0117437
ENSGALG00000003886_SGCD	72.4642	1.56903	0.488193	3.21396	0.0013092	0.0118418
ENSGALG00000004695_ECM2	547.581	1.1024	0.343006	3.21393	0.00130932	0.0118418
ENSGALG00000006507_CLMP	569.37	1.08352	0.337263	3.2127	0.00131493	0.0118848
ENSGALG00000014978_IQGAP2	4492.28	-0.903544	0.281275	-3.21231	0.00131671	0.0118855
ENSGALG00000030706_MAP3K6	64.5704	-1.56386	0.486834	-3.21231	0.00131672	0.0118855
ENSGALG00000001101_MBD3	171.438	1.15879	0.360798	3.21175	0.00131929	0.011901
ENSGALG00000029892_LMO2	354.494	1.02656	0.319671	3.2113	0.00132135	0.0119042
ENSGALG00000049148	182.561	-1.30361	0.405935	-3.21138	0.00132097	0.0119042
ENSGALG00000004345_OIT3	97.0764	-1.4162	0.44106	-3.21091	0.00132314	0.0119049
ENSGALG00000014280_AICDA	38.3457	2.13674	0.665435	3.21105	0.00132253	0.0119049
ENSGALG00000026081_RBM38	291.37	1.33182	0.414822	3.21059	0.00132462	0.0119104
ENSGALG00000029383_SLC25A11	579.521	-0.985854	0.307264	-3.20849	0.00133435	0.0119902
ENSGALG00000023950_CR1L	1914.03	-1.2635	0.394045	-3.20649	0.00134364	0.0120581
ENSGALG00000033118_FAM83H	456.879	-1.06693	0.332739	-3.20651	0.00134353	0.0120581
ENSGALG00000003314_RILPL1	651.313	1.02556	0.319949	3.2054	0.00134874	0.0120883
ENSGALG00000032031_MMP16	187.303	1.52045	0.474322	3.20553	0.00134815	0.0120883
ENSGALG00000008629_MRC1	149.442	1.4238	0.444527	3.20296	0.00136022	0.0121759
ENSGALG00000030789_PGAP1	386.384	-0.990478	0.309257	-3.20277	0.00136114	0.0121759
ENSGALG00000043787_DEPDC6	803.096	0.888846	0.27751	3.20294	0.00136033	0.0121759
ENSGALG00000025557_RNase_MRP	8983.17	-1.21316	0.378807	-3.20257	0.00136206	0.0121763
ENSGALG00000003805	165.988	1.27276	0.397477	3.2021	0.00136428	0.0121852
ENSGALG00000019768_ACSF2	1269.08	-1.23276	0.384998	-3.20199	0.0013648	0.0121852
ENSGALG00000006882_ST8SIA2	25.9965	2.38733	0.745896	3.20062	0.00137134	0.0122357
ENSGALG00000039245_STAB2	51.6998	1.83331	0.572886	3.20014	0.00137363	0.0122483
ENSGALG00000015664_ADD1	1989.54	0.886048	0.276952	3.19928	0.0013777	0.0122767
ENSGALG00000012834_AKR1D1	395.699	-1.49715	0.468024	-3.19888	0.00137961	0.0122859
ENSGALG00000042293	19.0371	-2.90611	0.909004	-3.19702	0.00138854	0.0123575
ENSGALG00000001452_ATP5PB	1337.81	-0.935164	0.292583	-3.19623	0.00139234	0.0123834
ENSGALG00000003899_RAB17	166.684	-1.39737	0.437249	-3.19581	0.00139437	0.0123935
ENSGALG00000006253_ILKAP	336.211	0.992375	0.310574	3.19529	0.00139691	0.0124082
ENSGALG00000005071_MPP1	2808.58	-0.923223	0.289008	-3.19446	0.00140093	0.0124359
ENSGALG00000020679_PLEKHS1	324.841	-1.22735	0.384465	-3.19235	0.00141122	0.0125193
ENSGALG00000003025	63.5784	-1.5915	0.498788	-3.19075	0.00141906	0.0125728
ENSGALG00000013971_SGK1	1622.89	-0.906874	0.284206	-3.1909	0.0014183	0.0125728
ENSGALG00000030002_KRT18	1386.71	0.86641	0.271694	3.18892	0.00142804	0.0126443
ENSGALG00000014106_PPFIBP1	2792.82	0.947791	0.297318	3.1878	0.00143358	0.0126853
ENSGALG00000045642_TNFRSF11A	680.065	-0.921518	0.289203	-3.1864	0.00144055	0.0127389
ENSGALG00000008088_ACSL4	845.32	-1.14953	0.360796	-3.18608	0.00144215	0.012745
ENSGALG00000030081_SKAP2	491.885	-0.98626	0.309648	-3.1851	0.00144702	0.0127799
ENSGALG00000032161_SCUBE2	143.972	1.31914	0.414357	3.18357	0.00145471	0.0128396
ENSGALG00000034119	149.924	1.55688	0.489087	3.18324	0.00145636	0.012846
ENSGALG00000008193_RELN	457.497	0.952141	0.299206	3.18223	0.00146145	0.0128828
ENSGALG00000008309	6.64711	6.09103	1.91524	3.1803	0.00147122	0.0129607
ENSGALG00000005340_SLC35A3	759.445	-1.03852	0.326618	-3.17961	0.00147475	0.0129836
ENSGALG00000005043	26.2883	2.48889	0.783218	3.17777	0.0014841	0.0130494
ENSGALG00000039498_PPP3CA	584.806	0.912476	0.287139	3.17782	0.00148388	0.0130494
ENSGALG00000005475_RHOGL	786.838	-1.00309	0.315833	-3.17603	0.00149304	0.0131197
ENSGALG00000052873_MAPKBP1	635.223	0.973335	0.306562	3.175	0.00149836	0.0131581
ENSGALG00000011715_HSPA2	5495.89	1.40416	0.442627	3.17233	0.00151222	0.0132715
ENSGALG00000007638_HMOX2	364.967	0.996807	0.314297	3.17155	0.0015163	0.0132906
ENSGALG00000043672_STAB1	1207.31	1.07248	0.338157	3.17156	0.00151623	0.0132906
ENSGALG00000016590_TLR7	209.07	1.26025	0.397583	3.16978	0.00152555	0.0133632
ENSGALG00000050133	130.96	1.44728	0.456614	3.1696	0.00152651	0.0133632
ENSGALG00000005982_KLHL9	460.828	1.18474	0.373821	3.16927	0.00152822	0.0133674
ENSGALG00000034999_ZHX1	702.353	0.915947	0.289021	3.16914	0.00152891	0.0133674
ENSGALG00000015849_ME1	936.259	-1.30004	0.410413	-3.16763	0.00153686	0.0134201
ENSGALG00000019094_PHF11	179.002	-1.18582	0.374338	-3.16778	0.00153608	0.0134201
ENSGALG00000013817_SPIRE1	94.4744	1.41883	0.448137	3.16606	0.0015452	0.0134844
ENSGALG00000006891_ITIH5	930.511	0.976761	0.3086	3.16513	0.00155013	0.013519
ENSGALG00000050749	23.1931	-2.76967	0.875525	-3.16344	0.00155919	0.0135895
ENSGALG00000014386_SEPSECS	296.855	-1.19058	0.376467	-3.16252	0.00156411	0.0136238
ENSGALG00000046187_PARP12	1065.14	-0.97566	0.308572	-3.16185	0.0015677	0.0136465
ENSGALG00000012595_AGTPBP1	197.283	1.22398	0.387148	3.16154	0.00156936	0.0136522
ENSGALG00000038599_PMM1	662.561	-0.919533	0.290866	-3.16137	0.00157031	0.0136522
ENSGALG00000001826_WWC1	842.906	-1.09695	0.347034	-3.16094	0.00157261	0.0136636
ENSGALG00000009885_HELB	431.068	-0.988226	0.312719	-3.16011	0.00157708	0.0136859
ENSGALG00000044002	23.6373	-2.45898	0.778134	-3.1601	0.00157714	0.0136859
ENSGALG00000008569_CHP1	1731.44	-0.887642	0.280948	-3.15946	0.00158064	0.0137077
ENSGALG00000007289_CLPX	986.419	-0.914067	0.289354	-3.15899	0.00158318	0.0137212
ENSGALG00000008759_LAMP3	103.56	1.59721	0.505677	3.15855	0.00158554	0.0137331
ENSGALG00000028484_TMED7	775.188	-0.888179	0.281264	-3.15781	0.00158958	0.0137595
ENSGALG00000008567	58.7086	1.72234	0.545512	3.1573	0.00159239	0.0137753
ENSGALG00000002294_SEMA6A	157.463	1.27982	0.405544	3.1558	0.00160058	0.0138376
ENSGALG00000004437_LHFPL2	143.969	-1.59016	0.504304	-3.15319	0.00161499	0.0139534
ENSGALG00000029324	331.782	-1.00114	0.31762	-3.152	0.00162157	0.0140016
ENSGALG00000007839_NCAM1	248.514	1.04939	0.332953	3.15177	0.00162285	0.014004
ENSGALG00000002925_ETFA	1398.34	-0.885569	0.281007	-3.15142	0.0016248	0.0140121
ENSGALG00000036310	1143.85	-0.911776	0.289542	-3.14903	0.00163813	0.0141183
ENSGALG00000014166_TSPO	287.439	1.17847	0.374509	3.1467	0.00165123	0.0142224
ENSGALG00000002542_GUSB	674.594	-0.894676	0.284361	-3.14626	0.00165371	0.014235
ENSGALG00000013579_FAT1	11391.5	-0.80059	0.254511	-3.1456	0.00165747	0.0142497
ENSGALG00000023089_SSBP2	296.73	1.1115	0.353331	3.14577	0.00165649	0.0142497
ENSGALG00000038688_ADAMTS17	71.4126	-1.532	0.487062	-3.14539	0.00165866	0.0142511
ENSGALG00000043080_CCDC85A	155.802	1.44667	0.460278	3.14304	0.00167202	0.0143571
ENSGALG00000015995_PTPRA	930.834	0.877851	0.279345	3.14253	0.00167496	0.0143646
ENSGALG00000035504_ETV1	212.727	1.06627	0.339291	3.14265	0.00167425	0.0143646
ENSGALG00000032882_EVA1C	102.689	1.31188	0.417638	3.14118	0.00168269	0.014422
ENSGALG00000042819	85.1251	-1.4889	0.474164	-3.14005	0.00168917	0.0144686
ENSGALG00000045366	66.0984	-1.84092	0.586371	-3.13951	0.0016923	0.0144865
ENSGALG00000008859_WDR31	35.125	-2.11573	0.674531	-3.1366	0.0017092	0.0146223
ENSGALG00000030157_MCTP2	773.989	1.03867	0.331436	3.13384	0.00172532	0.0147511
ENSGALG00000005337_SNX2	2290.03	-0.852543	0.27209	-3.13331	0.00172848	0.014769
ENSGALG00000007284_SYP	26.7779	2.29143	0.731371	3.13306	0.00172996	0.0147726
ENSGALG00000002314_CDHR1	14.3395	5.55978	1.77558	3.13125	0.00174062	0.0148545
ENSGALG00000006076_RASGEF1C	219.767	-1.11519	0.356173	-3.13102	0.00174201	0.0148573
ENSGALG00000003294_ATAD5	332.673	-0.973467	0.310967	-3.13046	0.00174535	0.0148767
ENSGALG00000051534	133.304	1.27431	0.407114	3.13009	0.00174751	0.0148859
ENSGALG00000035369	326.338	1.03675	0.331454	3.12788	0.00176073	0.0149894
ENSGALG00000010286_DLST	1076.12	-0.862151	0.275679	-3.12737	0.00176377	0.0149986
ENSGALG00000013605_CARMIL1	806.712	-0.962763	0.307854	-3.12734	0.00176397	0.0149986
ENSGALG00000010769_HPGD	6198.33	-1.1117	0.355697	-3.1254	0.00177564	0.0150886
ENSGALG00000009236_AGPS	604.899	0.912174	0.291878	3.12519	0.00177691	0.0150902
ENSGALG00000006969_USP28	88.756	1.42816	0.457082	3.12451	0.001781	0.0151065
ENSGALG00000017321_PLEKHB1	396.688	1.09909	0.351746	3.12468	0.00177998	0.0151065
ENSGALG00000014984_F2RL1	548.723	-1.27198	0.407154	-3.12407	0.0017837	0.01511
ENSGALG00000016897_GPR180	395.229	-1.06746	0.341725	-3.12373	0.00178575	0.01511
ENSGALG00000041373_ARAP2	1901.83	-0.859913	0.275255	-3.12406	0.00178374	0.01511
ENSGALG00000049493	13.2089	5.44237	1.74222	3.12381	0.00178527	0.01511
ENSGALG00000037669_FKBP9	1114.61	1.05251	0.337343	3.12001	0.00180844	0.0152926
ENSGALG00000040424_SCNN1A	118.305	1.93786	0.621244	3.11931	0.00181272	0.0153195
ENSGALG00000000209_PRNP	240.718	1.04099	0.333757	3.11899	0.00181472	0.0153271
ENSGALG00000009871_RCOR3	235.046	1.04748	0.336026	3.11727	0.00182535	0.0154076
ENSGALG00000010189	2620.89	-1.15606	0.370925	-3.1167	0.00182889	0.0154281
ENSGALG00000007139_FAM107A	17.5293	-2.83695	0.910898	-3.11445	0.00184286	0.0155365
ENSGALG00000010721_GLIS1	37.6413	1.94868	0.625799	3.1139	0.0018463	0.0155484
ENSGALG00000013057	142.437	-1.26633	0.406675	-3.11387	0.00184651	0.0155484
ENSGALG00000022874_RAB31	127.256	1.28061	0.411352	3.11316	0.00185096	0.0155765
ENSGALG00000009438_SLC39A9	1695.68	-0.942449	0.302753	-3.11293	0.00185238	0.0155791
ENSGALG00000003174_RIMS3	34.3007	1.9799	0.63692	3.10855	0.00188005	0.0158022
ENSGALG00000004323_RASAL2	1112.28	0.997898	0.321173	3.10704	0.0018897	0.0158737
ENSGALG00000006190_FHL1	479.542	1.16731	0.375757	3.10655	0.00189283	0.0158883
ENSGALG00000047506	7.71181	-6.45504	2.07797	-3.10641	0.00189372	0.0158883
ENSGALG00000010149_CMTR1	636.921	-0.903958	0.291021	-3.10616	0.00189532	0.0158922
ENSGALG00000009493_TMEM229B	332.804	-0.976862	0.314622	-3.10487	0.00190361	0.015952
ENSGALG00000006420_ABHD17C	833.09	-1.02232	0.329534	-3.10232	0.0019201	0.0160806
ENSGALG00000010246_OSBPL8	948.782	0.85663	0.276182	3.10169	0.00192419	0.0160955
ENSGALG00000015075_B3GAT1L	18.0669	2.74657	0.885463	3.10185	0.00192316	0.0160955
ENSGALG00000029502_CLIC2	413.268	0.930175	0.299919	3.10142	0.00192597	0.0161007
ENSGALG00000046023_NAXE	374.785	-0.990686	0.319515	-3.1006	0.00193131	0.0161356
ENSGALG00000016693_CSF2RA	57.5004	1.58959	0.512737	3.10021	0.00193384	0.016147
ENSGALG00000043828_HEXA	1314.44	-1.1047	0.35647	-3.09899	0.00194184	0.0162042
ENSGALG00000041408	53.6056	1.73431	0.559746	3.09839	0.00194578	0.0162273
ENSGALG00000005321_LAMA5	735.687	0.933847	0.301605	3.09625	0.00195982	0.0163248
ENSGALG00000005403_DHRS11	386.29	-1.08584	0.350682	-3.09636	0.00195914	0.0163248
ENSGALG00000032465_ATP8	411.102	-0.965658	0.312095	-3.09412	0.00197399	0.016433
ENSGALG00000006446_NAP1L4	1393.31	0.866115	0.279992	3.09336	0.00197907	0.0164477
ENSGALG00000036747_TTC31	354.579	-1.23527	0.399356	-3.09314	0.00198048	0.0164477
ENSGALG00000040891_RSU1	654.643	0.999651	0.323139	3.09356	0.0019777	0.0164477
ENSGALG00000044668	17.3308	3.37437	1.09086	3.09331	0.00197937	0.0164477
ENSGALG00000001640_RNF122	92.5471	1.47573	0.477731	3.08903	0.00200808	0.0166669
ENSGALG00000003295_ADAMTS12	305.498	1.15929	0.37536	3.08847	0.00201191	0.0166888
ENSGALG00000015151_B4GALT6	227.19	1.0328	0.33454	3.08724	0.00202024	0.0167479
ENSGALG00000000681_PAK1	1083.74	-1.05606	0.342092	-3.08705	0.0020215	0.0167484
ENSGALG00000025977_GADD45A	332.423	0.99596	0.322728	3.08607	0.0020282	0.0167939
ENSGALG00000049450	2904.46	-0.823878	0.267153	-3.08392	0.00204294	0.0169059
ENSGALG00000008349_LMCD1	334.976	0.955268	0.309883	3.08267	0.00205152	0.0169615
ENSGALG00000039216_COL6A2	7412.06	1.12798	0.36592	3.08259	0.0020521	0.0169615
ENSGALG00000039764	20.8843	3.32023	1.07738	3.08176	0.00205778	0.0169984
ENSGALG00000015864_IBTK	1922.63	-1.05853	0.343633	-3.0804	0.00206726	0.0170589
ENSGALG00000028046_INSIG2	970.625	-1.24833	0.405256	-3.08035	0.00206756	0.0170589
ENSGALG00000008606_NDUFS1	1821.59	-0.878567	0.285322	-3.07921	0.00207548	0.0171141
ENSGALG00000028908_HOXA6	90.622	1.33431	0.433418	3.07858	0.00207988	0.0171403
ENSGALG00000039704_SEC22B	691.752	-0.88473	0.287459	-3.07776	0.0020856	0.0171671
ENSGALG00000041418_NDUFS2	726.84	-0.905869	0.294314	-3.0779	0.00208468	0.0171671
ENSGALG00000008914_NRAP	37.6618	-2.26262	0.735264	-3.07729	0.00208893	0.0171843
ENSGALG00000031331_PKIG	109.275	1.25289	0.407264	3.07637	0.00209538	0.0172272
ENSGALG00000013851_UBE3B	288.473	-1.01546	0.330129	-3.07596	0.00209827	0.0172408
ENSGALG00000000824	213.991	-1.18836	0.3864	-3.07547	0.00210168	0.0172586
ENSGALG00000035266_ANOS1	126.974	1.22089	0.397039	3.07499	0.0021051	0.0172765
ENSGALG00000031582_RAB1B	2471.79	-0.808698	0.263154	-3.0731	0.00211849	0.0173658
ENSGALG00000037402_NOV	405.348	1.17818	0.383382	3.07312	0.00211836	0.0173658
ENSGALG00000003348	75.8634	-1.4168	0.461203	-3.07197	0.00212652	0.0174214
ENSGALG00000008586_TUBB4B	4431.52	-0.915787	0.298157	-3.07149	0.00212991	0.017439
ENSGALG00000031546	99.7161	1.49271	0.486092	3.07083	0.00213462	0.0174673
ENSGALG00000017229_FAT3	335.902	1.03289	0.336631	3.06831	0.00215275	0.0176053
ENSGALG00000001545_RAB40B	153.931	-1.34829	0.43953	-3.06757	0.00215808	0.0176346
ENSGALG00000001573_P2RX1	159.385	1.20996	0.394471	3.06728	0.00216014	0.0176346
ENSGALG00000032220_ELN	410.383	1.22074	0.397985	3.06731	0.00215995	0.0176346
ENSGALG00000044675_MATN2	573.503	-1.13497	0.370135	-3.06636	0.00216685	0.017679
ENSGALG00000001130_GALNT17	52.7846	1.91347	0.624155	3.0657	0.00217164	0.0177077
ENSGALG00000053916_ABCB1	9098.26	-1.04319	0.340369	-3.06489	0.00217753	0.0177453
ENSGALG00000008447_SH2D1A	39.233	2.00699	0.655197	3.06318	0.00218999	0.0178364
ENSGALG00000016920_LMO7	4906.74	-0.826609	0.269932	-3.06228	0.00219657	0.0178795
ENSGALG00000029360	1331.35	-0.835	0.272784	-3.06103	0.00220578	0.017944
ENSGALG00000012906_CDH20	17.746	2.9293	0.957148	3.06044	0.00221009	0.0179686
ENSGALG00000002001_STXBP3	725.092	-0.873525	0.285454	-3.06013	0.00221243	0.0179737
ENSGALG00000037852_HSD17B7	112.489	-1.32575	0.433251	-3.06001	0.0022133	0.0179737
ENSGALG00000042621_HNF4G	1728.56	-0.935757	0.305842	-3.05961	0.00221622	0.0179869
ENSGALG00000016687_P2RY8	253.128	1.17648	0.38455	3.05936	0.00221812	0.0179918
ENSGALG00000009836_ELMOD2	251.882	-1.01068	0.33044	-3.05859	0.00222378	0.0180272
ENSGALG00000027232_C1QTNF2	88.7964	1.36336	0.445851	3.05789	0.00222904	0.0180594
ENSGALG00000008918_LAMP5	83.019	1.51552	0.495783	3.05683	0.00223693	0.0181127
ENSGALG00000008439_CD36	2028.19	-3.03327	0.99259	-3.05591	0.00224377	0.0181576
ENSGALG00000035182_CMKLR1	101.758	1.30917	0.428533	3.05501	0.00225049	0.0182014
ENSGALG00000002562_ARAP3	394.316	1.09344	0.358079	3.05362	0.00226098	0.0182756
ENSGALG00000012919_YARS2	147.838	-1.16527	0.382068	-3.04991	0.00228909	0.0184727
ENSGALG00000027786_SOCS3	38.5623	1.94437	0.637481	3.05007	0.00228784	0.0184727
ENSGALG00000042103_C5H11ORF96	722.385	0.924465	0.303115	3.04988	0.00228935	0.0184727
ENSGALG00000043103_PKNOX2	31.83	2.0429	0.669945	3.04935	0.00229336	0.0184944
ENSGALG00000028851_RAB8A	1221.46	-0.888631	0.291449	-3.04901	0.00229593	0.0185044
ENSGALG00000010641_SCCPDH	2031.88	-0.893334	0.293197	-3.04687	0.00231236	0.018626
ENSGALG00000035690_RAPGEFL1	311.204	-1.26074	0.414036	-3.045	0.0023268	0.0187207
ENSGALG00000040910_COA7	297.784	-0.980277	0.321915	-3.04514	0.00232573	0.0187207
ENSGALG00000038440_COQ10B	49.5118	1.65994	0.54517	3.04482	0.00232823	0.0187213
ENSGALG00000005763_VILL	27.5985	2.43547	0.800312	3.04315	0.00234116	0.0187927
ENSGALG00000007337_LPP	977.124	0.832412	0.273521	3.04332	0.00233984	0.0187927
ENSGALG00000016350_ARHGEF10	225.619	1.4086	0.46287	3.04318	0.0023409	0.0187927
ENSGALG00000026547_TPGS2	170.347	-1.15417	0.379295	-3.04295	0.00234275	0.0187946
ENSGALG00000047148_LIPT2	448.655	-1.14035	0.374934	-3.04147	0.00235425	0.0188761
ENSGALG00000028568_DNAL1	147.274	1.23369	0.406056	3.03822	0.00237977	0.0190696
ENSGALG00000011499_SCARB2	358.655	0.945904	0.311671	3.03494	0.00240581	0.0192672
ENSGALG00000003113_RGS14	127.148	1.19863	0.39521	3.0329	0.00242212	0.0193867
ENSGALG00000011880_BBS7	61.1764	1.50817	0.497339	3.03248	0.00242552	0.0194027
ENSGALG00000031284_PTPRM	397.815	0.988774	0.326107	3.03205	0.00242898	0.0194193
ENSGALG00000002931_REG4	699.361	-0.996271	0.328657	-3.03134	0.00243472	0.019454
ENSGALG00000012290_SOX10	66.855	1.52381	0.502844	3.03039	0.00244239	0.0195041
ENSGALG00000020788	468.942	1.1363	0.375023	3.02996	0.00244586	0.0195206
ENSGALG00000011298_RARB	81.9651	1.48547	0.490395	3.02914	0.00245253	0.0195626
ENSGALG00000002016_PRKCD	898.717	-0.842954	0.27837	-3.02818	0.00246033	0.0196136
ENSGALG00000005506_HESX1	33.5362	-2.18722	0.722437	-3.02756	0.0024654	0.0196428
ENSGALG00000003357_FKBP8	611.197	-0.963914	0.318401	-3.02736	0.00246699	0.0196442
ENSGALG00000002666_RAB11FIP3	557.342	-0.894117	0.2954	-3.0268	0.00247156	0.0196693
ENSGALG00000001895_PANK3	1528.97	-0.819695	0.270865	-3.02621	0.00247639	0.0196965
ENSGALG00000004859_ZNFX1	1729.02	-0.869173	0.287442	-3.02382	0.00249602	0.0198117
ENSGALG00000013892_MAP3K5	577.161	-0.897214	0.296739	-3.02359	0.00249799	0.0198117
ENSGALG00000031824_HOOK2	562.32	-1.06629	0.352647	-3.02367	0.00249726	0.0198117
ENSGALG00000050471	18.7609	-2.77611	0.917979	-3.02415	0.00249333	0.0198117
ENSGALG00000054931	119.103	1.22722	0.405812	3.0241	0.00249373	0.0198117
ENSGALG00000050875_ITGB7	37.5852	2.0467	0.677009	3.02314	0.00250163	0.0198292
ENSGALG00000041361_ARFIP1	853.753	-0.830232	0.274673	-3.02262	0.00250597	0.0198524
ENSGALG00000006047_TPRA1	650.42	-0.91036	0.301303	-3.02141	0.00251601	0.0198754
ENSGALG00000014851_FBXO4	59.0572	-1.54498	0.511259	-3.02192	0.00251181	0.0198754
ENSGALG00000015537_MAN2B2	1195.18	-0.837033	0.277011	-3.02166	0.00251391	0.0198754
ENSGALG00000042478_ND4L	851.264	-0.99269	0.328543	-3.02149	0.00251532	0.0198754
ENSGALG00000045246_GOLIM4	2519.43	0.944352	0.312489	3.02204	0.00251081	0.0198754
ENSGALG00000014477_CD4	125.538	1.19033	0.39415	3.02	0.00252778	0.019957
ENSGALG00000051466_NDFIP2	454.601	-0.922203	0.305425	-3.01941	0.00253269	0.0199845
ENSGALG00000027173	195.818	1.08146	0.358404	3.01743	0.00254926	0.0201038
ENSGALG00000048486	11.0888	5.18703	1.72006	3.01561	0.00256459	0.0202132
ENSGALG00000015898_MYO6	2194.79	-0.840132	0.278627	-3.01526	0.00256761	0.0202255
ENSGALG00000008445_SLC24A3	206.053	1.09152	0.362039	3.01492	0.00257047	0.0202366
ENSGALG00000002197_NPM1	9342.77	0.843672	0.279849	3.01475	0.00257195	0.0202369
ENSGALG00000027629_GNG2	170.387	1.07989	0.358308	3.01387	0.00257943	0.0202842
ENSGALG00000022909_PTPN3	427.58	-0.920728	0.305625	-3.01261	0.00259012	0.0203568
ENSGALG00000002955_ADAMTSL2	89.1338	1.69531	0.562841	3.01205	0.00259487	0.0203826
ENSGALG00000007150_OPA1	1049.69	-0.962399	0.319572	-3.01153	0.00259938	0.0204065
ENSGALG00000035187_FHL3	507.775	0.878876	0.292131	3.0085	0.00262544	0.0205879
ENSGALG00000053886	6910.19	1.03937	0.345468	3.00859	0.00262466	0.0205879
ENSGALG00000006027_TM6SF1	62.0787	1.6317	0.542525	3.00761	0.00263311	0.0206364
ENSGALG00000021525_ISLR	282.766	1.08659	0.361472	3.00602	0.00264688	0.0207327
ENSGALG00000006334_LAP3	369.313	-1.01824	0.338873	-3.00477	0.00265777	0.0208063
ENSGALG00000040663	625.723	-0.883893	0.294234	-3.00405	0.00266416	0.0208445
ENSGALG00000008072_CHRDL1	683.001	1.08838	0.362435	3.00296	0.0026737	0.0208957
ENSGALG00000025738_RHOU	254.299	-1.10668	0.368522	-3.00302	0.00267316	0.0208957
ENSGALG00000030969_CLEC3B	2480.82	1.0036	0.334301	3.00209	0.00268135	0.0209438
ENSGALG00000005330_SNCAIP	165.115	1.21723	0.405493	3.00185	0.00268341	0.020948
ENSGALG00000054252_TM4SF1	10.0537	-3.88467	1.29486	-3.00006	0.00269923	0.0210597
ENSGALG00000010542_PAPSS1	481.946	0.896758	0.299071	2.99848	0.00271328	0.0211575
ENSGALG00000010988_MPP6	119.071	1.44857	0.48328	2.99737	0.00272322	0.0212231
ENSGALG00000003285_CDHR2	5440.99	-1.21942	0.406912	-2.99676	0.00272864	0.0212535
ENSGALG00000007025_CPNE8	155.972	1.11605	0.372578	2.99549	0.00274006	0.0213305
ENSGALG00000034983_CDX2	352.146	-1.12429	0.37544	-2.99461	0.002748	0.0213803
ENSGALG00000005622_ARF4	1517.5	-0.851571	0.284391	-2.99437	0.00275015	0.0213851
ENSGALG00000038776_SYDE2	208.333	1.04428	0.348854	2.99347	0.0027582	0.0214357
ENSGALG00000010202_ENTPD5	920.278	-1.07647	0.35965	-2.9931	0.00276161	0.0214503
ENSGALG00000008270_CALHM2	52.479	1.80194	0.602346	2.99153	0.00277581	0.0215399
ENSGALG00000009594_RARRES1	865.292	0.883611	0.295376	2.99148	0.00277625	0.0215399
ENSGALG00000038154_YAP1	1174.09	0.810331	0.270953	2.99067	0.00278366	0.0215853
ENSGALG00000015111_APBA1	260.649	0.973793	0.325691	2.98993	0.00279043	0.0216258
ENSGALG00000011414_AMDHD1	42.5144	-1.95881	0.655259	-2.98936	0.00279563	0.021642
ENSGALG00000021686	86.5395	-1.42395	0.476321	-2.98948	0.0027945	0.021642
ENSGALG00000027963_COX7C	986.453	-0.868521	0.290579	-2.98893	0.00279957	0.0216605
ENSGALG00000003281_GSS	484.033	-0.956968	0.320204	-2.98862	0.00280239	0.0216703
ENSGALG00000006822_PCDH19	139.835	1.25712	0.421076	2.98549	0.00283122	0.021881
ENSGALG00000010435_RASGRP3	100.622	1.49635	0.501346	2.98466	0.00283898	0.0219288
ENSGALG00000015624_VCAN	645.437	1.27158	0.426301	2.98281	0.00285612	0.0220368
ENSGALG00000016808	601.279	-0.856712	0.2872	-2.98298	0.00285461	0.0220368
ENSGALG00000051915	23.5374	-2.54873	0.854593	-2.98239	0.00286006	0.022055
ENSGALG00000016820_GAS6	176.346	1.15257	0.386506	2.98202	0.00286355	0.0220696
ENSGALG00000005772_BOK	187.757	1.06828	0.358327	2.98131	0.00287018	0.0221085
ENSGALG00000016034_ATRN	3096.76	-0.817143	0.274211	-2.97998	0.00288268	0.0221925
ENSGALG00000003034_SS2	91.6366	1.38136	0.463821	2.97821	0.00289936	0.0223086
ENSGALG00000037540_PLEKHO1	324.968	0.962682	0.323285	2.97781	0.00290315	0.0223254
ENSGALG00000005750_SWAP70	861.359	0.88579	0.297624	2.97621	0.00291838	0.0224301
ENSGALG00000044606_MEP1B	3430.77	-1.26829	0.426384	-2.97453	0.00293434	0.0225403
ENSGALG00000035492_ELMO1	453.982	0.929178	0.312485	2.97351	0.00294414	0.0226031
ENSGALG00000016852_TNFSF13B	133.695	1.30503	0.438999	2.97273	0.00295165	0.0226483
ENSGALG00000026875	11.1531	4.13058	1.39025	2.9711	0.00296732	0.022756
ENSGALG00000048022	43.5282	-2.42552	0.816598	-2.97027	0.00297539	0.0228053
ENSGALG00000034376	167.051	1.13195	0.381453	2.96747	0.00300262	0.0230013
ENSGALG00000014857	15233.6	-1.16581	0.392985	-2.96655	0.00301157	0.0230507
ENSGALG00000041575_PPP1R14C	43.7927	1.96865	0.663634	2.96647	0.00301238	0.0230507
ENSGALG00000030511_SLC19A1	665.047	-0.841025	0.283536	-2.96621	0.00301498	0.023058
ENSGALG00000014674_CLSTN3	159.657	1.11157	0.374819	2.96563	0.00302068	0.0230889
ENSGALG00000009168_AFF2	689.134	0.846547	0.285523	2.96489	0.00302788	0.0231312
ENSGALG00000006646_ABCC1	776.985	0.88093	0.297187	2.96422	0.00303446	0.0231688
ENSGALG00000002363_HSPA9	2827.86	-0.857391	0.289331	-2.96336	0.00304303	0.0231846
ENSGALG00000002816_STK10	1773.09	0.87441	0.295035	2.96375	0.00303917	0.0231846
ENSGALG00000003675_PRKAR1B	231.358	1.04539	0.352755	2.9635	0.00304159	0.0231846
ENSGALG00000011235_GALNT15	88.5531	1.28609	0.434001	2.96334	0.0030432	0.0231846
ENSGALG00000001741_NPTN	1709.68	-0.814599	0.274928	-2.96295	0.00304706	0.0232013
ENSGALG00000005930_PLS3	2152.86	-0.780713	0.263522	-2.9626	0.00305049	0.0232148
ENSGALG00000028602_HMP19	33.263	1.89768	0.640704	2.96186	0.00305789	0.0232583
ENSGALG00000042895_BCAR1	753.01	-1.15905	0.391393	-2.96135	0.00306292	0.0232839
ENSGALG00000017246_ME3	87.2313	1.35653	0.458177	2.96071	0.0030693	0.0233196
ENSGALG00000026182_CTTNBP2NL	574.932	0.970384	0.32784	2.95993	0.00307706	0.0233659
ENSGALG00000034590_CELF2	314.754	0.964019	0.32587	2.95829	0.00309352	0.023478
ENSGALG00000010406_TMEM63C	94.9618	1.27798	0.432169	2.95713	0.00310519	0.0235537
ENSGALG00000026384_PCSK4	8.31602	-5.31043	1.79594	-2.95691	0.00310736	0.0235574
ENSGALG00000002846_NEURL1B	277.58	0.986905	0.333849	2.95614	0.00311512	0.0236033
ENSGALG00000033694_IFI30	984.195	0.874703	0.295996	2.95512	0.00312549	0.0236691
ENSGALG00000001564_ATP2A3	1403.7	0.957127	0.32398	2.95428	0.00313401	0.0237206
ENSGALG00000047853	11.598	3.67093	1.24274	2.95391	0.00313777	0.0237362
ENSGALG00000025991_GLOD5	13.8638	-3.52485	1.19375	-2.95274	0.00314966	0.0238132
ENSGALG00000014881_FAM184A	113.452	1.21164	0.410591	2.95097	0.00316782	0.0239375
ENSGALG00000010733_CEP170	404.313	0.933639	0.316512	2.94978	0.00318004	0.0240038
ENSGALG00000031275_TUBB6	1152.14	1.04533	0.354375	2.94979	0.00317993	0.0240038
ENSGALG00000007931_DLD	1395.21	-0.785219	0.266264	-2.94903	0.00318773	0.0240488
ENSGALG00000008625_ANAPC2	314.518	0.995588	0.337645	2.94862	0.00319195	0.0240676
ENSGALG00000015215_MAPRE2	880.259	0.81768	0.277339	2.9483	0.00319525	0.0240794
ENSGALG00000011288_DACT2	78.4837	1.42341	0.482858	2.94789	0.00319955	0.0240857
ENSGALG00000037020_SCT	659.78	-4.6116	1.56431	-2.948	0.00319833	0.0240857
ENSGALG00000001688_SEPT5	1039.77	0.80751	0.273966	2.94748	0.00320377	0.0241045
ENSGALG00000001229_SKI	653.046	0.845339	0.286874	2.94672	0.00321161	0.0241259
ENSGALG00000032298	19.0753	-2.55017	0.865431	-2.9467	0.00321181	0.0241259
ENSGALG00000038933_FABP7	56.2226	1.51201	0.513096	2.94683	0.00321049	0.0241259
ENSGALG00000033919	108.47	1.46815	0.498302	2.9463	0.00321596	0.024144
ENSGALG00000039705_GFPT2	172.72	1.15466	0.391987	2.94565	0.00322276	0.024182
ENSGALG00000010201_ABHD18	396.911	-0.93785	0.31846	-2.94496	0.00322998	0.0242231
ENSGALG00000014222_NUP50	1699.61	-0.795786	0.270287	-2.94423	0.00323758	0.024267
ENSGALG00000009915_EML4	2700.51	-0.81508	0.276868	-2.94392	0.00324079	0.024278
ENSGALG00000034898_ITPK1	1535.96	-0.909295	0.308899	-2.94366	0.00324356	0.0242857
ENSGALG00000009926_HAAO	22.8028	-2.4164	0.821025	-2.94315	0.00324887	0.0243124
ENSGALG00000010764_FBXO8	359.161	-1.09932	0.373966	-2.93964	0.00328593	0.0245765
ENSGALG00000034834_WWC3	424.8	1.17553	0.400024	2.93863	0.00329663	0.0246433
ENSGALG00000000048	21.02	2.75726	0.938342	2.93844	0.0032987	0.0246455
ENSGALG00000032598_MYO1A	7347.79	-0.96987	0.330109	-2.93802	0.00330311	0.0246653
ENSGALG00000052324	312.307	-1.21861	0.415005	-2.93637	0.00332077	0.0247838
ENSGALG00000050178	81.1367	-1.39928	0.476687	-2.93543	0.00333089	0.024846
ENSGALG00000007253_IL1RAP	73.6627	1.39186	0.474276	2.93471	0.00333857	0.0248899
ENSGALG00000005637_GBF1	1264.61	-0.843818	0.287701	-2.93297	0.00335734	0.0250165
ENSGALG00000013205_ETNK1	690.848	-0.950992	0.324263	-2.93278	0.00335944	0.0250187
ENSGALG00000007000_NR2F2	489.013	0.890596	0.303952	2.93006	0.00338897	0.0252252
ENSGALG00000007439_PRELID3B	783.744	-0.912321	0.311399	-2.92975	0.00339232	0.0252366
ENSGALG00000015233_ATP1B1	4956.48	-0.768036	0.262268	-2.92844	0.0034067	0.02533
ENSGALG00000016555_HADHB	1038.21	-0.8732	0.298292	-2.92734	0.00341879	0.0254064
ENSGALG00000007955_SLC16A5	395.345	1.18618	0.405234	2.92716	0.00342076	0.0254074
ENSGALG00000003412	288.691	0.990475	0.338519	2.9259	0.00343457	0.0254957
ENSGALG00000038924_IDE	619.539	-0.888484	0.303678	-2.92575	0.0034363	0.0254957
ENSGALG00000040364_HERPUD2	794.082	-0.87798	0.300121	-2.92542	0.00343995	0.0255091
ENSGALG00000040484_SEC31A	1783.55	-0.771924	0.263894	-2.92513	0.0034431	0.0255189
ENSGALG00000039264_SLA	133.822	1.21911	0.416814	2.92482	0.00344659	0.0255311
ENSGALG00000037241_KCNAB2	88.9716	1.27073	0.434529	2.9244	0.00345123	0.0255384
ENSGALG00000043393_CADM2	18.8333	-2.7109	0.926982	-2.92443	0.00345085	0.0255384
ENSGALG00000005710_CTDSPL	619.277	0.953808	0.326408	2.92214	0.0034764	0.0256784
ENSGALG00000010026_PPP1CB	1889.32	0.779733	0.266846	2.92203	0.00347754	0.0256784
ENSGALG00000014233_FBLN1	1260.16	0.991129	0.339179	2.92214	0.00347632	0.0256784
ENSGALG00000017276	1058.9	-1.07238	0.366971	-2.92226	0.00347499	0.0256784
ENSGALG00000002706_XRN1	1043.91	-0.798627	0.273465	-2.9204	0.00349581	0.0257997
ENSGALG00000002198_FHOD1	280.405	0.947834	0.324659	2.91948	0.00350617	0.0258624
ENSGALG00000027579_MRPS6	426.811	0.986401	0.337992	2.91842	0.00351816	0.0259096
ENSGALG00000036838	21.859	2.49624	0.855328	2.91846	0.00351763	0.0259096
ENSGALG00000038733_TRAK1	1656.76	-0.888289	0.304343	-2.91871	0.00351484	0.0259096
ENSGALG00000001525	1517.02	-0.781288	0.268024	-2.91499	0.00355703	0.0261544
ENSGALG00000003948_ALAS1	999.455	-0.802851	0.275413	-2.91508	0.00355597	0.0261544
ENSGALG00000031590_B3GAT2	29.955	2.76669	0.949125	2.91499	0.00355699	0.0261544
ENSGALG00000035629_GRAMD1C	422.932	-0.892409	0.306237	-2.91411	0.003567	0.0262139
ENSGALG00000009725_SCG5	132.243	1.38832	0.476955	2.91079	0.00360512	0.0264801
ENSGALG00000006690_ECHDC3	206.195	1.07882	0.370701	2.91022	0.00361177	0.0265149
ENSGALG00000000811_IST1	860.256	-0.814818	0.280087	-2.90916	0.003624	0.0265907
ENSGALG00000043576_AGAP3	108.299	1.27701	0.439051	2.90857	0.00363089	0.0266271
ENSGALG00000011442_TGFBR2	796.417	0.869959	0.299233	2.9073	0.00364568	0.0267216
ENSGALG00000016805_SULT1C3	5520.68	-0.967537	0.333045	-2.90512	0.00367109	0.0268936
ENSGALG00000010575_INTS12	226.354	-0.988955	0.340471	-2.90467	0.00367641	0.0269043
ENSGALG00000013112_RERGL	457.826	0.97519	0.335722	2.90476	0.00367539	0.0269043
ENSGALG00000003837_ADCY7	599.748	-0.842121	0.289986	-2.90401	0.00368417	0.0269186
ENSGALG00000040098_EEF1D	4049.49	0.759108	0.261394	2.90407	0.00368346	0.0269186
ENSGALG00000045960	10.2038	3.70508	1.27573	2.90429	0.00368089	0.0269186
ENSGALG00000011688_TCP11L1	270.426	0.988801	0.340533	2.90369	0.00368792	0.0269304
ENSGALG00000052538	38.1058	-1.86841	0.643491	-2.90354	0.00368965	0.0269304
ENSGALG00000015795_ADAMTS5	92.5347	1.60519	0.55292	2.90311	0.00369479	0.0269537
ENSGALG00000001892_CYGB	114.213	1.25882	0.433758	2.90213	0.0037064	0.0270243
ENSGALG00000019114_CLDN10	1107.67	-0.930526	0.320866	-2.90005	0.00373108	0.0271758
ENSGALG00000054686_PFN2	2332	-0.772756	0.266461	-2.90007	0.00373084	0.0271758
ENSGALG00000001753_SFMBT1	96.4408	1.34778	0.464987	2.89853	0.00374919	0.0272792
ENSGALG00000009272	286.256	-0.926017	0.319461	-2.89868	0.00374733	0.0272792
ENSGALG00000045607_CXCL13	10.0373	5.09112	1.75669	2.89813	0.00375398	0.0272997
ENSGALG00000015683_GNG10	144.186	1.21616	0.419742	2.8974	0.00376266	0.0273433
ENSGALG00000050548	553.066	-1.4767	0.509681	-2.8973	0.0037639	0.0273433
ENSGALG00000005843_EEF1A2	171.427	1.23515	0.426437	2.89643	0.00377434	0.0274048
ENSGALG00000031860	188.274	-1.00426	0.346903	-2.89493	0.00379244	0.0274932
ENSGALG00000038433_SPON2	230.606	0.996547	0.344202	2.89524	0.00378872	0.0274932
ENSGALG00000052148	13.5592	-2.96317	1.02354	-2.89503	0.00379123	0.0274932
ENSGALG00000004902_TOM1L2	976.419	-0.887432	0.306601	-2.89442	0.00379856	0.0275232
ENSGALG00000003126_ERBB4	10.5016	4.98463	1.72276	2.89339	0.00381102	0.0275848
ENSGALG00000010203	1413.87	-0.919793	0.317888	-2.89345	0.00381039	0.0275848
ENSGALG00000049219	24.8923	-2.11038	0.729546	-2.89273	0.00381911	0.027629
ENSGALG00000042750_ND1	18353.3	-0.740913	0.256231	-2.89158	0.00383315	0.0277162
ENSGALG00000033932_BF1	4774.19	-1.15774	0.40063	-2.88981	0.00385477	0.027858
ENSGALG00000006480_TCF7	174.317	1.25671	0.434983	2.88911	0.00386332	0.0278909
ENSGALG00000052273	19.8276	2.57621	0.891669	2.88919	0.00386231	0.0278909
ENSGALG00000009269_PTGR2	401.099	-0.991305	0.343328	-2.88734	0.00388515	0.0280339
ENSGALG00000009730_SLC38A4	193.043	1.60233	0.555004	2.88706	0.00388863	0.0280444
ENSGALG00000001569_RHOC	135.446	1.12682	0.390346	2.88672	0.00389277	0.0280598
ENSGALG00000009222_FNDC3B	660.678	0.87408	0.302919	2.88553	0.00390757	0.0281519
ENSGALG00000014686_FBN2	55.5449	1.66611	0.577547	2.8848	0.00391656	0.0281875
ENSGALG00000046794	57.7047	-1.43795	0.498454	-2.88483	0.00391631	0.0281875
ENSGALG00000041422	1741.02	-0.81755	0.283418	-2.8846	0.00391908	0.028191
ENSGALG00000000645	116.999	-1.48933	0.516456	-2.88375	0.00392965	0.0282524
ENSGALG00000011581_KIF26A	446.584	0.903593	0.31339	2.88328	0.00393551	0.0282742
ENSGALG00000026360_SOWAHC	87.3587	1.38663	0.480937	2.88319	0.00393673	0.0282742
ENSGALG00000002492_H6PD	783.002	-0.961558	0.333645	-2.88197	0.00395192	0.0283686
ENSGALG00000050615_CKAP2L	501.213	0.998273	0.346551	2.8806	0.00396921	0.0284781
ENSGALG00000000309	1364.85	-0.931695	0.323501	-2.88003	0.00397631	0.0285143
ENSGALG00000004442_PPA1	1068.4	-1.05085	0.364923	-2.87965	0.00398114	0.0285195
ENSGALG00000005888_PGP	207.254	-1.05535	0.366471	-2.87976	0.00397977	0.0285195
ENSGALG00000017153_RDX	1509.63	0.969354	0.336789	2.87822	0.00399921	0.0286195
ENSGALG00000027188_SREBF1	492.648	-1.16604	0.405122	-2.87824	0.00399897	0.0286195
ENSGALG00000008953_AASS	106.03	1.37508	0.477959	2.87698	0.00401506	0.0286887
ENSGALG00000011663_FNDC1	633.186	1.01987	0.354454	2.87729	0.00401108	0.0286887
ENSGALG00000028376_FGF19	1242.2	-4.89375	1.70092	-2.87711	0.00401335	0.0286887
ENSGALG00000003699_EBF1	102.761	1.43903	0.500373	2.87593	0.00402845	0.0287254
ENSGALG00000011514_SLC25A3	2154.14	-0.754376	0.262276	-2.87627	0.00402401	0.0287254
ENSGALG00000015024_RCL1	280.831	-0.982259	0.341536	-2.876	0.00402745	0.0287254
ENSGALG00000029680	329.659	-1.10097	0.3828	-2.87609	0.00402632	0.0287254
ENSGALG00000016721_PLCXD1	119.466	1.19788	0.416549	2.87571	0.00403119	0.0287302
ENSGALG00000000442_KCNA2	42.6163	1.70865	0.594256	2.87528	0.00403667	0.0287384
ENSGALG00000036288_OAZ2	644.69	0.878089	0.305408	2.87514	0.00403853	0.0287384
ENSGALG00000045212_PLCD3	96.1322	1.34782	0.468753	2.87534	0.00403598	0.0287384
ENSGALG00000034188_PAG1	119.163	1.16019	0.40373	2.87369	0.00405709	0.0288557
ENSGALG00000040444_SEMA3C	358.127	1.01237	0.352313	2.87349	0.00405965	0.0288592
ENSGALG00000046580_MGARP	68.7111	-1.42332	0.495376	-2.87322	0.00406311	0.028869
ENSGALG00000043823_ECSIT	106.205	-1.22685	0.427175	-2.87201	0.00407866	0.0289647
ENSGALG00000014447_AK3	767.796	-0.946144	0.329517	-2.87131	0.00408777	0.0290146
ENSGALG00000003445_MGST3	142.548	-1.08185	0.376854	-2.87075	0.00409506	0.0290515
ENSGALG00000040320_HOXB8	21.2447	2.44774	0.852958	2.86971	0.0041085	0.029132
ENSGALG00000027093_TLR1B	107.486	1.21715	0.424224	2.86912	0.00411611	0.0291711
ENSGALG00000005298	91.5072	1.27549	0.444635	2.86863	0.00412255	0.0291898
ENSGALG00000041232_TMEM223	131.554	-1.16498	0.406116	-2.8686	0.00412294	0.0291898
ENSGALG00000032518_NCALD	164.643	1.05232	0.366884	2.86827	0.00412724	0.0292054
ENSGALG00000012917_CDH6	413.208	0.932914	0.325407	2.86691	0.004145	0.0293013
ENSGALG00000013738_OPTN	1689.1	-0.792552	0.276447	-2.86693	0.00414478	0.0293013
ENSGALG00000051224	5.93494	5.75298	2.00731	2.86602	0.00415671	0.0293692
ENSGALG00000033408_ZBTB7C	19.5431	2.66979	0.932093	2.86429	0.00417939	0.0295145
ENSGALG00000009369_PRDX3	402.401	-0.85503	0.298549	-2.86396	0.00418386	0.0295233
ENSGALG00000033143	125.654	-1.21916	0.425701	-2.86388	0.0041849	0.0295233
ENSGALG00000044780	572.671	-1.03272	0.36064	-2.86356	0.00418908	0.0295379
ENSGALG00000010224_GLIPR1L	205.156	1.18209	0.412895	2.86294	0.00419732	0.029581
ENSGALG00000004620_LAMC1	4338.61	0.751323	0.262474	2.86247	0.00420353	0.0296098
ENSGALG00000027658_TESK1	39.7143	1.79326	0.626534	2.86218	0.00420735	0.0296217
ENSGALG00000035645_GNAI2	895.206	0.788712	0.275592	2.86189	0.00421127	0.0296343
ENSGALG00000015020_TMEM171	95.0289	1.68927	0.590321	2.86162	0.00421486	0.0296446
ENSGALG00000008049_ARL3	67.2694	1.41742	0.495369	2.86134	0.00421857	0.0296557
ENSGALG00000005259_VIPR1	361.491	-1.08809	0.380318	-2.86101	0.00422294	0.0296714
ENSGALG00000017715_TINAGL1	197.866	1.11898	0.391227	2.86018	0.00423395	0.0297338
ENSGALG00000031244_ADCY6	588.279	0.965809	0.337773	2.85934	0.00424523	0.029798
ENSGALG00000047233	82.0192	-1.54138	0.539104	-2.85915	0.00424773	0.0298004
ENSGALG00000047566	313.599	-0.900108	0.314846	-2.85889	0.00425131	0.0298106
ENSGALG00000004612_MTHFR	389.738	-0.969198	0.339355	-2.856	0.00429018	0.030068
ENSGALG00000014695_CLCN1	12.1813	-3.10168	1.08626	-2.85536	0.00429882	0.0301134
ENSGALG00000041380_BF2	11972.2	-1.26015	0.441615	-2.8535	0.00432411	0.0302753
ENSGALG00000031216_FLOT2	1190.81	0.779498	0.273214	2.85306	0.00433001	0.0303014
ENSGALG00000031303_FAM234A	578.82	-0.841601	0.295186	-2.85108	0.00435708	0.0304602
ENSGALG00000049288	121.13	-1.11848	0.392292	-2.85115	0.0043562	0.0304602
ENSGALG00000036492_DAGLA	97.3788	1.23376	0.432988	2.84941	0.00438001	0.0306051
ENSGALG00000040238_IMP3	58.5219	-1.47738	0.518583	-2.84887	0.00438746	0.0306418
ENSGALG00000012888_PHLPP1	991.7	-0.840503	0.29512	-2.848	0.00439945	0.0307101
ENSGALG00000047320_MFAP5	264.29	1.55534	0.546383	2.8466	0.00441882	0.0308299
ENSGALG00000005079_VCL	2296.37	0.770177	0.270613	2.84604	0.0044266	0.0308687
ENSGALG00000002216_NEK7	745.625	0.99118	0.348328	2.84554	0.00443367	0.0309025
[truncated: 309 more rows]

## Sheet: Ileum vs Proximal Cecum - DESeq
Supplemental Table 6
Sheet 3: Ileum vs Proximal Cecum DESeq2 Results
gene_name	baseMean	log2FoldChange	lfcSE	stat	pvalue	padj
ENSGALG00000036956	422404	-10.9596	0.32949	-33.2622	1.36e-242	2.01e-238
ENSGALG00000037838_ND6	7244.29	-7.34495	0.279456	-26.283	3e-152	2.22e-148
ENSGALG00000043598	653637	-7.45885	0.297546	-25.0679	1.11e-138	5.5e-135
ENSGALG00000043329	1939.21	-6.34248	0.285333	-22.2283	1.83e-109	6.76e-106
ENSGALG00000021931_SNORA73	2467.42	6.69729	0.309791	21.6188	1.2e-103	3.54e-100
ENSGALG00000036229_ND4	11877.7	-5.21905	0.243594	-21.4252	7.78e-102	1.92e-98
ENSGALG00000042750_ND1	11104.1	-5.20088	0.248889	-20.8964	5.77e-97	1.22e-93
ENSGALG00000043768_MT-ND2	9297.32	-4.93849	0.254103	-19.435	3.9e-84	7.21e-81
ENSGALG00000013916_HYPK	953.612	-4.88388	0.283212	-17.2446	1.23e-66	2.02e-63
ENSGALG00000029500_ND5	15110	-4.35018	0.260709	-16.6859	1.66e-62	2.45e-59
ENSGALG00000025695_SCARNA13	1667.81	6.20518	0.374113	16.5864	8.74e-62	1.18e-58
ENSGALG00000045581	872.237	-5.10028	0.309454	-16.4815	4.98e-61	6.14e-58
ENSGALG00000035086	35417.7	-3.67647	0.227729	-16.144	1.25e-58	1.42e-55
ENSGALG00000004186_NSRP1	724.157	-4.69339	0.303461	-15.4662	5.86e-54	5.78e-51
ENSGALG00000032079_CYTB	13909.9	-3.61428	0.23363	-15.4702	5.52e-54	5.78e-51
ENSGALG00000025557_RNase_MRP	160197	5.64157	0.368365	15.3152	6.06e-53	5.6e-50
ENSGALG00000048200_MRPL33	1246.92	-4.14749	0.272149	-15.2398	1.92e-52	1.67e-49
ENSGALG00000037805_RPS19	13783.1	-4.24331	0.285158	-14.8805	4.41e-50	3.62e-47
ENSGALG00000000377_HNRNPM	2747.7	-3.51218	0.240751	-14.5884	3.33e-48	2.59e-45
ENSGALG00000025650_RNaseP_nuc	191613	4.69104	0.324149	14.4719	1.82e-47	1.35e-44
ENSGALG00000002563_TPM4	548.093	-5.14975	0.361455	-14.2473	4.66e-46	3.28e-43
ENSGALG00000051169	1036.4	-3.82715	0.28329	-13.5097	1.37e-41	9.22e-39
ENSGALG00000041030_PCBP2	1330.74	-4.34595	0.321938	-13.4994	1.58e-41	1.01e-38
ENSGALG00000006843_NCBP2	1129.02	-3.72395	0.278296	-13.3813	7.78e-41	4.8e-38
ENSGALG00000047103_UTP3	703.489	-4.41846	0.330348	-13.3752	8.44e-41	4.99e-38
ENSGALG00000041926_HEXIM1	3009.67	-3.53348	0.264895	-13.3392	1.37e-40	7.79e-38
ENSGALG00000001948	1619.06	-3.54813	0.267606	-13.2588	4.01e-40	2.2e-37
ENSGALG00000039334	648.491	-4.16369	0.314984	-13.2187	6.84e-40	3.61e-37
ENSGALG00000047578_SELENOP1	4355.54	4.23913	0.321415	13.189	1.02e-39	5.18e-37
ENSGALG00000045246_GOLIM4	2859.12	-3.5678	0.273678	-13.0365	7.59e-39	3.74e-36
ENSGALG00000028721_LMOD1	4125.54	-3.89578	0.299106	-13.0247	8.85e-39	4.22e-36
ENSGALG00000034725	2333.1	-4.1929	0.322135	-13.016	9.93e-39	4.59e-36
ENSGALG00000008618_UPF3B	1055.26	-3.40618	0.262856	-12.9584	2.11e-38	9.44e-36
ENSGALG00000032142_MT-CO1	64203.1	-3.06981	0.238905	-12.8495	8.66e-38	3.77e-35
ENSGALG00000008149_EWSR1	610.765	-3.82793	0.298144	-12.8392	9.89e-38	4.18e-35
ENSGALG00000030002_KRT18	1546.18	-3.40551	0.266466	-12.7803	2.11e-37	8.68e-35
ENSGALG00000014971_SLC2A9	583.256	-4.87855	0.385028	-12.6706	8.6e-37	3.44e-34
ENSGALG00000003947_HNRNPH3	3492.2	-3.07061	0.243827	-12.5934	2.3e-36	8.93e-34
ENSGALG00000041091_ATP6	8628.32	-3.33491	0.267071	-12.487	8.79e-36	3.33e-33
ENSGALG00000024391_CACTIN	1269.08	-3.13677	0.256758	-12.2168	2.53e-34	9.34e-32
ENSGALG00000048365_GPATCH4	324.268	-4.17062	0.343469	-12.1426	6.28e-34	2.26e-31
ENSGALG00000028451_MT4	807.257	4.49105	0.371121	12.1013	1.04e-33	3.66e-31
ENSGALG00000050749	288.976	6.05914	0.50593	11.9762	4.73e-33	1.63e-30
ENSGALG00000032456_COII	12015.3	-2.74356	0.236211	-11.6149	3.46e-31	1.16e-28
ENSGALG00000011036_HNRNPA2B1	9388.7	-3.15741	0.27307	-11.5626	6.37e-31	2.09e-28
ENSGALG00000012466_FKBP3	1805.81	-2.98842	0.258772	-11.5484	7.52e-31	2.42e-28
ENSGALG00000049582	501.722	-4.21063	0.365003	-11.5359	8.7e-31	2.74e-28
ENSGALG00000025653_SCARNA10	8585.24	3.20047	0.278345	11.4982	1.35e-30	4.15e-28
ENSGALG00000039974_AKAP8L	792.883	-3.4004	0.296301	-11.4762	1.74e-30	5.25e-28
ENSGALG00000033471_CALD1	12235.7	-3.34204	0.293375	-11.3917	4.6e-30	1.36e-27
ENSGALG00000039682_HCLS1	1547.58	-3.48873	0.30694	-11.3662	6.16e-30	1.79e-27
ENSGALG00000047241_Metazoa_SRP	149654	16.1786	1.42949	11.3177	1.07e-29	3.05e-27
ENSGALG00000011184_HNRNPD	1203.75	-3.10687	0.28004	-11.0944	1.34e-28	3.73e-26
ENSGALG00000050459_DUSP23	347.228	-3.79093	0.342383	-11.0722	1.71e-28	4.69e-26
ENSGALG00000004372_MICU1	661.81	-3.35104	0.303621	-11.0369	2.54e-28	6.82e-26
ENSGALG00000020164_GAR1	173.651	-5.84314	0.530154	-11.0216	3.01e-28	7.94e-26
ENSGALG00000009839_PPIG	1578.11	-3.35107	0.310826	-10.7812	4.23e-27	1.1e-24
ENSGALG00000031813_CASC3	811.863	-2.92563	0.271673	-10.7689	4.83e-27	1.23e-24
ENSGALG00000052199	229.65	-6.13573	0.571381	-10.7384	6.72e-27	1.68e-24
ENSGALG00000037595_USF1	353.586	-3.5165	0.328073	-10.7187	8.32e-27	2.05e-24
ENSGALG00000000542_ZNF593	1460.73	3.27341	0.305669	10.709	9.24e-27	2.22e-24
ENSGALG00000032249_MAX	338.504	-3.28827	0.307074	-10.7084	9.3e-27	2.22e-24
ENSGALG00000032499_ANAPC15	255.414	-3.84084	0.361749	-10.6174	2.47e-26	5.8e-24
ENSGALG00000003862_LRRFIP1	2076.92	-2.62028	0.247088	-10.6046	2.84e-26	6.55e-24
ENSGALG00000049270	280.157	-4.19797	0.396338	-10.5919	3.25e-26	7.39e-24
ENSGALG00000004236_TRAF3IP1	443.258	-3.10097	0.293953	-10.5492	5.12e-26	1.15e-23
ENSGALG00000016491_APOB	22789.3	2.46818	0.235552	10.4783	1.09e-25	2.4e-23
ENSGALG00000047833_MED11	173.342	-4.23247	0.404209	-10.471	1.17e-25	2.55e-23
ENSGALG00000007386_LUC7L3	2591.88	-2.57288	0.247333	-10.4025	2.41e-25	5.18e-23
ENSGALG00000035334_COX3	29909.1	-2.32366	0.224348	-10.3574	3.87e-25	8.18e-23
ENSGALG00000032847_HDGF	1915.66	-2.56479	0.249626	-10.2745	9.18e-25	1.91e-22
ENSGALG00000047486	898.909	-2.79595	0.272244	-10.27	9.62e-25	1.98e-22
ENSGALG00000043662_NDRG4	585.999	-3.08616	0.30168	-10.2299	1.46e-24	2.95e-22
ENSGALG00000002581	894.835	-3.0755	0.301227	-10.2099	1.79e-24	3.58e-22
ENSGALG00000034671_WDR74	243.222	-3.79352	0.372468	-10.1848	2.32e-24	4.57e-22
ENSGALG00000003878_PIN4	1261.82	-3.31807	0.326328	-10.1679	2.76e-24	5.37e-22
ENSGALG00000041592_SMARCC2	1385.38	-3.40033	0.335316	-10.1407	3.65e-24	7e-22
ENSGALG00000001258_NUMA1	3875.19	-2.81341	0.278822	-10.0903	6.1e-24	1.16e-21
ENSGALG00000032220_ELN	507.408	-3.11222	0.309077	-10.0694	7.54e-24	1.41e-21
ENSGALG00000047273_DRAP1	135.852	-5.58807	0.55659	-10.0398	1.02e-23	1.88e-21
ENSGALG00000047569	240.59	-5.12874	0.516893	-9.92223	3.33e-23	6.08e-21
ENSGALG00000050897_TNIK	1184.63	-2.53541	0.256752	-9.87494	5.35e-23	9.64e-21
ENSGALG00000037733	1217.74	-2.83146	0.289301	-9.78726	1.28e-22	2.28e-20
ENSGALG00000008349_LMCD1	394.57	-2.94318	0.301483	-9.76234	1.63e-22	2.88e-20
ENSGALG00000028295_MFAP1	772.699	-2.58542	0.265008	-9.75601	1.74e-22	3.02e-20
ENSGALG00000007914_DNAJC1	552.089	-2.97422	0.305812	-9.72563	2.34e-22	4.03e-20
ENSGALG00000002095_CHMP4B	2739.88	-2.39675	0.246897	-9.70746	2.8e-22	4.76e-20
ENSGALG00000011633_SLC5A8	272.866	-3.81265	0.39525	-9.64619	5.1e-22	8.57e-20
ENSGALG00000010209_PGRMC2	342.808	-2.97218	0.309031	-9.61774	6.73e-22	1.12e-19
ENSGALG00000017819_SNORA71	167.969	-5.83465	0.607106	-9.6106	7.21e-22	1.19e-19
ENSGALG00000035619_MTTP	3432.52	2.73162	0.28483	9.59036	8.78e-22	1.43e-19
ENSGALG00000008945_NEXN	935.538	-2.9748	0.310321	-9.5862	9.14e-22	1.47e-19
ENSGALG00000054991	1538.15	-2.72714	0.284777	-9.5764	1e-21	1.6e-19
ENSGALG00000047453	172.06	-6.65973	0.696472	-9.56209	1.15e-21	1.82e-19
ENSGALG00000049538_RPS28	3065.34	3.50534	0.366831	9.55575	1.23e-21	1.91e-19
ENSGALG00000035923_MTMR11	865.076	2.88226	0.302144	9.53937	1.44e-21	2.21e-19
ENSGALG00000002060_TAF15	986.009	-2.45386	0.258107	-9.50712	1.96e-21	2.99e-19
ENSGALG00000052643_C15orf48	1599.21	2.40887	0.253555	9.50038	2.09e-21	3.16e-19
ENSGALG00000005338_RPS21	422.185	3.7466	0.395503	9.47299	2.72e-21	4.06e-19
ENSGALG00000000137_SNRPE	335.612	-3.27608	0.346074	-9.46643	2.9e-21	4.28e-19
ENSGALG00000004152_C9orf78	607.964	-2.63271	0.279629	-9.415	4.73e-21	6.93e-19
ENSGALG00000011921_DHRS7	3440.36	-2.66796	0.283467	-9.41189	4.87e-21	7.06e-19
ENSGALG00000049751	1456.91	2.35007	0.24982	9.40707	5.1e-21	7.32e-19
ENSGALG00000032997_EMILIN2	986.013	-2.37933	0.253664	-9.37984	6.61e-21	9.39e-19
ENSGALG00000047929_SLC44A2	860.827	-3.3781	0.360398	-9.37325	7.03e-21	9.91e-19
ENSGALG00000001054_C20H20ORF24	2228.34	-2.37967	0.254297	-9.35782	8.14e-21	1.14e-18
ENSGALG00000017145_MPHOSPH8	487.014	-2.73171	0.291959	-9.35649	8.24e-21	1.14e-18
ENSGALG00000031120_HNRNPH2	9016.51	-2.20627	0.235996	-9.34879	8.87e-21	1.21e-18
ENSGALG00000016984_ZC3H13	3901.02	-2.48202	0.266154	-9.32549	1.1e-20	1.5e-18
ENSGALG00000035049	184.053	-3.42503	0.368118	-9.30416	1.35e-20	1.82e-18
ENSGALG00000049505	356.818	-2.90367	0.312179	-9.3013	1.39e-20	1.85e-18
ENSGALG00000032930_NCL	6706.48	-2.40732	0.259428	-9.27933	1.71e-20	2.24e-18
ENSGALG00000037619_HOXB6	119.493	-4.73578	0.510368	-9.27914	1.71e-20	2.24e-18
ENSGALG00000046712_LMNA	909.854	-2.50711	0.270974	-9.25222	2.2e-20	2.85e-18
ENSGALG00000003741_MYO18A	3405.07	-2.59806	0.281583	-9.22661	2.79e-20	3.59e-18
ENSGALG00000010167_PNN	1585.73	-2.54051	0.275681	-9.21541	3.1e-20	3.95e-18
ENSGALG00000048775_TXLNA	1432.85	-2.50217	0.271783	-9.20651	3.37e-20	4.26e-18
ENSGALG00000042875_HMGB1	3370.28	-2.19662	0.238911	-9.19428	3.78e-20	4.73e-18
ENSGALG00000030351_ILF3	1371.4	-2.45883	0.267654	-9.18661	4.05e-20	5.04e-18
ENSGALG00000013365	2115.71	-2.23696	0.243756	-9.17704	4.43e-20	5.46e-18
ENSGALG00000002197_NPM1	11581.9	-2.16216	0.236406	-9.14595	5.91e-20	7.22e-18
ENSGALG00000015822	431.923	3.38728	0.37078	9.13557	6.51e-20	7.89e-18
ENSGALG00000009270_HOXD10	104.431	-4.74108	0.522994	-9.06526	1.24e-19	1.49e-17
ENSGALG00000011902_TAGLN	26229.3	-2.53496	0.280618	-9.03351	1.66e-19	1.98e-17
ENSGALG00000049711	372.499	-4.04632	0.448017	-9.03163	1.69e-19	2e-17
ENSGALG00000048273	247.581	-3.14615	0.348582	-9.02558	1.79e-19	2.1e-17
ENSGALG00000001972	1302.21	-2.27811	0.252824	-9.01067	2.05e-19	2.38e-17
ENSGALG00000006861_COQ7	429.894	-2.57306	0.285718	-9.00558	2.15e-19	2.48e-17
ENSGALG00000052930	458.959	-3.09779	0.34428	-8.99787	2.3e-19	2.64e-17
ENSGALG00000001803_IWS1	1645.55	-2.25583	0.251406	-8.97285	2.89e-19	3.29e-17
ENSGALG00000006117_UBFD1	499.399	-2.75475	0.307236	-8.96622	3.07e-19	3.46e-17
ENSGALG00000028409_SNRPGP15	159.515	-4.55377	0.508248	-8.95973	3.25e-19	3.65e-17
ENSGALG00000038413_SURF6	280.806	-3.27393	0.365557	-8.95601	3.37e-19	3.74e-17
ENSGALG00000051276_GATAD2B	702.786	-2.84601	0.319235	-8.9151	4.87e-19	5.38e-17
ENSGALG00000031238_SLIRP	409.12	-2.72776	0.306312	-8.90514	5.33e-19	5.84e-17
ENSGALG00000031487_FSTL4	222.76	-3.09007	0.34722	-8.89945	5.61e-19	6.1e-17
ENSGALG00000035362	141.036	-3.65414	0.410838	-8.89437	5.88e-19	6.34e-17
ENSGALG00000049136	391.455	-2.87398	0.323988	-8.87065	7.27e-19	7.79e-17
ENSGALG00000048788	1939.63	3.01182	0.342015	8.80611	1.3e-18	1.38e-16
ENSGALG00000042116_FUT9	2197	2.37897	0.270256	8.80267	1.34e-18	1.41e-16
ENSGALG00000032307_DDX23	1279.86	-2.43891	0.27723	-8.79742	1.4e-18	1.47e-16
ENSGALG00000014381_HNRNPAB	3772.61	-2.04863	0.233448	-8.77554	1.7e-18	1.77e-16
ENSGALG00000013771_KIAA1211	2420.13	-2.43802	0.277971	-8.77075	1.77e-18	1.84e-16
ENSGALG00000011356	236.954	-3.47478	0.397118	-8.75	2.13e-18	2.19e-16
ENSGALG00000007878_SDHD	1375.07	2.28626	0.261858	8.73091	2.53e-18	2.58e-16
ENSGALG00000013191_NDUFS6	350.053	-3.15601	0.361579	-8.7284	2.58e-18	2.62e-16
ENSGALG00000012710_NCS1	1069.38	-2.60436	0.298789	-8.71639	2.87e-18	2.89e-16
ENSGALG00000023256_RNF8	313.316	-2.6947	0.309251	-8.71364	2.94e-18	2.94e-16
ENSGALG00000007237_ALYREF	750.427	-2.54191	0.291761	-8.71232	2.98e-18	2.95e-16
ENSGALG00000013037_BCL2L13	731.818	-2.33766	0.269176	-8.6845	3.8e-18	3.75e-16
ENSGALG00000014589	963.356	-2.59827	0.299849	-8.66528	4.5e-18	4.41e-16
ENSGALG00000042478_ND4L	396.691	-2.67245	0.309303	-8.64022	5.61e-18	5.46e-16
ENSGALG00000000920_CGN	3465.9	-2.08007	0.240783	-8.63878	5.68e-18	5.49e-16
ENSGALG00000002832_IFI35	919.908	-2.49045	0.288546	-8.63103	6.08e-18	5.8e-16
ENSGALG00000027068_HDGFRP2	1106.91	-2.2359	0.259031	-8.63175	6.04e-18	5.8e-16
ENSGALG00000031571_H2A-VI	1435.19	2.14357	0.249224	8.60098	7.9e-18	7.49e-16
ENSGALG00000010124_RPS8	17165.5	-2.13336	0.248663	-8.57931	9.54e-18	8.99e-16
ENSGALG00000034168_WNT5A	471.656	-2.52927	0.295989	-8.54515	1.28e-17	1.2e-15
ENSGALG00000038582_SLC36A1	723.953	-2.40616	0.281701	-8.54152	1.32e-17	1.23e-15
ENSGALG00000033926_CBX1	607.024	-2.46848	0.289895	-8.51507	1.66e-17	1.54e-15
ENSGALG00000006895_CEP131	539.344	-2.65641	0.312045	-8.51289	1.7e-17	1.56e-15
ENSGALG00000042011_HNRNPA1	4760.41	-2.22834	0.261842	-8.51025	1.74e-17	1.58e-15
ENSGALG00000006253_ILKAP	418.006	-2.44454	0.287394	-8.50587	1.8e-17	1.64e-15
ENSGALG00000002010_SNIP1	364.297	-2.51262	0.295786	-8.49471	1.98e-17	1.79e-15
ENSGALG00000040716_PRLH	116.176	-4.27263	0.504212	-8.47387	2.37e-17	2.13e-15
ENSGALG00000002853_CFDP1	501.509	-2.50314	0.295454	-8.47218	2.41e-17	2.15e-15
ENSGALG00000032730_NOP56	626.366	-2.35471	0.278055	-8.46851	2.49e-17	2.2e-15
ENSGALG00000008675_SLC25A5	660.792	-2.33402	0.276172	-8.45133	2.88e-17	2.53e-15
ENSGALG00000016586_CCDC25	711.313	-2.20343	0.260846	-8.44725	2.98e-17	2.61e-15
ENSGALG00000052612_RPS27L	2183.64	2.58037	0.305507	8.44618	3.01e-17	2.62e-15
ENSGALG00000028810_CHCHD10	873.944	-2.31965	0.274669	-8.44528	3.03e-17	2.62e-15
ENSGALG00000010127_GLO1	2939.45	2.31856	0.274891	8.43449	3.33e-17	2.86e-15
ENSGALG00000006160_HNRNPA0	524.455	-2.49915	0.296345	-8.43325	3.36e-17	2.87e-15
ENSGALG00000029276_PPP1R9B	741.19	-2.54232	0.303523	-8.37605	5.47e-17	4.65e-15
ENSGALG00000030028_MRPS14	170.866	-3.18112	0.3813	-8.34283	7.25e-17	6.13e-15
ENSGALG00000013809	1759.7	-2.00926	0.240881	-8.3413	7.35e-17	6.17e-15
ENSGALG00000012876_SSBP1	676.685	-2.19174	0.263794	-8.30851	9.69e-17	8.1e-15
ENSGALG00000001328_BSG	6403.82	-2.01976	0.24452	-8.26011	1.46e-16	1.21e-14
ENSGALG00000041114_GOLGA4	3583.93	-1.92108	0.232663	-8.25694	1.49e-16	1.23e-14
ENSGALG00000002802_PACSIN1	351.093	-2.63176	0.319107	-8.24727	1.62e-16	1.33e-14
ENSGALG00000030988_RBPMS2	1000.94	-2.55708	0.310129	-8.24522	1.65e-16	1.35e-14
ENSGALG00000009615_RRP15	322.67	-2.57521	0.312542	-8.23955	1.73e-16	1.4e-14
ENSGALG00000037441	1805.74	2.3567	0.286093	8.23753	1.76e-16	1.42e-14
ENSGALG00000029624_DHRS4	921.037	-2.45131	0.298532	-8.21122	2.19e-16	1.76e-14
ENSGALG00000041790_SAMD4A	631.438	-2.6935	0.328812	-8.1916	2.58e-16	2.06e-14
ENSGALG00000000329_AHCYL1	1624.88	-2.00062	0.244411	-8.18547	2.71e-16	2.16e-14
ENSGALG00000005507_NONO	2434.3	-2.09985	0.256611	-8.18303	2.77e-16	2.19e-14
ENSGALG00000053867	235.472	-2.74659	0.335771	-8.17994	2.84e-16	2.23e-14
ENSGALG00000036283_RBM8A	237.76	-3.41518	0.41755	-8.1791	2.86e-16	2.24e-14
ENSGALG00000001542_MRPL20	323.771	-2.5637	0.313499	-8.17769	2.89e-16	2.25e-14
ENSGALG00000054294	163.433	-3.11103	0.380691	-8.17207	3.03e-16	2.35e-14
ENSGALG00000000538_RNF113B	291.188	-2.69812	0.330452	-8.16495	3.22e-16	2.48e-14
ENSGALG00000032546_MYEF2	804.637	-2.16014	0.26497	-8.15239	3.57e-16	2.73e-14
ENSGALG00000028872_TPT1	13620.9	-1.83393	0.224978	-8.15158	3.59e-16	2.74e-14
ENSGALG00000042739_TACC1	693.331	-2.23101	0.273747	-8.1499	3.64e-16	2.76e-14
ENSGALG00000000814_HNRNPR	3880.56	-1.8641	0.22967	-8.11642	4.8e-16	3.62e-14
ENSGALG00000004881	1721.97	-2.10495	0.25946	-8.11279	4.95e-16	3.71e-14
ENSGALG00000019527_SLC6A19	12112.4	2.09943	0.25925	8.09807	5.58e-16	4.17e-14
ENSGALG00000009250_HNRNPA3	7430.28	-2.24399	0.277493	-8.08669	6.13e-16	4.52e-14
ENSGALG00000032577_MECOM	867.057	-2.77501	0.343126	-8.08741	6.09e-16	4.52e-14
ENSGALG00000041914_BRI3	544.217	2.51852	0.311452	8.08638	6.15e-16	4.52e-14
ENSGALG00000040368_CALR	9386.17	-1.88742	0.233461	-8.08452	6.24e-16	4.57e-14
ENSGALG00000006583_LSP1P1	4078.22	-2.07889	0.259324	-8.0166	1.09e-15	7.92e-14
ENSGALG00000013993_VNN1	845.324	2.21929	0.277229	8.00527	1.19e-15	8.64e-14
ENSGALG00000012121	353.661	-2.62096	0.327893	-7.99335	1.31e-15	9.45e-14
ENSGALG00000052842_ANKRD11	5944.09	-2.26336	0.283166	-7.99305	1.32e-15	9.45e-14
ENSGALG00000006332_RBM17	595.243	-2.24244	0.281221	-7.97393	1.54e-15	1.1e-13
ENSGALG00000006113_ZNF326	1065.15	-2.02555	0.254119	-7.97087	1.58e-15	1.11e-13
ENSGALG00000010158_KANK1	1895	-1.98608	0.249158	-7.97117	1.57e-15	1.11e-13
ENSGALG00000054005_PPP1R37	602.193	-2.27766	0.285798	-7.96946	1.59e-15	1.12e-13
ENSGALG00000012857_DENND2A	541.247	-2.21874	0.278482	-7.96726	1.62e-15	1.14e-13
ENSGALG00000039001_FILIP1	2086.95	-2.22514	0.27945	-7.96259	1.68e-15	1.18e-13
ENSGALG00000016764_EIF5B	2995.52	-1.97791	0.248763	-7.95095	1.85e-15	1.28e-13
ENSGALG00000010427_TM4SF4	1050.66	2.61428	0.328981	7.94658	1.92e-15	1.32e-13
ENSGALG00000026490_RPS16	5515.13	1.96248	0.247519	7.9286	2.22e-15	1.52e-13
ENSGALG00000026558_ZNF362	169.102	-3.21351	0.405502	-7.92477	2.29e-15	1.56e-13
ENSGALG00000010743_LRRC42	357.67	-2.46539	0.311195	-7.92233	2.33e-15	1.59e-13
ENSGALG00000051266	902.644	-2.7837	0.35221	-7.90351	2.71e-15	1.84e-13
ENSGALG00000025819_UQCRFS1	1468.43	2.05969	0.260735	7.89954	2.8e-15	1.89e-13
ENSGALG00000048930_CDC37	1082.24	-2.37446	0.30108	-7.88647	3.11e-15	2.09e-13
ENSGALG00000012137_KTN1	5246.16	-1.82487	0.23179	-7.87294	3.46e-15	2.32e-13
ENSGALG00000016513_PPM1G	622.46	-2.21608	0.282608	-7.84154	4.45e-15	2.95e-13
ENSGALG00000036359_RUVBL2	442.04	-2.28192	0.290996	-7.84177	4.44e-15	2.95e-13
ENSGALG00000041423	847.828	-2.01449	0.256977	-7.8392	4.53e-15	2.99e-13
ENSGALG00000010792_AGMO	510.999	2.33439	0.298666	7.81605	5.45e-15	3.58e-13
ENSGALG00000002661_YWHAE	3473.63	-1.86372	0.238774	-7.80536	5.93e-15	3.88e-13
ENSGALG00000037525_FGFRL1	434.667	-2.36702	0.303544	-7.79796	6.29e-15	4.1e-13
ENSGALG00000036552_PDAP1	410.054	-2.5621	0.328658	-7.79563	6.41e-15	4.16e-13
ENSGALG00000037633_WIPF2	103.173	-3.73556	0.47989	-7.7842	7.02e-15	4.53e-13
ENSGALG00000026151_CEP250	769.61	-2.28077	0.293088	-7.78185	7.15e-15	4.59e-13
ENSGALG00000007047_GAL	375.971	2.57789	0.331623	7.77356	7.63e-15	4.88e-13
ENSGALG00000024480_TIMMDC1	984.976	-1.94966	0.251574	-7.74984	9.2e-15	5.86e-13
ENSGALG00000021158_SLC7A9	7104.62	2.24455	0.290197	7.73458	1.04e-14	6.58e-13
ENSGALG00000008249_DNAJC2	908.005	-2.02832	0.262725	-7.72031	1.16e-14	7.33e-13
ENSGALG00000039803_LSM12	146.023	-3.17713	0.412251	-7.70679	1.29e-14	8.12e-13
ENSGALG00000048074	65.89	-5.42623	0.70433	-7.7041	1.32e-14	8.26e-13
ENSGALG00000033170_GMDS	683.046	-2.2755	0.295423	-7.70252	1.33e-14	8.32e-13
ENSGALG00000015044_GTF3C6	128.081	-3.24679	0.421764	-7.69812	1.38e-14	8.58e-13
ENSGALG00000007882	304.403	-2.39271	0.311163	-7.68956	1.48e-14	9.03e-13
ENSGALG00000029897_RPL30	3736.38	2.01124	0.261517	7.69066	1.46e-14	9.03e-13
ENSGALG00000054713	253.812	-2.71245	0.352753	-7.68938	1.48e-14	9.03e-13
ENSGALG00000054889	291.306	-2.81423	0.365947	-7.69025	1.47e-14	9.03e-13
ENSGALG00000004869_ISCU	1428.02	-1.90692	0.248176	-7.68374	1.55e-14	9.4e-13
ENSGALG00000003941_FUBP3	1317.8	-2.2232	0.289405	-7.68194	1.57e-14	9.5e-13
ENSGALG00000015548_RNF20	2362.71	-2.34425	0.307681	-7.61907	2.56e-14	1.54e-12
ENSGALG00000001382_CDC2L1	1234.3	-2.09774	0.275727	-7.60804	2.78e-14	1.67e-12
ENSGALG00000031058	126.121	-3.30624	0.434788	-7.60425	2.87e-14	1.72e-12
ENSGALG00000041471_TUBB	1755.36	-2.76193	0.363746	-7.593	3.13e-14	1.86e-12
ENSGALG00000001022_CCDC43	339.427	-2.31709	0.306067	-7.57054	3.72e-14	2.19e-12
ENSGALG00000005487_CCDC12	612.172	-2.17043	0.286661	-7.57141	3.69e-14	2.19e-12
ENSGALG00000005934	189.054	-3.3232	0.438966	-7.57052	3.72e-14	2.19e-12
ENSGALG00000037172_IK	1289.71	-2.02764	0.26823	-7.55935	4.05e-14	2.38e-12
ENSGALG00000034187_SEPTIN8	459.165	-2.41327	0.319366	-7.55643	4.14e-14	2.42e-12
ENSGALG00000004588_RPS14	3988.24	1.87784	0.248576	7.55438	4.21e-14	2.45e-12
ENSGALG00000012697_SLC41A2	587.021	2.10761	0.279172	7.5495	4.37e-14	2.53e-12
ENSGALG00000016731_MRPL19	537.551	-2.09966	0.278196	-7.54742	4.44e-14	2.56e-12
ENSGALG00000009493_TMEM229B	709.762	2.00987	0.266727	7.53531	4.87e-14	2.8e-12
ENSGALG00000048565_PRKCSH	300.997	-2.46929	0.328463	-7.5177	5.57e-14	3.2e-12
ENSGALG00000011608	342.003	-2.66154	0.355182	-7.49344	6.71e-14	3.83e-12
ENSGALG00000038589_ABHD14B	1423.4	2.71804	0.363209	7.48341	7.24e-14	4.12e-12
ENSGALG00000019555_SERPINB1	711.241	2.08014	0.278139	7.47879	7.5e-14	4.25e-12
ENSGALG00000026055_PALM	276.628	-2.55403	0.3417	-7.47449	7.75e-14	4.37e-12
ENSGALG00000028174_CAVIN2	4687.91	-2.46805	0.330632	-7.46464	8.35e-14	4.7e-12
ENSGALG00000008054	1620.58	-1.84896	0.247854	-7.45986	8.66e-14	4.85e-12
ENSGALG00000004386_SOX9	90.3914	-3.56863	0.478674	-7.45524	8.97e-14	5.01e-12
ENSGALG00000013352_SF3B4	384.576	-2.52083	0.339127	-7.43329	1.06e-13	5.89e-12
ENSGALG00000000544	411.141	-2.2828	0.307224	-7.43042	1.08e-13	6e-12
ENSGALG00000008550_MRPS5	516.742	-2.0792	0.279985	-7.42611	1.12e-13	6.17e-12
ENSGALG00000006118_ZC3H18	300.553	-2.46423	0.333078	-7.39836	1.38e-13	7.58e-12
ENSGALG00000025842_TPM2	66445.5	-1.71904	0.232369	-7.39787	1.38e-13	7.58e-12
ENSGALG00000048013_HTD2	152.743	-2.79057	0.377438	-7.39346	1.43e-13	7.81e-12
ENSGALG00000035842_SLC37A2	241.55	-2.43487	0.329433	-7.3911	1.46e-13	7.92e-12
ENSGALG00000049138_TAF6	151.406	-3.07152	0.415753	-7.38785	1.49e-13	8.08e-12
ENSGALG00000016485_RHOB	1152.11	-1.90754	0.25824	-7.38668	1.51e-13	8.09e-12
ENSGALG00000027332_TMEM167A	633.045	2.11663	0.286529	7.38715	1.5e-13	8.09e-12
ENSGALG00000047034	284.407	2.5619	0.34714	7.38001	1.58e-13	8.48e-12
ENSGALG00000014963	1259.52	-1.90625	0.258785	-7.36615	1.76e-13	9.38e-12
ENSGALG00000049119_ZNF638	1273.93	-1.99846	0.271336	-7.36524	1.77e-13	9.41e-12
ENSGALG00000050400	340.482	-2.23231	0.303131	-7.36417	1.78e-13	9.45e-12
ENSGALG00000004192_SLTM	412.718	-2.20091	0.298952	-7.3621	1.81e-13	9.56e-12
ENSGALG00000010109_RNF220	412.332	-2.10043	0.285414	-7.35925	1.85e-13	9.73e-12
ENSGALG00000016003_DDRGK1	541.926	-1.98738	0.270185	-7.35564	1.9e-13	9.96e-12
ENSGALG00000014648_CETN3	471.379	-2.13789	0.290768	-7.35258	1.94e-13	1.02e-11
ENSGALG00000047827_TMEM86A	361.976	2.25515	0.30749	7.33406	2.23e-13	1.16e-11
ENSGALG00000031723_BANF1	112.499	-3.63152	0.496663	-7.31185	2.63e-13	1.36e-11
ENSGALG00000036677_ITSN1	1737.75	-1.88112	0.257259	-7.31218	2.63e-13	1.36e-11
ENSGALG00000016415_MAP7D2	526.453	-2.13791	0.292519	-7.30863	2.7e-13	1.39e-11
ENSGALG00000013639_SYF2	686.296	-2.11924	0.290518	-7.29468	2.99e-13	1.54e-11
ENSGALG00000033572_SORT1	644.088	-2.25285	0.308994	-7.29091	3.08e-13	1.58e-11
ENSGALG00000011738_ARHGDIB	826.834	-1.88491	0.258983	-7.2781	3.39e-13	1.73e-11
ENSGALG00000015830_SYNCRIP	1986.05	-1.82525	0.251404	-7.26023	3.86e-13	1.96e-11
ENSGALG00000015751_ATP5PF	790.666	2.28091	0.314692	7.24807	4.23e-13	2.14e-11
ENSGALG00000032642_SMARCC1	1472.72	-2.26522	0.312801	-7.24174	4.43e-13	2.24e-11
ENSGALG00000040348_EHBP1	4106.38	-2.2541	0.311476	-7.23682	4.59e-13	2.31e-11
ENSGALG00000038399_PLEKHA6	1103.93	-2.06889	0.28594	-7.2354	4.64e-13	2.33e-11
ENSGALG00000033781_FEN1	300.518	-2.50943	0.346984	-7.23213	4.75e-13	2.38e-11
ENSGALG00000009312_RPL22L1	720.322	2.2705	0.314105	7.22848	4.88e-13	2.43e-11
ENSGALG00000020262_NKAPL	583.692	-2.19336	0.303486	-7.22722	4.93e-13	2.44e-11
ENSGALG00000048034	1734.14	-1.80162	0.249281	-7.22728	4.93e-13	2.44e-11
ENSGALG00000016844_RAB20	208.285	-2.46929	0.341726	-7.22593	4.98e-13	2.45e-11
ENSGALG00000027269_GUCA2B	86104.1	1.7565	0.243389	7.21683	5.32e-13	2.61e-11
ENSGALG00000039629_HOXD11	63.6965	-6.38224	0.884993	-7.21162	5.53e-13	2.71e-11
ENSGALG00000017042_UFM1	851.821	1.9396	0.269248	7.20377	5.86e-13	2.85e-11
ENSGALG00000030569_TRIM41	336.508	-2.29833	0.319037	-7.20395	5.85e-13	2.85e-11
ENSGALG00000042148_FKBP5	823.923	-2.7563	0.383462	-7.18794	6.58e-13	3.19e-11
ENSGALG00000041432_STUB1	669.794	-2.14656	0.298989	-7.17939	7e-13	3.38e-11
ENSGALG00000011475_RPL37A	3393.17	2.03149	0.283294	7.17096	7.45e-13	3.59e-11
ENSGALG00000042976_UBTF	2544.02	-1.79705	0.25073	-7.16727	7.65e-13	3.67e-11
ENSGALG00000021634_MAP7D1	112.797	-3.6907	0.51511	-7.16488	7.79e-13	3.73e-11
ENSGALG00000051654_YLPM1	1974.91	-2.02732	0.282973	-7.16435	7.82e-13	3.73e-11
ENSGALG00000042129	781.328	-2.21664	0.309482	-7.16243	7.93e-13	3.77e-11
ENSGALG00000009328_EIF3A	6238.62	-1.90144	0.265817	-7.15316	8.48e-13	4.02e-11
ENSGALG00000012988_B4GALNT3	136.456	-3.25832	0.455821	-7.14824	8.79e-13	4.15e-11
ENSGALG00000002466_SLC2A5	851.759	2.17698	0.304569	7.14774	8.82e-13	4.15e-11
ENSGALG00000000603_KANSL1	1074.33	-2.04434	0.286031	-7.14729	8.85e-13	4.15e-11
ENSGALG00000006530_TSSC4	434.603	-2.07642	0.290564	-7.14615	8.92e-13	4.18e-11
ENSGALG00000007130_RAC1	603.829	-2.05651	0.287813	-7.1453	8.98e-13	4.18e-11
ENSGALG00000051260	1498.06	-1.72721	0.241731	-7.14517	8.99e-13	4.18e-11
ENSGALG00000049063_INAFM2	77.7523	5.0208	0.702812	7.14387	9.07e-13	4.21e-11
ENSGALG00000001206	192.02	3.17012	0.44439	7.13363	9.78e-13	4.52e-11
ENSGALG00000051187_CCDC130	113.006	-3.00675	0.421525	-7.13302	9.82e-13	4.52e-11
ENSGALG00000011490_CMTM6	287.025	2.39774	0.336316	7.12943	1.01e-12	4.63e-11
ENSGALG00000030857_USP48	1490.7	-2.05921	0.288897	-7.12784	1.02e-12	4.67e-11
ENSGALG00000032465_ATP8	93.5426	-5.96355	0.836928	-7.12552	1.04e-12	4.73e-11
ENSGALG00000001183_MYH10	5166.02	-1.87741	0.263736	-7.1185	1.09e-12	4.96e-11
ENSGALG00000049360_PPP1R10	580.194	-2.46144	0.345869	-7.11667	1.11e-12	5.02e-11
ENSGALG00000019976	246.998	-2.30759	0.324281	-7.11604	1.11e-12	5.02e-11
ENSGALG00000000707_PSMD7	1577.49	-1.86973	0.262931	-7.11111	1.15e-12	5.19e-11
ENSGALG00000013768_PHACTR2	1191.9	-1.76785	0.248643	-7.10999	1.16e-12	5.22e-11
ENSGALG00000033129_ZFP36L2	776.963	-2.11103	0.297178	-7.10357	1.22e-12	5.45e-11
ENSGALG00000002624_BMS1	1091.13	-1.82203	0.256906	-7.09219	1.32e-12	5.9e-11
ENSGALG00000009379_SEC62	2716.97	-1.69697	0.240162	-7.06593	1.6e-12	7.11e-11
ENSGALG00000014372_SLC34A2	1524.15	-1.98764	0.281684	-7.05627	1.71e-12	7.59e-11
ENSGALG00000047139	281.618	-2.30846	0.327353	-7.05191	1.76e-12	7.81e-11
ENSGALG00000043736	311.404	-2.71802	0.385956	-7.04231	1.89e-12	8.35e-11
ENSGALG00000007791_OTOP2	355.017	-2.85019	0.405181	-7.03437	2e-12	8.78e-11
ENSGALG00000039872_PDLIM4	880.655	-1.82703	0.259728	-7.03441	2e-12	8.78e-11
ENSGALG00000035960	269.427	-2.73472	0.389117	-7.02802	2.09e-12	9.16e-11
ENSGALG00000039160_SUPT5H	1282.35	-1.95362	0.278011	-7.02712	2.11e-12	9.2e-11
ENSGALG00000008520_EIF4G1	2632.54	-2.00951	0.286054	-7.02494	2.14e-12	9.31e-11
ENSGALG00000000883_MAPKAPK2	975.883	-2.64678	0.376971	-7.02119	2.2e-12	9.54e-11
ENSGALG00000014616_MT3	126.719	3.06421	0.437549	7.00314	2.5e-12	1.08e-10
ENSGALG00000053053_AQP8	360.806	-8.61023	1.23171	-6.99046	2.74e-12	1.18e-10
ENSGALG00000032858_RSL24D1	619.164	-1.89276	0.270804	-6.98942	2.76e-12	1.19e-10
ENSGALG00000002426_EXOSC3	182.156	-2.60983	0.373632	-6.98502	2.85e-12	1.22e-10
ENSGALG00000017862_SNORA23	70.0855	4.37963	0.629016	6.96266	3.34e-12	1.43e-10
ENSGALG00000002457_SIL1	293.658	-2.12306	0.305403	-6.95166	3.61e-12	1.54e-10
ENSGALG00000048829	260.417	-2.29115	0.330031	-6.94224	3.86e-12	1.64e-10
ENSGALG00000034955_DCTN2	903.731	-2.01034	0.289722	-6.93887	3.95e-12	1.67e-10
ENSGALG00000047145_SMARCA4	813.871	-2.42379	0.349556	-6.93392	4.09e-12	1.73e-10
ENSGALG00000005420_AATF	311.666	-2.28006	0.328897	-6.93245	4.14e-12	1.74e-10
ENSGALG00000032526_B3GNT5	654.668	2.1962	0.316931	6.92959	4.22e-12	1.77e-10
ENSGALG00000006393	815.262	1.84862	0.266989	6.92395	4.39e-12	1.84e-10
ENSGALG00000012119_MARCO	1819.36	-1.70453	0.246318	-6.92005	4.51e-12	1.89e-10
ENSGALG00000026978_RPL29	4003.88	2.30908	0.334111	6.91112	4.81e-12	2e-10
ENSGALG00000049148	85.4074	-3.62576	0.52525	-6.90292	5.09e-12	2.12e-10
ENSGALG00000000946_PFDN1	463.106	-2.35655	0.341507	-6.90046	5.18e-12	2.15e-10
ENSGALG00000002467_MTSS2	516.142	-3.00765	0.436457	-6.89105	5.54e-12	2.29e-10
ENSGALG00000004529_VPS29	557.79	1.91286	0.277752	6.88695	5.7e-12	2.34e-10
ENSGALG00000026471_CRIP2	224.168	-2.45957	0.357135	-6.88696	5.7e-12	2.34e-10
ENSGALG00000040699	404.529	2.12227	0.308308	6.8836	5.84e-12	2.39e-10
ENSGALG00000040021_HOXA11	242.023	-2.30564	0.335072	-6.88103	5.94e-12	2.43e-10
ENSGALG00000030775_HIGD1C	792.827	-1.90283	0.276705	-6.87673	6.12e-12	2.49e-10
ENSGALG00000047359_MAF1	1676.78	-1.80174	0.262021	-6.87631	6.14e-12	2.5e-10
ENSGALG00000039891_ANP32E	7769.27	-1.79679	0.261339	-6.87535	6.18e-12	2.51e-10
ENSGALG00000013041_CCT5	2339.46	-1.61346	0.234794	-6.87183	6.34e-12	2.56e-10
ENSGALG00000001309_SNF8	347.354	-2.10668	0.30684	-6.86574	6.61e-12	2.67e-10
ENSGALG00000037138_KCNQ1	489.516	-2.24336	0.327372	-6.85265	7.25e-12	2.91e-10
ENSGALG00000015483_PNISR	1753.65	-1.66017	0.242383	-6.84939	7.42e-12	2.97e-10
ENSGALG00000043735	249.764	2.38237	0.348298	6.84004	7.92e-12	3.16e-10
ENSGALG00000012833_VPS33B	700.165	-1.83396	0.268218	-6.83757	8.06e-12	3.21e-10
ENSGALG00000040371	920.366	1.95088	0.285828	6.82536	8.77e-12	3.48e-10
ENSGALG00000041857_ZC3H15	2136.3	-1.64058	0.240362	-6.82545	8.77e-12	3.48e-10
ENSGALG00000036790_RPS27A	4708.83	1.62572	0.238249	6.82361	8.88e-12	3.51e-10
ENSGALG00000001569_RHOC	173.494	-2.4477	0.358959	-6.81888	9.18e-12	3.62e-10
ENSGALG00000037851_KK34	167.668	-2.51913	0.369488	-6.81789	9.24e-12	3.63e-10
ENSGALG00000052799	101.783	-3.26363	0.47876	-6.81683	9.31e-12	3.65e-10
ENSGALG00000006910_IMPDH2	930.671	-1.86737	0.273968	-6.81599	9.36e-12	3.66e-10
ENSGALG00000010820_CHGA	5606.99	-1.95187	0.286995	-6.80106	1.04e-11	4.05e-10
ENSGALG00000032002_RPL34	6206.43	1.78567	0.262662	6.79838	1.06e-11	4.12e-10
ENSGALG00000050314_SRSF4	341.702	-2.03839	0.300199	-6.79013	1.12e-11	4.35e-10
ENSGALG00000002595_GPX4	1020.84	-1.80611	0.26601	-6.78963	1.12e-11	4.35e-10
ENSGALG00000026903_CALB2	62.4313	-4.1331	0.608902	-6.78779	1.14e-11	4.4e-10
ENSGALG00000044985	1856.9	-1.89549	0.279294	-6.78673	1.15e-11	4.42e-10
ENSGALG00000049348	173.39	-2.74114	0.404161	-6.78231	1.18e-11	4.54e-10
ENSGALG00000032783_SUMO3	1676.44	-1.6466	0.242825	-6.78101	1.19e-11	4.57e-10
ENSGALG00000035080_HARS	714.096	-1.96658	0.29008	-6.77942	1.21e-11	4.61e-10
ENSGALG00000004545_WDR72	159.037	-3.43623	0.507064	-6.77672	1.23e-11	4.69e-10
ENSGALG00000047730	90.3227	-10.3409	1.52864	-6.76476	1.34e-11	5.08e-10
ENSGALG00000013535_CYP4V2	1554.31	1.71032	0.252925	6.76217	1.36e-11	5.15e-10
ENSGALG00000008187_EIF3J	2094.38	-1.62912	0.240957	-6.76103	1.37e-11	5.18e-10
ENSGALG00000030587	1987.24	-1.96062	0.290342	-6.7528	1.45e-11	5.47e-10
ENSGALG00000045115	125.11	-2.75614	0.408372	-6.74909	1.49e-11	5.6e-10
ENSGALG00000001252_CREB3L3	1280.63	1.80546	0.268337	6.72833	1.72e-11	6.44e-10
ENSGALG00000001950_PMPCA	421.435	-2.10228	0.312624	-6.72462	1.76e-11	6.59e-10
ENSGALG00000037867_MRPL53	220.578	2.35211	0.349885	6.72252	1.79e-11	6.67e-10
ENSGALG00000000533_SRSF3	1270.67	-2.18	0.324323	-6.7217	1.8e-11	6.67e-10
ENSGALG00000001521_VPS26B	629.84	-1.92334	0.286135	-6.72179	1.8e-11	6.67e-10
ENSGALG00000051412_PEA15	105.132	-3.12593	0.465997	-6.70804	1.97e-11	7.31e-10
ENSGALG00000027416_ROMO1	362.003	-2.4081	0.359203	-6.70402	2.03e-11	7.5e-10
ENSGALG00000009286_ATP5G3	702.938	2.44129	0.364676	6.69441	2.17e-11	7.99e-10
ENSGALG00000022991_SMIM20	377.359	2.17199	0.324833	6.6865	2.29e-11	8.41e-10
ENSGALG00000050145_FIS1	110.696	-3.69226	0.552678	-6.68068	2.38e-11	8.73e-10
ENSGALG00000004222_HK1	1634.14	-1.78616	0.267436	-6.67884	2.41e-11	8.82e-10
ENSGALG00000030899_ATXN7L3	357.844	-2.03004	0.30415	-6.67448	2.48e-11	9.06e-10
ENSGALG00000014730_ELOVL7	953.544	1.76393	0.264306	6.67381	2.49e-11	9.08e-10
ENSGALG00000025800	725.516	-2.10261	0.315113	-6.67256	2.51e-11	9.13e-10
ENSGALG00000036240_AKAP12	2700.23	-1.64794	0.247033	-6.6709	2.54e-11	9.21e-10
ENSGALG00000017336	567.2	-1.84396	0.276531	-6.66821	2.59e-11	9.36e-10
ENSGALG00000039967_RP11-529K1.3	1611.23	-1.84799	0.277155	-6.66773	2.6e-11	9.37e-10
ENSGALG00000006018	138.804	2.72836	0.409385	6.66453	2.66e-11	9.54e-10
ENSGALG00000032993_FTSJ3	608.625	-2.29367	0.344165	-6.66443	2.66e-11	9.54e-10
ENSGALG00000012456_RAC2	638.379	-2.41231	0.362371	-6.657	2.79e-11	1e-09
ENSGALG00000031896_GSE1	233.043	-2.30047	0.346238	-6.64418	3.05e-11	1.09e-09
ENSGALG00000003693_MACF1	11122	-2.064	0.310935	-6.63806	3.18e-11	1.13e-09
ENSGALG00000023689_ASS1	682.273	-1.7831	0.269402	-6.61874	3.62e-11	1.29e-09
ENSGALG00000037879_PAF1	540.05	-2.06859	0.312707	-6.61508	3.71e-11	1.32e-09
ENSGALG00000000474_RPL36	1361.23	1.7976	0.272728	6.59117	4.36e-11	1.54e-09
ENSGALG00000006751_THY1	265.776	-2.51861	0.382204	-6.58969	4.41e-11	1.56e-09
ENSGALG00000024094_UBAP2L	1116.1	-2.13267	0.323905	-6.58425	4.57e-11	1.61e-09
ENSGALG00000012952_BASP1	2055.77	-1.83473	0.279042	-6.57509	4.86e-11	1.71e-09
ENSGALG00000043605_BEST4	436.935	-2.56449	0.390044	-6.57488	4.87e-11	1.71e-09
ENSGALG00000039525	146.794	-2.68481	0.408915	-6.56569	5.18e-11	1.81e-09
ENSGALG00000027562_PURG	235.246	-2.78733	0.424797	-6.56156	5.32e-11	1.86e-09
ENSGALG00000052286_MGAT1	293.766	-2.33889	0.35682	-6.55482	5.57e-11	1.94e-09
ENSGALG00000003348	218.618	2.56262	0.392127	6.53519	6.35e-11	2.21e-09
ENSGALG00000031663_SEC11C	270.43	-2.18138	0.334053	-6.53003	6.58e-11	2.28e-09
ENSGALG00000003304_CRTC1	245.434	-2.23537	0.342463	-6.52732	6.7e-11	2.31e-09
ENSGALG00000043764_KCNS2	111.71	-3.1319	0.48114	-6.50933	7.55e-11	2.6e-09
ENSGALG00000045788_PSMB6	473.153	2.43914	0.374721	6.50922	7.55e-11	2.6e-09
ENSGALG00000026215	69.523	-3.58193	0.5505	-6.50668	7.68e-11	2.64e-09
ENSGALG00000047410	133.616	-2.57047	0.395121	-6.50554	7.74e-11	2.65e-09
ENSGALG00000008120_TLE3	633.934	-1.9636	0.301989	-6.50222	7.91e-11	2.7e-09
ENSGALG00000046950	154.549	-2.66419	0.409724	-6.50239	7.91e-11	2.7e-09
ENSGALG00000035626_DAD1	424.305	-1.8488	0.286424	-6.45475	1.08e-10	3.68e-09
ENSGALG00000011705_BRF1	351.167	-1.97353	0.305808	-6.4535	1.09e-10	3.71e-09
ENSGALG00000006013_ZNF512B	661.52	-1.82363	0.282859	-6.44713	1.14e-10	3.86e-09
ENSGALG00000039869_PYURF	59.5121	-3.78874	0.589403	-6.4281	1.29e-10	4.36e-09
ENSGALG00000031450_MYO7A	194.113	-2.91679	0.454073	-6.42362	1.33e-10	4.48e-09
ENSGALG00000037483_ANP32B	846.391	-1.68515	0.262388	-6.42235	1.34e-10	4.51e-09
ENSGALG00000035946_GUCY1A1	499.776	1.80772	0.281965	6.41115	1.44e-10	4.84e-09
ENSGALG00000033647	156.293	-2.38723	0.372414	-6.41015	1.45e-10	4.86e-09
ENSGALG00000012265_MICALL1	675.92	-2.3303	0.364339	-6.39596	1.6e-10	5.33e-09
ENSGALG00000011937_NFE2L1	2783.44	-1.67132	0.261595	-6.38894	1.67e-10	5.55e-09
ENSGALG00000031824_HOOK2	344.471	-2.32798	0.36437	-6.38906	1.67e-10	5.55e-09
ENSGALG00000041013_TNS1	6237.07	-2.08847	0.327475	-6.37749	1.8e-10	5.97e-09
ENSGALG00000002232_RERE	893.422	-2.10398	0.330084	-6.37406	1.84e-10	6.09e-09
ENSGALG00000006564	1045.26	-1.63714	0.257201	-6.36522	1.95e-10	6.44e-09
ENSGALG00000016447_PDIA6	3022.34	-1.57117	0.247204	-6.35576	2.07e-10	6.83e-09
ENSGALG00000036856_CBX5	83.8023	-3.23328	0.508824	-6.35441	2.09e-10	6.88e-09
ENSGALG00000051598	3190.41	1.68732	0.265573	6.35351	2.1e-10	6.9e-09
ENSGALG00000029617_COL17A1	255.134	2.33745	0.368198	6.34836	2.18e-10	7.12e-09
ENSGALG00000052051_COPS9	108.356	-3.37959	0.533757	-6.3317	2.42e-10	7.91e-09
ENSGALG00000050207_EMP2	206.994	2.23077	0.352346	6.33121	2.43e-10	7.92e-09
ENSGALG00000015339_RPL24	3015.03	1.6017	0.253001	6.33081	2.44e-10	7.93e-09
ENSGALG00000008516_CPO	997.527	1.86233	0.294398	6.32591	2.52e-10	8.16e-09
ENSGALG00000017384_ERH	911.595	-1.61188	0.254826	-6.32544	2.53e-10	8.17e-09
ENSGALG00000003120_NCOR2	2941.05	-1.72631	0.272976	-6.32402	2.55e-10	8.23e-09
ENSGALG00000027771_CACNG1	97.4016	-2.77707	0.439151	-6.32374	2.55e-10	8.23e-09
ENSGALG00000008352_CKMT1B	1776.61	-1.63254	0.258341	-6.31931	2.63e-10	8.45e-09
ENSGALG00000001101_MBD3	215.699	-2.1524	0.340866	-6.31451	2.71e-10	8.69e-09
ENSGALG00000001021_MYOCD	527.043	-1.89665	0.300406	-6.31364	2.73e-10	8.71e-09
ENSGALG00000014913_ROS1	3203.93	1.56934	0.248565	6.31362	2.73e-10	8.71e-09
ENSGALG00000044330	1303.07	1.7185	0.272268	6.3118	2.76e-10	8.79e-09
ENSGALG00000019719_KRT24	60.0218	-3.54183	0.562494	-6.29665	3.04e-10	9.67e-09
ENSGALG00000008096_SUFU	595.049	-2.11574	0.336089	-6.29519	3.07e-10	9.74e-09
ENSGALG00000005884	617.373	-1.76203	0.280591	-6.27972	3.39e-10	1.07e-08
ENSGALG00000015937_FABP1	3795.22	1.88648	0.300394	6.28	3.39e-10	1.07e-08
ENSGALG00000035156_DCTN1	2749.85	-1.691	0.269337	-6.27839	3.42e-10	1.08e-08
ENSGALG00000038730_GIGYF2	2029.13	-1.62264	0.258988	-6.26529	3.72e-10	1.17e-08
ENSGALG00000003505_LACTB	459.755	-1.75964	0.281085	-6.26018	3.85e-10	1.2e-08
ENSGALG00000006294_PSMD2	1619.26	-1.71639	0.274166	-6.26039	3.84e-10	1.2e-08
ENSGALG00000001624_CWC25	306.313	-1.90383	0.30439	-6.25456	3.99e-10	1.25e-08
ENSGALG00000049356	525.387	2.07393	0.331659	6.2532	4.02e-10	1.25e-08
ENSGALG00000021679_SF3A2	271.059	-2.01355	0.322276	-6.24791	4.16e-10	1.29e-08
ENSGALG00000046795_Metazoa_SRP	264889	7.06836	1.13191	6.24462	4.25e-10	1.32e-08
ENSGALG00000032644	224.598	-2.38024	0.381296	-6.24251	4.31e-10	1.33e-08
ENSGALG00000014874_MRPS30	435.556	1.8436	0.295396	6.24112	4.34e-10	1.34e-08
ENSGALG00000047060	124.18	-2.49662	0.400049	-6.24079	4.35e-10	1.34e-08
ENSGALG00000000560	294.323	-2.86774	0.459611	-6.23949	4.39e-10	1.35e-08
ENSGALG00000000156_BRD2	2280.31	-1.67096	0.267869	-6.23797	4.43e-10	1.36e-08
ENSGALG00000003906_MPHOSPH10	475.685	-1.72563	0.276728	-6.23585	4.49e-10	1.38e-08
ENSGALG00000044592	176.597	2.42952	0.389947	6.23038	4.65e-10	1.42e-08
ENSGALG00000054882_PREB	377.812	1.95202	0.313344	6.22963	4.68e-10	1.43e-08
ENSGALG00000011457_CCNI	6499.6	-1.65912	0.266464	-6.22643	4.77e-10	1.45e-08
ENSGALG00000008454_NOP58	900.41	-1.63067	0.26191	-6.22607	4.78e-10	1.46e-08
ENSGALG00000053999_VPS37D	136.582	3.05856	0.491391	6.2243	4.84e-10	1.47e-08
ENSGALG00000036282_PRKAG1	383.752	-1.92302	0.308976	-6.22384	4.85e-10	1.47e-08
ENSGALG00000039528_PLCE1	616.357	-1.84758	0.297193	-6.21676	5.08e-10	1.53e-08
ENSGALG00000003261_PTRF	6518.96	-1.68919	0.271969	-6.21095	5.27e-10	1.59e-08
ENSGALG00000046811_STIP1	626.11	-2.14072	0.344657	-6.21117	5.26e-10	1.59e-08
ENSGALG00000040335_CEBPZ	888.924	-1.71492	0.276446	-6.20345	5.52e-10	1.66e-08
ENSGALG00000043379_RPL14	3586.14	1.69821	0.273758	6.20331	5.53e-10	1.66e-08
ENSGALG00000007668_BMP7	317.686	-2.29363	0.369768	-6.20288	5.54e-10	1.66e-08
ENSGALG00000040741_DNM2	1968.56	-1.81791	0.293196	-6.20033	5.63e-10	1.68e-08
ENSGALG00000006462_PPP2CA	1294.5	-1.55234	0.250499	-6.19699	5.76e-10	1.72e-08
ENSGALG00000012113_C7H2ORF76	179.079	2.39107	0.386679	6.18361	6.27e-10	1.86e-08
ENSGALG00000048097	54.596	-9.47575	1.53324	-6.1802	6.4e-10	1.9e-08
ENSGALG00000046740	95.9771	-2.96602	0.480207	-6.17654	6.55e-10	1.94e-08
ENSGALG00000010243_PRDX1	6129.48	1.71797	0.278189	6.17554	6.59e-10	1.95e-08
ENSGALG00000033530	1600.52	1.62305	0.262887	6.17394	6.66e-10	1.97e-08
ENSGALG00000053144_U3	2019.98	8.15124	1.32062	6.17227	6.73e-10	1.98e-08
ENSGALG00000052268_SSBP4	223.086	-2.12118	0.343766	-6.17042	6.81e-10	2e-08
ENSGALG00000016810_SH3RF3	270.936	-2.2284	0.361268	-6.16829	6.9e-10	2.03e-08
ENSGALG00000006480_TCF7	223.419	-2.53208	0.410727	-6.16489	7.05e-10	2.07e-08
ENSGALG00000042723_SCARNA7	993.76	-2.08144	0.338113	-6.15606	7.46e-10	2.18e-08
ENSGALG00000021238	413.234	-1.88818	0.306814	-6.15416	7.55e-10	2.2e-08
ENSGALG00000033001_ATP5J2	613.938	2.11265	0.3437	6.14679	7.91e-10	2.3e-08
ENSGALG00000008443_ARHGDIA	2904.99	-1.4904	0.242539	-6.145	8e-10	2.32e-08
ENSGALG00000030237_PITX1	110.095	-2.61448	0.425528	-6.14407	8.04e-10	2.33e-08
ENSGALG00000017681_POLR3K	146.624	-2.60522	0.42423	-6.14105	8.2e-10	2.37e-08
ENSGALG00000030280_PABPC1	16525.5	-1.73577	0.282727	-6.1394	8.28e-10	2.39e-08
ENSGALG00000049072	104.303	-2.60224	0.424592	-6.1288	8.85e-10	2.55e-08
ENSGALG00000004034_CAPZB	1679.79	-1.46702	0.239455	-6.1265	8.98e-10	2.58e-08
ENSGALG00000002906_TARDBP	1524.61	-1.82837	0.29851	-6.12498	9.07e-10	2.6e-08
ENSGALG00000027655_TRABD2B	129.121	-2.43141	0.397094	-6.12301	9.18e-10	2.63e-08
ENSGALG00000033561_DGKB	186.093	-2.35385	0.384629	-6.11979	9.37e-10	2.68e-08
ENSGALG00000037983_LUC7L	771.359	-1.59684	0.261008	-6.11799	9.48e-10	2.71e-08
ENSGALG00000004798_MPRIP	1108.45	-1.91494	0.313391	-6.11036	9.94e-10	2.83e-08
ENSGALG00000043606	158.583	-2.34073	0.38348	-6.10392	1.03e-09	2.94e-08
ENSGALG00000007383_HSPB8	235.108	-1.97158	0.323187	-6.10041	1.06e-09	3e-08
ENSGALG00000030890_RRS1	308.098	2.5131	0.41222	6.09652	1.08e-09	3.07e-08
ENSGALG00000047167_DNAJC30	69.8624	3.78702	0.62138	6.09452	1.1e-09	3.1e-08
ENSGALG00000008852_DNAJC19	615.09	-1.90955	0.314647	-6.06886	1.29e-09	3.64e-08
ENSGALG00000004509	27851.5	1.55795	0.256818	6.06637	1.31e-09	3.68e-08
ENSGALG00000026973_KIF3C	111.842	-2.562	0.422334	-6.06629	1.31e-09	3.68e-08
ENSGALG00000012709_ATXN1	387.165	-1.94551	0.32104	-6.06002	1.36e-09	3.82e-08
ENSGALG00000013604_VIP	170.319	2.31824	0.38303	6.05238	1.43e-09	4e-08
ENSGALG00000005739_SCD	597.398	-2.63803	0.4359	-6.05191	1.43e-09	4e-08
ENSGALG00000010255_NASP	454.157	-1.75317	0.289769	-6.05021	1.45e-09	4.03e-08
ENSGALG00000046169_PYM1	214.89	-2.29803	0.379821	-6.0503	1.45e-09	4.03e-08
ENSGALG00000001475_STMN1	665.392	1.60881	0.266362	6.03995	1.54e-09	4.28e-08
ENSGALG00000053342	122.427	2.82319	0.467991	6.03258	1.61e-09	4.48e-08
ENSGALG00000003318_SNRNP35	121.628	-2.80738	0.465408	-6.03208	1.62e-09	4.48e-08
ENSGALG00000036837_PTGES3	927.713	-1.85716	0.307997	-6.02982	1.64e-09	4.53e-08
ENSGALG00000038109_MRPL45	461.005	-1.6987	0.281706	-6.03005	1.64e-09	4.53e-08
ENSGALG00000045705	219.403	-1.99081	0.330307	-6.02713	1.67e-09	4.59e-08
ENSGALG00000050857_PTPN20	282.096	1.96771	0.326472	6.0272	1.67e-09	4.59e-08
ENSGALG00000000579_VAMP3	552.299	-1.67611	0.278236	-6.02405	1.7e-09	4.67e-08
ENSGALG00000039791_DOLPP1	425.18	-1.75554	0.291463	-6.02321	1.71e-09	4.68e-08
ENSGALG00000000866_SELENBP1	2905.73	-2.17306	0.360852	-6.02204	1.72e-09	4.71e-08
ENSGALG00000002615_DEF6	590.613	-1.64675	0.273678	-6.01713	1.78e-09	4.84e-08
ENSGALG00000026944_ARF6	829.608	-1.64576	0.273514	-6.01711	1.78e-09	4.84e-08
ENSGALG00000008883_TCF7L2	483.834	-1.90276	0.31674	-6.00732	1.89e-09	5.13e-08
ENSGALG00000026293_C3orf33	77.2393	-3.26548	0.544176	-6.00079	1.96e-09	5.33e-08
ENSGALG00000019358_LLPH	237.775	-2.19101	0.365181	-5.9998	1.98e-09	5.35e-08
ENSGALG00000006521_TRPM5	515.753	1.79628	0.299549	5.99661	2.01e-09	5.45e-08
ENSGALG00000028600_PPIA	7417.23	-1.40161	0.233761	-5.99589	2.02e-09	5.46e-08
ENSGALG00000041200_ZNF706	2514.74	1.47741	0.246562	5.99206	2.07e-09	5.58e-08
ENSGALG00000016001_LZTS3	482.997	-1.77795	0.296886	-5.98866	2.12e-09	5.69e-08
ENSGALG00000012410	269.941	-1.93627	0.323353	-5.9881	2.12e-09	5.7e-08
ENSGALG00000033498	1395.86	-1.64748	0.275346	-5.9833	2.19e-09	5.86e-08
ENSGALG00000030614_ADH1C	3518.46	-2.3071	0.385825	-5.97964	2.24e-09	5.98e-08
ENSGALG00000027908_CYP2U1	888.648	1.56018	0.260938	5.97912	2.24e-09	5.99e-08
ENSGALG00000037043_PIK3C2B	313.027	-1.97779	0.330811	-5.97862	2.25e-09	6e-08
ENSGALG00000020322	331.286	1.82309	0.305038	5.97661	2.28e-09	6.06e-08
ENSGALG00000004496_TNIP1	5210.3	-1.39625	0.233808	-5.97177	2.35e-09	6.23e-08
ENSGALG00000000719_RPL22	6806.44	-1.74398	0.292598	-5.96032	2.52e-09	6.67e-08
ENSGALG00000036085	379.63	-2.05025	0.344085	-5.95857	2.54e-09	6.73e-08
ENSGALG00000053262_HIST2H4B	603.145	-1.94552	0.327222	-5.94555	2.76e-09	7.28e-08
ENSGALG00000006404_DDX46	2152.75	-1.44978	0.243952	-5.9429	2.8e-09	7.38e-08
ENSGALG00000011555_QKI	827.524	-1.55859	0.26248	-5.93794	2.89e-09	7.59e-08
ENSGALG00000036785_TRIM8	1110.05	-1.89572	0.319297	-5.93717	2.9e-09	7.62e-08
ENSGALG00000016781_MAP4K4	1992.28	-1.56838	0.264197	-5.93643	2.91e-09	7.64e-08
ENSGALG00000048165	124.192	-2.72197	0.458657	-5.93464	2.94e-09	7.71e-08
ENSGALG00000017323_FAM168A	78.5152	-2.86319	0.483093	-5.92679	3.09e-09	8.07e-08
ENSGALG00000027925_HOXA3	239.983	-2.30597	0.389333	-5.92288	3.16e-09	8.25e-08
ENSGALG00000000881_GPATCH3	147.785	-2.22737	0.376733	-5.91233	3.37e-09	8.78e-08
ENSGALG00000036821_HSF1	212.301	-1.97258	0.333877	-5.90809	3.46e-09	8.98e-08
ENSGALG00000052284_H2A-VI	1183.95	1.49792	0.253527	5.90832	3.46e-09	8.98e-08
ENSGALG00000005796_XBP1	1547.56	1.56076	0.264394	5.90316	3.57e-09	9.23e-08
ENSGALG00000015016_SLC22A15	295.321	1.84547	0.312769	5.90043	3.63e-09	9.37e-08
ENSGALG00000015662	136.671	2.48187	0.420714	5.89917	3.65e-09	9.43e-08
ENSGALG00000001428_EFHD1	1419.61	-1.66617	0.282508	-5.89776	3.68e-09	9.49e-08
ENSGALG00000009844_ACTC1	272.646	-2.931	0.497114	-5.89603	3.72e-09	9.58e-08
ENSGALG00000034358	632.155	-1.9196	0.325679	-5.89416	3.77e-09	9.67e-08
ENSGALG00000036142_LOXL3	195.314	-2.18179	0.370187	-5.89374	3.78e-09	9.68e-08
ENSGALG00000028119_CDC42SE1	555.626	-1.64841	0.279875	-5.88981	3.87e-09	9.89e-08
ENSGALG00000010926_SPP1	53.7729	-4.50262	0.764988	-5.88587	3.96e-09	1.01e-07
ENSGALG00000028517_EIF1	1045.29	-1.77792	0.302499	-5.87743	4.17e-09	1.06e-07
ENSGALG00000011682_CNOT4	331.856	-1.83315	0.312694	-5.86245	4.56e-09	1.16e-07
ENSGALG00000015105_PSIP1	535.52	-1.73141	0.295353	-5.86216	4.57e-09	1.16e-07
ENSGALG00000003855_SRC	313.374	-2.28197	0.389416	-5.85999	4.63e-09	1.17e-07
ENSGALG00000006001_PRPF6	2129.91	-1.69202	0.288769	-5.85944	4.64e-09	1.18e-07
ENSGALG00000009475_FAM133B	1373.7	-1.5144	0.258561	-5.85704	4.71e-09	1.19e-07
ENSGALG00000049027	736.495	-1.93424	0.33051	-5.85229	4.85e-09	1.22e-07
ENSGALG00000041575_PPP1R14C	56.4516	-3.97939	0.680592	-5.84694	5.01e-09	1.26e-07
ENSGALG00000029260_H-RAS	1946.17	-1.50271	0.257101	-5.84481	5.07e-09	1.28e-07
ENSGALG00000029999_CCDC102A	251.515	-2.24139	0.383987	-5.83716	5.31e-09	1.33e-07
ENSGALG00000035869_ATAD3A	337.559	-1.87745	0.321664	-5.83666	5.33e-09	1.33e-07
ENSGALG00000002160_B2M	17351.7	-1.54232	0.264282	-5.8359	5.35e-09	1.34e-07
ENSGALG00000010745_HMGB2	438.646	-1.67771	0.287563	-5.83422	5.4e-09	1.35e-07
ENSGALG00000033405_DBN1	108.607	-2.7429	0.470565	-5.82895	5.58e-09	1.39e-07
ENSGALG00000016062_PSMG1	273.55	1.84823	0.317155	5.82753	5.63e-09	1.4e-07
ENSGALG00000026553	491.458	-1.64237	0.28209	-5.82215	5.81e-09	1.44e-07
ENSGALG00000038850_WNK2	484.382	-2.04938	0.352056	-5.82118	5.84e-09	1.45e-07
ENSGALG00000034100_UACA	2696.17	-1.43611	0.246746	-5.82019	5.88e-09	1.46e-07
ENSGALG00000031373_PADI3	76.4322	-2.86217	0.492005	-5.81737	5.98e-09	1.48e-07
ENSGALG00000031216_FLOT2	1644.67	-1.39313	0.239515	-5.81645	6.01e-09	1.48e-07
ENSGALG00000000787_DHX38	1241.9	-1.71245	0.294527	-5.81423	6.09e-09	1.5e-07
ENSGALG00000009677_SSB	1359.37	-1.43013	0.246101	-5.81114	6.2e-09	1.53e-07
ENSGALG00000043513_TEAD3	344.441	-2.26223	0.389574	-5.80693	6.36e-09	1.56e-07
ENSGALG00000050645	58.978	-3.77798	0.650628	-5.80666	6.37e-09	1.56e-07
ENSGALG00000000747_CHD5	429.892	-1.77709	0.306677	-5.79466	6.85e-09	1.68e-07
ENSGALG00000015209_NFIL3	748.799	1.6673	0.287841	5.79242	6.94e-09	1.7e-07
ENSGALG00000038666	81.02	-2.74351	0.474071	-5.78712	7.16e-09	1.75e-07
ENSGALG00000011671_SLC15A2	73.0863	3.63453	0.628303	5.78468	7.27e-09	1.77e-07
ENSGALG00000009314_CACUL1	550.143	1.62775	0.281474	5.78294	7.34e-09	1.79e-07
ENSGALG00000035138_UBL5	623.91	-1.64362	0.284503	-5.77718	7.6e-09	1.84e-07
ENSGALG00000053916_ABCB1	17905.5	1.48425	0.257216	5.77044	7.91e-09	1.92e-07
ENSGALG00000038593	60.6618	3.93438	0.682334	5.76607	8.11e-09	1.96e-07
ENSGALG00000053041	215.807	1.97118	0.341875	5.7658	8.13e-09	1.96e-07
ENSGALG00000011206_KITLG	330.191	1.92183	0.333343	5.76532	8.15e-09	1.97e-07
ENSGALG00000013537_TPM3	4205.31	-1.48294	0.257378	-5.76172	8.33e-09	2.01e-07
ENSGALG00000004098_STK4	889.143	-1.49546	0.259765	-5.75696	8.56e-09	2.06e-07
ENSGALG00000013740_SLC20A1	1066.23	-1.42232	0.247079	-5.75654	8.59e-09	2.06e-07
ENSGALG00000038278_TRIM7.2	248.753	-1.97288	0.342876	-5.75392	8.72e-09	2.09e-07
ENSGALG00000023936	1753.5	1.87119	0.325305	5.7521	8.81e-09	2.11e-07
ENSGALG00000038933_FABP7	74.158	-2.8377	0.493507	-5.75006	8.92e-09	2.13e-07
ENSGALG00000017321_PLEKHB1	572.441	-1.56648	0.272529	-5.74794	9.03e-09	2.15e-07
ENSGALG00000027428_ZDHHC21	1187.86	1.45669	0.253598	5.7441	9.24e-09	2.2e-07
ENSGALG00000002201_PPL	3793	-1.84703	0.321917	-5.7376	9.6e-09	2.28e-07
ENSGALG00000002341_AP3S1	435.408	1.63272	0.284714	5.73461	9.77e-09	2.32e-07
ENSGALG00000044326	778.202	-1.55189	0.271042	-5.72563	1.03e-08	2.44e-07
ENSGALG00000007963_NFATC2	671.213	-2.03375	0.355686	-5.71783	1.08e-08	2.55e-07
ENSGALG00000008970_NRK	2859.13	-1.59879	0.27968	-5.71647	1.09e-08	2.57e-07
ENSGALG00000036962_KPNB1	1473.09	-1.8285	0.319992	-5.71422	1.1e-08	2.6e-07
ENSGALG00000005848_IL11RA	112.612	-2.39629	0.419586	-5.71107	1.12e-08	2.64e-07
ENSGALG00000008821_NDUFA5	845.564	1.63755	0.287182	5.70214	1.18e-08	2.78e-07
ENSGALG00000040908_HIP1	574.813	-1.65854	0.290922	-5.701	1.19e-08	2.8e-07
ENSGALG00000001545_RAB40B	341.145	1.98715	0.348656	5.69947	1.2e-08	2.82e-07
ENSGALG00000053678	240.906	1.8857	0.33096	5.69767	1.21e-08	2.84e-07
ENSGALG00000016547_TXLNG	388.317	-1.70219	0.299032	-5.69233	1.25e-08	2.93e-07
ENSGALG00000001647_PSKH1	126.339	-2.25751	0.396761	-5.68985	1.27e-08	2.97e-07
ENSGALG00000006911_TMC5	1328.68	1.49795	0.26337	5.6876	1.29e-08	3e-07
ENSGALG00000051461	41.6756	-6.75711	1.18907	-5.68267	1.33e-08	3.08e-07
ENSGALG00000007700_CTTN	3876.57	-1.37445	0.241988	-5.67982	1.35e-08	3.13e-07
ENSGALG00000040993_BAMBI	770.895	1.50657	0.265258	5.67962	1.35e-08	3.13e-07
ENSGALG00000039411_COL25A1	81.367	-2.79423	0.492459	-5.67404	1.39e-08	3.23e-07
ENSGALG00000023199_HNRNPDL	6705.25	-1.37593	0.242724	-5.66872	1.44e-08	3.32e-07
ENSGALG00000037519_C1orf35	101.654	-2.56219	0.452662	-5.66027	1.51e-08	3.49e-07
ENSGALG00000038904_ARL6IP5	837.955	1.49069	0.263749	5.65191	1.59e-08	3.65e-07
ENSGALG00000042572	202.841	2.09326	0.370534	5.64931	1.61e-08	3.7e-07
ENSGALG00000011618_ADSSL1	651.794	-1.5286	0.270814	-5.64446	1.66e-08	3.8e-07
ENSGALG00000008498_MALRD1	2600.48	1.47902	0.262101	5.64295	1.67e-08	3.83e-07
ENSGALG00000035017	700.216	-1.82443	0.323349	-5.64227	1.68e-08	3.84e-07
ENSGALG00000003434_C17orf75	370.792	1.73659	0.307804	5.64188	1.68e-08	3.84e-07
ENSGALG00000009369_PRDX3	870.488	1.51925	0.2696	5.63521	1.75e-08	3.99e-07
ENSGALG00000039329	77.9192	-2.83064	0.502835	-5.62937	1.81e-08	4.12e-07
ENSGALG00000005824_SUSD2	1028.59	2.30464	0.409755	5.62444	1.86e-08	4.23e-07
ENSGALG00000026443_RNF44	51.1647	-3.41859	0.60791	-5.62351	1.87e-08	4.25e-07
ENSGALG00000054038	33.3293	-4.84971	0.862937	-5.62001	1.91e-08	4.33e-07
ENSGALG00000007395	598.82	2.30726	0.410578	5.61954	1.91e-08	4.34e-07
ENSGALG00000052763_BTG2	3281.43	1.65353	0.294722	5.61046	2.02e-08	4.56e-07
ENSGALG00000023682_GTF2H3	241.562	1.83226	0.326661	5.60907	2.03e-08	4.59e-07
ENSGALG00000023066_DNAJA1	3037.7	-1.46119	0.260691	-5.60504	2.08e-08	4.69e-07
ENSGALG00000046616_CHGB	114.371	-2.35611	0.420667	-5.6009	2.13e-08	4.8e-07
ENSGALG00000035623_LIMD1	677.762	1.66735	0.297863	5.5977	2.17e-08	4.88e-07
ENSGALG00000015895_HTR1B	107.762	-2.34562	0.419113	-5.59663	2.19e-08	4.9e-07
ENSGALG00000006731_TAF3	1104.32	-1.53832	0.275177	-5.5903	2.27e-08	5.08e-07
ENSGALG00000034999_ZHX1	1003.51	-1.39188	0.249126	-5.58704	2.31e-08	5.17e-07
ENSGALG00000003106_TOX2	167.703	-2.21646	0.397081	-5.58188	2.38e-08	5.31e-07
ENSGALG00000034741_ETNPPL	367.812	1.98788	0.356116	5.58211	2.38e-08	5.31e-07
ENSGALG00000011803_EMP1	666.865	-1.60943	0.288366	-5.58121	2.39e-08	5.32e-07
ENSGALG00000043002_TOMM6	388.458	1.77727	0.318734	5.57602	2.46e-08	5.47e-07
ENSGALG00000033656_DQX1	923.395	1.48143	0.265701	5.57555	2.47e-08	5.48e-07
ENSGALG00000012361_NIN	178.202	-2.21665	0.397726	-5.57331	2.5e-08	5.54e-07
ENSGALG00000029702	540.495	-1.54984	0.278098	-5.57298	2.5e-08	5.54e-07
ENSGALG00000045362	46.1246	4.23937	0.761166	5.56957	2.55e-08	5.64e-07
ENSGALG00000017244_PRSS23	1353.18	-1.47309	0.264552	-5.56825	2.57e-08	5.68e-07
ENSGALG00000017318_PAAF1	120.803	-2.51026	0.451324	-5.56199	2.67e-08	5.87e-07
ENSGALG00000040238_IMP3	140.932	2.28706	0.411182	5.56216	2.66e-08	5.87e-07
ENSGALG00000012024_MRTFA	700.024	-1.99787	0.36006	-5.54872	2.88e-08	6.32e-07
ENSGALG00000002179_FBF1	412.853	-1.57794	0.284678	-5.5429	2.98e-08	6.53e-07
ENSGALG00000012166_SLC35F5	1623.55	1.37714	0.248541	5.54091	3.01e-08	6.59e-07
ENSGALG00000034392	134.342	-2.34551	0.423737	-5.53529	3.11e-08	6.8e-07
ENSGALG00000016617_NCOA1	918.878	-1.87815	0.339499	-5.53212	3.16e-08	6.91e-07
ENSGALG00000037946_RBM4	797.508	-1.53978	0.27851	-5.52864	3.23e-08	7.04e-07
ENSGALG00000017135_CRYL1	1934.7	-1.34386	0.243174	-5.52635	3.27e-08	7.12e-07
ENSGALG00000008599	2302.88	1.7043	0.308465	5.5251	3.29e-08	7.14e-07
ENSGALG00000021345_B3GNT9	283.866	-1.69656	0.307052	-5.52531	3.29e-08	7.14e-07
ENSGALG00000054599	879.883	-1.49209	0.270057	-5.52508	3.29e-08	7.14e-07
ENSGALG00000035913_PPP1R27	76.3982	3.391	0.61396	5.52316	3.33e-08	7.21e-07
ENSGALG00000007260_ZEB1	2297.88	-1.34379	0.243386	-5.52124	3.37e-08	7.27e-07
ENSGALG00000016174_LMBRD1	772.54	1.42455	0.25801	5.5213	3.37e-08	7.27e-07
ENSGALG00000032588_ARPC1B	943.569	1.39073	0.251904	5.52088	3.37e-08	7.27e-07
ENSGALG00000040784_RAB39B	746.433	-1.53441	0.278393	-5.51168	3.55e-08	7.65e-07
ENSGALG00000030530_HAND2	354.909	-1.77409	0.322288	-5.50467	3.7e-08	7.95e-07
ENSGALG00000051668	28.3837	-5.64952	1.02727	-5.49953	3.81e-08	8.17e-07
ENSGALG00000004696_LEO1	662.063	-1.46517	0.266678	-5.49416	3.93e-08	8.4e-07
ENSGALG00000014922_ROCK1	4449.07	-1.28698	0.234241	-5.49427	3.92e-08	8.4e-07
ENSGALG00000041494_GOLGB1	5739.16	-1.36234	0.248086	-5.4914	3.99e-08	8.52e-07
ENSGALG00000048178_SLC27A3	292.88	-1.81569	0.330714	-5.49021	4.01e-08	8.57e-07
ENSGALG00000015471_CCNC	575.846	1.55071	0.282767	5.48407	4.16e-08	8.86e-07
ENSGALG00000003681_TOP1	1455.15	-1.52699	0.278545	-5.48201	4.21e-08	8.95e-07
ENSGALG00000016880_UBAC2	918.949	1.4462	0.263922	5.47965	4.26e-08	9.05e-07
ENSGALG00000003053_PRDX6	1276.67	-1.57186	0.287104	-5.47488	4.38e-08	9.29e-07
ENSGALG00000026687_PLCD4	111.877	-2.50565	0.457766	-5.47365	4.41e-08	9.33e-07
ENSGALG00000049473	166.661	-1.94405	0.355165	-5.47365	4.41e-08	9.33e-07
ENSGALG00000046727	200.677	-2.42327	0.442823	-5.47232	4.44e-08	9.38e-07
ENSGALG00000037787_MEF2D	552.373	-2.09516	0.38303	-5.46996	4.5e-08	9.5e-07
ENSGALG00000042051_SETD2	3569.41	-1.58664	0.290272	-5.46604	4.6e-08	9.69e-07
ENSGALG00000009013_MKKS	931.786	1.40294	0.256695	5.46541	4.62e-08	9.71e-07
ENSGALG00000037784_DAG1	1476.84	-1.54782	0.283563	-5.45847	4.8e-08	1.01e-06
ENSGALG00000011986_FABP2	13857.4	4.7584	0.871947	5.45721	4.84e-08	1.01e-06
ENSGALG00000015331_GNE	2651.44	1.35705	0.248663	5.45739	4.83e-08	1.01e-06
ENSGALG00000009139_TMEM185A	545.699	1.50754	0.276351	5.45516	4.89e-08	1.02e-06
ENSGALG00000037360_DDX17	4069.47	-1.42835	0.261871	-5.4544	4.91e-08	1.03e-06
ENSGALG00000035911_CBX4	272.869	-1.77638	0.325982	-5.44932	5.06e-08	1.05e-06
ENSGALG00000049229	231.405	-1.871	0.343878	-5.44089	5.3e-08	1.1e-06
ENSGALG00000001986_VCP	3147.6	-1.68217	0.309269	-5.43918	5.35e-08	1.11e-06
ENSGALG00000011692_CDCA4	1011.2	1.36753	0.251627	5.43472	5.49e-08	1.14e-06
ENSGALG00000014711_PLPP1	1077.77	1.41073	0.259647	5.43325	5.53e-08	1.15e-06
ENSGALG00000050127	435.037	-1.70285	0.313475	-5.43217	5.57e-08	1.15e-06
ENSGALG00000011209_EVL	1957.32	-1.70137	0.313222	-5.43185	5.58e-08	1.15e-06
ENSGALG00000031482_Pou5f3	142.93	-2.35339	0.433349	-5.43071	5.61e-08	1.16e-06
ENSGALG00000006794	1106.38	-1.35408	0.249426	-5.42878	5.67e-08	1.17e-06
ENSGALG00000046927	75.7858	2.79473	0.514791	5.42887	5.67e-08	1.17e-06
ENSGALG00000001024_TPRG1L	2715.42	1.3127	0.24202	5.42391	5.83e-08	1.2e-06
ENSGALG00000007171	867.938	1.60344	0.295618	5.42403	5.83e-08	1.2e-06
ENSGALG00000051594_FBXO46	158.732	-2.29301	0.423063	-5.42002	5.96e-08	1.22e-06
ENSGALG00000010551_CDC42EP3	902.709	1.44953	0.267841	5.41193	6.23e-08	1.28e-06
ENSGALG00000000674_MYO1D	2456.81	-1.42495	0.263339	-5.41107	6.26e-08	1.28e-06
ENSGALG00000041417_ACADSB	1920.27	-1.60137	0.295969	-5.41059	6.28e-08	1.28e-06
ENSGALG00000021658_PAFAH2	179.762	2.14266	0.396121	5.4091	6.33e-08	1.29e-06
ENSGALG00000002682_BRD3	309.657	-2.06721	0.382247	-5.40805	6.37e-08	1.3e-06
ENSGALG00000002870_LEMD2	575.103	-1.56653	0.289893	-5.40382	6.52e-08	1.33e-06
ENSGALG00000054913	450.632	-1.96643	0.363947	-5.40307	6.55e-08	1.33e-06
ENSGALG00000003457_CNP	728.831	-1.52861	0.283034	-5.4008	6.63e-08	1.35e-06
ENSGALG00000026995_RHOG	104.828	-2.571	0.476699	-5.39334	6.92e-08	1.4e-06
ENSGALG00000026493_RALB	1724.53	-1.46257	0.271244	-5.39207	6.97e-08	1.41e-06
ENSGALG00000038923	1107.12	1.69478	0.314644	5.38633	7.19e-08	1.45e-06
ENSGALG00000042137_ELK4	373.805	-1.59859	0.296911	-5.38409	7.28e-08	1.47e-06
ENSGALG00000030187_CAT	7155.52	1.32307	0.245778	5.3832	7.32e-08	1.47e-06
ENSGALG00000009868_ZNF330	244.622	-1.73122	0.321768	-5.38032	7.44e-08	1.5e-06
ENSGALG00000004088_FNBP1	2435.51	-1.37482	0.255579	-5.37925	7.48e-08	1.5e-06
ENSGALG00000010689_MAGOH	444.578	1.70191	0.316393	5.3791	7.49e-08	1.5e-06
ENSGALG00000027365_HIVEP3	576.35	-2.14937	0.399675	-5.37779	7.54e-08	1.51e-06
ENSGALG00000007769_FOXP1	964.158	-1.51633	0.282013	-5.37682	7.58e-08	1.51e-06
ENSGALG00000012919_YARS2	333.807	1.85892	0.345725	5.37686	7.58e-08	1.51e-06
ENSGALG00000054869_U8	69.5139	-3.62327	0.674337	-5.37309	7.74e-08	1.54e-06
ENSGALG00000001918_DNAJB5	1331.89	-1.72326	0.320736	-5.37281	7.75e-08	1.54e-06
ENSGALG00000004767_ODF2	590.269	-1.42927	0.266138	-5.37041	7.86e-08	1.56e-06
ENSGALG00000011118_MIER1	837.836	-1.6376	0.304918	-5.37063	7.85e-08	1.56e-06
ENSGALG00000029000_HYAL3	131.535	2.54358	0.474351	5.36222	8.22e-08	1.63e-06
ENSGALG00000054841_Metazoa_SRP	109.141	3.7938	0.708161	5.35726	8.45e-08	1.67e-06
ENSGALG00000020260_PGRMC1	4494.97	1.3944	0.260436	5.35408	8.6e-08	1.7e-06
ENSGALG00000010060_PSMA6	925.565	1.48323	0.277251	5.34977	8.81e-08	1.74e-06
ENSGALG00000036666_ZCCHC10	319.822	1.66578	0.311604	5.34582	9e-08	1.78e-06
ENSGALG00000000669_ETV3	346.959	-1.63409	0.305786	-5.3439	9.1e-08	1.79e-06
ENSGALG00000015330_PCNP	806.387	-1.61517	0.302262	-5.34359	9.11e-08	1.79e-06
ENSGALG00000009291_EPHX1	1116.94	1.49079	0.279098	5.34146	9.22e-08	1.81e-06
ENSGALG00000006043_RBBP6	2331.23	-1.36495	0.255785	-5.33633	9.48e-08	1.86e-06
ENSGALG00000003356_TM2D2	356.99	1.59465	0.299509	5.32422	1.01e-07	1.99e-06
ENSGALG00000033061_CAMK2B	167.799	-2.24288	0.421353	-5.32303	1.02e-07	2e-06
ENSGALG00000040493_PTN	2216.25	-1.53491	0.288382	-5.32249	1.02e-07	2e-06
ENSGALG00000016936_TDRD3	990.741	-1.42398	0.267618	-5.32096	1.03e-07	2.02e-06
ENSGALG00000031160_GRSF1	460.73	-1.60771	0.302154	-5.32083	1.03e-07	2.02e-06
ENSGALG00000050350_HIST1H2B7	458.515	-1.53591	0.288739	-5.31937	1.04e-07	2.03e-06
ENSGALG00000031410_ENPEP	31540.6	1.52552	0.286873	5.31776	1.05e-07	2.04e-06
ENSGALG00000044788_ZNF628	344.565	-2.00266	0.376761	-5.31546	1.06e-07	2.07e-06
ENSGALG00000014833_RPL37	4758.7	1.41236	0.265727	5.3151	1.07e-07	2.07e-06
ENSGALG00000040626_NDUFA2	226.949	2.07384	0.390359	5.31265	1.08e-07	2.09e-06
ENSGALG00000009963_LYZ	255.958	1.88999	0.355793	5.31203	1.08e-07	2.1e-06
ENSGALG00000009421_SRSF5	515.601	-1.4787	0.278386	-5.31168	1.09e-07	2.1e-06
ENSGALG00000006855_MELTF	1754.87	1.66103	0.312904	5.30845	1.11e-07	2.13e-06
ENSGALG00000032219_FUS	941.706	-1.69489	0.319489	-5.30501	1.13e-07	2.17e-06
ENSGALG00000008240_CFLAR	1229.74	1.33741	0.252512	5.29639	1.18e-07	2.27e-06
ENSGALG00000004042_NUFIP2	297.268	-1.62089	0.306081	-5.29561	1.19e-07	2.28e-06
ENSGALG00000035841_PRRC2C	7898.95	-1.29827	0.245316	-5.29222	1.21e-07	2.32e-06
ENSGALG00000040087_ZNF609	1380.74	-1.54073	0.29116	-5.29168	1.21e-07	2.32e-06
ENSGALG00000000146_SUPT6H	2628.4	-1.27656	0.241419	-5.28776	1.24e-07	2.37e-06
ENSGALG00000002932_NME2	2128.48	-1.30996	0.247768	-5.28704	1.24e-07	2.38e-06
ENSGALG00000016196	1770.43	-9.10277	1.72201	-5.28614	1.25e-07	2.39e-06
ENSGALG00000036355_C7orf73	454.586	1.61385	0.305321	5.28575	1.25e-07	2.39e-06
ENSGALG00000002830_NUDT3	230.35	-1.7225	0.325894	-5.28545	1.25e-07	2.39e-06
ENSGALG00000031426_TMBIM6	2665.91	-1.33886	0.253392	-5.28377	1.27e-07	2.41e-06
ENSGALG00000008285_NAPEPLD	3541.53	1.65586	0.313701	5.27845	1.3e-07	2.47e-06
ENSGALG00000008542_ADD3	4176.01	-1.25048	0.236913	-5.27822	1.3e-07	2.47e-06
ENSGALG00000011172	594.243	-1.5949	0.302166	-5.27821	1.3e-07	2.47e-06
ENSGALG00000048869	545.408	1.53607	0.291111	5.27658	1.32e-07	2.49e-06
ENSGALG00000003570_ATIC	1297.16	1.35197	0.25635	5.27392	1.34e-07	2.53e-06
ENSGALG00000031527_ARL8BL	267.211	-1.87825	0.356212	-5.27285	1.34e-07	2.54e-06
ENSGALG00000041205	75.2931	3.24326	0.615182	5.27204	1.35e-07	2.54e-06
ENSGALG00000052072	520.328	-1.474	0.279634	-5.27118	1.36e-07	2.55e-06
ENSGALG00000004108	671.916	-1.39214	0.264155	-5.27016	1.36e-07	2.56e-06
ENSGALG00000041626_MEIS1	976.521	-1.32647	0.251844	-5.26702	1.39e-07	2.61e-06
ENSGALG00000036498_EHD2	1392.08	-1.99182	0.378276	-5.26553	1.4e-07	2.62e-06
ENSGALG00000002588_PPARD	1160.1	-1.42271	0.270342	-5.26262	1.42e-07	2.66e-06
ENSGALG00000028204_GPX1	609.993	1.51793	0.288491	5.26163	1.43e-07	2.67e-06
ENSGALG00000015388_PRDM1	227.382	-1.91776	0.364588	-5.26006	1.44e-07	2.69e-06
ENSGALG00000049677	53.0179	-3.68694	0.701637	-5.25477	1.48e-07	2.77e-06
ENSGALG00000002841_RFNG	607.181	1.42277	0.271167	5.24683	1.55e-07	2.89e-06
ENSGALG00000012584_MARCH7	1159.79	1.33637	0.254903	5.24265	1.58e-07	2.95e-06
ENSGALG00000037504_CFAP36	252.806	-1.64998	0.314749	-5.24221	1.59e-07	2.95e-06
ENSGALG00000040266_GLI3	423.982	-1.57005	0.299939	-5.23457	1.65e-07	3.07e-06
ENSGALG00000015804_LTN1	1414.76	1.33687	0.255444	5.2335	1.66e-07	3.09e-06
ENSGALG00000023581_UTS2R	70.8817	-2.65814	0.508522	-5.22718	1.72e-07	3.18e-06
ENSGALG00000026298_SERTAD2	527.236	-1.59337	0.304823	-5.22719	1.72e-07	3.18e-06
ENSGALG00000037299_LYRM7	175.603	1.90726	0.364886	5.227	1.72e-07	3.18e-06
ENSGALG00000013879_TIA1	826.395	-1.34709	0.257864	-5.22403	1.75e-07	3.23e-06
ENSGALG00000005204	504.081	-2.17736	0.416969	-5.22186	1.77e-07	3.27e-06
ENSGALG00000041338	97.1749	2.36589	0.4533	5.21925	1.8e-07	3.31e-06
ENSGALG00000007418_CD3D	486.594	1.46782	0.281325	5.21751	1.81e-07	3.34e-06
ENSGALG00000028908_HOXA6	126.901	-2.06584	0.396133	-5.21501	1.84e-07	3.38e-06
ENSGALG00000001034_AAR2	646.776	1.44416	0.277357	5.20687	1.92e-07	3.52e-06
ENSGALG00000033162_PSMD3	1318.79	1.3685	0.262883	5.20572	1.93e-07	3.54e-06
ENSGALG00000049450	1762.63	-1.60468	0.308356	-5.20398	1.95e-07	3.57e-06
ENSGALG00000000660_CYB5B	1071.84	-1.36516	0.262489	-5.20083	1.98e-07	3.62e-06
ENSGALG00000054271_MED28	238.927	1.8564	0.356941	5.20086	1.98e-07	3.62e-06
ENSGALG00000024039	637.489	-1.42207	0.273543	-5.19872	2.01e-07	3.66e-06
ENSGALG00000039228_ZFP36L1	1239.16	-1.52175	0.292779	-5.1976	2.02e-07	3.68e-06
ENSGALG00000012809_ECI2	1070.46	1.42105	0.273441	5.1969	2.03e-07	3.69e-06
ENSGALG00000027513_HOXD9	68.3624	-2.65035	0.510148	-5.19527	2.04e-07	3.71e-06
ENSGALG00000049024_CD7	691.993	1.39204	0.267955	5.19504	2.05e-07	3.71e-06
ENSGALG00000044813_THUMPD3	1001.27	-1.35295	0.260482	-5.19404	2.06e-07	3.73e-06
ENSGALG00000030068_RAB3A	223.159	-1.90986	0.367796	-5.19273	2.07e-07	3.75e-06
ENSGALG00000009842_RASSF3	3984.86	-1.26926	0.244612	-5.18888	2.12e-07	3.82e-06
ENSGALG00000010285_MRPL14	274.573	1.77347	0.341836	5.18806	2.12e-07	3.84e-06
ENSGALG00000042099	41.9321	4.57183	0.881429	5.18683	2.14e-07	3.86e-06
ENSGALG00000006357_XPC	478.88	-1.50866	0.290925	-5.18575	2.15e-07	3.87e-06
ENSGALG00000038740_AMY2A	31.6304	-4.13511	0.797748	-5.18348	2.18e-07	3.92e-06
ENSGALG00000036293_EBAG9	1110.76	-1.38996	0.268262	-5.18135	2.2e-07	3.96e-06
ENSGALG00000012285_BAIAP2L2	630.048	1.70749	0.329717	5.17865	2.23e-07	4.01e-06
ENSGALG00000004848_YBX1	15736.9	-1.30158	0.251568	-5.17388	2.29e-07	4.1e-06
ENSGALG00000006323_LECT2	40.2032	-3.44611	0.666084	-5.17368	2.3e-07	4.1e-06
ENSGALG00000031069	162.665	-1.84694	0.356959	-5.1741	2.29e-07	4.1e-06
ENSGALG00000007711_RPL4	10239.3	-1.34077	0.259281	-5.17111	2.33e-07	4.16e-06
ENSGALG00000054304	780.962	-1.43392	0.277371	-5.1697	2.34e-07	4.18e-06
ENSGALG00000053254_EHHADH	2881.14	1.43862	0.278538	5.16492	2.41e-07	4.29e-06
ENSGALG00000003169_CBFB	735.066	-1.33592	0.258798	-5.16203	2.44e-07	4.35e-06
ENSGALG00000010493_INPP5A	1183.59	1.31674	0.255103	5.16161	2.45e-07	4.35e-06
ENSGALG00000002790_ABLIM3	91.32	-2.56052	0.496109	-5.16121	2.45e-07	4.36e-06
ENSGALG00000010301_EIF2B2	392.512	-1.49911	0.290596	-5.15872	2.49e-07	4.41e-06
ENSGALG00000017358_YWHAG	1951.28	-1.26795	0.245794	-5.1586	2.49e-07	4.41e-06
ENSGALG00000012792_HIPK2	2005.93	-1.47143	0.28532	-5.15714	2.51e-07	4.44e-06
ENSGALG00000053336	687.569	1.69867	0.329438	5.15626	2.52e-07	4.45e-06
ENSGALG00000029862	672.202	2.15619	0.41822	5.15564	2.53e-07	4.46e-06
ENSGALG00000039134	93.0689	-2.58055	0.500606	-5.15485	2.54e-07	4.47e-06
ENSGALG00000029764	30.5249	-4.25853	0.826196	-5.15438	2.54e-07	4.48e-06
ENSGALG00000015416_SDR16C5	2768.7	1.4207	0.275774	5.15166	2.58e-07	4.54e-06
ENSGALG00000014331_FKBP4	2935.62	-1.32092	0.256634	-5.14711	2.65e-07	4.65e-06
ENSGALG00000000402_LOXL2	630.998	-1.4788	0.287783	-5.13858	2.77e-07	4.86e-06
ENSGALG00000043047_SOBP	145.512	-2.33647	0.454822	-5.13711	2.79e-07	4.89e-06
ENSGALG00000001731_CDK12	655.011	-1.52878	0.297646	-5.13624	2.8e-07	4.9e-06
ENSGALG00000044213_METTL3	371.172	-1.61607	0.314659	-5.13596	2.81e-07	4.91e-06
ENSGALG00000049026_MAP2K7	344.468	-1.55361	0.302598	-5.13424	2.83e-07	4.95e-06
ENSGALG00000042589	98.4136	2.38149	0.463874	5.13392	2.84e-07	4.95e-06
ENSGALG00000054034_TNKS1BP1	1113.39	-1.67645	0.326571	-5.13349	2.84e-07	4.95e-06
ENSGALG00000012048_LARP7	615.931	-1.37839	0.26854	-5.13291	2.85e-07	4.96e-06
ENSGALG00000040426_CREG1	2030.22	1.25251	0.244075	5.13165	2.87e-07	4.99e-06
ENSGALG00000030918_RBM3	2612.35	-1.28241	0.249916	-5.13137	2.88e-07	4.99e-06
ENSGALG00000016775_RPL31	4877.77	1.31761	0.256795	5.13095	2.88e-07	5e-06
ENSGALG00000034297_TBX2	237.781	-1.84613	0.359932	-5.12911	2.91e-07	5.04e-06
ENSGALG00000014432_RPS20	5018.19	1.42476	0.278008	5.12487	2.98e-07	5.15e-06
ENSGALG00000005086_PLAU	1268.71	-1.2444	0.24294	-5.12227	3.02e-07	5.21e-06
ENSGALG00000042607_RSPO3	365.632	-1.54972	0.302573	-5.12181	3.03e-07	5.22e-06
ENSGALG00000033441_COX14	261.279	2.41876	0.472629	5.11766	3.09e-07	5.33e-06
ENSGALG00000040465_ZEB2	2851.6	-1.55115	0.303181	-5.11625	3.12e-07	5.37e-06
ENSGALG00000050253	31.9393	-4.0008	0.78255	-5.11252	3.18e-07	5.47e-06
ENSGALG00000011994_SYNPO2	9339.62	-1.42448	0.278707	-5.11103	3.2e-07	5.5e-06
ENSGALG00000054354	281.457	1.8014	0.35259	5.10904	3.24e-07	5.55e-06
ENSGALG00000050634	48.3645	-3.44733	0.675252	-5.10524	3.3e-07	5.66e-06
ENSGALG00000043744_NDFIP1	2339.76	1.30567	0.256001	5.10026	3.39e-07	5.81e-06
ENSGALG00000010627_PRPF38A	337.307	-1.53296	0.300643	-5.09894	3.42e-07	5.84e-06
ENSGALG00000011094_PDE4B	235.602	-2.02246	0.396911	-5.0955	3.48e-07	5.94e-06
ENSGALG00000002501_VKORC1L1	447.064	1.4958	0.293663	5.09358	3.51e-07	5.99e-06
ENSGALG00000050267_CALU	352.283	-1.8579	0.364903	-5.0915	3.55e-07	6.05e-06
ENSGALG00000049524	789.023	1.46646	0.288124	5.08966	3.59e-07	6.1e-06
ENSGALG00000040489	32.3686	8.0256	1.57758	5.08727	3.63e-07	6.17e-06
ENSGALG00000010027_CFL2	1766.18	-1.52469	0.299751	-5.08652	3.65e-07	6.18e-06
ENSGALG00000034493_DCLK3	283.474	-1.56315	0.307311	-5.08655	3.65e-07	6.18e-06
ENSGALG00000020201_CEP44	213.561	1.77125	0.34845	5.08324	3.71e-07	6.28e-06
ENSGALG00000006378_LIPA	1640.92	1.2222	0.240486	5.0822	3.73e-07	6.31e-06
ENSGALG00000015573_FHL5	974.474	1.28477	0.252892	5.08032	3.77e-07	6.37e-06
ENSGALG00000048109	1994.33	-1.21336	0.238919	-5.07854	3.8e-07	6.42e-06
ENSGALG00000016921_UCHL3	361.896	1.59662	0.314562	5.07571	3.86e-07	6.51e-06
ENSGALG00000015591_ACOX3	282.04	1.87611	0.369658	5.07525	3.87e-07	6.52e-06
ENSGALG00000007792_PFDN4	562.75	1.45061	0.285921	5.07348	3.91e-07	6.57e-06
ENSGALG00000010133_PTCH2	425.606	-1.64357	0.324084	-5.07142	3.95e-07	6.63e-06
ENSGALG00000008873_POLE3	610.219	-1.35634	0.267595	-5.06863	4.01e-07	6.73e-06
ENSGALG00000000903_TERF2IP	1037.42	1.34412	0.265273	5.06691	4.04e-07	6.78e-06
ENSGALG00000026231_ARID3A	210.491	-1.82019	0.359298	-5.06595	4.06e-07	6.81e-06
ENSGALG00000018815_PCGF2	169.387	-1.77644	0.350886	-5.06272	4.13e-07	6.91e-06
ENSGALG00000043610	643.657	-1.50503	0.297271	-5.06281	4.13e-07	6.91e-06
ENSGALG00000049431	998.475	-1.28075	0.253046	-5.06133	4.16e-07	6.95e-06
ENSGALG00000030064	348.536	-1.83555	0.362917	-5.05778	4.24e-07	7.07e-06
ENSGALG00000046965_NNF1	456.748	-1.72068	0.340579	-5.05224	4.37e-07	7.27e-06
ENSGALG00000005105_TPR	3765.64	-1.43765	0.284773	-5.04841	4.45e-07	7.41e-06
ENSGALG00000001476	2668.32	-1.25811	0.249492	-5.0427	4.59e-07	7.63e-06
ENSGALG00000015917_EEF1A1	89960.4	1.23359	0.244803	5.0391	4.68e-07	7.76e-06
ENSGALG00000029319_UQCRB	1348.76	1.50706	0.299112	5.03844	4.69e-07	7.78e-06
ENSGALG00000051512	39.8218	4.05572	0.80507	5.03772	4.71e-07	7.8e-06
ENSGALG00000000816	260.407	-1.8791	0.373297	-5.03381	4.81e-07	7.95e-06
ENSGALG00000000790_DNAJC8	1209.53	-1.3218	0.262702	-5.03154	4.87e-07	8.04e-06
ENSGALG00000036635	31.798	-5.0461	1.00306	-5.03072	4.89e-07	8.06e-06
ENSGALG00000003625_NDUFS5	1478.51	-1.63151	0.324388	-5.0295	4.92e-07	8.11e-06
ENSGALG00000014992_TMEM128	494.648	1.57999	0.314197	5.02867	4.94e-07	8.12e-06
ENSGALG00000039472_SART3	808.421	-1.2886	0.256246	-5.02875	4.94e-07	8.12e-06
ENSGALG00000013575_IFI6	226.148	1.91765	0.381383	5.02814	4.95e-07	8.14e-06
ENSGALG00000014934_HS3ST1	718.056	1.30986	0.260663	5.02513	5.03e-07	8.26e-06
ENSGALG00000014435_MRPL51	567.462	1.46271	0.291126	5.0243	5.05e-07	8.28e-06
ENSGALG00000003521_TPM1	27679.8	-1.58682	0.316005	-5.0215	5.13e-07	8.4e-06
ENSGALG00000000793_VPS72	836.717	-1.80064	0.358823	-5.0182	5.22e-07	8.53e-06
ENSGALG00000001833_PRKRIP1	215.69	-1.69691	0.33823	-5.01701	5.25e-07	8.58e-06
ENSGALG00000016574_GEMIN8	215.822	-1.8211	0.36338	-5.01156	5.4e-07	8.81e-06
ENSGALG00000001597_PSMB3	281.291	-1.61465	0.322398	-5.00824	5.49e-07	8.96e-06
ENSGALG00000009264_MTX2	489.524	1.38386	0.276641	5.00238	5.66e-07	9.22e-06
ENSGALG00000020742_PPRC1	133.826	-2.00776	0.401477	-5.00094	5.71e-07	9.28e-06
ENSGALG00000048627	35.1585	-7.46293	1.49279	-4.99933	5.75e-07	9.35e-06
ENSGALG00000047141	505.904	1.89074	0.378368	4.99709	5.82e-07	9.45e-06
ENSGALG00000002846_NEURL1B	396.06	-1.49245	0.298717	-4.9962	5.85e-07	9.48e-06
ENSGALG00000003326_AMACR	304.709	1.74038	0.348353	4.99603	5.85e-07	9.48e-06
ENSGALG00000007310_CEP164	214.161	-1.6939	0.33907	-4.99572	5.86e-07	9.48e-06
ENSGALG00000008092_NXT2	390.463	1.47145	0.29466	4.99373	5.92e-07	9.57e-06
ENSGALG00000014807_MTX3	479.83	1.45124	0.290651	4.99306	5.94e-07	9.59e-06
ENSGALG00000031978_TARP	1487.16	1.34914	0.270243	4.99232	5.97e-07	9.62e-06
ENSGALG00000037642_SLC23A1	181.374	2.07461	0.415627	4.99151	5.99e-07	9.65e-06
ENSGALG00000006461_UBE3C	1083.53	1.25472	0.251511	4.98872	6.08e-07	9.78e-06
ENSGALG00000003682_ARL6IP4	465.616	-1.49076	0.29903	-4.98532	6.19e-07	9.94e-06
ENSGALG00000053217	359.766	1.62806	0.326654	4.98405	6.23e-07	1e-05
ENSGALG00000007403_PEBP1	1419.07	-1.24392	0.249601	-4.98361	6.24e-07	1e-05
ENSGALG00000008595_RTF1	927.637	-1.36551	0.273999	-4.98361	6.24e-07	1e-05
ENSGALG00000002263_KLHL6	415.578	-1.66498	0.33435	-4.97975	6.37e-07	1.02e-05
ENSGALG00000003314_RILPL1	976.072	-1.27067	0.255231	-4.97851	6.41e-07	1.02e-05
ENSGALG00000034509_DYNLRB1	270.702	1.57748	0.316977	4.97665	6.47e-07	1.03e-05
ENSGALG00000031070_MAIP1	497.727	1.44255	0.289978	4.9747	6.53e-07	1.04e-05
ENSGALG00000054099	276.214	1.73362	0.348478	4.97483	6.53e-07	1.04e-05
ENSGALG00000005465_NDUFB10	1739.69	-1.33407	0.268352	-4.97134	6.65e-07	1.06e-05
ENSGALG00000028439_SHLD2	1206.45	1.50724	0.303223	4.97074	6.67e-07	1.06e-05
ENSGALG00000054322	294.588	-1.58827	0.319536	-4.97054	6.68e-07	1.06e-05
ENSGALG00000048320_HINT2	1777.79	1.38267	0.278186	4.97031	6.68e-07	1.06e-05
ENSGALG00000003921_DBNDD2	1164.07	-1.25337	0.252201	-4.96974	6.7e-07	1.06e-05
ENSGALG00000051392	49.9759	3.21094	0.646081	4.96987	6.7e-07	1.06e-05
ENSGALG00000011139_CCDC85C	568.835	-1.36014	0.273699	-4.96949	6.71e-07	1.06e-05
ENSGALG00000052743_ARL4C	173.333	-1.75519	0.353738	-4.96183	6.98e-07	1.1e-05
ENSGALG00000029512_SPTBN1	19855.3	-1.19817	0.241518	-4.961	7.01e-07	1.11e-05
ENSGALG00000014261_UCHL1	237.784	1.84436	0.37216	4.95582	7.2e-07	1.14e-05
ENSGALG00000040342_ADAMTS1	356.232	-1.57315	0.317457	-4.95549	7.21e-07	1.14e-05
ENSGALG00000011306_DES	43694.9	-1.18447	0.239097	-4.95395	7.27e-07	1.14e-05
ENSGALG00000046971	114.651	2.09063	0.422002	4.95409	7.27e-07	1.14e-05
ENSGALG00000012425_FERMT2	1523.52	-1.76527	0.356354	-4.95369	7.28e-07	1.14e-05
ENSGALG00000008518	315.43	-1.47793	0.298381	-4.95317	7.3e-07	1.14e-05
ENSGALG00000002205_FBRSL1	685.012	-1.71247	0.345761	-4.95274	7.32e-07	1.15e-05
ENSGALG00000001279_ZNF652	847.265	-1.28503	0.259481	-4.95231	7.33e-07	1.15e-05
ENSGALG00000038355_GDF5	27.2661	-6.15444	1.24303	-4.95117	7.38e-07	1.15e-05
ENSGALG00000029646_CNNM4	450.768	-1.57129	0.317685	-4.94608	7.57e-07	1.18e-05
ENSGALG00000041834_AEBP1	1086.58	-1.66304	0.336227	-4.94619	7.57e-07	1.18e-05
ENSGALG00000033919	154.828	-2.16313	0.437662	-4.94247	7.71e-07	1.2e-05
ENSGALG00000039205	126.696	-1.99819	0.404339	-4.94186	7.74e-07	1.2e-05
ENSGALG00000047347_Metazoa_SRP	104.332	2.95077	0.597254	4.94056	7.79e-07	1.21e-05
ENSGALG00000017394_INSIG1	810.69	1.48162	0.299999	4.93874	7.86e-07	1.22e-05
ENSGALG00000029343_TGM2	1989.48	1.3193	0.267138	4.93866	7.87e-07	1.22e-05
ENSGALG00000000708_NUCKS1	2112.49	-1.18857	0.240718	-4.93761	7.91e-07	1.23e-05
ENSGALG00000016943_OLFM4	2319.22	1.35599	0.274641	4.93731	7.92e-07	1.23e-05
ENSGALG00000035636_PHYH	444.3	1.6682	0.338146	4.93338	8.08e-07	1.25e-05
ENSGALG00000035761	106.866	2.26191	0.458828	4.92977	8.23e-07	1.27e-05
ENSGALG00000025907_ZBTB7A	474.754	-1.49888	0.304092	-4.92906	8.26e-07	1.28e-05
ENSGALG00000008222_SLC26A5	1089.69	-1.49447	0.303274	-4.92779	8.32e-07	1.28e-05
ENSGALG00000009560_MSMO1	998.444	1.38582	0.28122	4.92791	8.31e-07	1.28e-05
ENSGALG00000009422_RGS10	1018.54	-1.41238	0.286637	-4.92742	8.33e-07	1.28e-05
ENSGALG00000028567_MYL9	16480.5	-1.26768	0.257319	-4.9265	8.37e-07	1.29e-05
ENSGALG00000049484	73.4798	-2.57677	0.523072	-4.92622	8.38e-07	1.29e-05
ENSGALG00000043451_DNAL4	237.898	-1.64991	0.334962	-4.92567	8.41e-07	1.29e-05
ENSGALG00000005194_CD72	281.548	-2.21533	0.449798	-4.92518	8.43e-07	1.29e-05
ENSGALG00000013372_IL7R	1284.91	1.24351	0.252475	4.92529	8.42e-07	1.29e-05
ENSGALG00000002430_SMN	410.042	-1.60421	0.325737	-4.92488	8.44e-07	1.29e-05
ENSGALG00000016198_U2AF1	1184.22	-1.24028	0.251858	-4.92451	8.46e-07	1.29e-05
ENSGALG00000027207_PERP2	1167.49	2.00051	0.406352	4.9231	8.52e-07	1.3e-05
ENSGALG00000039535_D2HGDH	174.821	1.76667	0.358875	4.92281	8.53e-07	1.3e-05
ENSGALG00000000690_GDPD4	551.099	1.33036	0.270461	4.91886	8.7e-07	1.32e-05
ENSGALG00000029408_BAZ1B	3110.9	-1.29507	0.263276	-4.91906	8.7e-07	1.32e-05
ENSGALG00000043641_JUND	928.735	1.89615	0.385549	4.91805	8.74e-07	1.33e-05
ENSGALG00000019921_NDUFAF4	240.63	1.63581	0.332744	4.91611	8.83e-07	1.34e-05
ENSGALG00000003529_SYNC	321.358	-1.58395	0.322616	-4.9097	9.12e-07	1.38e-05
ENSGALG00000041556_GPATCH8	781.173	-1.52045	0.309848	-4.90709	9.24e-07	1.4e-05
ENSGALG00000036418_ANXA13	2123.7	1.71853	0.350318	4.90565	9.31e-07	1.41e-05
ENSGALG00000006132_MOSPD1	471.801	1.40776	0.287103	4.90332	9.42e-07	1.42e-05
ENSGALG00000051597	130.315	-2.06986	0.422356	-4.90076	9.55e-07	1.44e-05
ENSGALG00000049231_DNAJC22	995.527	1.80799	0.369186	4.89725	9.72e-07	1.47e-05
ENSGALG00000001093_TCF3	1111.23	-1.21922	0.249076	-4.89498	9.83e-07	1.48e-05
ENSGALG00000002605_MRPL17	738.063	1.42162	0.290428	4.89491	9.83e-07	1.48e-05
ENSGALG00000006061_RAP2C	663.817	-1.31521	0.268719	-4.89438	9.86e-07	1.48e-05
ENSGALG00000029921_CSRP2	432.768	-1.81244	0.370461	-4.8924	9.96e-07	1.5e-05
ENSGALG00000010494_SLC5A9	259.429	1.66306	0.339942	4.89217	9.97e-07	1.5e-05
ENSGALG00000049429	65.7504	2.69064	0.550053	4.8916	1e-06	1.5e-05
ENSGALG00000042505_DSEL	644.392	1.35888	0.277892	4.88996	1.01e-06	1.51e-05
ENSGALG00000007887_AAGAB	355.053	-1.43976	0.294483	-4.88909	1.01e-06	1.52e-05
ENSGALG00000010190_TBC1D15	1216.09	1.33222	0.272507	4.88877	1.01e-06	1.52e-05
ENSGALG00000046580_MGARP	43.6536	-3.05593	0.62517	-4.88816	1.02e-06	1.52e-05
ENSGALG00000035182_CMKLR1	142.508	-2.02477	0.41428	-4.88744	1.02e-06	1.52e-05
ENSGALG00000007685_BCL9L	983.688	-1.71479	0.351374	-4.88024	1.06e-06	1.58e-05
ENSGALG00000006604_KIF3B	445.924	-1.42856	0.292752	-4.87978	1.06e-06	1.58e-05
ENSGALG00000001189_NCF1C	180.148	-1.93794	0.397346	-4.87721	1.08e-06	1.6e-05
ENSGALG00000054718_FLNA	2975.59	-1.47646	0.302751	-4.87681	1.08e-06	1.6e-05
ENSGALG00000007766_KIAA1217	942.887	-1.77071	0.363394	-4.8727	1.1e-06	1.63e-05
ENSGALG00000044654_C22orf39	197.279	2.01509	0.413557	4.87258	1.1e-06	1.63e-05
ENSGALG00000000349_PSMC5	1629.04	-1.46945	0.301652	-4.87133	1.11e-06	1.64e-05
ENSGALG00000010084_EIF4G3	1928.92	-1.31987	0.270956	-4.87115	1.11e-06	1.64e-05
ENSGALG00000003670_MAFB	1076.99	-1.59563	0.327594	-4.87075	1.11e-06	1.64e-05
ENSGALG00000007641_LDB1	368.554	-1.83001	0.375705	-4.87087	1.11e-06	1.64e-05
ENSGALG00000041898_FAM43A	200.944	2.00889	0.412617	4.86866	1.12e-06	1.66e-05
ENSGALG00000038943_RASSF5	532.109	-1.68396	0.346098	-4.86556	1.14e-06	1.68e-05
ENSGALG00000012370_GINM1	1061.23	1.29794	0.266816	4.86457	1.15e-06	1.69e-05
ENSGALG00000003786_BRD7	1197.92	-1.21324	0.249716	-4.85848	1.18e-06	1.74e-05
ENSGALG00000041939_FAM222B	112.509	-2.41336	0.496868	-4.85714	1.19e-06	1.75e-05
ENSGALG00000048409_TXNIP	3996.28	-1.24072	0.255904	-4.84838	1.24e-06	1.83e-05
ENSGALG00000017156_DDX10	648.326	-1.36844	0.28228	-4.8478	1.25e-06	1.83e-05
ENSGALG00000003517_ZBTB8OS	476.887	-1.39785	0.28851	-4.84507	1.27e-06	1.85e-05
ENSGALG00000038745_LACTB2	876.199	1.33842	0.276533	4.84	1.3e-06	1.9e-05
ENSGALG00000036971_FGF12	103.91	-2.15535	0.445562	-4.83737	1.32e-06	1.92e-05
ENSGALG00000054496	397.324	-1.59248	0.329297	-4.83601	1.32e-06	1.94e-05
ENSGALG00000008648_UBE2A	1048.64	1.20775	0.249843	4.83404	1.34e-06	1.95e-05
ENSGALG00000030450_CLIP2	436.948	-1.58288	0.327478	-4.83357	1.34e-06	1.96e-05
ENSGALG00000047398	855.542	1.51808	0.314381	4.82878	1.37e-06	2e-05
ENSGALG00000006399_TLNRD1	258.485	-1.57787	0.32679	-4.82841	1.38e-06	2e-05
ENSGALG00000008318_SLK	2871.58	-1.13106	0.234266	-4.82811	1.38e-06	2e-05
ENSGALG00000037889_PTPRT	80.5441	-2.41879	0.501065	-4.8273	1.38e-06	2.01e-05
ENSGALG00000052156	345.913	1.9163	0.397175	4.82483	1.4e-06	2.03e-05
ENSGALG00000009958_ABCG8	239.893	2.12478	0.440581	4.82268	1.42e-06	2.05e-05
ENSGALG00000047320_MFAP5	419.84	-1.54314	0.319974	-4.82271	1.42e-06	2.05e-05
ENSGALG00000003108_SMG6	1027.88	-1.23099	0.25553	-4.81741	1.45e-06	2.1e-05
ENSGALG00000034456_PRELP	342.739	-2.09112	0.434195	-4.81609	1.46e-06	2.12e-05
ENSGALG00000035223_NDUFA6	364.908	1.7028	0.353772	4.81328	1.48e-06	2.14e-05
ENSGALG00000053353_BOP1	393.057	-1.66266	0.345481	-4.81259	1.49e-06	2.15e-05
ENSGALG00000043628_UBE2M	185.429	-1.77036	0.368045	-4.81018	1.51e-06	2.17e-05
ENSGALG00000026187_NMNAT3	112.798	2.06963	0.430779	4.80439	1.55e-06	2.23e-05
ENSGALG00000031890_YBX3	3743.62	-1.10203	0.229406	-4.80384	1.56e-06	2.24e-05
ENSGALG00000038102_TBRG4	324.929	-1.43396	0.298743	-4.79997	1.59e-06	2.28e-05
ENSGALG00000011341_UNC93A	44.0181	3.36857	0.70185	4.79955	1.59e-06	2.28e-05
ENSGALG00000013348_OTUD7B	278.348	-1.48744	0.310053	-4.79739	1.61e-06	2.31e-05
ENSGALG00000039221	379.449	-1.37554	0.286803	-4.79612	1.62e-06	2.32e-05
ENSGALG00000004115_DNAJA2	1980.19	-1.13638	0.237001	-4.79484	1.63e-06	2.33e-05
ENSGALG00000004620_LAMC1	6001.26	-1.35767	0.283151	-4.79485	1.63e-06	2.33e-05
ENSGALG00000001525	3034.79	1.28425	0.267863	4.79442	1.63e-06	2.33e-05
ENSGALG00000006568_TM9SF4	499.834	-1.43636	0.299645	-4.79352	1.64e-06	2.34e-05
ENSGALG00000020417_ISCA2	277.671	1.65676	0.345706	4.79241	1.65e-06	2.35e-05
ENSGALG00000041493	18.6929	-8.08871	1.68777	-4.79253	1.65e-06	2.35e-05
ENSGALG00000041795_WWP1	1189.73	1.25147	0.261187	4.79146	1.66e-06	2.36e-05
ENSGALG00000012798_SSR1	2438.83	1.21117	0.252898	4.78915	1.67e-06	2.38e-05
ENSGALG00000033862	1811.76	-1.25167	0.261528	-4.78599	1.7e-06	2.42e-05
ENSGALG00000047610	2179.54	-1.36877	0.286228	-4.78208	1.73e-06	2.46e-05
ENSGALG00000004625_ATXN2	954.604	-1.324	0.27695	-4.78065	1.75e-06	2.48e-05
ENSGALG00000012237_POLE2	363.91	1.62224	0.339466	4.77881	1.76e-06	2.5e-05
ENSGALG00000030084_EXOSC7	197.455	-1.61312	0.337662	-4.77731	1.78e-06	2.51e-05
ENSGALG00000046656_PMVK	136.75	-2.11675	0.443124	-4.77687	1.78e-06	2.52e-05
ENSGALG00000012628_HABP4	168.998	-1.67629	0.351066	-4.77485	1.8e-06	2.54e-05
ENSGALG00000045574_CAMK2N2	66.0291	-2.61359	0.547344	-4.77503	1.8e-06	2.54e-05
ENSGALG00000000218_SRP19	941.799	-1.26469	0.264965	-4.77307	1.81e-06	2.56e-05
ENSGALG00000006997_BRINP1	87.2685	-2.18994	0.45883	-4.77288	1.82e-06	2.56e-05
ENSGALG00000007241_NUBP1	308.836	1.58382	0.33191	4.77184	1.83e-06	2.57e-05
ENSGALG00000016300_TINAG	947.693	1.22003	0.255711	4.77115	1.83e-06	2.57e-05
ENSGALG00000039989_GPR160	194.068	1.69941	0.356217	4.77072	1.84e-06	2.58e-05
ENSGALG00000008931_COMMD1	442.029	1.50741	0.316052	4.76951	1.85e-06	2.59e-05
ENSGALG00000050829	34.0806	-3.94664	0.82835	-4.76446	1.89e-06	2.65e-05
ENSGALG00000052300	270.014	1.67771	0.352135	4.76441	1.89e-06	2.65e-05
ENSGALG00000032231_C4	291.566	1.63147	0.342592	4.76214	1.92e-06	2.68e-05
ENSGALG00000002666_RAB11FIP3	428.789	-1.36434	0.286581	-4.76072	1.93e-06	2.7e-05
ENSGALG00000016813_CHAMP1	912.207	-1.32942	0.279294	-4.75994	1.94e-06	2.7e-05
ENSGALG00000048399	90.9882	2.29717	0.482839	4.75764	1.96e-06	2.73e-05
ENSGALG00000052038_MBLAC1	76.2896	-2.35066	0.494369	-4.75487	1.99e-06	2.77e-05
ENSGALG00000029390_C15H12ORF65	289.318	-1.54675	0.32534	-4.75428	1.99e-06	2.77e-05
ENSGALG00000042894_SLC25A39	751.42	1.32439	0.278591	4.7539	2e-06	2.78e-05
ENSGALG00000041911_AAK1	351.851	-1.50907	0.317472	-4.7534	2e-06	2.78e-05
ENSGALG00000043823_ECSIT	218.608	1.74653	0.367421	4.75349	2e-06	2.78e-05
ENSGALG00000000540_GAS8	189.48	-1.6506	0.347444	-4.75068	2.03e-06	2.81e-05
ENSGALG00000016867_ITGBL1	73.5005	-2.35784	0.496917	-4.74493	2.09e-06	2.89e-05
ENSGALG00000010553_AIMP1	910.64	-1.26214	0.266216	-4.74103	2.13e-06	2.94e-05
ENSGALG00000047024_ZNF469	173.659	-1.77829	0.37516	-4.7401	2.14e-06	2.95e-05
ENSGALG00000054273_RASSF8	858.261	-1.20606	0.254565	-4.73773	2.16e-06	2.99e-05
ENSGALG00000009669_RSRC1	336.311	-1.4094	0.297634	-4.73535	2.19e-06	3.02e-05
ENSGALG00000015906_COX7A2	923.867	1.4165	0.299268	4.7332	2.21e-06	3.05e-05
ENSGALG00000032366_MEF2A	550.748	-1.34246	0.283771	-4.73079	2.24e-06	3.08e-05
ENSGALG00000002643	120.059	-1.93302	0.408797	-4.72855	2.26e-06	3.11e-05
ENSGALG00000007012_ARRDC4	978.162	-1.31265	0.277731	-4.72634	2.29e-06	3.14e-05
ENSGALG00000010187_SLC1A1	2708.8	1.21605	0.257543	4.72174	2.34e-06	3.21e-05
ENSGALG00000047953	84.5203	-2.36242	0.500317	-4.72184	2.34e-06	3.21e-05
ENSGALG00000045809	3257.24	1.54475	0.327179	4.72143	2.34e-06	3.21e-05
ENSGALG00000005986_TUB	876.821	-1.27394	0.26992	-4.71971	2.36e-06	3.24e-05
ENSGALG00000016506_ZNF512	401.816	-1.36862	0.290102	-4.71773	2.38e-06	3.26e-05
ENSGALG00000037378_RPRM	17.7264	-7.9627	1.68776	-4.71791	2.38e-06	3.26e-05
ENSGALG00000000122_GNB2L1	9585.2	1.09343	0.231832	4.71648	2.4e-06	3.28e-05
ENSGALG00000008403_PHF21A	783.006	-1.33364	0.282755	-4.71658	2.4e-06	3.28e-05
ENSGALG00000034216_TK2	164.71	-1.76991	0.375754	-4.71029	2.47e-06	3.37e-05
ENSGALG00000004889_SLC2A1	434.794	-1.50743	0.320084	-4.70947	2.48e-06	3.38e-05
ENSGALG00000015195_RPS15	5973.14	1.44693	0.307336	4.70796	2.5e-06	3.41e-05
ENSGALG00000027435_MED21	190.398	1.70117	0.361422	4.70687	2.52e-06	3.42e-05
ENSGALG00000008676_RRBP1	2177.12	-1.11521	0.237155	-4.70245	2.57e-06	3.49e-05
ENSGALG00000041505_PRRC2B	2952.57	-1.38047	0.293638	-4.70126	2.59e-06	3.51e-05
ENSGALG00000051144_EVI5L	590.212	-1.30778	0.278186	-4.70111	2.59e-06	3.51e-05
ENSGALG00000011046_SNX10	474.042	1.46846	0.312436	4.70002	2.6e-06	3.53e-05
ENSGALG00000026229_PIGY	142.966	1.90017	0.404325	4.69961	2.61e-06	3.53e-05
ENSGALG00000015356_IFT57	191.298	-1.76036	0.374685	-4.69825	2.62e-06	3.55e-05
ENSGALG00000034855_HK2	1806.49	-1.23723	0.263476	-4.69581	2.66e-06	3.59e-05
ENSGALG00000007381	240.461	-1.70907	0.364028	-4.69489	2.67e-06	3.6e-05
ENSGALG00000014554	75.9614	-2.87297	0.611956	-4.69474	2.67e-06	3.6e-05
ENSGALG00000048887	51.4705	-2.91277	0.620437	-4.6947	2.67e-06	3.6e-05
ENSGALG00000010547_YIPF4	1030.46	1.17719	0.250863	4.69256	2.7e-06	3.63e-05
ENSGALG00000005138_KCTD10	459.883	-1.37313	0.292685	-4.69148	2.71e-06	3.64e-05
ENSGALG00000007512_MORC2	801.673	-1.26474	0.269577	-4.69159	2.71e-06	3.64e-05
ENSGALG00000054619_GAB2	114.896	-2.06515	0.440185	-4.69156	2.71e-06	3.64e-05
ENSGALG00000036935	459.141	-1.62063	0.345568	-4.68977	2.74e-06	3.67e-05
ENSGALG00000012464_SOUL	94.1129	-2.54793	0.543333	-4.68945	2.74e-06	3.67e-05
ENSGALG00000053274_PPP1R14B	245.767	-1.74211	0.371503	-4.68936	2.74e-06	3.67e-05
ENSGALG00000042538_BAIAP2	139.702	-1.93765	0.413395	-4.68716	2.77e-06	3.71e-05
ENSGALG00000013708_CYB5A	2836.14	-1.1231	0.239632	-4.68676	2.78e-06	3.71e-05
ENSGALG00000005610_SLC44A3	726.727	1.23578	0.263702	4.68629	2.78e-06	3.72e-05
ENSGALG00000033320	440.536	1.34515	0.287116	4.68503	2.8e-06	3.74e-05
ENSGALG00000051206	202.576	-1.63134	0.34823	-4.68465	2.8e-06	3.74e-05
ENSGALG00000035079_RPSAP58	18179.8	-1.24399	0.265688	-4.68214	2.84e-06	3.78e-05
ENSGALG00000035184_SDC3	283.298	-1.51448	0.323602	-4.68008	2.87e-06	3.82e-05
ENSGALG00000002759_PEAK1	2348.2	-1.34565	0.287552	-4.67968	2.87e-06	3.82e-05
ENSGALG00000010812_RYR2	4050.08	-1.5413	0.329419	-4.67884	2.89e-06	3.83e-05
ENSGALG00000011630_GLI2	456.477	-1.6046	0.342953	-4.67878	2.89e-06	3.83e-05
ENSGALG00000002644_RPL10A	6708.72	1.23132	0.263184	4.67856	2.89e-06	3.83e-05
ENSGALG00000005888_PGP	385.282	1.38455	0.295955	4.67824	2.89e-06	3.83e-05
ENSGALG00000025755_SPTSSA	719.956	1.23797	0.264778	4.67553	2.93e-06	3.88e-05
ENSGALG00000030261_SMIM12	405.348	1.5281	0.326933	4.67405	2.95e-06	3.91e-05
ENSGALG00000040783_MAP4	2060.09	-1.41097	0.301911	-4.67346	2.96e-06	3.91e-05
ENSGALG00000015263	556.993	1.52686	0.326724	4.67323	2.96e-06	3.91e-05
ENSGALG00000001634_RPL23	7640.32	-1.28315	0.274624	-4.67238	2.98e-06	3.93e-05
ENSGALG00000038421_RWDD3	387.274	1.37704	0.294941	4.66886	3.03e-06	3.99e-05
ENSGALG00000026221_ENDOG	199.647	1.64117	0.351539	4.66852	3.03e-06	3.99e-05
ENSGALG00000014867_PAIP1	1039.26	1.17191	0.251188	4.66547	3.08e-06	4.05e-05
ENSGALG00000046858_MOGS	424.542	1.52064	0.326221	4.66139	3.14e-06	4.13e-05
ENSGALG00000010924_NFIA	1476.77	-1.44901	0.310872	-4.66112	3.14e-06	4.13e-05
ENSGALG00000036993_RNF214	267.531	-1.45202	0.311564	-4.66044	3.16e-06	4.14e-05
ENSGALG00000009724_GREM1	634.334	-1.59122	0.341599	-4.65815	3.19e-06	4.18e-05
ENSGALG00000043456_SMIM7	592.282	1.2986	0.278805	4.65773	3.2e-06	4.19e-05
ENSGALG00000009070_HSPE1	1495.42	1.25327	0.269089	4.65744	3.2e-06	4.19e-05
ENSGALG00000015916_SLC17A5	1495.2	1.2545	0.269477	4.65529	3.24e-06	4.23e-05
ENSGALG00000001565_C5	153.38	1.79585	0.385823	4.65459	3.25e-06	4.24e-05
ENSGALG00000015645_GRK4	372.821	-1.52692	0.328106	-4.65375	3.26e-06	4.25e-05
ENSGALG00000042641_PATL1	238.583	-1.65414	0.35543	-4.65391	3.26e-06	4.25e-05
ENSGALG00000002725_UAP1	277.941	-1.50971	0.324542	-4.6518	3.29e-06	4.29e-05
ENSGALG00000009544_ZCRB1	727.113	-1.29305	0.277975	-4.65169	3.29e-06	4.29e-05
ENSGALG00000046794	129.019	1.88397	0.405239	4.64904	3.33e-06	4.34e-05
ENSGALG00000007537_INCENP	328.842	-1.41324	0.304017	-4.64855	3.34e-06	4.34e-05
ENSGALG00000008405_RALBP1	1895.42	-1.14361	0.246049	-4.6479	3.35e-06	4.35e-05
ENSGALG00000033260_ST3GAL5	943.136	1.38802	0.298659	4.64748	3.36e-06	4.36e-05
ENSGALG00000052645	29.0114	-3.67847	0.792106	-4.64391	3.42e-06	4.43e-05
ENSGALG00000003429_PBX1	644.571	-1.63023	0.351202	-4.64187	3.45e-06	4.47e-05
[truncated: 3,128 more rows]

## Sheet: GO Results - Jejunum vs Ileum
Supplemental Table 6
[truncated: 15 more rows]

## Sheet: GO Results - Jejunum vs Proxima
Supplemental Table 6
[truncated: 139 more rows]

## Sheet: GO Results - Ileum vs Proximal 
Supplemental Table 6
[truncated: 87 more rows]
