# Supplementary material for: Transcriptomes of an Array of Chicken Ovary, Intestinal, and Immune Cells and Tissues
Source: Front Genet. 2021 Jun 30;12:664424. doi: 10.3389/fgene.2021.664424 (PMC8278112; doi:10.3389/fgene.2021.664424)
Supplement: Supplementary Table 9 — Immune pathway results. (Sheet 1) B cell vs. monocyte WebGestalt (pathway) results. (Sheet 2) B Cell vs. bursa WebGestalt (pathway) results. (Sheet 3) Bursa vs. thymus WebGestalt (pathway) results. [file Table_9.XLSX]

## Sheet: B Cell vs Monocyte
Supplemental Table 9
Sheet 1: B Cell vs Monocyte WebGestalt (Pathway) Results
geneSet	description	link	size	overlap	expect	enrichmentRatio	pValue	FDR	overlapId	userId
gga04142	Lysosome	http://www.kegg.jp/kegg-bin/show_pathway?gga04142+100857525+100858592+100859261+101752092+107050229+107055308+374125+395272+395472+395474+395602+395811+396220+396329+396547+414800+415320+415674+416462+416577+416753+416834+417021+417606+417829+418096+418621+419014+419077+419311+419552+419681+420210+420720+421076+421863+421959+422081+422188+422392+422490+422558+422638+422712+422727+423353+423418+42…	110	65	33.5597	1.93685	3.28e-10	5.35e-08	100857525;100858592;100859261;101752092;107050229;107055308;374125;395272;395472;395474;395602;395811;396220;396329;396547;414800;415320;415674;416462;416577;416753;416834;417021;417606;417829;418096;418621;419014;419077;419311;419552;419681;420210;420720;421076;421863;421959;422081;422188;422392;422490;422558;422638;422712;422727;423353;423418;424540;424575;424961;425657;426049;426164;426199;426…	ENSGALG00000011499;ENSGALG00000008759;ENSGALG00000011434;ENSGALG00000010237;ENSGALG00000003936;ENSGALG00000004769;ENSGALG00000008836;ENSGALG00000026364;ENSGALG00000007462;ENSGALG00000016917;ENSGALG00000004948;ENSGALG00000043828;ENSGALG00000037697;ENSGALG00000028790;ENSGALG00000016479;ENSGALG00000006876;ENSGALG00000038636;ENSGALG00000002542;ENSGALG00000034328;ENSGALG00000010091;ENSGALG00000004438;…
gga00531	Glycosaminoglycan degradation	http://www.kegg.jp/kegg-bin/show_pathway?gga00531+100859903+107055308+373981+415320+415908+417829+420720+422081+422392+422490+426739+427204+427823+771459	18	14	5.49159	2.54935	4.71e-05	0.00383684	100859903;107055308;373981;415320;415908;417829;420720;422081;422392;422490;426739;427204;427823;771459	ENSGALG00000043828;ENSGALG00000002542;ENSGALG00000004438;ENSGALG00000010136;ENSGALG00000000785;ENSGALG00000007027;ENSGALG00000029000;ENSGALG00000011203;ENSGALG00000009154;ENSGALG00000040028;ENSGALG00000002138;ENSGALG00000032610;ENSGALG00000009856;ENSGALG00000014933
gga04217	Necroptosis	http://www.kegg.jp/kegg-bin/show_pathway?gga04217+100008585+101749238+374012+374055+374072+378909+378921+395196+395274+395556+395664+395724+395845+395858+395963+395970+395983+396188+396199+396240+396282+396394+396489+415725+415841+416320+416789+417241+417253+417955+418132+418325+418461+418502+418581+418958+419077+419535+420027+420201+420901+421248+421684+422143+422546+422592+422720+422918+423146+…	128	59	39.0513	1.51083	0.000123	0.00667418	100008585;101749238;374012;374055;374072;378909;378921;395196;395274;395556;395664;395724;395845;395858;395963;395970;395983;396188;396199;396240;396282;396394;396489;415725;415841;416320;416789;417241;417253;417955;418132;418325;418461;418502;418581;418958;419077;419535;420027;420201;420901;421248;421684;422143;422546;422592;422720;422918;423146;423463;423721;423737;423778;424629;426793;427881;4…	ENSGALG00000033234;ENSGALG00000009864;ENSGALG00000039461;ENSGALG00000029940;ENSGALG00000008518;ENSGALG00000006503;ENSGALG00000033087;ENSGALG00000007220;ENSGALG00000043573;ENSGALG00000005065;ENSGALG00000012885;ENSGALG00000009228;ENSGALG00000012365;ENSGALG00000013861;ENSGALG00000010614;ENSGALG00000009360;ENSGALG00000026428;ENSGALG00000007001;ENSGALG00000036106;ENSGALG00000006161;ENSGALG00000043754;…
gga04144	Endocytosis	http://www.kegg.jp/kegg-bin/show_pathway?gga04144+100858913+100859290+100859707+100859860+374038+374094+395132+395197+395201+395247+395272+395294+395324+395889+396191+396399+415451+415526+415544+415841+415877+416016+416051+416196+416487+416718+416835+416837+416867+416904+416931+417197+417217+417525+417771+417772+417896+418043+418094+418224+418406+418461+418883+419352+419420+419535+419589+419738+4…	224	92	68.3398	1.34621	0.000382	0.0155538	100858913;100859290;100859707;100859860;374038;374094;395132;395197;395201;395247;395272;395294;395324;395889;396191;396399;415451;415526;415544;415841;415877;416016;416051;416196;416487;416718;416835;416837;416867;416904;416931;417197;417217;417525;417771;417772;417896;418043;418094;418224;418406;418461;418883;419352;419420;419535;419589;419738;419990;420063;420201;420212;420226;420334;420398;42…	ENSGALG00000037077;ENSGALG00000042471;ENSGALG00000007125;ENSGALG00000035701;ENSGALG00000012357;ENSGALG00000003743;ENSGALG00000015351;ENSGALG00000034085;ENSGALG00000003803;ENSGALG00000033295;ENSGALG00000004852;ENSGALG00000043573;ENSGALG00000012472;ENSGALG00000002189;ENSGALG00000015304;ENSGALG00000023279;ENSGALG00000009364;ENSGALG00000011442;ENSGALG00000012052;ENSGALG00000041795;ENSGALG00000006045;…
gga04145	Phagosome	http://www.kegg.jp/kegg-bin/show_pathway?gga04145+100857227+100857247+100859840+101747454+374058+374141+395142+395197+395472+395474+395488+395821+396181+396191+396220+396370+396526+404304+414800+415674+416016+416023+416288+416753+417050+417051+417241+417249+417467+417896+418162+418581+420210+420515+420997+421037+421061+421939+423280+424114+424151+424575+425657+426199+426369+426930+427466+427727+4…	127	56	38.7462	1.4453	0.000729	0.0192197	100857227;100857247;100859840;101747454;374058;374141;395142;395197;395472;395474;395488;395821;396181;396191;396220;396370;396526;404304;414800;415674;416016;416023;416288;416753;417050;417051;417241;417249;417467;417896;418162;418581;420210;420515;420997;421037;421061;421939;423280;424114;424151;424575;425657;426199;426369;426930;427466;427727;427854;428421;428675;769014;769300;771876;771888;77…	ENSGALG00000008638;ENSGALG00000028304;ENSGALG00000029766;ENSGALG00000034722;ENSGALG00000034722;ENSGALG00000028357;ENSGALG00000011149;ENSGALG00000027765;ENSGALG00000008836;ENSGALG00000031275;ENSGALG00000030038;ENSGALG00000037697;ENSGALG00000000433;ENSGALG00000000723;ENSGALG00000010091;ENSGALG00000016446;ENSGALG00000000775;ENSGALG00000012119;ENSGALG00000003256;ENSGALG00000014800;ENSGALG00000013621;…
gga00480	Glutathione metabolism	http://www.kegg.jp/kegg-bin/show_pathway?gga00480+100857115+395667+395976+396322+396380+414895+414896+418178+418302+418602+419081+419450+421937+423209+423881+424112+424404+425306+431056+769847+771447+771783+772208+776932	44	24	13.4239	1.78786	0.000733	0.0192197	100857115;395667;395976;396322;396380;414895;414896;418178;418302;418602;419081;419450;421937;423209;423881;424112;424404;425306;431056;769847;771447;771783;772208;776932	ENSGALG00000016325;ENSGALG00000013098;ENSGALG00000016328;ENSGALG00000008818;ENSGALG00000008409;ENSGALG00000010569;ENSGALG00000005204;ENSGALG00000002797;ENSGALG00000028204;ENSGALG00000003039;ENSGALG00000027874;ENSGALG00000014708;ENSGALG00000006334;ENSGALG00000032922;ENSGALG00000016379;ENSGALG00000037781;ENSGALG00000006344;ENSGALG00000033857;ENSGALG00000034434;ENSGALG00000017350;ENSGALG00000016322;…
gga01100	Metabolic pathways	http://www.kegg.jp/kegg-bin/show_pathway?gga01100+100533998+100857134+100857596+100857898+100858021+100858145+100858205+100858627+100858798+100859320+100859720+100859903+101747962+107050229+107055308+373889+373900+373916+373981+373997+374009+374030+374033+374066+374189+374193+378907+378909+395139+395206+395218+395270+395338+395415+395472+395474+395480+395492+395650+395653+395667+395689+395694+395…	1155	396	352.377	1.1238	0.000825	0.0192197	100533998;100857134;100857596;100857898;100858021;100858145;100858205;100858627;100858798;100859320;100859720;100859903;101747962;107050229;107055308;373889;373900;373916;373981;373997;374009;374030;374033;374066;374189;374193;378907;378909;395139;395206;395218;395270;395338;395415;395472;395474;395480;395492;395650;395653;395667;395689;395694;395719;395758;395785;395807;395821;395833;395929;3960…	ENSGALG00000023689;ENSGALG00000032763;ENSGALG00000002576;ENSGALG00000004436;ENSGALG00000013072;ENSGALG00000039705;ENSGALG00000008518;ENSGALG00000008795;ENSGALG00000037043;ENSGALG00000014508;ENSGALG00000015331;ENSGALG00000008701;ENSGALG00000004763;ENSGALG00000002492;ENSGALG00000002024;ENSGALG00000016471;ENSGALG00000003936;ENSGALG00000008603;ENSGALG00000015833;ENSGALG00000036743;ENSGALG00000012260;…

## Sheet: B Cell vs Bursa
Supplemental Table 9
Sheet 2: B Cell vs Bursa WebGestalt (Pathway) Results
geneSet	description	link	size	overlap	expect	enrichmentRatio	pValue	FDR	overlapId	userId
gga04110	Cell cycle	http://www.kegg.jp/kegg-bin/show_pathway?gga04110+100529062+100859853+373984+374047+374260+378914+378922+395076+395132+395188+395609+396142+396167+396172+396252+396438+415400+415749+416027+416158+416319+416575+416776+417554+417714+418000+418058+419126+420206+420231+420286+420332+420375+420536+420558+421226+421352+421822+421849+422043+422675+422805+423949+424077+424295+424507+424563+424640+424735+…	114	60	39.5021	1.51891	5.07e-05	0.0082705	100529062;100859853;373984;374047;374260;378914;378922;395076;395132;395188;395609;396142;396167;396172;396252;396438;415400;415749;416027;416158;416319;416575;416776;417554;417714;418000;418058;419126;420206;420231;420286;420332;420375;420536;420558;421226;421352;421822;421849;422043;422675;422805;423949;424077;424295;424507;424563;424640;424735;424777;424780;425536;426764;427328;427437;427658;4…	ENSGALG00000008233;ENSGALG00000033631;ENSGALG00000001616;ENSGALG00000025810;ENSGALG00000035701;ENSGALG00000042418;ENSGALG00000004161;ENSGALG00000011881;ENSGALG00000006110;ENSGALG00000006051;ENSGALG00000003085;ENSGALG00000010623;ENSGALG00000001332;ENSGALG00000029968;ENSGALG00000016676;ENSGALG00000036892;ENSGALG00000015874;ENSGALG00000010537;ENSGALG00000025759;ENSGALG00000029292;ENSGALG00000012546;…
gga03030	DNA replication	http://www.kegg.jp/kegg-bin/show_pathway?gga03030+100859719+373984+416027+416997+417275+417563+418058+418593+418907+419053+419566+421878+422043+422788+423688+424295+424958+426646+426764+430516+769677	31	21	10.7418	1.95498	0.000169	0.0137503	100859719;373984;416027;416997;417275;417563;418058;418593;418907;419053;419566;421878;422043;422788;423688;424295;424958;426646;426764;430516;769677	ENSGALG00000033781;ENSGALG00000007665;ENSGALG00000004037;ENSGALG00000016676;ENSGALG00000008873;ENSGALG00000043938;ENSGALG00000029292;ENSGALG00000012546;ENSGALG00000014298;ENSGALG00000016278;ENSGALG00000006037;ENSGALG00000017064;ENSGALG00000003072;ENSGALG00000016312;ENSGALG00000012915;ENSGALG00000026517;ENSGALG00000000734;ENSGALG00000008703;ENSGALG00000017307;ENSGALG00000041973;ENSGALG00000012348

## Sheet: Bursa vs Thymus
Supplemental Table 9
Sheet 3: Bursa vs Thymus WebGestalt (Pathway) Results
geneSet	description	link	size	overlap	expect	enrichmentRatio	pValue	FDR	overlapId	userId
gga04110	Cell cycle	http://www.kegg.jp/kegg-bin/show_pathway?gga04110+100529062+100873157+373961+373984+374047+374260+378922+395132+395247+395376+396142+396167+396172+396252+396341+396438+415400+415749+416027+416158+416319+416575+416776+416842+417258+417714+418001+418058+418735+419126+419190+419960+420206+420231+420332+420375+420558+420824+421226+421228+421849+422043+423045+423949+424077+424295+424307+424563+424640+…	114	56	28.6438	1.95505	1.96e-08	3.2e-06	100529062;100873157;373961;373984;374047;374260;378922;395132;395247;395376;396142;396167;396172;396252;396341;396438;415400;415749;416027;416158;416319;416575;416776;416842;417258;417714;418001;418058;418735;419126;419190;419960;420206;420231;420332;420375;420558;420824;421226;421228;421849;422043;423045;423949;424077;424295;424307;424563;424640;425536;425619;426764;427437;693255;769430;771294	ENSGALG00000010623;ENSGALG00000007555;ENSGALG00000035701;ENSGALG00000038915;ENSGALG00000006474;ENSGALG00000001722;ENSGALG00000006110;ENSGALG00000009971;ENSGALG00000040794;ENSGALG00000001506;ENSGALG00000012546;ENSGALG00000029292;ENSGALG00000042418;ENSGALG00000011881;ENSGALG00000001616;ENSGALG00000012915;ENSGALG00000016676;ENSGALG00000008234;ENSGALG00000008233;ENSGALG00000003085;ENSGALG00000010346;…
gga03030	DNA replication	http://www.kegg.jp/kegg-bin/show_pathway?gga03030+100859719+107057377+373984+396542+416027+416997+417275+417563+418058+418874+418907+419566+421878+422043+422788+423688+424295+424958+426764+430516+769677	31	21	7.78911	2.69607	6.64e-07	5.41e-05	100859719;107057377;373984;396542;416027;416997;417275;417563;418058;418874;418907;419566;421878;422043;422788;423688;424295;424958;426764;430516;769677	ENSGALG00000026517;ENSGALG00000014298;ENSGALG00000012546;ENSGALG00000029292;ENSGALG00000017064;ENSGALG00000007665;ENSGALG00000033781;ENSGALG00000012915;ENSGALG00000016676;ENSGALG00000000734;ENSGALG00000008703;ENSGALG00000029449;ENSGALG00000012348;ENSGALG00000004037;ENSGALG00000043938;ENSGALG00000017015;ENSGALG00000016278;ENSGALG00000037932;ENSGALG00000006037;ENSGALG00000008873;ENSGALG00000003072
gga04218	Cellular senescence	http://www.kegg.jp/kegg-bin/show_pathway?gga04218+100529062+100873157+101751828+374047+374072+374138+374231+374260+378804+395132+395247+395498+395658+395895+395928+395963+396019+396142+396167+396172+396235+396252+396258+396341+396399+396438+415400+415711+416320+416329+416496+416692+417445+417739+419126+419346+419444+419844+419847+419910+420206+420231+420332+420375+420558+420790+420824+421752+4217…	141	61	35.4279	1.72181	1.41e-06	7.64e-05	100529062;100873157;101751828;374047;374072;374138;374231;374260;378804;395132;395247;395498;395658;395895;395928;395963;396019;396142;396167;396172;396235;396252;396258;396341;396399;396438;415400;415711;416320;416329;416496;416692;417445;417739;419126;419346;419444;419844;419847;419910;420206;420231;420332;420375;420558;420790;420824;421752;421769;422546;423062;424826;425389;426773;427171;43053…	ENSGALG00000003503;ENSGALG00000005505;ENSGALG00000015297;ENSGALG00000007555;ENSGALG00000017034;ENSGALG00000014786;ENSGALG00000006503;ENSGALG00000035701;ENSGALG00000038915;ENSGALG00000007963;ENSGALG00000001143;ENSGALG00000008675;ENSGALG00000001722;ENSGALG00000003396;ENSGALG00000011620;ENSGALG00000038943;ENSGALG00000008424;ENSGALG00000002583;ENSGALG00000040794;ENSGALG00000041285;ENSGALG00000033932;…
gga04115	p53 signaling pathway	http://www.kegg.jp/kegg-bin/show_pathway?gga04115+100529062+100858796+374047+374260+395236+395476+396252+396282+396341+415400+417644+419382+419711+419946+420231+420253+420558+420624+420790+421683+421766+421936+422211+422512+423172+423185+425204+428089+693255+770077+771726	65	31	16.332	1.89811	6.23e-05	0.00254009	100529062;100858796;374047;374260;395236;395476;396252;396282;396341;415400;417644;419382;419711;419946;420231;420253;420558;420624;420790;421683;421766;421936;422211;422512;423172;423185;425204;428089;693255;770077;771726	ENSGALG00000040921;ENSGALG00000007555;ENSGALG00000012885;ENSGALG00000015286;ENSGALG00000010638;ENSGALG00000035325;ENSGALG00000027536;ENSGALG00000001006;ENSGALG00000040794;ENSGALG00000013039;ENSGALG00000035610;ENSGALG00000042418;ENSGALG00000008218;ENSGALG00000003085;ENSGALG00000025977;ENSGALG00000016442;ENSGALG00000004161;ENSGALG00000038217;ENSGALG00000032699;ENSGALG00000011020;ENSGALG00000017204;…
gga04070	Phosphatidylinositol signaling system	http://www.kegg.jp/kegg-bin/show_pathway?gga04070+100859723+101748037+101751177+395694+415587+415805+416010+416567+416692+416743+418498+418690+418992+419175+419444+419609+419822+419908+419910+420199+420221+420504+421132+422129+422387+422388+422454+422807+423014+423197+423932+423973+424114+424747+424826+427171+427381+428692+771549	91	39	22.8648	1.70568	0.000144	0.00470932	100859723;101748037;101751177;395694;415587;415805;416010;416567;416692;416743;418498;418690;418992;419175;419444;419609;419822;419908;419910;420199;420221;420504;421132;422129;422387;422388;422454;422807;423014;423197;423932;423973;424114;424747;424826;427171;427381;428692;771549	ENSGALG00000003750;ENSGALG00000033507;ENSGALG00000037043;ENSGALG00000005505;ENSGALG00000004336;ENSGALG00000008842;ENSGALG00000042105;ENSGALG00000034487;ENSGALG00000014786;ENSGALG00000029709;ENSGALG00000037943;ENSGALG00000005701;ENSGALG00000008424;ENSGALG00000002583;ENSGALG00000009880;ENSGALG00000009068;ENSGALG00000009445;ENSGALG00000001730;ENSGALG00000003149;ENSGALG00000008603;ENSGALG00000034317;…
gga03430	Mismatch repair	http://www.kegg.jp/kegg-bin/show_pathway?gga03430+100859719+101752182+107057377+373984+378799+396542+417563+418907+419566+421291+422788+424958+430516	20	13	5.02523	2.58695	0.000188	0.00510042	100859719;101752182;107057377;373984;378799;396542;417563;418907;419566;421291;422788;424958;430516	ENSGALG00000026517;ENSGALG00000014298;ENSGALG00000029292;ENSGALG00000017064;ENSGALG00000000734;ENSGALG00000008703;ENSGALG00000029449;ENSGALG00000003430;ENSGALG00000008957;ENSGALG00000043938;ENSGALG00000008962;ENSGALG00000037932;ENSGALG00000003072
gga04068	FoxO signaling pathway	http://www.kegg.jp/kegg-bin/show_pathway?gga04068+100529062+100873157+374047+374231+378894+386572+395126+395132+395247+395889+395928+395983+396110+396167+396239+396341+396399+396438+396458+415400+415458+416575+416986+417669+417739+419444+420027+420148+420167+420343+420435+421769+422497+422512+423164+423165+423572+423600+423778+424586+424826+424912+426054+427150+427171+427437+693255	123	47	30.9052	1.52078	0.000793	0.0162104	100529062;100873157;374047;374231;378894;386572;395126;395132;395247;395889;395928;395983;396110;396167;396239;396341;396399;396438;396458;415400;415458;416575;416986;417669;417739;419444;420027;420148;420167;420343;420435;421769;422497;422512;423164;423165;423572;423600;423778;424586;424826;424912;426054;427150;427171;427437;693255	ENSGALG00000007938;ENSGALG00000010129;ENSGALG00000009179;ENSGALG00000046408;ENSGALG00000005505;ENSGALG00000015297;ENSGALG00000007555;ENSGALG00000006219;ENSGALG00000007357;ENSGALG00000017034;ENSGALG00000040651;ENSGALG00000014786;ENSGALG00000035701;ENSGALG00000006110;ENSGALG00000011620;ENSGALG00000002583;ENSGALG00000043570;ENSGALG00000010346;ENSGALG00000025977;ENSGALG00000013372;ENSGALG00000004161;…
gga03420	Nucleotide excision repair	http://www.kegg.jp/kegg-bin/show_pathway?gga03420+100859719+107057377+373984+374050+396542+416039+416997+417275+417563+418001+418907+419566+422788+423185+423785+424958+428019+430516+771294	38	19	9.54794	1.98996	0.000796	0.0162104	100859719;107057377;373984;374050;396542;416039;416997;417275;417563;418001;418907;419566;422788;423185;423785;424958;428019;430516;771294	ENSGALG00000006254;ENSGALG00000026517;ENSGALG00000014298;ENSGALG00000029292;ENSGALG00000017064;ENSGALG00000008218;ENSGALG00000007665;ENSGALG00000000734;ENSGALG00000008703;ENSGALG00000029449;ENSGALG00000006357;ENSGALG00000042333;ENSGALG00000043938;ENSGALG00000037932;ENSGALG00000011993;ENSGALG00000016860;ENSGALG00000014790;ENSGALG00000008873;ENSGALG00000003072
gga03460	Fanconi anemia pathway	http://www.kegg.jp/kegg-bin/show_pathway?gga03460+100857997+101752182+373983+374139+395102+396086+415383+415491+415577+415854+415935+415949+416517+416665+417563+418628+419566+421149+421202+422104+424685+427468+428622	50	23	12.5631	1.83076	0.00103028	0.0186595	100857997;101752182;373983;374139;395102;396086;415383;415491;415577;415854;415935;415949;416517;416665;417563;418628;419566;421149;421202;422104;424685;427468;428622	ENSGALG00000017073;ENSGALG00000010317;ENSGALG00000031841;ENSGALG00000004670;ENSGALG00000015033;ENSGALG00000000102;ENSGALG00000000734;ENSGALG00000003720;ENSGALG00000003430;ENSGALG00000030022;ENSGALG00000016569;ENSGALG00000002781;ENSGALG00000044177;ENSGALG00000008256;ENSGALG00000012618;ENSGALG00000030313;ENSGALG00000031182;ENSGALG00000010957;ENSGALG00000006658;ENSGALG00000000516;ENSGALG00000007676;…
gga03050	Proteasome	http://www.kegg.jp/kegg-bin/show_pathway?gga03050+395804+415869+416079+417425+418925+419630+420017+420772+421551+423542+424189+424926+425294+426133+426937+429986+772237	35	17	8.79415	1.9331	0.00223307	0.0308128	395804;415869;416079;417425;418925;419630;420017;420772;421551;423542;424189;424926;425294;426133;426937;429986;772237	ENSGALG00000039387;ENSGALG00000000707;ENSGALG00000039624;ENSGALG00000007664;ENSGALG00000026421;ENSGALG00000011174;ENSGALG00000012039;ENSGALG00000011128;ENSGALG00000002937;ENSGALG00000006294;ENSGALG00000033162;ENSGALG00000017090;ENSGALG00000026225;ENSGALG00000000905;ENSGALG00000007315;ENSGALG00000009733;ENSGALG00000010675
gga04672	Intestinal immune network for IgA production	http://www.kegg.jp/kegg-bin/show_pathway?gga04672+100858236+100873157+101747454+374229+395180+395324+395385+395485+396249+417983+418257+419848+424105+424121+427944+693256+770275	35	17	8.79415	1.9331	0.00223307	0.0308128	100858236;100873157;101747454;374229;395180;395324;395385;395485;396249;417983;418257;419848;424105;424121;427944;693256;770275	ENSGALG00000008669;ENSGALG00000014280;ENSGALG00000016852;ENSGALG00000041577;ENSGALG00000019322;ENSGALG00000028341;ENSGALG00000008656;ENSGALG00000006415;ENSGALG00000030940;ENSGALG00000041346;ENSGALG00000007015;ENSGALG00000024122;ENSGALG00000000141;ENSGALG00000000919;ENSGALG00000031325;ENSGALG00000012357;ENSGALG00000014362
gga03440	Homologous recombination	http://www.kegg.jp/kegg-bin/show_pathway?gga03440+107057377+373983+374139+395449+396086+415577+416329+416517+417563+418097+419566+420694+421071+422104+423485+424010+424611+772237	38	18	9.54794	1.88522	0.00238122	0.0308128	107057377;373983;374139;395449;396086;415577;416329;416517;417563;418097;419566;420694;421071;422104;423485;424010;424611;772237	ENSGALG00000012766;ENSGALG00000017073;ENSGALG00000010356;ENSGALG00000043597;ENSGALG00000000734;ENSGALG00000014982;ENSGALG00000002781;ENSGALG00000011533;ENSGALG00000003484;ENSGALG00000008256;ENSGALG00000030313;ENSGALG00000034461;ENSGALG00000037932;ENSGALG00000007676;ENSGALG00000006794;ENSGALG00000005028;ENSGALG00000003072;ENSGALG00000009733
gga00562	Inositol phosphate metabolism	http://www.kegg.jp/kegg-bin/show_pathway?gga00562+100859723+101751177+395694+415805+416743+417706+418498+418690+418992+419175+419444+419609+419822+420199+420504+421132+422387+422388+422454+422807+423014+423932+423973+424114+424826+425030+428180+428692+771549	71	29	17.8396	1.6256	0.00245746	0.0308128	100859723;101751177;395694;415805;416743;417706;418498;418690;418992;419175;419444;419609;419822;420199;420504;421132;422387;422388;422454;422807;423014;423932;423973;424114;424826;425030;428180;428692;771549	ENSGALG00000003750;ENSGALG00000033507;ENSGALG00000037043;ENSGALG00000005505;ENSGALG00000004336;ENSGALG00000008842;ENSGALG00000042105;ENSGALG00000034487;ENSGALG00000029709;ENSGALG00000002583;ENSGALG00000009880;ENSGALG00000008081;ENSGALG00000001207;ENSGALG00000009068;ENSGALG00000009445;ENSGALG00000008603;ENSGALG00000034317;ENSGALG00000031538;ENSGALG00000010312;ENSGALG00000002739;ENSGALG00000009085;…
gga03450	Non-homologous end-joining	http://www.kegg.jp/kegg-bin/show_pathway?gga03450+395376+395767+396351+416329+418764+423853+424222+769677	12	8	3.01514	2.65328	0.00284444	0.0331174	395376;395767;396351;416329;418764;423853;424222;769677	ENSGALG00000006983;ENSGALG00000007753;ENSGALG00000016854;ENSGALG00000033781;ENSGALG00000042469;ENSGALG00000011932;ENSGALG00000006794;ENSGALG00000011492
